# Supplementary material for: The Middle Eastern Cousin: Comparative Venomics of Daboia palaestinae and Daboia russelii
Source: Toxins (Basel). 2022 Oct 23;14(11):725. doi: 10.3390/toxins14110725 (PMC9696752; doi:10.3390/toxins14110725)
Supplement: Supplementary file 1 [file toxins-14-00725-s001.zip › Supplementary File S1.pdf]

Summary

1. Notes

2. Result Statistics

Figure S8. False discovery rate (FDR) curve. X axis is the number of peptide-spectrum matches (PSM) being kept. Y axis is the corre sponding FDR.

Protein List

Protein Accession  
Contains:  
Protein Description  
Contains:  
Protein Sample Area  
>=  
Protein PTM Contains:

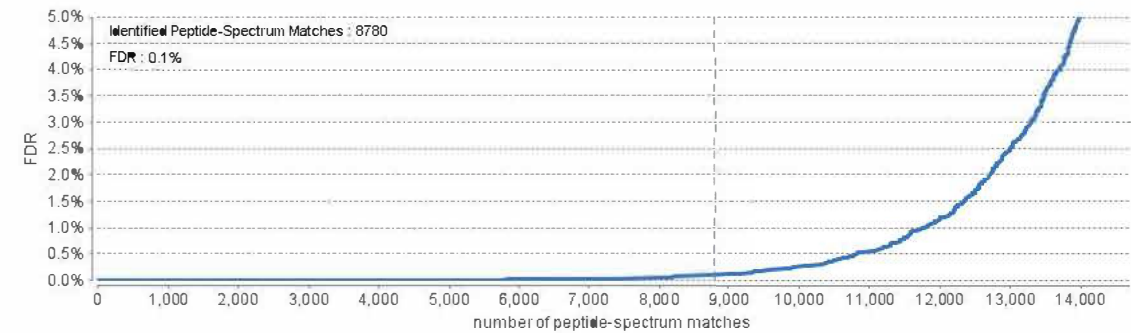

Figure S9. PSM score distribution. (a) Distribution of PEAKS peptide score; (b) Scatterplot of PEAKS peptide score versus precursor mass error.

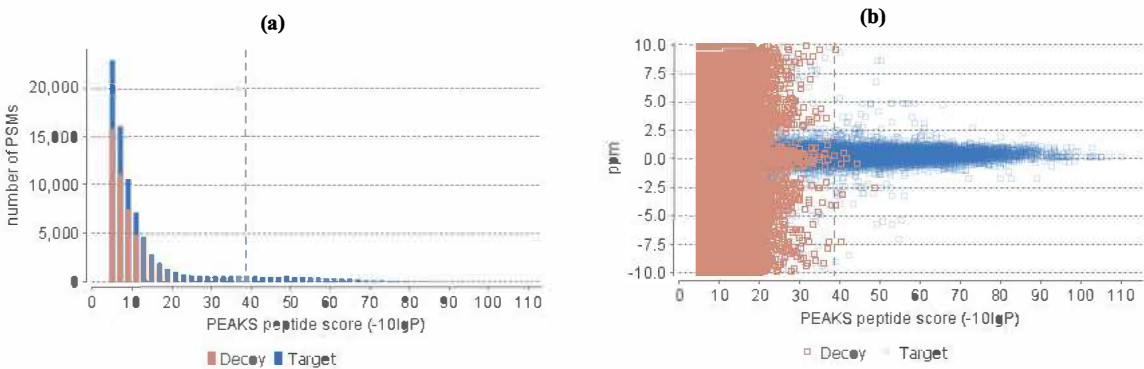

Table S5. Statistics of data.

|       | #Scans |        | #Features | Identified |        |           | #Peptides | #Sequences | #Proteins* |      |     |
|-------|--------|--------|-----------|------------|--------|-----------|-----------|------------|------------|------|-----|
|       | MS1    | MS2    |           | #PSMs      | #Scans | #Features |           |            | Groups     | All  | Top |
| Total | 61192  | 194255 | 216084    | 8780       | 8613   | 17484     | 1139      | 1016       | 164        | 1225 | 501 |
| F1    | 7283   | 29947  | 27286     | 1302       | 1268   | 2226      | 443       | 403        | 82         | 583  | 228 |
| F2    | 8579   | 27501  | 25645     | 1296       | 1262   | 1693      | 414       | 362        | 84         | 586  | 213 |
| F3    | 7215   | 29271  | 40734     | 1484       | 1472   | 2985      | 422       | 374        | 84         | 578  | 237 |
| F4    | 7830   | 28612  | 34895     | 1302       | 1292   | 2937      | 485       | 432        | 101        | 693  | 343 |
| F5    | 10472  | 25367  | 27892     | 1009       | 976    | 2239      | 278       | 251        | 82         | 519  | 263 |
| F6    | 10484  | 26040  | 26892     | 832        | 814    | 2188      | 293       | 269        | 74         | 467  | 280 |
| F7    | 9329   | 27517  | 32740     | 1555       | 1529   | 3216      | 344       | 313        | 91         | 466  | 246 |

\* proteins with significant peptides are used in counts.

Figure S10. Sample overlap for Proteins and Peptides (up to 8 samples). (a) All Proteins; (b) Top Proteins; (c) Peptides;

| (a) |     |     |     |     |     |     |        |     | (b) |     |     |     |     |     |     |        |    | (c) |     |     |     |     |     |     |        |     |
|-----|-----|-----|-----|-----|-----|-----|--------|-----|-----|-----|-----|-----|-----|-----|-----|--------|----|-----|-----|-----|-----|-----|-----|-----|--------|-----|
| 1   | 2   | 3   | 4   | 5   | 6   | 7   | Unique |     | 1   | 2   | 3   | 4   | 5   | 6   | 7   | Unique |    | 1   | 2   | 3   | 4   | 5   | 6   | 7   | Unique |     |
| 1   | 583 | 421 | 408 | 420 | 290 | 264 | 162    | 94  | 1   | 228 | 168 | 152 | 192 | 128 | 148 | 93     | 27 | 1   | 443 | 255 | 220 | 239 | 158 | 143 | 122    | 122 |
| 2   | 421 | 586 | 435 | 446 | 318 | 269 | 170    | 69  | 2   | 168 | 213 | 165 | 190 | 128 | 132 | 90     | 13 | 2   | 255 | 414 | 259 | 254 | 154 | 130 | 115    | 71  |
| 3   | 408 | 435 | 578 | 461 | 345 | 294 | 227    | 39  | 3   | 152 | 165 | 237 | 220 | 168 | 169 | 133    | 8  | 3   | 220 | 259 | 422 | 274 | 162 | 141 | 115    | 82  |
| 4   | 420 | 446 | 461 | 693 | 404 | 414 | 263    | 38  | 4   | 192 | 190 | 220 | 343 | 226 | 253 | 159    | 14 | 4   | 239 | 254 | 274 | 485 | 205 | 199 | 151    | 85  |
| 5   | 290 | 318 | 345 | 404 | 519 | 376 | 279    | 16  | 5   | 128 | 128 | 168 | 226 | 263 | 228 | 168    | 4  | 5   | 158 | 154 | 162 | 205 | 278 | 177 | 146    | 27  |
| 6   | 264 | 269 | 294 | 414 | 376 | 467 | 247    | 19  | 6   | 148 | 132 | 169 | 253 | 228 | 280 | 159    | 4  | 6   | 143 | 130 | 141 | 199 | 177 | 293 | 139    | 50  |
| 7   | 162 | 170 | 227 | 263 | 279 | 247 | 466    | 138 | 7   | 93  | 90  | 133 | 159 | 168 | 159 | 246    | 54 | 7   | 122 | 115 | 115 | 151 | 146 | 139 | 344    | 154 |

Figure S11. Distribution of peptide feature detection. (a) Feature m/z distribution; (b) Feature RT distribution.

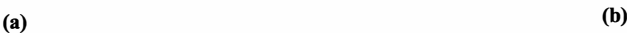

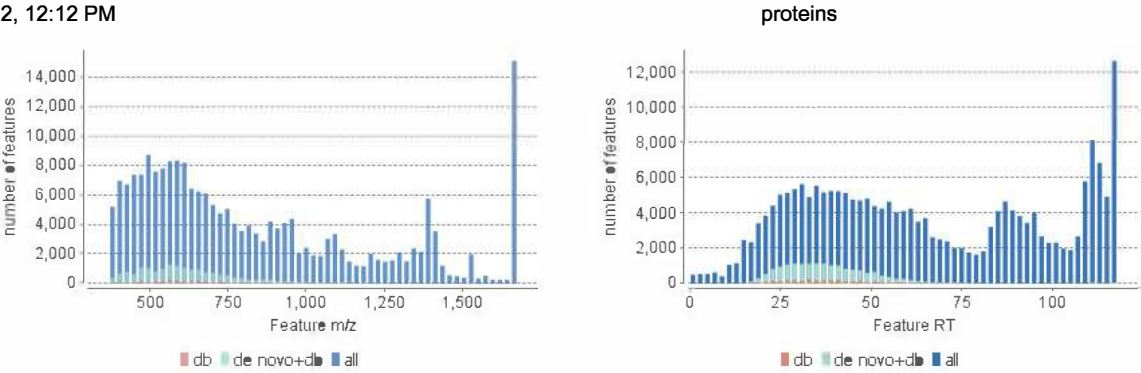

Figure S12. Distribution of identified peptide features. (a) Feature abundance distribution; (b) *De novo* sequencing validation.

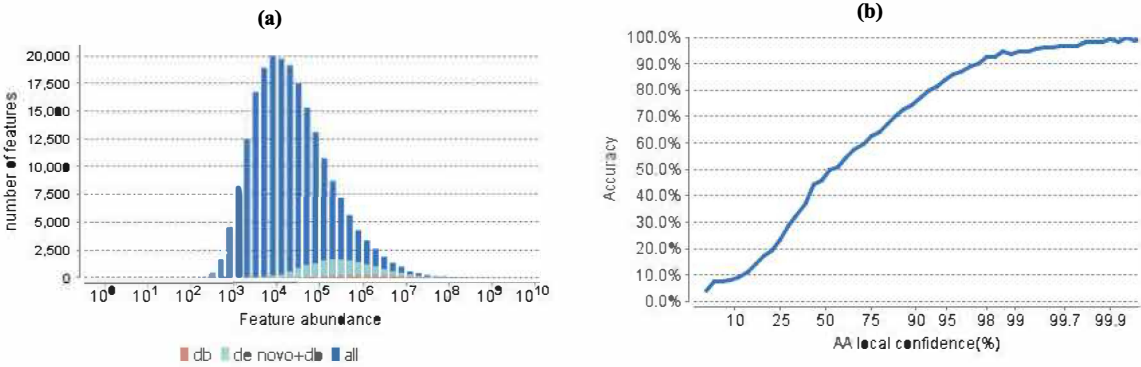

Table S6. Result filtration parameters.

|                          |       |
|--------------------------|-------|
| Peptide -10lgP           | ≥38.7 |
| PTM AScore               | ≥0    |
| Protein -10lgP           | ≥20   |
| Proteins unique peptides | ≥1    |
| De novo score(%)         | ≥50%  |

Table S8. PTM profile.

| Name            | ΔMass | Position | #PSM | -10lgP | Abundance | AScore  |
|-----------------|-------|----------|------|--------|-----------|---------|
| Oxidation       | 15.99 | M        | 1758 | 89.44  | 5.86E6    | 1000.00 |
| Carbamidomethyl | 57.02 | C        | 28   | 60.69  | 1.42E6    | 1000.00 |

Table S7. Statistics of filtered result.

|                                |       |
|--------------------------------|-------|
| FDR (Peptide-Spectrum Matches) |       |
| FDR (Peptide Sequences)        | 0.8%  |
| FDR (Protein Group)            | 6.0%  |
| De Novo Only Spectra           | 25886 |

### 3. Experiment Control

Figure S13. Precursor mass error of peptide-spectrum matches (PSM) in filtered result. (a) Distribution of precursor mass error in ppm; (b) Scatterplot of precursor m/z versus precursor mass error in ppm.

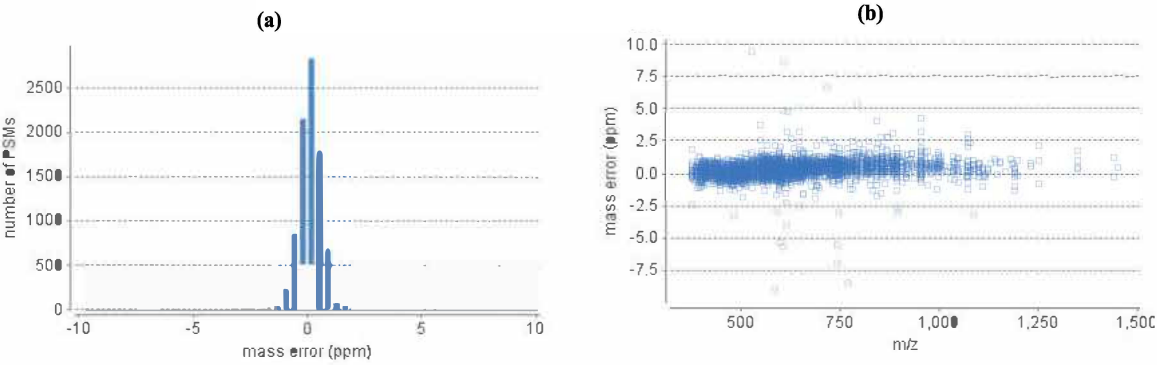

Table S9. Number of identified peptides in each sample by the number of missed cleavages.

| Missed Cleavages | 0   | 1   | 2  | 3 | 4+ |
|------------------|-----|-----|----|---|----|
| F1               | 313 | 113 | 15 | 2 | 0  |
| F2               | 325 | 78  | 11 | 0 | 0  |
| F3               | 308 | 96  | 18 | 0 | 0  |
| F4               | 381 | 94  | 9  | 1 | 0  |
| F5               | 235 | 39  | 4  | 0 | 0  |
| F6               | 239 | 49  | 5  | 0 | 0  |
| F7               | 276 | 60  | 8  | 0 | 0  |

4. Other Information

**Table S10.** Search parameters.  
Search Engine Name: PEAKS  
Parent Mass Error Tolerance: 10.0 ppm  
Fragment Mass Error Tolerance: 0.6 Da  
Precursor Mass Search Type: monoisotopic  
Enzyme: Trypsin  
Max Missed Cleavages: 3  
Digest Mode: Semispecific  
Fixed Modifications:  
  Carbamidomethylation: 57.02  
Variable Modifications:  
  Oxidation (M): 15.99  
Max Variable PTM Per Peptide: 3  
Database: Dpal\_Serpent\_NR  
Taxon: All  
Contaminant Database: cRAP\_contaminants  
Searched Entry: 572962  
FDR Estimation: Enabled  
Merge Options: no merge  
Precursor Options: corrected  
Charge Options: no correction  
Filter m/z: 200.0 - 1800.0  
Filter Charge: 1 - 8  
Process: true  
Associate chimera: yes

**Table S11.** Instrument parameters.  
Fractions: 12112021\_RID\_2349\_DP1.raw, 12112021\_RID\_2349\_DP2.raw  
  , 17112021\_RID\_2349\_DP3.raw, 17112021\_RID\_2349\_DP4.raw, 17112  
  021\_RID\_2349\_DP5.raw, 17112021\_RID\_2349\_DP6.raw, 17112021\_RID  
  \_2349\_DP7.raw  
Ion Source: ESI(nano-spray)  
Fragmentation Mode: CID, CAD(y and b ions)  
MS Scan Mode: FT-ICR/Orbitrap  
MS/MS Scan Mode: FT-ICR/Orbitrap

| Protein Group | Protein ID | Accession                      | -10lgP | Coverage (%) | Coverage (%) F1 | Coverage (%) F2 | Coverage (%) F3 | Coverage (%) F4 | Coverage (%) F5 | Coverage (%) F6 | Coverage (%) F7 | Area F1  | Area F2  | Area F3  | A   |
|---------------|------------|--------------------------------|--------|--------------|-----------------|-----------------|-----------------|-----------------|-----------------|-----------------|-----------------|----------|----------|----------|-----|
| 1             | 69771      | <a href="#">TRINITY_DN9</a>    | 397.42 | 65           | 42              | 40              | 48              | 38              | 21              | 15              | 7               | 6.0902E8 | 1.4832E8 | 2.8298E8 | 1.4 |
| 21            | 69773      | <a href="#">TRINITY_DN233</a>  | 359.11 | 51           | 42              | 45              | 24              | 26              | 5               | 4               | 3               | 1.5641E8 | 4.5667E7 | 1.4274E7 | 4.2 |
| 27            | 7          | <a href="#">AHJ80886.1</a>     | 337.24 | 49           | 38              | 34              | 36              | 40              | 16              | 3               | 9               | 6.4491E7 | 1.3431E7 | 2.4346E7 | 1.3 |
| 12            | 5          | <a href="#">G8XQX1.1</a>       | 332.80 | 56           | 28              | 25              | 27              | 23              | 13              | 9               | 17              |          |          |          |     |
| 12            | 6          | <a href="#">ACF70483.1</a>     | 332.80 | 56           | 28              | 25              | 27              | 23              | 13              | 9               | 17              |          |          |          |     |
| 18            | 69775      | <a href="#">TRINITY_DN0</a>    | 307.80 | 38           | 16              | 31              | 27              | 23              | 11              | 6               | 4               | 9.7514E5 | 9.7519E7 | 3.3637E7 | 1.3 |
| 50            | 69777      | <a href="#">TRINITY_DN132</a>  | 293.50 | 30           | 24              | 11              | 13              | 7               | 0               | 0               | 0               | 8.2659E7 | 8.1798E6 | 8.9798E6 | 3.8 |
| 17            | 69809      | <a href="#">TRINITY_DN441</a>  | 270.06 | 71           | 29              | 29              | 29              | 71              | 37              | 38              | 0               | 1.7543E6 | 2.3578E6 | 5.09E8   | 1.3 |
| 101           | 69780      | <a href="#">TRINITY_DN1507</a> | 257.03 | 24           | 24              | 5               | 1               | 1               | 0               | 0               | 0               | 2.7944E7 | 1.0493E5 | 4.3717E4 | 1.4 |
| 101           | 69780      | <a href="#">TRINITY_DN1507</a> | 257.03 | 24           | 24              | 5               | 1               | 1               | 0               | 0               | 0               | 2.7944E7 | 1.0493E5 | 4.3717E4 | 1.4 |
| 101           | 69782      | <a href="#">TRINITY_DN1507</a> | 257.03 | 22           | 22              | 5               | 1               | 1               | 0               | 0               | 0               | 2.7944E7 | 1.0493E5 | 4.3717E4 | 1.4 |
| 101           | 69783      | <a href="#">TRINITY_DN1507</a> | 257.03 | 21           | 21              | 4               | 1               | 1               | 0               | 0               | 0               | 2.7944E7 | 1.0493E5 | 4.3717E4 | 1.4 |
| 101           | 69784      | <a href="#">TRINITY_DN1507</a> | 257.03 | 22           | 22              | 5               | 1               | 1               | 0               | 0               | 0               | 2.7944E7 | 1.0493E5 | 4.3717E4 | 1.4 |
| 101           | 69785      | <a href="#">TRINITY_DN1507</a> | 257.03 | 20           | 20              | 4               | 1               | 1               | 0               | 0               | 0               | 2.7944E7 | 1.0493E5 | 4.3717E4 | 1.4 |
| 61            | 69796      | <a href="#">TRINITY_DN30</a>   | 254.87 | 13           | 10              | 10              | 13              | 10              | 6               | 1               | 0               | 2.1784E5 | 1.6365E6 | 7.4177E6 | 3.3 |
| 61            | 239        | <a href="#">TRINITY_DN30</a>   | 254.87 | 13           | 10              | 10              | 13              | 10              | 6               | 1               | 0               | 2.1784E5 | 1.6365E6 | 7.4177E6 | 3.3 |
| 39            | 70         | <a href="#">BAN82155.1</a>     | 251.91 | 22           | 6               | 17              | 12              | 11              | 5               | 2               | 0               |          | 3.5059E4 |          |     |

total 523 p

| Protein Group | Protein ID | Accession                      | -10lgP | Coverage (%) | Coverage (%) F1 | Coverage (%) F2 | Coverage (%) F3 | Coverage (%) F4 | Coverage (%) F5 | Coverage (%) F6 | Coverage (%) F7 | Area F1  | Area F2  | Area F3  | A   |
|---------------|------------|--------------------------------|--------|--------------|-----------------|-----------------|-----------------|-----------------|-----------------|-----------------|-----------------|----------|----------|----------|-----|
| 79            | 69799      | <a href="#">TRINITY_DN266</a>  | 248.99 | 36           | 22              | 25              | 16              | 30              | 18              | 0               | 4               | 4.5074E6 | 4.1083E6 | 2.5052E6 | 4.8 |
| 5             | 69839      | <a href="#">TRINITY_DN240</a>  | 245.05 | 44           | 13              | 13              | 44              | 28              | 20              | 8               | 6               | 2.2296E6 | 1.724E7  | 8.9727E9 | 2.7 |
| 68            | 69803      | <a href="#">TRINITY_DN59</a>   | 243.26 | 37           | 6               | 0               | 0               | 0               | 16              | 37              | 9               | 2.9622E6 |          |          |     |
| 68            | 69804      | <a href="#">TRINITY_DN59</a>   | 243.26 | 37           | 6               | 0               | 0               | 0               | 16              | 37              | 9               | 2.9622E6 |          |          |     |
| 68            | 69803      | <a href="#">TRINITY_DN59</a>   | 243.26 | 37           | 6               | 0               | 0               | 0               | 16              | 37              | 9               | 2.9622E6 |          |          |     |
| 43            | 69825      | <a href="#">TRINITY_DN1385</a> | 231.26 | 40           | 37              | 32              | 33              | 31              | 31              | 0               | 0               | 2.7681E7 | 2.4791E7 | 1.6852E8 | 2.7 |
| 90            | 304        | <a href="#">QHR82712.1</a>     | 229.92 | 32           | 17              | 25              | 16              | 24              | 13              | 0               | 0               | 6.057E5  | 4.6515E6 |          |     |
| 86            | 129        | <a href="#">AFE84762.1</a>     | 229.84 | 35           | 0               | 35              | 9               | 10              | 3               | 0               | 0               | 3.0729E6 |          |          |     |
| 14            | 69867      | <a href="#">TRINITY_DN554</a>  | 226.40 | 16           | 0               | 0               | 0               | 0               | 16              | 11              | 11              |          |          |          |     |
| 144           | 69793      | <a href="#">TRINITY_DN1031</a> | 219.72 | 19           | 0               | 6               | 12              | 6               | 0               | 0               | 0               | 1.7546E6 | 7.494E7  | 1.6      |     |
| 144           | 69793      | <a href="#">TRINITY_DN1031</a> | 219.72 | 19           | 0               | 6               | 12              | 6               | 0               | 0               | 0               | 1.7546E6 | 7.494E7  | 1.6      |     |
| 144           | 69793      | <a href="#">TRINITY_DN1031</a> | 219.72 | 19           | 0               | 6               | 12              | 6               | 0               | 0               | 0               | 1.7546E6 | 7.494E7  | 1.6      |     |
| 32            | 382        | <a href="#">Q9PT40.1</a>       | 215.17 | 26           | 8               | 17              | 23              | 18              | 11              | 3               | 0               | 3.788E5  | 1.6386E8 | 5.3429E8 | 5.4 |
| 32            | 383        | <a href="#">CAB62591.1</a>     | 215.17 | 26           | 8               | 17              | 23              | 18              | 11              | 3               | 0               | 3.788E5  | 1.6386E8 | 5.3429E8 | 5.4 |
| 46            | 505        | <a href="#">P0DL42.1</a>       | 206.88 | 39           | 0               | 0               | 0               | 7               | 0               | 0               | 39              |          |          |          |     |
| 75            | 285        | <a href="#">Q4VM07.1</a>       | 205.78 | 12           | 9               | 6               | 9               | 4               | 2               | 4               | 1               | 2.3772E6 | 4.2446E5 | 8.333E6  | 2.5 |
| 75            | 286        | <a href="#">AAX38182.1</a>     | 205.78 | 12           | 9               | 6               | 9               | 4               | 2               | 4               | 1               | 2.3772E6 | 4.2446E5 | 8.333E6  | 2.5 |
| 25            | 70177      | <a href="#">TRINITY_DN459</a>  | 199.41 | 11           | 11              | 11              | 11              | 11              | 11              | 11              | 11              | 1.2856E8 | 3.7626E6 | 6.1058E7 | 4.1 |
| 25            | 70311      | <a href="#">TRINITY_DN1910</a> | 199.41 | 23           | 23              | 23              | 23              | 23              | 23              | 23              | 23              | 1.2856E8 | 3.7626E6 | 6.1058E7 | 4.1 |
| 180           | 69790      | <a href="#">TRINITY_DN509</a>  | 198.91 | 18           | 0               | 6               | 0               | 12              | 3               | 0               | 0               | 1.3078E5 |          |          | 5.3 |
| 180           | 69791      | <a href="#">TRINITY_DN509</a>  | 198.91 | 17           | 0               | 6               | 0               | 11              | 2               | 0               | 0               | 1.3078E5 |          |          | 5.3 |
| 41            | 465        | <a href="#">ADK22823.1</a>     | 197.97 | 31           | 0               | 0               | 0               | 0               | 5               | 14              | 21              |          |          |          |     |
| 41            | 466        | <a href="#">ABA86561.1</a>     | 197.97 | 31           | 0               | 0               | 0               | 0               | 5               | 14              | 21              |          |          |          |     |
| 41            | 467        | <a href="#">Q38L02.1</a>       | 197.97 | 31           | 0               | 0               | 0               | 0               | 5               | 14              | 21              |          |          |          |     |

total 523 p

| Protein Group | Protein ID | Accession                      | -10lgP | Coverage (%) | Coverage (%) F1 | Coverage (%) F2 | Coverage (%) F3 | Coverage (%) F4 | Coverage (%) F5 | Coverage (%) F6 | Coverage (%) F7 | Area F1  | Area F2  | Area F3  | A   |
|---------------|------------|--------------------------------|--------|--------------|-----------------|-----------------|-----------------|-----------------|-----------------|-----------------|-----------------|----------|----------|----------|-----|
| 41            | 476        | <a href="#">ADK22821.1</a>     | 197.97 | 31           | 0               | 0               | 0               | 0               | 5               | 14              | 21              |          |          |          |     |
| 22            | 442        | <a href="#">AAZ53176.1</a>     | 195.25 | 40           | 9               | 9               | 9               | 9               | 9               | 9               | 40              | 5.8348E5 | 5.2464E4 | 1.2575E6 | 2.1 |
| 22            | 443        | <a href="#">A8CG78.1</a>       | 195.25 | 40           | 9               | 9               | 9               | 9               | 9               | 9               | 40              | 5.8348E5 | 5.2464E4 | 1.2575E6 | 2.1 |
| 22            | 444        | <a href="#">AAZ53181.1</a>     | 195.25 | 40           | 9               | 9               | 9               | 9               | 9               | 9               | 40              | 5.8348E5 | 5.2464E4 | 1.2575E6 | 2.1 |
| 22            | 445        | <a href="#">A8CG87.1</a>       | 195.25 | 40           | 9               | 9               | 9               | 9               | 9               | 9               | 40              | 5.8348E5 | 5.2464E4 | 1.2575E6 | 2.1 |
| 91            | 69842      | <a href="#">TRINITY_DN64</a>   | 193.05 | 37           | 8               | 8               | 19              | 19              | 37              | 8               | 8               |          |          | 5.8246E5 | 1.5 |
| 91            | 525        | <a href="#">B4XS9.1</a>        | 193.05 | 30           | 6               | 6               | 15              | 15              | 30              | 6               | 6               |          |          | 5.8246E5 | 1.5 |
| 91            | 526        | <a href="#">ABW82661.1</a>     | 193.05 | 30           | 6               | 6               | 15              | 15              | 30              | 6               | 6               |          |          | 5.8246E5 | 1.5 |
| 91            | 527        | <a href="#">B4XSZ0.1</a>       | 193.05 | 30           | 6               | 6               | 15              | 15              | 30              | 6               | 6               |          |          | 5.8246E5 | 1.5 |
| 91            | 528        | <a href="#">ABW82662.1</a>     | 193.05 | 30           | 6               | 6               | 15              | 15              | 30              | 6               | 6               |          |          | 5.8246E5 | 1.5 |
| 195           | 223        | <a href="#">TRINITY_DN91</a>   | 192.10 | 8            | 8               | 0               | 0               | 0               | 0               | 0               | 0               | 5.1733E5 |          |          |     |
| 195           | 223        | <a href="#">TRINITY_DN91</a>   | 192.10 | 8            | 8               | 0               | 0               | 0               | 0               | 0               | 0               | 5.1733E5 |          |          |     |
| 195           | 223        | <a href="#">TRINITY_DN91</a>   | 192.10 | 8            | 8               | 0               | 0               | 0               | 0               | 0               | 0               | 5.1733E5 |          |          |     |
| 195           | 223        | <a href="#">TRINITY_DN91</a>   | 192.10 | 8            | 8               | 0               | 0               | 0               | 0               | 0               | 0               | 5.1733E5 |          |          |     |
| 195           | 223        | <a href="#">TRINITY_DN91</a>   | 192.10 | 8            | 8               | 0               | 0               | 0               | 0               | 0               | 0               | 5.1733E5 |          |          |     |
| 146           | 165        | <a href="#">ETE57948.1</a>     | 190.95 | 30           | 6               | 30              | 6               | 13              | 3               | 9               | 0               | 3.5744E5 | 4.2136E6 | 1.2599E5 | 5.4 |
| 146           | 166        | <a href="#">JAC96363.1</a>     | 190.95 | 29           | 6               | 29              | 6               | 13              | 3               | 9               | 0               | 3.5744E5 | 4.2136E6 | 1.2599E5 | 5.4 |
| 146           | 167        | <a href="#">JAA97900.1</a>     | 190.95 | 29           | 6               | 29              | 6               | 13              | 3               | 9               | 0               | 3.5744E5 | 4.2136E6 | 1.2599E5 | 5.4 |
| 146           | 168        | <a href="#">LAA21099.1</a>     | 190.95 | 29           | 6               | 29              | 6               | 13              | 3               | 9               | 0               | 3.5744E5 | 4.2136E6 | 1.2599E5 | 5.4 |
| 146           | 169        | <a href="#">JAI10342.1</a>     | 190.95 | 29           | 6               | 29              | 6               | 13              | 3               | 9               | 0               | 3.5744E5 | 4.2136E6 | 1.2599E5 | 5.4 |
| 146           | 170        | <a href="#">JAG68843.1</a>     | 190.95 | 29           | 6               | 29              | 6               | 13              | 3               | 9               | 0               | 3.5744E5 | 4.2136E6 | 1.2599E5 | 5.4 |
| 146           | 171        | <a href="#">XP_013921350.1</a> | 190.95 | 29           | 6               | 29              | 6               | 13              | 3               | 9               | 0               | 3.5744E5 | 4.2136E6 | 1.2599E5 | 5.4 |
| 146           | 172        | <a href="#">JAB54771.1</a>     | 190.95 | 29           | 6               | 29              | 6               | 13              | 3               | 9               | 0               | 3.5744E5 | 4.2136E6 | 1.2599E5 | 5.4 |
| 146           | 173        | <a href="#">JAA97901.1</a>     | 190.95 | 29           | 6               | 29              | 6               | 13              | 3               | 9               | 0               | 3.5744E5 | 4.2136E6 | 1.2599E5 | 5.4 |
| 146           | 174        | <a href="#">JAG68844.1</a>     | 190.95 | 29           | 6               | 29              | 6               | 13              | 3               | 9               | 0               | 3.5744E5 | 4.2136E6 | 1.2599E5 | 5.4 |
| 146           | 175        | <a href="#">LAA21098.1</a>     | 190.95 | 29           | 6               | 29              | 6               | 13              | 3               | 9               | 0               | 3.5744E5 | 4.2136E6 | 1.2599E5 | 5.4 |
| 146           | 176        | <a href="#">JAV51374.1</a>     | 190.95 | 29           | 6               | 29              | 6               | 13              | 3               | 9               | 0               | 3.5744E5 | 4.2136E6 | 1.2599E5 | 5.4 |
| 146           | 177        | <a href="#">JAG47580.1</a>     | 190.95 | 29           | 6               | 29              | 6               | 13              | 3               | 9               | 0               | 3.5744E5 | 4.2136E6 | 1.2599E5 | 5.4 |
| 146           | 178        | <a href="#">AFJ49303.1</a>     | 190.95 | 29           | 6               | 29              | 6               | 13              | 3               | 9               | 0               | 3.5744E5 | 4.2136E6 | 1.2599E5 | 5.4 |
| 146           | 179        | <a href="#">JAI14496.1</a>     | 190.95 | 29           | 6               | 29              | 6               | 13              | 3               | 9               | 0               | 3.5744E5 | 4.2136E6 | 1.2599E5 | 5.4 |
| 146           | 180        | <a href="#">JAI10341.1</a>     | 190.95 | 29           | 6               | 29              | 6               | 13              | 3               | 9               | 0               | 3.5744E5 | 4.2136E6 | 1.2599E5 | 5.4 |
| 146           | 181        | <a href="#">JAI14495.1</a>     | 190.95 | 29           | 6               | 29              | 6               | 13              | 3               | 9               | 0               | 3.5744E5 | 4.2136E6 | 1.2599E5 | 5.4 |
| 146           | 182        | <a href="#">JAC96364.1</a>     | 190.95 | 29           | 6               | 29              | 6               | 13              | 3               | 9               | 0               | 3.5744E5 | 4.2136E6 | 1.2599E5 | 5.4 |

total 523 p

| Protein Group | Protein ID | Accession                      | -10lgP | Coverage (%) | Coverage (%) F1 | Coverage (%) F2 | Coverage (%) F3 | Coverage (%) F4 | Coverage (%) F5 | Coverage (%) F6 | Coverage (%) F7 | Area F1  | Area F2  | Area F3  | A   |
|---------------|------------|--------------------------------|--------|--------------|-----------------|-----------------|-----------------|-----------------|-----------------|-----------------|-----------------|----------|----------|----------|-----|
| 146           | 183        | <a href="#">JAG47579.1</a>     | 190.95 | 29           | 6               | 29              | 6               | 13              | 3               | 9               | 0               | 3.5744E5 | 4.2136E6 | 1.2599E5 | 5.4 |
| 146           | 184        | <a href="#">JAV51372.1</a>     | 190.95 | 29           | 6               | 29              | 6               | 13              | 3               | 9               | 0               | 3.5744E5 | 4.2136E6 | 1.2599E5 | 5.4 |
| 146           | 185        | <a href="#">AFJ49302.1</a>     | 190.95 | 29           | 6               | 29              | 6               | 13              | 3               | 9               | 0               | 3.5744E5 | 4.2136E6 | 1.2599E5 | 5.4 |
| 146           | 186        | <a href="#">BAQ22177.1</a>     | 190.95 | 29           | 6               | 29              | 6               | 13              | 3               | 9               | 0               | 3.5744E5 | 4.2136E6 | 1.2599E5 | 5.4 |
| 146           | 187        | <a href="#">JAG45996.1</a>     | 190.95 | 29           | 6               | 29              | 6               | 13              | 3               | 9               | 0               | 3.5744E5 | 4.2136E6 | 1.2599E5 | 5.4 |
| 146           | 188        | <a href="#">JAG45999.1</a>     | 190.95 | 29           | 6               | 29              | 6               | 13              | 3               | 9               | 0               | 3.5744E5 | 4.2136E6 | 1.2599E5 | 5.4 |
| 146           | 189        | <a href="#">JAB54395.1</a>     | 190.95 | 29           | 6               | 29              | 6               | 13              | 3               | 9               | 0               | 3.5744E5 | 4.2136E6 | 1.2599E5 | 5.4 |
| 146           | 190        | <a href="#">ETE74025.1</a>     | 190.95 | 29           | 6               | 29              | 6               | 13              | 3               | 9               | 0               | 3.5744E5 | 4.2136E6 | 1.2599E5 | 5.4 |
| 78            | 529        | <a href="#">ADK22827.1</a>     | 188.30 | 28           | 6               | 6               | 6               | 13              | 28              | 13              | 13              |          |          |          | 1.4 |
| 78            | 530        | <a href="#">ADK22825.1</a>     | 188.30 | 28           | 6               | 6               | 6               | 13              | 28              | 13              | 13              |          |          |          | 1.4 |
| 60            | 540        | <a href="#">ADN04916.1</a>     | 186.74 | 21           | 4               | 21              | 13              | 12              | 3               | 0               | 0               | 5.4582E5 | 1.8664E8 | 4.7221E7 | 2.0 |
| 60            | 541        | <a href="#">E0Y418.1</a>       | 186.74 | 21           | 4               | 21              | 13              | 12              | 3               | 0               | 0               | 5.4582E5 | 1.8664E8 | 4.7221E7 | 2.0 |
| 11            | 394        | <a href="#">ADK22824.1</a>     | 186.62 | 35           | 0               | 0               | 0               | 0               | 5               | 0               | 35              |          |          |          |     |
| 11            | 395        | <a href="#">AAY63876.1</a>     | 186.62 | 35           | 0               | 0               | 0               | 0               | 5               | 0               | 35              |          |          |          |     |
| 11            | 396        | <a href="#">ADK22822.1</a>     | 186.62 | 35           | 0               | 0               | 0               | 0               | 5               | 0               | 35              |          |          |          |     |
| 11            | 397        | <a href="#">Q4PRC6.1</a>       | 186.62 | 35           | 0               | 0               | 0               | 0               | 5               | 0               | 35              |          |          |          |     |
| 94            | 70178      | <a href="#">TRINITY_DN459</a>  | 183.64 | 13           | 13              | 13              | 13              | 13              | 13              | 10              | 6               | 1.125E6  | 1.1654E6 | 6.0058E5 | 1.5 |
| 155           | 69806      | <a href="#">TRINITY_DN157</a>  | 183.50 | 36           | 4               | 4               | 4               | 4               | 4               | 4               | 36              |          |          |          |     |
| 107           | 430        | <a href="#">P18964.1</a>       | 181.11 | 18           | 0               | 0               | 18              | 18              | 0               | 0               | 18              |          |          | 2.9668E7 | 1.3 |
| 107           | 439        | <a href="#">ADP88558.1</a>     | 181.11 | 17           | 0               | 0               | 17              | 17              | 0               | 0               | 17              |          |          | 2.9668E7 | 1.3 |
| 107           | 441        | <a href="#">P18965.2</a>       | 181.11 | 17           | 0               | 0               | 17              | 17              | 0               | 0               | 17              |          |          | 2.9668E7 | 1.3 |
| 178           | 295        | <a href="#">TRINITY_DN2646</a> | 180.73 | 28           | 0               | 19              | 28              | 0               | 0               | 0               | 0               |          | 3.8106E5 | 7.4529E6 |     |
| 178           | 295        | <a href="#">TRINITY_DN2646</a> | 180.73 | 28           | 0               | 19              | 28              | 0               | 0               | 0               | 0               |          | 3.8106E5 | 7.4529E6 |     |
| 196           | 69797      | <a href="#">TRINITY_DN300</a>  | 179.20 | 13           | 13              | 0               | 0               | 0               | 0               | 0               | 0               | 1.7343E6 |          |          |     |
| 196           | 69797      | <a href="#">TRINITY_DN300</a>  | 179.20 | 13           | 13              | 0               | 0               | 0               | 0               | 0               | 0               | 1.7343E6 |          |          |     |
| 147           | 308        | <a href="#">B8K1W0.1</a>       | 178.02 | 10           | 10              | 3               | 4               | 2               | 0               | 0               | 1               | 1.2744E7 | 1.1059E5 |          | 2.1 |
| 147           | 309        | <a href="#">AAZ39880.1</a>     | 178.02 | 10           | 10              | 3               | 4               | 2               | 0               | 0               | 1               | 1.2744E7 | 1.1059E5 |          | 2.1 |
| 129           | 410        | <a href="#">ACE73567.1</a>     | 175.01 | 15           | 4               | 0               | 0               | 14              | 10              | 0               | 15              |          |          |          | 8.1 |

total 523 p

| Protein Group | Protein ID | Accession                      | -10lgP | Coverage (%) | Coverage (%) F1 | Coverage (%) F2 | Coverage (%) F3 | Coverage (%) F4 | Coverage (%) F5 | Coverage (%) F6 | Coverage (%) F7 | Area F1  | Area F2  | Area F3  | A   |
|---------------|------------|--------------------------------|--------|--------------|-----------------|-----------------|-----------------|-----------------|-----------------|-----------------|-----------------|----------|----------|----------|-----|
| 189           | 69815      | <a href="#">TRINITY_DN324</a>  | 174.06 | 15           | 0               | 13              | 6               | 0               | 0               | 0               | 0               |          | 1.5152E6 | 1.8195E6 |     |
| 13            | 69822      | <a href="#">TRINITY_DN441</a>  | 172.25 | 35           | 11              | 18              | 26              | 22              | 16              | 22              | 0               |          | 1.2908E7 | 7.0313E9 | 2.2 |
| 113           | 348        | <a href="#">AUF41660.1</a>     | 170.03 | 10           | 6               | 3               | 7               | 5               | 4               | 3               | 4               |          |          |          |     |
| 28            | 512        | <a href="#">CAR40186.1</a>     | 169.60 | 28           | 9               | 9               | 9               | 9               | 9               | 8               | 28              | 8.1854E6 | 6.5995E6 | 3.4681E7 | 2.1 |
| 28            | 513        | <a href="#">BSU6Z2.1</a>       | 169.60 | 28           | 9               | 9               | 9               | 9               | 9               | 8               | 28              | 8.1854E6 | 6.5995E6 | 3.4681E7 | 2.1 |
| 125           | 69855      | <a href="#">TRINITY_DN59</a>   | 169.25 | 23           | 0               | 0               | 0               | 7               | 6               | 23              | 14              |          |          |          | 9.8 |
| 157           | 69824      | <a href="#">TRINITY_DN278</a>  | 169.22 | 33           | 0               | 0               | 0               | 11              | 0               | 0               | 33              |          |          |          | 1.4 |
| 157           | 403        | <a href="#">AJO70723.1</a>     | 169.22 | 27           | 0               | 0               | 0               | 9               | 0               | 0               | 27              |          |          |          | 1.4 |
| 64            | 440        | <a href="#">XP_034272439.1</a> | 168.51 | 5            | 3               | 3               | 2               | 4               | 4               | 4               | 5               | 5.1514E5 | 3.8767E5 | 3.8979E5 | 2.4 |
| 93            | 769        | <a href="#">QBF53416.1</a>     | 167.52 | 9            | 4               | 4               | 5               | 9               | 5               | 5               | 5               |          |          |          | 4.3 |
| 44            | 69826      | <a href="#">TRINITY_DN59</a>   | 166.98 | 37           | 0               | 0               | 0               | 0               | 6               | 34              | 15              |          |          |          |     |
| 44            | 69826      | <a href="#">TRINITY_DN59</a>   | 166.98 | 37           | 0               | 0               | 0               | 0               | 6               | 34              | 15              |          |          |          |     |
| 179           | 236        | <a href="#">TRINITY_DN283</a>  | 165.03 | 10           | 1               | 10              | 0               | 0               | 0               | 0               | 0               | 4.1868E4 | 2.2513E6 |          |     |
| 179           | 236        | <a href="#">TRINITY_DN283</a>  | 165.03 | 10           | 1               | 10              | 0               | 0               | 0               | 0               | 0               | 4.1868E4 | 2.2513E6 |          |     |
| 179           | 236        | <a href="#">TRINITY_DN283</a>  | 165.03 | 10           | 1               | 10              | 0               | 0               | 0               | 0               | 0               | 4.1868E4 | 2.2513E6 |          |     |
| 179           | 236        | <a href="#">TRINITY_DN283</a>  | 165.03 | 10           | 1               | 10              | 0               | 0               | 0               | 0               | 0               | 4.1868E4 | 2.2513E6 |          |     |
| 179           | 236        | <a href="#">TRINITY_DN283</a>  | 165.03 | 10           | 1               | 10              | 0               | 0               | 0               | 0               | 0               | 4.1868E4 | 2.2513E6 |          |     |
| 179           | 236        | <a href="#">TRINITY_DN283</a>  | 165.03 | 10           | 1               | 10              | 0               | 0               | 0               | 0               | 0               | 4.1868E4 | 2.2513E6 |          |     |
| 134           | 69816      | <a href="#">TRINITY_DN714</a>  | 161.86 | 15           | 4               | 4               | 4               | 5               | 8               | 7               | 0               |          |          |          | 2.3 |
| 183           | 69817      | <a href="#">TRINITY_DN249</a>  | 161.22 | 28           | 0               | 0               | 28              | 0               | 0               | 0               | 0               |          |          | 4.6706E6 |     |
| 183           | 69817      | <a href="#">TRINITY_DN249</a>  | 161.22 | 28           | 0               | 0               | 28              | 0               | 0               | 0               | 0               |          |          | 4.6706E6 |     |
| 183           | 69817      | <a href="#">TRINITY_DN249</a>  | 161.22 | 28           | 0               | 0               | 28              | 0               | 0               | 0               | 0               |          |          | 4.6706E6 |     |
| 173           | 69821      | <a href="#">TRINITY_DN77</a>   | 157.32 | 24           | 0               | 0               | 0               | 24              | 0               | 0               | 2               |          |          |          | 1.6 |

total 523 p

|               |            | proteins                       |        |              |                 |                 |                 |                 |                 |                 |                 |          |          |          |     |
|---------------|------------|--------------------------------|--------|--------------|-----------------|-----------------|-----------------|-----------------|-----------------|-----------------|-----------------|----------|----------|----------|-----|
| Protein Group | Protein ID | Accession                      | -10lgP | Coverage (%) | Coverage (%) F1 | Coverage (%) F2 | Coverage (%) F3 | Coverage (%) F4 | Coverage (%) F5 | Coverage (%) F6 | Coverage (%) F7 | Area F1  | Area F2  | Area F3  | A   |
| 173           | 69823      | <a href="#">TRINITY_DN77</a>   | 157.32 | 31           | 0               | 0               | 0               | 31              | 0               | 0               | 3               |          |          |          | 1.6 |
| 152           | 69807      | <a href="#">TRINITY_DN3925</a> | 157.17 | 14           | 10              | 5               | 10              | 3               | 0               | 0               | 0               | 1.8455E6 | 3.6002E5 | 4.3445E6 | 2.4 |
| 152           | 69808      | <a href="#">TRINITY_DN3925</a> | 157.17 | 11           | 8               | 4               | 8               | 2               | 0               | 0               | 0               | 1.8455E6 | 3.6002E5 | 4.3445E6 | 2.4 |
| 36            | 419        | <a href="#">APB93444.1</a>     | 156.68 | 34           | 7               | 7               | 0               | 7               | 28              | 7               | 34              |          |          |          |     |
| 226           | 69853      | <a href="#">TRINITY_DN195</a>  | 156.40 | 23           | 0               | 0               | 0               | 0               | 0               | 0               | 23              |          |          |          |     |
| 137           | 69852      | <a href="#">TRINITY_DN1793</a> | 155.08 | 21           | 4               | 0               | 0               | 21              | 10              | 0               | 10              |          |          |          | 1.5 |
| 114           | 69914      | <a href="#">TRINITY_DN240</a>  | 153.29 | 22           | 8               | 22              | 22              | 21              | 0               | 8               | 8               |          | 8.1563E6 | 4.8348E7 | 7.9 |
| 114           | 69914      | <a href="#">TRINITY_DN240</a>  | 153.29 | 22           | 8               | 22              | 22              | 21              | 0               | 8               | 8               |          | 8.1563E6 | 4.8348E7 | 7.9 |
| 114           | 69914      | <a href="#">TRINITY_DN240</a>  | 153.29 | 22           | 8               | 22              | 22              | 21              | 0               | 8               | 8               |          | 8.1563E6 | 4.8348E7 | 7.9 |
| 114           | 69914      | <a href="#">TRINITY_DN240</a>  | 153.29 | 22           | 8               | 22              | 22              | 21              | 0               | 8               | 8               |          | 8.1563E6 | 4.8348E7 | 7.9 |
| 114           | 69914      | <a href="#">TRINITY_DN240</a>  | 153.29 | 22           | 8               | 22              | 22              | 21              | 0               | 8               | 8               |          | 8.1563E6 | 4.8348E7 | 7.9 |
| 114           | 69919      | <a href="#">TRINITY_DN240</a>  | 153.29 | 22           | 8               | 22              | 22              | 21              | 0               | 8               | 8               |          | 8.1563E6 | 4.8348E7 | 7.9 |
| 133           | 468        | <a href="#">ETE70217.1</a>     | 151.88 | 1            | 0               | 0               | 0               | 1               | 1               | 1               | 1               |          |          |          |     |
| 246           | 565        | <a href="#">XP_034291429.1</a> | 148.76 | 5            | 5               | 0               | 0               | 0               | 0               | 0               | 0               | 6.0941E4 |          |          |     |
| 246           | 566        | <a href="#">XP_034291427.1</a> | 148.76 | 5            | 5               | 0               | 0               | 0               | 0               | 0               | 0               | 6.0941E4 |          |          |     |
| 246           | 567        | <a href="#">XP_034291428.1</a> | 148.76 | 5            | 5               | 0               | 0               | 0               | 0               | 0               | 0               | 6.0941E4 |          |          |     |
| 194           | 69934      | <a href="#">TRINITY_DN743</a>  | 148.55 | 15           | 0               | 0               | 0               | 0               | 0               | 15              | 15              |          |          |          |     |
| 194           | 69961      | <a href="#">TRINITY_DN743</a>  | 148.55 | 23           | 0               | 0               | 0               | 0               | 0               | 22              | 23              |          |          |          |     |
| 26            | 69833      | <a href="#">TRINITY_DN0</a>    | 148.09 | 19           | 18              | 18              | 14              | 19              | 9               | 14              | 9               | 6.4332E6 | 1.8506E6 | 1.3941E8 | 5.3 |
| 26            | 69834      | <a href="#">TRINITY_DN0</a>    | 148.09 | 18           | 17              | 17              | 13              | 18              | 8               | 13              | 8               | 6.4332E6 | 1.8506E6 | 1.3941E8 | 5.3 |
| 89            | 918        | <a href="#">CBM40646.1</a>     | 146.67 | 12           | 0               | 5               | 9               | 7               | 0               | 3               | 0               |          |          | 0        |     |
| 89            | 943        | <a href="#">CBM40645.1</a>     | 146.67 | 12           | 0               | 5               | 9               | 7               | 0               | 3               | 0               |          |          | 0        |     |
| 89            | 944        | <a href="#">AAR24534.1</a>     | 146.67 | 12           | 0               | 5               | 9               | 7               | 0               | 3               | 0               |          |          | 0        |     |
| 89            | 945        | <a href="#">Q6T6S7.1</a>       | 146.67 | 12           | 0               | 5               | 9               | 7               | 0               | 3               | 0               |          |          | 0        |     |
| 224           | 69820      | <a href="#">TRINITY_DN94</a>   | 144.95 | 12           | 0               | 12              | 0               | 0               | 0               | 0               | 0               |          | 8.0435E5 |          |     |
| 95            | 690        | <a href="#">E5AJX2.1</a>       | 137.19 | 13           | 0               | 4               | 9               | 8               | 0               | 0               | 0               |          |          | 5.4903E6 |     |
| 95            | 691        | <a href="#">CBW30778.1</a>     | 137.19 | 13           | 0               | 4               | 9               | 8               | 0               | 0               | 0               |          |          | 5.4903E6 |     |
| 185           | 69894      | <a href="#">TRINITY_DN4675</a> | 137.11 | 13           | 0               | 0               | 0               | 0               | 13              | 0               | 0               |          |          |          |     |

8/2/22, 12:12 PM

proteins

| Protein Group | Protein ID | Accession                      | -10lgP | Coverage (%) | Coverage (%) F1 | Coverage (%) F2 | Coverage (%) F3 | Coverage (%) F4 | Coverage (%) F5 | Coverage (%) F6 | Coverage (%) F7 | Area F1  | Area F2  | Area F3  | A   |
|---------------|------------|--------------------------------|--------|--------------|-----------------|-----------------|-----------------|-----------------|-----------------|-----------------|-----------------|----------|----------|----------|-----|
| 149           | 890        | <a href="#">TRINITY_DN59</a>   | 137.06 | 22           | 0               | 0               | 0               | 0               | 22              | 0               | 0               |          |          |          |     |
| 149           | 890        | <a href="#">TRINITY_DN59</a>   | 137.06 | 22           | 0               | 0               | 0               | 0               | 22              | 0               | 0               |          |          |          |     |
| 149           | 891        | <a href="#">AJO70724.1</a>     | 137.06 | 18           | 0               | 0               | 0               | 0               | 18              | 0               | 0               |          |          |          |     |
| 49            | 69863      | <a href="#">TRINITY_DN588</a>  | 135.41 | 20           | 12              | 6               | 6               | 11              | 6               | 6               | 14              |          |          |          |     |
| 49            | 69863      | <a href="#">TRINITY_DN588</a>  | 135.41 | 20           | 12              | 6               | 6               | 11              | 6               | 6               | 14              |          |          |          |     |
| 218           | 514        | <a href="#">TRINITY_DN6726</a> | 131.08 | 30           | 0               | 0               | 0               | 0               | 6               | 0               | 30              |          |          |          |     |
| 201           | 341        | <a href="#">TRINITY_DN3927</a> | 130.90 | 5            | 4               | 0               | 0               | 2               | 0               | 0               | 0               | 9.7972E5 |          |          | 1.1 |
| 167           | 69841      | <a href="#">TRINITY_DN2452</a> | 130.54 | 24           | 14              | 12              | 19              | 0               | 4               | 0               | 0               | 5.2396E5 | 1.7998E6 | 2.7782E6 |     |
| 48            | 759        | <a href="#">P82475.2</a>       | 130.50 | 26           | 17              | 8               | 8               | 8               | 8               | 8               | 17              |          |          |          |     |
| 166           | 69828      | <a href="#">TRINITY_DN30</a>   | 128.97 | 8            | 6               | 6               | 2               | 0               | 0               | 0               | 0               |          | 0        |          |     |
| 119           | 844        | <a href="#">JAS04521.1</a>     | 128.01 | 12           | 0               | 0               | 5               | 8               | 12              | 12              | 3               |          |          |          |     |
| 119           | 845        | <a href="#">AAG12169.1</a>     | 128.01 | 12           | 0               | 0               | 5               | 8               | 12              | 12              | 3               |          |          |          |     |
| 119           | 998        | <a href="#">JAG46131.1</a>     | 128.01 | 12           | 0               | 0               | 5               | 8               | 12              | 12              | 3               |          |          |          |     |
| 119           | 999        | <a href="#">BAN82015.1</a>     | 128.01 | 12           | 0               | 0               | 5               | 8               | 12              | 12              | 3               |          |          |          |     |
| 119           | 1000       | <a href="#">JAS04781.1</a>     | 128.01 | 12           | 0               | 0               | 5               | 8               | 12              | 12              | 3               |          |          |          |     |
| 119           | 1001       | <a href="#">JAI10407.1</a>     | 128.01 | 12           | 0               | 0               | 5               | 8               | 12              | 12              | 3               |          |          |          |     |
| 119           | 1002       | <a href="#">JAS05454.1</a>     | 128.01 | 12           | 0               | 0               | 5               | 8               | 12              | 12              | 3               |          |          |          |     |
| 119           | 1003       | <a href="#">JAS04703.1</a>     | 128.01 | 12           | 0               | 0               | 5               | 8               | 12              | 12              | 3               |          |          |          |     |
| 119           | 1004       | <a href="#">JAG46130.1</a>     | 128.01 | 12           | 0               | 0               | 5               | 8               | 12              | 12              | 3               |          |          |          |     |
| 119           | 1005       | <a href="#">JAA98018.1</a>     | 128.01 | 12           | 0               | 0               | 5               | 8               | 12              | 12              | 3               |          |          |          |     |
| 119           | 1006       | <a href="#">AAG30924.1</a>     | 128.01 | 12           | 0               | 0               | 5               | 8               | 12              | 12              | 3               |          |          |          |     |
| 119           | 1007       | <a href="#">JAS05315.1</a>     | 128.01 | 12           | 0               | 0               | 5               | 8               | 12              | 12              | 3               |          |          |          |     |
| 119           | 1008       | <a href="#">JAV01886.1</a>     | 128.01 | 12           | 0               | 0               | 5               | 8               | 12              | 12              | 3               |          |          |          |     |
| 119           | 1009       | <a href="#">JAS04865.1</a>     | 128.01 | 12           | 0               | 0               | 5               | 8               | 12              | 12              | 3               |          |          |          |     |
| 119           | 1010       | <a href="#">JAA98019.1</a>     | 128.01 | 12           | 0               | 0               | 5               | 8               | 12              | 12              | 3               |          |          |          |     |
| 119           | 1011       | <a href="#">JAA94888.1</a>     | 128.01 | 12           | 0               | 0               | 5               | 8               | 12              | 12              | 3               |          |          |          |     |
| 119           | 1012       | <a href="#">JAS04864.1</a>     | 128.01 | 12           | 0               | 0               | 5               | 8               | 12              | 12              | 3               |          |          |          |     |
| 119           | 1013       | <a href="#">AFJ49196.1</a>     | 128.01 | 12           | 0               | 0               | 5               | 8               | 12              | 12              | 3               |          |          |          |     |
| 119           | 1014       | <a href="#">JAS04866.1</a>     | 128.01 | 12           | 0               | 0               | 5               | 8               | 12              | 12              | 3               |          |          |          |     |

| Protein Group | Protein ID | Accession                       | -10lgP | Coverage (%) | Coverage (%) F1 | Coverage (%) F2 | Coverage (%) F3 | Coverage (%) F4 | Coverage (%) F5 | Coverage (%) F6 | Coverage (%) F7 | Area F1  | Area F2  | Area F3  | A   |
|---------------|------------|---------------------------------|--------|--------------|-----------------|-----------------|-----------------|-----------------|-----------------|-----------------|-----------------|----------|----------|----------|-----|
| 119           | 1015       | <a href="#">JAG43651.1</a>      | 128.01 | 12           | 0               | 0               | 5               | 8               | 12              | 12              | 3               |          |          |          |     |
| 119           | 1016       | <a href="#">JAV48424.1</a>      | 128.01 | 12           | 0               | 0               | 5               | 8               | 12              | 12              | 3               |          |          |          |     |
| 119           | 1017       | <a href="#">JAG46132.1</a>      | 128.01 | 12           | 0               | 0               | 5               | 8               | 12              | 12              | 3               |          |          |          |     |
| 119           | 1018       | <a href="#">JAA97946.1</a>      | 128.01 | 12           | 0               | 0               | 5               | 8               | 12              | 12              | 3               |          |          |          |     |
| 119           | 982        | <a href="#">BAP39981.1</a>      | 128.01 | 10           | 0               | 0               | 4               | 6               | 10              | 10              | 2               |          |          |          |     |
| 119           | 983        | <a href="#">BAN82142.1</a>      | 128.01 | 10           | 0               | 0               | 4               | 6               | 10              | 10              | 2               |          |          |          |     |
| 151           | 638        | <a href="#">CAP74088.1</a>      | 127.36 | 14           | 0               | 0               | 0               | 14              | 6               | 0               | 9               |          |          |          | 3.1 |
| 241           | 518        | <a href="#">ADJ67475.1</a>      | 127.31 | 5            | 2               | 3               | 0               | 0               | 0               | 0               | 2               |          |          |          |     |
| 221           | 69843      | <a href="#">XP_034278116.1</a>  | 126.21 | 5            | 0               | 0               | 5               | 2               | 0               | 0               | 0               |          |          | 2.9581E6 | 1.2 |
| 138           | 69858      | <a href="#">TRINITY_DN12452</a> | 126.04 | 19           | 0               | 0               | 9               | 9               | 9               | 19              | 9               |          |          | 3.0778E5 | 5.5 |
| 153           | 515        | <a href="#">AUS82489.1</a>      | 125.09 | 11           | 0               | 0               | 7               | 8               | 4               | 3               | 0               |          |          |          | 1.0 |
| 153           | 557        | <a href="#">JAA98031.1</a>      | 125.09 | 11           | 0               | 0               | 7               | 8               | 4               | 3               | 0               |          |          |          | 1.0 |
| 164           | 1055       | <a href="#">TRINITY_DN471</a>   | 123.14 | 19           | 19              | 19              | 12              | 12              | 0               | 12              | 0               | 1.3286E6 | 4.833E6  | 1.0924E7 | 2.5 |
| 117           | 1178       | <a href="#">ADN04917.1</a>      | 122.90 | 8            | 8               | 8               | 8               | 4               | 0               | 4               | 0               | 6.4186E7 | 1.0631E7 | 3.0723E5 |     |
| 117           | 1179       | <a href="#">E0Y419.1</a>        | 122.90 | 8            | 8               | 8               | 8               | 4               | 0               | 4               | 0               | 6.4186E7 | 1.0631E7 | 3.0723E5 |     |
| 123           | 877        | <a href="#">AEH59582.1</a>      | 120.92 | 12           | 0               | 0               | 5               | 8               | 12              | 8               | 3               |          |          |          |     |
| 123           | 866        | <a href="#">QBF53420.1</a>      | 120.92 | 13           | 0               | 0               | 5               | 8               | 13              | 8               | 3               |          |          |          |     |
| 123           | 878        | <a href="#">QHR82782.1</a>      | 120.92 | 12           | 0               | 0               | 5               | 8               | 12              | 8               | 3               |          |          |          |     |
| 123           | 882        | <a href="#">TRINITY_DN1356</a>  | 120.92 | 10           | 0               | 0               | 4               | 6               | 10              | 6               | 2               |          |          |          |     |
| 123           | 882        | <a href="#">TRINITY_DN1356</a>  | 120.92 | 10           | 0               | 0               | 4               | 6               | 10              | 6               | 2               |          |          |          |     |
| 123           | 882        | <a href="#">TRINITY_DN1356</a>  | 120.92 | 10           | 0               | 0               | 4               | 6               | 10              | 6               | 2               |          |          |          |     |
| 123           | 882        | <a href="#">TRINITY_DN1356</a>  | 120.92 | 10           | 0               | 0               | 4               | 6               | 10              | 6               | 2               |          |          |          |     |
| 205           | 69831      | <a href="#">TRINITY_DN180</a>   | 120.88 | 2            | 0               | 0               | 0               | 0               | 0               | 2               | 0               |          | 1.0785E4 |          | 1.2 |
| 205           | 69832      | <a href="#">TRINITY_DN180</a>   | 120.88 | 2            | 0               | 0               | 0               | 0               | 0               | 2               | 0               |          | 1.0785E4 |          | 1.2 |
| 205           | 454        | <a href="#">XP_034285002.1</a>  | 120.88 | 2            | 0               | 0               | 0               | 0               | 0               | 2               | 0               |          | 1.0785E4 |          | 1.2 |
| 205           | 456        | <a href="#">XP_034285001.1</a>  | 120.88 | 2            | 0               | 0               | 0               | 0               | 0               | 2               | 0               |          | 1.0785E4 |          | 1.2 |
| 205           | 453        | <a href="#">XP_034285000.1</a>  | 120.88 | 2            | 0               | 0               | 0               | 0               | 0               | 2               | 0               |          | 1.0785E4 |          | 1.2 |
| 228           | 988        | <a href="#">JAG67762.1</a>      | 120.52 | 20           | 0               | 0               | 0               | 0               | 0               | 0               | 20              |          |          |          |     |
| 228           | 989        | <a href="#">JAG67761.1</a>      | 120.52 | 20           | 0               | 0               | 0               | 0               | 0               | 0               | 20              |          |          |          |     |
| 212           | 928        | <a href="#">XP_015679695.1</a>  | 120.08 | 11           | 5               | 0               | 0               | 6               | 6               | 6               | 0               | 2.0856E5 |          |          | 1.0 |
| 128           | 722        | <a href="#">ADP88559.1</a>      | 117.89 | 11           | 3               | 3               | 3               | 8               | 0               | 3               | 8               |          |          |          | 1.0 |

| Protein Group | Protein ID | Accession                      | -10lgP | Coverage (%) | Coverage (%) F1 | Coverage (%) F2 | Coverage (%) F3 | Coverage (%) F4 | Coverage (%) F5 | Coverage (%) F6 | Coverage (%) F7 | Area F1  | Area F2  | Area F3  | A   |
|---------------|------------|--------------------------------|--------|--------------|-----------------|-----------------|-----------------|-----------------|-----------------|-----------------|-----------------|----------|----------|----------|-----|
| 128           | 723        | <a href="#">E5L0E3.1</a>       | 117.89 | 11           | 3               | 3               | 3               | 8               | 0               | 3               | 8               |          |          |          | 1.6 |
| 193           | 914        | <a href="#">P0DJL5.1</a>       | 116.25 | 22           | 0               | 0               | 7               | 0               | 7               | 6               | 22              |          |          | 1.1179E5 |     |
| 193           | 921        | <a href="#">AMB36341.1</a>     | 116.25 | 18           | 0               | 0               | 6               | 0               | 6               | 5               | 18              |          |          | 1.1179E5 |     |
| 92            | 69869      | <a href="#">TRINITY_DN554</a>  | 114.68 | 20           | 0               | 7               | 7               | 12              | 12              | 20              | 20              |          | 9.8869E4 | 8.6025E5 | 1.4 |
| 92            | 69870      | <a href="#">TRINITY_DN554</a>  | 114.68 | 24           | 0               | 9               | 9               | 15              | 15              | 24              | 24              |          | 9.8869E4 | 8.6025E5 | 1.4 |
| 210           | 621        | <a href="#">XP_015666085.1</a> | 114.12 | 8            | 5               | 3               | 3               | 3               | 0               | 0               | 0               | 3.4283E5 | 1.3335E5 | 8.9043E4 | 1.0 |
| 210           | 622        | <a href="#">XP_015666086.1</a> | 114.12 | 8            | 5               | 3               | 3               | 3               | 0               | 0               | 0               | 3.4283E5 | 1.3335E5 | 8.9043E4 | 1.0 |
| 210           | 615        | <a href="#">XP_034258446.1</a> | 114.12 | 8            | 5               | 3               | 3               | 3               | 0               | 0               | 0               | 3.4283E5 | 1.3335E5 | 8.9043E4 | 1.0 |
| 210           | 616        | <a href="#">XP_034258445.1</a> | 114.12 | 8            | 5               | 3               | 3               | 3               | 0               | 0               | 0               | 3.4283E5 | 1.3335E5 | 8.9043E4 | 1.0 |
| 210           | 617        | <a href="#">XP_034258444.1</a> | 114.12 | 8            | 5               | 3               | 3               | 3               | 0               | 0               | 0               | 3.4283E5 | 1.3335E5 | 8.9043E4 | 1.0 |
| 210           | 610        | <a href="#">XP_032092626.1</a> | 114.12 | 8            | 5               | 3               | 3               | 3               | 0               | 0               | 0               | 3.4283E5 | 1.3335E5 | 8.9043E4 | 1.0 |
| 210           | 611        | <a href="#">XP_032092625.1</a> | 114.12 | 8            | 5               | 3               | 3               | 3               | 0               | 0               | 0               | 3.4283E5 | 1.3335E5 | 8.9043E4 | 1.0 |
| 210           | 612        | <a href="#">XP_032092628.1</a> | 114.12 | 8            | 5               | 3               | 3               | 3               | 0               | 0               | 0               | 3.4283E5 | 1.3335E5 | 8.9043E4 | 1.0 |
| 210           | 613        | <a href="#">XP_013922774.1</a> | 114.12 | 8            | 5               | 3               | 3               | 3               | 0               | 0               | 0               | 3.4283E5 | 1.3335E5 | 8.9043E4 | 1.0 |
| 210           | 614        | <a href="#">XP_032092627.1</a> | 114.12 | 8            | 5               | 3               | 3               | 3               | 0               | 0               | 0               | 3.4283E5 | 1.3335E5 | 8.9043E4 | 1.0 |
| 210           | 623        | <a href="#">JAV50864.1</a>     | 114.12 | 8            | 5               | 3               | 3               | 3               | 0               | 0               | 0               | 3.4283E5 | 1.3335E5 | 8.9043E4 | 1.0 |
| 210           | 624        | <a href="#">JAI13760.1</a>     | 114.12 | 8            | 5               | 3               | 3               | 3               | 0               | 0               | 0               | 3.4283E5 | 1.3335E5 | 8.9043E4 | 1.0 |
| 210           | 625        | <a href="#">AFI49766.1</a>     | 114.12 | 8            | 5               | 3               | 3               | 3               | 0               | 0               | 0               | 3.4283E5 | 1.3335E5 | 8.9043E4 | 1.0 |
| 210           | 604        | <a href="#">JAG47096.1</a>     | 114.12 | 8            | 5               | 3               | 3               | 3               | 0               | 0               | 0               | 3.4283E5 | 1.3335E5 | 8.9043E4 | 1.0 |
| 210           | 626        | <a href="#">TRINITY_DN8397</a> | 114.12 | 8            | 5               | 3               | 3               | 3               | 0               | 0               | 0               | 3.4283E5 | 1.3335E5 | 8.9043E4 | 1.0 |
| 210           | 609        | <a href="#">ETE69371.1</a>     | 114.12 | 9            | 6               | 3               | 3               | 3               | 0               | 0               | 0               | 3.4283E5 | 1.3335E5 | 8.9043E4 | 1.0 |
| 210           | 710        | <a href="#">XP_026529384.1</a> | 114.12 | 8            | 5               | 3               | 3               | 3               | 0               | 0               | 0               | 3.4283E5 | 1.3335E5 | 8.9043E4 | 1.0 |
| 210           | 725        | <a href="#">XP_026563995.1</a> | 114.12 | 8            | 5               | 3               | 3               | 3               | 0               | 0               | 0               | 3.4283E5 | 1.3335E5 | 8.9043E4 | 1.0 |
| 88            | 2092       | <a href="#">P86497.1</a>       | 114.04 | 15           | 0               | 15              | 15              | 15              | 0               | 0               | 0               |          | 1.4585E7 | 4.8687E7 | 1.4 |
| 269           | 949        | <a href="#">JAG46182.1</a>     | 109.91 | 6            | 0               | 6               | 0               | 0               | 0               | 0               | 0               |          | 1.1978E5 |          |     |
| 269           | 950        | <a href="#">XP_015674504.1</a> | 109.91 | 6            | 0               | 6               | 0               | 0               | 0               | 0               | 0               |          | 1.1978E5 |          |     |
| 269           | 951        | <a href="#">JAG43702.1</a>     | 109.91 | 6            | 0               | 6               | 0               | 0               | 0               | 0               | 0               |          | 1.1978E5 |          |     |
| 269           | 952        | <a href="#">JAA96331.1</a>     | 109.91 | 6            | 0               | 6               | 0               | 0               | 0               | 0               | 0               |          | 1.1978E5 |          |     |
| 269           | 953        | <a href="#">XP_015674505.1</a> | 109.91 | 6            | 0               | 6               | 0               | 0               | 0               | 0               | 0               |          | 1.1978E5 |          |     |
| 269           | 954        | <a href="#">JAV49839.1</a>     | 109.91 | 6            | 0               | 6               | 0               | 0               | 0               | 0               | 0               |          | 1.1978E5 |          |     |
| 269           | 69874      | <a href="#">TRINITY_DN3815</a> | 109.91 | 6            | 0               | 6               | 0               | 0               | 0               | 0               | 0               |          | 1.1978E5 |          |     |

total 523 p

8/2/22, 12:12 PM

proteins

| Protein Group | Protein ID | Accession                       | -10lgP    | Coverage (%) | Coverage (%) F1 | Coverage (%) F2 | Coverage (%) F3 | Coverage (%) F4 | Coverage (%) F5 | Coverage (%) F6 | Coverage (%) F7 | Area F1  | Area F2  | Area F3  | A   |
|---------------|------------|---------------------------------|-----------|--------------|-----------------|-----------------|-----------------|-----------------|-----------------|-----------------|-----------------|----------|----------|----------|-----|
| 269           | 69874      | <a href="#">TRINITY_DN3815</a>  | 109.91 6  | 0            | 6               | 0               | 0               | 0               | 0               | 0               | 0               |          | 1.1978E5 |          |     |
| 269           | 69874      | <a href="#">TRINITY_DN3815</a>  | 109.91 6  | 0            | 6               | 0               | 0               | 0               | 0               | 0               | 0               |          | 1.1978E5 |          |     |
| 269           | 69874      | <a href="#">TRINITY_DN3815</a>  | 109.91 6  | 0            | 6               | 0               | 0               | 0               | 0               | 0               | 0               |          | 1.1978E5 |          |     |
| 269           | 69874      | <a href="#">TRINITY_DN3815</a>  | 109.91 6  | 0            | 6               | 0               | 0               | 0               | 0               | 0               | 0               |          | 1.1978E5 |          |     |
| 256           | 684        | <a href="#">TRINITY_DN28984</a> | 109.74 2  | 0            | 0               | 0               | 0               | 0               | 0               | 0               | 2               |          |          |          |     |
| 256           | 69854      | <a href="#">TRINITY_DN28984</a> | 109.74 2  | 0            | 0               | 0               | 0               | 0               | 0               | 0               | 2               |          |          |          |     |
| 280           | 832        | <a href="#">JAV50910.1</a>      | 109.42 12 | 0            | 0               | 0               | 12              | 0               | 0               | 0               | 0               |          |          |          | 5.3 |
| 280           | 833        | <a href="#">JAI10138.1</a>      | 109.42 12 | 0            | 0               | 0               | 12              | 0               | 0               | 0               | 0               |          |          |          | 5.3 |
| 280           | 834        | <a href="#">JAB54484.1</a>      | 109.42 12 | 0            | 0               | 0               | 12              | 0               | 0               | 0               | 0               |          |          |          | 5.3 |
| 280           | 835        | <a href="#">XP_026541233.1</a>  | 109.42 12 | 0            | 0               | 0               | 12              | 0               | 0               | 0               | 0               |          |          |          | 5.3 |
| 280           | 836        | <a href="#">XP_026576189.1</a>  | 109.42 12 | 0            | 0               | 0               | 12              | 0               | 0               | 0               | 0               |          |          |          | 5.3 |
| 280           | 837        | <a href="#">LAB45561.1</a>      | 109.42 11 | 0            | 0               | 0               | 11              | 0               | 0               | 0               | 0               |          |          |          | 5.3 |
| 280           | 69868      | <a href="#">TRINITY_DN178</a>   | 109.42 9  | 0            | 0               | 0               | 9               | 0               | 0               | 0               | 0               |          |          |          | 5.3 |
| 280           | 1039       | <a href="#">LAB63521.1</a>      | 109.42 12 | 0            | 0               | 0               | 12              | 0               | 0               | 0               | 0               |          |          |          | 5.3 |
| 280           | 1040       | <a href="#">JAG68347.1</a>      | 109.42 12 | 0            | 0               | 0               | 12              | 0               | 0               | 0               | 0               |          |          |          | 5.3 |
| 280           | 1041       | <a href="#">ETE58466.1</a>      | 109.42 10 | 0            | 0               | 0               | 10              | 0               | 0               | 0               | 0               |          |          |          | 5.3 |
| 258           | 69851      | <a href="#">TRINITY_DN7999</a>  | 108.70 7  | 0            | 0               | 0               | 0               | 0               | 0               | 0               | 7               |          |          |          |     |
| 240           | 498        | <a href="#">JAV50725.1</a>      | 105.94 6  | 0            | 0               | 2               | 0               | 0               | 0               | 0               | 4               |          |          | 9.5286E4 |     |
| 127           | 1155       | <a href="#">ADP88560.1</a>      | 105.88 10 | 10           | 10              | 4               | 4               | 6               | 4               | 6               | 6               | 3.9743E5 | 3.772E5  |          |     |
| 127           | 1156       | <a href="#">E5L0E4.1</a>        | 105.88 10 | 10           | 10              | 4               | 4               | 6               | 4               | 6               | 6               | 3.9743E5 | 3.772E5  |          |     |
| 262           | 695        | <a href="#">XP_026535564.1</a>  | 105.27 3  | 0            | 0               | 0               | 0               | 0               | 0               | 0               | 3               |          |          |          |     |
| 262           | 696        | <a href="#">XP_026535563.1</a>  | 105.27 3  | 0            | 0               | 0               | 0               | 0               | 0               | 0               | 3               |          |          |          |     |
| 262           | 655        | <a href="#">XP_013918193.1</a>  | 105.27 3  | 0            | 0               | 0               | 0               | 0               | 0               | 0               | 3               |          |          |          |     |
| 262           | 598        | <a href="#">XP_034271810.1</a>  | 105.27 3  | 0            | 0               | 0               | 0               | 0               | 0               | 0               | 3               |          |          |          |     |
| 262           | 705        | <a href="#">XP_013918195.1</a>  | 105.27 3  | 0            | 0               | 0               | 0               | 0               | 0               | 0               | 3               |          |          |          |     |
| 262           | 678        | <a href="#">XP_013918194.1</a>  | 105.27 3  | 0            | 0               | 0               | 0               | 0               | 0               | 0               | 3               |          |          |          |     |
| 262           | 637        | <a href="#">XP_034271811.1</a>  | 105.27 3  | 0            | 0               | 0               | 0               | 0               | 0               | 0               | 3               |          |          |          |     |
| 262           | 706        | <a href="#">XP_029143180.1</a>  | 105.27 3  | 0            | 0               | 0               | 0               | 0               | 0               | 0               | 3               |          |          |          |     |
| 242           | 452        | <a href="#">JAC95757.1</a>      | 104.83 9  | 0            | 0               | 3               | 2               | 0               | 0               | 0               | 4               |          |          | 1.1168E5 | 8.8 |
| 202           | 1548       | <a href="#">ADI47590.1</a>      | 104.60 5  | 5            | 3               | 5               | 0               | 0               | 0               | 0               | 0               | 1.4223E6 | 4.9549E5 | 1.8109E6 |     |

| Protein Group | Protein ID | Accession                      | -10lgP    | Coverage (%) | Coverage (%) F1 | Coverage (%) F2 | Coverage (%) F3 | Coverage (%) F4 | Coverage (%) F5 | Coverage (%) F6 | Coverage (%) F7 | Area F1  | Area F2  | Area F3  | A   |
|---------------|------------|--------------------------------|-----------|--------------|-----------------|-----------------|-----------------|-----------------|-----------------|-----------------|-----------------|----------|----------|----------|-----|
| 110           | 1500       | <a href="#">E0Y421.1</a>       | 103.68 8  | 4            | 4               | 4               | 4               | 0               | 0               | 0               |                 | 1.8692E7 |          |          |     |
| 110           | 1501       | <a href="#">ADN04919.1</a>     | 103.68 8  | 4            | 4               | 4               | 4               | 0               | 0               | 0               |                 | 1.8692E7 |          |          |     |
| 110           | 1707       | <a href="#">QBF53413.1</a>     | 103.68 8  | 4            | 4               | 4               | 4               | 0               | 0               | 0               |                 | 1.8692E7 |          |          |     |
| 191           | 1327       | <a href="#">XP_007435739.1</a> | 103.31 4  | 2            | 2               | 2               | 4               | 2               | 2               | 2               |                 | 6.6638E5 | 2.0438E5 | 3.7003E5 | 1.4 |
| 191           | 1555       | <a href="#">XP_015672252.1</a> | 103.31 4  | 2            | 2               | 2               | 4               | 2               | 2               | 2               |                 | 6.6638E5 | 2.0438E5 | 3.7003E5 | 1.4 |
| 191           | 1528       | <a href="#">JAG44290.1</a>     | 103.31 4  | 2            | 2               | 2               | 4               | 2               | 2               | 2               |                 | 6.6638E5 | 2.0438E5 | 3.7003E5 | 1.4 |
| 191           | 69929      | <a href="#">TRINITY_DN6008</a> | 103.31 4  | 2            | 2               | 2               | 4               | 2               | 2               | 2               |                 | 6.6638E5 | 2.0438E5 | 3.7003E5 | 1.4 |
| 191           | 1538       | <a href="#">AEI50411.1</a>     | 103.31 4  | 2            | 2               | 2               | 4               | 2               | 2               | 2               |                 | 6.6638E5 | 2.0438E5 | 3.7003E5 | 1.4 |
| 192           | 70234      | <a href="#">TRINITY_DN2736</a> | 103.13 14 | 14           | 14              | 14              | 14              | 0               | 0               | 0               |                 | 1.8674E5 | 1.5622E6 | 7.1135E5 | 5.8 |
| 177           | 69888      | <a href="#">TRINITY_DN471</a>  | 102.97 11 | 11           | 11              | 11              | 11              | 11              | 0               | 0               |                 | 4.0439E6 | 6.1514E6 | 1.3556E7 | 4.8 |
| 264           | 69847      | <a href="#">TRINITY_DN1497</a> | 102.43 2  | 2            | 0               | 0               | 0               | 0               | 0               | 0               |                 | 1.3496E5 |          |          |     |
| 264           | 69848      | <a href="#">TRINITY_DN1497</a> | 102.43 3  | 3            | 0               | 0               | 0               | 0               | 0               | 0               |                 | 1.3496E5 |          |          |     |
| 238           | 639        | <a href="#">ETE68218.1</a>     | 95.05 4   | 1            | 0               | 0               | 1               | 0               | 4               | 0               |                 | 5.5682E4 |          |          | 1.1 |
| 238           | 651        | <a href="#">XP_025022318.1</a> | 95.05 4   | 1            | 0               | 0               | 1               | 0               | 4               | 0               |                 | 5.5682E4 |          |          | 1.1 |
| 238           | 656        | <a href="#">JAG67632.1</a>     | 95.05 4   | 1            | 0               | 0               | 1               | 0               | 4               | 0               |                 | 5.5682E4 |          |          | 1.1 |
| 238           | 664        | <a href="#">JAG44306.1</a>     | 95.05 4   | 1            | 0               | 0               | 1               | 0               | 4               | 0               |                 | 5.5682E4 |          |          | 1.1 |
| 238           | 665        | <a href="#">JAA96758.1</a>     | 95.05 4   | 1            | 0               | 0               | 1               | 0               | 4               | 0               |                 | 5.5682E4 |          |          | 1.1 |
| 238           | 666        | <a href="#">JAG46538.1</a>     | 95.05 4   | 1            | 0               | 0               | 1               | 0               | 4               | 0               |                 | 5.5682E4 |          |          | 1.1 |
| 238           | 676        | <a href="#">LAB43566.1</a>     | 95.05 4   | 1            | 0               | 0               | 1               | 0               | 4               | 0               |                 | 5.5682E4 |          |          | 1.1 |
| 238           | 654        | <a href="#">JAV50234.1</a>     | 95.05 4   | 1            | 0               | 0               | 1               | 0               | 4               | 0               |                 | 5.5682E4 |          |          | 1.1 |
| 238           | 657        | <a href="#">XP_026576301.1</a> | 95.05 4   | 1            | 0               | 0               | 1               | 0               | 4               | 0               |                 | 5.5682E4 |          |          | 1.1 |
| 238           | 658        | <a href="#">XP_026525656.1</a> | 95.05 4   | 1            | 0               | 0               | 1               | 0               | 4               | 0               |                 | 5.5682E4 |          |          | 1.1 |
| 238           | 659        | <a href="#">XP_026576299.1</a> | 95.05 4   | 1            | 0               | 0               | 1               | 0               | 4               | 0               |                 | 5.5682E4 |          |          | 1.1 |
| 238           | 660        | <a href="#">XP_026525655.1</a> | 95.05 4   | 1            | 0               | 0               | 1               | 0               | 4               | 0               |                 | 5.5682E4 |          |          | 1.1 |
| 238           | 661        | <a href="#">XP_026525654.1</a> | 95.05 4   | 1            | 0               | 0               | 1               | 0               | 4               | 0               |                 | 5.5682E4 |          |          | 1.1 |
| 238           | 662        | <a href="#">XP_026576298.1</a> | 95.05 4   | 1            | 0               | 0               | 1               | 0               | 4               | 0               |                 | 5.5682E4 |          |          | 1.1 |
| 238           | 663        | <a href="#">XP_013919280.1</a> | 95.05 4   | 1            | 0               | 0               | 1               | 0               | 4               | 0               |                 | 5.5682E4 |          |          | 1.1 |
| 238           | 667        | <a href="#">TRINITY_DN206</a>  | 95.05 4   | 1            | 0               | 0               | 1               | 0               | 4               | 0               |                 | 5.5682E4 |          |          | 1.1 |
| 238           | 667        | <a href="#">TRINITY_DN206</a>  | 95.05 4   | 1            | 0               | 0               | 1               | 0               | 4               | 0               |                 | 5.5682E4 |          |          | 1.1 |
| 238           | 668        | <a href="#">XP_032091066.1</a> | 95.05 4   | 1            | 0               | 0               | 1               | 0               | 4               | 0               |                 | 5.5682E4 |          |          | 1.1 |
| 238           | 669        | <a href="#">XP_032091065.1</a> | 95.05 4   | 1            | 0               | 0               | 1               | 0               | 4               | 0               |                 | 5.5682E4 |          |          | 1.1 |
| 238           | 670        | <a href="#">XP_034271617.1</a> | 95.05 4   | 1            | 0               | 0               | 1               | 0               | 4               | 0               |                 | 5.5682E4 |          |          | 1.1 |

total 523 p

| Protein Group | Protein ID | Accession                       | -10lgP | Coverage (%) | Coverage (%) F1 | Coverage (%) F2 | Coverage (%) F3 | Coverage (%) F4 | Coverage (%) F5 | Coverage (%) F6 | Coverage (%) F7 | Area F1  | Area F2  | Area F3  | A   |
|---------------|------------|---------------------------------|--------|--------------|-----------------|-----------------|-----------------|-----------------|-----------------|-----------------|-----------------|----------|----------|----------|-----|
| 238           | 671        | <a href="#">XP_034271615.1</a>  | 95.05  | 4            | 1               | 0               | 0               | 1               | 0               | 4               | 0               | 5.5682E4 |          |          | 1.1 |
| 238           | 672        | <a href="#">XP_034271618.1</a>  | 95.05  | 4            | 1               | 0               | 0               | 1               | 0               | 4               | 0               | 5.5682E4 |          |          | 1.1 |
| 238           | 673        | <a href="#">XP_034271616.1</a>  | 95.05  | 4            | 1               | 0               | 0               | 1               | 0               | 4               | 0               | 5.5682E4 |          |          | 1.1 |
| 238           | 674        | <a href="#">XP_025022317.1</a>  | 95.05  | 4            | 1               | 0               | 0               | 1               | 0               | 4               | 0               | 5.5682E4 |          |          | 1.1 |
| 238           | 675        | <a href="#">XP_007428111.1</a>  | 95.05  | 4            | 1               | 0               | 0               | 1               | 0               | 4               | 0               | 5.5682E4 |          |          | 1.1 |
| 148           | 70063      | <a href="#">TRINITY_DN459</a>   | 94.14  | 11           | 11              | 11              | 11              | 11              | 11              | 0               | 0               | 3.6789E6 | 3.4934E5 | 9.2485E5 | 6.1 |
| 148           | 70205      | <a href="#">TRINITY_DN459</a>   | 94.14  | 9            | 9               | 9               | 9               | 9               | 9               | 0               | 0               | 3.6789E6 | 3.4934E5 | 9.2485E5 | 6.1 |
| 148           | 2962       | <a href="#">TRINITY_DN3041</a>  | 94.14  | 31           | 31              | 31              | 31              | 31              | 31              | 0               | 0               | 3.6789E6 | 3.4934E5 | 9.2485E5 | 6.1 |
| 274           | 1102       | <a href="#">TRINITY_DN2</a>     | 93.78  | 5            | 0               | 0               | 2               | 3               | 0               | 0               | 0               |          |          | 7.0205E4 | 3.8 |
| 257           | 69921      | <a href="#">TRINITY_DN7999</a>  | 93.52  | 3            | 0               | 0               | 0               | 0               | 0               | 0               | 3               |          |          |          |     |
| 257           | 69922      | <a href="#">TRINITY_DN7999</a>  | 93.52  | 3            | 0               | 0               | 0               | 0               | 0               | 0               | 3               |          |          |          |     |
| 265           | 1267       | <a href="#">TRINITY_DN13494</a> | 92.73  | 7            | 0               | 7               | 0               | 0               | 0               | 0               | 0               |          | 7.3443E5 |          |     |
| 254           | 2971       | <a href="#">A8Y7PL1</a>         | 92.20  | 12           | 0               | 0               | 0               | 0               | 0               | 0               | 12              |          |          |          |     |
| 254           | 2972       | <a href="#">CAL69604.1</a>      | 92.20  | 12           | 0               | 0               | 0               | 0               | 0               | 0               | 12              |          |          |          |     |
| 254           | 2973       | <a href="#">A8Y7N6.1</a>        | 92.20  | 12           | 0               | 0               | 0               | 0               | 0               | 0               | 12              |          |          |          |     |
| 254           | 2974       | <a href="#">CAL69609.1</a>      | 92.20  | 12           | 0               | 0               | 0               | 0               | 0               | 0               | 12              |          |          |          |     |
| 254           | 2975       | <a href="#">A8Y7P5.1</a>        | 92.20  | 11           | 0               | 0               | 0               | 0               | 0               | 0               | 11              |          |          |          |     |
| 254           | 2976       | <a href="#">AFD04724.1</a>      | 92.20  | 11           | 0               | 0               | 0               | 0               | 0               | 0               | 11              |          |          |          |     |
| 254           | 2977       | <a href="#">CAL69613.1</a>      | 92.20  | 11           | 0               | 0               | 0               | 0               | 0               | 0               | 11              |          |          |          |     |
| 254           | 2978       | <a href="#">A8Y7N7.1</a>        | 92.20  | 11           | 0               | 0               | 0               | 0               | 0               | 0               | 11              |          |          |          |     |
| 254           | 2979       | <a href="#">CAL69605.1</a>      | 92.20  | 11           | 0               | 0               | 0               | 0               | 0               | 0               | 11              |          |          |          |     |
| 233           | 69924      | <a href="#">TRINITY_DN960</a>   | 90.47  | 8            | 0               | 0               | 0               | 0               | 8               | 4               | 0               |          |          |          |     |
| 233           | 69925      | <a href="#">TRINITY_DN960</a>   | 90.47  | 7            | 0               | 0               | 0               | 0               | 7               | 3               | 0               |          |          |          |     |
| 233           | 69926      | <a href="#">TRINITY_DN960</a>   | 90.47  | 6            | 0               | 0               | 0               | 0               | 6               | 3               | 0               |          |          |          |     |

8/2/22, 12:12 PM

proteins

| Protein Group | Protein ID | Accession                     | -10lgP | Coverage (%) | Coverage (%) F1 | Coverage (%) F2 | Coverage (%) F3 | Coverage (%) F4 | Coverage (%) F5 | Coverage (%) F6 | Coverage (%) F7 | Area F1  | Area F2  | Area F3 | A   |
|---------------|------------|-------------------------------|--------|--------------|-----------------|-----------------|-----------------|-----------------|-----------------|-----------------|-----------------|----------|----------|---------|-----|
| 233           | 69927      | <a href="#">TRINITY_DN960</a> | 90.47  | 5            | 0               | 0               | 0               | 0               | 5               | 3               | 0               |          |          |         |     |
| 233           | 69956      | <a href="#">TRINITY_DN960</a> | 90.47  | 7            | 0               | 0               | 0               | 0               | 7               | 3               | 0               |          |          |         |     |
| 233           | 69957      | <a href="#">TRINITY_DN960</a> | 90.47  | 6            | 0               | 0               | 0               | 0               | 6               | 3               | 0               |          |          |         |     |
| 233           | 69958      | <a href="#">TRINITY_DN960</a> | 90.47  | 6            | 0               | 0               | 0               | 0               | 6               | 3               | 0               |          |          |         |     |
| 244           | 69895      | <a href="#">TRINITY_DN672</a> | 89.92  | 5            | 0               | 0               | 0               | 0               | 0               | 0               | 5               |          |          |         |     |
| 275           | 1984       | <a href="#">IQQS</a>          | 89.80  | 14           | 0               | 0               | 0               | 0               | 0               | 0               | 14              |          |          |         |     |
| 275           | 1984       | <a href="#">IQQS</a>          | 89.80  | 14           | 0               | 0               | 0               | 0               | 0               | 0               | 14              |          |          |         |     |
| 275           | 1984       | <a href="#">IQQS</a>          | 89.80  | 14           | 0               | 0               | 0               | 0               | 0               | 0               | 14              |          |          |         |     |
| 275           | 1984       | <a href="#">IQQS</a>          | 89.80  | 14           | 0               | 0               | 0               | 0               | 0               | 0               | 14              |          |          |         |     |
| 275           | 1986       | <a href="#">CAA48456.1</a>    | 89.80  | 12           | 0               | 0               | 0               | 0               | 0               | 0               | 12              |          |          |         |     |
| 275           | 1987       | <a href="#">AAZ53185.1</a>    | 89.80  | 12           | 0               | 0               | 0               | 0               | 0               | 0               | 12              |          |          |         |     |
| 275           | 1988       | <a href="#">Q02471.1</a>      | 89.80  | 12           | 0               | 0               | 0               | 0               | 0               | 0               | 12              |          |          |         |     |
| 275           | 1989       | <a href="#">S29298</a>        | 89.80  | 12           | 0               | 0               | 0               | 0               | 0               | 0               | 12              |          |          |         |     |
| 275           | 1990       | <a href="#">ACD43467.1</a>    | 89.80  | 12           | 0               | 0               | 0               | 0               | 0               | 0               | 12              |          |          |         |     |
| 275           | 1991       | <a href="#">ACD43465.1</a>    | 89.80  | 12           | 0               | 0               | 0               | 0               | 0               | 0               | 12              |          |          |         |     |
| 203           | 1737       | <a href="#">AFD04723.1</a>    | 87.78  | 11           | 0               | 0               | 0               | 10              | 10              | 10              | 11              |          |          |         | 8.1 |
| 203           | 1738       | <a href="#">AFB74191.1</a>    | 87.78  | 11           | 0               | 0               | 0               | 10              | 10              | 10              | 11              |          |          |         | 8.1 |
| 203           | 1739       | <a href="#">A8Y7N4.1</a>      | 87.78  | 11           | 0               | 0               | 0               | 10              | 10              | 10              | 11              |          |          |         | 8.1 |
| 203           | 1740       | <a href="#">H6VC05.1</a>      | 87.78  | 11           | 0               | 0               | 0               | 10              | 10              | 10              | 11              |          |          |         | 8.1 |
| 203           | 1741       | <a href="#">CAL69602.1</a>    | 87.78  | 11           | 0               | 0               | 0               | 10              | 10              | 10              | 11              |          |          |         | 8.1 |
| 207           | 1970       | <a href="#">ABD24041.1</a>    | 86.71  | 26           | 26              | 13              | 0               | 0               | 0               | 0               | 11              | 3.3819E5 | 1.6087E5 |         |     |
| 207           | 1971       | <a href="#">Q2ES49.1</a>      | 86.71  | 26           | 26              | 13              | 0               | 0               | 0               | 0               | 11              | 3.3819E5 | 1.6087E5 |         |     |
| 255           | 842        | <a href="#">TRINITY_DN157</a> | 86.44  | 13           | 0               | 0               | 0               | 0               | 0               | 0               | 13              |          |          |         |     |
| 213           | 1995       | <a href="#">AAB36402.1</a>    | 85.29  | 13           | 0               | 0               | 0               | 0               | 0               | 0               | 13              |          |          |         |     |

| Protein Group | Protein ID | Accession                      | -10lgP | Coverage (%) | Coverage (%) F1 | Coverage (%) F2 | Coverage (%) F3 | Coverage (%) F4 | Coverage (%) F5 | Coverage (%) F6 | Coverage (%) F7 | Area F1 | Area F2  | Area F3 | A   |
|---------------|------------|--------------------------------|--------|--------------|-----------------|-----------------|-----------------|-----------------|-----------------|-----------------|-----------------|---------|----------|---------|-----|
| 213           | 1996       | <a href="#">Q9PSM8.1</a>       | 85.29  | 13           | 0               | 0               | 0               | 0               | 0               | 0               | 13              |         |          |         |     |
| 284           | 1099       | <a href="#">XP_029141923.1</a> | 81.62  | 7            | 0               | 0               | 0               | 0               | 0               | 0               | 7               |         |          |         |     |
| 267           | 69887      | <a href="#">TRINITY_DN1424</a> | 81.20  | 5            | 0               | 0               | 0               | 0               | 5               | 0               | 5               |         |          |         |     |
| 215           | 997        | <a href="#">ART88739.1</a>     | 79.86  | 7            | 0               | 4               | 3               | 0               | 0               | 0               | 0               |         | 1.254E5  |         |     |
| 296           | 69884      | <a href="#">TRINITY_DN1526</a> | 79.05  | 7            | 0               | 0               | 0               | 0               | 0               | 0               | 7               |         |          |         |     |
| 296           | 69885      | <a href="#">TRINITY_DN1526</a> | 79.05  | 6            | 0               | 0               | 0               | 0               | 0               | 0               | 6               |         |          |         |     |
| 296           | 69886      | <a href="#">TRINITY_DN1526</a> | 79.05  | 5            | 0               | 0               | 0               | 0               | 0               | 0               | 5               |         |          |         |     |
| 236           | 70327      | <a href="#">TRINITY_DN2452</a> | 77.88  | 9            | 0               | 8               | 0               | 8               | 9               | 8               | 0               |         | 3.2643E4 |         | 4.1 |
| 187           | 3019       | <a href="#">P00990.1</a>       | 76.97  | 17           | 0               | 0               | 15              | 15              | 15              | 15              | 17              |         |          | 4.065E5 | 8.0 |
| 187           | 3020       | <a href="#">TIVRV2</a>         | 76.97  | 17           | 0               | 0               | 15              | 15              | 15              | 15              | 17              |         |          | 4.065E5 | 8.0 |
| 187           | 3028       | <a href="#">CAL69611.1</a>     | 76.97  | 12           | 0               | 0               | 11              | 11              | 11              | 11              | 12              |         |          | 4.065E5 | 8.0 |
| 187           | 3029       | <a href="#">A8Y7P3.1</a>       | 76.97  | 12           | 0               | 0               | 11              | 11              | 11              | 11              | 12              |         |          | 4.065E5 | 8.0 |
| 187           | 2948       | <a href="#">CAL69610.1</a>     | 76.97  | 12           | 0               | 0               | 11              | 11              | 11              | 11              | 12              |         |          | 4.065E5 | 8.0 |
| 187           | 2949       | <a href="#">A8Y7P2.1</a>       | 76.97  | 12           | 0               | 0               | 11              | 11              | 11              | 11              | 12              |         |          | 4.065E5 | 8.0 |
| 187           | 3030       | <a href="#">CAL69615.1</a>     | 76.97  | 12           | 0               | 0               | 11              | 11              | 11              | 11              | 12              |         |          | 4.065E5 | 8.0 |
| 187           | 3031       | <a href="#">AFE83617.1</a>     | 76.97  | 12           | 0               | 0               | 11              | 11              | 11              | 11              | 12              |         |          | 4.065E5 | 8.0 |
| 187           | 3032       | <a href="#">A8Y7P4.1</a>       | 76.97  | 12           | 0               | 0               | 11              | 11              | 11              | 11              | 12              |         |          | 4.065E5 | 8.0 |
| 187           | 3033       | <a href="#">AFE83616.1</a>     | 76.97  | 12           | 0               | 0               | 11              | 11              | 11              | 11              | 12              |         |          | 4.065E5 | 8.0 |
| 187           | 3034       | <a href="#">AFB74192.1</a>     | 76.97  | 12           | 0               | 0               | 11              | 11              | 11              | 11              | 12              |         |          | 4.065E5 | 8.0 |
| 187           | 3035       | <a href="#">CAL69614.1</a>     | 76.97  | 12           | 0               | 0               | 11              | 11              | 11              | 11              | 12              |         |          | 4.065E5 | 8.0 |
| 187           | 3036       | <a href="#">A8Y7P6.1</a>       | 76.97  | 12           | 0               | 0               | 11              | 11              | 11              | 11              | 12              |         |          | 4.065E5 | 8.0 |
| 187           | 3037       | <a href="#">A8Y7N5.1</a>       | 76.97  | 12           | 0               | 0               | 11              | 11              | 11              | 11              | 12              |         |          | 4.065E5 | 8.0 |
| 187           | 3038       | <a href="#">CAL69608.1</a>     | 76.97  | 12           | 0               | 0               | 11              | 11              | 11              | 11              | 12              |         |          | 4.065E5 | 8.0 |
| 187           | 3039       | <a href="#">ABD24040.1</a>     | 76.97  | 12           | 0               | 0               | 11              | 11              | 11              | 11              | 12              |         |          | 4.065E5 | 8.0 |
| 187           | 3040       | <a href="#">CAL69612.1</a>     | 76.97  | 12           | 0               | 0               | 11              | 11              | 11              | 11              | 12              |         |          | 4.065E5 | 8.0 |

total 523 p

| Protein Group | Protein ID | Accession                       | -10lgP | Coverage (%) | Coverage (%) F1 | Coverage (%) F2 | Coverage (%) F3 | Coverage (%) F4 | Coverage (%) F5 | Coverage (%) F6 | Coverage (%) F7 | Area F1  | Area F2  | Area F3  | A   |
|---------------|------------|---------------------------------|--------|--------------|-----------------|-----------------|-----------------|-----------------|-----------------|-----------------|-----------------|----------|----------|----------|-----|
| 187           | 3041       | <a href="#">A8Y7P0.1</a>        | 76.97  | 12           | 0               | 0               | 11              | 11              | 11              | 11              | 12              |          |          | 4.065E5  | 8.0 |
| 187           | 3042       | <a href="#">AFE83615.1</a>      | 76.97  | 12           | 0               | 0               | 11              | 11              | 11              | 11              | 12              |          |          | 4.065E5  | 8.0 |
| 187           | 3043       | <a href="#">Q2ES50.1</a>        | 76.97  | 12           | 0               | 0               | 11              | 11              | 11              | 11              | 12              |          |          | 4.065E5  | 8.0 |
| 187           | 3044       | <a href="#">CAL69603.1</a>      | 76.97  | 12           | 0               | 0               | 11              | 11              | 11              | 11              | 12              |          |          | 4.065E5  | 8.0 |
| 187           | 3045       | <a href="#">H6VC06.1</a>        | 76.97  | 12           | 0               | 0               | 11              | 11              | 11              | 11              | 12              |          |          | 4.065E5  | 8.0 |
| 307           | 70026      | <a href="#">TRINITY_DN5102</a>  | 76.41  | 3            | 0               | 3               | 0               | 0               | 0               | 0               | 0               |          | 8.6583E4 |          |     |
| 229           | 1035       | <a href="#">CAE47141.1</a>      | 75.31  | 12           | 0               | 0               | 0               | 0               | 0               | 0               | 12              |          |          |          |     |
| 252           | 955        | <a href="#">ABB76279.1</a>      | 73.14  | 9            | 0               | 0               | 0               | 9               | 0               | 0               | 0               |          |          |          | 7.1 |
| 230           | 1518       | <a href="#">ADI47595.1</a>      | 73.04  | 6            | 6               | 0               | 0               | 0               | 0               | 0               | 0               | 4.3022E6 |          |          |     |
| 230           | 1676       | <a href="#">ADI47604.1</a>      | 73.04  | 6            | 6               | 0               | 0               | 0               | 0               | 0               | 0               | 4.3022E6 |          |          |     |
| 297           | 69935      | <a href="#">TRINITY_DN722</a>   | 72.61  | 3            | 0               | 3               | 0               | 0               | 0               | 0               | 0               |          | 3.0191E5 |          |     |
| 297           | 70165      | <a href="#">TRINITY_DN722</a>   | 72.61  | 11           | 0               | 11              | 0               | 0               | 0               | 0               | 0               |          | 3.0191E5 |          |     |
| 297           | 70166      | <a href="#">TRINITY_DN722</a>   | 72.61  | 9            | 0               | 9               | 0               | 0               | 0               | 0               | 0               |          | 3.0191E5 |          |     |
| 261           | 1482       | <a href="#">TRINITY_DN86540</a> | 70.73  | 11           | 0               | 0               | 0               | 0               | 4               | 0               | 11              |          |          |          |     |
| 261           | 1972       | <a href="#">P0C0U6.1</a>        | 70.73  | 16           | 0               | 0               | 0               | 0               | 6               | 0               | 16              |          |          |          |     |
| 261           | 1973       | <a href="#">XP_026532450.1</a>  | 70.73  | 15           | 0               | 0               | 0               | 0               | 6               | 0               | 15              |          |          |          |     |
| 261           | 1974       | <a href="#">XP_026570824.1</a>  | 70.73  | 15           | 0               | 0               | 0               | 0               | 6               | 0               | 15              |          |          |          |     |
| 261           | 1975       | <a href="#">XP_034284997.1</a>  | 70.73  | 15           | 0               | 0               | 0               | 0               | 6               | 0               | 15              |          |          |          |     |
| 261           | 1976       | <a href="#">XP_032079120.1</a>  | 70.73  | 15           | 0               | 0               | 0               | 0               | 6               | 0               | 15              |          |          |          |     |
| 261           | 1977       | <a href="#">JAC95434.1</a>      | 70.73  | 15           | 0               | 0               | 0               | 0               | 6               | 0               | 15              |          |          |          |     |
| 261           | 1978       | <a href="#">LAA66838.1</a>      | 70.73  | 14           | 0               | 0               | 0               | 0               | 6               | 0               | 14              |          |          |          |     |
| 290           | 1384       | <a href="#">XP_029140879.1</a>  | 70.10  | 0            | 0               | 0               | 0               | 0               | 0               | 0               | 0               |          |          |          |     |
| 248           | 1817       | <a href="#">AJO70722.1</a>      | 68.21  | 6            | 0               | 0               | 0               | 0               | 0               | 0               | 6               |          |          |          |     |
| 343           | 2091       | <a href="#">XP_029142225.1</a>  | 64.45  | 1            | 0               | 0               | 1               | 0               | 0               | 0               | 0               |          |          | 9.5811E4 |     |
| 343           | 2123       | <a href="#">XP_015677107.1</a>  | 64.45  | 3            | 0               | 0               | 3               | 0               | 0               | 0               | 0               |          |          | 9.5811E4 |     |
| 343           | 70209      | <a href="#">TRINITY_DN1914</a>  | 64.45  | 3            | 0               | 0               | 3               | 0               | 0               | 0               | 0               |          |          | 9.5811E4 |     |
| 403           | 2994       | <a href="#">TRINITY_DN1889</a>  | 63.54  | 8            | 0               | 0               | 0               | 0               | 0               | 0               | 8               |          |          |          |     |
| 200           | 3016       | <a href="#">CCH15044.1</a>      | 63.13  | 9            | 9               | 9               | 9               | 9               | 9               | 9               | 9               | 8.2206E5 | 5.5535E5 | 2.9889E6 | 2.3 |

total 523 p

| Protein Group | Protein ID | Accession                     | -10lgP | Coverage (%) | Coverage (%) F1 | Coverage (%) F2 | Coverage (%) F3 | Coverage (%) F4 | Coverage (%) F5 | Coverage (%) F6 | Coverage (%) F7 | Area F1  | Area F2  | Area F3  | A   |
|---------------|------------|-------------------------------|--------|--------------|-----------------|-----------------|-----------------|-----------------|-----------------|-----------------|-----------------|----------|----------|----------|-----|
| 200           | 3017       | <a href="#">I2G9B4.1</a>      | 63.13  | 9            | 9               | 9               | 9               | 9               | 9               | 9               | 9               | 8.2206E5 | 5.5535E5 | 2.9889E6 | 2.3 |
| 200           | 3010       | <a href="#">AMH40736.1</a>    | 63.13  | 10           | 10              | 10              | 10              | 10              | 10              | 10              | 10              | 8.2206E5 | 5.5535E5 | 2.9889E6 | 2.3 |
| 200           | 3011       | <a href="#">AMH40741.1</a>    | 63.13  | 10           | 10              | 10              | 10              | 10              | 10              | 10              | 10              | 8.2206E5 | 5.5535E5 | 2.9889E6 | 2.3 |
| 200           | 3012       | <a href="#">P00991.2</a>      | 63.13  | 10           | 10              | 10              | 10              | 10              | 10              | 10              | 10              | 8.2206E5 | 5.5535E5 | 2.9889E6 | 2.3 |
| 200           | 3013       | <a href="#">AAP04484.1</a>    | 63.13  | 10           | 10              | 10              | 10              | 10              | 10              | 10              | 10              | 8.2206E5 | 5.5535E5 | 2.9889E6 | 2.3 |
| 200           | 2915       | <a href="#">AAP04485.1</a>    | 63.13  | 10           | 10              | 10              | 10              | 10              | 10              | 10              | 10              | 8.2206E5 | 5.5535E5 | 2.9889E6 | 2.3 |
| 200           | 2916       | <a href="#">P00992.2</a>      | 63.13  | 10           | 10              | 10              | 10              | 10              | 10              | 10              | 10              | 8.2206E5 | 5.5535E5 | 2.9889E6 | 2.3 |
| 200           | 2917       | <a href="#">AMH40733.1</a>    | 63.13  | 10           | 10              | 10              | 10              | 10              | 10              | 10              | 10              | 8.2206E5 | 5.5535E5 | 2.9889E6 | 2.3 |
| 200           | 2918       | <a href="#">AMH40738.1</a>    | 63.13  | 10           | 10              | 10              | 10              | 10              | 10              | 10              | 10              | 8.2206E5 | 5.5535E5 | 2.9889E6 | 2.3 |
| 200           | 2919       | <a href="#">AMH40740.1</a>    | 63.13  | 10           | 10              | 10              | 10              | 10              | 10              | 10              | 10              | 8.2206E5 | 5.5535E5 | 2.9889E6 | 2.3 |
| 200           | 3014       | <a href="#">E5AJX3.1</a>      | 63.13  | 9            | 9               | 9               | 9               | 9               | 9               | 9               | 9               | 8.2206E5 | 5.5535E5 | 2.9889E6 | 2.3 |
| 200           | 3015       | <a href="#">CBW30779.1</a>    | 63.13  | 9            | 9               | 9               | 9               | 9               | 9               | 9               | 9               | 8.2206E5 | 5.5535E5 | 2.9889E6 | 2.3 |
| 200           | 70321      | <a href="#">TRINITY_DN151</a> | 63.13  | 8            | 8               | 8               | 8               | 8               | 8               | 8               | 8               | 8.2206E5 | 5.5535E5 | 2.9889E6 | 2.3 |
| 200           | 3047       | <a href="#">Q6T269.1</a>      | 63.13  | 6            | 6               | 6               | 6               | 6               | 6               | 6               | 6               | 8.2206E5 | 5.5535E5 | 2.9889E6 | 2.3 |
| 200           | 3048       | <a href="#">AAR19275.1</a>    | 63.13  | 6            | 6               | 6               | 6               | 6               | 6               | 6               | 6               | 8.2206E5 | 5.5535E5 | 2.9889E6 | 2.3 |
| 245           | 1804       | <a href="#">LAA93895.1</a>    | 61.86  | 5            | 5               | 0               | 0               | 5               | 5               | 5               | 5               | 2.8419E4 |          |          | 7.8 |
| 285           | 2986       | <a href="#">CAJ34939.1</a>    | 61.72  | 19           | 0               | 0               | 0               | 0               | 0               | 19              | 19              |          |          |          |     |
| 285           | 2987       | <a href="#">Q3BK14.1</a>      | 61.72  | 19           | 0               | 0               | 0               | 0               | 0               | 19              | 19              |          |          |          |     |
| 285           | 70319      | <a href="#">TRINITY_DN160</a> | 61.72  | 15           | 0               | 0               | 0               | 0               | 0               | 15              | 15              |          |          |          |     |
| 223           | 1689       | <a href="#">JAS05406.1</a>    | 60.18  | 2            | 0               | 2               | 0               | 2               | 0               | 0               | 0               | 2.6453E5 |          |          | 1.0 |
| 223           | 1667       | <a href="#">JAS05289.1</a>    | 60.18  | 2            | 0               | 2               | 0               | 2               | 0               | 0               | 0               | 2.6453E5 |          |          | 1.0 |
| 223           | 1668       | <a href="#">JAS05287.1</a>    | 60.18  | 2            | 0               | 2               | 0               | 2               | 0               | 0               | 0               | 2.6453E5 |          |          | 1.0 |
| 223           | 1669       | <a href="#">ABG26980.1</a>    | 60.18  | 2            | 0               | 2               | 0               | 2               | 0               | 0               | 0               | 2.6453E5 |          |          | 1.0 |
| 223           | 1670       | <a href="#">JAS05286.1</a>    | 60.18  | 2            | 0               | 2               | 0               | 2               | 0               | 0               | 0               | 2.6453E5 |          |          | 1.0 |
| 223           | 1671       | <a href="#">JAS05288.1</a>    | 60.18  | 2            | 0               | 2               | 0               | 2               | 0               | 0               | 0               | 2.6453E5 |          |          | 1.0 |
| 223           | 1672       | <a href="#">JAS05285.1</a>    | 60.18  | 2            | 0               | 2               | 0               | 2               | 0               | 0               | 0               | 2.6453E5 |          |          | 1.0 |
| 223           | 1734       | <a href="#">JAS05407.1</a>    | 60.18  | 2            | 0               | 2               | 0               | 2               | 0               | 0               | 0               | 2.6453E5 |          |          | 1.0 |
| 223           | 1735       | <a href="#">JAS05408.1</a>    | 60.18  | 2            | 0               | 2               | 0               | 2               | 0               | 0               | 0               | 2.6453E5 |          |          | 1.0 |
| 223           | 2063       | <a href="#">QIV64953.1</a>    | 60.18  | 4            | 0               | 4               | 0               | 4               | 0               | 0               | 0               | 2.6453E5 |          |          | 1.0 |

total 523 p

8/2/22, 12:12 PM

proteins

| Protein Group | Protein ID | Accession                       | -10lgP | Coverage (%) | Coverage (%) F1 | Coverage (%) F2 | Coverage (%) F3 | Coverage (%) F4 | Coverage (%) F5 | Coverage (%) F6 | Coverage (%) F7 | Area F1  | Area F2 | Area F3 | A   |
|---------------|------------|---------------------------------|--------|--------------|-----------------|-----------------|-----------------|-----------------|-----------------|-----------------|-----------------|----------|---------|---------|-----|
| 303           | 1894       | <a href="#">ETE57622.1</a>      | 55.32  | 3            | 0               | 0               | 0               | 0               | 0               | 0               | 3               |          |         |         |     |
| 376           | 70075      | <a href="#">XP_015672332.1</a>  | 52.38  | 2            | 2               | 0               | 0               | 0               | 0               | 0               | 0               | 7.951E4  |         |         |     |
| 374           | 2170       | <a href="#">TRINITY_DN27458</a> | 51.48  | 2            | 0               | 0               | 0               | 2               | 0               | 0               | 0               |          |         |         | 1.3 |
| 374           | 3082       | <a href="#">XP_015683432.1</a>  | 51.48  | 2            | 0               | 0               | 0               | 2               | 0               | 0               | 0               |          |         |         | 1.3 |
| 378           | 2213       | <a href="#">XP_007421015.1</a>  | 50.81  | 1            | 1               | 0               | 0               | 0               | 0               | 0               | 0               | 1.4791E5 |         |         |     |
| 378           | 70211      | <a href="#">TRINITY_DN13676</a> | 50.81  | 2            | 2               | 0               | 0               | 0               | 0               | 0               | 0               | 1.4791E5 |         |         |     |
| 378           | 70212      | <a href="#">TRINITY_DN13676</a> | 50.81  | 1            | 1               | 0               | 0               | 0               | 0               | 0               | 0               | 1.4791E5 |         |         |     |
| 378           | 70212      | <a href="#">TRINITY_DN13676</a> | 50.81  | 1            | 1               | 0               | 0               | 0               | 0               | 0               | 0               | 1.4791E5 |         |         |     |
| 378           | 70214      | <a href="#">TRINITY_DN13676</a> | 50.81  | 1            | 1               | 0               | 0               | 0               | 0               | 0               | 0               | 1.4791E5 |         |         |     |
| 378           | 70215      | <a href="#">TRINITY_DN13676</a> | 50.81  | 1            | 1               | 0               | 0               | 0               | 0               | 0               | 0               | 1.4791E5 |         |         |     |
| 378           | 2289       | <a href="#">JAV50100.1</a>      | 50.81  | 1            | 1               | 0               | 0               | 0               | 0               | 0               | 0               | 1.4791E5 |         |         |     |
| 378           | 3080       | <a href="#">LAB58574.1</a>      | 50.81  | 9            | 9               | 0               | 0               | 0               | 0               | 0               | 0               | 1.4791E5 |         |         |     |
| 378           | 2671       | <a href="#">XP_007421016.1</a>  | 50.81  | 1            | 1               | 0               | 0               | 0               | 0               | 0               | 0               | 1.4791E5 |         |         |     |
| 378           | 2545       | <a href="#">XP_026552070.1</a>  | 50.81  | 1            | 1               | 0               | 0               | 0               | 0               | 0               | 0               | 1.4791E5 |         |         |     |
| 378           | 2254       | <a href="#">JAA96625.1</a>      | 50.81  | 1            | 1               | 0               | 0               | 0               | 0               | 0               | 0               | 1.4791E5 |         |         |     |
| 378           | 2546       | <a href="#">XP_026537394.1</a>  | 50.81  | 1            | 1               | 0               | 0               | 0               | 0               | 0               | 0               | 1.4791E5 |         |         |     |
| 378           | 2255       | <a href="#">JAG44103.1</a>      | 50.81  | 1            | 1               | 0               | 0               | 0               | 0               | 0               | 0               | 1.4791E5 |         |         |     |
| 378           | 2547       | <a href="#">XP_026537257.1</a>  | 50.81  | 1            | 1               | 0               | 0               | 0               | 0               | 0               | 0               | 1.4791E5 |         |         |     |
| 378           | 2596       | <a href="#">LAB27223.1</a>      | 50.81  | 1            | 1               | 0               | 0               | 0               | 0               | 0               | 0               | 1.4791E5 |         |         |     |
| 378           | 1935       | <a href="#">XP_032065032.1</a>  | 50.81  | 1            | 1               | 0               | 0               | 0               | 0               | 0               | 0               | 1.4791E5 |         |         |     |
| 378           | 2302       | <a href="#">XP_034262785.1</a>  | 50.81  | 1            | 1               | 0               | 0               | 0               | 0               | 0               | 0               | 1.4791E5 |         |         |     |
| 378           | 1936       | <a href="#">XP_013919874.1</a>  | 50.81  | 1            | 1               | 0               | 0               | 0               | 0               | 0               | 0               | 1.4791E5 |         |         |     |
| 295           | 1454       | <a href="#">JAV49704.1</a>      | 50.02  | 2            | 0               | 0               | 0               | 0               | 0               | 0               | 2               |          |         |         |     |
| 295           | 1473       | <a href="#">JAA96208.1</a>      | 50.02  | 2            | 0               | 0               | 0               | 0               | 0               | 0               | 2               |          |         |         |     |
| 295           | 69903      | <a href="#">TRINITY_DN159</a>   | 50.02  | 2            | 0               | 0               | 0               | 0               | 0               | 0               | 2               |          |         |         |     |
| 295           | 69904      | <a href="#">TRINITY_DN159</a>   | 50.02  | 2            | 0               | 0               | 0               | 0               | 0               | 0               | 2               |          |         |         |     |
| 295           | 69905      | <a href="#">TRINITY_DN159</a>   | 50.02  | 2            | 0               | 0               | 0               | 0               | 0               | 0               | 2               |          |         |         |     |
| 295           | 1488       | <a href="#">AFJ50884.1</a>      | 50.02  | 2            | 0               | 0               | 0               | 0               | 0               | 0               | 2               |          |         |         |     |
| 295           | 1489       | <a href="#">JAI12151.1</a>      | 50.02  | 2            | 0               | 0               | 0               | 0               | 0               | 0               | 2               |          |         |         |     |
| 270           | 2182       | <a href="#">JAG67907.1</a>      | 49.83  | 2            | 0               | 0               | 0               | 2               | 0               | 2               | 0               |          |         |         | 1.3 |
| 270           | 3150       | <a href="#">TRINITY_DN3991</a>  | 49.83  | 2            | 0               | 0               | 0               | 2               | 0               | 2               | 0               |          |         |         | 1.3 |
| 298           | 2284       | <a href="#">CAJ01683.1</a>      | 48.76  | 3            | 0               | 0               | 3               | 0               | 0               | 0               | 0               |          |         | 2.178E5 |     |
| 298           | 2041       | <a href="#">ADW54336.1</a>      | 48.76  | 3            | 0               | 0               | 3               | 0               | 0               | 0               | 0               |          |         | 2.178E5 |     |

total 523 p

| Protein Group | Protein ID | Accession                      | -10lgP | Coverage (%) | Coverage (%) F1 | Coverage (%) F2 | Coverage (%) F3 | Coverage (%) F4 | Coverage (%) F5 | Coverage (%) F6 | Coverage (%) F7 | Area F1  | Area F2  | Area F3 | A   |
|---------------|------------|--------------------------------|--------|--------------|-----------------|-----------------|-----------------|-----------------|-----------------|-----------------|-----------------|----------|----------|---------|-----|
| 298           | 2225       | <a href="#">ADW54337.1</a>     | 48.76  | 4            | 0               | 0               | 4               | 0               | 0               | 0               | 0               |          |          | 2.178E5 |     |
| 298           | 2593       | <a href="#">ADW54335.1</a>     | 48.76  | 4            | 0               | 0               | 4               | 0               | 0               | 0               | 0               |          |          | 2.178E5 |     |
| 169           | 70050      | <a href="#">P86541.2</a>       | 47.76  | 13           | 13              | 13              | 0               | 13              | 13              | 13              | 13              | 1.9149E5 | 2.2353E4 |         | 3.2 |
| 169           | 2070       | <a href="#">P01440.1</a>       | 47.76  | 13           | 13              | 13              | 0               | 13              | 13              | 13              | 13              | 1.9149E5 | 2.2353E4 |         | 3.2 |
| 169           | 2071       | <a href="#">AAC61315.1</a>     | 47.76  | 13           | 13              | 13              | 0               | 13              | 13              | 13              | 13              | 1.9149E5 | 2.2353E4 |         | 3.2 |
| 169           | 2073       | <a href="#">BAU24665.1</a>     | 47.76  | 11           | 11              | 11              | 0               | 11              | 11              | 11              | 11              | 1.9149E5 | 2.2353E4 |         | 3.2 |
| 169           | 2075       | <a href="#">O93472.1</a>       | 47.76  | 10           | 10              | 10              | 0               | 10              | 10              | 10              | 10              | 1.9149E5 | 2.2353E4 |         | 3.2 |
| 169           | 2076       | <a href="#">Q9PST3.1</a>       | 47.76  | 10           | 10              | 10              | 0               | 10              | 10              | 10              | 10              | 1.9149E5 | 2.2353E4 |         | 3.2 |
| 169           | 2077       | <a href="#">AAK49439.1</a>     | 47.76  | 10           | 10              | 10              | 0               | 10              | 10              | 10              | 10              | 1.9149E5 | 2.2353E4 |         | 3.2 |
| 169           | 2078       | <a href="#">AAC27686.1</a>     | 47.76  | 10           | 10              | 10              | 0               | 10              | 10              | 10              | 10              | 1.9149E5 | 2.2353E4 |         | 3.2 |
| 169           | 2079       | <a href="#">Q9PST4.1</a>       | 47.76  | 10           | 10              | 10              | 0               | 10              | 10              | 10              | 10              | 1.9149E5 | 2.2353E4 |         | 3.2 |
| 169           | 2080       | <a href="#">AAC27687.1</a>     | 47.76  | 10           | 10              | 10              | 0               | 10              | 10              | 10              | 10              | 1.9149E5 | 2.2353E4 |         | 3.2 |
| 169           | 2081       | <a href="#">AAC27685.1</a>     | 47.76  | 10           | 10              | 10              | 0               | 10              | 10              | 10              | 10              | 1.9149E5 | 2.2353E4 |         | 3.2 |
| 283           | 2262       | <a href="#">ETE69494.1</a>     | 47.54  | 2            | 0               | 0               | 0               | 2               | 2               | 2               | 0               |          |          |         | 4.7 |
| 283           | 3123       | <a href="#">ETE65060.1</a>     | 47.54  | 7            | 0               | 0               | 0               | 7               | 7               | 7               | 0               |          |          |         | 4.7 |
| 283           | 3124       | <a href="#">XP_013915314.1</a> | 47.54  | 7            | 0               | 0               | 0               | 7               | 7               | 7               | 0               |          |          |         | 4.7 |
| 283           | 3102       | <a href="#">XP_013919189.1</a> | 47.54  | 7            | 0               | 0               | 0               | 7               | 7               | 7               | 0               |          |          |         | 4.7 |
| 283           | 3103       | <a href="#">XP_013919188.1</a> | 47.54  | 7            | 0               | 0               | 0               | 7               | 7               | 7               | 0               |          |          |         | 4.7 |
| 283           | 3104       | <a href="#">ETE65301.1</a>     | 47.54  | 7            | 0               | 0               | 0               | 7               | 7               | 7               | 0               |          |          |         | 4.7 |
| 283           | 3105       | <a href="#">JAG46644.1</a>     | 47.54  | 7            | 0               | 0               | 0               | 7               | 7               | 7               | 0               |          |          |         | 4.7 |
| 283           | 3106       | <a href="#">JAI09932.1</a>     | 47.54  | 7            | 0               | 0               | 0               | 7               | 7               | 7               | 0               |          |          |         | 4.7 |
| 283           | 70333      | <a href="#">XP_007430054.1</a> | 47.54  | 7            | 0               | 0               | 0               | 7               | 7               | 7               | 0               |          |          |         | 4.7 |
| 283           | 3107       | <a href="#">JAI13025.1</a>     | 47.54  | 7            | 0               | 0               | 0               | 7               | 7               | 7               | 0               |          |          |         | 4.7 |
| 283           | 3108       | <a href="#">AFJ50305.1</a>     | 47.54  | 7            | 0               | 0               | 0               | 7               | 7               | 7               | 0               |          |          |         | 4.7 |
| 283           | 3109       | <a href="#">JAG44453.1</a>     | 47.54  | 7            | 0               | 0               | 0               | 7               | 7               | 7               | 0               |          |          |         | 4.7 |
| 283           | 3110       | <a href="#">JAI09933.1</a>     | 47.54  | 7            | 0               | 0               | 0               | 7               | 7               | 7               | 0               |          |          |         | 4.7 |
| 283           | 3111       | <a href="#">JAG46643.1</a>     | 47.54  | 7            | 0               | 0               | 0               | 7               | 7               | 7               | 0               |          |          |         | 4.7 |
| 283           | 3112       | <a href="#">AFJ50304.1</a>     | 47.54  | 7            | 0               | 0               | 0               | 7               | 7               | 7               | 0               |          |          |         | 4.7 |
| 283           | 3113       | <a href="#">JAG67733.1</a>     | 47.54  | 7            | 0               | 0               | 0               | 7               | 7               | 7               | 0               |          |          |         | 4.7 |
| 283           | 3114       | <a href="#">JAB54108.1</a>     | 47.54  | 7            | 0               | 0               | 0               | 7               | 7               | 7               | 0               |          |          |         | 4.7 |
| 283           | 3115       | <a href="#">JAC95409.1</a>     | 47.54  | 7            | 0               | 0               | 0               | 7               | 7               | 7               | 0               |          |          |         | 4.7 |
| 283           | 3116       | <a href="#">JAI13026.1</a>     | 47.54  | 7            | 0               | 0               | 0               | 7               | 7               | 7               | 0               |          |          |         | 4.7 |
| 283           | 3117       | <a href="#">JAA96854.1</a>     | 47.54  | 7            | 0               | 0               | 0               | 7               | 7               | 7               | 0               |          |          |         | 4.7 |
| 283           | 3118       | <a href="#">JAG44452.1</a>     | 47.54  | 7            | 0               | 0               | 0               | 7               | 7               | 7               | 0               |          |          |         | 4.7 |
| 283           | 3119       | <a href="#">JAA96855.1</a>     | 47.54  | 7            | 0               | 0               | 0               | 7               | 7               | 7               | 0               |          |          |         | 4.7 |
| 283           | 3120       | <a href="#">XP_013930707.1</a> | 47.54  | 7            | 0               | 0               | 0               | 7               | 7               | 7               | 0               |          |          |         | 4.7 |

total 523 p

8/2/22, 12:12 PM

proteins

| Protein Group | Protein ID | Accession                      | -10lgP | Coverage (%) | Coverage (%) F1 | Coverage (%) F2 | Coverage (%) F3 | Coverage (%) F4 | Coverage (%) F5 | Coverage (%) F6 | Coverage (%) F7 | Area F1 | Area F2 | Area F3 | A   |
|---------------|------------|--------------------------------|--------|--------------|-----------------|-----------------|-----------------|-----------------|-----------------|-----------------|-----------------|---------|---------|---------|-----|
| 283           | 3122       | <a href="#">XP_013931116.1</a> | 47.54  | 7            | 0               | 0               | 0               | 7               | 7               | 7               | 0               |         |         |         | 4.7 |
| 283           | 3125       | <a href="#">XP_013908942.1</a> | 47.54  | 7            | 0               | 0               | 0               | 7               | 7               | 7               | 0               |         |         |         | 4.7 |
| 283           | 3100       | <a href="#">XP_013911300.1</a> | 47.54  | 6            | 0               | 0               | 0               | 6               | 6               | 6               | 0               |         |         |         | 4.7 |
| 283           | 3127       | <a href="#">ETE60792.1</a>     | 47.54  | 6            | 0               | 0               | 0               | 6               | 6               | 6               | 0               |         |         |         | 4.7 |
| 283           | 3129       | <a href="#">XP_013924759.1</a> | 47.54  | 6            | 0               | 0               | 0               | 6               | 6               | 6               | 0               |         |         |         | 4.7 |
| 283           | 70335      | <a href="#">XP_026542761.1</a> | 47.54  | 6            | 0               | 0               | 0               | 6               | 6               | 6               | 0               |         |         |         | 4.7 |
| 283           | 3130       | <a href="#">ETE59971.1</a>     | 47.54  | 5            | 0               | 0               | 0               | 5               | 5               | 5               | 0               |         |         |         | 4.7 |
| 283           | 2863       | <a href="#">XP_013921022.1</a> | 47.54  | 5            | 0               | 0               | 0               | 5               | 5               | 5               | 0               |         |         |         | 4.7 |
| 283           | 3131       | <a href="#">LAB40587.1</a>     | 47.54  | 5            | 0               | 0               | 0               | 5               | 5               | 5               | 0               |         |         |         | 4.7 |
| 404           | 70338      | <a href="#">TRINITY_DN1911</a> | 46.25  | 25           | 0               | 0               | 0               | 0               | 25              | 0               | 0               |         |         |         |     |
| 404           | 70338      | <a href="#">TRINITY_DN1911</a> | 46.25  | 25           | 0               | 0               | 0               | 0               | 25              | 0               | 0               |         |         |         |     |
| 305           | 70262      | <a href="#">XP_026548138.1</a> | 45.78  | 1            | 0               | 0               | 0               | 0               | 0               | 0               | 1               |         |         |         |     |
| 375           | 2015       | <a href="#">XP_032092456.1</a> | 42.06  | 5            | 0               | 0               | 0               | 0               | 0               | 0               | 5               |         |         |         |     |
| 304           | 2452       | <a href="#">XP_007437884.2</a> | 40.82  | 1            | 0               | 0               | 0               | 0               | 0               | 1               | 0               |         |         |         |     |
| 304           | 2453       | <a href="#">XP_007437883.2</a> | 40.82  | 1            | 0               | 0               | 0               | 0               | 0               | 1               | 0               |         |         |         |     |
| 304           | 2910       | <a href="#">XP_007437886.2</a> | 40.82  | 1            | 0               | 0               | 0               | 0               | 0               | 1               | 0               |         |         |         |     |
| 304           | 2911       | <a href="#">XP_007437885.2</a> | 40.82  | 1            | 0               | 0               | 0               | 0               | 0               | 1               | 0               |         |         |         |     |
| 165           | 2674       | <a href="#">XP_007421854.1</a> | 39.14  | 2            | 0               | 0               | 0               | 2               | 2               | 0               | 0               |         |         |         | 4.7 |
| total 523 p   |            |                                |        |              |                 |                 |                 |                 |                 |                 |                 |         |         |         |     |

TRINITY\_DN9  
[back to list](#)

| [Protein Coverage](#) | [Supporting Peptides](#) |  
Protein Coverage:

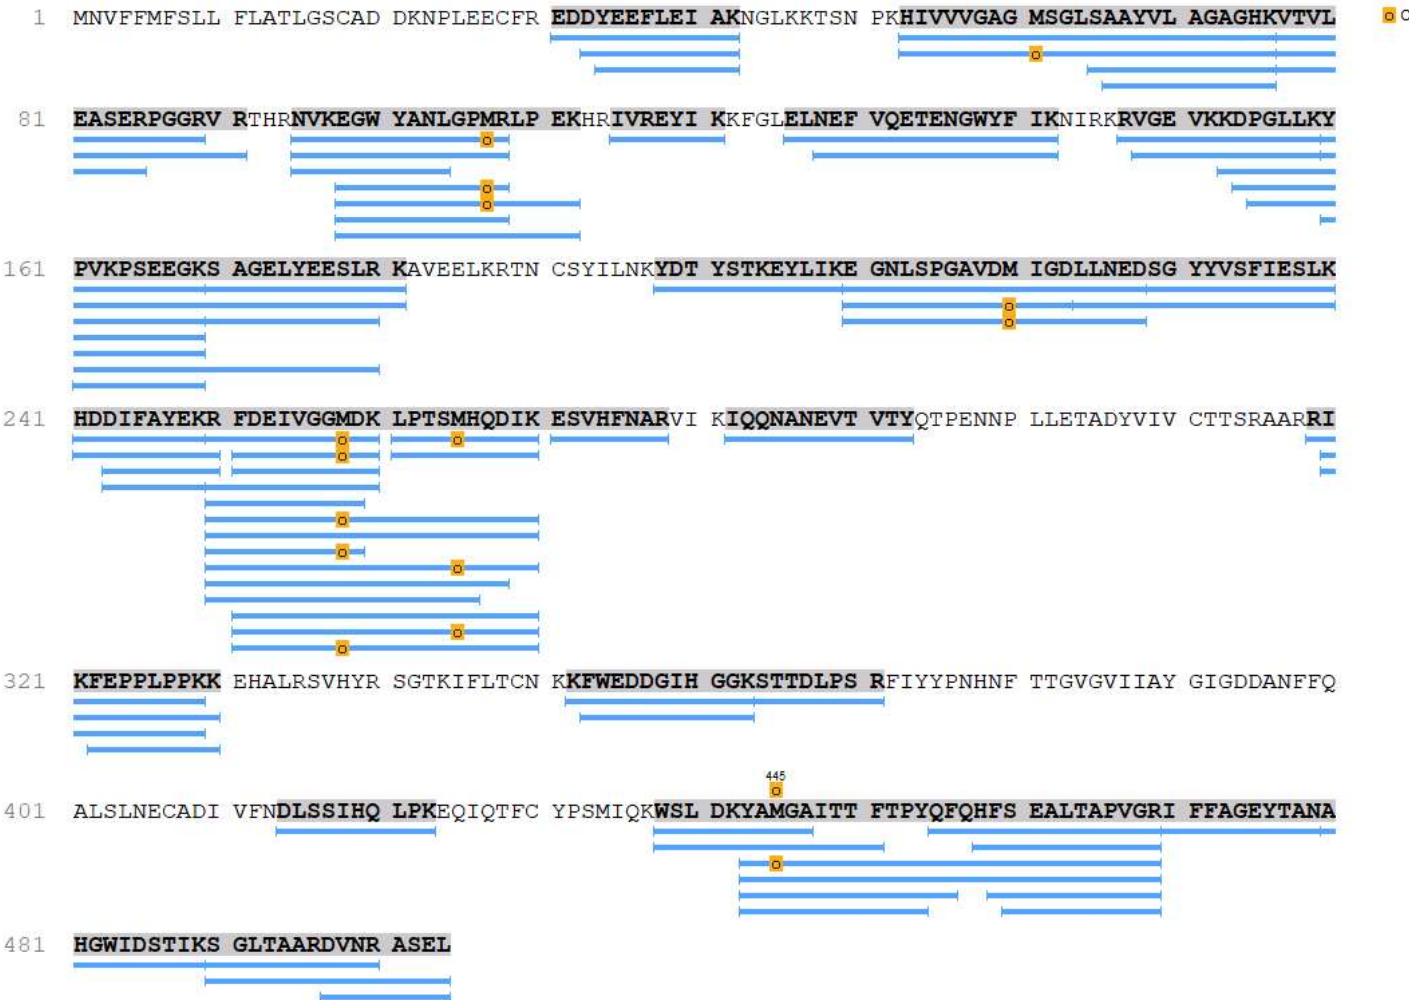

Supporting Peptides:

| Peptide                                 | Uniq | -10lgP | Mass      | Length | ppm  | m/z       | z | RT    | Fraction | Scan     | Source File               |
|-----------------------------------------|------|--------|-----------|--------|------|-----------|---|-------|----------|----------|---------------------------|
| K.YPVKPSEEGKSAGELYEESLRK.A              | Y    | 103.19 | 2495.2544 | 22     | 0.3  | 624.8210  | 4 | 41.37 | 1        | F1:12431 | 12112021_RID_2349_DP1.raw |
| K.YAMGAITTFPTYQFQHFSEALTAPVGR.I         | N    | 93.35  | 3003.4587 | 27     | 0.8  | 1002.1609 | 3 | 68.16 | 3        | F3:20530 | 17112021_RID_2349_DP3.raw |
| R.FDEIVGGMDKLPTSMHQDIK.E                | Y    | 92.44  | 2260.0867 | 20     | 0.3  | 754.3698  | 3 | 47.85 | 3        | F3:13952 | 17112021_RID_2349_DP3.raw |
| K.DPGLLKYPVKPSEEGK.S                    | N    | 90.01  | 1755.9407 | 16     | 1.1  | 586.3215  | 3 | 37.86 | 1        | F1:11209 | 12112021_RID_2349_DP1.raw |
| R.NVKEGWYANLGPMR.L                      | N    | 89.97  | 1633.8035 | 14     | 1.1  | 817.9099  | 2 | 46.58 | 1        | F1:14171 | 12112021_RID_2349_DP1.raw |
| K.SGLTAARDVNRASEL                       | N    | 81.95  | 1558.8063 | 15     | -0.1 | 520.6093  | 3 | 35.16 | 1        | F1:10323 | 12112021_RID_2349_DP1.raw |
| K.RFDEIVGGMDK.L                         | N    | 81.31  | 1265.6074 | 11     | 0.1  | 633.8110  | 2 | 38.73 | 1        | F1:11503 | 12112021_RID_2349_DP1.raw |
| K.YDTYSTKEYLIK.E                        | N    | 80.80  | 1522.7555 | 12     | 0.9  | 762.3857  | 2 | 38.58 | 2        | F2:10545 | 12112021_RID_2349_DP2.raw |
| K.HIVVVGAGMSGLSAAYVLGAGHK.V             | Y    | 80.72  | 2264.2100 | 24     | -0.3 | 755.7437  | 3 | 58.30 | 3        | F3:17243 | 17112021_RID_2349_DP3.raw |
| K.KDPGLLKYPVKPSEEGK.S                   | N    | 80.37  | 1884.0355 | 17     | -0.1 | 472.0161  | 4 | 43.31 | 1        | F1:13296 | 12112021_RID_2349_DP1.raw |
| K.YAM(+15.99)GAITTFPTYQFQHFSEALTAPVGR.I | N    | 80.23  | 3019.4539 | 27     | 0.9  | 1007.4928 | 3 | 64.54 | 3        | F3:19257 | 17112021_RID_2349_DP3.raw |
| K.KFWEDDGIHGGK.S                        | N    | 78.30  | 1387.6520 | 12     | 0.2  | 694.8334  | 2 | 31.47 | 3        | F3:8478  | 17112021_RID_2349_DP3.raw |
| K.SAGELYEESLRK.A                        | Y    | 76.14  | 1380.6885 | 12     | 0.1  | 691.3516  | 2 | 32.27 | 1        | F1:9527  | 12112021_RID_2349_DP1.raw |
| K.RFDEIVGGMDKLPTSMHQDIK.E               | Y    | 75.67  | 2416.1877 | 21     | 0.3  | 605.0544  | 4 | 49.40 | 3        | F3:14259 | 17112021_RID_2349_DP3.raw |
| K.FWEDDGIHGGK.S                         | N    | 74.52  | 1259.5570 | 11     | 0.6  | 630.7861  | 2 | 33.77 | 2        | F2:8859  | 12112021_RID_2349_DP2.raw |
| K.EGWYANLGPMR.L                         | N    | 74.35  | 1292.5972 | 11     | 0.2  | 647.3060  | 2 | 50.70 | 1        | F1:15490 | 12112021_RID_2349_DP1.raw |
| R.EDDYEEFLEIAK.N                        | N    | 74.11  | 1499.6667 | 12     | 0.7  | 750.8412  | 2 | 59.88 | 5        | F5:17908 | 17112021_RID_2349_DP5.raw |
| K.LPTSMHQDIK.E                          | Y    | 73.02  | 1168.5911 | 10     | 0.7  | 585.3032  | 2 | 26.70 | 2        | F2:6395  | 12112021_RID_2349_DP2.raw |

| Peptide                    | Uniq | -10lgP | Mass      | Length | ppm  | m/z       | z | RT    | Fraction | Scan     | Source File               |
|----------------------------|------|--------|-----------|--------|------|-----------|---|-------|----------|----------|---------------------------|
| R.NVKEGWYANLGPM(+15.99)R.L | N    | 71.22  | 1649.7983 | 14     | 0.4  | 825.9067  | 2 | 41.24 | 1        | F1:12368 | 12112021_RID_2349_DP1.raw |
| D.PGLLKYPVKPSEEGK.S        | N    | 71.12  | 1640.9137 | 15     | 0.7  | 547.9789  | 3 | 36.73 | 1        | F1:10817 | 12112021_RID_2349_DP1.raw |
| K.EGWYANLGPM(+15.99)R.L    | N    | 70.55  | 1308.5920 | 11     | 0.5  | 655.3036  | 2 | 44.48 | 3        | F3:12782 | 17112021_RID_2349_DP3.raw |
| K.HDDIFAYEK.R              | N    | 70.19  | 1136.5138 | 9      | 0.4  | 569.2644  | 2 | 36.68 | 2        | F2:9942  | 12112021_RID_2349_DP2.raw |
| K.YPVKPSEEGKSAGELYEESLR.K  | Y    | 70.02  | 2367.1594 | 21     | 0.8  | 790.0610  | 3 | 41.55 | 1        | F1:12377 | 12112021_RID_2349_DP1.raw |
| L.ELNEFVQETENGWYFIK.N      | Y    | 68.81  | 2145.0054 | 17     | 0.3  | 1073.5103 | 2 | 67.16 | 2        | F2:19907 | 12112021_RID_2349_DP2.raw |
| K.SAGELYEESLR.K            | Y    | 68.45  | 1252.5935 | 11     | -0.9 | 627.3035  | 2 | 38.10 | 1        | F1:11394 | 12112021_RID_2349_DP1.raw |
| K.RFDEIVGGM(+15.99)DK.L    | N    | 67.11  | 1281.6023 | 11     | 0.5  | 641.8087  | 2 | 36.31 | 2        | F2:10416 | 12112021_RID_2349_DP2.raw |
| K.YPVKPSEEGK.S             | N    | 66.22  | 1132.5764 | 10     | 0.6  | 567.2958  | 2 | 19.01 | 5        | F5:4120  | 17112021_RID_2349_DP5.raw |
| K.ESVHFNAR.V               | Y    | 64.04  | 958.4620  | 8      | -0.8 | 480.2379  | 2 | 23.05 | 1        | F1:6037  | 12112021_RID_2349_DP1.raw |
| R.VGEVKKDPGLLK.Y           | N    | 63.88  | 1281.7656 | 12     | -0.3 | 428.2624  | 3 | 28.13 | 1        | F1:8041  | 12112021_RID_2349_DP1.raw |
| L.NEFVQETENGWYFIK.N        | N    | 63.17  | 1902.8788 | 15     | 0.5  | 952.4471  | 2 | 60.53 | 2        | F2:17717 | 12112021_RID_2349_DP2.raw |
| D.DYEEFLEIAK.N             | N    | 63.01  | 1255.5972 | 10     | 0.6  | 628.8062  | 2 | 58.64 | 1        | F1:18007 | 12112021_RID_2349_DP1.raw |
| R.IKFEPPLPPK.K             | N    | 62.32  | 1164.6907 | 10     | 0.5  | 583.3529  | 2 | 42.88 | 1        | F1:12794 | 12112021_RID_2349_DP1.raw |
| D.SGYVVSFIESLK.H           | N    | 61.77  | 1391.6973 | 12     | 0.1  | 696.8560  | 2 | 60.36 | 3        | F3:17967 | 17112021_RID_2349_DP3.raw |
| K.EGNLSPGAVDMIGDLLNED.S    | N    | 61.67  | 1957.8938 | 19     | 0.0  | 979.9542  | 2 | 76.89 | 4        | F4:23445 | 17112021_RID_2349_DP4.raw |
| R.DVNRASEL                 | N    | 60.54  | 902.4457  | 8      | -0.6 | 452.2299  | 2 | 26.74 | 1        | F1:7420  | 12112021_RID_2349_DP1.raw |
| K.VTVLEASERPGGR.V          | N    | 60.35  | 1369.7313 | 13     | -0.1 | 457.5843  | 3 | 29.25 | 1        | F1:8170  | 12112021_RID_2349_DP1.raw |
| K.HDDIFAYEKR.F             | N    | 60.12  | 1292.6149 | 10     | 0.0  | 431.8789  | 3 | 32.95 | 3        | F3:8849  | 17112021_RID_2349_DP3.raw |
| R.NVKEGWYANL.G             | N    | 59.21  | 1192.5876 | 10     | -0.3 | 597.3009  | 2 | 47.98 | 1        | F1:14543 | 12112021_RID_2349_DP1.raw |
| K.VTVLEASER.P              | N    | 58.47  | 1002.5345 | 9      | -0.5 | 502.2743  | 2 | 30.13 | 5        | F5:7870  | 17112021_RID_2349_DP5.raw |
| R.IKFEPPLPPKK.E            | N    | 58.07  | 1292.7855 | 11     | 0.1  | 647.4001  | 2 | 39.85 | 2        | F2:10760 | 12112021_RID_2349_DP2.raw |
| K.SGLTAARDVNR.A            | N    | 57.18  | 1158.6105 | 11     | -0.1 | 387.2107  | 3 | 21.39 | 1        | F1:5502  | 12112021_RID_2349_DP1.raw |
| Y.QFQHFSEALTAPVGR.I        | N    | 56.85  | 1686.8478 | 15     | 0.7  | 844.4318  | 2 | 42.64 | 4        | F4:12109 | 17112021_RID_2349_DP4.raw |
| R.FDEIVGGMMDK.L            | N    | 56.21  | 1109.5062 | 10     | 0.9  | 555.7609  | 2 | 39.99 | 2        | F2:11060 | 12112021_RID_2349_DP2.raw |
| N.AHGWDSTIK.S              | N    | 55.64  | 1126.5771 | 10     | 1.1  | 564.2964  | 2 | 35.13 | 3        | F3:9624  | 17112021_RID_2349_DP3.raw |
| K.WSLDKYAMGA.I             | N    | 55.33  | 1140.5273 | 10     | 0.5  | 571.2712  | 2 | 50.51 | 1        | F1:15333 | 12112021_RID_2349_DP1.raw |
| K.STTDLPSR.F               | N    | 55.31  | 875.4348  | 8      | 0.5  | 438.7249  | 2 | 22.15 | 1        | F1:5769  | 12112021_RID_2349_DP1.raw |
| D.YEEFLEIAK.N              | N    | 55.22  | 1140.5702 | 9      | -0.1 | 571.2923  | 2 | 49.00 | 1        | F1:14874 | 12112021_RID_2349_DP1.raw |
| H.FSEALTAPVGR.I            | N    | 55.11  | 1146.6033 | 11     | 0.5  | 574.3092  | 2 | 39.16 | 5        | F5:11001 | 17112021_RID_2349_DP5.raw |
| R.IFFAGEYTAN.A             | N    | 54.27  | 1131.5237 | 10     | 0.8  | 1132.5319 | 1 | 55.58 | 1        | F1:16980 | 12112021_RID_2349_DP1.raw |
| R.FDEIVGGM(+15.99)DK.L     | N    | 53.88  | 1125.5012 | 10     | -0.3 | 563.7577  | 2 | 37.17 | 1        | F1:10962 | 12112021_RID_2349_DP1.raw |
| K.LPTSM(+15.99)HQDIK.E     | Y    | 53.34  | 1184.5859 | 10     | 0.8  | 395.8696  | 3 | 26.70 | 2        | F2:6476  | 12112021_RID_2349_DP2.raw |
| K.EGWYANLGPMRLPEK.H        | N    | 52.68  | 1759.8716 | 15     | 0.9  | 587.6317  | 3 | 52.96 | 2        | F2:15393 | 12112021_RID_2349_DP2.raw |
| K.RFDEIVGGMMDKLPTSMHQD.I   | Y    | 52.19  | 2175.0088 | 19     | 1.0  | 726.0109  | 3 | 48.28 | 3        | F3:14082 | 17112021_RID_2349_DP3.raw |
| N.DLSSIHQLPK.E             | N    | 51.71  | 1136.6189 | 10     | 0.9  | 569.3173  | 2 | 34.51 | 1        | F1:10039 | 12112021_RID_2349_DP1.raw |
| K.FEPPLPPKK.E              | N    | 51.31  | 1051.6066 | 9      | 0.2  | 526.8107  | 2 | 31.13 | 3        | F3:8589  | 17112021_RID_2349_DP3.raw |

| Peptide                              | Uniq | -10lgP | Mass      | Length | ppm  | m/z      | z | RT    | Fraction | Scan     | Source File               |
|--------------------------------------|------|--------|-----------|--------|------|----------|---|-------|----------|----------|---------------------------|
| K.EGNLSPGAVDM(+15.99)IGDLLNED.S      | N    | 51.30  | 1973.8888 | 19     | 0.5  | 987.9521 | 2 | 67.55 | 4        | F4:20200 | 17112021_RID_2349_DP4.raw |
| S.AAYVLAGAGHK.V                      | N    | 50.59  | 1056.5715 | 11     | 1.1  | 529.2936 | 2 | 24.54 | 3        | F3:6001  | 17112021_RID_2349_DP3.raw |
| D.LLNEDSGYYVSFIESLK.H                | N    | 49.92  | 1975.9778 | 17     | 0.7  | 988.9969 | 2 | 68.81 | 3        | F3:20708 | 17112021_RID_2349_DP3.raw |
| K.RFDEIVGGMDKLPTSM(+15.99)HQDIK.E    | Y    | 49.70  | 2432.1829 | 21     | 0.4  | 609.0532 | 4 | 45.01 | 3        | F3:12950 | 17112021_RID_2349_DP3.raw |
| K.RFDEIVGGM(+15.99)D.K               | N    | 49.15  | 1153.5073 | 10     | 0.1  | 577.7610 | 2 | 38.54 | 3        | F3:10739 | 17112021_RID_2349_DP3.raw |
| R.RIKFEPLPPK.K                       | N    | 49.13  | 1320.7917 | 11     | 0.5  | 441.2714 | 3 | 45.59 | 2        | F2:12721 | 12112021_RID_2349_DP2.raw |
| D.DIFAYEKR.F                         | N    | 48.19  | 1040.5291 | 8      | 0.1  | 521.2719 | 2 | 35.16 | 3        | F3:9617  | 17112021_RID_2349_DP3.raw |
| K.HIVVVGAGM(+15.99)SGLSAAYVLAGAGHK.V | Y    | 47.83  | 2280.2048 | 24     | -0.2 | 761.0754 | 3 | 51.51 | 3        | F3:14961 | 17112021_RID_2349_DP3.raw |
| K.YAMGAITTFPTY.Q                     | N    | 46.88  | 1334.6217 | 12     | 0.9  | 668.3187 | 2 | 64.07 | 4        | F4:19119 | 17112021_RID_2349_DP4.raw |
| R.FDEIVGGMDKLPTSM(+15.99)HQDIK.E     | Y    | 46.36  | 2276.0818 | 20     | 0.4  | 759.7015 | 3 | 43.40 | 4        | F4:12371 | 17112021_RID_2349_DP4.raw |
| K.EGNLSPGAVDM(+15.99)IGD.L           | N    | 46.09  | 1389.6082 | 14     | 0.2  | 695.8115 | 2 | 46.47 | 4        | F4:13379 | 17112021_RID_2349_DP4.raw |
| Y.PVKPSEEGK.S                        | N    | 45.74  | 969.5131  | 9      | -0.5 | 485.7636 | 2 | 19.27 | 2        | F2:3861  | 12112021_RID_2349_DP2.raw |
| K.IQQNANEVTVTY.Q                     | Y    | 45.71  | 1378.6729 | 12     | 0.8  | 690.3442 | 2 | 41.87 | 4        | F4:11834 | 17112021_RID_2349_DP4.raw |
| K.RFDEIVGGMD.K                       | N    | 45.54  | 1137.5125 | 10     | -0.5 | 569.7632 | 2 | 45.56 | 3        | F3:13157 | 17112021_RID_2349_DP3.raw |
| K.VTVLEASERPGGRVR.T                  | N    | 45.40  | 1624.9009 | 15     | 0.3  | 542.6411 | 3 | 30.01 | 1        | F1:8563  | 12112021_RID_2349_DP1.raw |
| Q.HFSEALTAPVGR.I                     | N    | 42.43  | 1283.6622 | 12     | 0.5  | 642.8387 | 2 | 34.80 | 4        | F4:9467  | 17112021_RID_2349_DP4.raw |
| R.IVREYIK.K                          | N    | 41.49  | 919.5491  | 7      | 0.1  | 460.7819 | 2 | 25.34 | 1        | F1:6965  | 12112021_RID_2349_DP1.raw |
| K.YAMGAITTFPTYQF.Q                   | N    | 41.39  | 1609.7487 | 14     | -0.2 | 805.8814 | 2 | 71.88 | 3        | F3:21650 | 17112021_RID_2349_DP3.raw |
| K.RFDEIVGGMDKLPTSMH.Q                | Y    | 41.32  | 1931.9233 | 17     | 0.7  | 644.9822 | 3 | 48.99 | 3        | F3:14232 | 17112021_RID_2349_DP3.raw |
| K.EGWYANLGPM(+15.99)RLPEK.H          | N    | 40.61  | 1775.8665 | 15     | 0.9  | 592.9633 | 3 | 45.16 | 3        | F3:12960 | 17112021_RID_2349_DP3.raw |
| L.SAAYVLAGAGHK.V                     | N    | 40.21  | 1143.6036 | 12     | 0.7  | 572.8095 | 2 | 26.75 | 5        | F5:6718  | 17112021_RID_2349_DP5.raw |
| K.RFDEIVGGM(+15.99)DKLPTSMHQDIK.E    | Y    | 40.16  | 2432.1829 | 21     | 1.5  | 811.7361 | 3 | 42.94 | 3        | F3:12300 | 17112021_RID_2349_DP3.raw |
| F.SEALTAPVGR.I                       | N    | 40.05  | 999.5349  | 10     | -0.1 | 500.7746 | 2 | 30.20 | 3        | F3:7936  | 17112021_RID_2349_DP3.raw |
| D.DIFAYEK.R                          | N    | 39.75  | 884.4279  | 7      | 0.8  | 885.4359 | 1 | 41.87 | 4        | F4:11928 | 17112021_RID_2349_DP4.raw |
| K.RVGEVKKDPGLLK.Y                    | N    | 39.62  | 1437.8667 | 13     | 1.0  | 480.2967 | 3 | 39.89 | 1        | F1:11650 | 12112021_RID_2349_DP1.raw |
| R.FDEIVGGM(+15.99)DKLPTSMHQDIK.E     | Y    | 38.92  | 2276.0818 | 20     | 0.9  | 759.7019 | 3 | 41.79 | 3        | F3:11943 | 17112021_RID_2349_DP3.raw |
| K.WSLDKYAMGAITTF.T                   | N    | 38.72  | 1602.7751 | 14     | 1.3  | 802.3959 | 2 | 67.34 | 3        | F3:20215 | 17112021_RID_2349_DP3.raw |

TRINITY\_DN233  
[back to list](#)  
  
| [Protein Coverage](#) | [Supporting Peptides](#) |  
Protein Coverage:

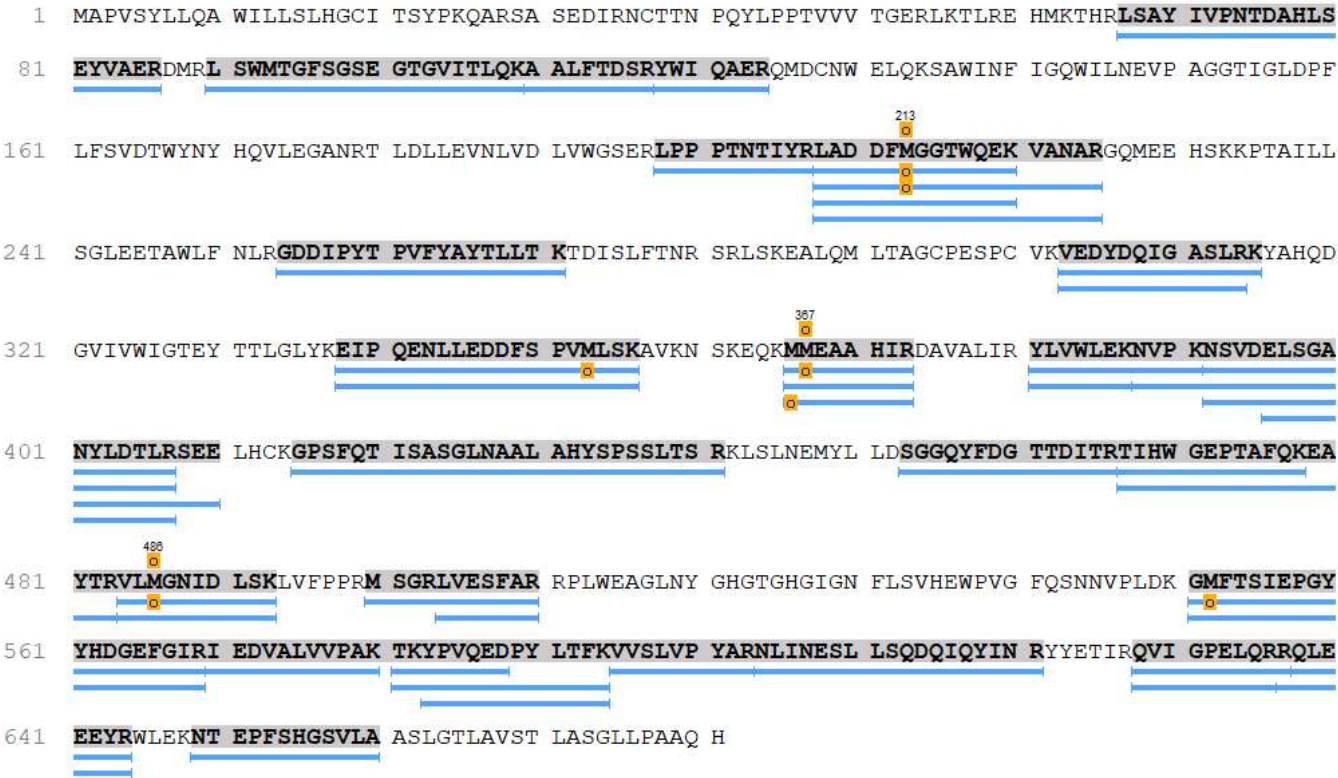

Supporting Peptides:

| Peptide                         | Uniq | -10lgP | Mass      | Length | ppm  | m/z       | z | RT    | Fraction | Scan     | Source File               | Area F  |
|---------------------------------|------|--------|-----------|--------|------|-----------|---|-------|----------|----------|---------------------------|---------|
| R.NLINESLLSQDQIQYINR.Y          | Y    | 102.57 | 2160.1174 | 18     | 0.2  | 1081.0662 | 2 | 57.94 | 2        | F2:16943 | 12112021_RID_2349_DP2.raw | 1.6872E |
| R.LADDFMGGTWQEKVANAR.G          | Y    | 97.16  | 2007.9473 | 18     | 0.4  | 1004.9813 | 2 | 49.13 | 1        | F1:14896 | 12112021_RID_2349_DP1.raw | 1.1424E |
| K.NSVDELSGANYLDTLR.S            | Y    | 96.75  | 1765.8483 | 16     | 0.7  | 883.9320  | 2 | 53.81 | 2        | F2:15577 | 12112021_RID_2349_DP2.raw | 1.6193E |
| K.EIPQENLLEDDFSPVMLSK.A         | N    | 94.92  | 2203.0718 | 19     | 0.2  | 1102.5433 | 2 | 65.59 | 1        | F1:20182 | 12112021_RID_2349_DP1.raw | 4.4307E |
| K.TKYPVQEDPYLTFK.V              | Y    | 84.98  | 1727.8770 | 14     | 0.9  | 576.9668  | 3 | 46.95 | 1        | F1:14170 | 12112021_RID_2349_DP1.raw | 2.0786E |
| K.VEDYDQIGASLR.K                | Y    | 81.88  | 1364.6572 | 12     | 0.7  | 683.3364  | 2 | 42.99 | 2        | F2:12000 | 12112021_RID_2349_DP2.raw | 2.0691E |
| R.TIHWGEPTAFQK.E                | N    | 81.74  | 1413.7041 | 12     | 0.9  | 707.8600  | 2 | 42.18 | 1        | F1:12610 | 12112021_RID_2349_DP1.raw | 4.9198E |
| R.LADDFM(+15.99)GGTWQEKVANAR.G  | Y    | 80.31  | 2023.9421 | 18     | 0.5  | 675.6550  | 3 | 43.18 | 1        | F1:12956 | 12112021_RID_2349_DP1.raw | 6.9069E |
| R.IEDVALVPAK.T                  | Y    | 80.13  | 1152.6754 | 11     | -0.4 | 577.3447  | 2 | 45.25 | 1        | F1:13594 | 12112021_RID_2349_DP1.raw | 2.7331E |
| R.LADDFM(+15.99)GGTWQEK.V       | Y    | 79.06  | 1512.6555 | 13     | 0.1  | 757.3351  | 2 | 41.88 | 1        | F1:12596 | 12112021_RID_2349_DP1.raw | 9.9489E |
| R.LADDFMGGTWQEK.V               | Y    | 75.54  | 1496.6605 | 13     | 1.0  | 749.3383  | 2 | 49.98 | 1        | F1:15195 | 12112021_RID_2349_DP1.raw | 1.722E7 |
| R.VLMGNIDLSK.L                  | N    | 74.32  | 1088.5900 | 10     | 0.9  | 545.3027  | 2 | 44.91 | 1        | F1:13547 | 12112021_RID_2349_DP1.raw | 7.3687E |
| R.YLVWLEKNVPK.N                 | N    | 74.01  | 1387.7864 | 11     | 0.1  | 694.9005  | 2 | 48.76 | 1        | F1:14779 | 12112021_RID_2349_DP1.raw | 3.2724E |
| K.EIPQENLLEDDFSPVM(+15.99)LSK.A | N    | 72.70  | 2219.0667 | 19     | -0.3 | 1110.5403 | 2 | 61.58 | 2        | F2:18110 | 12112021_RID_2349_DP2.raw | 1.502E6 |
| K.VEDYDQIGASLRK.Y               | Y    | 72.65  | 1492.7521 | 13     | 1.0  | 747.3841  | 2 | 37.40 | 1        | F1:11075 | 12112021_RID_2349_DP1.raw | 2.5025E |
| K.YPVQEDPYLTFK.V                | Y    | 72.14  | 1498.7344 | 12     | 0.1  | 750.3745  | 2 | 49.80 | 4        | F4:14509 | 17112021_RID_2349_DP4.raw | 1.1678E |
| K.AALFTDSR.Y                    | Y    | 69.22  | 879.4450  | 8      | -0.4 | 440.7296  | 2 | 32.38 | 2        | F2:8405  | 12112021_RID_2349_DP2.raw | 3.6699E |
| R.VLM(+15.99)GNIDLSK.L          | N    | 68.66  | 1104.5848 | 10     | 0.1  | 553.2997  | 2 | 44.91 | 1        | F1:13558 | 12112021_RID_2349_DP1.raw | 5.0787E |
| K.VVSLVPYAR.N                   | N    | 63.21  | 1002.5862 | 9      | 0.4  | 502.3006  | 2 | 43.57 | 1        | F1:13098 | 12112021_RID_2349_DP1.raw | 3.175E7 |
| K.MMEAAHIR.D                    | N    | 61.26  | 957.4525  | 8      | 0.5  | 479.7338  | 2 | 24.46 | 2        | F2:5605  | 12112021_RID_2349_DP2.raw | 2.5335E |
| R.LPPPTNTIYR.L                  | N    | 61.17  | 1170.6396 | 10     | 0.3  | 586.3273  | 2 | 35.87 | 1        | F1:10436 | 12112021_RID_2349_DP1.raw | 2.508E7 |
| K.NTEPFSHGSLVA.A                | Y    | 60.30  | 1257.5989 | 12     | 0.5  | 629.8070  | 2 | 40.01 | 1        | F1:11896 | 12112021_RID_2349_DP1.raw | 8.7833E |

| Peptide                         | Uniq | -10lgP | Mass      | Length | ppm  | m/z       | z | RT    | Fraction | Scan     | Source File               | Area F  |
|---------------------------------|------|--------|-----------|--------|------|-----------|---|-------|----------|----------|---------------------------|---------|
| R.LSAYIVPNTDAHLSEYVAER.D        | Y    | 60.08  | 2247.1172 | 20     | 0.6  | 750.0468  | 3 | 50.55 | 2        | F2:14530 | 12112021_RID_2349_DP2.raw | 1.5595E |
| D.ELSGANYLDTLR.S                | Y    | 59.09  | 1350.6779 | 12     | 0.5  | 676.3466  | 2 | 48.45 | 4        | F4:14024 | 17112021_RID_2349_DP4.raw |         |
| R.RQLEEEYR.W                    | Y    | 56.64  | 1121.5465 | 8      | 0.2  | 561.7806  | 2 | 21.08 | 3        | F3:4733  | 17112021_RID_2349_DP3.raw |         |
| K.MM(+15.99)EAAHIR.D            | N    | 56.35  | 973.4473  | 8      | -0.3 | 487.7308  | 2 | 24.42 | 2        | F2:5548  | 12112021_RID_2349_DP2.raw |         |
| K.M(+15.99)MEAAHIR.D            | N    | 55.53  | 973.4473  | 8      | -0.6 | 487.7307  | 2 | 22.62 | 2        | F2:5124  | 12112021_RID_2349_DP2.raw |         |
| R.MSGRLVESFAR.R                 | Y    | 55.47  | 1251.6394 | 11     | 0.0  | 418.2204  | 3 | 38.02 | 1        | F1:11242 | 12112021_RID_2349_DP1.raw | 1.6579E |
| D.SGGQYFDGTTDITR.T              | N    | 55.24  | 1516.6793 | 14     | 0.9  | 759.3477  | 2 | 39.61 | 4        | F4:11084 | 17112021_RID_2349_DP4.raw |         |
| R.QVIGPELQR.R                   | Y    | 54.67  | 1038.5822 | 9      | -0.4 | 520.2982  | 2 | 34.14 | 1        | F1:10002 | 12112021_RID_2349_DP1.raw | 2.1413E |
| R.LSWMTGFSGSEGTGVITLQK.A        | Y    | 53.91  | 2098.0405 | 20     | 0.2  | 1050.0277 | 2 | 62.94 | 2        | F2:18422 | 12112021_RID_2349_DP2.raw | 2.1277E |
| R.YWQAER.Q                      | N    | 52.15  | 964.4766  | 7      | -0.4 | 483.2454  | 2 | 36.97 | 2        | F2:9988  | 12112021_RID_2349_DP2.raw | 1.3881E |
| R.GDDIPYTPVFYAYTLLTK.T          | N    | 51.60  | 2076.0454 | 18     | 0.2  | 1039.0302 | 2 | 78.46 | 1        | F1:24532 | 12112021_RID_2349_DP1.raw | 3.0975E |
| K.GPSFQTISASGLNAALAHYSPSSLSR.K  | Y    | 50.90  | 2719.3564 | 27     | 0.3  | 907.4597  | 3 | 60.52 | 2        | F2:17711 | 12112021_RID_2349_DP2.raw |         |
| K.NVPKNSVDELSGANYLDTLR.S        | Y    | 50.02  | 2204.1072 | 20     | 0.7  | 1103.0616 | 2 | 50.58 | 1        | F1:15379 | 12112021_RID_2349_DP1.raw | 2.6389E |
| K.GMFTSIEPGYYHDGEFGIR.I         | N    | 48.84  | 2174.9731 | 19     | 0.7  | 725.9988  | 3 | 56.28 | 2        | F2:16416 | 12112021_RID_2349_DP2.raw |         |
| K.GM(+15.99)FTSIEPGYYHDGEFGIR.I | N    | 46.73  | 2190.9680 | 19     | 0.3  | 731.3302  | 3 | 51.35 | 2        | F2:14719 | 12112021_RID_2349_DP2.raw |         |
| R.TIHWGEPTAFQKEAYTR.V           | N    | 46.04  | 2033.9958 | 17     | 0.9  | 679.0065  | 3 | 45.28 | 1        | F1:13603 | 12112021_RID_2349_DP1.raw | 2.9881E |
| R.QVIGPELQRR.Q                  | Y    | 45.98  | 1194.6832 | 10     | 0.8  | 598.3494  | 2 | 28.93 | 1        | F1:8159  | 12112021_RID_2349_DP1.raw | 4.0244E |
| R.LVESFAR.R                     | Y    | 45.21  | 820.4443  | 7      | -0.1 | 411.2294  | 2 | 31.00 | 4        | F4:8159  | 17112021_RID_2349_DP4.raw | 2.2969E |
| R.YLVWLEK.N                     | N    | 43.98  | 949.5273  | 7      | -0.5 | 475.7707  | 2 | 51.37 | 1        | F1:15594 | 12112021_RID_2349_DP1.raw | 3.0018E |
| K.NSVDELSGANYLDTLRSEE.L         | Y    | 41.99  | 2110.9653 | 19     | 0.7  | 1056.4907 | 2 | 55.67 | 1        | F1:17087 | 12112021_RID_2349_DP1.raw | 7.1446E |
| K.TKYPVQED.P                    | Y    | 39.43  | 978.4658  | 8      | 0.6  | 490.2405  | 2 | 23.69 | 1        | F1:6389  | 12112021_RID_2349_DP1.raw | 1.8089E |
| R.QLEEEYR.W                     | Y    | 39.22  | 965.4454  | 7      | -0.3 | 483.7298  | 2 | 24.68 | 2        | F2:5729  | 12112021_RID_2349_DP2.raw |         |

AHJ80886.1  
[back to list](#)

| [Protein Coverage](#) | [Supporting Peptides](#) |

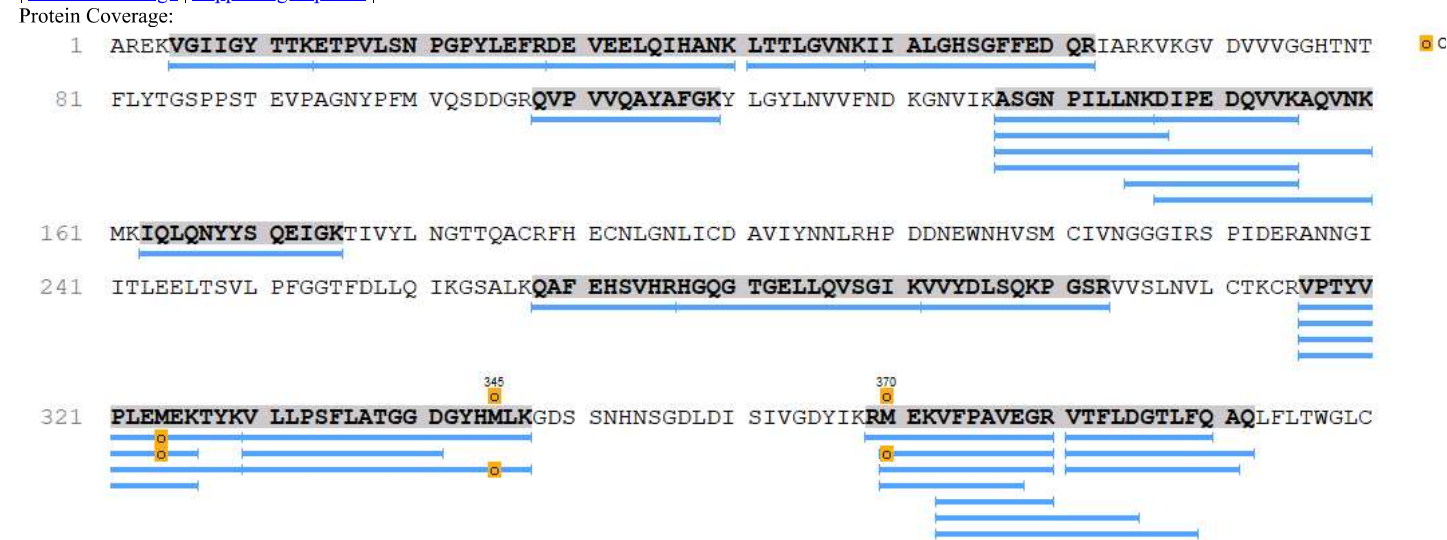

401 ISLLFFIL  
Supporting Peptides:

| Peptide | Uniq | -10lgP | Mass | Length | ppm | m/z | z | RT | Fraction | Scan | Source File | Area F1 |
|---------|------|--------|------|--------|-----|-----|---|----|----------|------|-------------|---------|
|---------|------|--------|------|--------|-----|-----|---|----|----------|------|-------------|---------|

8/2/22, 12:12 PM

proteins

| Peptide                        | Uniq | -10lgP | Mass      | Length | ppm  | m/z       | z | RT    | Fraction | Scan     | Source File               | Area F1  |
|--------------------------------|------|--------|-----------|--------|------|-----------|---|-------|----------|----------|---------------------------|----------|
| R.HGQGTGELLQVSGIK.V            | N    | 95.91  | 1522.8103 | 15     | 0.4  | 762.4127  | 2 | 39.99 | 3        | F3:11299 | 17112021_RID_2349_DP3.raw | 2.7833E6 |
| K.IQLQNYYSQEIGK.T              | Y    | 93.83  | 1582.7991 | 13     | 0.7  | 792.4073  | 2 | 45.41 | 1        | F1:13679 | 12112021_RID_2349_DP1.raw | 8.8534E6 |
| K.IIALGHSGFFEDQR.I             | N    | 93.42  | 1588.7997 | 14     | 0.8  | 795.4078  | 2 | 47.13 | 2        | F2:13392 | 12112021_RID_2349_DP2.raw | 1.2282E6 |
| K.VLLPSFLATGGDGYHMLK.G         | Y    | 87.27  | 1918.0022 | 18     | 0.7  | 960.0090  | 2 | 60.01 | 3        | F3:17866 | 17112021_RID_2349_DP3.raw |          |
| R.VPTYVPLEMEKTYK.V             | N    | 87.11  | 1696.8745 | 14     | 0.4  | 566.6323  | 3 | 45.65 | 1        | F1:13767 | 12112021_RID_2349_DP1.raw | 5.018E6  |
| K.ASGNPILLNKDIPEDQVVKAQVVK.M   | Y    | 87.11  | 2589.4126 | 24     | 1.2  | 864.1459  | 3 | 45.05 | 1        | F1:13591 | 12112021_RID_2349_DP1.raw | 9.398E6  |
| K.ASGNPILLNKDIPEDQVVKA.A       | Y    | 83.55  | 2049.1106 | 19     | 0.8  | 684.0447  | 3 | 45.02 | 1        | F1:13569 | 12112021_RID_2349_DP1.raw | 3.5624E7 |
| R.QVPVVQAYAFGK.Y               | N    | 78.42  | 1305.7081 | 12     | 0.2  | 653.8615  | 2 | 46.67 | 2        | F2:13272 | 12112021_RID_2349_DP2.raw | 4.2275E6 |
| K.DIPEDQVVKAQVVK.M             | Y    | 77.75  | 1581.8362 | 14     | 1.0  | 791.9261  | 2 | 34.51 | 1        | F1:10105 | 12112021_RID_2349_DP1.raw | 1.479E6  |
| K.QAFEHSVHR.H                  | N    | 75.67  | 1109.5366 | 9      | 0.7  | 555.7760  | 2 | 21.01 | 1        | F1:5462  | 12112021_RID_2349_DP1.raw | 1.4117E6 |
| R.VPTYVPLEMEK.T                | N    | 71.68  | 1304.6686 | 11     | 0.5  | 653.3419  | 2 | 47.31 | 2        | F2:13493 | 12112021_RID_2349_DP2.raw | 8.3497E6 |
| R.MEKVFPAVEGR.V                | N    | 70.69  | 1261.6488 | 11     | 0.2  | 421.5570  | 3 | 35.91 | 1        | F1:10572 | 12112021_RID_2349_DP1.raw | 6.3631E6 |
| R.DEVEELQIHANK.L               | N    | 70.10  | 1423.6943 | 12     | 0.6  | 712.8549  | 2 | 34.19 | 4        | F4:9279  | 17112021_RID_2349_DP4.raw |          |
| K.ASGNPILLNK.D                 | N    | 67.11  | 1025.5869 | 10     | -0.1 | 513.8007  | 2 | 34.04 | 1        | F1:9894  | 12112021_RID_2349_DP1.raw | 2.3772E7 |
| R.VTFLDGTFLFQA.Q               | Y    | 67.07  | 1210.6234 | 11     | 0.9  | 606.3195  | 2 | 72.56 | 1        | F1:22584 | 12112021_RID_2349_DP1.raw | 1.349E5  |
| R.VPTYVPLEM(+15.99)EK.T        | N    | 64.43  | 1320.6635 | 11     | 0.7  | 661.3395  | 2 | 41.27 | 1        | F1:12376 | 12112021_RID_2349_DP1.raw | 5.2823E6 |
| K.ETPVLNPGPYLEFR.D             | N    | 63.99  | 1717.8674 | 15     | 0.3  | 859.9412  | 2 | 55.85 | 4        | F4:16529 | 17112021_RID_2349_DP4.raw |          |
| K.VGIIGYTTK.E                  | N    | 60.94  | 950.5436  | 9      | -0.2 | 476.2790  | 2 | 37.93 | 1        | F1:11149 | 12112021_RID_2349_DP1.raw | 9.0552E6 |
| K.RMEKVFPAVEGR.V               | N    | 60.62  | 1417.7500 | 12     | -0.5 | 473.5904  | 3 | 38.18 | 1        | F1:11332 | 12112021_RID_2349_DP1.raw | 1.0596E6 |
| R.M(+15.99)EKVFPAVEGR.V        | N    | 56.35  | 1277.6438 | 11     | -0.1 | 426.8885  | 3 | 34.90 | 1        | F1:10583 | 12112021_RID_2349_DP1.raw | 4.4201E6 |
| K.VFPAVEGR.V                   | N    | 54.60  | 873.4708  | 8      | 0.2  | 437.7428  | 2 | 33.73 | 1        | F1:9818  | 12112021_RID_2349_DP1.raw | 2.3327E7 |
| R.VPTYVPLEM(+15.99)EKTYK.V     | N    | 53.59  | 1712.8695 | 14     | -0.2 | 571.9637  | 3 | 45.68 | 1        | F1:13801 | 12112021_RID_2349_DP1.raw | 1.6172E6 |
| K.VVYDLSQKPGSR.V               | N    | 53.26  | 1347.7146 | 12     | 0.8  | 674.8651  | 2 | 28.72 | 7        | F7:7430  | 17112021_RID_2349_DP7.raw |          |
| K.ASGNPILLNKD.I                | N    | 52.23  | 1140.6139 | 11     | 0.6  | 571.3146  | 2 | 34.93 | 4        | F4:9472  | 17112021_RID_2349_DP4.raw |          |
| R.VTFLDGTFLFQA.A               | Y    | 52.01  | 1139.5863 | 10     | 0.1  | 570.8005  | 2 | 71.52 | 1        | F1:22214 | 12112021_RID_2349_DP1.raw | 1.731E6  |
| K.VFPAVEGRVTFLD.G              | Y    | 50.74  | 1448.7664 | 13     | 0.1  | 725.3905  | 2 | 58.64 | 1        | F1:18050 | 12112021_RID_2349_DP1.raw | 2.5813E5 |
| K.VFPAVEGRVTFLDGTFLF.Q         | Y    | 49.96  | 1866.9879 | 17     | 1.5  | 934.5026  | 2 | 72.35 | 1        | F1:22539 | 12112021_RID_2349_DP1.raw | 6.8832E5 |
| K.LTTLGVNK.I                   | N    | 48.37  | 844.5018  | 8      | -0.2 | 423.2581  | 2 | 28.18 | 2        | F2:6923  | 12112021_RID_2349_DP2.raw | 1.9323E6 |
| R.VTFLDGTFLFQAQ.L              | Y    | 48.28  | 1338.6819 | 12     | 1.0  | 670.3489  | 2 | 70.39 | 1        | F1:21836 | 12112021_RID_2349_DP1.raw | 2.3504E5 |
| K.DIPEDQVVKA.A                 | Y    | 47.98  | 1041.5342 | 9      | 0.0  | 521.7744  | 2 | 33.23 | 1        | F1:9696  | 12112021_RID_2349_DP1.raw | 6.0307E6 |
| K.VLLPSFLATGGDGYHM(+15.99)LK.G | Y    | 47.16  | 1933.9971 | 18     | 1.6  | 968.0073  | 2 | 55.51 | 4        | F4:16340 | 17112021_RID_2349_DP4.raw |          |
| L.NKDIPEDQVVKA.A               | Y    | 45.22  | 1283.6721 | 11     | 0.5  | 642.8436  | 2 | 26.35 | 1        | F1:7247  | 12112021_RID_2349_DP1.raw | 5.8334E4 |
| K.VLLPSFLATGGD.G               | N    | 44.90  | 1188.6390 | 12     | 0.8  | 1189.6472 | 1 | 70.35 | 1        | F1:21823 | 12112021_RID_2349_DP1.raw | 1.8966E5 |
| R.MEKVFPAVE.G                  | N    | 39.13  | 1048.5262 | 9      | -0.6 | 525.2701  | 2 | 42.65 | 1        | F1:12815 | 12112021_RID_2349_DP1.raw | 2.9669E5 |

G8XQX1.1  
[back to list](#)

| [Protein Coverage](#) | [Supporting Peptides](#) |  
Protein Coverage:

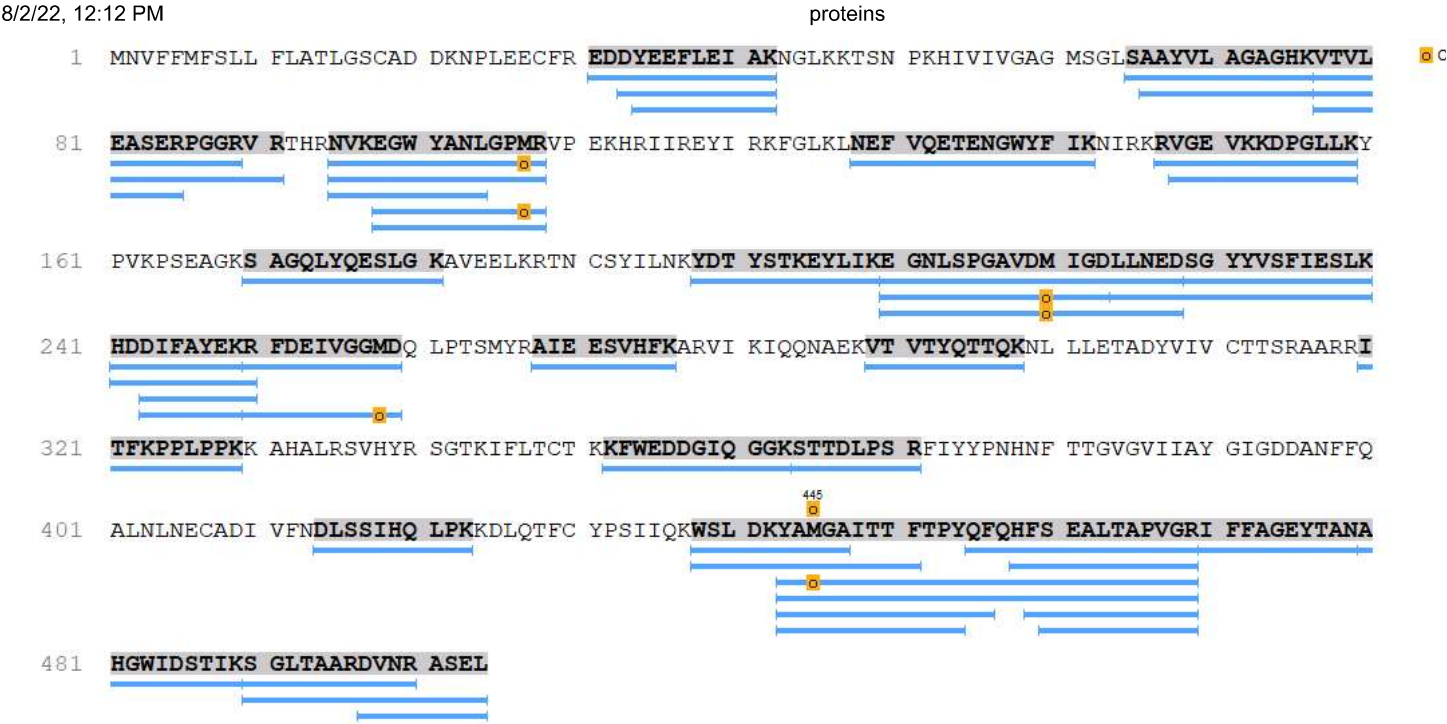

| Peptide                                 | Uniq | -10lgP | Mass      | Length | ppm  | m/z       | z | RT    | Fraction | Scan     | Source File               |
|-----------------------------------------|------|--------|-----------|--------|------|-----------|---|-------|----------|----------|---------------------------|
| K.YAMGAITTFPTYQFQHFSEALTAPVGR.I         | N    | 93.35  | 3003.4587 | 27     | 0.8  | 1002.1609 | 3 | 68.16 | 3        | F3:20530 | 17112021_RID_2349_DP3.raw |
| R.NVKEGWYANLGPMR.V                      | N    | 89.97  | 1633.8035 | 14     | 1.1  | 817.9099  | 2 | 46.58 | 1        | F1:14171 | 12112021_RID_2349_DP1.raw |
| K.SGLTAARDVNRASEL                       | N    | 81.95  | 1558.8063 | 15     | -0.1 | 520.6093  | 3 | 35.16 | 1        | F1:10323 | 12112021_RID_2349_DP1.raw |
| K.YDTYSTKEYLIK.E                        | N    | 80.80  | 1522.7555 | 12     | 0.9  | 762.3857  | 2 | 38.58 | 2        | F2:10545 | 12112021_RID_2349_DP2.raw |
| K.YAM(+15.99)GAITTFPTYQFQHFSEALTAPVGR.I | N    | 80.23  | 3019.4539 | 27     | 0.9  | 1007.4928 | 3 | 64.54 | 3        | F3:19257 | 17112021_RID_2349_DP3.raw |
| K.SAGQLYQESLGK.A                        | N    | 80.13  | 1279.6407 | 12     | 0.1  | 640.8277  | 2 | 34.93 | 1        | F1:10235 | 12112021_RID_2349_DP1.raw |
| K.EGWYANLGPMR.V                         | N    | 74.35  | 1292.5972 | 11     | 0.2  | 647.3060  | 2 | 50.70 | 1        | F1:15490 | 12112021_RID_2349_DP1.raw |
| R.EDDYEEFLEIAK.N                        | N    | 74.11  | 1499.6667 | 12     | 0.7  | 750.8412  | 2 | 59.88 | 5        | F5:17908 | 17112021_RID_2349_DP5.raw |
| R.NVKEGWYANLGPM(+15.99)R.V              | N    | 71.22  | 1649.7983 | 14     | 0.4  | 825.9067  | 2 | 41.24 | 1        | F1:12368 | 12112021_RID_2349_DP1.raw |
| K.EGWYANLGPM(+15.99)R.V                 | N    | 70.55  | 1308.5920 | 11     | 0.5  | 655.3036  | 2 | 44.48 | 3        | F3:12782 | 17112021_RID_2349_DP3.raw |
| K.HDDIFAYEK.R                           | N    | 70.19  | 1136.5138 | 9      | 0.4  | 569.2644  | 2 | 36.68 | 2        | F2:9942  | 12112021_RID_2349_DP2.raw |
| R.VGEVKKDPGLLK.Y                        | N    | 63.88  | 1281.7656 | 12     | -0.3 | 428.2624  | 3 | 28.13 | 1        | F1:8041  | 12112021_RID_2349_DP1.raw |
| L.NEFVQETENGWYFIK.N                     | N    | 63.17  | 1902.8788 | 15     | 0.5  | 952.4471  | 2 | 60.53 | 2        | F2:17717 | 12112021_RID_2349_DP2.raw |
| D.DYEEFLEIAK.N                          | N    | 63.01  | 1255.5972 | 10     | 0.6  | 628.8062  | 2 | 58.64 | 1        | F1:18007 | 12112021_RID_2349_DP1.raw |
| D.SGYVVSFIESLK.H                        | N    | 61.77  | 1391.6973 | 12     | 0.1  | 696.8560  | 2 | 60.36 | 3        | F3:17967 | 17112021_RID_2349_DP3.raw |
| K.EGNLSPGAVDMIGDLLNED.S                 | N    | 61.67  | 1957.8938 | 19     | 0.0  | 979.9542  | 2 | 76.89 | 4        | F4:23445 | 17112021_RID_2349_DP4.raw |
| R.DVNRASEL                              | N    | 60.54  | 902.4457  | 8      | -0.6 | 452.2299  | 2 | 26.74 | 1        | F1:7420  | 12112021_RID_2349_DP1.raw |
| K.VTVLEASERPGR.V                        | N    | 60.35  | 1369.7313 | 13     | -0.1 | 457.5843  | 3 | 29.25 | 1        | F1:8170  | 12112021_RID_2349_DP1.raw |
| K.HDDIFAYEKR.F                          | N    | 60.12  | 1292.6149 | 10     | 0.0  | 431.8789  | 3 | 32.95 | 3        | F3:8849  | 17112021_RID_2349_DP3.raw |
| R.NVKEGWYANL.G                          | N    | 59.21  | 1192.5876 | 10     | -0.3 | 597.3009  | 2 | 47.98 | 1        | F1:14543 | 12112021_RID_2349_DP1.raw |
| K.VTVLEASER.P                           | N    | 58.47  | 1002.5345 | 9      | -0.5 | 502.2743  | 2 | 30.13 | 5        | F5:7870  | 17112021_RID_2349_DP5.raw |
| R.AIEESVHFK.A                           | Y    | 58.30  | 1058.5397 | 9      | -0.1 | 530.2770  | 2 | 29.87 | 7        | F7:7843  | 17112021_RID_2349_DP7.raw |
| K.VTVTYQTQK.N                           | N    | 57.89  | 1167.6135 | 10     | 0.3  | 584.8142  | 2 | 25.60 | 7        | F7:6331  | 17112021_RID_2349_DP7.raw |
| K.SGLTAARDVNR.A                         | N    | 57.18  | 1158.6105 | 11     | -0.1 | 387.2107  | 3 | 21.39 | 1        | F1:5502  | 12112021_RID_2349_DP1.raw |

| Peptide                         | Uniq | -10lgP | Mass      | Length | ppm  | m/z       | z | RT    | Fraction | Scan     | Source File               |
|---------------------------------|------|--------|-----------|--------|------|-----------|---|-------|----------|----------|---------------------------|
| Y.QFQHFSEALTAPVGR.I             | N    | 56.85  | 1686.8478 | 15     | 0.7  | 844.4318  | 2 | 42.64 | 4        | F4:12109 | 17112021_RID_2349_DP4.raw |
| N.AHGWIDSTIK.S                  | N    | 55.64  | 1126.5771 | 10     | 1.1  | 564.2964  | 2 | 35.13 | 3        | F3:9624  | 17112021_RID_2349_DP3.raw |
| K.WSLDKYAMGA.I                  | N    | 55.33  | 1140.5273 | 10     | 0.5  | 571.2712  | 2 | 50.51 | 1        | F1:15333 | 12112021_RID_2349_DP1.raw |
| K.STTDLPSR.F                    | N    | 55.31  | 875.4348  | 8      | 0.5  | 438.7249  | 2 | 22.15 | 1        | F1:5769  | 12112021_RID_2349_DP1.raw |
| D.YEEFLEIAK.N                   | N    | 55.22  | 1140.5702 | 9      | -0.1 | 571.2923  | 2 | 49.00 | 1        | F1:14874 | 12112021_RID_2349_DP1.raw |
| H.FSEALTAPVGR.I                 | N    | 55.11  | 1146.6033 | 11     | 0.5  | 574.3092  | 2 | 39.16 | 5        | F5:11001 | 17112021_RID_2349_DP5.raw |
| R.IFFAGEYTAN.A                  | N    | 54.27  | 1131.5237 | 10     | 0.8  | 1132.5319 | 1 | 55.58 | 1        | F1:16980 | 12112021_RID_2349_DP1.raw |
| R.ITFKPPLPPK.K                  | N    | 54.10  | 1136.6957 | 10     | 0.3  | 379.9059  | 3 | 40.53 | 7        | F7:11518 | 17112021_RID_2349_DP7.raw |
| N.DLSSIHQLPK.K                  | N    | 51.71  | 1136.6189 | 10     | 0.9  | 569.3173  | 2 | 34.51 | 1        | F1:10039 | 12112021_RID_2349_DP1.raw |
| K.EGNLSPGAVDM(+15.99)IGDLLNED.S | N    | 51.30  | 1973.8888 | 19     | 0.5  | 987.9521  | 2 | 67.55 | 4        | F4:20200 | 17112021_RID_2349_DP4.raw |
| S.AAYVLAGAGHK.V                 | N    | 50.59  | 1056.5715 | 11     | 1.1  | 529.2936  | 2 | 24.54 | 3        | F3:6001  | 17112021_RID_2349_DP3.raw |
| D.LLNEDSGYYVSFIESLK.H           | N    | 49.92  | 1975.9778 | 17     | 0.7  | 988.9969  | 2 | 68.81 | 3        | F3:20708 | 17112021_RID_2349_DP3.raw |
| K.RFDEIVGGM(+15.99)D.Q          | N    | 49.15  | 1153.5073 | 10     | 0.1  | 577.7610  | 2 | 38.54 | 3        | F3:10739 | 17112021_RID_2349_DP3.raw |
| D.DIFAYEKR.F                    | N    | 48.19  | 1040.5291 | 8      | 0.1  | 521.2719  | 2 | 35.16 | 3        | F3:9617  | 17112021_RID_2349_DP3.raw |
| K.YAMGAITFTPTY.Q                | N    | 46.88  | 1334.6217 | 12     | 0.9  | 668.3187  | 2 | 64.07 | 4        | F4:19119 | 17112021_RID_2349_DP4.raw |
| K.EGNLSPGAVDM(+15.99)IGD.L      | N    | 46.09  | 1389.6082 | 14     | 0.2  | 695.8115  | 2 | 46.47 | 4        | F4:13379 | 17112021_RID_2349_DP4.raw |
| K.RFDEIVGGMD.Q                  | N    | 45.54  | 1137.5125 | 10     | -0.5 | 569.7632  | 2 | 45.56 | 3        | F3:13157 | 17112021_RID_2349_DP3.raw |
| K.VTVLEASERPGGRVR.T             | N    | 45.40  | 1624.9009 | 15     | 0.3  | 542.6411  | 3 | 30.01 | 1        | F1:8563  | 12112021_RID_2349_DP1.raw |
| K.KFWEDDGIQGGK.S                | N    | 44.74  | 1378.6517 | 12     | -2.0 | 690.3318  | 2 | 35.62 | 7        | F7:9823  | 17112021_RID_2349_DP7.raw |
| Q.HFSEALTAPVGR.I                | N    | 42.43  | 1283.6622 | 12     | 0.5  | 642.8387  | 2 | 34.80 | 4        | F4:9467  | 17112021_RID_2349_DP4.raw |
| K.YAMGAITFTPTYQF.Q              | N    | 41.39  | 1609.7487 | 14     | -0.2 | 805.8814  | 2 | 71.88 | 3        | F3:21650 | 17112021_RID_2349_DP3.raw |
| L.SAAYVLAGAGHK.V                | N    | 40.21  | 1143.6036 | 12     | 0.7  | 572.8095  | 2 | 26.75 | 5        | F5:6718  | 17112021_RID_2349_DP5.raw |
| F.SEALTAPVGR.I                  | N    | 40.05  | 999.5349  | 10     | -0.1 | 500.7746  | 2 | 30.20 | 3        | F3:7936  | 17112021_RID_2349_DP3.raw |
| D.DIFAYEK.R                     | N    | 39.75  | 884.4279  | 7      | 0.8  | 885.4359  | 1 | 41.87 | 4        | F4:11928 | 17112021_RID_2349_DP4.raw |
| K.RVGEVKKDPGLLK.Y               | N    | 39.62  | 1437.8667 | 13     | 1.0  | 480.2967  | 3 | 39.89 | 1        | F1:11650 | 12112021_RID_2349_DP1.raw |
| K.WSLDKYAMGAITTF.T              | N    | 38.72  | 1602.7751 | 14     | 1.3  | 802.3959  | 2 | 67.34 | 3        | F3:20215 | 17112021_RID_2349_DP3.raw |

ACF70483.1  
[back to list](#)  
| [Protein Coverage](#) | [Supporting Peptides](#) |  
Protein Coverage:

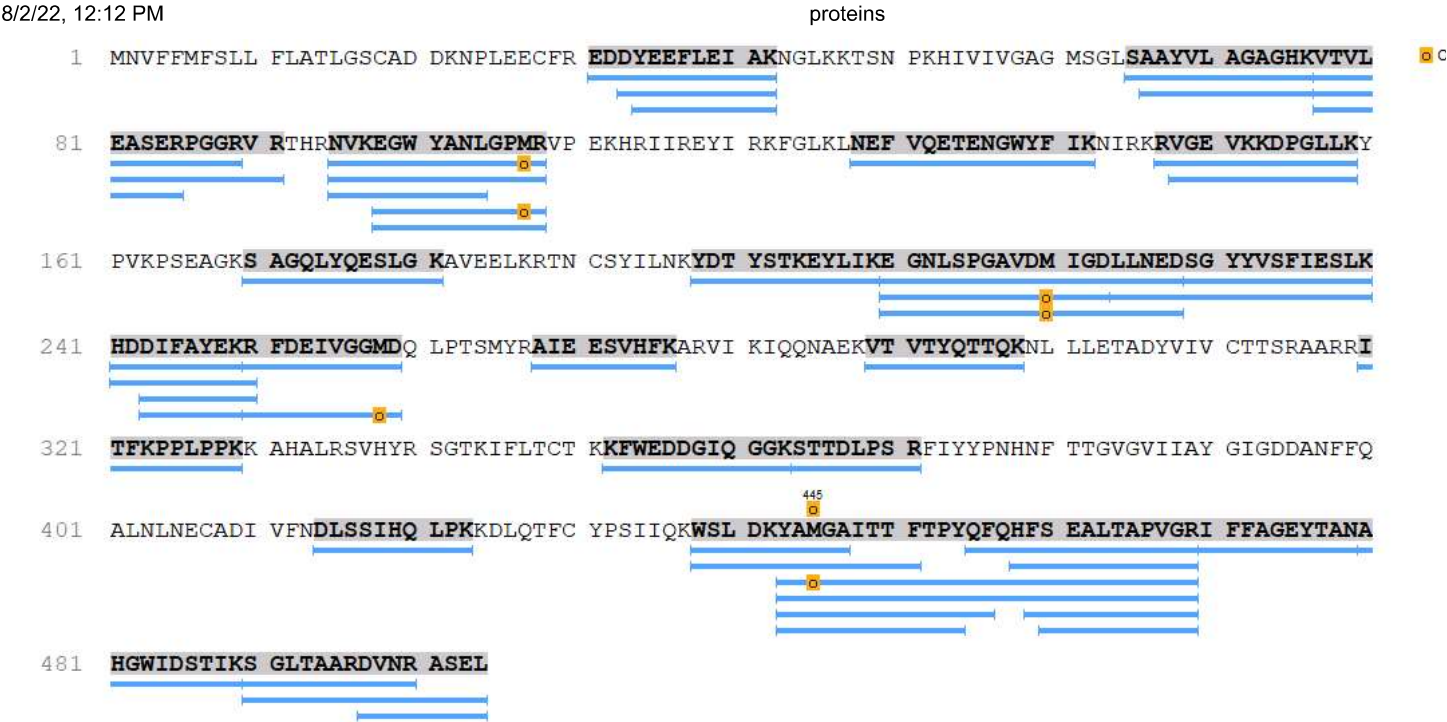

Supporting Peptides:

| Peptide                                 | Uniq | -10lgP | Mass      | Length | ppm  | m/z       | z | RT    | Fraction | Scan     | Source File               |
|-----------------------------------------|------|--------|-----------|--------|------|-----------|---|-------|----------|----------|---------------------------|
| K.YAMGAITTFPTYQFQHFSEALTAPVGR.I         | N    | 93.35  | 3003.4587 | 27     | 0.8  | 1002.1609 | 3 | 68.16 | 3        | F3:20530 | 17112021_RID_2349_DP3.raw |
| R.NVKEGWYANLGPMR.V                      | N    | 89.97  | 1633.8035 | 14     | 1.1  | 817.9099  | 2 | 46.58 | 1        | F1:14171 | 12112021_RID_2349_DP1.raw |
| K.SGLTAARDVNRASEL                       | N    | 81.95  | 1558.8063 | 15     | -0.1 | 520.6093  | 3 | 35.16 | 1        | F1:10323 | 12112021_RID_2349_DP1.raw |
| K.YDTYSTKEYLIK.E                        | N    | 80.80  | 1522.7555 | 12     | 0.9  | 762.3857  | 2 | 38.58 | 2        | F2:10545 | 12112021_RID_2349_DP2.raw |
| K.YAM(+15.99)GAITTFPTYQFQHFSEALTAPVGR.I | N    | 80.23  | 3019.4539 | 27     | 0.9  | 1007.4928 | 3 | 64.54 | 3        | F3:19257 | 17112021_RID_2349_DP3.raw |
| K.SAGQLYQESLGK.A                        | N    | 80.13  | 1279.6407 | 12     | 0.1  | 640.8277  | 2 | 34.93 | 1        | F1:10235 | 12112021_RID_2349_DP1.raw |
| K.EGWYANLGPMR.V                         | N    | 74.35  | 1292.5972 | 11     | 0.2  | 647.3060  | 2 | 50.70 | 1        | F1:15490 | 12112021_RID_2349_DP1.raw |
| R.EDDYEEFLEIAK.N                        | N    | 74.11  | 1499.6667 | 12     | 0.7  | 750.8412  | 2 | 59.88 | 5        | F5:17908 | 17112021_RID_2349_DP5.raw |
| R.NVKEGWYANLGPM(+15.99)R.V              | N    | 71.22  | 1649.7983 | 14     | 0.4  | 825.9067  | 2 | 41.24 | 1        | F1:12368 | 12112021_RID_2349_DP1.raw |
| K.EGWYANLGPM(+15.99)R.V                 | N    | 70.55  | 1308.5920 | 11     | 0.5  | 655.3036  | 2 | 44.48 | 3        | F3:12782 | 17112021_RID_2349_DP3.raw |
| K.HDDIFAYEK.R                           | N    | 70.19  | 1136.5138 | 9      | 0.4  | 569.2644  | 2 | 36.68 | 2        | F2:9942  | 12112021_RID_2349_DP2.raw |
| R.VGEVKKDPGLLK.Y                        | N    | 63.88  | 1281.7656 | 12     | -0.3 | 428.2624  | 3 | 28.13 | 1        | F1:8041  | 12112021_RID_2349_DP1.raw |
| L.NEFVQETENGWYFIK.N                     | N    | 63.17  | 1902.8788 | 15     | 0.5  | 952.4471  | 2 | 60.53 | 2        | F2:17717 | 12112021_RID_2349_DP2.raw |
| D.DYEEFLEIAK.N                          | N    | 63.01  | 1255.5972 | 10     | 0.6  | 628.8062  | 2 | 58.64 | 1        | F1:18007 | 12112021_RID_2349_DP1.raw |
| D.SGYVVSFIESLK.H                        | N    | 61.77  | 1391.6973 | 12     | 0.1  | 696.8560  | 2 | 60.36 | 3        | F3:17967 | 17112021_RID_2349_DP3.raw |
| K.EGNLSPGAVDMIGDLLNED.S                 | N    | 61.67  | 1957.8938 | 19     | 0.0  | 979.9542  | 2 | 76.89 | 4        | F4:23445 | 17112021_RID_2349_DP4.raw |
| R.DVNRASEL                              | N    | 60.54  | 902.4457  | 8      | -0.6 | 452.2299  | 2 | 26.74 | 1        | F1:7420  | 12112021_RID_2349_DP1.raw |
| K.VTVLEASERPGR.V                        | N    | 60.35  | 1369.7313 | 13     | -0.1 | 457.5843  | 3 | 29.25 | 1        | F1:8170  | 12112021_RID_2349_DP1.raw |
| K.HDDIFAYEKR.F                          | N    | 60.12  | 1292.6149 | 10     | 0.0  | 431.8789  | 3 | 32.95 | 3        | F3:8849  | 17112021_RID_2349_DP3.raw |
| R.NVKEGWYANL.G                          | N    | 59.21  | 1192.5876 | 10     | -0.3 | 597.3009  | 2 | 47.98 | 1        | F1:14543 | 12112021_RID_2349_DP1.raw |
| K.VTVLEASER.P                           | N    | 58.47  | 1002.5345 | 9      | -0.5 | 502.2743  | 2 | 30.13 | 5        | F5:7870  | 17112021_RID_2349_DP5.raw |
| R.AIEESVHFK.A                           | Y    | 58.30  | 1058.5397 | 9      | -0.1 | 530.2770  | 2 | 29.87 | 7        | F7:7843  | 17112021_RID_2349_DP7.raw |
| K.VTVTYQTTQK.N                          | N    | 57.89  | 1167.6135 | 10     | 0.3  | 584.8142  | 2 | 25.60 | 7        | F7:6331  | 17112021_RID_2349_DP7.raw |
| K.SGLTAARDVNR.A                         | N    | 57.18  | 1158.6105 | 11     | -0.1 | 387.2107  | 3 | 21.39 | 1        | F1:5502  | 12112021_RID_2349_DP1.raw |

| Peptide                         | Uniq | -10lgP | Mass      | Length | ppm  | m/z       | z | RT    | Fraction | Scan     | Source File               |
|---------------------------------|------|--------|-----------|--------|------|-----------|---|-------|----------|----------|---------------------------|
| Y.QFQHFSEALTAPVGR.I             | N    | 56.85  | 1686.8478 | 15     | 0.7  | 844.4318  | 2 | 42.64 | 4        | F4:12109 | 17112021_RID_2349_DP4.raw |
| N.AHGWDSTIK.S                   | N    | 55.64  | 1126.5771 | 10     | 1.1  | 564.2964  | 2 | 35.13 | 3        | F3:9624  | 17112021_RID_2349_DP3.raw |
| K.WSLDKYAMGA.I                  | N    | 55.33  | 1140.5273 | 10     | 0.5  | 571.2712  | 2 | 50.51 | 1        | F1:15333 | 12112021_RID_2349_DP1.raw |
| K.STTDLPSR.F                    | N    | 55.31  | 875.4348  | 8      | 0.5  | 438.7249  | 2 | 22.15 | 1        | F1:5769  | 12112021_RID_2349_DP1.raw |
| D.YEEFLEIAK.N                   | N    | 55.22  | 1140.5702 | 9      | -0.1 | 571.2923  | 2 | 49.00 | 1        | F1:14874 | 12112021_RID_2349_DP1.raw |
| H.FSEALTAPVGR.I                 | N    | 55.11  | 1146.6033 | 11     | 0.5  | 574.3092  | 2 | 39.16 | 5        | F5:11001 | 17112021_RID_2349_DP5.raw |
| R.IFFAGEYTAN.A                  | N    | 54.27  | 1131.5237 | 10     | 0.8  | 1132.5319 | 1 | 55.58 | 1        | F1:16980 | 12112021_RID_2349_DP1.raw |
| R.ITFKPPLPPK.K                  | N    | 54.10  | 1136.6957 | 10     | 0.3  | 379.9059  | 3 | 40.53 | 7        | F7:11518 | 17112021_RID_2349_DP7.raw |
| N.DLSSIHQLPK.K                  | N    | 51.71  | 1136.6189 | 10     | 0.9  | 569.3173  | 2 | 34.51 | 1        | F1:10039 | 12112021_RID_2349_DP1.raw |
| K.EGNLSPGAVDM(+15.99)IGDLLNED.S | N    | 51.30  | 1973.8888 | 19     | 0.5  | 987.9521  | 2 | 67.55 | 4        | F4:20200 | 17112021_RID_2349_DP4.raw |
| S.AAYVLAGAGHK.V                 | N    | 50.59  | 1056.5715 | 11     | 1.1  | 529.2936  | 2 | 24.54 | 3        | F3:6001  | 17112021_RID_2349_DP3.raw |
| D.LLNEDSGYYVSFIESLK.H           | N    | 49.92  | 1975.9778 | 17     | 0.7  | 988.9969  | 2 | 68.81 | 3        | F3:20708 | 17112021_RID_2349_DP3.raw |
| K.RFDEIVGGM(+15.99)D.Q          | N    | 49.15  | 1153.5073 | 10     | 0.1  | 577.7610  | 2 | 38.54 | 3        | F3:10739 | 17112021_RID_2349_DP3.raw |
| D.DIFAYEKR.F                    | N    | 48.19  | 1040.5291 | 8      | 0.1  | 521.2719  | 2 | 35.16 | 3        | F3:9617  | 17112021_RID_2349_DP3.raw |
| K.YAMGAITFTPTY.Q                | N    | 46.88  | 1334.6217 | 12     | 0.9  | 668.3187  | 2 | 64.07 | 4        | F4:19119 | 17112021_RID_2349_DP4.raw |
| K.EGNLSPGAVDM(+15.99)IGD.L      | N    | 46.09  | 1389.6082 | 14     | 0.2  | 695.8115  | 2 | 46.47 | 4        | F4:13379 | 17112021_RID_2349_DP4.raw |
| K.RFDEIVGGMD.Q                  | N    | 45.54  | 1137.5125 | 10     | -0.5 | 569.7632  | 2 | 45.56 | 3        | F3:13157 | 17112021_RID_2349_DP3.raw |
| K.VTVLEASERPGGRVR.T             | N    | 45.40  | 1624.9009 | 15     | 0.3  | 542.6411  | 3 | 30.01 | 1        | F1:8563  | 12112021_RID_2349_DP1.raw |
| K.KFWEDDGIQGGK.S                | N    | 44.74  | 1378.6517 | 12     | -2.0 | 690.3318  | 2 | 35.62 | 7        | F7:9823  | 17112021_RID_2349_DP7.raw |
| Q.HFSEALTAPVGR.I                | N    | 42.43  | 1283.6622 | 12     | 0.5  | 642.8387  | 2 | 34.80 | 4        | F4:9467  | 17112021_RID_2349_DP4.raw |
| K.YAMGAITFTPTYQF.Q              | N    | 41.39  | 1609.7487 | 14     | -0.2 | 805.8814  | 2 | 71.88 | 3        | F3:21650 | 17112021_RID_2349_DP3.raw |
| L.SAAYVLAGAGHK.V                | N    | 40.21  | 1143.6036 | 12     | 0.7  | 572.8095  | 2 | 26.75 | 5        | F5:6718  | 17112021_RID_2349_DP5.raw |
| F.SEALTAPVGR.I                  | N    | 40.05  | 999.5349  | 10     | -0.1 | 500.7746  | 2 | 30.20 | 3        | F3:7936  | 17112021_RID_2349_DP3.raw |
| D.DIFAYEK.R                     | N    | 39.75  | 884.4279  | 7      | 0.8  | 885.4359  | 1 | 41.87 | 4        | F4:11928 | 17112021_RID_2349_DP4.raw |
| K.RVGEVKKDPGLLK.Y               | N    | 39.62  | 1437.8667 | 13     | 1.0  | 480.2967  | 3 | 39.89 | 1        | F1:11650 | 12112021_RID_2349_DP1.raw |
| K.WSLDKYAMGAITTF.T              | N    | 38.72  | 1602.7751 | 14     | 1.3  | 802.3959  | 2 | 67.34 | 3        | F3:20215 | 17112021_RID_2349_DP3.raw |

TRINITY\_DN0  
[back to list](#)  
| [Protein Coverage](#) | [Supporting Peptides](#) |  
Protein Coverage:

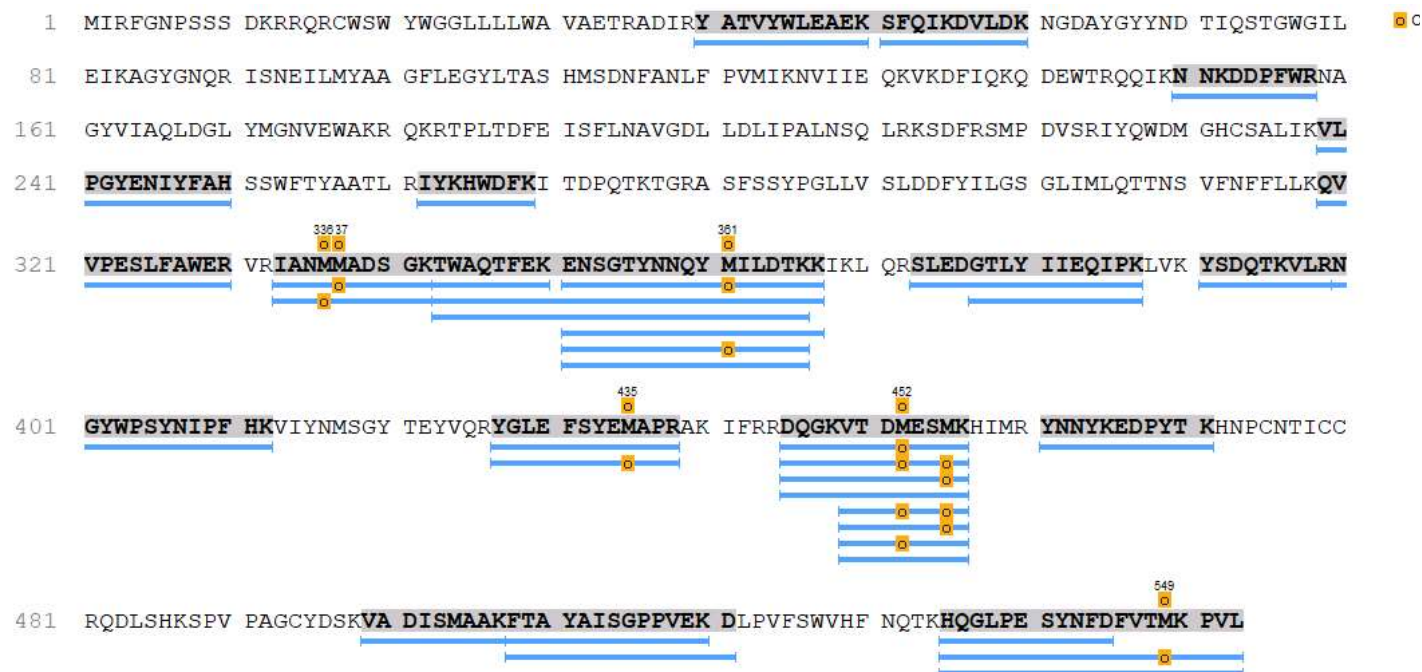

## Supporting Peptides:

| Peptide                          | Uniq | -10lgP | Mass      | Length | ppm  | m/z       | z | RT    | Fraction | Scan     | Source File               | Area F1  |
|----------------------------------|------|--------|-----------|--------|------|-----------|---|-------|----------|----------|---------------------------|----------|
| R.SLEDGTLYIIEQIPK.L              | N    | 90.40  | 1717.9138 | 15     | 0.5  | 859.9646  | 2 | 67.04 | 2        | F2:19818 | 12112021_RID_2349_DP2.raw | 1.408E6  |
| K.ENS GTYNNQYMILDTK.K            | N    | 89.12  | 1889.8466 | 16     | 0.8  | 945.9313  | 2 | 45.52 | 2        | F2:12882 | 12112021_RID_2349_DP2.raw |          |
| K.FTAYAISGPPVEK.D                | Y    | 88.93  | 1378.7133 | 13     | 0.3  | 690.3641  | 2 | 43.87 | 2        | F2:12308 | 12112021_RID_2349_DP2.raw | 1.5569E6 |
| R.YGLEFSYEMAPR.A                 | Y    | 88.54  | 1461.6598 | 12     | 0.5  | 731.8375  | 2 | 55.35 | 2        | F2:16085 | 12112021_RID_2349_DP2.raw | 2.0566E6 |
| R.YGLEFSYEM(+15.99)APR.A         | Y    | 85.59  | 1477.6547 | 12     | 0.8  | 739.8352  | 2 | 48.84 | 2        | F2:14018 | 12112021_RID_2349_DP2.raw |          |
| K.QVVPESLFAWER.V                 | Y    | 81.73  | 1459.7460 | 12     | 0.3  | 730.8805  | 2 | 59.87 | 2        | F2:17521 | 12112021_RID_2349_DP2.raw | 8.9291E6 |
| R.IANMM(+15.99)ADSGK.T           | N    | 76.74  | 1052.4630 | 10     | -0.3 | 527.2386  | 2 | 24.17 | 2        | F2:6829  | 12112021_RID_2349_DP2.raw | 9.0092E6 |
| K.TWAQTFEKENS GTYNNQYMILDTK.K    | Y    | 75.94  | 2881.3228 | 24     | 0.0  | 961.4482  | 3 | 54.25 | 2        | F2:15686 | 12112021_RID_2349_DP2.raw |          |
| R.YNNYKEDPYTK.H                  | Y    | 75.77  | 1433.6462 | 11     | 1.1  | 717.8312  | 2 | 23.44 | 3        | F3:5597  | 17112021_RID_2349_DP3.raw | 2.3721E6 |
| R.IANM(+15.99)MADSGK.T           | N    | 75.38  | 1052.4630 | 10     | -0.3 | 527.2386  | 2 | 24.17 | 2        | F2:6725  | 12112021_RID_2349_DP2.raw |          |
| R.DQGKVTDMESMK.H                 | N    | 72.75  | 1367.6061 | 12     | 0.5  | 684.8107  | 2 | 27.78 | 2        | F2:6747  | 12112021_RID_2349_DP2.raw |          |
| R.YATVYWLEAEK.S                  | N    | 72.57  | 1371.6710 | 11     | 0.7  | 686.8433  | 2 | 51.85 | 5        | F5:15257 | 17112021_RID_2349_DP5.raw |          |
| K.HQGLPESYNDFVMTM(+15.99)KPVL    | N    | 71.29  | 2237.0828 | 19     | 0.8  | 746.7021  | 3 | 59.87 | 2        | F2:17492 | 12112021_RID_2349_DP2.raw |          |
| K.HQGLPESYNDFVMTMKPVL            | N    | 70.10  | 2221.0876 | 19     | 0.3  | 1111.5514 | 2 | 65.61 | 2        | F2:19349 | 12112021_RID_2349_DP2.raw |          |
| K.ENS GTYNNQYM(+15.99)ILDTK.K    | N    | 68.81  | 1905.8414 | 16     | 0.6  | 953.9286  | 2 | 41.00 | 2        | F2:11307 | 12112021_RID_2349_DP2.raw |          |
| K.FTAYAISGPPVEKD.L               | Y    | 67.71  | 1493.7401 | 14     | 0.6  | 747.8778  | 2 | 44.70 | 3        | F3:12805 | 17112021_RID_2349_DP3.raw |          |
| R.NGYWPSYNIPFHK.V                | Y    | 67.54  | 1621.7677 | 13     | 1.2  | 811.8921  | 2 | 51.95 | 2        | F2:14850 | 12112021_RID_2349_DP2.raw |          |
| R.DQGKVTDMESM(+15.99)K.H         | N    | 66.01  | 1383.6010 | 12     | 0.7  | 692.8082  | 2 | 27.71 | 2        | F2:6798  | 12112021_RID_2349_DP2.raw |          |
| K.VADISMAAK.F                    | Y    | 62.72  | 904.4688  | 9      | 0.4  | 453.2418  | 2 | 29.56 | 2        | F2:7416  | 12112021_RID_2349_DP2.raw | 2.873E5  |
| K.YSDQTKVLR.N                    | N    | 60.88  | 1108.5876 | 9      | -0.4 | 555.3009  | 2 | 23.23 | 1        | F1:6160  | 12112021_RID_2349_DP1.raw | 4.0413E6 |
| R.DQGKVTDM(+15.99)ESM(+15.99)K.H | N    | 60.55  | 1399.5959 | 12     | -0.3 | 700.8051  | 2 | 27.86 | 2        | F2:6821  | 12112021_RID_2349_DP2.raw |          |
| K.TWAQTFEK.E                     | Y    | 59.18  | 1009.4869 | 8      | 0.9  | 505.7512  | 2 | 37.49 | 2        | F2:10261 | 12112021_RID_2349_DP2.raw |          |
| R.DQGKVTDM(+15.99)ESMK.H         | N    | 55.19  | 1383.6010 | 12     | 0.0  | 692.8077  | 2 | 19.49 | 2        | F2:3974  | 12112021_RID_2349_DP2.raw |          |

8/2/22, 12:12 PM

proteins

| Peptide                       | Uniq | -10lgP | Mass      | Length | ppm  | m/z       | z | RT    | Fraction | Scan     | Source File               | Area F1 |
|-------------------------------|------|--------|-----------|--------|------|-----------|---|-------|----------|----------|---------------------------|---------|
| K.ENSGTYNNQYMILDTKK.I         | N    | 48.36  | 2017.9415 | 17     | 0.5  | 673.6548  | 3 | 39.15 | 2        | F2:10720 | 12112021_RID_2349_DP2.raw |         |
| D.GTLYIIEQIPK.L               | N    | 47.53  | 1273.7281 | 11     | 0.8  | 637.8719  | 2 | 53.61 | 4        | F4:15815 | 17112021_RID_2349_DP4.raw |         |
| K.TWAQTFEKENSGTYNNQYMILDTKK.I | Y    | 47.17  | 3009.4177 | 25     | 0.8  | 1004.1473 | 3 | 51.07 | 2        | F2:14750 | 12112021_RID_2349_DP2.raw |         |
| K.ENSGTYNNQYM(+15.99)ILDTKK.I | N    | 47.15  | 2033.9364 | 17     | 0.0  | 678.9861  | 3 | 39.23 | 2        | F2:10730 | 12112021_RID_2349_DP2.raw |         |
| K.SFQIKDVLDK.N                | Y    | 46.69  | 1191.6499 | 10     | 0.9  | 596.8328  | 2 | 44.01 | 5        | F5:12690 | 17112021_RID_2349_DP5.raw |         |
| K.VLPGYENIYFAH.S              | N    | 46.58  | 1421.6979 | 12     | 0.6  | 711.8566  | 2 | 53.52 | 2        | F2:15534 | 12112021_RID_2349_DP2.raw |         |
| K.VTDM(+15.99)ESMK.H          | N    | 45.53  | 955.3990  | 8      | -0.3 | 478.7067  | 2 | 24.77 | 2        | F2:5754  | 12112021_RID_2349_DP2.raw |         |
| K.HQGLPESYNFD.F               | N    | 44.27  | 1305.5625 | 11     | -0.5 | 653.7882  | 2 | 42.77 | 2        | F2:11932 | 12112021_RID_2349_DP2.raw |         |
| K.VTDMESM(+15.99)K.H          | N    | 43.61  | 955.3990  | 8      | -0.3 | 478.7067  | 2 | 24.77 | 2        | F2:5660  | 12112021_RID_2349_DP2.raw |         |
| K.VTDM(+15.99)ESM(+15.99)K.H  | N    | 42.57  | 971.3940  | 8      | -0.2 | 486.7042  | 2 | 24.80 | 2        | F2:5663  | 12112021_RID_2349_DP2.raw |         |
| R.IYKHWDKF.I                  | Y    | 42.43  | 1135.5814 | 8      | 0.2  | 379.5345  | 3 | 39.94 | 2        | F2:10734 | 12112021_RID_2349_DP2.raw |         |
| K.NNKDDPFWR.N                 | N    | 41.45  | 1190.5469 | 9      | 0.5  | 596.2810  | 2 | 35.13 | 5        | F5:9629  | 17112021_RID_2349_DP5.raw |         |
| K.VTDMESMK.H                  | N    | 39.74  | 939.4042  | 8      | 0.0  | 470.7094  | 2 | 24.77 | 2        | F2:5674  | 12112021_RID_2349_DP2.raw |         |

TRINITY\_DN132  
[back to list](#)

[Protein Coverage](#) | [Supporting Peptides](#) |  
Protein Coverage:

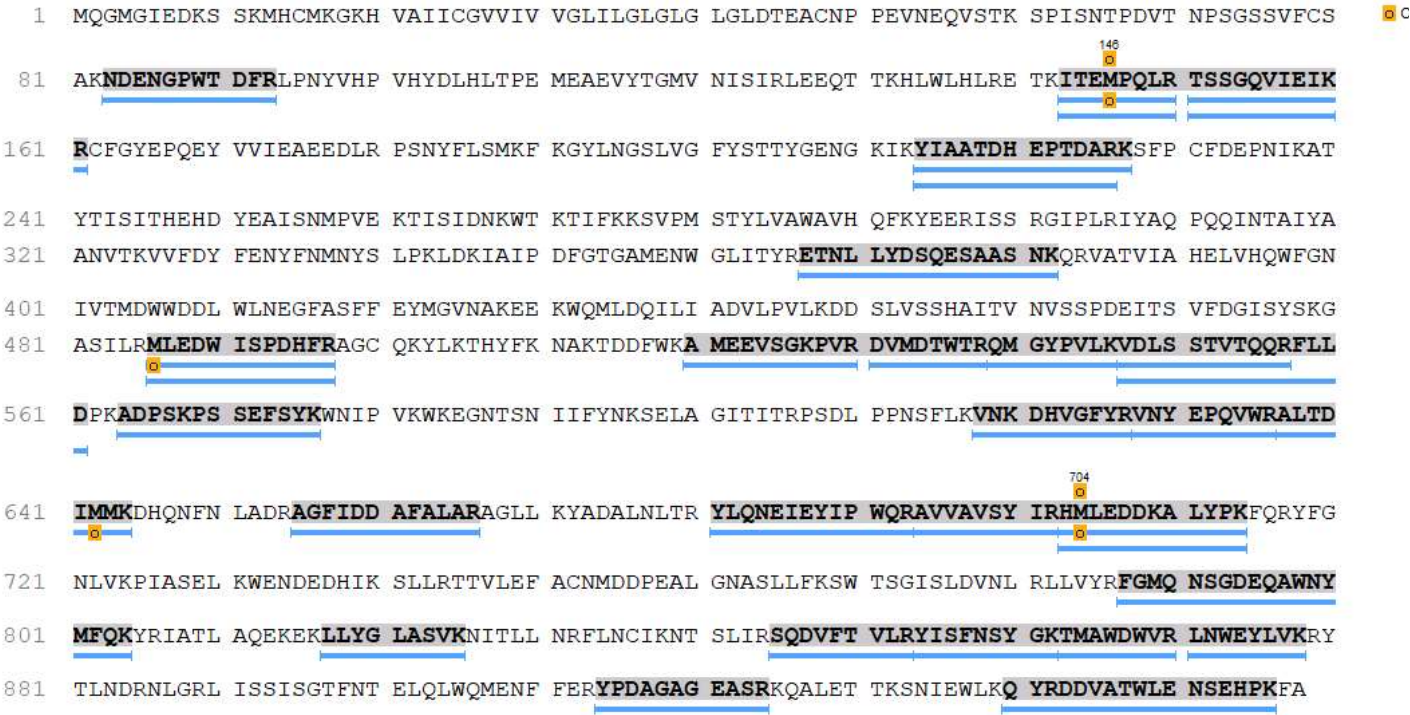

Supporting Peptides:

| Peptide              | Uniq | -10lgP | Mass      | Length | ppm | m/z      | z | RT    | Fraction | Scan     | Source File               | Area F1  | Area F  |
|----------------------|------|--------|-----------|--------|-----|----------|---|-------|----------|----------|---------------------------|----------|---------|
| R.AGFIDDAFALAR.A     | Y    | 82.36  | 1265.6404 | 12     | 0.1 | 633.8275 | 2 | 61.37 | 1        | F1:18887 | 12112021_RID_2349_DP1.raw | 5.6662E6 | 2.7487E |
| R.YLQNEIEYIPWQR.A    | Y    | 81.85  | 1750.8678 | 13     | 0.8 | 876.4419 | 2 | 57.41 | 1        | F1:17599 | 12112021_RID_2349_DP1.raw | 4.2599E6 | 1.9498E |
| R.ETNLLYDSQESAASNK.Q | Y    | 79.61  | 1768.8115 | 16     | 1.0 | 885.4139 | 2 | 37.10 | 2        | F2:10076 | 12112021_RID_2349_DP2.raw | 2.2867E5 | 2.6048E |
| K.YIAATDHEPTDAR.K    | Y    | 77.36  | 1458.6738 | 13     | 0.8 | 730.3448 | 2 | 24.63 | 1        | F1:6617  | 12112021_RID_2349_DP1.raw | 5.1544E5 |         |
| R.HMLEDDKALYPK.F     | Y    | 74.41  | 1458.7177 | 12     | 0.1 | 487.2466 | 3 | 38.63 | 1        | F1:11459 | 12112021_RID_2349_DP1.raw | 1.8307E6 |         |
| K.NDENGPTDFR.L       | Y    | 73.51  | 1349.5636 | 11     | 0.3 | 675.7893 | 2 | 46.11 | 1        | F1:13951 | 12112021_RID_2349_DP1.raw | 3.5973E5 | 5.0695E |

total 32

| Peptide                  | Uniq | -10lgP | Mass      | Length | ppm  | m/z       | z | RT    | Fraction | Scan     | Source File               | Area F1  | Area F  |
|--------------------------|------|--------|-----------|--------|------|-----------|---|-------|----------|----------|---------------------------|----------|---------|
| K.YIAATDHEPTDARK.S       | Y    | 69.82  | 1586.7688 | 14     | 0.7  | 794.3922  | 2 | 21.59 | 1        | F1:5582  | 12112021_RID_2349_DP1.raw | 3.4793E6 |         |
| R.MLEDWISPDHFR.A         | Y    | 67.50  | 1544.7081 | 12     | 1.1  | 773.3622  | 2 | 54.12 | 1        | F1:16564 | 12112021_RID_2349_DP1.raw | 1.5051E5 |         |
| R.FGMQNSGDEQAWNMFQK.Y    | Y    | 66.58  | 2179.9092 | 18     | -0.2 | 1090.9617 | 2 | 58.16 | 3        | F3:17233 | 17112021_RID_2349_DP3.raw |          | 3.2503E |
| R.SQDVFTVLR.Y            | Y    | 66.02  | 1063.5662 | 9      | -0.4 | 532.7902  | 2 | 47.74 | 1        | F1:14400 | 12112021_RID_2349_DP1.raw | 1.7467E6 | 2.2202E |
| K.VDLSSTVTQQR.F          | Y    | 65.72  | 1232.6361 | 11     | 4.7  | 617.3282  | 2 | 32.63 | 2        | F2:8691  | 12112021_RID_2349_DP2.raw | 4.1055E7 | 6.9159E |
| R.VNYEPQVWR.A            | Y    | 64.09  | 1189.5880 | 9      | -0.2 | 595.8011  | 2 | 41.81 | 1        | F1:12508 | 12112021_RID_2349_DP1.raw | 5.2545E6 |         |
| R.DVMDTWTR.Q             | Y    | 63.49  | 1022.4492 | 8      | 0.2  | 512.2319  | 2 | 43.94 | 1        | F1:13265 | 12112021_RID_2349_DP1.raw | 3.9974E5 |         |
| R.YPDAGAGEASR.K          | Y    | 63.05  | 1092.4835 | 11     | 0.3  | 547.2492  | 2 | 22.63 | 1        | F1:5917  | 12112021_RID_2349_DP1.raw | 3.2708E5 | 3.7776E |
| R.AVVAVSYIR.H            | Y    | 61.55  | 976.5706  | 9      | -0.4 | 489.2924  | 2 | 40.15 | 1        | F1:11950 | 12112021_RID_2349_DP1.raw | 5.7775E6 | 1.9065E |
| K.VNKDHVGFYR.V           | Y    | 60.88  | 1233.6254 | 10     | 0.0  | 617.8199  | 2 | 29.25 | 1        | F1:8313  | 12112021_RID_2349_DP1.raw | 2.0841E6 |         |
| R.TSSGQVIEIKR.C          | Y    | 59.17  | 1216.6775 | 11     | 0.0  | 609.3460  | 2 | 27.07 | 1        | F1:7509  | 12112021_RID_2349_DP1.raw | 2.1937E6 |         |
| K.AMEEVSGKPVR.D          | Y    | 59.15  | 1201.6124 | 11     | 0.6  | 601.8138  | 2 | 21.99 | 1        | F1:5707  | 12112021_RID_2349_DP1.raw | 2.2834E5 |         |
| K.ITEMPQLR.T             | Y    | 58.29  | 986.5219  | 8      | -0.1 | 494.2682  | 2 | 37.37 | 1        | F1:11034 | 12112021_RID_2349_DP1.raw | 1.9443E6 |         |
| K.TMAWDWVR.L             | Y    | 54.89  | 1063.4910 | 8      | 0.1  | 532.7528  | 2 | 53.75 | 3        | F3:15730 | 17112021_RID_2349_DP3.raw |          |         |
| R.TSSGQVIEIK.R           | Y    | 54.73  | 1060.5764 | 10     | -0.3 | 531.2953  | 2 | 31.42 | 4        | F4:8292  | 17112021_RID_2349_DP4.raw | 2.0041E5 |         |
| R.QMGYPVLK.V             | Y    | 54.53  | 934.4946  | 8      | -0.5 | 468.2543  | 2 | 38.30 | 1        | F1:11404 | 12112021_RID_2349_DP1.raw | 2.02E6   |         |
| K.QYRDDVATWLENSEHPK.F    | Y    | 53.56  | 2086.9707 | 17     | 0.5  | 696.6646  | 3 | 46.31 | 3        | F3:13434 | 17112021_RID_2349_DP3.raw |          |         |
| R.YISFNSYGK.T            | Y    | 51.64  | 1077.5131 | 9      | -0.5 | 539.7635  | 2 | 39.29 | 1        | F1:11645 | 12112021_RID_2349_DP1.raw | 8.8725E5 |         |
| K.ITEM(+15.99)PQLR.T     | Y    | 49.55  | 1002.5168 | 8      | 0.8  | 502.2661  | 2 | 37.31 | 1        | F1:10990 | 12112021_RID_2349_DP1.raw | 8.909E5  |         |
| R.M(+15.99)LEDWISPDHFR.A | Y    | 47.01  | 1560.7031 | 12     | 1.0  | 781.3596  | 2 | 51.01 | 1        | F1:15476 | 12112021_RID_2349_DP1.raw | 6.1745E4 |         |
| R.ALTDIM(+15.99)MK.D     | Y    | 47.00  | 937.4613  | 8      | 0.1  | 469.7380  | 2 | 44.85 | 1        | F1:13477 | 12112021_RID_2349_DP1.raw | 6.7217E4 |         |
| R.LNWEYLVK.R             | Y    | 44.24  | 1063.5702 | 8      | 0.0  | 532.7924  | 2 | 53.65 | 3        | F3:15847 | 17112021_RID_2349_DP3.raw |          |         |
| K.ADPSKPSSEFSYK.W        | Y    | 42.02  | 1441.6725 | 13     | 0.0  | 721.8435  | 2 | 29.31 | 1        | F1:8282  | 12112021_RID_2349_DP1.raw | 1.8949E5 |         |
| K.VDLSSTVTQQRFLLD.P      | Y    | 41.88  | 1720.8995 | 15     | 0.1  | 861.4572  | 2 | 57.49 | 1        | F1:17638 | 12112021_RID_2349_DP1.raw | 6.4276E4 |         |
| K.LLYGLASVK.N            | Y    | 41.79  | 962.5800  | 9      | 0.3  | 482.2974  | 2 | 45.33 | 3        | F3:13034 | 17112021_RID_2349_DP3.raw |          |         |
| R.HM(+15.99)LEDDKALYPK.F | Y    | 40.30  | 1474.7125 | 12     | 0.3  | 492.5783  | 3 | 35.26 | 1        | F1:10364 | 12112021_RID_2349_DP1.raw | 7.7591E5 |         |

total 32

TRINITY\_DN441  
[back to list](#)

| [Protein Coverage](#) | [Supporting Peptides](#) |  
Protein Coverage:

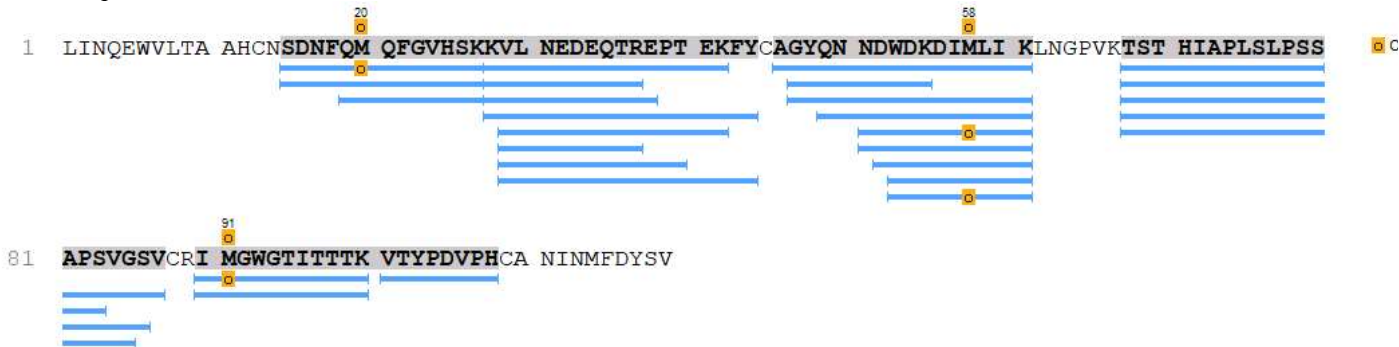

Supporting Peptides:

| Peptide | Uniq | -10lgP | Mass | Length | ppm | m/z | z | RT | Fraction | Scan | Source File | Area F1 | Area F2 |
|---------|------|--------|------|--------|-----|-----|---|----|----------|------|-------------|---------|---------|
|---------|------|--------|------|--------|-----|-----|---|----|----------|------|-------------|---------|---------|

total

| Peptide                   | Uniq | -10lgP | Mass      | Length | ppm  | m/z      | z | RT    | Fraction | Scan     | Source File               | Area F1  | Area F2  |
|---------------------------|------|--------|-----------|--------|------|----------|---|-------|----------|----------|---------------------------|----------|----------|
| K.KVLNEDEQTREPTEK.F       | Y    | 86.02  | 1814.9010 | 15     | 0.9  | 908.4586 | 2 | 20.05 | 3        | F3:4488  | 17112021_RID_2349_DP3.raw | 1.2849E6 | 1.492E6  |
| K.VLNEDEQTREPTEK.F        | Y    | 84.29  | 1686.8060 | 14     | 0.1  | 844.4104 | 2 | 21.98 | 3        | F3:5114  | 17112021_RID_2349_DP3.raw | 4.6932E5 | 8.6582E5 |
| R.IMGWGTITTTK.V           | N    | 78.23  | 1207.6271 | 11     | -0.4 | 604.8206 | 2 | 47.11 | 3        | F3:13741 | 17112021_RID_2349_DP3.raw | 1.7839E6 | 2.7374E7 |
| R.IM(+15.99)GWGTITTTK.V   | N    | 67.99  | 1223.6221 | 11     | 0.3  | 612.8185 | 2 | 40.75 | 2        | F2:11290 | 12112021_RID_2349_DP2.raw | 7.1945E5 | 1.2257E7 |
| K.TSTHIAPLSLPSSAPSVG.S    | Y    | 64.26  | 1720.8995 | 18     | 0.0  | 861.4570 | 2 | 49.46 | 4        | F4:14366 | 17112021_RID_2349_DP4.raw |          |          |
| K.VLNEDEQTR.E             | N    | 63.83  | 1102.5254 | 9      | 0.5  | 552.2703 | 2 | 19.87 | 4        | F4:4313  | 17112021_RID_2349_DP4.raw |          |          |
| A.GYQNNDWDKDIMLIK.L       | Y    | 60.88  | 1851.8826 | 15     | 0.1  | 926.9486 | 2 | 52.32 | 4        | F4:15363 | 17112021_RID_2349_DP4.raw |          |          |
| K.TSTHIAPLSLPSS.A         | N    | 60.21  | 1309.6877 | 13     | -0.1 | 655.8511 | 2 | 44.76 | 4        | F4:12858 | 17112021_RID_2349_DP4.raw |          |          |
| K.TSTHIAPLSLPSSAPSVGSV.C  | Y    | 59.73  | 1907.0000 | 20     | -0.1 | 954.5072 | 2 | 53.14 | 4        | F4:15583 | 17112021_RID_2349_DP4.raw |          |          |
| D.WDKDIMLIK.L             | N    | 57.12  | 1160.6263 | 9      | -0.1 | 581.3204 | 2 | 46.64 | 2        | F2:13338 | 12112021_RID_2349_DP2.raw | 2.1169E5 | 9.915E6  |
| N.DWDKDIMLIK.L            | Y    | 56.94  | 1275.6533 | 10     | 0.0  | 638.8339 | 2 | 53.04 | 4        | F4:15596 | 17112021_RID_2349_DP4.raw |          |          |
| K.KVLNEDEQTR.E            | N    | 55.31  | 1230.6204 | 10     | 0.8  | 616.3179 | 2 | 16.73 | 4        | F4:3273  | 17112021_RID_2349_DP4.raw |          |          |
| N.SDNFQMQFGVHSK.K         | N    | 55.26  | 1523.6827 | 13     | 0.6  | 762.8491 | 2 | 41.31 | 4        | F4:11754 | 17112021_RID_2349_DP4.raw |          |          |
| N.NDWDKDIMLIK.L           | Y    | 53.12  | 1389.6962 | 11     | -0.9 | 695.8547 | 2 | 51.77 | 4        | F4:15198 | 17112021_RID_2349_DP4.raw |          |          |
| D.WDKDIM(+15.99)LIK.L     | N    | 52.20  | 1176.6212 | 9      | -0.2 | 589.3177 | 2 | 41.27 | 2        | F2:11445 | 12112021_RID_2349_DP2.raw |          | 6.6323E6 |
| C.AGYQNNDWDKDIMLIK.L      | Y    | 50.85  | 1922.9197 | 16     | 0.5  | 641.9808 | 3 | 52.44 | 4        | F4:15407 | 17112021_RID_2349_DP4.raw |          |          |
| K.TSTHIAPLSLPSSAPS.V      | Y    | 49.77  | 1564.8097 | 16     | 0.1  | 783.4122 | 2 | 45.91 | 5        | F5:13244 | 17112021_RID_2349_DP5.raw |          |          |
| N.NDWDKDIM(+15.99)LIK.L   | Y    | 48.22  | 1405.6912 | 11     | 0.8  | 703.8534 | 2 | 47.57 | 4        | F4:13818 | 17112021_RID_2349_DP4.raw |          |          |
| K.VLNEDEQTREPT.E          | Y    | 47.20  | 1429.6685 | 12     | 0.5  | 715.8419 | 2 | 25.27 | 4        | F4:6180  | 17112021_RID_2349_DP4.raw |          |          |
| Y.QNNDWDKDIMLIK.L         | Y    | 44.19  | 1631.7977 | 13     | 0.5  | 544.9401 | 3 | 50.35 | 4        | F4:14806 | 17112021_RID_2349_DP4.raw |          |          |
| K.KVLNEDEQTRE.P           | N    | 43.42  | 1359.6630 | 11     | 0.2  | 680.8389 | 2 | 18.27 | 4        | F4:3798  | 17112021_RID_2349_DP4.raw |          |          |
| A.GYQNNDWDK.D             | Y    | 42.46  | 1138.4679 | 9      | -0.2 | 570.2411 | 2 | 26.69 | 4        | F4:6675  | 17112021_RID_2349_DP4.raw |          |          |
| K.VLNEDEQTREPTEKIFY.C     | Y    | 42.44  | 1996.9377 | 16     | 0.0  | 999.4762 | 2 | 36.81 | 4        | F4:10173 | 17112021_RID_2349_DP4.raw |          |          |
| N.SDNFQM(+15.99)QFGVHSK.K | N    | 42.19  | 1539.6776 | 13     | 1.2  | 770.8470 | 2 | 32.62 | 4        | F4:8609  | 17112021_RID_2349_DP4.raw |          |          |
| F.QMQFGVHSK.K             | N    | 40.86  | 1060.5125 | 9      | 0.7  | 531.2639 | 2 | 24.46 | 4        | F4:5894  | 17112021_RID_2349_DP4.raw |          |          |
| K.KVLNEDEQTREPTEKIFY.C    | Y    | 40.79  | 2125.0327 | 17     | 0.6  | 709.3519 | 3 | 34.27 | 4        | F4:9275  | 17112021_RID_2349_DP4.raw |          |          |
| K.VTYPDVPH.C              | N    | 39.33  | 926.4498  | 8      | -0.6 | 464.2319 | 2 | 35.54 | 6        | F6:9635  | 17112021_RID_2349_DP6.raw |          |          |
| K.TSTHIAPLSLPSSAPSVGS.V   | Y    | 39.31  | 1807.9315 | 19     | 0.9  | 904.9738 | 2 | 49.11 | 4        | F4:14246 | 17112021_RID_2349_DP4.raw |          |          |

total

TRINITY\_DN1507  
[back to list](#)  
| [Protein Coverage](#) | [Supporting Peptides](#) |  
Protein Coverage:

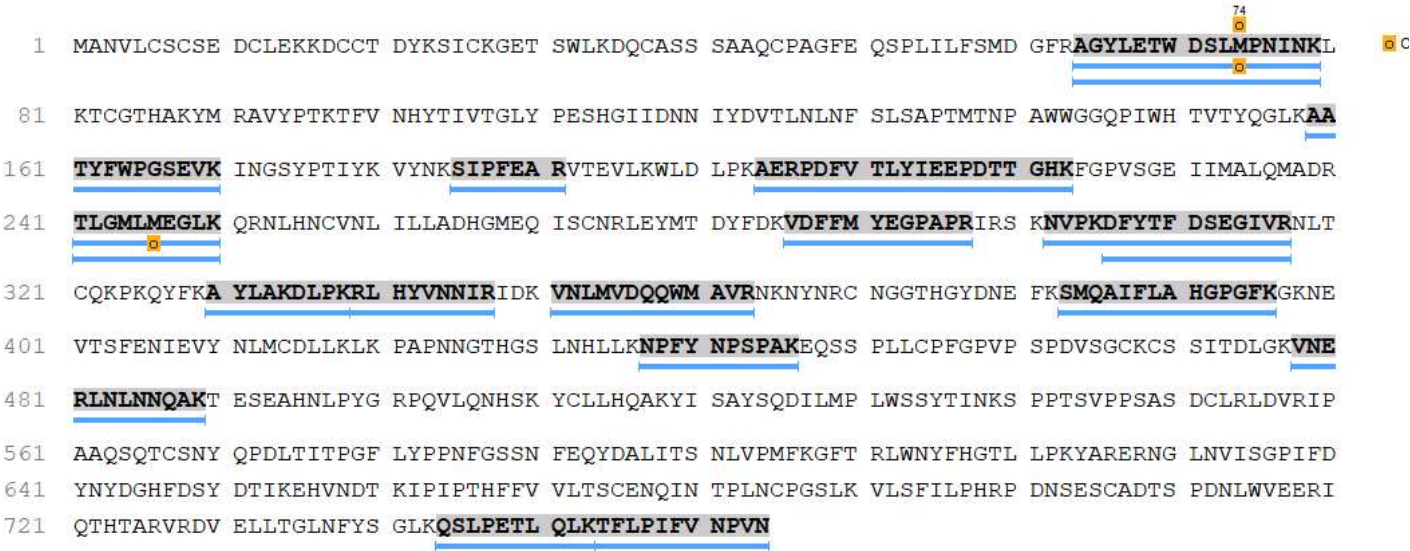

Supporting Peptides:

| Peptide                      | Uniq | -10lgP | Mass      | Length | ppm  | m/z      | z | RT    | Fraction | Scan     | Source File               | Area F1  | Area  |
|------------------------------|------|--------|-----------|--------|------|----------|---|-------|----------|----------|---------------------------|----------|-------|
| K.DFYTFDSEGIVR.N             | Y    | 89.31  | 1447.6619 | 12     | 0.7  | 724.8387 | 2 | 56.67 | 1        | F1:17397 | 12112021_RID_2349_DP1.raw | 1.3223E6 |       |
| K.NPFYNPSPAK.E               | N    | 84.62  | 1133.5505 | 10     | 0.0  | 567.7825 | 2 | 34.93 | 1        | F1:10324 | 12112021_RID_2349_DP1.raw | 1.138E7  | 1.617 |
| K.SMQAIFLAHGPFGK.G           | Y    | 77.40  | 1502.7704 | 14     | 1.0  | 752.3932 | 2 | 50.76 | 1        | F1:15524 | 12112021_RID_2349_DP1.raw | 2.4779E5 |       |
| K.AATYFWPGSEVK.I             | N    | 74.08  | 1354.6558 | 12     | 0.4  | 678.3354 | 2 | 50.11 | 1        | F1:15322 | 12112021_RID_2349_DP1.raw | 1.6628E6 | 1.581 |
| K.TFLPIFVNPVN                | Y    | 72.44  | 1259.6914 | 11     | 0.6  | 630.8533 | 2 | 74.54 | 1        | F1:23258 | 12112021_RID_2349_DP1.raw | 1.257E7  |       |
| R.AGYLETWDSLMPNINK.L         | Y    | 71.20  | 1850.8872 | 16     | 0.6  | 926.4514 | 2 | 65.24 | 1        | F1:20092 | 12112021_RID_2349_DP1.raw | 7.1448E5 | 1.049 |
| R.TLGMLMEGLK.Q               | N    | 65.62  | 1091.5719 | 10     | -0.1 | 546.7932 | 2 | 53.13 | 1        | F1:16226 | 12112021_RID_2349_DP1.raw | 2.9888E5 |       |
| K.VNERLNLNNQAK.T             | Y    | 65.11  | 1411.7532 | 12     | -0.6 | 471.5914 | 3 | 25.48 | 1        | F1:6986  | 12112021_RID_2349_DP1.raw | 2.9466E6 |       |
| K.VNLMVDQQWMAVR.N            | N    | 63.98  | 1588.7854 | 13     | 0.2  | 795.4001 | 2 | 56.99 | 1        | F1:17428 | 12112021_RID_2349_DP1.raw | 1.178E5  |       |
| R.TLGMLM(+15.99)EGLK.Q       | N    | 62.95  | 1107.5668 | 10     | 0.0  | 554.7906 | 2 | 53.06 | 1        | F1:16245 | 12112021_RID_2349_DP1.raw | 1.4377E5 |       |
| K.NVPKDFYTFDSEGIVR.N         | Y    | 60.51  | 1885.9210 | 16     | 0.3  | 629.6478 | 3 | 51.20 | 1        | F1:15596 | 12112021_RID_2349_DP1.raw | 9.4201E5 |       |
| K.QSLPETLQLK.T               | Y    | 58.68  | 1155.6499 | 10     | 0.3  | 578.8324 | 2 | 43.37 | 1        | F1:13055 | 12112021_RID_2349_DP1.raw | 7.7551E6 |       |
| R.AGYLETWDSLM(+15.99)PNINK.L | Y    | 57.35  | 1866.8822 | 16     | 0.6  | 934.4489 | 2 | 65.26 | 1        | F1:20129 | 12112021_RID_2349_DP1.raw | 2.6064E5 |       |
| K.AYLAKDLPK.R                | N    | 54.37  | 1017.5858 | 9      | -0.3 | 509.8000 | 2 | 31.16 | 1        | F1:8942  | 12112021_RID_2349_DP1.raw | 1.0616E6 |       |
| K.VDFFMYEGPAPR.I             | N    | 48.08  | 1427.6543 | 12     | 0.8  | 714.8350 | 2 | 56.53 | 1        | F1:17314 | 12112021_RID_2349_DP1.raw | 2.1345E4 |       |
| K.AERPFDVTLYIEEPD,TTGHK.F    | Y    | 47.01  | 2317.1226 | 20     | 0.9  | 773.3821 | 3 | 51.14 | 1        | F1:15544 | 12112021_RID_2349_DP1.raw | 1.1012E6 |       |
| K.SIPFEAR.V                  | N    | 41.70  | 818.4286  | 7      | -0.3 | 410.2214 | 2 | 34.74 | 1        | F1:10150 | 12112021_RID_2349_DP1.raw | 2.9409E6 |       |
| K.RLHYVNNIR.I                | Y    | 41.43  | 1183.6573 | 9      | 0.5  | 395.5599 | 3 | 35.06 | 1        | F1:10272 | 12112021_RID_2349_DP1.raw | 8.4331E4 |       |

total 1

TRINITY\_DN1507  
[back to list](#)

[Protein Coverage](#) | [Supporting Peptides](#) |  
Protein Coverage:



Supporting Peptides:

| Peptide                      | Uniq | -10lgP | Mass      | Length | ppm  | m/z      | z | RT    | Fraction | Scan     | Source File               | Area F1  | Area  |
|------------------------------|------|--------|-----------|--------|------|----------|---|-------|----------|----------|---------------------------|----------|-------|
| K.DFYTFDSEGIVR.N             | Y    | 89.31  | 1447.6619 | 12     | 0.7  | 724.8387 | 2 | 56.67 | 1        | F1:17397 | 12112021_RID_2349_DP1.raw | 1.3223E6 |       |
| K.NPFYNPSPAK.E               | N    | 84.62  | 1133.5505 | 10     | 0.0  | 567.7825 | 2 | 34.93 | 1        | F1:10324 | 12112021_RID_2349_DP1.raw | 1.138E7  | 1.617 |
| K.SMQAIFLAHGPFGK.G           | Y    | 77.40  | 1502.7704 | 14     | 1.0  | 752.3932 | 2 | 50.76 | 1        | F1:15524 | 12112021_RID_2349_DP1.raw | 2.4779E5 |       |
| K.AATYFWPGSEVK.I             | N    | 74.08  | 1354.6558 | 12     | 0.4  | 678.3354 | 2 | 50.11 | 1        | F1:15322 | 12112021_RID_2349_DP1.raw | 1.6628E6 | 1.581 |
| K.TFLPIFVNPVN                | Y    | 72.44  | 1259.6914 | 11     | 0.6  | 630.8533 | 2 | 74.54 | 1        | F1:23258 | 12112021_RID_2349_DP1.raw | 1.257E7  |       |
| R.AGYLETWDSLMPNINK.L         | Y    | 71.20  | 1850.8872 | 16     | 0.6  | 926.4514 | 2 | 65.24 | 1        | F1:20092 | 12112021_RID_2349_DP1.raw | 7.1448E5 | 1.049 |
| R.TLGMLMEGLK.Q               | N    | 65.62  | 1091.5719 | 10     | -0.1 | 546.7932 | 2 | 53.13 | 1        | F1:16226 | 12112021_RID_2349_DP1.raw | 2.9888E5 |       |
| K.VNERLNLNNQAK.T             | Y    | 65.11  | 1411.7532 | 12     | -0.6 | 471.5914 | 3 | 25.48 | 1        | F1:6986  | 12112021_RID_2349_DP1.raw | 2.9466E6 |       |
| K.VNLMVDQQWMAVR.N            | N    | 63.98  | 1588.7854 | 13     | 0.2  | 795.4001 | 2 | 56.99 | 1        | F1:17428 | 12112021_RID_2349_DP1.raw | 1.178E5  |       |
| R.TLGMLM(+15.99)EGLK.Q       | N    | 62.95  | 1107.5668 | 10     | 0.0  | 554.7906 | 2 | 53.06 | 1        | F1:16245 | 12112021_RID_2349_DP1.raw | 1.4377E5 |       |
| K.NVPKDFYTFDSEGIVR.N         | Y    | 60.51  | 1885.9210 | 16     | 0.3  | 629.6478 | 3 | 51.20 | 1        | F1:15596 | 12112021_RID_2349_DP1.raw | 9.4201E5 |       |
| K.QSLPETLQLK.T               | Y    | 58.68  | 1155.6499 | 10     | 0.3  | 578.8324 | 2 | 43.37 | 1        | F1:13055 | 12112021_RID_2349_DP1.raw | 7.7551E6 |       |
| R.AGYLETWDSLM(+15.99)PNINK.L | Y    | 57.35  | 1866.8822 | 16     | 0.6  | 934.4489 | 2 | 65.26 | 1        | F1:20129 | 12112021_RID_2349_DP1.raw | 2.6064E5 |       |
| K.AYLAKDLPK.R                | N    | 54.37  | 1017.5858 | 9      | -0.3 | 509.8000 | 2 | 31.16 | 1        | F1:8942  | 12112021_RID_2349_DP1.raw | 1.0616E6 |       |
| K.VDFFMYEGPAPR.I             | N    | 48.08  | 1427.6543 | 12     | 0.8  | 714.8350 | 2 | 56.53 | 1        | F1:17314 | 12112021_RID_2349_DP1.raw | 2.1345E4 |       |
| K.AERPDPFVTLYIEEPDTHGHK.F    | Y    | 47.01  | 2317.1226 | 20     | 0.9  | 773.3821 | 3 | 51.14 | 1        | F1:15544 | 12112021_RID_2349_DP1.raw | 1.1012E6 |       |
| K.SIPFEAR.V                  | N    | 41.70  | 818.4286  | 7      | -0.3 | 410.2214 | 2 | 34.74 | 1        | F1:10150 | 12112021_RID_2349_DP1.raw | 2.9409E6 |       |
| K.RLHYVNNIR.I                | Y    | 41.43  | 1183.6573 | 9      | 0.5  | 395.5599 | 3 | 35.06 | 1        | F1:10272 | 12112021_RID_2349_DP1.raw | 8.4331E4 |       |

total 1

TRINITY\_DN1507  
[back to list](#)

[Protein Coverage](#) | [Supporting Peptides](#) |  
Protein Coverage:

1 MASGCSCDDK CTERQACCQD YEDTCVLPTQ SWSCSKLRCS EKRMANVLCS CSEDCLEKKD CCTDYKSICK GETSWLKDQC

81 ASSSAAQCPA GFEQSPLILF SMDGFRAGYL ETWDSLMPNI NKLKTCGTHA KYMRAVYPTK TFDVNYHTIVT GLYPESHGII

161 DNNIYDVTLN LNFSLSAPTM TNPAAWGGQP IWHTVTYQGL KAATYFWPGS EVKINGSYPT IYKVYNKSIP FEARVTEVLK

241 WLDLPK AERP DFVTLYIEEP DTTGHKFGPV SGEIIMALQM ADR TLGMLME GLKQORNHNC VNLILLADHG MEQISCNRLE

321 YMTDYFDKVD FFMYEGPAPR IRSKNVPKDF YTFDSEGIVR NLTCQKPKQY FKAYLAKDLP KRLHYVNNIR IDKVNLMDVQ

401 QWMAVRNKNKY NRCNGGTHGY DNEFKSMQAI FLAHGPGFKG KNEVTSFENI EVYNLMCDLL KLKPAPNNGT HGSLNHLLKN

481 PFYNPSPAKE QSSPLLCFPG PVPSPDVSGC KCSSITDLGK VNERLNLNNQ AKTESEAHNL PYGRPQVLQN HSKYCLLHQA

561 KYISAYSQDI LMPLWSSYTI NKSPTTSVPP SASDCLRLDV RIPAAQSQTC SNYQPDLTIT PGFLYPPNFG SSNFEQYDAL

641 ITSNLVPMFK GFTRLWNYFH GTLLPKYARE RNGLNVISGP IFDYNVDGHF DSYDTIKEHV NDTKIPIPTH FFVVLTSCE

721 QINTPLNCPG SLKVLFSILP HRPDNSESCA DTSPDNLWE ERIQTHTARV RDVELLTGLN FYSGLKQSLP ETLQLKTF

801 IFVNPVN

Supporting Peptides:

| Peptide                      | Uniq | -10lgP | Mass      | Length | ppm  | m/z      | z | RT    | Fraction | Scan     | Source File               | Area F1  | Area  |
|------------------------------|------|--------|-----------|--------|------|----------|---|-------|----------|----------|---------------------------|----------|-------|
| K.DFYTFDSEGIVR.N             | Y    | 89.31  | 1447.6619 | 12     | 0.7  | 724.8387 | 2 | 56.67 | 1        | F1:17397 | 12112021_RID_2349_DP1.raw | 1.3223E6 |       |
| K.NPFYNPSPAK.E               | N    | 84.62  | 1133.5505 | 10     | 0.0  | 567.7825 | 2 | 34.93 | 1        | F1:10324 | 12112021_RID_2349_DP1.raw | 1.138E7  | 1.617 |
| K.SMQAIFLAHGPFGK.G           | Y    | 77.40  | 1502.7704 | 14     | 1.0  | 752.3932 | 2 | 50.76 | 1        | F1:15524 | 12112021_RID_2349_DP1.raw | 2.4779E5 |       |
| K.AATYFWPGSEVK.I             | N    | 74.08  | 1354.6558 | 12     | 0.4  | 678.3354 | 2 | 50.11 | 1        | F1:15322 | 12112021_RID_2349_DP1.raw | 1.6628E6 | 1.581 |
| K.TFLPIFVNPVN                | Y    | 72.44  | 1259.6914 | 11     | 0.6  | 630.8533 | 2 | 74.54 | 1        | F1:23258 | 12112021_RID_2349_DP1.raw | 1.257E7  |       |
| R.AGYLETWDSLMPNINK.L         | Y    | 71.20  | 1850.8872 | 16     | 0.6  | 926.4514 | 2 | 65.24 | 1        | F1:20092 | 12112021_RID_2349_DP1.raw | 7.1448E5 | 1.049 |
| R.TLGMLMEGLK.Q               | N    | 65.62  | 1091.5719 | 10     | -0.1 | 546.7932 | 2 | 53.13 | 1        | F1:16226 | 12112021_RID_2349_DP1.raw | 2.9888E5 |       |
| K.VNERLNLNNQAK.T             | Y    | 65.11  | 1411.7532 | 12     | -0.6 | 471.5914 | 3 | 25.48 | 1        | F1:6986  | 12112021_RID_2349_DP1.raw | 2.9466E6 |       |
| K.VNLMVDQWMAVR.N             | N    | 63.98  | 1588.7854 | 13     | 0.2  | 795.4001 | 2 | 56.99 | 1        | F1:17428 | 12112021_RID_2349_DP1.raw | 1.178E5  |       |
| R.TLGMLM(+15.99)EGLK.Q       | N    | 62.95  | 1107.5668 | 10     | 0.0  | 554.7906 | 2 | 53.06 | 1        | F1:16245 | 12112021_RID_2349_DP1.raw | 1.4377E5 |       |
| K.NVPKDFYTFDSEGIVR.N         | Y    | 60.51  | 1885.9210 | 16     | 0.3  | 629.6478 | 3 | 51.20 | 1        | F1:15596 | 12112021_RID_2349_DP1.raw | 9.4201E5 |       |
| K.QSLPETLQLK.T               | Y    | 58.68  | 1155.6499 | 10     | 0.3  | 578.8324 | 2 | 43.37 | 1        | F1:13055 | 12112021_RID_2349_DP1.raw | 7.7551E6 |       |
| R.AGYLETWDSLM(+15.99)PNINK.L | Y    | 57.35  | 1866.8822 | 16     | 0.6  | 934.4489 | 2 | 65.26 | 1        | F1:20129 | 12112021_RID_2349_DP1.raw | 2.6064E5 |       |
| K.AYLAKDLPK.R                | N    | 54.37  | 1017.5858 | 9      | -0.3 | 509.8000 | 2 | 31.16 | 1        | F1:8942  | 12112021_RID_2349_DP1.raw | 1.0616E6 |       |
| K.VDFFMYEGPAPR.I             | N    | 48.08  | 1427.6543 | 12     | 0.8  | 714.8350 | 2 | 56.53 | 1        | F1:17314 | 12112021_RID_2349_DP1.raw | 2.1345E4 |       |
| K.AERPDPFVTLYIEEPDTTGHK.F    | Y    | 47.01  | 2317.1226 | 20     | 0.9  | 773.3821 | 3 | 51.14 | 1        | F1:15544 | 12112021_RID_2349_DP1.raw | 1.1012E6 |       |
| K.SIPFEAR.V                  | N    | 41.70  | 818.4286  | 7      | -0.3 | 410.2214 | 2 | 34.74 | 1        | F1:10150 | 12112021_RID_2349_DP1.raw | 2.9409E6 |       |
| K.RLHYVNNIR.I                | Y    | 41.43  | 1183.6573 | 9      | 0.5  | 395.5599 | 3 | 35.06 | 1        | F1:10272 | 12112021_RID_2349_DP1.raw | 8.4331E4 |       |

total 1

TRINITY\_DN1507  
[back to list](#)

[Protein Coverage](#) | [Supporting Peptides](#) |  
Protein Coverage:

1 MIQQKVLFI<sup>161</sup>S LVAVALGLGL GLGLKESVEP QVSCRYRCNE TFSKMASGCS CDDKCTERQA CCQDYEDTCV LPTQSWSCSK

81 LRCSEKRMAN VLCSCSEDCL EKKDCCTDYK SICKGETSWL KDQCASSAA QCPAGFEQSP LILFSMDGFR **AGYLETWD<sup>161</sup>SL**

161 **MPNINK**LKTC GTHAKYMR<sup>161</sup>AV YPTKTFVNHY TIVTGLYPES HGIIDNNIYD VTLN<sup>161</sup>LNFSLS APTMTNPAWW GGQPIWHTVT

241 YQGLK**AATYF WPGSEV**KING SYPTIYKVYN **KSIPFEAR**VT EVLKWL<sup>161</sup>DLPK **AERP**DFVTLY **IEEP**DTTGHK FGPVSGEII<sup>161</sup>M

321 ALQMA<sup>161</sup>DR**TLG MLMEGL**KQRN LHNCVNLILL ADHGMEQISC NRLEYMTDYF DK**V**DDFFMYEG **PAPRI**RSKNV **PKDFY**TFDSE

401 **GIVR**NLTCQK PKQYFK**AYLA KDL**PKRLHYV NNIRIDK**VNL MVD**QQWMAVR NKNYNRCNGG THGYDNEFKS **MQAI**FLAHGP

481 **GFK**GKNEVTS FENIEVYNLM CDLLKLPAP NNGTHGSLNH LLK**NPFYNPS** **PAK**EQSSPLL CPF<sup>161</sup>GPVPSD VSGCKCSSIT

561 DLGK**VNERLN LNNQAK**TESE AHNLPYGRPQ VLQNH<sup>161</sup>SKYCL LHQAKYISAY SQDILMPLWS SYTINKSPPT SVPPSASDCL

641 RLDVRI<sup>161</sup>PAAQ SQTC<sup>161</sup>SNYQPD LTITPGFLYP PNF<sup>161</sup>GSSNFEQ YDALITSNLV PMFKGFTRLW NYFHGTLLPK YARERNGLNV

721 ISGPIFDYNY DGHFDSYDTI KEHVNDTKIP IP<sup>161</sup>THFFVVL<sup>161</sup>T SCENQINTPL NCPGSLKVL<sup>161</sup>S FILPHRPDNS ESCADTSPDN

801 LWVEERIQTH TARVRDV<sup>161</sup>ELL TGLNFYSGLK **QSLPETLQ**LK **TFLPIFVN**PV N

Supporting Peptides:

| Peptide                                  | Uniq | -10lgP | Mass      | Length | ppm  | m/z      | z | RT    | Fraction | Scan     | Source File               | Area F1  | Area  |
|------------------------------------------|------|--------|-----------|--------|------|----------|---|-------|----------|----------|---------------------------|----------|-------|
| K.DFYTFDSEGIVR.N                         | Y    | 89.31  | 1447.6619 | 12     | 0.7  | 724.8387 | 2 | 56.67 | 1        | F1:17397 | 12112021_RID_2349_DP1.raw | 1.3223E6 |       |
| K.NPFYNPSPAK.E                           | N    | 84.62  | 1133.5505 | 10     | 0.0  | 567.7825 | 2 | 34.93 | 1        | F1:10324 | 12112021_RID_2349_DP1.raw | 1.138E7  | 1.617 |
| K.SMQAIFLAHGPGFK.G                       | Y    | 77.40  | 1502.7704 | 14     | 1.0  | 752.3932 | 2 | 50.76 | 1        | F1:15524 | 12112021_RID_2349_DP1.raw | 2.4779E5 |       |
| K.AATYFWPGSEVK.I                         | N    | 74.08  | 1354.6558 | 12     | 0.4  | 678.3354 | 2 | 50.11 | 1        | F1:15322 | 12112021_RID_2349_DP1.raw | 1.6628E6 | 1.581 |
| K.TFLPIFVNPVN                            | Y    | 72.44  | 1259.6914 | 11     | 0.6  | 630.8533 | 2 | 74.54 | 1        | F1:23258 | 12112021_RID_2349_DP1.raw | 1.257E7  |       |
| R.AGYLETWDSLMPNINK.L                     | Y    | 71.20  | 1850.8872 | 16     | 0.6  | 926.4514 | 2 | 65.24 | 1        | F1:20092 | 12112021_RID_2349_DP1.raw | 7.1448E5 | 1.049 |
| R.TLGMLMEGLK.Q                           | N    | 65.62  | 1091.5719 | 10     | -0.1 | 546.7932 | 2 | 53.13 | 1        | F1:16226 | 12112021_RID_2349_DP1.raw | 2.9888E5 |       |
| K.VNERLNLNNQAK.T                         | Y    | 65.11  | 1411.7532 | 12     | -0.6 | 471.5914 | 3 | 25.48 | 1        | F1:6986  | 12112021_RID_2349_DP1.raw | 2.9466E6 |       |
| K.VNLMVDQQWMAVR.N                        | N    | 63.98  | 1588.7854 | 13     | 0.2  | 795.4001 | 2 | 56.99 | 1        | F1:17428 | 12112021_RID_2349_DP1.raw | 1.178E5  |       |
| R.TLGMLM(+15.99)EGLK.Q                   | N    | 62.95  | 1107.5668 | 10     | 0.0  | 554.7906 | 2 | 53.06 | 1        | F1:16245 | 12112021_RID_2349_DP1.raw | 1.4377E5 |       |
| K.NVPKDFYTFDSEGIVR.N                     | Y    | 60.51  | 1885.9210 | 16     | 0.3  | 629.6478 | 3 | 51.20 | 1        | F1:15596 | 12112021_RID_2349_DP1.raw | 9.4201E5 |       |
| K.QSLPETLQLK.T                           | Y    | 58.68  | 1155.6499 | 10     | 0.3  | 578.8324 | 2 | 43.37 | 1        | F1:13055 | 12112021_RID_2349_DP1.raw | 7.7551E6 |       |
| R.AGYLETWDSL(+15.99)PNINK.L              | Y    | 57.35  | 1866.8822 | 16     | 0.6  | 934.4489 | 2 | 65.26 | 1        | F1:20129 | 12112021_RID_2349_DP1.raw | 2.6064E5 |       |
| K.AYLA <sup>161</sup> KDLPK.R            | N    | 54.37  | 1017.5858 | 9      | -0.3 | 509.8000 | 2 | 31.16 | 1        | F1:8942  | 12112021_RID_2349_DP1.raw | 1.0616E6 |       |
| K.VDDFFMYEGPAPRI                         | N    | 48.08  | 1427.6543 | 12     | 0.8  | 714.8350 | 2 | 56.53 | 1        | F1:17314 | 12112021_RID_2349_DP1.raw | 2.1345E4 |       |
| K.AERP <sup>161</sup> DFVTLYIEEPDTTGHK.F | Y    | 47.01  | 2317.1226 | 20     | 0.9  | 773.3821 | 3 | 51.14 | 1        | F1:15544 | 12112021_RID_2349_DP1.raw | 1.1012E6 |       |
| K.SIPFEAR.V                              | N    | 41.70  | 818.4286  | 7      | -0.3 | 410.2214 | 2 | 34.74 | 1        | F1:10150 | 12112021_RID_2349_DP1.raw | 2.9409E6 |       |
| K.RLHYVNNIR.I                            | Y    | 41.43  | 1183.6573 | 9      | 0.5  | 395.5599 | 3 | 35.06 | 1        | F1:10272 | 12112021_RID_2349_DP1.raw | 8.4331E4 |       |

total 1

TRINITY\_DN1507  
[back to list](#)

| [Protein Coverage](#) | [Supporting Peptides](#) |  
Protein Coverage:

1 MIQQKVLFI<sup>120</sup>S LVAVALGLGL GLGLKESVEP QAQSWSCSKL RCSEKRMANV LCSCSEDCLE KDCCTDYKS ICKGETSWLK

81 DQCASSSAAQ CPAGFEQSPL ILFSMDGFRA GYLETWDSLM PNINKLKTG THAKYMRAYV PTKTFVNHYT IVTGLYPESH

161 GIIDNNIYDV TLNLFNLSA PTMTNPAWWG GQPIWHTVTY QGLKAATYFW PGSEVKINGS YPTIYKVYNK SIPFEARVTE

241 VLKWL<sup>120</sup>DLPKA ERPDFVTLYI EEPDTTGHKF G<sup>120</sup>PVSGEIIMA LQMA<sup>120</sup>DR TLGM LMEGLKQ<sup>120</sup>RNL HNCVNLILLA DHGMEQISCN

321 RLEYMTDYFD KVDFFMYEGP APRI<sup>120</sup>RSKNVP KDFYTFDSEG IVRNLTCQKP KQYFKAYLAK DLPKRLHYVN NIRIDKVNLM

401 VDQQWMAVRN KNYNRCNGGT HGYDNEFKSM QAIFLAHGP<sup>120</sup>G FK<sup>120</sup>GKNEVTSF ENIEVYNLMC DLLKLKPAPN NGTHGSLNHL

481 LKNPFYNPSP AKEQSSPLLC PFGVPVSPDV SGCKCSSITD LGKVNERLNL NNQAKTESEA HNL<sup>120</sup>PYGRPQV LQNHSKYCLL

561 HQAKYISAYS QDILMPLWSS YTINKSPPTS VPPSASDCLR LDVRIPAAQS QTCSNYQPD<sup>120</sup>L TITPGFLYPP NFGSSNFEQY

641 DALITSNLVP MFKGFTRLWN YFHGTLLPKY ARERNGLNVI SGPIFDYNYD GHFDSYDTIK EHVNDTKIPI PTHFFVVLTS

721 CENQINTPLN CPGSLKVLSE ILPHRPD<sup>120</sup>NSE SCADTSPDNL WVEERIQTHT ARVRDVELLT GLNFYSGLKQ SLPETLQLKT

801 FLPIFVNPVN

Supporting Peptides:

| Peptide                                  | Uniq | -10lgP | Mass      | Length | ppm  | m/z      | z | RT    | Fraction | Scan     | Source File               | Area F1  | Area  |
|------------------------------------------|------|--------|-----------|--------|------|----------|---|-------|----------|----------|---------------------------|----------|-------|
| K.DFYTFDSEGIVR.N                         | Y    | 89.31  | 1447.6619 | 12     | 0.7  | 724.8387 | 2 | 56.67 | 1        | F1:17397 | 12112021_RID_2349_DP1.raw | 1.3223E6 |       |
| K.NPFYNPSPAK.E                           | N    | 84.62  | 1133.5505 | 10     | 0.0  | 567.7825 | 2 | 34.93 | 1        | F1:10324 | 12112021_RID_2349_DP1.raw | 1.138E7  | 1.617 |
| K.SMQAIFLAHGPFGK.G                       | Y    | 77.40  | 1502.7704 | 14     | 1.0  | 752.3932 | 2 | 50.76 | 1        | F1:15524 | 12112021_RID_2349_DP1.raw | 2.4779E5 |       |
| K.AATYFWPGSEVK.I                         | N    | 74.08  | 1354.6558 | 12     | 0.4  | 678.3354 | 2 | 50.11 | 1        | F1:15322 | 12112021_RID_2349_DP1.raw | 1.6628E6 | 1.581 |
| K.TFLPIFVNPVN                            | Y    | 72.44  | 1259.6914 | 11     | 0.6  | 630.8533 | 2 | 74.54 | 1        | F1:23258 | 12112021_RID_2349_DP1.raw | 1.257E7  |       |
| R.AGYLETWDSLMPNINK.L                     | Y    | 71.20  | 1850.8872 | 16     | 0.6  | 926.4514 | 2 | 65.24 | 1        | F1:20092 | 12112021_RID_2349_DP1.raw | 7.1448E5 | 1.049 |
| R.TLGMLMEGLK.Q                           | N    | 65.62  | 1091.5719 | 10     | -0.1 | 546.7932 | 2 | 53.13 | 1        | F1:16226 | 12112021_RID_2349_DP1.raw | 2.9888E5 |       |
| K.VNERLNLNNQAK.T                         | Y    | 65.11  | 1411.7532 | 12     | -0.6 | 471.5914 | 3 | 25.48 | 1        | F1:6986  | 12112021_RID_2349_DP1.raw | 2.9466E6 |       |
| K.VNLMVDQQWMAVR.N                        | N    | 63.98  | 1588.7854 | 13     | 0.2  | 795.4001 | 2 | 56.99 | 1        | F1:17428 | 12112021_RID_2349_DP1.raw | 1.178E5  |       |
| R.TLGMLM(+15.99)EGLK.Q                   | N    | 62.95  | 1107.5668 | 10     | 0.0  | 554.7906 | 2 | 53.06 | 1        | F1:16245 | 12112021_RID_2349_DP1.raw | 1.4377E5 |       |
| K.NVPKDFYTFDSEGIVR.N                     | Y    | 60.51  | 1885.9210 | 16     | 0.3  | 629.6478 | 3 | 51.20 | 1        | F1:15596 | 12112021_RID_2349_DP1.raw | 9.4201E5 |       |
| K.QLPETLQLK.T                            | Y    | 58.68  | 1155.6499 | 10     | 0.3  | 578.8324 | 2 | 43.37 | 1        | F1:13055 | 12112021_RID_2349_DP1.raw | 7.7551E6 |       |
| R.AGYLETWDSLM(+15.99)PNINK.L             | Y    | 57.35  | 1866.8822 | 16     | 0.6  | 934.4489 | 2 | 65.26 | 1        | F1:20129 | 12112021_RID_2349_DP1.raw | 2.6064E5 |       |
| K.AYLAKDLPK.R                            | N    | 54.37  | 1017.5858 | 9      | -0.3 | 509.8000 | 2 | 31.16 | 1        | F1:8942  | 12112021_RID_2349_DP1.raw | 1.0616E6 |       |
| K.VDFFMYEGPAPR.I                         | N    | 48.08  | 1427.6543 | 12     | 0.8  | 714.8350 | 2 | 56.53 | 1        | F1:17314 | 12112021_RID_2349_DP1.raw | 2.1345E4 |       |
| K.AERP <sup>120</sup> DFVTLYIEEPDTTGHK.F | Y    | 47.01  | 2317.1226 | 20     | 0.9  | 773.3821 | 3 | 51.14 | 1        | F1:15544 | 12112021_RID_2349_DP1.raw | 1.1012E6 |       |
| K.SIPFEAR.V                              | N    | 41.70  | 818.4286  | 7      | -0.3 | 410.2214 | 2 | 34.74 | 1        | F1:10150 | 12112021_RID_2349_DP1.raw | 2.9409E6 |       |
| K.RLHYVNNIR.I                            | Y    | 41.43  | 1183.6573 | 9      | 0.5  | 395.5599 | 3 | 35.06 | 1        | F1:10272 | 12112021_RID_2349_DP1.raw | 8.4331E4 |       |

total 1

TRINITY\_DN1507  
[back to list](#)

[Protein Coverage](#) | [Supporting Peptides](#) |  
Protein Coverage:

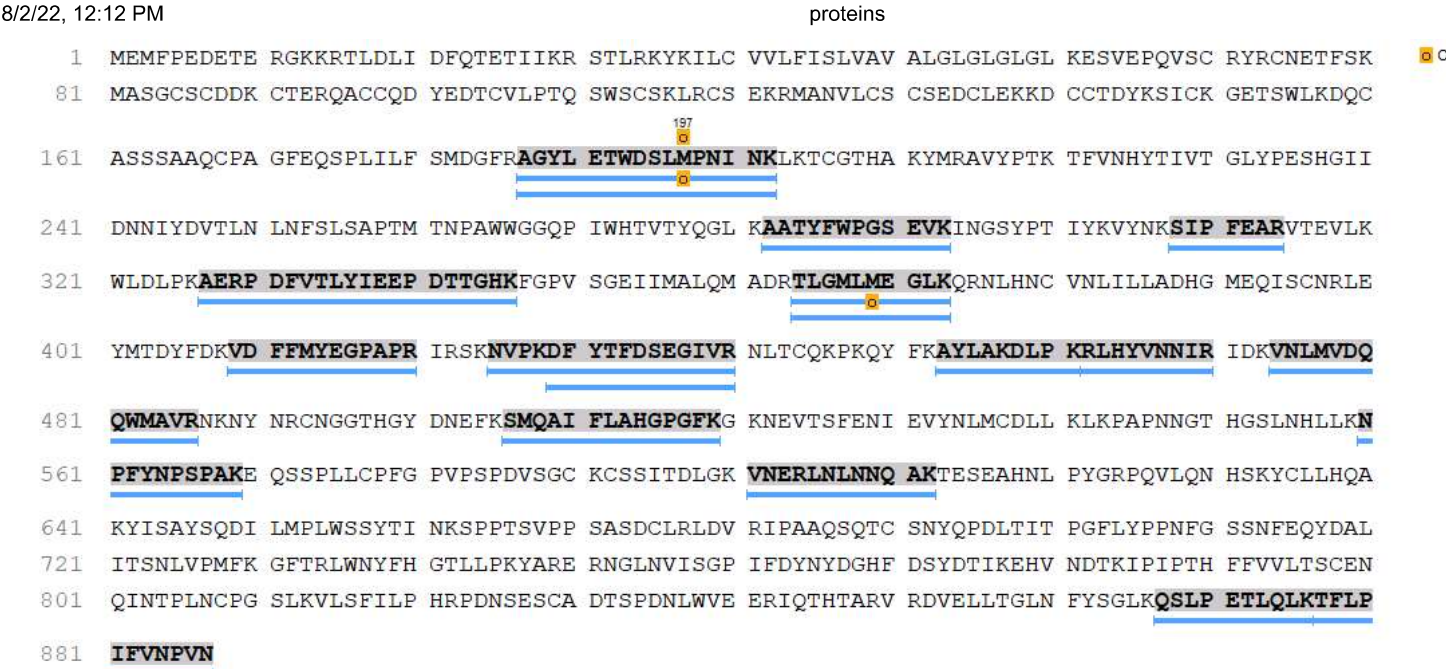

Supporting Peptides:

| Peptide                     | Uniq | -10lgP | Mass      | Length | ppm  | m/z      | z | RT    | Fraction | Scan     | Source File               | Area F1  | Area  |
|-----------------------------|------|--------|-----------|--------|------|----------|---|-------|----------|----------|---------------------------|----------|-------|
| K.DFYTFDSEGIVR.N            | Y    | 89.31  | 1447.6619 | 12     | 0.7  | 724.8387 | 2 | 56.67 | 1        | F1:17397 | 12112021_RID_2349_DP1.raw | 1.3223E6 |       |
| K.NPFYNPSPAK.E              | N    | 84.62  | 1133.5505 | 10     | 0.0  | 567.7825 | 2 | 34.93 | 1        | F1:10324 | 12112021_RID_2349_DP1.raw | 1.138E7  | 1.617 |
| K.SMQAIFLAHGPFGK.G          | Y    | 77.40  | 1502.7704 | 14     | 1.0  | 752.3932 | 2 | 50.76 | 1        | F1:15524 | 12112021_RID_2349_DP1.raw | 2.4779E5 |       |
| K.AATYFWPGSEVK.I            | N    | 74.08  | 1354.6558 | 12     | 0.4  | 678.3354 | 2 | 50.11 | 1        | F1:15322 | 12112021_RID_2349_DP1.raw | 1.6628E6 | 1.581 |
| K.TFLPIFVNPVN               | Y    | 72.44  | 1259.6914 | 11     | 0.6  | 630.8533 | 2 | 74.54 | 1        | F1:23258 | 12112021_RID_2349_DP1.raw | 1.257E7  |       |
| R.AGYLETWDSLMPNINK.L        | Y    | 71.20  | 1850.8872 | 16     | 0.6  | 926.4514 | 2 | 65.24 | 1        | F1:20092 | 12112021_RID_2349_DP1.raw | 7.1448E5 | 1.049 |
| R.TLGMLMEGLK.Q              | N    | 65.62  | 1091.5719 | 10     | -0.1 | 546.7932 | 2 | 53.13 | 1        | F1:16226 | 12112021_RID_2349_DP1.raw | 2.9888E5 |       |
| K.VNERLNLNNQAK.T            | Y    | 65.11  | 1411.7532 | 12     | -0.6 | 471.5914 | 3 | 25.48 | 1        | F1:6986  | 12112021_RID_2349_DP1.raw | 2.9466E6 |       |
| K.VNLMVDQQWMAVR.N           | N    | 63.98  | 1588.7854 | 13     | 0.2  | 795.4001 | 2 | 56.99 | 1        | F1:17428 | 12112021_RID_2349_DP1.raw | 1.178E5  |       |
| R.TLGMLM(+15.99)EGLK.Q      | N    | 62.95  | 1107.5668 | 10     | 0.0  | 554.7906 | 2 | 53.06 | 1        | F1:16245 | 12112021_RID_2349_DP1.raw | 1.4377E5 |       |
| K.NVPKDFYTFDSEGIVR.N        | Y    | 60.51  | 1885.9210 | 16     | 0.3  | 629.6478 | 3 | 51.20 | 1        | F1:15596 | 12112021_RID_2349_DP1.raw | 9.4201E5 |       |
| K.QLSPETLQLK.T              | Y    | 58.68  | 1155.6499 | 10     | 0.3  | 578.8324 | 2 | 43.37 | 1        | F1:13055 | 12112021_RID_2349_DP1.raw | 7.7551E6 |       |
| R.AGYLETWDSL(+15.99)PNINK.L | Y    | 57.35  | 1866.8822 | 16     | 0.6  | 934.4489 | 2 | 65.26 | 1        | F1:20129 | 12112021_RID_2349_DP1.raw | 2.6064E5 |       |
| K.AYLAKDLPK.R               | N    | 54.37  | 1017.5858 | 9      | -0.3 | 509.8000 | 2 | 31.16 | 1        | F1:8942  | 12112021_RID_2349_DP1.raw | 1.0616E6 |       |
| K.VDFFMYEGPAPR.I            | N    | 48.08  | 1427.6543 | 12     | 0.8  | 714.8350 | 2 | 56.53 | 1        | F1:17314 | 12112021_RID_2349_DP1.raw | 2.1345E4 |       |
| K.AERPDPVTLYIEEPDTTGHK.F    | Y    | 47.01  | 2317.1226 | 20     | 0.9  | 773.3821 | 3 | 51.14 | 1        | F1:15544 | 12112021_RID_2349_DP1.raw | 1.1012E6 |       |
| K.SIPFEAR.V                 | N    | 41.70  | 818.4286  | 7      | -0.3 | 410.2214 | 2 | 34.74 | 1        | F1:10150 | 12112021_RID_2349_DP1.raw | 2.9409E6 |       |
| K.RLHYVNNIR.I               | Y    | 41.43  | 1183.6573 | 9      | 0.5  | 395.5599 | 3 | 35.06 | 1        | F1:10272 | 12112021_RID_2349_DP1.raw | 8.4331E4 |       |

total 1

TRINITY\_DN30  
[back to list](#)

[Protein Coverage](#) | [Supporting Peptides](#) |  
Protein Coverage:

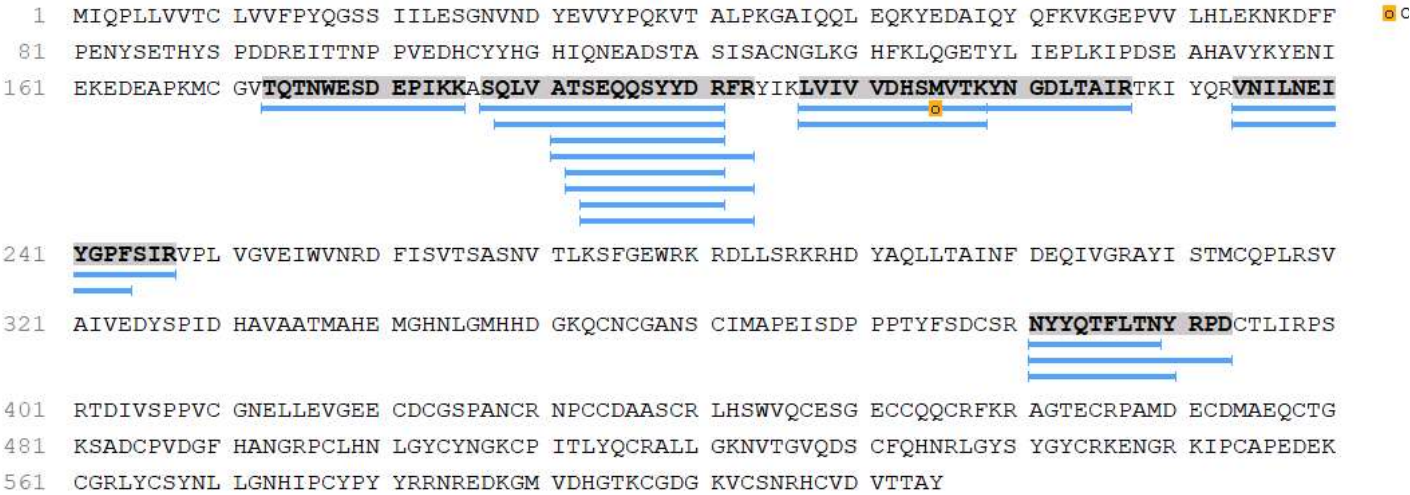

Supporting Peptides:

| Peptide                  | Uniq | -10lgP | Mass      | Length | ppm  | m/z      | z | RT    | Fraction | Scan     | Source File               | Area F1  | Area F2  | A        |
|--------------------------|------|--------|-----------|--------|------|----------|---|-------|----------|----------|---------------------------|----------|----------|----------|
| K.LVIVVDHSMVTK.Y         | N    | 86.31  | 1339.7533 | 12     | 0.8  | 670.8845 | 2 | 40.72 | 2        | F2:11182 | 12112021_RID_2349_DP2.raw | 6.7627E5 | 6.7627E5 | 6.7627E5 |
| A.SQLVATSEQQSYDR.F       | N    | 85.45  | 1773.8169 | 15     | 0.1  | 887.9158 | 2 | 35.26 | 3        | F3:9651  | 17112021_RID_2349_DP3.raw |          |          | 3.2544E6 |
| R.VNILNEIYGPFSSIR.V      | Y    | 80.46  | 1633.8827 | 14     | 0.4  | 817.9489 | 2 | 68.10 | 3        | F3:20508 | 17112021_RID_2349_DP3.raw | 2.1784E5 | 1.6365E6 | 7.2544E6 |
| K.LVIVVDHSM(+15.99)VTK.Y | N    | 80.36  | 1355.7483 | 12     | 0.3  | 678.8816 | 2 | 40.62 | 2        | F2:11272 | 12112021_RID_2349_DP2.raw | 3.9309E5 | 1.6365E6 | 1.6365E6 |
| K.YNGDLTAIR.T            | N    | 72.64  | 1021.5192 | 9      | -0.1 | 511.7668 | 2 | 35.19 | 1        | F1:10334 | 12112021_RID_2349_DP1.raw | 2.7287E6 | 6.3775E6 | 1.6365E6 |
| V.ATSEQQSYDR.F           | N    | 70.49  | 1346.5739 | 11     | 0.3  | 674.2944 | 2 | 23.13 | 2        | F2:5110  | 12112021_RID_2349_DP2.raw | 1.2012E5 | 4.4545E5 | 7.2544E6 |
| R.NYYQTFLTNYPD.C         | N    | 66.53  | 1693.7736 | 13     | 0.4  | 847.8944 | 2 | 54.36 | 2        | F2:15683 | 12112021_RID_2349_DP2.raw | 2.3745E5 | 9.7382E5 | 7.2544E6 |
| S.QLVATSEQQSYDR.F        | N    | 63.01  | 1686.7849 | 14     | 1.1  | 844.4006 | 2 | 47.86 | 5        | F5:13912 | 17112021_RID_2349_DP5.raw | 1.5966E5 | 2.1784E5 | 2.1784E5 |
| T.SEQQSYDR.F             | N    | 62.38  | 1174.4890 | 9      | 0.7  | 588.2522 | 2 | 21.94 | 2        | F2:4785  | 12112021_RID_2349_DP2.raw | 3.2418E4 | 2.9845E5 | 2.9845E5 |
| A.TSEQQSYDR.F            | N    | 58.61  | 1275.5367 | 10     | 0.4  | 638.7759 | 2 | 22.62 | 5        | F5:5328  | 17112021_RID_2349_DP5.raw | 1.2834E5 | 4.8542E5 | 8.1254E6 |
| R.VNILNEIYGPF.S          | Y    | 48.96  | 1277.6655 | 11     | 0.3  | 639.8402 | 2 | 74.71 | 3        | F3:22527 | 17112021_RID_2349_DP3.raw |          |          | 2.1784E5 |
| A.TSEQQSYDRFR.Y          | N    | 45.69  | 1578.7063 | 12     | -0.5 | 527.2424 | 3 | 33.88 | 1        | F1:9791  | 12112021_RID_2349_DP1.raw | 5.1666E6 |          | 1.6365E6 |
| R.NYYQTFLTN.Y            | N    | 45.63  | 1325.5928 | 10     | 0.5  | 663.8040 | 2 | 61.33 | 4        | F4:18230 | 17112021_RID_2349_DP4.raw |          |          | 7.2544E6 |
| V.TQTNWESDEPIKK.A        | N    | 44.98  | 1574.7576 | 13     | 0.5  | 788.3865 | 2 | 30.75 | 1        | F1:8710  | 12112021_RID_2349_DP1.raw | 3.3503E5 |          | 7.2544E6 |
| T.SEQQSYDRFR.Y           | N    | 42.54  | 1477.6586 | 11     | 0.6  | 739.8370 | 2 | 32.22 | 3        | F3:8513  | 17112021_RID_2349_DP3.raw | 1.2544E6 | 3.2544E6 | 3.2544E6 |
| V.ATSEQQSYDRFR.Y         | N    | 41.91  | 1649.7434 | 13     | 0.5  | 550.9220 | 3 | 32.84 | 3        | F3:8815  | 17112021_RID_2349_DP3.raw | 1.9978E6 |          | 5.1666E6 |
| R.NYYQTFLTN.Y            | N    | 40.03  | 1162.5295 | 9      | 0.5  | 582.2723 | 2 | 54.02 | 4        | F4:15903 | 17112021_RID_2349_DP4.raw |          |          | 7.2544E6 |

total

TRINITY\_DN30  
[back to list](#)

[Protein Coverage](#) | [Supporting Peptides](#) |  
Protein Coverage:

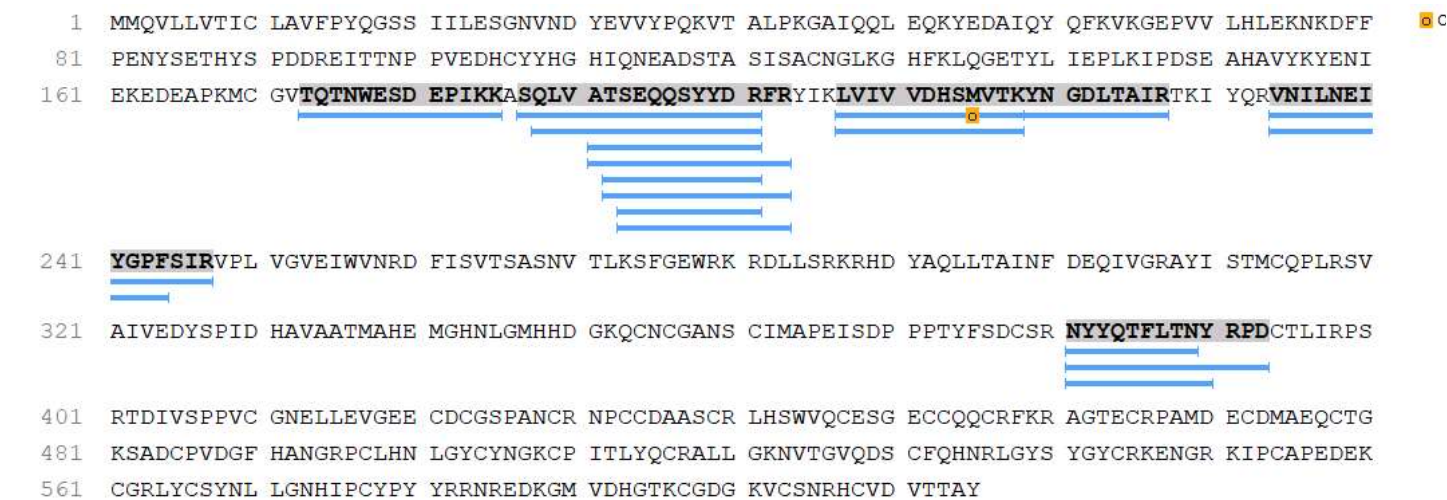

Supporting Peptides:

| Peptide                  | Uniq | -10lgP | Mass      | Length | ppm  | m/z      | z | RT    | Fraction | Scan     | Source File               | Area F1  | Area F2  | A        |
|--------------------------|------|--------|-----------|--------|------|----------|---|-------|----------|----------|---------------------------|----------|----------|----------|
| K.LVIVVDHSMVTK.Y         | N    | 86.31  | 1339.7533 | 12     | 0.8  | 670.8845 | 2 | 40.72 | 2        | F2:11182 | 12112021_RID_2349_DP2.raw | 6.7627E5 | 6.7627E5 | 6.7627E5 |
| A.SQLVATSEQQSYDR.F       | N    | 85.45  | 1773.8169 | 15     | 0.1  | 887.9158 | 2 | 35.26 | 3        | F3:9651  | 17112021_RID_2349_DP3.raw |          |          | 3.9309E5 |
| R.VNILNEIYGPFSSIR.V      | Y    | 80.46  | 1633.8827 | 14     | 0.4  | 817.9489 | 2 | 68.10 | 3        | F3:20508 | 17112021_RID_2349_DP3.raw | 2.1784E5 | 1.6365E6 | 7.1784E5 |
| K.LVIVVDHSM(+15.99)VTK.Y | N    | 80.36  | 1355.7483 | 12     | 0.3  | 678.8816 | 2 | 40.62 | 2        | F2:11272 | 12112021_RID_2349_DP2.raw | 3.9309E5 | 1.6365E6 | 7.1784E5 |
| K.YNGDLTAIR.T            | N    | 72.64  | 1021.5192 | 9      | -0.1 | 511.7668 | 2 | 35.19 | 1        | F1:10334 | 12112021_RID_2349_DP1.raw | 2.7287E6 | 6.3775E6 | 1.6365E6 |
| V.ATSEQQSYDR.F           | N    | 70.49  | 1346.5739 | 11     | 0.3  | 674.2944 | 2 | 23.13 | 2        | F2:5110  | 12112021_RID_2349_DP2.raw | 1.2012E5 | 4.4545E5 | 7.1784E5 |
| R.NYYQTFLTNYPD.C         | N    | 66.53  | 1693.7736 | 13     | 0.4  | 847.8944 | 2 | 54.36 | 2        | F2:15683 | 12112021_RID_2349_DP2.raw | 2.3745E5 | 9.7382E5 | 7.1784E5 |
| S.QLVATSEQQSYDR.F        | N    | 63.01  | 1686.7849 | 14     | 1.1  | 844.4006 | 2 | 47.86 | 5        | F5:13912 | 17112021_RID_2349_DP5.raw | 1.5966E5 | 2.1784E5 | 7.1784E5 |
| T.SEQQSYDR.F             | N    | 62.38  | 1174.4890 | 9      | 0.7  | 588.2522 | 2 | 21.94 | 2        | F2:4785  | 12112021_RID_2349_DP2.raw | 3.2418E4 | 2.9845E5 | 2.9845E5 |
| A.TSEQQSYDR.F            | N    | 58.61  | 1275.5367 | 10     | 0.4  | 638.7759 | 2 | 22.62 | 5        | F5:5328  | 17112021_RID_2349_DP5.raw | 1.2834E5 | 4.8542E5 | 8.1636E5 |
| R.VNILNEIYGPF.S          | Y    | 48.96  | 1277.6655 | 11     | 0.3  | 639.8402 | 2 | 74.71 | 3        | F3:22527 | 17112021_RID_2349_DP3.raw |          |          | 2.9845E5 |
| A.TSEQQSYDRFR.Y          | N    | 45.69  | 1578.7063 | 12     | -0.5 | 527.2424 | 3 | 33.88 | 1        | F1:9791  | 12112021_RID_2349_DP1.raw | 5.1666E6 |          | 1.6365E6 |
| R.NYYQTFLTN.Y            | N    | 45.63  | 1325.5928 | 10     | 0.5  | 663.8040 | 2 | 61.33 | 4        | F4:18230 | 17112021_RID_2349_DP4.raw |          |          | 2.9845E5 |
| V.TQTNWESDEPIKK.A        | N    | 44.98  | 1574.7576 | 13     | 0.5  | 788.3865 | 2 | 30.75 | 1        | F1:8710  | 12112021_RID_2349_DP1.raw | 3.3503E5 |          | 7.1784E5 |
| T.SEQQSYDRFR.Y           | N    | 42.54  | 1477.6586 | 11     | 0.6  | 739.8370 | 2 | 32.22 | 3        | F3:8513  | 17112021_RID_2349_DP3.raw | 1.2544E6 | 3.9309E5 | 3.9309E5 |
| V.ATSEQQSYDRFR.Y         | N    | 41.91  | 1649.7434 | 13     | 0.5  | 550.9220 | 3 | 32.84 | 3        | F3:8815  | 17112021_RID_2349_DP3.raw | 1.9978E6 |          | 5.1666E6 |
| R.NYYQTFLTN.Y            | N    | 40.03  | 1162.5295 | 9      | 0.5  | 582.2723 | 2 | 54.02 | 4        | F4:15903 | 17112021_RID_2349_DP4.raw |          |          | 2.9845E5 |

BAN82155.1  
[back to list](#)

[Protein Coverage](#) | [Supporting Peptides](#) |  
Protein Coverage:

total

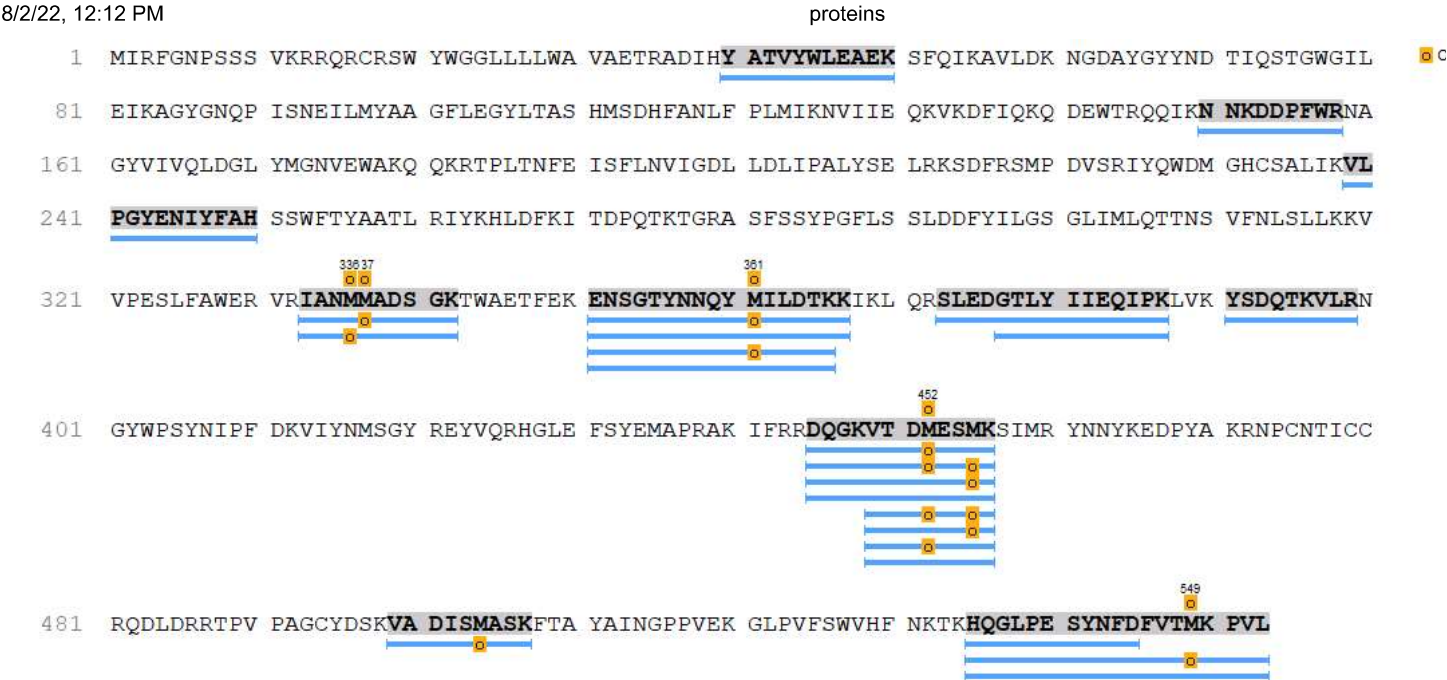

Supporting Peptides:

| Peptide                          | Uniq | -10lgP | Mass      | Length | ppm  | m/z       | z | RT    | Fraction | Scan     | Source File               | Area F1  | A  |
|----------------------------------|------|--------|-----------|--------|------|-----------|---|-------|----------|----------|---------------------------|----------|----|
| R.SLEDGTLYIIEQIPK.L              | N    | 90.40  | 1717.9138 | 15     | 0.5  | 859.9646  | 2 | 67.04 | 2        | F2:19818 | 12112021_RID_2349_DP2.raw | 1.408E6  | 2. |
| K.ENSGTYNNQYMILDTK.K             | N    | 89.12  | 1889.8466 | 16     | 0.8  | 945.9313  | 2 | 45.52 | 2        | F2:12882 | 12112021_RID_2349_DP2.raw |          | 1. |
| R.IANMM(+15.99)ADSGK.T           | N    | 76.74  | 1052.4630 | 10     | -0.3 | 527.2386  | 2 | 24.17 | 2        | F2:6829  | 12112021_RID_2349_DP2.raw | 9.0092E4 | 1. |
| R.IANM(+15.99)MADSGK.T           | N    | 75.38  | 1052.4630 | 10     | -0.3 | 527.2386  | 2 | 24.17 | 2        | F2:6725  | 12112021_RID_2349_DP2.raw |          | 1. |
| R.DQGKVTDMESMK.S                 | N    | 72.75  | 1367.6061 | 12     | 0.5  | 684.8107  | 2 | 27.78 | 2        | F2:6747  | 12112021_RID_2349_DP2.raw |          | 2. |
| H.YATVYWLEAEK.S                  | N    | 72.57  | 1371.6710 | 11     | 0.7  | 686.8433  | 2 | 51.85 | 5        | F5:15257 | 17112021_RID_2349_DP5.raw |          |    |
| K.HQGLPESYNFDFTMKPVL             | N    | 71.29  | 2237.0828 | 19     | 0.8  | 746.7021  | 3 | 59.87 | 2        | F2:17492 | 12112021_RID_2349_DP2.raw |          | 1. |
| K.HQGLPESYNFDFTMKPVL             | N    | 70.10  | 2221.0876 | 19     | 0.3  | 1111.5514 | 2 | 65.61 | 2        | F2:19349 | 12112021_RID_2349_DP2.raw |          | 1. |
| K.ENSGTYNNQYM(+15.99)ILDTK.K     | N    | 68.81  | 1905.8414 | 16     | 0.6  | 953.9286  | 2 | 41.00 | 2        | F2:11307 | 12112021_RID_2349_DP2.raw |          | 9. |
| R.DQGKVTDMESM(+15.99)K.S         | N    | 66.01  | 1383.6010 | 12     | 0.7  | 692.8082  | 2 | 27.71 | 2        | F2:6798  | 12112021_RID_2349_DP2.raw |          | 1. |
| K.YSDQTKVLR.N                    | N    | 60.88  | 1108.5876 | 9      | -0.4 | 555.3009  | 2 | 23.23 | 1        | F1:6160  | 12112021_RID_2349_DP1.raw | 4.0413E5 |    |
| R.DQGKVTDM(+15.99)ESM(+15.99)K.S | N    | 60.55  | 1399.5959 | 12     | -0.3 | 700.8051  | 2 | 27.86 | 2        | F2:6821  | 12112021_RID_2349_DP2.raw |          | 7. |
| R.DQGKVTDM(+15.99)ESMK.S         | N    | 55.19  | 1383.6010 | 12     | 0.0  | 692.8077  | 2 | 19.49 | 2        | F2:3974  | 12112021_RID_2349_DP2.raw |          | 2. |
| K.ENSGTYNNQYMILDTKK.I            | N    | 48.36  | 2017.9415 | 17     | 0.5  | 673.6548  | 3 | 39.15 | 2        | F2:10720 | 12112021_RID_2349_DP2.raw |          | 2. |
| D.GTLYIIEQIPK.L                  | N    | 47.53  | 1273.7281 | 11     | 0.8  | 637.8719  | 2 | 53.61 | 4        | F4:15815 | 17112021_RID_2349_DP4.raw |          |    |
| K.ENSGTYNNQYM(+15.99)ILDTKK.I    | N    | 47.15  | 2033.9364 | 17     | 0.0  | 678.9861  | 3 | 39.23 | 2        | F2:10730 | 12112021_RID_2349_DP2.raw |          | 1. |
| K.VLPGYENIYFAH.S                 | N    | 46.58  | 1421.6979 | 12     | 0.6  | 711.8566  | 2 | 53.52 | 2        | F2:15534 | 12112021_RID_2349_DP2.raw |          | 1. |
| K.VTDM(+15.99)ESMK.S             | N    | 45.53  | 955.3990  | 8      | -0.3 | 478.7067  | 2 | 24.77 | 2        | F2:5754  | 12112021_RID_2349_DP2.raw |          | 1. |
| K.HQGLPESYNFD.F                  | N    | 44.27  | 1305.5625 | 11     | -0.5 | 653.7882  | 2 | 42.77 | 2        | F2:11932 | 12112021_RID_2349_DP2.raw |          | 1. |
| K.VADISM(+15.99)ASK.F            | Y    | 43.92  | 936.4586  | 9      | -0.6 | 469.2363  | 2 | 29.56 | 2        | F2:7390  | 12112021_RID_2349_DP2.raw |          | 3. |
| K.VTDMESM(+15.99)K.S             | N    | 43.61  | 955.3990  | 8      | -0.3 | 478.7067  | 2 | 24.77 | 2        | F2:5660  | 12112021_RID_2349_DP2.raw |          | 1. |
| K.VTDM(+15.99)ESM(+15.99)K.S     | N    | 42.57  | 971.3940  | 8      | -0.2 | 486.7042  | 2 | 24.80 | 2        | F2:5663  | 12112021_RID_2349_DP2.raw |          | 8. |
| K.NNKDDPFWR.N                    | N    | 41.45  | 1190.5469 | 9      | 0.5  | 596.2810  | 2 | 35.13 | 5        | F5:9629  | 17112021_RID_2349_DP5.raw |          |    |
| K.VTDMESMK.S                     | N    | 39.74  | 939.4042  | 8      | 0.0  | 470.7094  | 2 | 24.77 | 2        | F2:5674  | 12112021_RID_2349_DP2.raw |          | 7. |

TRINITY\_DN266  
[back to list](#)

[Protein Coverage](#) | [Supporting Peptides](#) |  
Protein Coverage:

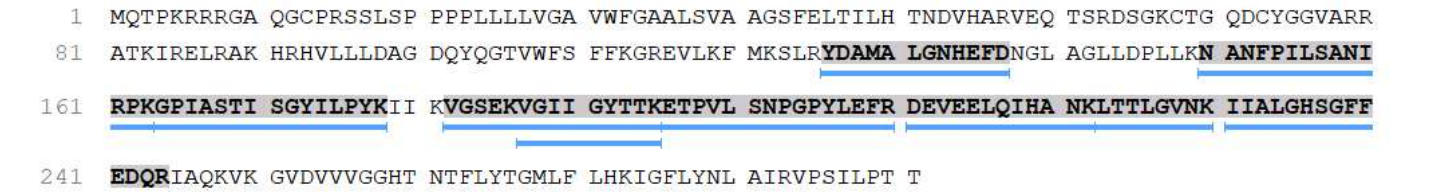

Supporting Peptides:

| Peptide             | Uniq | -10lgP | Mass      | Length | ppm  | m/z      | z | RT    | Fraction | Scan     | Source File               | Area F1  | Area F2  | Area I  |
|---------------------|------|--------|-----------|--------|------|----------|---|-------|----------|----------|---------------------------|----------|----------|---------|
| K.IIALGHSGFFEDQR.I  | N    | 93.42  | 1588.7997 | 14     | 0.8  | 795.4078 | 2 | 47.13 | 2        | F2:13392 | 12112021_RID_2349_DP2.raw | 1.2282E6 | 4.8241E6 | 2.973E  |
| K.NANFPILSANIRPK.G  | N    | 87.65  | 1553.8678 | 14     | 0.6  | 777.9417 | 2 | 47.24 | 1        | F1:14300 | 12112021_RID_2349_DP1.raw | 2.5082E7 | 3.0757E6 |         |
| K.GPIASTISGYILPYK.I | Y    | 85.78  | 1578.8657 | 15     | 0.7  | 790.4407 | 2 | 58.67 | 2        | F2:17142 | 12112021_RID_2349_DP2.raw | 4.5074E6 | 4.1083E6 | 2.5052E |
| K.VGSEKVGIIGYTTK.E  | N    | 74.20  | 1450.8031 | 14     | 0.9  | 726.4095 | 2 | 36.48 | 1        | F1:10777 | 12112021_RID_2349_DP1.raw | 2.8559E6 |          |         |
| R.DEVEELQIHANK.L    | N    | 70.10  | 1423.6943 | 12     | 0.6  | 712.8549 | 2 | 34.19 | 4        | F4:9279  | 17112021_RID_2349_DP4.raw |          | 2.6545E4 |         |
| K.ETPVLSNPGPYLEFR.D | N    | 63.99  | 1717.8674 | 15     | 0.3  | 859.9412 | 2 | 55.85 | 4        | F4:16529 | 17112021_RID_2349_DP4.raw |          |          |         |
| K.VGIIGYTTK.E       | N    | 60.94  | 950.5436  | 9      | -0.2 | 476.2790 | 2 | 37.93 | 1        | F1:11149 | 12112021_RID_2349_DP1.raw | 9.0552E6 | 3.6938E6 | 2.4626E |
| R.YDAMALGNHEFD.N    | N    | 53.56  | 1381.5608 | 12     | 1.0  | 691.7883 | 2 | 46.21 | 7        | F7:13460 | 17112021_RID_2349_DP7.raw |          |          |         |
| K.LTTLGVNK.I        | N    | 48.37  | 844.5018  | 8      | -0.2 | 423.2581 | 2 | 28.18 | 2        | F2:6923  | 12112021_RID_2349_DP2.raw | 1.9323E6 | 3.4738E6 | 2.4241E |

total 9 peptides

TRINITY\_DN240  
[back to list](#)

[Protein Coverage](#) | [Supporting Peptides](#) |  
Protein Coverage:

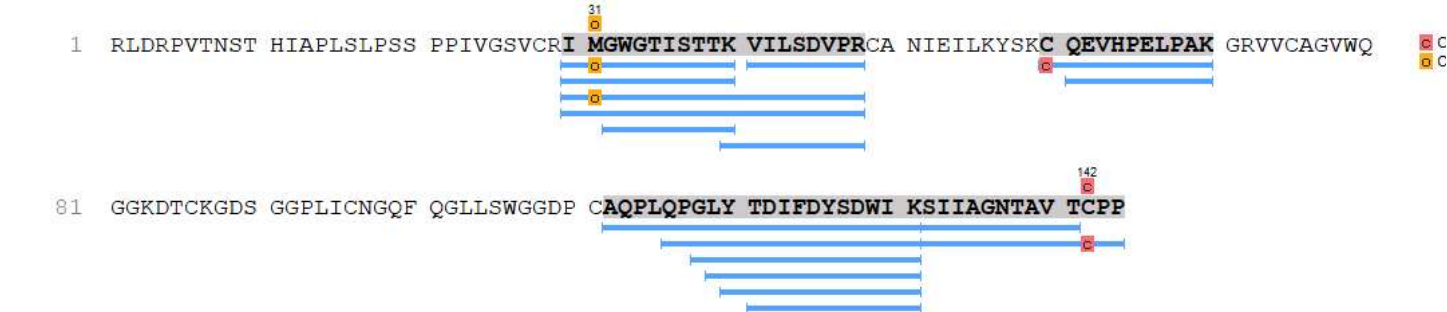

Supporting Peptides:

| Peptide                         | Uniq | -10lgP | Mass      | Length | ppm | m/z      | z | RT    | Fraction | Scan     | Source File               | Area F1  | Area F2 | Area I |
|---------------------------------|------|--------|-----------|--------|-----|----------|---|-------|----------|----------|---------------------------|----------|---------|--------|
| R.IMGWGTISTTKVILSDVPR.C         | Y    | 96.96  | 2073.1292 | 19     | 0.2 | 692.0505 | 3 | 59.98 | 3        | F3:17898 | 17112021_RID_2349_DP3.raw |          |         |        |
| R.IMGWGTISTTK.V                 | N    | 74.23  | 1193.6115 | 11     | 0.6 | 597.8134 | 2 | 46.31 | 2        | F2:13130 | 12112021_RID_2349_DP2.raw | 1.0272E6 | 8       |        |
| G.LYTDIFDYSDWIK.S               | N    | 70.95  | 1677.7926 | 13     | 1.1 | 839.9045 | 2 | 72.40 | 3        | F3:21807 | 17112021_RID_2349_DP3.raw |          |         |        |
| P.GLYTDIFDYSDWIK.S              | N    | 70.77  | 1734.8141 | 14     | 0.1 | 868.4144 | 2 | 74.37 | 3        | F3:22479 | 17112021_RID_2349_DP3.raw |          |         |        |
| L.YTDIFDYSDWIK.S                | N    | 69.44  | 1564.7085 | 12     | 0.3 | 783.3618 | 2 | 68.09 | 3        | F3:20399 | 17112021_RID_2349_DP3.raw |          |         |        |
| Y.TDIFDYSDWIK.S                 | N    | 66.08  | 1401.6453 | 11     | 0.8 | 701.8304 | 2 | 66.55 | 4        | F4:19959 | 17112021_RID_2349_DP4.raw |          |         |        |
| R.IM(+15.99)GWGTISTTKVILSDVPR.C | Y    | 65.54  | 2089.1240 | 19     | 0.7 | 697.3824 | 3 | 56.07 | 3        | F3:16589 | 17112021_RID_2349_DP3.raw |          |         |        |
| R.IM(+15.99)GWGTISTTK.V         | N    | 65.43  | 1209.6063 | 11     | 0.2 | 605.8105 | 2 | 41.63 | 3        | F3:12035 | 17112021_RID_2349_DP3.raw |          |         | 4      |
| K.SIAGNTAVTC(+57.02)PP          | N    | 58.39  | 1299.6493 | 13     | 0.5 | 650.8323 | 2 | 45.43 | 3        | F3:13053 | 17112021_RID_2349_DP3.raw |          |         |        |
| K.VILSDVPR.C                    | Y    | 53.60  | 897.5283  | 8      | 0.4 | 449.7716 | 2 | 36.96 | 1        | F1:10936 | 12112021_RID_2349_DP1.raw | 2.2296E6 | 1       |        |
| L.QPGLYTDIFDYSDWIK.S            | N    | 51.31  | 1959.9254 | 16     | 0.7 | 980.9707 | 2 | 73.83 | 3        | F3:22207 | 17112021_RID_2349_DP3.raw |          |         |        |

| Peptide                  | Uniq | -10lgP | Mass      | Length | ppm  | m/z       | z | RT    | Fraction | Scan     | Source File               | Area F1 | F2 |
|--------------------------|------|--------|-----------|--------|------|-----------|---|-------|----------|----------|---------------------------|---------|----|
| K.SILAGNTAVT.C           | N    | 48.53  | 945.5131  | 10     | 0.0  | 473.7639  | 2 | 39.62 | 3        | F3:11085 | 17112021_RID_2349_DP3.raw |         |    |
| K.C(+57.02)QEVHPELPAK.G  | Y    | 46.74  | 1306.6339 | 11     | 0.6  | 654.3246  | 2 | 27.17 | 3        | F3:6836  | 17112021_RID_2349_DP3.raw |         |    |
| M.GWGTISTTK.V            | N    | 46.73  | 949.4869  | 9      | -0.6 | 475.7504  | 2 | 32.18 | 3        | F3:8600  | 17112021_RID_2349_DP3.raw |         |    |
| T.KVILSDVPR.C            | Y    | 42.92  | 1025.6233 | 9      | 0.3  | 513.8191  | 2 | 30.86 | 3        | F3:8089  | 17112021_RID_2349_DP3.raw |         |    |
| C.AQPLQPGLYTDIFDYSDWIK.S | N    | 41.95  | 2369.1580 | 20     | 0.7  | 1185.5870 | 2 | 75.98 | 3        | F3:23000 | 17112021_RID_2349_DP3.raw |         |    |
| C.QEVHPELPAK.G           | Y    | 38.96  | 1146.6033 | 10     | 0.2  | 574.3090  | 2 | 26.03 | 3        | F3:6524  | 17112021_RID_2349_DP3.raw |         |    |

TRINITY\_DN59  
[back to list](#)

[Protein Coverage](#) | [Supporting Peptides](#) |  
Protein Coverage:

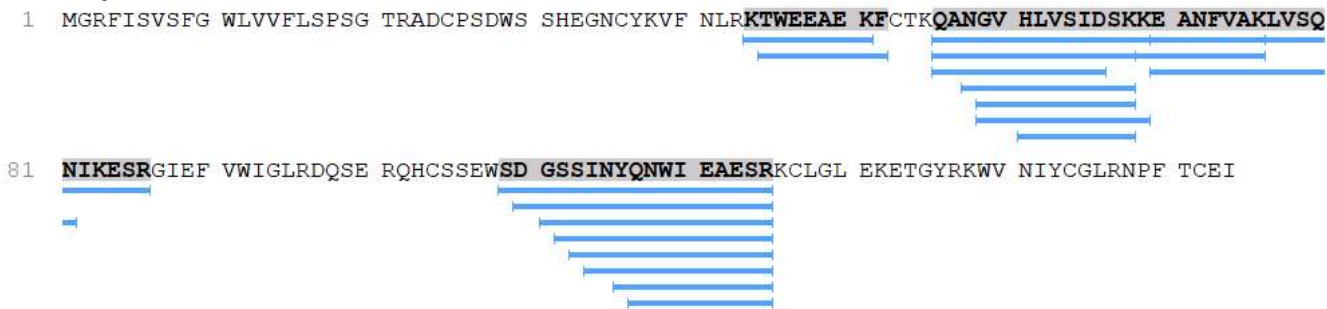

Supporting Peptides:

| Peptide               | Uniq | -10lgP | Mass      | Length | ppm  | m/z      | z | RT    | Fraction | Scan     | Source File               | Area F1  | Area F2 | Area F3 | Area F4 |
|-----------------------|------|--------|-----------|--------|------|----------|---|-------|----------|----------|---------------------------|----------|---------|---------|---------|
| K.QANGVHLVSIDSK.K     | Y    | 81.82  | 1366.7205 | 13     | 0.6  | 456.5811 | 3 | 32.64 | 5        | F5:8755  | 17112021_RID_2349_DP5.raw |          |         |         |         |
| K.QANGVHLVSIDSKK.E    | Y    | 77.07  | 1494.8154 | 14     | 0.1  | 499.2791 | 3 | 28.38 | 5        | F5:7341  | 17112021_RID_2349_DP5.raw |          |         |         |         |
| D.GSSINYQNWIEAESR.K   | Y    | 62.77  | 1752.8066 | 15     | 0.2  | 877.4108 | 2 | 50.91 | 6        | F6:14917 | 17112021_RID_2349_DP6.raw |          |         |         |         |
| S.SINYQNWIEAESR.K     | Y    | 61.57  | 1608.7532 | 13     | 0.1  | 805.3839 | 2 | 51.12 | 6        | F6:14982 | 17112021_RID_2349_DP6.raw |          |         |         |         |
| K.LVSQNIKESR.G        | Y    | 59.45  | 1172.6514 | 10     | 0.9  | 587.3335 | 2 | 20.11 | 1        | F1:5091  | 12112021_RID_2349_DP1.raw | 2.9622E6 |         |         |         |
| N.GVHLVSIDSK.K        | Y    | 56.37  | 1053.5818 | 10     | -0.5 | 527.7979 | 2 | 31.63 | 6        | F6:8277  | 17112021_RID_2349_DP6.raw |          |         |         |         |
| N.YQNWIEAESR.K        | Y    | 55.48  | 1294.5942 | 10     | 0.8  | 648.3049 | 2 | 40.44 | 6        | F6:11179 | 17112021_RID_2349_DP6.raw |          |         |         |         |
| W.SDGSSINYQNWIEAESR.K | Y    | 51.52  | 1954.8657 | 17     | 0.3  | 978.4404 | 2 | 52.50 | 6        | F6:15474 | 17112021_RID_2349_DP6.raw |          |         |         |         |
| G.SSINYQNWIEAESR.K    | Y    | 51.20  | 1695.7853 | 14     | 0.8  | 848.9006 | 2 | 50.80 | 6        | F6:14944 | 17112021_RID_2349_DP6.raw |          |         |         |         |
| Y.QNWIEAESR.K         | Y    | 48.46  | 1131.5309 | 9      | -0.5 | 566.7725 | 2 | 35.70 | 6        | F6:9679  | 17112021_RID_2349_DP6.raw |          |         |         |         |
| K.TWEEAEK.F           | N    | 47.94  | 1038.4658 | 8      | 0.3  | 520.2404 | 2 | 39.87 | 6        | F6:11136 | 17112021_RID_2349_DP6.raw |          |         |         |         |
| N.GVHLVSIDSKK.E       | Y    | 47.32  | 1181.6768 | 11     | -0.8 | 394.8992 | 3 | 27.85 | 6        | F6:6922  | 17112021_RID_2349_DP6.raw |          |         |         |         |
| A.NGVHLVSIDSK.K       | Y    | 47.22  | 1167.6248 | 11     | -0.5 | 584.8193 | 2 | 32.17 | 6        | F6:8523  | 17112021_RID_2349_DP6.raw |          |         |         |         |
| K.EANFVAKLVSQN.I      | Y    | 45.69  | 1318.6881 | 12     | 0.1  | 660.3514 | 2 | 48.74 | 6        | F6:14195 | 17112021_RID_2349_DP6.raw |          |         |         |         |
| R.KTWEEAEK.F          | N    | 45.16  | 1019.4923 | 8      | 0.3  | 510.7536 | 2 | 17.57 | 6        | F6:3741  | 17112021_RID_2349_DP6.raw |          |         |         |         |
| K.QANGVHLVSID.S       | Y    | 43.90  | 1151.5935 | 11     | 0.4  | 576.8043 | 2 | 40.57 | 6        | F6:11384 | 17112021_RID_2349_DP6.raw |          |         |         |         |
| K.KEANFVAK.L          | Y    | 42.38  | 905.4970  | 8      | -0.4 | 453.7556 | 2 | 16.96 | 6        | F6:3318  | 17112021_RID_2349_DP6.raw |          |         |         |         |
| S.DGSSINYQNWIEAESR.K  | Y    | 42.17  | 1867.8336 | 16     | 0.4  | 934.9245 | 2 | 54.93 | 6        | F6:16268 | 17112021_RID_2349_DP6.raw |          |         |         |         |
| K.EANFVAK.L           | Y    | 41.77  | 777.4021  | 7      | 0.2  | 389.7084 | 2 | 22.39 | 6        | F6:5158  | 17112021_RID_2349_DP6.raw |          |         |         |         |
| V.HLVSIDSK.K          | N    | 41.41  | 897.4919  | 8      | -0.6 | 449.7530 | 2 | 23.13 | 6        | F6:5416  | 17112021_RID_2349_DP6.raw |          |         |         |         |
| S.INYQNWIEAESR.K      | Y    | 39.32  | 1521.7212 | 12     | 0.5  | 761.8683 | 2 | 49.89 | 6        | F6:14631 | 17112021_RID_2349_DP6.raw |          |         |         |         |

total 21 peptide

TRINITY\_DN59  
[back to list](#)

| [Protein Coverage](#) | [Supporting Peptides](#) |  
Protein Coverage:

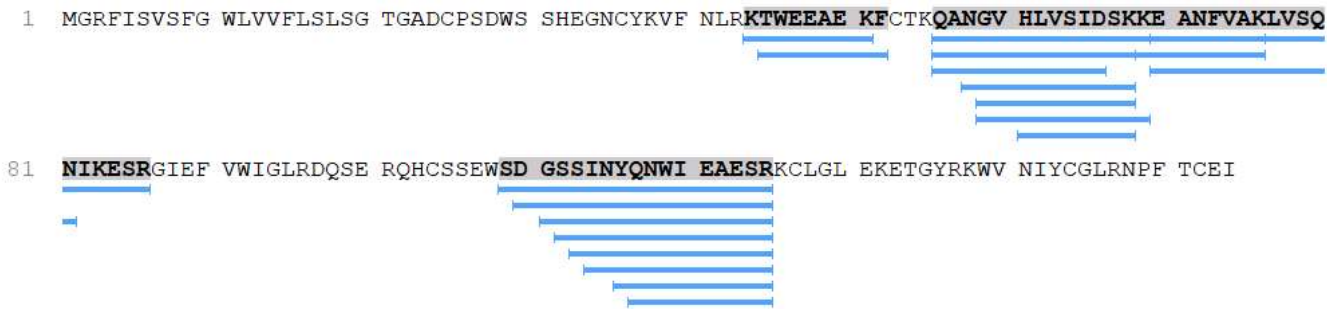

Supporting Peptides:

| Peptide               | Uniq | -10lgP | Mass      | Length | ppm  | m/z      | z | RT    | Fraction | Scan     | Source File               | Area F1  | Area F2 | Area F3 | A<br>F1 |
|-----------------------|------|--------|-----------|--------|------|----------|---|-------|----------|----------|---------------------------|----------|---------|---------|---------|
| K.QANGVHLVSIDSK.K     | Y    | 81.82  | 1366.7205 | 13     | 0.6  | 456.5811 | 3 | 32.64 | 5        | F5:8755  | 17112021_RID_2349_DP5.raw |          |         |         |         |
| K.QANGVHLVSIDSKK.E    | Y    | 77.07  | 1494.8154 | 14     | 0.1  | 499.2791 | 3 | 28.38 | 5        | F5:7341  | 17112021_RID_2349_DP5.raw |          |         |         |         |
| D.GSSINYQNWIEAESR.K   | Y    | 62.77  | 1752.8066 | 15     | 0.2  | 877.4108 | 2 | 50.91 | 6        | F6:14917 | 17112021_RID_2349_DP6.raw |          |         |         |         |
| S.SINYQNWIEAESR.K     | Y    | 61.57  | 1608.7532 | 13     | 0.1  | 805.3839 | 2 | 51.12 | 6        | F6:14982 | 17112021_RID_2349_DP6.raw |          |         |         |         |
| K.LVSQNIKESR.G        | Y    | 59.45  | 1172.6514 | 10     | 0.9  | 587.3335 | 2 | 20.11 | 1        | F1:5091  | 12112021_RID_2349_DP1.raw | 2.9622E6 |         |         |         |
| N.GVHLVSIDSK.K        | Y    | 56.37  | 1053.5818 | 10     | -0.5 | 527.7979 | 2 | 31.63 | 6        | F6:8277  | 17112021_RID_2349_DP6.raw |          |         |         |         |
| N.YQNWIEAESR.K        | Y    | 55.48  | 1294.5942 | 10     | 0.8  | 648.3049 | 2 | 40.44 | 6        | F6:11179 | 17112021_RID_2349_DP6.raw |          |         |         |         |
| W.SDGSSINYQNWIEAESR.K | Y    | 51.52  | 1954.8657 | 17     | 0.3  | 978.4404 | 2 | 52.50 | 6        | F6:15474 | 17112021_RID_2349_DP6.raw |          |         |         |         |
| G.SSINYQNWIEAESR.K    | Y    | 51.20  | 1695.7853 | 14     | 0.8  | 848.9006 | 2 | 50.80 | 6        | F6:14944 | 17112021_RID_2349_DP6.raw |          |         |         |         |
| Y.QNWIEAESR.K         | Y    | 48.46  | 1131.5309 | 9      | -0.5 | 566.7725 | 2 | 35.70 | 6        | F6:9679  | 17112021_RID_2349_DP6.raw |          |         |         |         |
| K.TWEEAEKF.C          | N    | 47.94  | 1038.4658 | 8      | 0.3  | 520.2404 | 2 | 39.87 | 6        | F6:11136 | 17112021_RID_2349_DP6.raw |          |         |         |         |
| N.GVHLVSIDSKK.E       | Y    | 47.32  | 1181.6768 | 11     | -0.8 | 394.8992 | 3 | 27.85 | 6        | F6:6922  | 17112021_RID_2349_DP6.raw |          |         |         |         |
| A.NGVHLVSIDSK.K       | Y    | 47.22  | 1167.6248 | 11     | -0.5 | 584.8193 | 2 | 32.17 | 6        | F6:8523  | 17112021_RID_2349_DP6.raw |          |         |         |         |
| K.EANFVAKLVSQN.I      | Y    | 45.69  | 1318.6881 | 12     | 0.1  | 660.3514 | 2 | 48.74 | 6        | F6:14195 | 17112021_RID_2349_DP6.raw |          |         |         |         |
| R.KTWEEAEKF.F         | N    | 45.16  | 1019.4923 | 8      | 0.3  | 510.7536 | 2 | 17.57 | 6        | F6:3741  | 17112021_RID_2349_DP6.raw |          |         |         |         |
| K.QANGVHLVSID.S       | Y    | 43.90  | 1151.5935 | 11     | 0.4  | 576.8043 | 2 | 40.57 | 6        | F6:11384 | 17112021_RID_2349_DP6.raw |          |         |         |         |
| K.KEANFVAK.L          | Y    | 42.38  | 905.4970  | 8      | -0.4 | 453.7556 | 2 | 16.96 | 6        | F6:3318  | 17112021_RID_2349_DP6.raw |          |         |         |         |
| S.DGSSINYQNWIEAESR.K  | Y    | 42.17  | 1867.8336 | 16     | 0.4  | 934.9245 | 2 | 54.93 | 6        | F6:16268 | 17112021_RID_2349_DP6.raw |          |         |         |         |
| K.EANFVAK.L           | Y    | 41.77  | 777.4021  | 7      | 0.2  | 389.7084 | 2 | 22.39 | 6        | F6:5158  | 17112021_RID_2349_DP6.raw |          |         |         |         |
| V.HLVSIDSK.K          | N    | 41.41  | 897.4919  | 8      | -0.6 | 449.7530 | 2 | 23.13 | 6        | F6:5416  | 17112021_RID_2349_DP6.raw |          |         |         |         |
| S.INYQNWIEAESR.K      | Y    | 39.32  | 1521.7212 | 12     | 0.5  | 761.8683 | 2 | 49.89 | 6        | F6:14631 | 17112021_RID_2349_DP6.raw |          |         |         |         |

total 21 peptide

TRINITY\_DN59  
[back to list](#)

| [Protein Coverage](#) | [Supporting Peptides](#) |  
Protein Coverage:

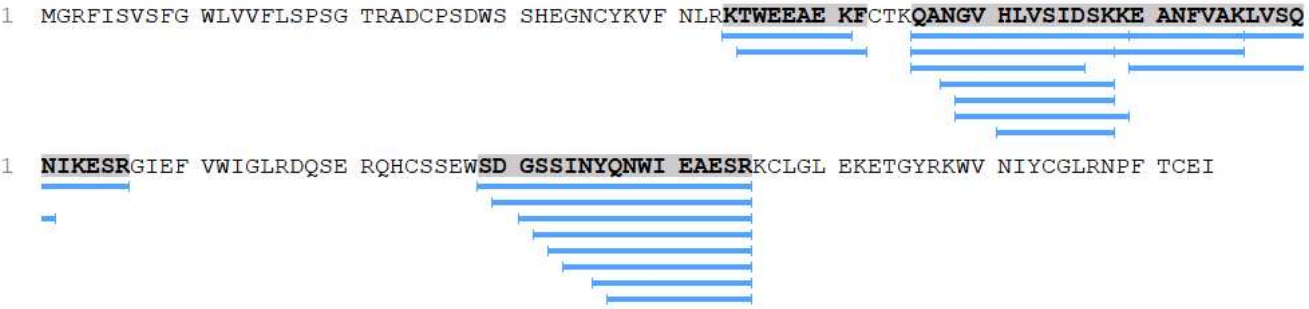

Supporting Peptides:

| Peptide               | Uniq | -10lgP | Mass      | Length | ppm  | m/z      | z | RT    | Fraction | Scan     | Source File               | Area F1  | Area F2 | Area F3 | A |
|-----------------------|------|--------|-----------|--------|------|----------|---|-------|----------|----------|---------------------------|----------|---------|---------|---|
| K.QANGVHLVSIDSK.K     | Y    | 81.82  | 1366.7205 | 13     | 0.6  | 456.5811 | 3 | 32.64 | 5        | F5:8755  | 17112021_RID_2349_DP5.raw |          |         |         |   |
| K.QANGVHLVSIDSKK.E    | Y    | 77.07  | 1494.8154 | 14     | 0.1  | 499.2791 | 3 | 28.38 | 5        | F5:7341  | 17112021_RID_2349_DP5.raw |          |         |         |   |
| D.GSSINYQNWIEAESR.K   | Y    | 62.77  | 1752.8066 | 15     | 0.2  | 877.4108 | 2 | 50.91 | 6        | F6:14917 | 17112021_RID_2349_DP6.raw |          |         |         |   |
| S.SINYQNWIEAESR.K     | Y    | 61.57  | 1608.7532 | 13     | 0.1  | 805.3839 | 2 | 51.12 | 6        | F6:14982 | 17112021_RID_2349_DP6.raw |          |         |         |   |
| K.LVSQNIKESR.G        | Y    | 59.45  | 1172.6514 | 10     | 0.9  | 587.3335 | 2 | 20.11 | 1        | F1:5091  | 12112021_RID_2349_DP1.raw | 2.9622E6 |         |         |   |
| N.GVHLVSIDSK.K        | Y    | 56.37  | 1053.5818 | 10     | -0.5 | 527.7979 | 2 | 31.63 | 6        | F6:8277  | 17112021_RID_2349_DP6.raw |          |         |         |   |
| N.YQNWIEAESR.K        | Y    | 55.48  | 1294.5942 | 10     | 0.8  | 648.3049 | 2 | 40.44 | 6        | F6:11179 | 17112021_RID_2349_DP6.raw |          |         |         |   |
| W.SDGSSINYQNWIEAESR.K | Y    | 51.52  | 1954.8657 | 17     | 0.3  | 978.4404 | 2 | 52.50 | 6        | F6:15474 | 17112021_RID_2349_DP6.raw |          |         |         |   |
| G.SSINYQNWIEAESR.K    | Y    | 51.20  | 1695.7853 | 14     | 0.8  | 848.9006 | 2 | 50.80 | 6        | F6:14944 | 17112021_RID_2349_DP6.raw |          |         |         |   |
| Y.QNWIEAESR.K         | Y    | 48.46  | 1131.5309 | 9      | -0.5 | 566.7725 | 2 | 35.70 | 6        | F6:9679  | 17112021_RID_2349_DP6.raw |          |         |         |   |
| K.TWEEAEKF.C          | N    | 47.94  | 1038.4658 | 8      | 0.3  | 520.2404 | 2 | 39.87 | 6        | F6:11136 | 17112021_RID_2349_DP6.raw |          |         |         |   |
| N.GVHLVSIDSKK.E       | Y    | 47.32  | 1181.6768 | 11     | -0.8 | 394.8992 | 3 | 27.85 | 6        | F6:6922  | 17112021_RID_2349_DP6.raw |          |         |         |   |
| A.NGVHLVSIDSK.K       | Y    | 47.22  | 1167.6248 | 11     | -0.5 | 584.8193 | 2 | 32.17 | 6        | F6:8523  | 17112021_RID_2349_DP6.raw |          |         |         |   |
| K.EANFVAKLVSQN.I      | Y    | 45.69  | 1318.6881 | 12     | 0.1  | 660.3514 | 2 | 48.74 | 6        | F6:14195 | 17112021_RID_2349_DP6.raw |          |         |         |   |
| R.KTWEEAEKF.F         | N    | 45.16  | 1019.4923 | 8      | 0.3  | 510.7536 | 2 | 17.57 | 6        | F6:3741  | 17112021_RID_2349_DP6.raw |          |         |         |   |
| K.QANGVHLVSID.S       | Y    | 43.90  | 1151.5935 | 11     | 0.4  | 576.8043 | 2 | 40.57 | 6        | F6:11384 | 17112021_RID_2349_DP6.raw |          |         |         |   |
| K.KEANFVAK.L          | Y    | 42.38  | 905.4970  | 8      | -0.4 | 453.7556 | 2 | 16.96 | 6        | F6:3318  | 17112021_RID_2349_DP6.raw |          |         |         |   |
| S.DGSSINYQNWIEAESR.K  | Y    | 42.17  | 1867.8336 | 16     | 0.4  | 934.9245 | 2 | 54.93 | 6        | F6:16268 | 17112021_RID_2349_DP6.raw |          |         |         |   |
| K.EANFVAK.L           | Y    | 41.77  | 777.4021  | 7      | 0.2  | 389.7084 | 2 | 22.39 | 6        | F6:5158  | 17112021_RID_2349_DP6.raw |          |         |         |   |
| V.HLVSIDSK.K          | N    | 41.41  | 897.4919  | 8      | -0.6 | 449.7530 | 2 | 23.13 | 6        | F6:5416  | 17112021_RID_2349_DP6.raw |          |         |         |   |
| S.INYQNWIEAESR.K      | Y    | 39.32  | 1521.7212 | 12     | 0.5  | 761.8683 | 2 | 49.89 | 6        | F6:14631 | 17112021_RID_2349_DP6.raw |          |         |         |   |

total 21 peptide

TRINITY\_DN1385  
[back to list](#)

[Protein Coverage](#) | [Supporting Peptides](#) |  
Protein Coverage:

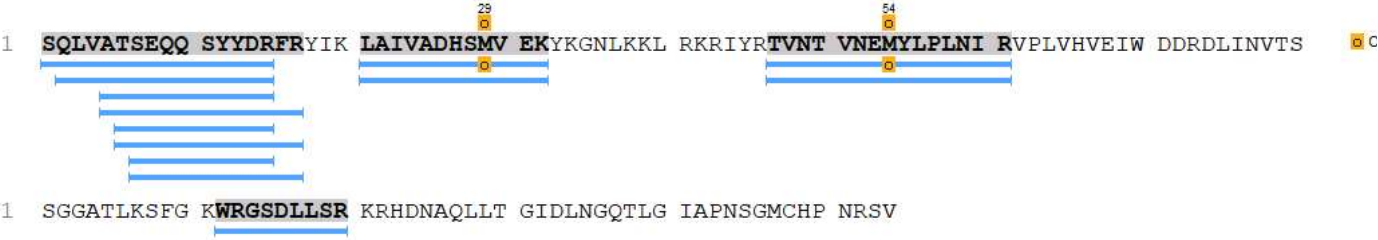

Supporting Peptides:

| Peptide          | Uniq | -10lgP | Mass      | Length | ppm | m/z      | z | RT    | Fraction | Scan    | Source File               | Area F1  | Area F  |
|------------------|------|--------|-----------|--------|-----|----------|---|-------|----------|---------|---------------------------|----------|---------|
| K.LAIVADHSMVEK.Y | Y    | 88.02  | 1311.6857 | 12     | 0.2 | 656.8502 | 2 | 34.96 | 2        | F2:9288 | 12112021_RID_2349_DP2.raw | 4.5317E6 | 5.8499E |

total

8/2/22, 12:12 PM

proteins

| Peptide                     | Uniq -10lgP | Mass  | Length    | ppm | m/z  | z        | RT      | Fraction | Scan     | Source File               | Area F1  | Area F  |
|-----------------------------|-------------|-------|-----------|-----|------|----------|---------|----------|----------|---------------------------|----------|---------|
| SQLVATSEQQSYDR.F            | N           | 85.45 | 1773.8169 | 15  | 0.1  | 887.9158 | 2 35.26 | 3        | F3:9651  | 17112021_RID_2349_DP3.raw |          |         |
| K.LAIVADHSM(+15.99)VEK.Y    | Y           | 78.52 | 1327.6805 | 12  | 0.4  | 664.8478 | 2 35.33 | 1        | F1:10345 | 12112021_RID_2349_DP1.raw | 2.4019E6 | 2.9689E |
| R.TVNTVNEM(+15.99)YLPLNIR.V | Y           | 72.02 | 1791.9189 | 15  | 0.5  | 896.9672 | 2 56.15 | 2        | F2:16974 | 12112021_RID_2349_DP2.raw | 7.951E6  | 6.1112E |
| V.ATSEQQSYDR.F              | N           | 70.49 | 1346.5739 | 11  | 0.3  | 674.2944 | 2 23.13 | 2        | F2:5110  | 12112021_RID_2349_DP2.raw | 1.2012E5 | 4.4545E |
| R.TVNTVNEMYLPLNIR.V         | Y           | 66.01 | 1775.9240 | 15  | 0.2  | 888.9694 | 2 57.79 | 4        | F4:17087 | 17112021_RID_2349_DP4.raw | 8.7541E6 | 9.8614E |
| S.QLVATSEQQSYDR.F           | N           | 63.01 | 1686.7849 | 14  | 1.1  | 844.4006 | 2 47.86 | 5        | F5:13912 | 17112021_RID_2349_DP5.raw |          | 1.5966E |
| T.SEQQSYDR.F                | N           | 62.38 | 1174.4890 | 9   | 0.7  | 588.2522 | 2 21.94 | 2        | F2:4785  | 12112021_RID_2349_DP2.raw | 3.2418E4 | 2.9845E |
| A.TSEQQSYDR.F               | N           | 58.61 | 1275.5367 | 10  | 0.4  | 638.7759 | 2 22.62 | 5        | F5:5328  | 17112021_RID_2349_DP5.raw | 1.2834E5 | 4.8542E |
| K.WRGSDLLSR.K               | Y           | 50.67 | 1088.5726 | 9   | -0.1 | 545.2935 | 2 37.47 | 1        | F1:11043 | 12112021_RID_2349_DP1.raw | 4.0422E6 |         |
| A.TSEQQSYDRFR.Y             | N           | 45.69 | 1578.7063 | 12  | -0.5 | 527.2424 | 3 33.88 | 1        | F1:9791  | 12112021_RID_2349_DP1.raw | 5.1666E6 |         |
| T.SEQQSYDRFR.Y              | N           | 42.54 | 1477.6586 | 11  | 0.6  | 739.8370 | 2 32.22 | 3        | F3:8513  | 17112021_RID_2349_DP3.raw |          | 1.2544E |
| V.ATSEQQSYDRFR.Y            | N           | 41.91 | 1649.7434 | 13  | 0.5  | 550.9220 | 3 32.84 | 3        | F3:8815  | 17112021_RID_2349_DP3.raw | 1.9978E6 |         |
|                             |             |       |           |     |      |          |         |          |          |                           |          | total   |

QHR82712.1

[back to list](#)

[Protein Coverage](#) | [Supporting Peptides](#) |

Protein Coverage:

1 ALGNHEFDNG LDGLLDPLLK **NANFPILSAN IRPK**GPIASN ISGYILPYKI IN**VGSEKVGI IGYTTKETPV LSNPGPYLEF**

81 **RDEVEELQIH** ANKLTTTLGIN KIIALGHSGF LEDQRIAQKV KGVDVVVGGH TNTFLYSGSP PSTEVPAAGNY PFMVQSDDGR

161 **QVPVVQAYAF GKYLGYLNVV FDDKGNVIKA SGNPILLNKD** IPEDQDLKAE VNMKMIQLQS YSSQEIGKTI VYLNQTTQAC

241 RFQECNLGNL ICDAVIYNL RHPDDNEWNH VSMCIVNGGG IRSPIDERAN NGNKEGPF

Supporting Peptides:

| Peptide               | Uniq -10lgP | Mass  | Length    | ppm | m/z  | z        | RT      | Fraction | Scan     | Source File               | Area F1  | Area F2  | A             |
|-----------------------|-------------|-------|-----------|-----|------|----------|---------|----------|----------|---------------------------|----------|----------|---------------|
| K.NANFPILSANIRPK.G    | N           | 87.65 | 1553.8678 | 14  | 0.6  | 777.9417 | 2 47.24 | 1        | F1:14300 | 12112021_RID_2349_DP1.raw | 2.5082E7 | 3.0757E6 |               |
| R.QVPVVQAYAFGK.Y      | N           | 78.42 | 1305.7081 | 12  | 0.2  | 653.8615 | 2 46.67 | 2        | F2:13272 | 12112021_RID_2349_DP2.raw | 4.2275E6 | 4.4501E6 | 1.            |
| N.VGSEKVGIIGYTTK.E    | N           | 74.20 | 1450.8031 | 14  | 0.9  | 726.4095 | 2 36.48 | 1        | F1:10777 | 12112021_RID_2349_DP1.raw | 2.8559E6 |          |               |
| K.YLGYLNVVFDDKGNVIK.A | Y           | 73.37 | 1956.0356 | 17  | 0.4  | 979.0255 | 2 58.81 | 3        | F3:17436 | 17112021_RID_2349_DP3.raw |          | 6.057E5  | 4.            |
| R.DEVEELQIHANK.L      | N           | 70.10 | 1423.6943 | 12  | 0.6  | 712.8549 | 2 34.19 | 4        | F4:9279  | 17112021_RID_2349_DP4.raw |          | 2.6545E4 |               |
| K.ASGNPILLNK.D        | N           | 67.11 | 1025.5869 | 10  | -0.1 | 513.8007 | 2 34.04 | 1        | F1:9894  | 12112021_RID_2349_DP1.raw | 2.3772E7 | 7.6734E6 | 2.            |
| K.ETPVLSNPGPYLEFR.D   | N           | 63.99 | 1717.8674 | 15  | 0.3  | 859.9412 | 2 55.85 | 4        | F4:16529 | 17112021_RID_2349_DP4.raw |          |          |               |
| K.VGIIGYTTK.E         | N           | 60.94 | 950.5436  | 9   | -0.2 | 476.2790 | 2 37.93 | 1        | F1:11149 | 12112021_RID_2349_DP1.raw | 9.0552E6 | 3.6938E6 | 2.            |
| K.ASGNPILLNKD.I       | N           | 52.23 | 1140.6139 | 11  | 0.6  | 571.3146 | 2 34.93 | 4        | F4:9472  | 17112021_RID_2349_DP4.raw |          |          |               |
|                       |             |       |           |     |      |          |         |          |          |                           |          |          | total 9 pepti |

AFE84762.1

[back to list](#)

[Protein Coverage](#) | [Supporting Peptides](#) |

Protein Coverage:

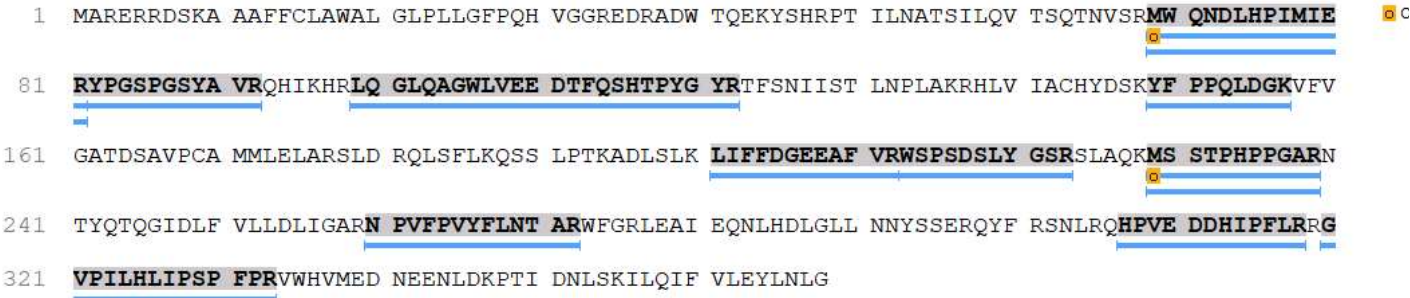

Supporting Peptides:

| Peptide                      | Uniq | -10lgP | Mass      | Length | ppm  | m/z      | z | RT    | Fraction | Scan     | Source File               | Area F1 | Area |
|------------------------------|------|--------|-----------|--------|------|----------|---|-------|----------|----------|---------------------------|---------|------|
| R.MWQNDLHPIMIER.Y            | N    | 92.13  | 1681.8069 | 13     | 0.1  | 841.9108 | 2 | 49.27 | 2        | F2:14104 | 12112021_RID_2349_DP2.raw | 1.384   |      |
| R.NPVFPVYFLNTAR.W            | N    | 83.53  | 1536.8088 | 13     | 0.7  | 769.4122 | 2 | 63.32 | 2        | F2:18598 | 12112021_RID_2349_DP2.raw | 7.791   |      |
| K.LIFFDGEEAFVR.W             | N    | 83.44  | 1441.7241 | 12     | 0.9  | 721.8700 | 2 | 63.41 | 2        | F2:18652 | 12112021_RID_2349_DP2.raw | 4.154   |      |
| R.WSPSDSLYGSR.S              | N    | 76.49  | 1253.5676 | 11     | -0.1 | 627.7910 | 2 | 42.62 | 2        | F2:11930 | 12112021_RID_2349_DP2.raw | 4.928   |      |
| R.YPGSPGSYAVR.Q              | N    | 69.52  | 1152.5563 | 11     | 0.6  | 577.2858 | 2 | 32.51 | 2        | F2:8432  | 12112021_RID_2349_DP2.raw | 8.721   |      |
| K.M(+15.99)SSTPHPPGAR.N      | Y    | 65.00  | 1152.5345 | 11     | 0.0  | 577.2745 | 2 | 18.26 | 2        | F2:4172  | 12112021_RID_2349_DP2.raw | 9.335   |      |
| K.MSSTPHPPGAR.N              | Y    | 61.11  | 1136.5397 | 11     | -0.9 | 569.2766 | 2 | 19.88 | 5        | F5:4334  | 17112021_RID_2349_DP5.raw | 2.139   |      |
| R.GVPILHLIPSPFPR.V           | N    | 55.94  | 1541.9082 | 14     | 0.5  | 771.9617 | 2 | 63.34 | 2        | F2:18577 | 12112021_RID_2349_DP2.raw | 4.547   |      |
| Q.HPVEDDHIPFLR.R             | N    | 53.57  | 1473.7365 | 12     | -0.1 | 492.2527 | 3 | 46.37 | 2        | F2:13060 | 12112021_RID_2349_DP2.raw | 7.548   |      |
| K.YFPPQLDGK.V                | N    | 51.22  | 1063.5338 | 9      | 0.4  | 532.7744 | 2 | 39.95 | 2        | F2:11061 | 12112021_RID_2349_DP2.raw | 3.278   |      |
| R.M(+15.99)WQNDLHPIMIER.Y    | N    | 44.14  | 1697.8018 | 13     | 2.2  | 849.9100 | 2 | 47.25 | 2        | F2:13379 | 12112021_RID_2349_DP2.raw | 1.065   |      |
| R.LQGLQAGWLVEEDTFQSHTPYGYR.T | N    | 38.86  | 2794.3350 | 24     | 0.8  | 932.4530 | 3 | 60.00 | 2        | F2:17677 | 12112021_RID_2349_DP2.raw | 1.957   |      |
| total 1                      |      |        |           |        |      |          |   |       |          |          |                           |         |      |

TRINITY\_DN554  
[back to list](#)

| [Protein Coverage](#) | [Supporting Peptides](#) |  
Protein Coverage:

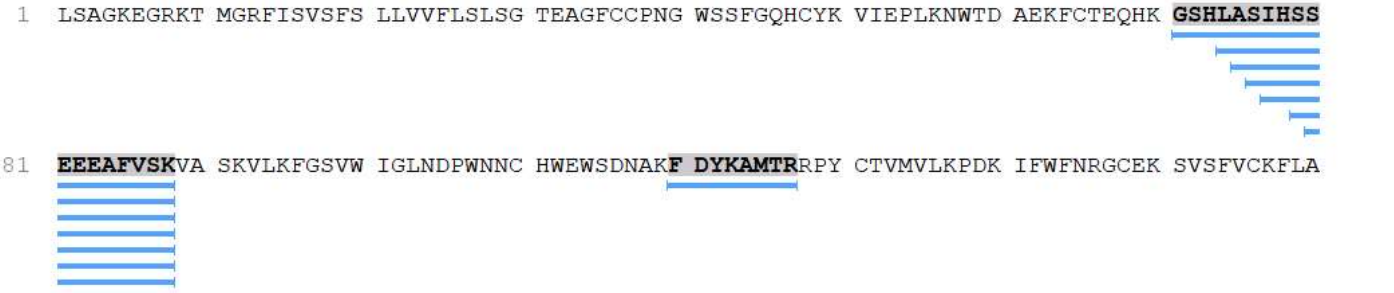

Supporting Peptides:

| Peptide                | Uniq | -10lgP | Mass      | Length | ppm | m/z      | z | RT    | Fraction | Scan    | Source File               | Area F1 | Area F2 | Area F3 | Area F4 |
|------------------------|------|--------|-----------|--------|-----|----------|---|-------|----------|---------|---------------------------|---------|---------|---------|---------|
| K.GSHLASIHSSEEEAFVSK.V | Y    | 110.07 | 1913.9119 | 18     | 0.2 | 957.9634 | 2 | 35.00 | 5        | F5:9814 | 17112021_RID_2349_DP5.raw |         |         |         | 2       |
| H.LASIHSSSEEEAFVSK.V   | Y    | 75.78  | 1632.7994 | 15     | 0.6 | 545.2741 | 3 | 35.12 | 5        | F5:9694 | 17112021_RID_2349_DP5.raw |         |         |         | 2       |
| A.SIHSSEEEAFVSK.V      | Y    | 74.21  | 1448.6783 | 13     | 0.6 | 725.3469 | 2 | 28.87 | 5        | F5:7463 | 17112021_RID_2349_DP5.raw |         |         |         | 3       |
| S.IHSSEEEAFVSK.V       | Y    | 64.59  | 1361.6462 | 12     | 0.3 | 681.8306 | 2 | 27.01 | 5        | F5:6866 | 17112021_RID_2349_DP5.raw |         |         |         | 1       |
| H.SSEEEAFVSK.V         | Y    | 58.46  | 1111.5033 | 10     | 0.4 | 556.7592 | 2 | 28.18 | 5        | F5:7267 | 17112021_RID_2349_DP5.raw |         |         |         | 7       |
| L.ASIHSSEEEAFVSK.V     | Y    | 54.72  | 1519.7155 | 14     | 0.6 | 507.5794 | 3 | 30.04 | 5        | F5:7917 | 17112021_RID_2349_DP5.raw |         |         |         | 1       |
| S.SEEAFVSK.V           | Y    | 47.15  | 1024.4713 | 9      | 1.0 | 513.2435 | 2 | 27.17 | 5        | F5:6857 | 17112021_RID_2349_DP5.raw |         |         |         | 2       |
| K.FDYKAMTR.R           | Y    | 46.61  | 1030.4906 | 8      | 0.0 | 516.2526 | 2 | 31.54 | 5        | F5:8441 | 17112021_RID_2349_DP5.raw |         |         |         | 1       |
| total 8 peptides       |      |        |           |        |     |          |   |       |          |         |                           |         |         |         |         |

TRINITY\_DN1031  
[back to list](#)

[Protein Coverage](#) | [Supporting Peptides](#) |

Protein Coverage:

|     |            |             |            |            |            |            |            |            |            |            |  |
|-----|------------|-------------|------------|------------|------------|------------|------------|------------|------------|------------|--|
| 1   | MEKLILLTWA | TGFLVVNCVQ  | LHQQLQTLPM | LGDVYHVTGI | LKLPYAEIEE | PFEAWFNKTG | GKSR       | IQYYDG     | QVITYQLGYI |            |  |
| 81  | KPFGASFKVT | PETTETEVENI | KECFQFNGTS | ENPVRPQSLF | PNLTNFQPV  | HEHYNGQHCT | VLESVSYWGK | KKNTYK     | FWVA       |            |  |
| 161 | DGSRGPLPVH | YEMK        | GYNTLL     | GSHYDKYEID | YISYSHSF   | SP         | SIFNLPPGIK | CAHWPKGGPE | HRILANPMQE | FVGGTGEVSQ |  |
| 241 | HHEHLFHHYK | KKFRKTYKNK  | KEIEHRQHN  | IHNMYRIHSK | NRANLSFKLA | ANHLADRTPE | ELAVLRGRLQ | TDEPR      | KAGAF      |            |  |
| 321 | PDSYRGLTL  | PDSLDWRLYG  | AVTRVKDQAV | CGSCWSFATT | GALEGAIFLK | TGVLTPLSQQ | VLIDCSWGFG | NRACDGGQEP |            |            |  |
| 401 | QAFEWIMKHG | GIASAEAYGP  | YMGQNGYCHY | NQSELIAPIA | GYIVITSQNI | TDLKAALYKH | GPIAVNVDAS | HK         | SFAFYSSG   |            |  |
| 481 | IYYEPNCGNT | TMELDHA     | VLAVL      | RGRLQ      | TDEPR      | KAGAF      |            |            |            |            |  |

Supporting Peptides:

| Peptide                      | Uniq | -10lgP | Mass      | Length | ppm  | m/z       | z | RT    | Fraction | Scan     | Source File               | Area F1 | Area |
|------------------------------|------|--------|-----------|--------|------|-----------|---|-------|----------|----------|---------------------------|---------|------|
| R.IQYYDGQVITYQLGYIKPFGASFK.V | Y    | 89.84  | 2798.4319 | 24     | 0.6  | 933.8185  | 3 | 64.33 | 3        | F3:19267 | 17112021_RID_2349_DP3.raw |         |      |
| K.VTPETTETEVENI.K            | Y    | 80.09  | 1459.7406 | 13     | -0.1 | 730.8775  | 2 | 33.29 | 3        | F3:8992  | 17112021_RID_2349_DP3.raw |         |      |
| K.HGPIAVNVDASHK.S            | Y    | 76.92  | 1343.6946 | 13     | 0.3  | 672.8547  | 2 | 28.24 | 2        | F2:6976  | 12112021_RID_2349_DP2.raw | 1.3219  |      |
| R.GPLPVHYEMK.G               | Y    | 72.68  | 1169.5903 | 10     | 0.8  | 585.8029  | 2 | 35.42 | 3        | F3:9693  | 17112021_RID_2349_DP3.raw |         |      |
| R.IQYYDGQVITYQLGYIKPFGASFK.V | Y    | 66.66  | 2308.1780 | 19     | 0.9  | 1155.0973 | 2 | 67.58 | 3        | F3:20288 | 17112021_RID_2349_DP3.raw |         |      |
| R.GLTLPDSLDWRL.L             | Y    | 63.18  | 1271.6510 | 11     | 0.0  | 636.8328  | 2 | 58.34 | 2        | F2:17069 | 12112021_RID_2349_DP2.raw | 1.2031  |      |
| R.GPLPVHYEM(+15.99)K.G       | Y    | 57.86  | 1185.5852 | 10     | -0.2 | 396.2023  | 3 | 29.39 | 3        | F3:7623  | 17112021_RID_2349_DP3.raw |         |      |
| R.KAGAFPSDSYR.G              | Y    | 51.41  | 1197.5778 | 11     | 0.2  | 599.7963  | 2 | 27.19 | 2        | F2:6677  | 12112021_RID_2349_DP2.raw | 4.1931  |      |
| K.FWVADGSR.G                 | Y    | 49.35  | 936.4453  | 8      | 0.1  | 469.2300  | 2 | 37.70 | 3        | F3:10542 | 17112021_RID_2349_DP3.raw |         |      |
| F.SPSIFNLPPGIK.C             | Y    | 45.13  | 1268.7128 | 12     | 0.8  | 635.3642  | 2 | 55.02 | 3        | F3:16255 | 17112021_RID_2349_DP3.raw |         |      |

total 1

TRINITY\_DN1031

[back to list](#)

[Protein Coverage](#) | [Supporting Peptides](#) |

Protein Coverage:

|     |            |             |            |            |            |            |            |            |            |            |  |
|-----|------------|-------------|------------|------------|------------|------------|------------|------------|------------|------------|--|
| 1   | MEKLILLTWA | TGFLVVNCVQ  | LHQQLQTLPM | LGDVYHVTGI | LKLPYAEIEE | PFEAWFNKTG | GKSR       | IQYYDG     | QVITYQLGYI |            |  |
| 81  | KPFGASFKVT | PETTETEVENI | KECFQFNGTS | ENPVRPQSLF | PNLTNFQPV  | HEHYNGQHCT | VLESVSYWGK | KKNTYK     | FWVA       |            |  |
| 161 | DGSRGPLPVH | YEMK        | GYNTLL     | GSHYDKYEID | YISYSHSF   | SP         | SIFNLPPGIK | CAHWPKGGPE | HRILANPMQE | FVGGTGEVSQ |  |
| 241 | HHEHLFHHYK | KKFRKTYKNK  | KEIEHRQHN  | IHNMYRIHSK | NRANLSFKLA | ANHLADRTPE | ELAVLRGRLQ | TDEPR      | KAGAF      |            |  |
| 321 | PDSYRGLTL  | PDSLDWRLYG  | AVTRVKDQAV | CGSCWSFATT | GALEGAIFLK | TGVLTPLSQQ | VLIDCSWGFG | NRACDGGQEP |            |            |  |
| 401 | QAFEWIMKHG | GIASAEAYGP  | YMGQNGYCHY | NQSELIAPIA | GYIVITSQNI | TDLKAALYKH | GPIAVNVDAS | HK         | SFAFYSSG   |            |  |
| 481 | IYYEPNCGNT | TMELDHA     | VLAVL      | RGRLQ      | TDEPR      | KAGAF      |            |            |            |            |  |

Supporting Peptides:

| Peptide                      | Uniq | -10lgP | Mass      | Length | ppm  | m/z       | z | RT    | Fraction | Scan     | Source File               | Area F1 | Area |
|------------------------------|------|--------|-----------|--------|------|-----------|---|-------|----------|----------|---------------------------|---------|------|
| R.IQYYDGQVITYQLGYIKPFGASFK.V | Y    | 89.84  | 2798.4319 | 24     | 0.6  | 933.8185  | 3 | 64.33 | 3        | F3:19267 | 17112021_RID_2349_DP3.raw |         |      |
| K.VTPETTETEVENI.K            | Y    | 80.09  | 1459.7406 | 13     | -0.1 | 730.8775  | 2 | 33.29 | 3        | F3:8992  | 17112021_RID_2349_DP3.raw |         |      |
| K.HGPIAVNVDASHK.S            | Y    | 76.92  | 1343.6946 | 13     | 0.3  | 672.8547  | 2 | 28.24 | 2        | F2:6976  | 12112021_RID_2349_DP2.raw | 1.3219  |      |
| R.GPLPVHYEMK.G               | Y    | 72.68  | 1169.5903 | 10     | 0.8  | 585.8029  | 2 | 35.42 | 3        | F3:9693  | 17112021_RID_2349_DP3.raw |         |      |
| R.IQYYDGQVITYQLGYIKPFGASFK.V | Y    | 66.66  | 2308.1780 | 19     | 0.9  | 1155.0973 | 2 | 67.58 | 3        | F3:20288 | 17112021_RID_2349_DP3.raw |         |      |
| R.GLTLPDSLDWRL.L             | Y    | 63.18  | 1271.6510 | 11     | 0.0  | 636.8328  | 2 | 58.34 | 2        | F2:17069 | 12112021_RID_2349_DP2.raw | 1.2031  |      |

total 1

| Peptide                | Uniq | -10lgP | Mass      | Length | ppm  | m/z      | z | RT    | Fraction | Scan     | Source File               | Area F1 | Area    |
|------------------------|------|--------|-----------|--------|------|----------|---|-------|----------|----------|---------------------------|---------|---------|
| R.GPLPVHYEM(+15.99)K.G | Y    | 57.86  | 1185.5852 | 10     | -0.2 | 396.2023 | 3 | 29.39 | 3        | F3:7623  | 17112021_RID_2349_DP3.raw |         |         |
| R.KAGAFPSDSYR.G        | Y    | 51.41  | 1197.5778 | 11     | 0.2  | 599.7963 | 2 | 27.19 | 2        | F2:6677  | 12112021_RID_2349_DP2.raw | 4.193E6 |         |
| K.FWVADGSR.G           | Y    | 49.35  | 936.4453  | 8      | 0.1  | 469.2300 | 2 | 37.70 | 3        | F3:10542 | 17112021_RID_2349_DP3.raw |         |         |
| F.SPSIFNLPPGIK.C       | Y    | 45.13  | 1268.7128 | 12     | 0.8  | 635.3642 | 2 | 55.02 | 3        | F3:16255 | 17112021_RID_2349_DP3.raw |         |         |
|                        |      |        |           |        |      |          |   |       |          |          |                           |         | total 1 |

TRINITY\_DN1031  
[back to list](#)

[Protein Coverage](#) | [Supporting Peptides](#) |  
Protein Coverage:

|     |            |            |            |            |            |            |            |            |            |            |  |  |  |
|-----|------------|------------|------------|------------|------------|------------|------------|------------|------------|------------|--|--|--|
| 1   | MEKLILLTWA | TGFLVVNCVQ | LHQQLQTLPM | LGDVYHVTGI | LKLPYAEIEE | PFEAWFNKTG | GKSR       | IQYYDG     | QVITYQLGYI |            |  |  |  |
| 81  | KPFGASFKVT | PETTETEVI  | KECFQFNGTS | ENPVRPQSLF | PNLTNFQPV  | HEHYNGQHCT | VLESVSYWGK | KKNTYK     | FWVA       |            |  |  |  |
| 161 | DGSRGPLPVH | YEMK       | GYNTLL     | GSHYDKEYID | YISYSHSF   | SP         | SIFNLPPGIK | CAHWPKGGPE | HRILANPMQE | FVGGTGEVSQ |  |  |  |
| 241 | HHEHLFHHTK | KKFRKTYKNK | KEIEHRQHN  | IHNMYRIHSK | NRANLSFKLA | ANHLADRTPE | ELAVLRGRLQ | TDEPR      | KAGAF      |            |  |  |  |
| 321 | PSDSYRGLTL | PDSLDR     | LYG        | AVTRVKDQAV | CGSCWSFATT | GALEGAIFLK | TGVLTPLSQQ | VLIDCSWGFG | NRACDGGQEP |            |  |  |  |
| 401 | QAFEWIMKHG | GIASAEAYGP | YMGQNGYCHY | NQSELIAPIA | GYIVITSQNI | TDLKAALYKH | GPIAVNVDAS | HK         | SFAFYSSG   |            |  |  |  |
| 481 | IYYEPNCNGT | TMELDHAVLA | VGYGDLQGE  | P          | YWLKNSWST  | YWGNDGYILM | SMKENNCGVA | SSATYPILA  |            |            |  |  |  |

Supporting Peptides:

| Peptide                      | Uniq | -10lgP | Mass      | Length | ppm  | m/z       | z | RT    | Fraction | Scan     | Source File               | Area F1 | Area    |
|------------------------------|------|--------|-----------|--------|------|-----------|---|-------|----------|----------|---------------------------|---------|---------|
| R.IQYYDGQVITYQLGYIKPFGASFK.V | Y    | 89.84  | 2798.4319 | 24     | 0.6  | 933.8185  | 3 | 64.33 | 3        | F3:19267 | 17112021_RID_2349_DP3.raw |         |         |
| K.VTPETTETEVIK.E             | Y    | 80.09  | 1459.7406 | 13     | -0.1 | 730.8775  | 2 | 33.29 | 3        | F3:8992  | 17112021_RID_2349_DP3.raw |         |         |
| K.HGPIAVNVDASHK.S            | Y    | 76.92  | 1343.6946 | 13     | 0.3  | 672.8547  | 2 | 28.24 | 2        | F2:6976  | 12112021_RID_2349_DP2.raw | 1.321E6 |         |
| R.GPLPVHYEMK.G               | Y    | 72.68  | 1169.5903 | 10     | 0.8  | 585.8029  | 2 | 35.42 | 3        | F3:9693  | 17112021_RID_2349_DP3.raw |         |         |
| R.IQYYDGQVITYQLGYIKPFG       | Y    | 66.66  | 2308.1780 | 19     | 0.9  | 1155.0973 | 2 | 67.58 | 3        | F3:20288 | 17112021_RID_2349_DP3.raw |         |         |
| R.GLTLPSDLDR.L               | Y    | 63.18  | 1271.6510 | 11     | 0.0  | 636.8328  | 2 | 58.34 | 2        | F2:17069 | 12112021_RID_2349_DP2.raw | 1.203E6 |         |
| R.GPLPVHYEM(+15.99)K.G       | Y    | 57.86  | 1185.5852 | 10     | -0.2 | 396.2023  | 3 | 29.39 | 3        | F3:7623  | 17112021_RID_2349_DP3.raw |         |         |
| R.KAGAFPSDSYR.G              | Y    | 51.41  | 1197.5778 | 11     | 0.2  | 599.7963  | 2 | 27.19 | 2        | F2:6677  | 12112021_RID_2349_DP2.raw | 4.193E6 |         |
| K.FWVADGSR.G                 | Y    | 49.35  | 936.4453  | 8      | 0.1  | 469.2300  | 2 | 37.70 | 3        | F3:10542 | 17112021_RID_2349_DP3.raw |         |         |
| F.SPSIFNLPPGIK.C             | Y    | 45.13  | 1268.7128 | 12     | 0.8  | 635.3642  | 2 | 55.02 | 3        | F3:16255 | 17112021_RID_2349_DP3.raw |         |         |
|                              |      |        |           |        |      |           |   |       |          |          |                           |         | total 1 |

Q9PT40.1  
[back to list](#)

[Protein Coverage](#) | [Supporting Peptides](#) |  
Protein Coverage:

|     |             |            |            |            |            |             |            |         |         |            |        |  |  |
|-----|-------------|------------|------------|------------|------------|-------------|------------|---------|---------|------------|--------|--|--|
| 1   | MVLIRVLANL  | LVLQLSYAQK | SSELVIGGDE | CNINEHFPFV | ALHTARSKRF | Y           | CAGTLINQE  | WVLTAAR | CDR     | KNIR       | IILGVH |  |  |
| 81  | SKNVPNEDQQ  | IRVPKEKFFC | LSSK       | TYTRWD     | KDIMLIRLKK | PVNDSTHIVP  | LSPSSPPSV  | GSVCR   | IMGWG   | TITTTKVTP  |        |  |  |
| 161 | DVPH        | CANINM     | FDYSVCRKVY | RKLPEKSRTL | CAGILQGGID | SCKVDNNGGPL | ICNGQIQGIV | SWG     | GHPCAQP | HKPALYTNVF |        |  |  |
| 241 | DYTDWIIQSII | AGNITATCPP |            |            |            |             |            |         |         |            |        |  |  |

Supporting Peptides:

| Peptide           | Uniq | -10lgP | Mass      | Length | ppm  | m/z      | z | RT    | Fraction | Scan     | Source File               | Area F1  | Area F2  | Area |
|-------------------|------|--------|-----------|--------|------|----------|---|-------|----------|----------|---------------------------|----------|----------|------|
| K.TYTRWDKDIMLIR.L | N    | 82.41  | 1709.8923 | 13     | 0.4  | 570.9716 | 3 | 49.33 | 3        | F3:14370 | 17112021_RID_2349_DP3.raw | 1.4395E6 | 1.73     |      |
| R.IMGWGTITTTK.V   | N    | 78.23  | 1207.6271 | 11     | -0.4 | 604.8206 | 2 | 47.11 | 3        | F3:13741 | 17112021_RID_2349_DP3.raw | 1.7839E6 | 2.7374E7 | 1.67 |
|                   |      |        |           |        |      |          |   |       |          |          |                           |          |          |      |
|                   |      |        |           |        |      |          |   |       |          |          |                           |          | total 1  |      |

8/2/22, 12:12 PM

proteins

| Peptide                 | Uniq | -10lgP | Mass      | Length | ppm  | m/z      | z | RT    | Fraction | Scan     | Source File               | Area F1  | Area F2  | Are  |
|-------------------------|------|--------|-----------|--------|------|----------|---|-------|----------|----------|---------------------------|----------|----------|------|
| K.NVPNEDQQIRVPK.E       | Y    | 74.15  | 1535.8055 | 13     | 0.1  | 768.9101 | 2 | 30.88 | 2        | F2:7842  | 12112021_RID_2349_DP2.raw | 1.5351E7 | 1.45     |      |
| K.NVPNEDQQIR.V          | Y    | 72.95  | 1211.5895 | 10     | 0.4  | 606.8022 | 2 | 24.54 | 2        | F2:5672  | 12112021_RID_2349_DP2.raw | 3.788E5  | 1.1029E8 | 3.95 |
| R.IM(+15.99)GWGTITTTK.V | N    | 67.99  | 1223.6221 | 11     | 0.3  | 612.8185 | 2 | 40.75 | 2        | F2:11290 | 12112021_RID_2349_DP2.raw | 7.1945E5 | 1.2257E7 | 3.31 |
| R.WDKDIMLIR.L           | N    | 59.98  | 1188.6324 | 9      | 0.8  | 595.3240 | 2 | 47.61 | 2        | F2:13483 | 12112021_RID_2349_DP2.raw | 2.0105E7 | 1.37     |      |
| N.VPNEDQQIR.V           | Y    | 58.49  | 1097.5465 | 9      | 1.3  | 549.7812 | 2 | 22.54 | 3        | F3:5342  | 17112021_RID_2349_DP3.raw | 1.7116E5 | 6.42     |      |
| R.WDKDIM(+15.99)LIR.L   | N    | 54.14  | 1204.6274 | 9      | 0.6  | 603.3214 | 2 | 42.22 | 2        | F2:11819 | 12112021_RID_2349_DP2.raw | 1.4264E7 | 3.00     |      |
| A.GTLINQEWVLTAAR.C      | N    | 48.88  | 1570.8467 | 14     | 0.5  | 786.4310 | 2 | 56.07 | 3        | F3:16574 | 17112021_RID_2349_DP3.raw |          | 2.60     |      |
| V.PNEDQQIRVPK.E         | Y    | 48.77  | 1322.6942 | 11     | 0.1  | 662.3544 | 2 | 30.86 | 2        | F2:7883  | 12112021_RID_2349_DP2.raw | 2.0109E5 |          |      |
| W.DKDIMLIR.L            | N    | 44.22  | 1002.5532 | 8      | -0.5 | 502.2836 | 2 | 37.38 | 3        | F3:10341 | 17112021_RID_2349_DP3.raw |          | 5.86     |      |
| R.IILGVHISK.N           | Y    | 43.01  | 865.5385  | 8      | 0.7  | 433.7769 | 2 | 26.46 | 2        | F2:6227  | 12112021_RID_2349_DP2.raw | 3.7847E7 | 1.23     |      |
| W.DKDIM(+15.99)LIR.L    | N    | 39.37  | 1018.5481 | 8      | 0.3  | 510.2815 | 2 | 31.54 | 3        | F3:8358  | 17112021_RID_2349_DP3.raw |          | 1.70     |      |
| K.VTYPDVPH.C            | N    | 39.33  | 926.4498  | 8      | -0.6 | 464.2319 | 2 | 35.54 | 6        | F6:9635  | 17112021_RID_2349_DP6.raw |          |          |      |
| total 1                 |      |        |           |        |      |          |   |       |          |          |                           |          |          |      |

CAB62591.1  
[back to list](#)

[Protein Coverage](#) | [Supporting Peptides](#) |  
Protein Coverage:

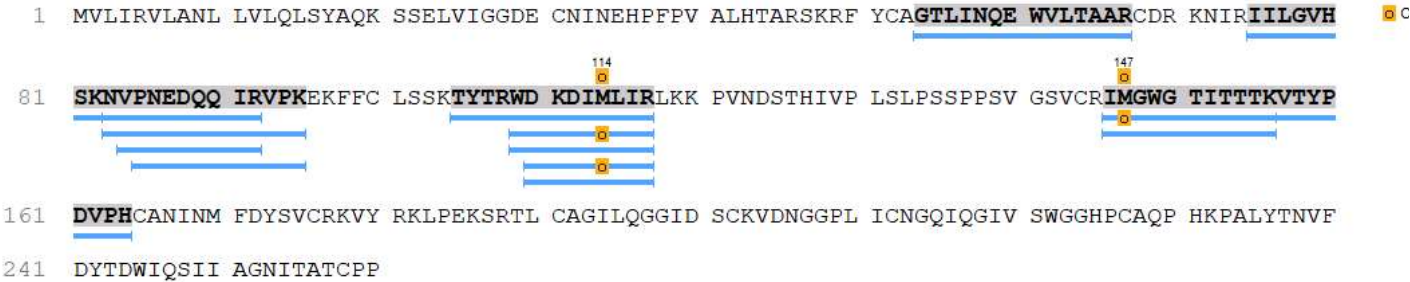

Supporting Peptides:

| Peptide                 | Uniq | -10lgP | Mass      | Length | ppm  | m/z      | z | RT    | Fraction | Scan     | Source File               | Area F1  | Area F2  | Are  |
|-------------------------|------|--------|-----------|--------|------|----------|---|-------|----------|----------|---------------------------|----------|----------|------|
| K.TYTRWDKDIMLIR.L       | N    | 82.41  | 1709.8923 | 13     | 0.4  | 570.9716 | 3 | 49.33 | 3        | F3:14370 | 17112021_RID_2349_DP3.raw | 1.4395E6 | 1.73     |      |
| R.IMGWGTITTTK.V         | N    | 78.23  | 1207.6271 | 11     | -0.4 | 604.8206 | 2 | 47.11 | 3        | F3:13741 | 17112021_RID_2349_DP3.raw | 1.7839E6 | 2.7374E7 | 1.67 |
| K.NVPNEDQQIRVPK.E       | Y    | 74.15  | 1535.8055 | 13     | 0.1  | 768.9101 | 2 | 30.88 | 2        | F2:7842  | 12112021_RID_2349_DP2.raw | 1.5351E7 | 1.45     |      |
| K.NVPNEDQQIR.V          | Y    | 72.95  | 1211.5895 | 10     | 0.4  | 606.8022 | 2 | 24.54 | 2        | F2:5672  | 12112021_RID_2349_DP2.raw | 3.788E5  | 1.1029E8 | 3.95 |
| R.IM(+15.99)GWGTITTTK.V | N    | 67.99  | 1223.6221 | 11     | 0.3  | 612.8185 | 2 | 40.75 | 2        | F2:11290 | 12112021_RID_2349_DP2.raw | 7.1945E5 | 1.2257E7 | 3.31 |
| R.WDKDIMLIR.L           | N    | 59.98  | 1188.6324 | 9      | 0.8  | 595.3240 | 2 | 47.61 | 2        | F2:13483 | 12112021_RID_2349_DP2.raw | 2.0105E7 | 1.37     |      |
| N.VPNEDQQIR.V           | Y    | 58.49  | 1097.5465 | 9      | 1.3  | 549.7812 | 2 | 22.54 | 3        | F3:5342  | 17112021_RID_2349_DP3.raw | 1.7116E5 | 6.42     |      |
| R.WDKDIM(+15.99)LIR.L   | N    | 54.14  | 1204.6274 | 9      | 0.6  | 603.3214 | 2 | 42.22 | 2        | F2:11819 | 12112021_RID_2349_DP2.raw | 1.4264E7 | 3.00     |      |
| A.GTLINQEWVLTAAR.C      | N    | 48.88  | 1570.8467 | 14     | 0.5  | 786.4310 | 2 | 56.07 | 3        | F3:16574 | 17112021_RID_2349_DP3.raw |          | 2.60     |      |
| V.PNEDQQIRVPK.E         | Y    | 48.77  | 1322.6942 | 11     | 0.1  | 662.3544 | 2 | 30.86 | 2        | F2:7883  | 12112021_RID_2349_DP2.raw | 2.0109E5 |          |      |
| W.DKDIMLIR.L            | N    | 44.22  | 1002.5532 | 8      | -0.5 | 502.2836 | 2 | 37.38 | 3        | F3:10341 | 17112021_RID_2349_DP3.raw |          | 5.86     |      |
| R.IILGVHISK.N           | Y    | 43.01  | 865.5385  | 8      | 0.7  | 433.7769 | 2 | 26.46 | 2        | F2:6227  | 12112021_RID_2349_DP2.raw | 3.7847E7 | 1.23     |      |
| W.DKDIM(+15.99)LIR.L    | N    | 39.37  | 1018.5481 | 8      | 0.3  | 510.2815 | 2 | 31.54 | 3        | F3:8358  | 17112021_RID_2349_DP3.raw |          | 1.70     |      |
| K.VTYPDVPH.C            | N    | 39.33  | 926.4498  | 8      | -0.6 | 464.2319 | 2 | 35.54 | 6        | F6:9635  | 17112021_RID_2349_DP6.raw |          |          |      |
| total 1                 |      |        |           |        |      |          |   |       |          |          |                           |          |          |      |

P0DL42.1  
[back to list](#)

[Protein Coverage](#) | [Supporting Peptides](#) |

Protein Coverage:

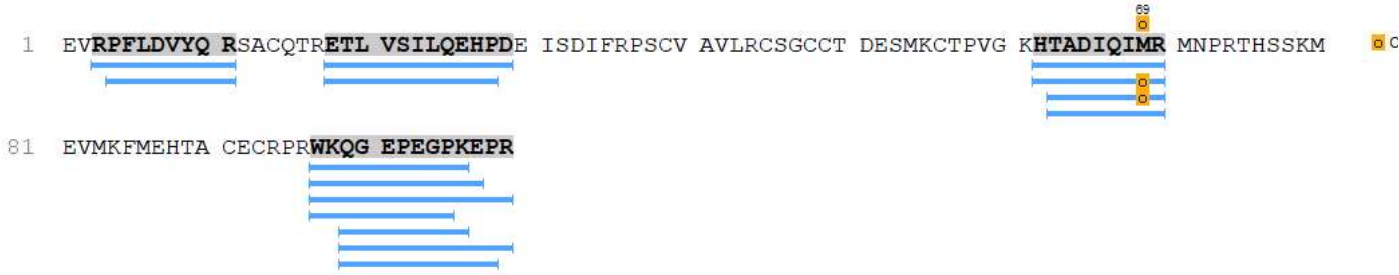

Supporting Peptides:

| Peptide               | Uniq | -10lgP | Mass      | Length | ppm  | m/z      | z | RT    | Fraction | Scan     | Source File               | Area F1 | Area F2 | Area F3 | Area F4 | Area F5 |
|-----------------------|------|--------|-----------|--------|------|----------|---|-------|----------|----------|---------------------------|---------|---------|---------|---------|---------|
| R.WKQGEPEGPK EPR      | Y    | 78.94  | 1536.7684 | 13     | -0.2 | 769.3914 | 2 | 21.61 | 7        | F7:5034  | 17112021_RID_2349_DP7.raw |         |         |         |         |         |
| K.HTADIQIMR.M         | Y    | 70.22  | 1083.5496 | 9      | 0.5  | 542.7823 | 2 | 29.75 | 7        | F7:8013  | 17112021_RID_2349_DP7.raw |         |         |         |         |         |
| K.QGEPEGPK EPR        | Y    | 69.86  | 1222.5941 | 11     | -0.4 | 612.3041 | 2 | 17.34 | 7        | F7:3495  | 17112021_RID_2349_DP7.raw |         |         |         |         |         |
| K.HTADIQIM(+15.99)R.M | Y    | 62.06  | 1099.5444 | 9      | 0.2  | 550.7796 | 2 | 27.83 | 7        | F7:7145  | 17112021_RID_2349_DP7.raw |         |         |         |         |         |
| R.WKQGEPEGPK.E        | Y    | 53.45  | 1154.5720 | 10     | 0.0  | 578.2933 | 2 | 19.26 | 7        | F7:4324  | 17112021_RID_2349_DP7.raw |         |         |         |         |         |
| R.PFLDVYQR.S          | N    | 49.73  | 1036.5342 | 8      | -0.1 | 519.2743 | 2 | 44.38 | 7        | F7:12800 | 17112021_RID_2349_DP7.raw |         |         |         |         | 0       |
| H.TADIQIMR.M          | Y    | 49.17  | 946.4906  | 8      | -0.5 | 474.2523 | 2 | 35.36 | 7        | F7:9694  | 17112021_RID_2349_DP7.raw |         |         |         |         |         |
| R.ETLVSILQEHPD.E      | Y    | 48.06  | 1379.6932 | 12     | 0.5  | 690.8542 | 2 | 54.14 | 7        | F7:16136 | 17112021_RID_2349_DP7.raw |         |         |         |         |         |
| R.ETLVSILQEHP.D       | Y    | 47.00  | 1264.6663 | 11     | 0.4  | 633.3406 | 2 | 55.20 | 7        | F7:16471 | 17112021_RID_2349_DP7.raw |         |         |         |         |         |
| V.RPFLDVYQR.S         | N    | 45.90  | 1192.6353 | 9      | 1.7  | 597.3259 | 2 | 38.63 | 7        | F7:10909 | 17112021_RID_2349_DP7.raw |         |         |         |         |         |
| K.QGEPEGPK EPR        | Y    | 45.10  | 1066.4930 | 10     | -0.3 | 534.2537 | 2 | 21.94 | 7        | F7:5155  | 17112021_RID_2349_DP7.raw |         |         |         |         |         |
| R.WKQGEPEGPK.K        | Y    | 44.23  | 1026.4771 | 9      | 0.6  | 514.2461 | 2 | 25.35 | 7        | F7:6256  | 17112021_RID_2349_DP7.raw |         |         |         |         |         |
| K.QGEPEGPK.E          | Y    | 43.80  | 840.3977  | 8      | 0.3  | 421.2063 | 2 | 14.33 | 7        | F7:2604  | 17112021_RID_2349_DP7.raw |         |         |         |         |         |
| R.WKQGEPEGPK E.P      | Y    | 42.99  | 1283.6145 | 11     | 0.6  | 642.8149 | 2 | 21.26 | 7        | F7:4833  | 17112021_RID_2349_DP7.raw |         |         |         |         |         |
| H.TADIQIM(+15.99)R.M  | Y    | 40.76  | 962.4855  | 8      | -0.7 | 482.2497 | 2 | 28.10 | 7        | F7:7206  | 17112021_RID_2349_DP7.raw |         |         |         |         |         |

total 15 peptides

Q4VM07.1

[back to list](#)

[Protein Coverage](#) | [Supporting Peptides](#) |

Protein Coverage:

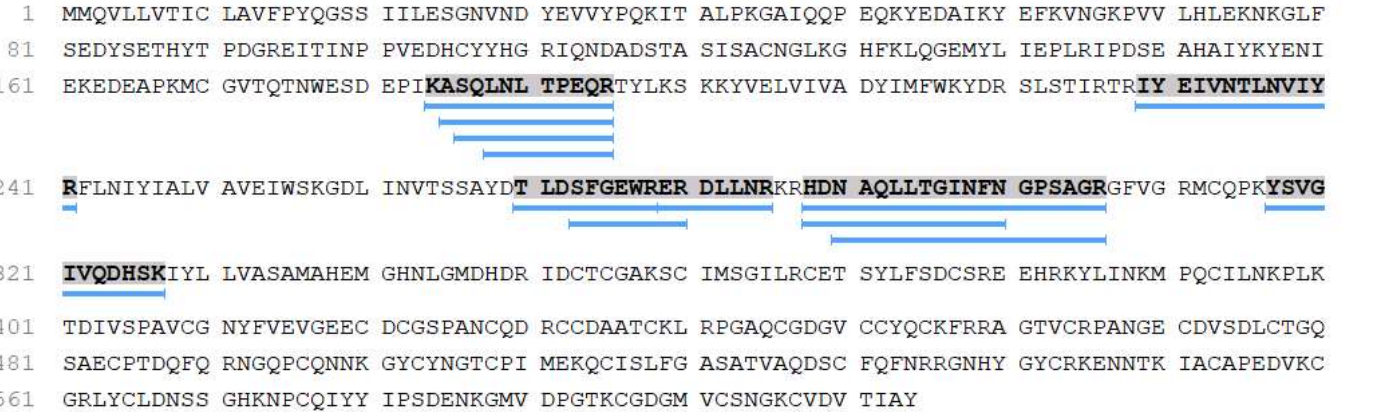

Supporting Peptides:

| Peptide                  | Uniq | -10lgP | Mass      | Length | ppm | m/z      | z | RT    | Fraction | Scan     | Source File               | Area F1  | Area F2  |
|--------------------------|------|--------|-----------|--------|-----|----------|---|-------|----------|----------|---------------------------|----------|----------|
| R.IYEIVNTLNVIYR.F        | N    | 74.30  | 1608.8875 | 13     | 0.4 | 805.4514 | 2 | 61.67 | 3        | F3:18319 | 17112021_RID_2349_DP3.raw |          |          |
| R.HDNAQLLTGINFN GPSAGR.G | Y    | 73.01  | 1980.9766 | 19     | 0.3 | 991.4958 | 2 | 49.32 | 1        | F1:15000 | 12112021_RID_2349_DP1.raw | 2.0256E6 |          |
| K.YSVGIVQDHSK.I          | Y    | 72.55  | 1231.6196 | 11     | 0.5 | 616.8174 | 2 | 28.91 | 3        | F3:7512  | 17112021_RID_2349_DP3.raw | 3.3389E5 | 4.2446E5 |
| I.KASQLNL TPEQR.T        | N    | 68.58  | 1383.7469 | 12     | 0.5 | 692.8811 | 2 | 28.68 | 1        | F1:8063  | 12112021_RID_2349_DP1.raw | 1.981E6  | 1.3728E5 |

total 12

| Peptide               | Uniq | -10lgP | Mass      | Length | ppm  | m/z      | z | RT    | Fraction | Scan     | Source File               | Area F1  | Area F2  |
|-----------------------|------|--------|-----------|--------|------|----------|---|-------|----------|----------|---------------------------|----------|----------|
| A.SQLNLTPEQR.T        | N    | 61.22  | 1184.6150 | 10     | 0.3  | 593.3149 | 2 | 32.62 | 1        | F1:9376  | 12112021_RID_2349_DP1.raw | 1.0663E7 | 3.1363E6 |
| K.ASQLNLTPEQR.T       | N    | 61.13  | 1255.6521 | 11     | 0.9  | 628.8339 | 2 | 32.86 | 2        | F2:8565  | 12112021_RID_2349_DP2.raw | 5.7571E7 | 1.162E7  |
| D.SFGEWRER.D          | N    | 55.07  | 1065.4991 | 8      | 0.1  | 533.7569 | 2 | 31.26 | 2        | F2:7954  | 12112021_RID_2349_DP2.raw | 6.0265E6 | 2.4122E6 |
| D.TLDSFGEWR.E         | N    | 52.86  | 1109.5142 | 9      | 0.7  | 555.7648 | 2 | 47.54 | 2        | F2:13529 | 12112021_RID_2349_DP2.raw |          | 8.0796E4 |
| R.HDNAQLLTGINFN.G     | N    | 48.53  | 1455.7106 | 13     | 1.2  | 728.8634 | 2 | 53.68 | 3        | F3:15808 | 17112021_RID_2349_DP3.raw |          |          |
| R.ERDLLNR.K           | N    | 42.02  | 914.4933  | 7      | -0.1 | 458.2539 | 2 | 23.23 | 1        | F1:6203  | 12112021_RID_2349_DP1.raw | 1.8049E7 | 3.2804E6 |
| Q.LNLTPEQR.T          | N    | 41.26  | 969.5243  | 8      | 0.0  | 485.7694 | 2 | 30.89 | 7        | F7:8269  | 17112021_RID_2349_DP7.raw | 4.4645E5 |          |
| D.NAQLLTGINFNGPSAGR.G | Y    | 40.64  | 1728.8907 | 17     | 0.3  | 865.4529 | 2 | 51.82 | 1        | F1:15761 | 12112021_RID_2349_DP1.raw | 1.7741E4 |          |

total 12

AAX38182.1

[back to list](#)

| [Protein Coverage](#) | [Supporting Peptides](#) |

Protein Coverage:

1

MMQVLLVTIC LAVFPYQGSS IILESGNVND YEYVYPQKIT ALPKGAIQQP EQKYEDAIFY EFKVNGKPVV LHLEKNKGLF

81

SEDYSETHYT PDGREITINP PVEDHCYYHG RIQNDADSTA SISACNGLKG HFKLQGEMYL IEPLRIPDSE AHAIYKYENI

161

EKEDAPKMC GVTQTNWESD EPIKASQLNL TPEQRTYLS KKYVELVIVA DYIMFWKYDR SLSTIRTRIY EIVNTLNVIY

241

RFLNIYIALV AVEIWSKGD L INVTSSAYDT LDSFGEWRER DLLNRK HDN AQLLTGINFN GPSAGRGFVG RMCQPKYSVG

321

IVQDHSKIYL LVSAMAHM GHNLGMDHDR IDCTCGAKSC MSGILRCET SYLFSDCSRE EHRKYLINKM PQCILNKPLK

401

TDIVSPAVCG NYFVEVGEEC DCGSPANCQD RCCDAATCKL RPGAQCGDGV CCYQCKFERR GTVCRPANGE CDVSDLCGTGQ

481

SAECTPDQFQ RNgQPCQNNK GYCYNGTCPI MEKQCISLFG ASATVAQDSC FQFNRRGNHY GYCRKENNTK IACAPEDVKC

561

GRLYCLDNSS GHKNPCQIYY IPSDENKGMV DPGTKCGDGM VCSNGKCVDV TIAY

Supporting Peptides:

| Peptide                 | Uniq | -10lgP | Mass      | Length | ppm  | m/z      | z | RT    | Fraction | Scan     | Source File               | Area F1  | Area F2  |
|-------------------------|------|--------|-----------|--------|------|----------|---|-------|----------|----------|---------------------------|----------|----------|
| R.IYEIVNTLNVIYR.F       | N    | 74.30  | 1608.8875 | 13     | 0.4  | 805.4514 | 2 | 61.67 | 3        | F3:18319 | 17112021_RID_2349_DP3.raw |          |          |
| R.HDNAQLLTGINFNGPSAGR.G | Y    | 73.01  | 1980.9766 | 19     | 0.3  | 991.4958 | 2 | 49.32 | 1        | F1:15000 | 12112021_RID_2349_DP1.raw | 2.0256E6 |          |
| K.YSVGIVQDHSK.I         | Y    | 72.55  | 1231.6196 | 11     | 0.5  | 616.8174 | 2 | 28.91 | 3        | F3:7512  | 17112021_RID_2349_DP3.raw | 3.3389E5 | 4.2446E5 |
| I.KASQLNLTPEQR.T        | N    | 68.58  | 1383.7469 | 12     | 0.5  | 692.8811 | 2 | 28.68 | 1        | F1:8063  | 12112021_RID_2349_DP1.raw | 1.981E6  | 1.3728E5 |
| A.SQLNLTPEQR.T          | N    | 61.22  | 1184.6150 | 10     | 0.3  | 593.3149 | 2 | 32.62 | 1        | F1:9376  | 12112021_RID_2349_DP1.raw | 1.0663E7 | 3.1363E6 |
| K.ASQLNLTPEQR.T         | N    | 61.13  | 1255.6521 | 11     | 0.9  | 628.8339 | 2 | 32.86 | 2        | F2:8565  | 12112021_RID_2349_DP2.raw | 5.7571E7 | 1.162E7  |
| D.SFGEWRER.D            | N    | 55.07  | 1065.4991 | 8      | 0.1  | 533.7569 | 2 | 31.26 | 2        | F2:7954  | 12112021_RID_2349_DP2.raw | 6.0265E6 | 2.4122E6 |
| D.TLDSFGEWR.E           | N    | 52.86  | 1109.5142 | 9      | 0.7  | 555.7648 | 2 | 47.54 | 2        | F2:13529 | 12112021_RID_2349_DP2.raw |          | 8.0796E4 |
| R.HDNAQLLTGINFN.G       | N    | 48.53  | 1455.7106 | 13     | 1.2  | 728.8634 | 2 | 53.68 | 3        | F3:15808 | 17112021_RID_2349_DP3.raw |          |          |
| R.ERDLLNR.K             | N    | 42.02  | 914.4933  | 7      | -0.1 | 458.2539 | 2 | 23.23 | 1        | F1:6203  | 12112021_RID_2349_DP1.raw | 1.8049E7 | 3.2804E6 |
| Q.LNLTPEQR.T            | N    | 41.26  | 969.5243  | 8      | 0.0  | 485.7694 | 2 | 30.89 | 7        | F7:8269  | 17112021_RID_2349_DP7.raw | 4.4645E5 |          |
| D.NAQLLTGINFNGPSAGR.G   | Y    | 40.64  | 1728.8907 | 17     | 0.3  | 865.4529 | 2 | 51.82 | 1        | F1:15761 | 12112021_RID_2349_DP1.raw | 1.7741E4 |          |

total 12

TRINITY\_DN459

[back to list](#)

| [Protein Coverage](#) | [Supporting Peptides](#) |

Protein Coverage:

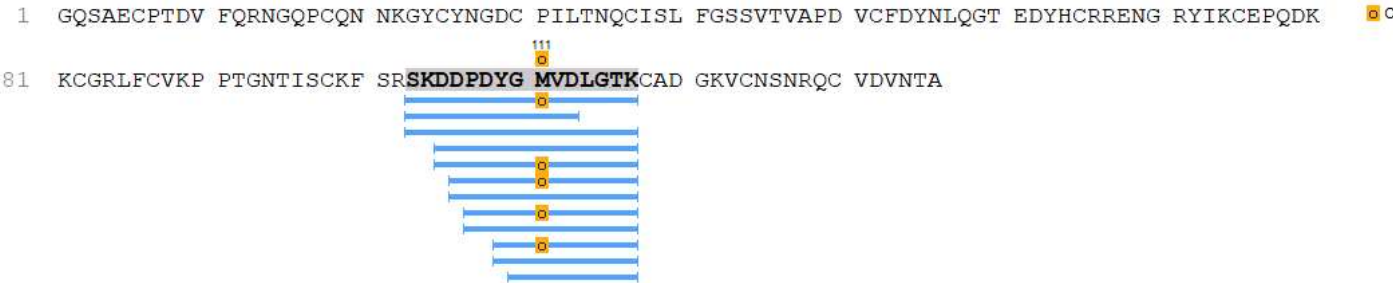

Supporting Peptides:

| Peptide                     | Uniq | -10lgP | Mass      | Length | ppm  | m/z      | z | RT    | Fraction | Scan     | Source File               | Area F1  | Area   |
|-----------------------------|------|--------|-----------|--------|------|----------|---|-------|----------|----------|---------------------------|----------|--------|
| R.SKDDPDYGM(+15.99)VDLGTK.C | Y    | 89.44  | 1655.7349 | 15     | 0.4  | 552.9191 | 3 | 38.10 | 1        | F1:11983 | 12112021_RID_2349_DP1.raw | 4.6116E7 | 1.206E |
| R.SKDDPDYGMVDLGTK.C         | Y    | 87.92  | 1639.7399 | 15     | -0.1 | 820.8771 | 2 | 39.20 | 3        | F3:10983 | 17112021_RID_2349_DP3.raw | 8.1952E7 | 2.556E |
| K.DDPDYGMVDLGTK.C           | N    | 86.80  | 1424.6129 | 13     | 0.9  | 713.3144 | 2 | 48.02 | 1        | F1:14542 | 12112021_RID_2349_DP1.raw | 3.1015E5 |        |
| D.PDYGMVDLGTK.C             | N    | 73.86  | 1194.5591 | 11     | -0.1 | 598.2867 | 2 | 43.94 | 1        | F1:13219 | 12112021_RID_2349_DP1.raw | 7.4048E6 | 4.196E |
| D.PDYGM(+15.99)VDLGTK.C     | N    | 71.86  | 1210.5540 | 11     | 0.4  | 606.2845 | 2 | 40.64 | 1        | F1:13230 | 12112021_RID_2349_DP1.raw | 6.7718E6 | 3.508E |
| K.DDPDYGM(+15.99)VDLGTK.C   | N    | 69.19  | 1440.6078 | 13     | 0.3  | 721.3114 | 2 | 40.35 | 6        | F6:11298 | 17112021_RID_2349_DP6.raw | 7.0367E4 |        |
| D.DPDYGMVDLGTK.C            | N    | 68.28  | 1309.5859 | 12     | 1.2  | 655.8010 | 2 | 47.41 | 1        | F1:14315 | 12112021_RID_2349_DP1.raw | 7.5385E5 |        |
| D.DPDYGM(+15.99)VDLGTK.C    | N    | 61.75  | 1325.5809 | 12     | 0.8  | 663.7983 | 2 | 39.96 | 1        | F1:11872 | 12112021_RID_2349_DP1.raw | 2.7576E5 |        |
| D.YGM(+15.99)VDLGTK.C       | N    | 54.16  | 998.4742  | 9      | 0.8  | 500.2448 | 2 | 39.32 | 1        | F1:11674 | 12112021_RID_2349_DP1.raw | 1.0157E5 |        |
| R.SKDDPDYGMVD.L             | Y    | 46.37  | 1240.4917 | 11     | 0.7  | 621.2535 | 2 | 34.22 | 1        | F1:10024 | 12112021_RID_2349_DP1.raw | 4.9296E5 |        |
| D.YGMVDLGTK.C               | N    | 45.13  | 982.4794  | 9      | -0.5 | 492.2467 | 2 | 39.32 | 1        | F1:11699 | 12112021_RID_2349_DP1.raw | 1.3963E5 |        |
| Y.GMVDLGTK.C                | N    | 44.20  | 819.4160  | 8      | 0.0  | 410.7153 | 2 | 30.74 | 7        | F7:8124  | 17112021_RID_2349_DP7.raw |          |        |

TRINITY\_DN1910  
[back to list](#)

[Protein Coverage](#) | [Supporting Peptides](#) |  
Protein Coverage:

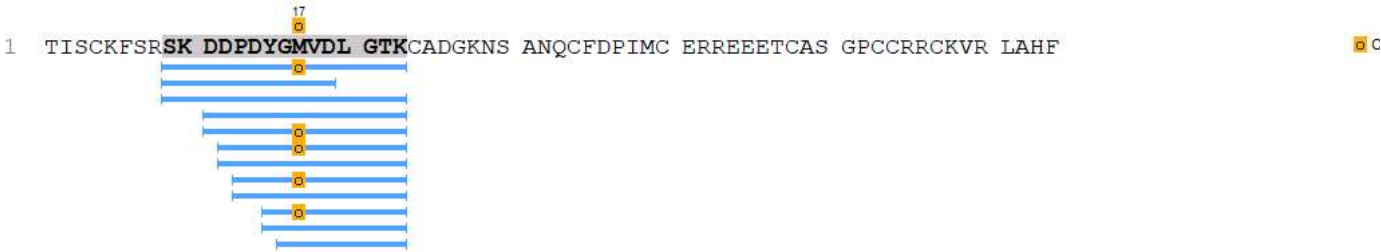

Supporting Peptides:

| Peptide                     | Uniq | -10lgP | Mass      | Length | ppm  | m/z      | z | RT    | Fraction | Scan     | Source File               | Area F1  | Area   |
|-----------------------------|------|--------|-----------|--------|------|----------|---|-------|----------|----------|---------------------------|----------|--------|
| R.SKDDPDYGM(+15.99)VDLGTK.C | Y    | 89.44  | 1655.7349 | 15     | 0.4  | 552.9191 | 3 | 38.10 | 1        | F1:11983 | 12112021_RID_2349_DP1.raw | 4.6116E7 | 1.206E |
| R.SKDDPDYGMVDLGTK.C         | Y    | 87.92  | 1639.7399 | 15     | -0.1 | 820.8771 | 2 | 39.20 | 3        | F3:10983 | 17112021_RID_2349_DP3.raw | 8.1952E7 | 2.556E |
| K.DDPDYGMVDLGTK.C           | N    | 86.80  | 1424.6129 | 13     | 0.9  | 713.3144 | 2 | 48.02 | 1        | F1:14542 | 12112021_RID_2349_DP1.raw | 3.1015E5 |        |
| D.PDYGMVDLGTK.C             | N    | 73.86  | 1194.5591 | 11     | -0.1 | 598.2867 | 2 | 43.94 | 1        | F1:13219 | 12112021_RID_2349_DP1.raw | 7.4048E6 | 4.196E |
| D.PDYGM(+15.99)VDLGTK.C     | N    | 71.86  | 1210.5540 | 11     | 0.4  | 606.2845 | 2 | 40.64 | 1        | F1:13230 | 12112021_RID_2349_DP1.raw | 6.7718E6 | 3.508E |
| K.DDPDYGM(+15.99)VDLGTK.C   | N    | 69.19  | 1440.6078 | 13     | 0.3  | 721.3114 | 2 | 40.35 | 6        | F6:11298 | 17112021_RID_2349_DP6.raw | 7.0367E4 |        |
| D.DPDYGMVDLGTK.C            | N    | 68.28  | 1309.5859 | 12     | 1.2  | 655.8010 | 2 | 47.41 | 1        | F1:14315 | 12112021_RID_2349_DP1.raw | 7.5385E5 |        |
| D.DPDYGM(+15.99)VDLGTK.C    | N    | 61.75  | 1325.5809 | 12     | 0.8  | 663.7983 | 2 | 39.96 | 1        | F1:11872 | 12112021_RID_2349_DP1.raw | 2.7576E5 |        |
| D.YGM(+15.99)VDLGTK.C       | N    | 54.16  | 998.4742  | 9      | 0.8  | 500.2448 | 2 | 39.32 | 1        | F1:11674 | 12112021_RID_2349_DP1.raw | 1.0157E5 |        |
| R.SKDDPDYGMVD.L             | Y    | 46.37  | 1240.4917 | 11     | 0.7  | 621.2535 | 2 | 34.22 | 1        | F1:10024 | 12112021_RID_2349_DP1.raw | 4.9296E5 |        |

| Peptide       | Uniq | -10lgP | Mass     | Length | ppm  | m/z      | z | RT    | Fraction | Scan     | Source File               | Area F1  | Area |
|---------------|------|--------|----------|--------|------|----------|---|-------|----------|----------|---------------------------|----------|------|
| D.YGMVDLGTK.C | N    | 45.13  | 982.4794 | 9      | -0.5 | 492.2467 | 2 | 39.32 | 1        | F1:11699 | 12112021_RID_2349_DP1.raw | 1.3963E5 |      |
| Y.GMVDLGTK.C  | N    | 44.20  | 819.4160 | 8      | 0.0  | 410.7153 | 2 | 30.74 | 7        | F7:8124  | 17112021_RID_2349_DP7.raw |          |      |

TRINITY\_DN509  
[back to list](#)

| [Protein Coverage](#) | [Supporting Peptides](#) |  
Protein Coverage:

|     |            |            |            |            |            |            |            |            |            |            |        |         |
|-----|------------|------------|------------|------------|------------|------------|------------|------------|------------|------------|--------|---------|
| 1   | MKYAIVCLLL | VGSVFAAEDD | DKKEDVGT   | TVV        | GIDLGTTYSC | VG         | VFKNGR     | VE         | IIANDQGNRI | TPSYVAFTPE | GER    | LIGDAAK |
| 81  | NQLTSNPENT | VFDAK      | RLIGR      | TWNDPSVQQD | IK         | YLPFKVIE   | KTK        | KPYIQVD    | VGGGQTKTFA | PEEISAMVLT | KMKETA | EAYL    |
| 161 | GKKVTHAVVT | VPAYFNDAQR | QATKDAGTIA | GLNVMRIINE | PTAAAIAYGL | DKREGEKNIL | VFDLGGGT   | TFD        | VSLLTIDNGV |            |        |         |
| 241 | FEVVATNGDT | HLGGEDFDQR | VMEHFIKLYK | KKTGKDVRKD | NRAVQKLRR  | VEKAKRALSS | QH         | QARIEIES   | FFEGEDFSET |            |        |         |
| 321 | LTRAKFEELN | MDLFRSTMKP | VQKVLEDADL | KKPDIDEIVL | VGGSTRIPKI | QQLVKEFFNG | KEPSRGINPD | EAVAYGAAVQ |            |            |        |         |
| 401 | AGVLSGDQDT | GDLVLLDVCP | LTLGIETVGG | VMTKLIPRNT | VVPTKK     | SQIF       | STASDNQPTV | TIKVYEGERP | LTK        | DNHLLGT    |        |         |
| 481 | FDLTGIPPAP | RGVPQIEVTF | EIDVNGILRV | TAEDKGTGNK | NKITITNDQN | RLTPEEIERM | VNDAEKFAEE | DKKLKERIDA |            |            |        |         |
| 561 | RNELESYAYS | LK         | NQIGDKEK   | LGGKLSTEDK | ETIEKAVEEK | IEWLESHQEA | DIEDFKAQKK | ELEE       | VVQPIV     | GKLYGGAGPP |        |         |
| 641 | PGGE       | EPGEKD     | EL         |            |            |            |            |            |            |            |        |         |

Supporting Peptides:

| Peptide               | Uniq | -10lgP | Mass      | Length | ppm  | m/z      | z | RT    | Fraction | Scan     | Source File               | Area F1  | Area F2 | Area F3 |
|-----------------------|------|--------|-----------|--------|------|----------|---|-------|----------|----------|---------------------------|----------|---------|---------|
| K.SQIFSTASDNQPTVTIK.V | Y    | 78.43  | 1835.9265 | 17     | 0.7  | 918.9712 | 2 | 43.86 | 4        | F4:12557 | 17112021_RID_2349_DP4.raw |          |         |         |
| K.ELEE                | Y    | 68.74  | 1338.7394 | 12     | 0.1  | 670.3770 | 2 | 46.15 | 4        | F4:13270 | 17112021_RID_2349_DP4.raw |          |         |         |
| R.NELESYAYSLK.N       | Y    | 67.75  | 1315.6295 | 11     | 0.6  | 658.8224 | 2 | 45.74 | 4        | F4:13114 | 17112021_RID_2349_DP4.raw |          |         |         |
| R.ITPSYVAFTPEGER.L    | Y    | 63.57  | 1565.7725 | 14     | 0.5  | 783.8939 | 2 | 46.47 | 2        | F2:13149 | 12112021_RID_2349_DP2.raw | 8.8984E4 |         |         |
| K.VYEGERPLTK.D        | Y    | 55.73  | 1190.6295 | 10     | 0.6  | 596.3224 | 2 | 22.63 | 4        | F4:5257  | 17112021_RID_2349_DP4.raw |          |         |         |
| R.LTPEEIER.M          | Y    | 49.69  | 985.5080  | 8      | -0.1 | 493.7612 | 2 | 31.13 | 4        | F4:8215  | 17112021_RID_2349_DP4.raw |          |         |         |
| K.NQLTSNPENTVFDAK.R   | Y    | 48.37  | 1676.8005 | 15     | 1.1  | 839.4084 | 2 | 40.91 | 2        | F2:11316 | 12112021_RID_2349_DP2.raw | 1.9104E4 |         |         |
| K.LYGGAGPPPGGE        | Y    | 45.98  | 1967.9111 | 20     | 0.8  | 984.9636 | 2 | 40.85 | 4        | F4:11534 | 17112021_RID_2349_DP4.raw |          |         |         |
| R.TWNDPSVQQDIK.Y      | Y    | 45.02  | 1429.6837 | 12     | 0.3  | 715.8494 | 2 | 37.71 | 2        | F2:10252 | 12112021_RID_2349_DP2.raw | 2.2693E4 |         |         |
| K.LYGGAGPPPGGE        | Y    | 42.79  | 1854.8271 | 19     | 1.1  | 928.4219 | 2 | 33.35 | 4        | F4:8886  | 17112021_RID_2349_DP4.raw |          |         |         |
| K.LYGGAGPPPGGE        | Y    | 38.90  | 1610.7576 | 17     | 0.9  | 806.3868 | 2 | 31.58 | 4        | F4:8348  | 17112021_RID_2349_DP4.raw |          |         |         |

total 11 peptide

TRINITY\_DN509  
[back to list](#)

| [Protein Coverage](#) | [Supporting Peptides](#) |  
Protein Coverage:

|     |            |            |            |            |            |            |            |            |            |            |            |            |            |
|-----|------------|------------|------------|------------|------------|------------|------------|------------|------------|------------|------------|------------|------------|
| 1   | P          | REAAGGYIS  | ADGRPGLNTR | SGETSAWEGS | ERRSAAAGSP | SRRDRVLLLV | WCVREHPPSK | SNMKYAIVCL | LLVGSVFAAE |            |            |            |            |
| 81  | DDDKEDVGT  | VVGIDLGTTY | SCVGVFKNGR | VEIIANDQGN | RITPSYVAFT | PEGER      | LIGDA      | AK         | NQLTSNPE   | NTVFDAK    | RLI        |            |            |
| 161 | GR         | TWNDPSVQ   | QDIK       | YLPFKV     | IEK        | KTKPYIQ    | VDVGGGQTKT | FAPEEISAMV | LTKMKETA   | EAYL       | YLGKKVTHAV | VTVPAYFNDA |            |
| 241 | QRQATKDAGT | IAGLNVMRII | NEPTAAAIAY | GLDKREGEKN | ILVFDLGGGT | FDVSLLTIDN | GVFEVVATNG | DTHLGGEDFD |            |            |            |            |            |
| 321 | Q          | RVMEHF     | IKL        | YKKKTGKDVR | KDNRAVQKL  | R          | VEKAKRAL   | SSQH       | QARIEI     | ESFFEGEDFS | ETL        | TRAKFEE    | LNMDLFRSTM |
| 401 | KPVQKVLEDA | DLKKPDIDEI | VLVGGSTRIP | KIQQLVKEFF | NGKEPSRGIN | PDEAVAYGAA | VQAGVLSGDQ | DTGDLVLLDV |            |            |            |            |            |
| 481 | CPLTLGIETV | GGVMTKLIPR | NTVVPTKK   | SQ         | IFSTASDNQP | TVT        | IKVYEGER   | RPLTK      | DNHLL      | GT         | FDLTGIPP   | APRGVPQIEV |            |
| 561 | TFEIDVNGIL | RVTAEDKGTG | NKNKITITND | QNR        | LTPEEIE    | RMVNDAEKFA | EEDKKLKERI | DAR        | NELESYA    | YSLK       | NQIGDK     |            |            |
| 641 | EKLGGKLSTE | DKETIEKAVE | EKIEWLESHQ | EADIEDFKAQ | KK         | ELEE       | VVQPIV     | IVGKLYGGAG | PPPGGE     | EPGE       | KDEL       |            |            |

Supporting Peptides:

8/2/22, 12:12 PM

proteins

| Peptide                 | Uniq | -10lgP | Mass      | Length | ppm  | m/z      | z | RT    | Fraction | Scan     | Source File               | Area F1  | Area F2 | Area F3 |
|-------------------------|------|--------|-----------|--------|------|----------|---|-------|----------|----------|---------------------------|----------|---------|---------|
| K.SQIFSTASDNQPTVTIK.V   | Y    | 78.43  | 1835.9265 | 17     | 0.7  | 918.9712 | 2 | 43.86 | 4        | F4:12557 | 17112021_RID_2349_DP4.raw |          |         |         |
| K.ELEEVVQPIVGK.L        | Y    | 68.74  | 1338.7394 | 12     | 0.1  | 670.3770 | 2 | 46.15 | 4        | F4:13270 | 17112021_RID_2349_DP4.raw |          |         |         |
| R.NELESYAYSLK.N         | Y    | 67.75  | 1315.6295 | 11     | 0.6  | 658.8224 | 2 | 45.74 | 4        | F4:13114 | 17112021_RID_2349_DP4.raw |          |         |         |
| R.ITPSYVAFTPEGER.L      | Y    | 63.57  | 1565.7725 | 14     | 0.5  | 783.8939 | 2 | 46.47 | 2        | F2:13149 | 12112021_RID_2349_DP2.raw | 8.8984E4 |         |         |
| K.VYEGERPLTK.D          | Y    | 55.73  | 1190.6295 | 10     | 0.6  | 596.3224 | 2 | 22.63 | 4        | F4:5257  | 17112021_RID_2349_DP4.raw |          |         |         |
| R.LTPEEIER.M            | Y    | 49.69  | 985.5080  | 8      | -0.1 | 493.7612 | 2 | 31.13 | 4        | F4:8215  | 17112021_RID_2349_DP4.raw |          |         |         |
| K.NQLTSNPENTVFDAK.R     | Y    | 48.37  | 1676.8005 | 15     | 1.1  | 839.4084 | 2 | 40.91 | 2        | F2:11316 | 12112021_RID_2349_DP2.raw | 1.9104E4 |         |         |
| K.LYGGAGPPPGGEEPGEKDEL  | Y    | 45.98  | 1967.9111 | 20     | 0.8  | 984.9636 | 2 | 40.85 | 4        | F4:11534 | 17112021_RID_2349_DP4.raw |          |         |         |
| R.TWNDSVQQDIK.Y         | Y    | 45.02  | 1429.6837 | 12     | 0.3  | 715.8494 | 2 | 37.71 | 2        | F2:10252 | 12112021_RID_2349_DP2.raw | 2.2693E4 |         |         |
| K.LYGGAGPPPGGEEPGEKDE.L | Y    | 42.79  | 1854.8271 | 19     | 1.1  | 928.4219 | 2 | 33.35 | 4        | F4:8886  | 17112021_RID_2349_DP4.raw |          |         |         |
| K.LYGGAGPPPGGEEPGEK.D   | Y    | 38.90  | 1610.7576 | 17     | 0.9  | 806.3868 | 2 | 31.58 | 4        | F4:8348  | 17112021_RID_2349_DP4.raw |          |         |         |
| total 11 peptide        |      |        |           |        |      |          |   |       |          |          |                           |          |         |         |

ADK22823.1  
[back to list](#)

[Protein Coverage](#) | [Supporting Peptides](#) |  
Protein Coverage:

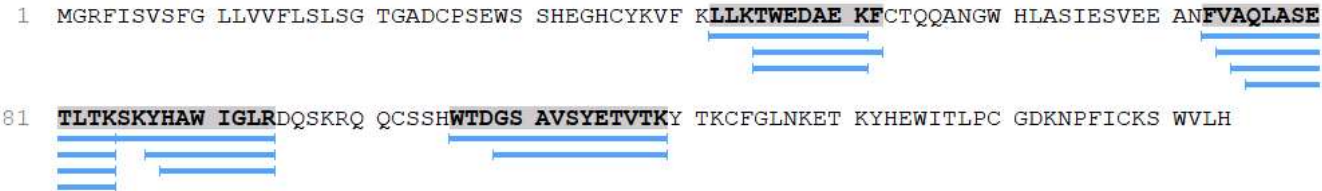

Supporting Peptides:

| Peptide            | Uniq | -10lgP | Mass      | Length | ppm  | m/z      | z | RT    | Fraction | Scan     | Source File               | Area F1 | Area F2 | Area F3 | Area F4 | Area F5 |
|--------------------|------|--------|-----------|--------|------|----------|---|-------|----------|----------|---------------------------|---------|---------|---------|---------|---------|
| K.LLLKTWEDAELK.F   | N    | 73.82  | 1231.6448 | 10     | 0.3  | 616.8298 | 2 | 32.46 | 7        | F7:8767  | 17112021_RID_2349_DP7.raw |         |         |         |         |         |
| F.VAQLASETLTK.S    | Y    | 64.28  | 1159.6448 | 11     | 0.4  | 580.8299 | 2 | 32.58 | 7        | F7:8832  | 17112021_RID_2349_DP7.raw |         |         |         |         |         |
| N.FVAQLASETLTK.S   | Y    | 63.48  | 1306.7133 | 12     | 0.5  | 654.3643 | 2 | 44.09 | 7        | F7:12823 | 17112021_RID_2349_DP7.raw |         |         |         |         |         |
| K.YHAWIGLR.D       | N    | 61.14  | 1014.5399 | 8      | -0.1 | 508.2772 | 2 | 40.32 | 7        | F7:11939 | 17112021_RID_2349_DP7.raw |         |         |         |         | 3.38    |
| D.GSAVSYETVTK.Y    | N    | 57.05  | 1140.5663 | 11     | 0.1  | 571.2905 | 2 | 28.66 | 6        | F6:7260  | 17112021_RID_2349_DP6.raw |         |         |         |         |         |
| V.AQLASETLTK.S     | Y    | 56.80  | 1060.5764 | 10     | 0.2  | 531.2956 | 2 | 28.42 | 7        | F7:7389  | 17112021_RID_2349_DP7.raw |         |         |         |         |         |
| K.SKYHAWIGLR.D     | N    | 51.39  | 1229.6669 | 10     | 0.3  | 615.8409 | 2 | 41.34 | 7        | F7:11753 | 17112021_RID_2349_DP7.raw |         |         |         |         |         |
| Y.HAWIGLR.D        | N    | 46.00  | 851.4766  | 7      | 0.5  | 426.7458 | 2 | 35.11 | 7        | F7:9748  | 17112021_RID_2349_DP7.raw |         |         |         |         |         |
| H.WTDGSAVSYETVTK.Y | N    | 45.93  | 1542.7202 | 14     | 0.5  | 772.3678 | 2 | 39.78 | 6        | F6:11115 | 17112021_RID_2349_DP6.raw |         |         |         |         |         |
| A.QLASETLTK.S      | Y    | 44.28  | 989.5393  | 9      | -0.3 | 495.7768 | 2 | 26.35 | 7        | F7:6702  | 17112021_RID_2349_DP7.raw |         |         |         |         |         |
| K.TWEDAELK.F       | N    | 42.92  | 877.3817  | 7      | 0.0  | 439.6982 | 2 | 23.16 | 7        | F7:5532  | 17112021_RID_2349_DP7.raw |         |         |         |         |         |
| K.TWEDAELK.F       | N    | 40.38  | 1024.4502 | 8      | -0.9 | 513.2319 | 2 | 40.86 | 7        | F7:11654 | 17112021_RID_2349_DP7.raw |         |         |         |         |         |
| total 12 peptides  |      |        |           |        |      |          |   |       |          |          |                           |         |         |         |         |         |

ABA86561.1  
[back to list](#)

[Protein Coverage](#) | [Supporting Peptides](#) |  
Protein Coverage:

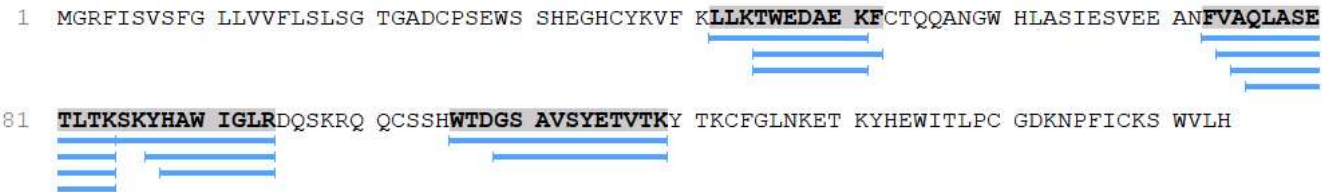

Supporting Peptides:

| Peptide            | Uniq | -10lgP | Mass      | Length | ppm  | m/z      | z | RT    | Fraction | Scan     | Source File               | Area F1 | Area F2 | Area F3 | Area F4 | At F |
|--------------------|------|--------|-----------|--------|------|----------|---|-------|----------|----------|---------------------------|---------|---------|---------|---------|------|
| K.LLKTWEDAЕК.F     | N    | 73.82  | 1231.6448 | 10     | 0.3  | 616.8298 | 2 | 32.46 | 7        | F7:8767  | 17112021_RID_2349_DP7.raw |         |         |         |         |      |
| F.VAQLASETLTK.S    | Y    | 64.28  | 1159.6448 | 11     | 0.4  | 580.8299 | 2 | 32.58 | 7        | F7:8832  | 17112021_RID_2349_DP7.raw |         |         |         |         |      |
| N.FVAQLASETLTK.S   | Y    | 63.48  | 1306.7133 | 12     | 0.5  | 654.3643 | 2 | 44.09 | 7        | F7:12823 | 17112021_RID_2349_DP7.raw |         |         |         |         |      |
| K.YHAWIGLR.D       | N    | 61.14  | 1014.5399 | 8      | -0.1 | 508.2772 | 2 | 40.32 | 7        | F7:11939 | 17112021_RID_2349_DP7.raw |         |         |         |         | 3.38 |
| D.GSAVSYETVTK.Y    | N    | 57.05  | 1140.5663 | 11     | 0.1  | 571.2905 | 2 | 28.66 | 6        | F6:7260  | 17112021_RID_2349_DP6.raw |         |         |         |         |      |
| V.AQLASETLTK.S     | Y    | 56.80  | 1060.5764 | 10     | 0.2  | 531.2956 | 2 | 28.42 | 7        | F7:7389  | 17112021_RID_2349_DP7.raw |         |         |         |         |      |
| K.SKYHAWIGLR.D     | N    | 51.39  | 1229.6669 | 10     | 0.3  | 615.8409 | 2 | 41.34 | 7        | F7:11753 | 17112021_RID_2349_DP7.raw |         |         |         |         |      |
| Y.HAWIGLR.D        | N    | 46.00  | 851.4766  | 7      | 0.5  | 426.7458 | 2 | 35.11 | 7        | F7:9748  | 17112021_RID_2349_DP7.raw |         |         |         |         |      |
| H.WTDGSAVSYETVTK.Y | N    | 45.93  | 1542.7202 | 14     | 0.5  | 772.3678 | 2 | 39.78 | 6        | F6:11115 | 17112021_RID_2349_DP6.raw |         |         |         |         |      |
| A.QLASETLTK.S      | Y    | 44.28  | 989.5393  | 9      | -0.3 | 495.7768 | 2 | 26.35 | 7        | F7:6702  | 17112021_RID_2349_DP7.raw |         |         |         |         |      |
| K.TWEDAЕК.F        | N    | 42.92  | 877.3817  | 7      | 0.0  | 439.6982 | 2 | 23.16 | 7        | F7:5532  | 17112021_RID_2349_DP7.raw |         |         |         |         |      |
| K.TWEDAЕК.F.C      | N    | 40.38  | 1024.4502 | 8      | -0.9 | 513.2319 | 2 | 40.86 | 7        | F7:11654 | 17112021_RID_2349_DP7.raw |         |         |         |         |      |
| total 12 peptides  |      |        |           |        |      |          |   |       |          |          |                           |         |         |         |         |      |

Q38L02.1

[back to list](#)

[Protein Coverage](#) | [Supporting Peptides](#) |

Protein Coverage:

1

MGRFISVSFG LLVVFLSLSG TGADCPSEWS SHEGHСYKVF KLLKTWEDAЕК KECTQQANGW HLASIESVEE ANFVAQLASE

81

TLTKSKYHAW IGLRDQSKRQ QCSSHWTDGS AVSYETVTKY TKCFGLNKET KYHEWITLPC GDKNPFICKS WVLH

Supporting Peptides:

| Peptide            | Uniq | -10lgP | Mass      | Length | ppm  | m/z      | z | RT    | Fraction | Scan     | Source File               | Area F1 | Area F2 | Area F3 | Area F4 | At F |
|--------------------|------|--------|-----------|--------|------|----------|---|-------|----------|----------|---------------------------|---------|---------|---------|---------|------|
| K.LLKTWEDAЕК.F     | N    | 73.82  | 1231.6448 | 10     | 0.3  | 616.8298 | 2 | 32.46 | 7        | F7:8767  | 17112021_RID_2349_DP7.raw |         |         |         |         |      |
| F.VAQLASETLTK.S    | Y    | 64.28  | 1159.6448 | 11     | 0.4  | 580.8299 | 2 | 32.58 | 7        | F7:8832  | 17112021_RID_2349_DP7.raw |         |         |         |         |      |
| N.FVAQLASETLTK.S   | Y    | 63.48  | 1306.7133 | 12     | 0.5  | 654.3643 | 2 | 44.09 | 7        | F7:12823 | 17112021_RID_2349_DP7.raw |         |         |         |         |      |
| K.YHAWIGLR.D       | N    | 61.14  | 1014.5399 | 8      | -0.1 | 508.2772 | 2 | 40.32 | 7        | F7:11939 | 17112021_RID_2349_DP7.raw |         |         |         |         | 3.38 |
| D.GSAVSYETVTK.Y    | N    | 57.05  | 1140.5663 | 11     | 0.1  | 571.2905 | 2 | 28.66 | 6        | F6:7260  | 17112021_RID_2349_DP6.raw |         |         |         |         |      |
| V.AQLASETLTK.S     | Y    | 56.80  | 1060.5764 | 10     | 0.2  | 531.2956 | 2 | 28.42 | 7        | F7:7389  | 17112021_RID_2349_DP7.raw |         |         |         |         |      |
| K.SKYHAWIGLR.D     | N    | 51.39  | 1229.6669 | 10     | 0.3  | 615.8409 | 2 | 41.34 | 7        | F7:11753 | 17112021_RID_2349_DP7.raw |         |         |         |         |      |
| Y.HAWIGLR.D        | N    | 46.00  | 851.4766  | 7      | 0.5  | 426.7458 | 2 | 35.11 | 7        | F7:9748  | 17112021_RID_2349_DP7.raw |         |         |         |         |      |
| H.WTDGSAVSYETVTK.Y | N    | 45.93  | 1542.7202 | 14     | 0.5  | 772.3678 | 2 | 39.78 | 6        | F6:11115 | 17112021_RID_2349_DP6.raw |         |         |         |         |      |
| A.QLASETLTK.S      | Y    | 44.28  | 989.5393  | 9      | -0.3 | 495.7768 | 2 | 26.35 | 7        | F7:6702  | 17112021_RID_2349_DP7.raw |         |         |         |         |      |
| K.TWEDAЕК.F        | N    | 42.92  | 877.3817  | 7      | 0.0  | 439.6982 | 2 | 23.16 | 7        | F7:5532  | 17112021_RID_2349_DP7.raw |         |         |         |         |      |
| K.TWEDAЕК.F.C      | N    | 40.38  | 1024.4502 | 8      | -0.9 | 513.2319 | 2 | 40.86 | 7        | F7:11654 | 17112021_RID_2349_DP7.raw |         |         |         |         |      |
| total 12 peptides  |      |        |           |        |      |          |   |       |          |          |                           |         |         |         |         |      |

ADK22821.1

[back to list](#)

[Protein Coverage](#) | [Supporting Peptides](#) |

Protein Coverage:

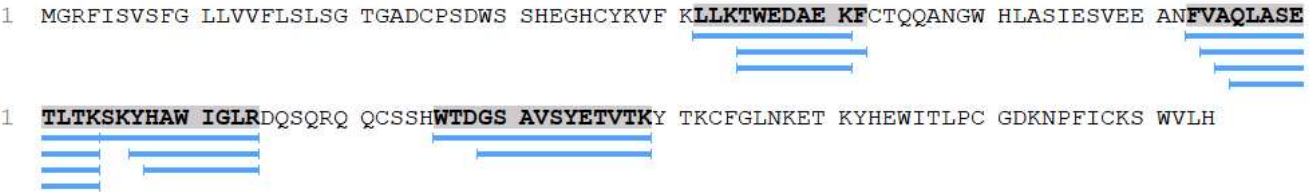

Supporting Peptides:

| Peptide             | Uniq | -10lgP | Mass      | Length | ppm  | m/z      | z | RT    | Fraction | Scan     | Source File               | Area F1 | Area F2 | Area F3 | Area F4 | Area F5 |
|---------------------|------|--------|-----------|--------|------|----------|---|-------|----------|----------|---------------------------|---------|---------|---------|---------|---------|
| K.LLKTWEDA.EK.F     | N    | 73.82  | 1231.6448 | 10     | 0.3  | 616.8298 | 2 | 32.46 | 7        | F7:8767  | 17112021_RID_2349_DP7.raw |         |         |         |         |         |
| F.VAQLASETLTK.S     | Y    | 64.28  | 1159.6448 | 11     | 0.4  | 580.8299 | 2 | 32.58 | 7        | F7:8832  | 17112021_RID_2349_DP7.raw |         |         |         |         |         |
| N.FVAQLASETLTK.S    | Y    | 63.48  | 1306.7133 | 12     | 0.5  | 654.3643 | 2 | 44.09 | 7        | F7:12823 | 17112021_RID_2349_DP7.raw |         |         |         |         |         |
| K.YHAWIGLR.D        | N    | 61.14  | 1014.5399 | 8      | -0.1 | 508.2772 | 2 | 40.32 | 7        | F7:11939 | 17112021_RID_2349_DP7.raw |         |         |         |         | 3.38    |
| D.GSAVS.YETVTK.Y    | N    | 57.05  | 1140.5663 | 11     | 0.1  | 571.2905 | 2 | 28.66 | 6        | F6:7260  | 17112021_RID_2349_DP6.raw |         |         |         |         |         |
| V.AQLASETLTK.S      | Y    | 56.80  | 1060.5764 | 10     | 0.2  | 531.2956 | 2 | 28.42 | 7        | F7:7389  | 17112021_RID_2349_DP7.raw |         |         |         |         |         |
| K.SKYHAWIGLR.D      | N    | 51.39  | 1229.6669 | 10     | 0.3  | 615.8409 | 2 | 41.34 | 7        | F7:11753 | 17112021_RID_2349_DP7.raw |         |         |         |         |         |
| Y.HAWIGLR.D         | N    | 46.00  | 851.4766  | 7      | 0.5  | 426.7458 | 2 | 35.11 | 7        | F7:9748  | 17112021_RID_2349_DP7.raw |         |         |         |         |         |
| H.WTDGSAVS.YETVTK.Y | N    | 45.93  | 1542.7202 | 14     | 0.5  | 772.3678 | 2 | 39.78 | 6        | F6:11115 | 17112021_RID_2349_DP6.raw |         |         |         |         |         |
| A.QLASETLTK.S       | Y    | 44.28  | 989.5393  | 9      | -0.3 | 495.7768 | 2 | 26.35 | 7        | F7:6702  | 17112021_RID_2349_DP7.raw |         |         |         |         |         |
| K.TWEDA.EK.F        | N    | 42.92  | 877.3817  | 7      | 0.0  | 439.6982 | 2 | 23.16 | 7        | F7:5532  | 17112021_RID_2349_DP7.raw |         |         |         |         |         |
| K.TWEDA.EK.F.C      | N    | 40.38  | 1024.4502 | 8      | -0.9 | 513.2319 | 2 | 40.86 | 7        | F7:11654 | 17112021_RID_2349_DP7.raw |         |         |         |         |         |

total 12 peptides

AAZ53176.1  
[back to list](#)

[Protein Coverage](#) | [Supporting Peptides](#) |  
Protein Coverage:

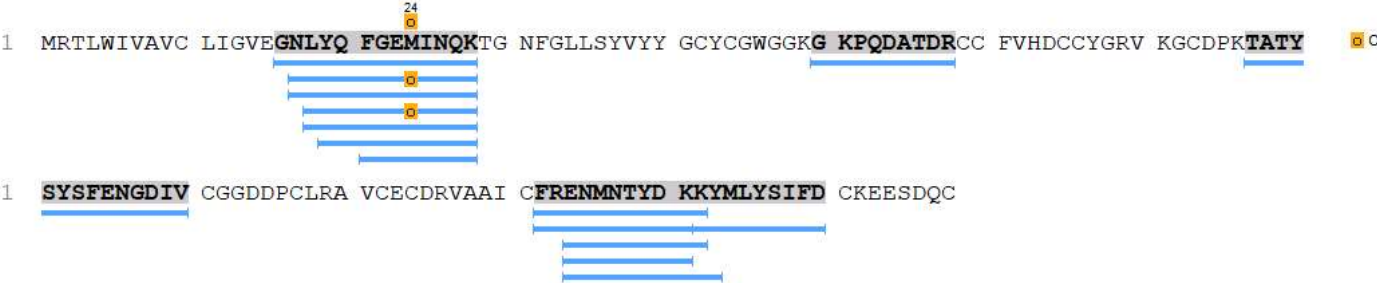

Supporting Peptides:

| Peptide                  | Uniq | -10lgP | Mass      | Length | ppm  | m/z      | z | RT    | Fraction | Scan     | Source File               | Area F1  | Area F2  | Area F3 | Area F4 | Area F5 |
|--------------------------|------|--------|-----------|--------|------|----------|---|-------|----------|----------|---------------------------|----------|----------|---------|---------|---------|
| G.NLYQFGEM(+15.99)INQK.T | Y    | 70.27  | 1499.7079 | 12     | -0.1 | 750.8611 | 2 | 48.50 | 7        | F7:14280 | 17112021_RID_2349_DP7.raw | 1.5509E5 | 5.2464E4 | 2.1     |         |         |
| G.NLYQFGEMINQK.T         | Y    | 69.45  | 1483.7129 | 12     | 0.2  | 742.8639 | 2 | 50.67 | 7        | F7:15227 | 17112021_RID_2349_DP7.raw | 4.284E5  |          |         |         | 1.0     |
| N.LYQFGEM(+15.99)INQK.T  | Y    | 66.62  | 1385.6649 | 11     | 0.4  | 693.8400 | 2 | 39.94 | 7        | F7:11327 | 17112021_RID_2349_DP7.raw |          |          |         |         |         |
| N.LYQFGEMINQK.T          | Y    | 66.11  | 1369.6700 | 11     | 0.2  | 685.8424 | 2 | 47.17 | 7        | F7:13715 | 17112021_RID_2349_DP7.raw |          |          |         |         |         |
| E.GNLYQFGEMINQK.T        | Y    | 61.39  | 1540.7344 | 13     | 0.5  | 771.3749 | 2 | 54.08 | 7        | F7:16198 | 17112021_RID_2349_DP7.raw |          |          |         |         |         |
| L.YQFGEMINQK.T           | Y    | 61.03  | 1256.5859 | 10     | 0.0  | 629.3002 | 2 | 42.06 | 7        | F7:12071 | 17112021_RID_2349_DP7.raw |          |          |         |         |         |
| K.TATYSYSFENGDIV.C       | Y    | 54.07  | 1565.6885 | 14     | 0.6  | 783.8520 | 2 | 57.78 | 7        | F7:17385 | 17112021_RID_2349_DP7.raw |          |          |         |         |         |
| R.ENMNTYDK.K             | N    | 52.21  | 1013.4124 | 8      | 0.7  | 507.7138 | 2 | 19.60 | 7        | F7:4282  | 17112021_RID_2349_DP7.raw |          |          |         |         |         |
| K.GKPQDATDR.C            | N    | 48.61  | 986.4781  | 9      | -0.5 | 494.2461 | 2 | 11.50 | 7        | F7:1839  | 17112021_RID_2349_DP7.raw |          |          |         |         |         |
| C.FRENMNTYDKK.Y          | Y    | 45.46  | 1444.6769 | 11     | -0.4 | 482.5660 | 3 | 21.59 | 7        | F7:4995  | 17112021_RID_2349_DP7.raw |          |          |         |         |         |
| R.ENMNTYDKK.Y            | N    | 43.49  | 1141.5073 | 9      | -0.1 | 571.7609 | 2 | 15.11 | 7        | F7:2868  | 17112021_RID_2349_DP7.raw |          |          |         |         |         |

tota

| Peptide        | Uniq | -10lgP | Mass      | Length | ppm  | m/z      | z | RT    | Fraction | Scan     | Source File               | Area F1 | Area F2 | A |
|----------------|------|--------|-----------|--------|------|----------|---|-------|----------|----------|---------------------------|---------|---------|---|
| K.KYMLYSIFD.C  | N    | 43.04  | 1178.5681 | 9      | 0.2  | 590.2914 | 2 | 60.72 | 7        | F7:18383 | 17112021_RID_2349_DP7.raw |         |         |   |
| R.ENMNTYDKKY.M | Y    | 42.65  | 1304.5707 | 10     | -0.7 | 653.2922 | 2 | 23.23 | 7        | F7:5555  | 17112021_RID_2349_DP7.raw |         |         |   |
| Q.FGEMINQK.T   | Y    | 39.53  | 965.4641  | 8      | -0.3 | 483.7391 | 2 | 31.06 | 7        | F7:8248  | 17112021_RID_2349_DP7.raw |         |         |   |
| C.FRENMNTYDK.K | Y    | 39.33  | 1316.5819 | 10     | 0.4  | 659.2985 | 2 | 24.51 | 7        | F7:6037  | 17112021_RID_2349_DP7.raw |         |         |   |

tota

A8CG78.1  
[back to list](#)

| [Protein Coverage](#) | [Supporting Peptides](#) |  
Protein Coverage:

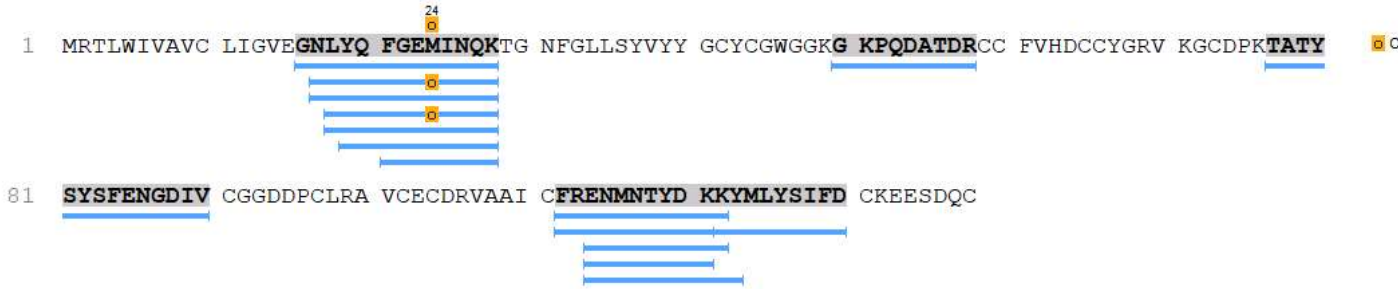

Supporting Peptides:

| Peptide                  | Uniq | -10lgP | Mass      | Length | ppm  | m/z      | z | RT    | Fraction | Scan     | Source File               | Area F1  | Area F2  | A   |
|--------------------------|------|--------|-----------|--------|------|----------|---|-------|----------|----------|---------------------------|----------|----------|-----|
| G.NLYQFGEM(+15.99)INQK.T | Y    | 70.27  | 1499.7079 | 12     | -0.1 | 750.8611 | 2 | 48.50 | 7        | F7:14280 | 17112021_RID_2349_DP7.raw | 1.5509E5 | 5.2464E4 | 2.1 |
| G.NLYQFGEMINQK.T         | Y    | 69.45  | 1483.7129 | 12     | 0.2  | 742.8639 | 2 | 50.67 | 7        | F7:15227 | 17112021_RID_2349_DP7.raw | 4.284E5  |          | 1.0 |
| N.LYQFGEM(+15.99)INQK.T  | Y    | 66.62  | 1385.6649 | 11     | 0.4  | 693.8400 | 2 | 39.94 | 7        | F7:11327 | 17112021_RID_2349_DP7.raw |          |          |     |
| N.LYQFGEMINQK.T          | Y    | 66.11  | 1369.6700 | 11     | 0.2  | 685.8424 | 2 | 47.17 | 7        | F7:13715 | 17112021_RID_2349_DP7.raw |          |          |     |
| E.GNLYQFGEMINQK.T        | Y    | 61.39  | 1540.7344 | 13     | 0.5  | 771.3749 | 2 | 54.08 | 7        | F7:16198 | 17112021_RID_2349_DP7.raw |          |          |     |
| L.YQFGEMINQK.T           | Y    | 61.03  | 1256.5859 | 10     | 0.0  | 629.3002 | 2 | 42.06 | 7        | F7:12071 | 17112021_RID_2349_DP7.raw |          |          |     |
| K.TATYSYSFENGDIV.C       | Y    | 54.07  | 1565.6885 | 14     | 0.6  | 783.8520 | 2 | 57.78 | 7        | F7:17385 | 17112021_RID_2349_DP7.raw |          |          |     |
| R.ENMNTYDK.K             | N    | 52.21  | 1013.4124 | 8      | 0.7  | 507.7138 | 2 | 19.60 | 7        | F7:4282  | 17112021_RID_2349_DP7.raw |          |          |     |
| K.GKPDATDR.C             | N    | 48.61  | 986.4781  | 9      | -0.5 | 494.2461 | 2 | 11.50 | 7        | F7:1839  | 17112021_RID_2349_DP7.raw |          |          |     |
| C.FRENMNTYDKK.Y          | Y    | 45.46  | 1444.6769 | 11     | -0.4 | 482.5660 | 3 | 21.59 | 7        | F7:4995  | 17112021_RID_2349_DP7.raw |          |          |     |
| R.ENMNTYDKK.Y            | N    | 43.49  | 1141.5073 | 9      | -0.1 | 571.7609 | 2 | 15.11 | 7        | F7:2868  | 17112021_RID_2349_DP7.raw |          |          |     |
| K.KYMLYSIFD.C            | N    | 43.04  | 1178.5681 | 9      | 0.2  | 590.2914 | 2 | 60.72 | 7        | F7:18383 | 17112021_RID_2349_DP7.raw |          |          |     |
| R.ENMNTYDKKY.M           | Y    | 42.65  | 1304.5707 | 10     | -0.7 | 653.2922 | 2 | 23.23 | 7        | F7:5555  | 17112021_RID_2349_DP7.raw |          |          |     |
| Q.FGEMINQK.T             | Y    | 39.53  | 965.4641  | 8      | -0.3 | 483.7391 | 2 | 31.06 | 7        | F7:8248  | 17112021_RID_2349_DP7.raw |          |          |     |
| C.FRENMNTYDK.K           | Y    | 39.33  | 1316.5819 | 10     | 0.4  | 659.2985 | 2 | 24.51 | 7        | F7:6037  | 17112021_RID_2349_DP7.raw |          |          |     |

tota

AAZ53181.1  
[back to list](#)

| [Protein Coverage](#) | [Supporting Peptides](#) |  
Protein Coverage:

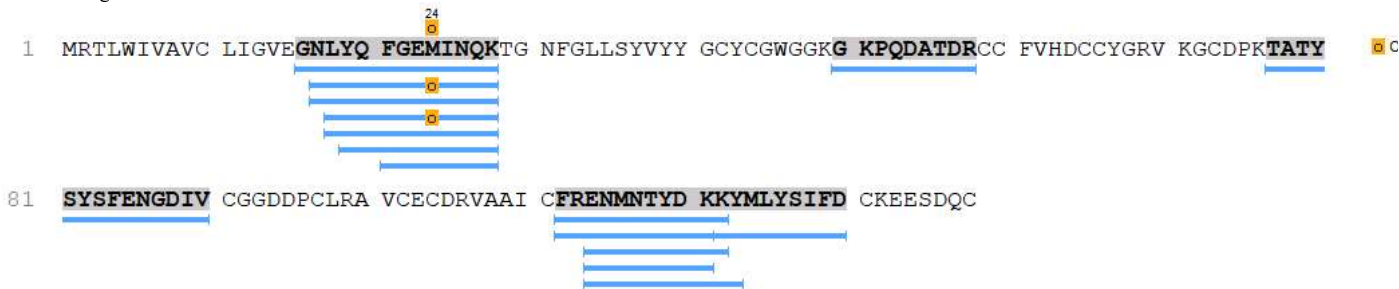

Supporting Peptides:

| Peptide                  | Uniq | -10lgP | Mass      | Length | ppm  | m/z      | z | RT    | Fraction | Scan     | Source File               | Area F1  | Area F2  | A   |
|--------------------------|------|--------|-----------|--------|------|----------|---|-------|----------|----------|---------------------------|----------|----------|-----|
| G.NLYQFGEM(+15.99)INQK.T | Y    | 70.27  | 1499.7079 | 12     | -0.1 | 750.8611 | 2 | 48.50 | 7        | F7:14280 | 17112021_RID_2349_DP7.raw | 1.5509E5 | 5.2464E4 | 2.1 |
| G.NLYQFGEMINQK.T         | Y    | 69.45  | 1483.7129 | 12     | 0.2  | 742.8639 | 2 | 50.67 | 7        | F7:15227 | 17112021_RID_2349_DP7.raw | 4.284E5  |          | 1.0 |
| N.LYQFGEM(+15.99)INQK.T  | Y    | 66.62  | 1385.6649 | 11     | 0.4  | 693.8400 | 2 | 39.94 | 7        | F7:11327 | 17112021_RID_2349_DP7.raw |          |          |     |
| N.LYQFGEMINQK.T          | Y    | 66.11  | 1369.6700 | 11     | 0.2  | 685.8424 | 2 | 47.17 | 7        | F7:13715 | 17112021_RID_2349_DP7.raw |          |          |     |
| E.GNLYQFGEMINQK.T        | Y    | 61.39  | 1540.7344 | 13     | 0.5  | 771.3749 | 2 | 54.08 | 7        | F7:16198 | 17112021_RID_2349_DP7.raw |          |          |     |
| L.YQFGEMINQK.T           | Y    | 61.03  | 1256.5859 | 10     | 0.0  | 629.3002 | 2 | 42.06 | 7        | F7:12071 | 17112021_RID_2349_DP7.raw |          |          |     |
| K.TATYSYSFENGDIV.C       | Y    | 54.07  | 1565.6885 | 14     | 0.6  | 783.8520 | 2 | 57.78 | 7        | F7:17385 | 17112021_RID_2349_DP7.raw |          |          |     |
| R.ENMNTYDK.K             | N    | 52.21  | 1013.4124 | 8      | 0.7  | 507.7138 | 2 | 19.60 | 7        | F7:4282  | 17112021_RID_2349_DP7.raw |          |          |     |
| K.GKPQDATDR.C            | N    | 48.61  | 986.4781  | 9      | -0.5 | 494.2461 | 2 | 11.50 | 7        | F7:1839  | 17112021_RID_2349_DP7.raw |          |          |     |
| C.FRENMNTYDKK.Y          | Y    | 45.46  | 1444.6769 | 11     | -0.4 | 482.5660 | 3 | 21.59 | 7        | F7:4995  | 17112021_RID_2349_DP7.raw |          |          |     |
| R.ENMNTYDKK.Y            | N    | 43.49  | 1141.5073 | 9      | -0.1 | 571.7609 | 2 | 15.11 | 7        | F7:2868  | 17112021_RID_2349_DP7.raw |          |          |     |
| K.KYMLYSIFD.C            | N    | 43.04  | 1178.5681 | 9      | 0.2  | 590.2914 | 2 | 60.72 | 7        | F7:18383 | 17112021_RID_2349_DP7.raw |          |          |     |
| R.ENMNTYDKKY.M           | Y    | 42.65  | 1304.5707 | 10     | -0.7 | 653.2922 | 2 | 23.23 | 7        | F7:5555  | 17112021_RID_2349_DP7.raw |          |          |     |
| Q.FGEMINQK.T             | Y    | 39.53  | 965.4641  | 8      | -0.3 | 483.7391 | 2 | 31.06 | 7        | F7:8248  | 17112021_RID_2349_DP7.raw |          |          |     |
| C.FRENMNTYDK.K           | Y    | 39.33  | 1316.5819 | 10     | 0.4  | 659.2985 | 2 | 24.51 | 7        | F7:6037  | 17112021_RID_2349_DP7.raw |          |          |     |

tota

A8CG87.1

[back to list](#)

[Protein Coverage](#) | [Supporting Peptides](#) |

Protein Coverage:

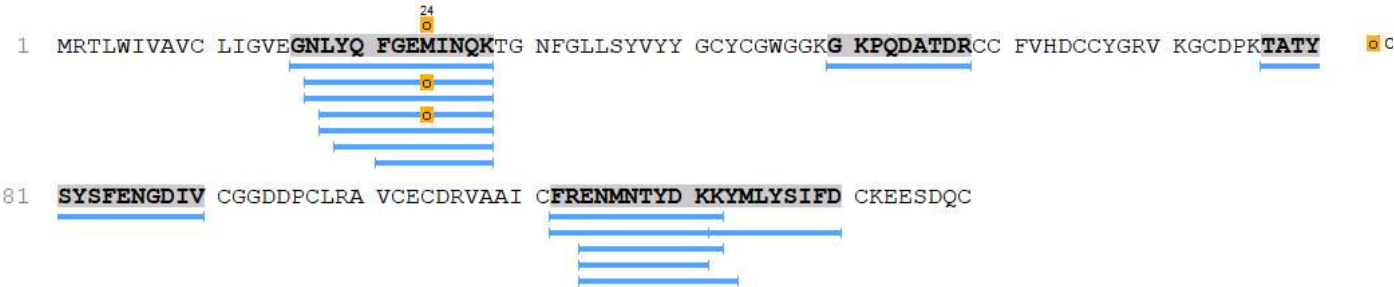

Supporting Peptides:

| Peptide                  | Uniq | -10lgP | Mass      | Length | ppm  | m/z      | z | RT    | Fraction | Scan     | Source File               | Area F1  | Area F2  | A   |
|--------------------------|------|--------|-----------|--------|------|----------|---|-------|----------|----------|---------------------------|----------|----------|-----|
| G.NLYQFGEM(+15.99)INQK.T | Y    | 70.27  | 1499.7079 | 12     | -0.1 | 750.8611 | 2 | 48.50 | 7        | F7:14280 | 17112021_RID_2349_DP7.raw | 1.5509E5 | 5.2464E4 | 2.1 |
| G.NLYQFGEMINQK.T         | Y    | 69.45  | 1483.7129 | 12     | 0.2  | 742.8639 | 2 | 50.67 | 7        | F7:15227 | 17112021_RID_2349_DP7.raw | 4.284E5  |          | 1.0 |
| N.LYQFGEM(+15.99)INQK.T  | Y    | 66.62  | 1385.6649 | 11     | 0.4  | 693.8400 | 2 | 39.94 | 7        | F7:11327 | 17112021_RID_2349_DP7.raw |          |          |     |
| N.LYQFGEMINQK.T          | Y    | 66.11  | 1369.6700 | 11     | 0.2  | 685.8424 | 2 | 47.17 | 7        | F7:13715 | 17112021_RID_2349_DP7.raw |          |          |     |
| E.GNLYQFGEMINQK.T        | Y    | 61.39  | 1540.7344 | 13     | 0.5  | 771.3749 | 2 | 54.08 | 7        | F7:16198 | 17112021_RID_2349_DP7.raw |          |          |     |
| L.YQFGEMINQK.T           | Y    | 61.03  | 1256.5859 | 10     | 0.0  | 629.3002 | 2 | 42.06 | 7        | F7:12071 | 17112021_RID_2349_DP7.raw |          |          |     |
| K.TATYSYSFENGDIV.C       | Y    | 54.07  | 1565.6885 | 14     | 0.6  | 783.8520 | 2 | 57.78 | 7        | F7:17385 | 17112021_RID_2349_DP7.raw |          |          |     |
| R.ENMNTYDK.K             | N    | 52.21  | 1013.4124 | 8      | 0.7  | 507.7138 | 2 | 19.60 | 7        | F7:4282  | 17112021_RID_2349_DP7.raw |          |          |     |
| K.GKPQDATDR.C            | N    | 48.61  | 986.4781  | 9      | -0.5 | 494.2461 | 2 | 11.50 | 7        | F7:1839  | 17112021_RID_2349_DP7.raw |          |          |     |
| C.FRENMNTYDKK.Y          | Y    | 45.46  | 1444.6769 | 11     | -0.4 | 482.5660 | 3 | 21.59 | 7        | F7:4995  | 17112021_RID_2349_DP7.raw |          |          |     |
| R.ENMNTYDKK.Y            | N    | 43.49  | 1141.5073 | 9      | -0.1 | 571.7609 | 2 | 15.11 | 7        | F7:2868  | 17112021_RID_2349_DP7.raw |          |          |     |
| K.KYMLYSIFD.C            | N    | 43.04  | 1178.5681 | 9      | 0.2  | 590.2914 | 2 | 60.72 | 7        | F7:18383 | 17112021_RID_2349_DP7.raw |          |          |     |

tota

| Peptide        | Uniq | -10lgP | Mass      | Length | ppm  | m/z      | z | RT    | Fraction | Scan    | Source File               | Area F1 | Area F2 | A |
|----------------|------|--------|-----------|--------|------|----------|---|-------|----------|---------|---------------------------|---------|---------|---|
| R.ENMNTYDKKY.M | Y    | 42.65  | 1304.5707 | 10     | -0.7 | 653.2922 | 2 | 23.23 | 7        | F7:5555 | 17112021_RID_2349_DP7.raw |         |         |   |
| Q.FGEMINQK.T   | Y    | 39.53  | 965.4641  | 8      | -0.3 | 483.7391 | 2 | 31.06 | 7        | F7:8248 | 17112021_RID_2349_DP7.raw |         |         |   |
| C.FRENMNTYDK.K | Y    | 39.33  | 1316.5819 | 10     | 0.4  | 659.2985 | 2 | 24.51 | 7        | F7:6037 | 17112021_RID_2349_DP7.raw |         |         |   |

tota

TRINITY\_DN64  
[back to list](#)

| [Protein Coverage](#) | [Supporting Peptides](#) |  
Protein Coverage:

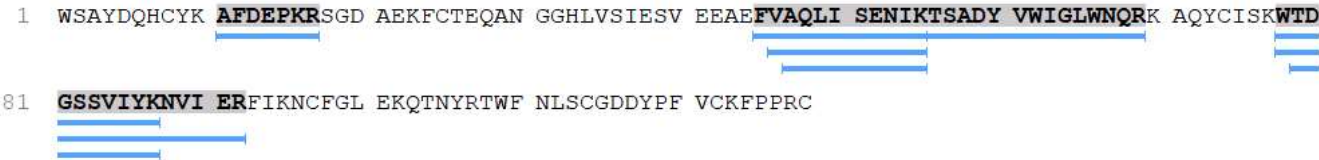

Supporting Peptides:

| Peptide             | Uniq | -10lgP | Mass      | Length | ppm  | m/z      | z | RT    | Fraction | Scan     | Source File               | Area F1  | Area F2  | Area   |
|---------------------|------|--------|-----------|--------|------|----------|---|-------|----------|----------|---------------------------|----------|----------|--------|
| K.TSADYVWIGLWNQR.K  | Y    | 81.64  | 1707.8369 | 14     | 0.9  | 854.9265 | 2 | 65.28 | 5        | F5:19507 | 17112021_RID_2349_DP5.raw |          |          | 5.8246 |
| K.WTDGSSVIYK.N      | N    | 77.27  | 1154.5608 | 10     | 0.0  | 578.2877 | 2 | 37.40 | 5        | F5:10403 | 17112021_RID_2349_DP5.raw | 2.1576E5 | 2.5151E5 | 1.7167 |
| K.WTDGSSVIYKNVIER.F | N    | 71.65  | 1765.8999 | 15     | 0.3  | 883.9575 | 2 | 44.92 | 5        | F5:12969 | 17112021_RID_2349_DP5.raw |          |          |        |
| F.VAQLISENIK.T      | N    | 48.99  | 1113.6394 | 10     | -0.4 | 557.8268 | 2 | 37.53 | 5        | F5:10425 | 17112021_RID_2349_DP5.raw |          |          |        |
| W.TDGSSVIYK.N       | N    | 44.54  | 968.4814  | 9      | 0.1  | 485.2480 | 2 | 26.37 | 5        | F5:6664  | 17112021_RID_2349_DP5.raw |          |          |        |
| E.FVAQLISENIK.T     | N    | 44.08  | 1260.7078 | 11     | 0.3  | 631.3613 | 2 | 49.39 | 5        | F5:14370 | 17112021_RID_2349_DP5.raw |          |          |        |
| K.AFDEPKR.S         | N    | 40.54  | 861.4344  | 7      | -0.5 | 431.7243 | 2 | 18.04 | 5        | F5:3641  | 17112021_RID_2349_DP5.raw |          |          |        |
| V.AQLISENIK.T       | N    | 39.19  | 1014.5709 | 9      | 0.0  | 508.2927 | 2 | 33.55 | 5        | F5:9140  | 17112021_RID_2349_DP5.raw |          |          |        |

total 8 peptides

B4XSY9.1  
[back to list](#)

| [Protein Coverage](#) | [Supporting Peptides](#) |  
Protein Coverage:

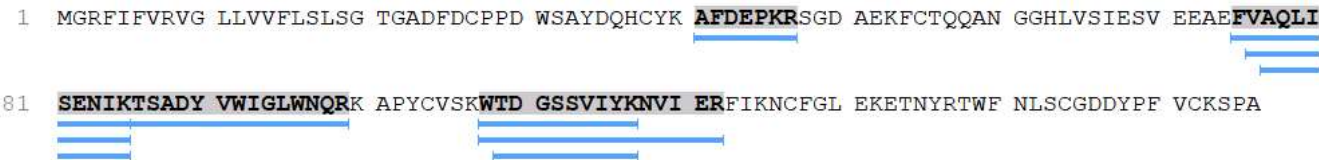

Supporting Peptides:

| Peptide             | Uniq | -10lgP | Mass      | Length | ppm  | m/z      | z | RT    | Fraction | Scan     | Source File               | Area F1  | Area F2  | Area   |
|---------------------|------|--------|-----------|--------|------|----------|---|-------|----------|----------|---------------------------|----------|----------|--------|
| K.TSADYVWIGLWNQR.K  | Y    | 81.64  | 1707.8369 | 14     | 0.9  | 854.9265 | 2 | 65.28 | 5        | F5:19507 | 17112021_RID_2349_DP5.raw |          |          | 5.8246 |
| K.WTDGSSVIYK.N      | N    | 77.27  | 1154.5608 | 10     | 0.0  | 578.2877 | 2 | 37.40 | 5        | F5:10403 | 17112021_RID_2349_DP5.raw | 2.1576E5 | 2.5151E5 | 1.7167 |
| K.WTDGSSVIYKNVIER.F | N    | 71.65  | 1765.8999 | 15     | 0.3  | 883.9575 | 2 | 44.92 | 5        | F5:12969 | 17112021_RID_2349_DP5.raw |          |          |        |
| F.VAQLISENIK.T      | N    | 48.99  | 1113.6394 | 10     | -0.4 | 557.8268 | 2 | 37.53 | 5        | F5:10425 | 17112021_RID_2349_DP5.raw |          |          |        |
| W.TDGSSVIYK.N       | N    | 44.54  | 968.4814  | 9      | 0.1  | 485.2480 | 2 | 26.37 | 5        | F5:6664  | 17112021_RID_2349_DP5.raw |          |          |        |
| E.FVAQLISENIK.T     | N    | 44.08  | 1260.7078 | 11     | 0.3  | 631.3613 | 2 | 49.39 | 5        | F5:14370 | 17112021_RID_2349_DP5.raw |          |          |        |
| K.AFDEPKR.S         | N    | 40.54  | 861.4344  | 7      | -0.5 | 431.7243 | 2 | 18.04 | 5        | F5:3641  | 17112021_RID_2349_DP5.raw |          |          |        |
| V.AQLISENIK.T       | N    | 39.19  | 1014.5709 | 9      | 0.0  | 508.2927 | 2 | 33.55 | 5        | F5:9140  | 17112021_RID_2349_DP5.raw |          |          |        |

total 8 peptides

ABW82661.1  
[back to list](#)

| [Protein Coverage](#) | [Supporting Peptides](#) |  
Protein Coverage:

1 MGRFIFVRVG LLVVFLSLSG TGADFDCCPD WSAYDQHCYK AFDEPKRSGD AEKFC TQQAN GGHLVSIESV EEAEFVAQLI

81 SENIKTSADY VWIGLWNQRK APYCVSKWTD GSSVIYKNVI ERFIKNCFGL EKETNYRTWF NLSCGDDYPF VCKSPA

Supporting Peptides:

| Peptide             | Uniq -10lgP | Mass  | Length    | ppm | m/z  | z        | RT | Fraction | Scan | Source File                        | Area F1  | Area F2  | Area   |
|---------------------|-------------|-------|-----------|-----|------|----------|----|----------|------|------------------------------------|----------|----------|--------|
| K.TSADYVWIGLWNQR.K  | Y           | 81.64 | 1707.8369 | 14  | 0.9  | 854.9265 | 2  | 65.28    | 5    | F5:19507 17112021_RID_2349_DP5.raw |          |          | 5.8246 |
| K.WTDGSSVIYK.N      | N           | 77.27 | 1154.5608 | 10  | 0.0  | 578.2877 | 2  | 37.40    | 5    | F5:10403 17112021_RID_2349_DP5.raw | 2.1576E5 | 2.5151E5 | 1.7167 |
| K.WTDGSSVIYKNVIER.F | N           | 71.65 | 1765.8999 | 15  | 0.3  | 883.9575 | 2  | 44.92    | 5    | F5:12969 17112021_RID_2349_DP5.raw |          |          |        |
| F.VAQLISENIK.T      | N           | 48.99 | 1113.6394 | 10  | -0.4 | 557.8268 | 2  | 37.53    | 5    | F5:10425 17112021_RID_2349_DP5.raw |          |          |        |
| W.TDGSSVIYK.N       | N           | 44.54 | 968.4814  | 9   | 0.1  | 485.2480 | 2  | 26.37    | 5    | F5:6664 17112021_RID_2349_DP5.raw  |          |          |        |
| E.FVAQLISENIK.T     | N           | 44.08 | 1260.7078 | 11  | 0.3  | 631.3613 | 2  | 49.39    | 5    | F5:14370 17112021_RID_2349_DP5.raw |          |          |        |
| K.AFDEPKR.S         | N           | 40.54 | 861.4344  | 7   | -0.5 | 431.7243 | 2  | 18.04    | 5    | F5:3641 17112021_RID_2349_DP5.raw  |          |          |        |
| V.AQLISENIK.T       | N           | 39.19 | 1014.5709 | 9   | 0.0  | 508.2927 | 2  | 33.55    | 5    | F5:9140 17112021_RID_2349_DP5.raw  |          |          |        |

total 8 peptides

B4XSZ0.1  
[back to list](#)

[Protein Coverage](#) | [Supporting Peptides](#) |  
Protein Coverage:

1 MGRFIFVRVG LLVVFLSLSG TGADFDCCPD WSAYDQHCYK AFDEPKRSGD AEKFC TQQAN GGHLVSIESV EEAEFVAQLI

81 SENIKTSADY VWIGLWNQRK APYCVSKWTD GSSVIYKNVI ERFIKNCFGL EKETNYRTWF NLSCGDDYPF VCKSPA

Supporting Peptides:

| Peptide             | Uniq -10lgP | Mass  | Length    | ppm | m/z  | z        | RT | Fraction | Scan | Source File                        | Area F1  | Area F2  | Area   |
|---------------------|-------------|-------|-----------|-----|------|----------|----|----------|------|------------------------------------|----------|----------|--------|
| K.TSADYVWIGLWNQR.K  | Y           | 81.64 | 1707.8369 | 14  | 0.9  | 854.9265 | 2  | 65.28    | 5    | F5:19507 17112021_RID_2349_DP5.raw |          |          | 5.8246 |
| K.WTDGSSVIYK.N      | N           | 77.27 | 1154.5608 | 10  | 0.0  | 578.2877 | 2  | 37.40    | 5    | F5:10403 17112021_RID_2349_DP5.raw | 2.1576E5 | 2.5151E5 | 1.7167 |
| K.WTDGSSVIYKNVIER.F | N           | 71.65 | 1765.8999 | 15  | 0.3  | 883.9575 | 2  | 44.92    | 5    | F5:12969 17112021_RID_2349_DP5.raw |          |          |        |
| F.VAQLISENIK.T      | N           | 48.99 | 1113.6394 | 10  | -0.4 | 557.8268 | 2  | 37.53    | 5    | F5:10425 17112021_RID_2349_DP5.raw |          |          |        |
| W.TDGSSVIYK.N       | N           | 44.54 | 968.4814  | 9   | 0.1  | 485.2480 | 2  | 26.37    | 5    | F5:6664 17112021_RID_2349_DP5.raw  |          |          |        |
| E.FVAQLISENIK.T     | N           | 44.08 | 1260.7078 | 11  | 0.3  | 631.3613 | 2  | 49.39    | 5    | F5:14370 17112021_RID_2349_DP5.raw |          |          |        |
| K.AFDEPKR.S         | N           | 40.54 | 861.4344  | 7   | -0.5 | 431.7243 | 2  | 18.04    | 5    | F5:3641 17112021_RID_2349_DP5.raw  |          |          |        |
| V.AQLISENIK.T       | N           | 39.19 | 1014.5709 | 9   | 0.0  | 508.2927 | 2  | 33.55    | 5    | F5:9140 17112021_RID_2349_DP5.raw  |          |          |        |

total 8 peptides

ABW82662.1  
[back to list](#)

[Protein Coverage](#) | [Supporting Peptides](#) |  
Protein Coverage:

1 MGRFIFVRVG LLVVFLSLSG TGADFDCCPD WSAYDQHCYK AFDEPKRSGD AEKFC TQQAN GGHLVSIESV EEAEFVAQLI

81 SENIKTSADY VWIGLWNQRK APYCVSKWTD GSSVIYKNVI ERFIKNCFGL EKETNYRTWF NLSCGDDYPF VCKSPA

Supporting Peptides:

| Peptide             | Uniq -10lgP | Mass  | Length    | ppm | m/z | z        | RT | Fraction | Scan | Source File                        | Area F1  | Area F2  | Area   |
|---------------------|-------------|-------|-----------|-----|-----|----------|----|----------|------|------------------------------------|----------|----------|--------|
| K.TSADYVWIGLWNQR.K  | Y           | 81.64 | 1707.8369 | 14  | 0.9 | 854.9265 | 2  | 65.28    | 5    | F5:19507 17112021_RID_2349_DP5.raw |          |          | 5.8246 |
| K.WTDGSSVIYK.N      | N           | 77.27 | 1154.5608 | 10  | 0.0 | 578.2877 | 2  | 37.40    | 5    | F5:10403 17112021_RID_2349_DP5.raw | 2.1576E5 | 2.5151E5 | 1.7167 |
| K.WTDGSSVIYKNVIER.F | N           | 71.65 | 1765.8999 | 15  | 0.3 | 883.9575 | 2  | 44.92    | 5    | F5:12969 17112021_RID_2349_DP5.raw |          |          |        |

total 8 peptides

| Peptide         | Uniq | -10lgP | Mass      | Length | ppm  | m/z      | z | RT    | Fraction | Scan     | Source File               | Area F1 | Area F2 | Area F3 |
|-----------------|------|--------|-----------|--------|------|----------|---|-------|----------|----------|---------------------------|---------|---------|---------|
| F.VAQLISENIK.T  | N    | 48.99  | 1113.6394 | 10     | -0.4 | 557.8268 | 2 | 37.53 | 5        | F5:10425 | 17112021_RID_2349_DP5.raw |         |         |         |
| W.TDGSSVIYK.N   | N    | 44.54  | 968.4814  | 9      | 0.1  | 485.2480 | 2 | 26.37 | 5        | F5:6664  | 17112021_RID_2349_DP5.raw |         |         |         |
| E.FVAQLISENIK.T | N    | 44.08  | 1260.7078 | 11     | 0.3  | 631.3613 | 2 | 49.39 | 5        | F5:14370 | 17112021_RID_2349_DP5.raw |         |         |         |
| K.AFDEPKR.S     | N    | 40.54  | 861.4344  | 7      | -0.5 | 431.7243 | 2 | 18.04 | 5        | F5:3641  | 17112021_RID_2349_DP5.raw |         |         |         |
| V.AQLISENIK.T   | N    | 39.19  | 1014.5709 | 9      | 0.0  | 508.2927 | 2 | 33.55 | 5        | F5:9140  | 17112021_RID_2349_DP5.raw |         |         |         |

total 8 peptides

TRINITY\_DN91  
[back to list](#)

[Protein Coverage](#) | [Supporting Peptides](#) |  
Protein Coverage:

|     |            |     |            |             |            |            |             |            |            |            |  |  |  |  |
|-----|------------|-----|------------|-------------|------------|------------|-------------|------------|------------|------------|--|--|--|--|
| 1   | MAKGFFISK  | LG  | VVGIVLGL   | GAVATIIALS  | VVYSQEKQRA | DELANQAPSS | TSVAGTPSAT  | IAGTAQATTT | NGTIQATTVK |            |  |  |  |  |
| 81  | PLEPWDHMR  | L   | PKTLMPTFYT | ISLQPFLLIPD | LYIFKGNSTV | EFQCKQPTDL | ILIHSSKKLNY | TIQGPFLVSL | TGTKVVAPAI |            |  |  |  |  |
| 161 | DSTWLEDKTE | YL  | VVKLKENL   | QQNENYQLHA  | SFTGELADDL | AGFYRSEYTE | GVARQVLATT  | QMQAADARKA | FPCFDEPAMK |            |  |  |  |  |
| 241 | ANFSITLIHL | PTY | KALSNMP    | IKKAEVVKMP  | DGSTWVQTEF | HPTLKMSTYL | LGFIWSEFEN  | VSTIENNTLI | QIWGRPTAIR |            |  |  |  |  |
| 321 | EGQGNALNA  | TWP | ILSFFEQ    | QYSVPYPLTR  | LDQVALPDFN | AGAMENWGLI | TYRESALLFD  | EKYSSIGNKE | RIVTVIAHEV |            |  |  |  |  |
| 401 | AHQWFGNLVT | LEW | WNELWLN    | EGFASYVEYL  | GAHEAESTWN | IRDLPVPNDV | YRVMAIDALA  | SSHPLSSPAE | EINTPAQISE |            |  |  |  |  |
| 481 | VFDAISYSKG | AAV | IRMLAEF    | LTDAVFREGL  | QTYFETYQYG | NTVCDDLWEQ | LQKAVSKKNV  | YLPSTVKTIM | DRWTLQMGFP |            |  |  |  |  |
| 561 | VLTVDTSKGI | ITQ | KHLLDP     | ESPVERPSQF  | NYVWIVPVSW | LSKGKEAEMY | WLTDLAENA   | NFSTSTDPAQ | WLLNVNVTG  |            |  |  |  |  |
| 641 | YFRVNYDLGN | WQR | LMNQLNE    | DLQTIPVLNR  | AQIIDDAFNL | ARAKHVGTDL | ALNTRYLAQ   | ERDYLWDAA  | LDNLDFR    | LM         |  |  |  |  |
| 721 | FDRSEVYGPM | QK  | YIRKQVTP   | LFDHFRNLTH  | NWTQIPDGLM | NQYNQILAIR | TACSHGVPGC  | NELASSWFEA | WKNPNVNDI  | I          |  |  |  |  |
| 801 | SPNLRSAVYC | SAI | RTGSLED    | WDFAWKMRQ   | APVISEADKL | RSALTCSQTP | WILQRYLQYT  | LDPSMIR    | RQD        | AMSTINSIAS |  |  |  |  |
| 881 | NVVGQSLAWD | FVR | MNWK       | TLFQQFGR    | SSFSF      | SSLIQSVTQR | FASPFELQQL  | EQFKADNADV | GFGSATRALE | QALERTKANI |  |  |  |  |
| 961 | KWVAENKALV | LKW | FQDNS      |             |            |            |             |            |            |            |  |  |  |  |

Supporting Peptides:

| Peptide            | Uniq | -10lgP | Mass      | Length | ppm | m/z      | z | RT    | Fraction | Scan     | Source File               | Area F1  | Area F2 | Area F3 | Area F4 |
|--------------------|------|--------|-----------|--------|-----|----------|---|-------|----------|----------|---------------------------|----------|---------|---------|---------|
| R.AQIIDDAFNLAR.A   | N    | 93.46  | 1345.6990 | 12     | 0.6 | 673.8572 | 2 | 54.45 | 1        | F1:16660 | 12112021_RID_2349_DP1.raw | 1.3295E6 |         |         |         |
| R.VNYDLGNWQR.L     | Y    | 60.42  | 1263.5996 | 10     | 1.0 | 632.8077 | 2 | 44.31 | 1        | F1:13320 | 12112021_RID_2349_DP1.raw | 6.6887E4 |         |         |         |
| R.YLQYTLDPSPMIR.R  | Y    | 59.84  | 1498.7490 | 12     | 0.1 | 750.3818 | 2 | 54.59 | 1        | F1:16715 | 12112021_RID_2349_DP1.raw | 2.8801E5 |         |         |         |
| K.ADNADVGFSGSATR.A | N    | 56.38  | 1279.5792 | 13     | 0.7 | 640.7974 | 2 | 31.66 | 1        | F1:9065  | 12112021_RID_2349_DP1.raw | 7.2844E4 |         |         |         |
| K.TLFQQFGR.S       | Y    | 50.21  | 995.5189  | 8      | 0.2 | 498.7668 | 2 | 44.91 | 1        | F1:13507 | 12112021_RID_2349_DP1.raw | 1.1534E5 |         |         |         |
| K.NPNVNNDISPNL.R.S | Y    | 47.74  | 1465.7273 | 13     | 1.2 | 733.8718 | 2 | 37.43 | 1        | F1:11020 | 12112021_RID_2349_DP1.raw | 4.7098E4 |         |         |         |
| R.LMFDRSEVYGPMQK.Y | N    | 39.50  | 1699.8062 | 14     | 0.1 | 567.6094 | 3 | 44.88 | 1        | F1:13512 | 12112021_RID_2349_DP1.raw | 8.2001E4 |         |         |         |

total 7 peptides

TRINITY\_DN91  
[back to list](#)

[Protein Coverage](#) | [Supporting Peptides](#) |  
Protein Coverage:

|     |            |            |            |             |            |            |            |            |            |
|-----|------------|------------|------------|-------------|------------|------------|------------|------------|------------|
| 1   | MAKGFFISKS | LGVVGIVLGL | GAVATIIALS | VVYSQEKQRA  | DELANQAPSS | TSVAGTPSAT | IAGTAQATTT | NGTIQATTVK |            |
| 81  | PLEPWDHMR  | L          | PKTLMPTFYT | ISLQPFLLIPD | LYIFKGNSTV | EFQCKQPTDL | ILIHSSKKNY | TIQGPFLVSL | TGTKVVAPAI |
| 161 | DSTWLEDKTE | YL         | VVKLKENL   | QQNENYQLHA  | SFTGELADDL | AGFYRSEYTE | GVAR       | KVLATT     | QMQAADARKA |
| 241 | ANFSITLIHL | PTYKALS    | NMP        | IKKAEV      | KMP        | DGSTWVQTEF | HPTLKMSTYL | LG         | FIVSEFEN   |
| 321 | EGQGN      | YALNA      | TWPILSFFEQ | QYSVPYPLTR  | LDQVALPDFN | AGAMENWGLI | TYRESALLFD | EKYSSIGNKE | RIVTVIAHEV |
| 401 | AHQWFGNLVT | LEWWNELWLN | EGFASYVEYL | GAHEAESTWN  | IRDLIVPNDV | YRVMAIDALA | SSHPLSSPAE | EINTPAQISE |            |
| 481 | VFDAISYSKG | AAVIRMLAEF | LTD        | AVFREGL     | QTYFETYQYG | NTVCDDLWEQ | LQKAVS     | KKNV       | YLPSTVKTIM |
| 561 | VLTVDTSGKI | ITQKHFL    | LDP        | ESPVERPSQF  | NYVWIVPVSW | LSKGKEAEMY | WLTDILAENA | NFSTSTDPAQ | WLLLN      |
| 641 | YFR        | VNYDLGN    | WQRL       | MNQLNE      | DLQTIPVLNR | AQIIDDAFNL | ARAKHVGTDL | ALNTRYLAQ  | ERDYL      |
| 721 | FDRSEVYGPM | QK         | YIRKQVTP   | LFDHFRNLTH  | NWTQIPDGLM | NQYNQILAIR | TACSHGVP   | GC         | NELASSWFEA |
| 801 | SPNLR      | SAVYC      | SAIRTGSLED | WDFAWKMFRQ  | APVISEADKL | RSALTCSQTP | WILQR      | YLQYT      | LDPSMIR    |
| 881 | NVVGQSLAWD | FVRMNW     | TLF        | QQFGR       | SSFSF      | SSLIQSVTQR | FASPFELQQL | EQFK       | ADNADV     |
|     |            |            |            |             |            |            |            |            | GFGSATRALE |
| 961 | KWVAENKALV | LKWFQDNS   |            |             |            |            |            |            |            |

Supporting Peptides:

| Peptide             | Uniq | -10lgP | Mass      | Length | ppm | m/z      | z | RT    | Fraction | Scan     | Source File               | Area F1  | Area F2 | Area F3 | Area F4 |
|---------------------|------|--------|-----------|--------|-----|----------|---|-------|----------|----------|---------------------------|----------|---------|---------|---------|
| R.AQIIDDAFNLAR.A    | N    | 93.46  | 1345.6990 | 12     | 0.6 | 673.8572 | 2 | 54.45 | 1        | F1:16660 | 12112021_RID_2349_DP1.raw | 1.3295E6 |         |         |         |
| R.VNYDLGNWQR.L      | Y    | 60.42  | 1263.5996 | 10     | 1.0 | 632.8077 | 2 | 44.31 | 1        | F1:13320 | 12112021_RID_2349_DP1.raw | 6.6887E4 |         |         |         |
| R.YLQYTLDPSMIR.R    | Y    | 59.84  | 1498.7490 | 12     | 0.1 | 750.3818 | 2 | 54.59 | 1        | F1:16715 | 12112021_RID_2349_DP1.raw | 2.8801E5 |         |         |         |
| K.ADNADVGFSGSATRA.A | N    | 56.38  | 1279.5792 | 13     | 0.7 | 640.7974 | 2 | 31.66 | 1        | F1:9065  | 12112021_RID_2349_DP1.raw | 7.2844E4 |         |         |         |
| K.TLFQQFGR.S        | Y    | 50.21  | 995.5189  | 8      | 0.2 | 498.7668 | 2 | 44.91 | 1        | F1:13507 | 12112021_RID_2349_DP1.raw | 1.1534E5 |         |         |         |
| K.NNPNVNDISP        | Y    | 47.74  | 1465.7273 | 13     | 1.2 | 733.8718 | 2 | 37.43 | 1        | F1:11020 | 12112021_RID_2349_DP1.raw | 4.7098E4 |         |         |         |
| R.LMFDRSEVYGPMQK.Y  | N    | 39.50  | 1699.8062 | 14     | 0.1 | 567.6094 | 3 | 44.88 | 1        | F1:13512 | 12112021_RID_2349_DP1.raw | 8.2001E4 |         |         |         |

total 7 peptides

TRINITY\_DN91

[back to list](#)

| [Protein Coverage](#) | [Supporting Peptides](#) |

Protein Coverage:

|     |            |            |            |             |            |            |            |            |            |
|-----|------------|------------|------------|-------------|------------|------------|------------|------------|------------|
| 1   | MAKGFFISKS | LGVVGIVLGL | GAVATIIALS | VVYSQEKQRA  | DELANQAPSS | TSVAGTPSAT | IAGTAQATTT | NGTIQATTVK |            |
| 81  | PLEPWDHMR  | L          | PKTLMPTFYT | ISLQPFLLIPD | LYIFKGNSTV | EFQCKQPTDL | ILIHSSKKNY | TIQGPFLVSL | TGTKVVAPAI |
| 161 | DSTWLEDKTE | YL         | VVKLKENL   | QQNENYQLHA  | SFTGELADDL | AGFYRSEYTE | GVAR       | KVLATT     | QMQAADARKA |
| 241 | ANFSITLIHL | PTYKALS    | NMP        | IKKAEV      | KMP        | DGSTWVQTEF | HPTLKMSTYL | LG         | FIVSEFEN   |
| 321 | EGQGN      | YALNA      | TWPILSFFEQ | QYSVPYPLTR  | LDQVALPDFN | AGAMENWGLI | TYRESALLFD | EKYSSIGNKE | RIVTVIAHEV |
| 401 | AHQWFGNLVT | LEWWNELWLN | EGFASYVEYL | GAHEAESTWN  | IRDLIVPNDV | YRVMAIDALA | SSHPLSSPAE | EINTPAQISE |            |
| 481 | VFDAISYSKG | AAVIRMLAEF | LTD        | AVFREGL     | QTYFETYQYG | NTVCDDLWEQ | LQKAVS     | KKNV       | YLPSTVKTIM |
| 561 | VLTVDTSGKI | ITQKHFL    | LDP        | ESPVERPSQF  | NYVWIVPVSW | LSKGKEAEMY | WLTDILAENA | NFSTSTDPAQ | WLLLN      |
| 641 | YFR        | VNYDLGN    | WQRL       | MNQLNE      | DLQTIPVLNR | AQIIDDAFNL | ARAKHVGTDL | ALNTRYLAQ  | ERDYL      |
| 721 | FDRSEVYGPM | QK         | YIRKQVTP   | LFDHFRNLTH  | NWTQIPDGLM | NQYNQILAIR | TACSHGVP   | GC         | NELASSWFEA |
| 801 | SPNLR      | SAVYC      | SAIRTGSLED | WDFAWKMFRQ  | APVISEADKL | RSALTCSQTP | WILQR      | YLQYT      | LDPSMIR    |
| 881 | NVVGQSLAWD | FVRMNW     | TLF        | QQFGR       | SSFSF      | SSLIQSVTQR | FASPFELQQL | EQFK       | ADNADV     |
|     |            |            |            |             |            |            |            |            | GFGSATRALE |
| 961 | KWVAENKALV | LKWFQDNS   |            |             |            |            |            |            |            |

Supporting Peptides:

| Peptide             | Uniq | -10lgP | Mass      | Length | ppm | m/z      | z | RT    | Fraction | Scan     | Source File               | Area F1  | Area F2 | Area F3 | Area F4 |
|---------------------|------|--------|-----------|--------|-----|----------|---|-------|----------|----------|---------------------------|----------|---------|---------|---------|
| R.AQIIDDAFNLAR.A    | N    | 93.46  | 1345.6990 | 12     | 0.6 | 673.8572 | 2 | 54.45 | 1        | F1:16660 | 12112021_RID_2349_DP1.raw | 1.3295E6 |         |         |         |
| R.VNYDLGNWQR.L      | Y    | 60.42  | 1263.5996 | 10     | 1.0 | 632.8077 | 2 | 44.31 | 1        | F1:13320 | 12112021_RID_2349_DP1.raw | 6.6887E4 |         |         |         |
| R.YLQYTLDPSMIR.R    | Y    | 59.84  | 1498.7490 | 12     | 0.1 | 750.3818 | 2 | 54.59 | 1        | F1:16715 | 12112021_RID_2349_DP1.raw | 2.8801E5 |         |         |         |
| K.ADNADVGFSGSATRA.A | N    | 56.38  | 1279.5792 | 13     | 0.7 | 640.7974 | 2 | 31.66 | 1        | F1:9065  | 12112021_RID_2349_DP1.raw | 7.2844E4 |         |         |         |
| K.TLFQQFGR.S        | Y    | 50.21  | 995.5189  | 8      | 0.2 | 498.7668 | 2 | 44.91 | 1        | F1:13507 | 12112021_RID_2349_DP1.raw | 1.1534E5 |         |         |         |

total 7 peptides

| Peptide            | Uniq | -10lgP | Mass      | Length | ppm | m/z      | z | RT    | Fraction | Scan     | Source File               | Area F1  | Area F2 | Area F3 | Area F4 |
|--------------------|------|--------|-----------|--------|-----|----------|---|-------|----------|----------|---------------------------|----------|---------|---------|---------|
| K.NNPVNNDISPCLR.S  | Y    | 47.74  | 1465.7273 | 13     | 1.2 | 733.8718 | 2 | 37.43 | 1        | F1:11020 | 12112021_RID_2349_DP1.raw | 4.7098E4 |         |         |         |
| R.LMFDRSEVYGPMQK.Y | N    | 39.50  | 1699.8062 | 14     | 0.1 | 567.6094 | 3 | 44.88 | 1        | F1:13512 | 12112021_RID_2349_DP1.raw | 8.2001E4 |         |         |         |

total 7 peptides

TRINITY\_DN91

[back to list](#)

| [Protein Coverage](#) | [Supporting Peptides](#) |

Protein Coverage:

|     |            |     |            |             |            |            |             |            |               |
|-----|------------|-----|------------|-------------|------------|------------|-------------|------------|---------------|
| 1   | MAKGFFISK  | LG  | VVGIVLGL   | GAVATIIALS  | VVYSQEKQRA | DELANQAPSS | TSVAGTPSAT  | IAGTAQATTT | NGTIQATTVK    |
| 81  | PLEPWDHMR  | L   | PKTLMPTFYT | ISLQPFLLIPD | LYIFKGNSTV | EFQCKQPTDL | ILIHSSKLLNY | TIQGPFLVSL | TGTVVAPAI     |
| 161 | DSTWLEDKTE | YL  | VVKLKENL   | QQNENYQLHA  | SFTGELADDL | AGFYRSEYTE | GVARVVLATT  | QMQAADARKA | FPCFDEPAMK    |
| 241 | ANFSITLIHL | PTY | KALSNNP    | IKKAEVVKMP  | DGSTWVQTEF | HPTLMKSTYL | LGFIWSEFEN  | VSTIENNTLI | QIWGRPTAIR    |
| 321 | EGQGNALNA  | TWP | ILSFFEQ    | QYSVPYPLTR  | LDQVALPDFN | AGAMENWGLI | TYRESALLFD  | EKYSSIGNKE | RIVTVIAHEV    |
| 401 | AHQWFGNLVT | LEW | WNLWLN     | EGFASYVEYL  | GAHEAESTWN | IRDLIVPNDV | YRVMAIDALA  | SSHPLSSPAE | EINTPAQISE    |
| 481 | VFDAISYSKG | AAV | IRMLAEF    | LTDVAVFREGL | QTYFETYQYG | NTVCDDLWEQ | LQKAVSKKNV  | YLPSTVKTIM | DRWTLQMGFP    |
| 561 | VLTVDTSKGI | ITQ | KHLLDP     | ESPVERPSQF  | NYVWIVPVSW | LSKGKEAEMY | WLTDILAENA  | NFSTSTDPAQ | WLLNVNVTG     |
| 641 | YFRVNYDLGN | WQR | LMNQLE     | DLQTIPVLNR  | AQIIDDAFNL | ARAKHVGTDL | ALNTRYLAQ   | ERDYLWDAA  | LDNLDYFR      |
| 721 | FDRSEVYGPM | QK  | YIRKQVTP   | LFDHFRNLTH  | NWTQIPDGLM | NQYNQILAIR | TACSHGVPGC  | NELASSWFEA | WNNPNVNDI     |
| 801 | SPNLRSAVYC | SAI | RGSLED     | WDFAWKMFQ   | APVISEADKL | RSALTCSQTP | WILQRYLQYT  | LDPSMIR    | RQDAMSTINSIAS |
| 881 | NVVGQSLAWD | FVR | MNWKTLF    | QQFGRSSFSF  | SSLIQSVTQR | FASPFELQQL | EQFKADNADV  | GFGSATRALE | QALERTKANI    |
| 961 | KWVAENKALV | LKW | FQDNS      |             |            |            |             |            |               |

Supporting Peptides:

| Peptide             | Uniq | -10lgP | Mass      | Length | ppm | m/z      | z | RT    | Fraction | Scan     | Source File               | Area F1  | Area F2 | Area F3 | Area F4 |
|---------------------|------|--------|-----------|--------|-----|----------|---|-------|----------|----------|---------------------------|----------|---------|---------|---------|
| R.AQIIDDAFNLAR.A    | N    | 93.46  | 1345.6990 | 12     | 0.6 | 673.8572 | 2 | 54.45 | 1        | F1:16660 | 12112021_RID_2349_DP1.raw | 1.3295E6 |         |         |         |
| R.VNYDLGNWQR.L      | Y    | 60.42  | 1263.5996 | 10     | 1.0 | 632.8077 | 2 | 44.31 | 1        | F1:13320 | 12112021_RID_2349_DP1.raw | 6.6887E4 |         |         |         |
| R.YLQYTLDPSPMIR.R   | Y    | 59.84  | 1498.7490 | 12     | 0.1 | 750.3818 | 2 | 54.59 | 1        | F1:16715 | 12112021_RID_2349_DP1.raw | 2.8801E5 |         |         |         |
| K.ADNADVGFSGSATRA.A | N    | 56.38  | 1279.5792 | 13     | 0.7 | 640.7974 | 2 | 31.66 | 1        | F1:9065  | 12112021_RID_2349_DP1.raw | 7.2844E4 |         |         |         |
| K.TLFQQFGR.S        | Y    | 50.21  | 995.5189  | 8      | 0.2 | 498.7668 | 2 | 44.91 | 1        | F1:13507 | 12112021_RID_2349_DP1.raw | 1.1534E5 |         |         |         |
| K.NNPVNNDISPCLR.S   | Y    | 47.74  | 1465.7273 | 13     | 1.2 | 733.8718 | 2 | 37.43 | 1        | F1:11020 | 12112021_RID_2349_DP1.raw | 4.7098E4 |         |         |         |
| R.LMFDRSEVYGPMQK.Y  | N    | 39.50  | 1699.8062 | 14     | 0.1 | 567.6094 | 3 | 44.88 | 1        | F1:13512 | 12112021_RID_2349_DP1.raw | 8.2001E4 |         |         |         |

total 7 peptides

TRINITY\_DN91

[back to list](#)

| [Protein Coverage](#) | [Supporting Peptides](#) |

Protein Coverage:

|     |            |     |            |             |            |            |             |            |               |
|-----|------------|-----|------------|-------------|------------|------------|-------------|------------|---------------|
| 1   | MAKGFFISK  | LG  | VVGIVLGL   | GAVATIIALS  | VVYSQEKQRA | DELANQAPSS | TSVAGTPSAT  | IAGTAQATTT | NGTIQATTVK    |
| 81  | PLEPWDHMR  | L   | PKTLMPTFYT | ISLQPFLLIPD | LYIFKGNSTV | EFQCKQPTDL | ILIHSSKLLNY | TIQGPFLVSL | TGTVVAPAI     |
| 161 | DSTWLEDKTE | YL  | VVKLKENL   | QQNENYQLHA  | SFTGELADDL | AGFYRSEYTE | GVARVVLATT  | QMQAADARKA | FPCFDEPAMK    |
| 241 | ANFSITLIHL | PTY | KALSNNP    | IKKAEVVKMP  | DGSTWVQTEF | HPTLMKSTYL | LGFIWSEFEN  | VSTIENNTLI | QIWGRPTAIR    |
| 321 | EGQGNALNA  | TWP | ILSFFEQ    | QYSVPYPLTR  | LDQVALPDFN | AGAMENWGLI | TYRESALLFD  | EKYSSIGNKE | RIVTVIAHEV    |
| 401 | AHQWFGNLVT | LEW | WNLWLN     | EGFASYVEYL  | GAHEAESTWN | IRDLIVPNDV | YRVMAIDALA  | SSHPLSSPAE | EINTPAQISE    |
| 481 | VFDAISYSKG | AAV | IRMLAEF    | LTDVAVFREGL | QTYFETYQYG | NTVCDDLWEQ | LQKAVSKKNV  | YLPSTVKTIM | DRWTLQMGFP    |
| 561 | VLTVDTSKGI | ITQ | KHLLDP     | ESPVERPSQF  | NYVWIVPVSW | LSKGKEAEMY | WLTDILAENA  | NFSTSTDPAQ | WLLNVNVTG     |
| 641 | YFRVNYDLGN | WQR | LMNQLE     | DLQTIPVLNR  | AQIIDDAFNL | ARAKHVGTDL | ALNTRYLAQ   | ERDYLWDAA  | LDNLDYFR      |
| 721 | FDRSEVYGPM | QK  | YIRKQVTP   | LFDHFRNLTH  | NWTQIPDGLM | NQYNQILAIR | TACSHGVPGC  | NELASSWFEA | WNNPNVNDI     |
| 801 | SPNLRSAVYC | SAI | RGSLED     | WDFAWKMFQ   | APVISEADKL | RSALTCSQTP | WILQRYLQYT  | LDPSMIR    | RQDAMSTINSIAS |
| 881 | NVVGQSLAWD | FVR | MNWKTLF    | QQFGRSSFSF  | SSLIQSVTQR | FASPFELQQL | EQFKADNADV  | GFGSATRALE | QALERTKANI    |
| 961 | KWVAENKALV | LKW | FQDNS      |             |            |            |             |            |               |

Supporting Peptides:

| Peptide | Uniq | -10lgP | Mass | Length | ppm | m/z | z | RT | Fraction | Scan | Source File | Area F1 | Area F2 | Area F3 | Area F4 |
|---------|------|--------|------|--------|-----|-----|---|----|----------|------|-------------|---------|---------|---------|---------|
|---------|------|--------|------|--------|-----|-----|---|----|----------|------|-------------|---------|---------|---------|---------|

| Peptide            | Uniq | -10lgP | Mass      | Length | ppm | m/z      | z | RT    | Fraction | Scan     | Source File               | Area F1  | Area F2 | Area F3 | Area F4 |
|--------------------|------|--------|-----------|--------|-----|----------|---|-------|----------|----------|---------------------------|----------|---------|---------|---------|
| R.AQIIDDAFNLAR.A   | N    | 93.46  | 1345.6990 | 12     | 0.6 | 673.8572 | 2 | 54.45 | 1        | F1:16660 | 12112021_RID_2349_DP1.raw | 1.3295E6 |         |         |         |
| R.VNYDLGNWQR.L     | Y    | 60.42  | 1263.5996 | 10     | 1.0 | 632.8077 | 2 | 44.31 | 1        | F1:13320 | 12112021_RID_2349_DP1.raw | 6.6887E4 |         |         |         |
| R.YLQYTLDPSMIR.R   | Y    | 59.84  | 1498.7490 | 12     | 0.1 | 750.3818 | 2 | 54.59 | 1        | F1:16715 | 12112021_RID_2349_DP1.raw | 2.8801E5 |         |         |         |
| K.ADNADVGFSGSATR.A | N    | 56.38  | 1279.5792 | 13     | 0.7 | 640.7974 | 2 | 31.66 | 1        | F1:9065  | 12112021_RID_2349_DP1.raw | 7.2844E4 |         |         |         |
| K.TLFQQFGR.S       | Y    | 50.21  | 995.5189  | 8      | 0.2 | 498.7668 | 2 | 44.91 | 1        | F1:13507 | 12112021_RID_2349_DP1.raw | 1.1534E5 |         |         |         |
| K.NNPVNNDISPCLR.S  | Y    | 47.74  | 1465.7273 | 13     | 1.2 | 733.8718 | 2 | 37.43 | 1        | F1:11020 | 12112021_RID_2349_DP1.raw | 4.7098E4 |         |         |         |
| R.LMFDRSEVYGPMQK.Y | N    | 39.50  | 1699.8062 | 14     | 0.1 | 567.6094 | 3 | 44.88 | 1        | F1:13512 | 12112021_RID_2349_DP1.raw | 8.2001E4 |         |         |         |

total 7 peptides

ETE57948.1

[back to list](#)

| [Protein Coverage](#) | [Supporting Peptides](#) |

Protein Coverage:

|     |                                |                   |                  |                      |            |                      |
|-----|--------------------------------|-------------------|------------------|----------------------|------------|----------------------|
| 1   | MCKAGFAGDDAPRAVFPSIVGRPRHQGV   | MVGMGQKDSYVGDEAQS | KRGILTLKYPIEHGI  | VTNWDMEKI            | WHHTFYNELR |                      |
| 81  | VAPEEHPVLLTEAPLNPKANREKMTQIMFE | TFNT              | PAMYVAIQAVLSLYAS | GRTTGIVMDS           | GDGV       | THTVPIYEGYALPHAI     |
| 161 | LRLDLAGRDLTDYLMKILTE           | RGYSFTTTAE        | REIVRDIKEK       | LCYVALDFEQ           | EMATAASSSS | LEKSYELPDGQVITIGNERF |
| 241 | RCPEALFQPSFLGMESCGI            | HETTFNSIMKC       | DVDIRKDLYA       | NTVLSGGTTMYPGIADRMQK | EITALAPSTM | KIKIIAPPER           |
| 321 | KYSVWIGGSI                     | LASLSTFQQM        | WISKQ            | EYDES                | GPSIVHRKCF |                      |

Supporting Peptides:

| Peptide                            | Uniq | -10lgP | Mass      | Length | ppm  | m/z       | z | RT    | Fraction | Scan     | Source File               | Area   |
|------------------------------------|------|--------|-----------|--------|------|-----------|---|-------|----------|----------|---------------------------|--------|
| R.GYSFTTTAER.E                     | Y    | 72.34  | 1131.5197 | 10     | 1.1  | 566.7677  | 2 | 33.52 | 2        | F2:8772  | 12112021_RID_2349_DP2.raw |        |
| K.SYELPDGQVITIGNER.F               | Y    | 71.69  | 1789.8846 | 16     | 0.3  | 895.9499  | 2 | 53.88 | 2        | F2:15567 | 12112021_RID_2349_DP2.raw |        |
| K.DSYVGDEAQS.K                     | Y    | 67.44  | 1197.5149 | 11     | 1.1  | 599.7654  | 2 | 23.86 | 2        | F2:5370  | 12112021_RID_2349_DP2.raw | 2.1509 |
| R.VAPEEHPVLLTEAPLNPK.A             | Y    | 63.91  | 1953.0570 | 18     | 0.6  | 977.5364  | 2 | 45.29 | 2        | F2:12822 | 12112021_RID_2349_DP2.raw |        |
| K.AGFAGDDAPR.A                     | Y    | 60.62  | 975.4410  | 10     | 0.5  | 488.7280  | 2 | 26.11 | 1        | F1:7167  | 12112021_RID_2349_DP1.raw | 3.3593 |
| K.EITALAPSTM.K                     | Y    | 52.44  | 1160.6111 | 11     | 0.0  | 581.3128  | 2 | 38.85 | 2        | F2:10632 | 12112021_RID_2349_DP2.raw |        |
| K.DSYVGDEAQS.K                     | Y    | 50.46  | 1353.6160 | 12     | 0.4  | 677.8156  | 2 | 20.64 | 2        | F2:4244  | 12112021_RID_2349_DP2.raw |        |
| K.EITALAPSTM(+15.99).K             | Y    | 47.42  | 1176.6060 | 11     | 0.9  | 589.3108  | 2 | 32.91 | 2        | F2:8537  | 12112021_RID_2349_DP2.raw |        |
| R.AVFPSIVGRPR.H                    | Y    | 44.25  | 1197.6981 | 11     | 1.0  | 599.8569  | 2 | 40.62 | 2        | F2:11273 | 12112021_RID_2349_DP2.raw |        |
| K.DLYANTVLSGGTTM(+15.99).YPGIADR.M | Y    | 41.30  | 2230.0576 | 21     | -0.2 | 1116.0359 | 2 | 56.05 | 2        | F2:16292 | 12112021_RID_2349_DP2.raw |        |

JAC96363.1

[back to list](#)

| [Protein Coverage](#) | [Supporting Peptides](#) |

Protein Coverage:

|     |                     |                                |                                  |                      |            |            |            |  |
|-----|---------------------|--------------------------------|----------------------------------|----------------------|------------|------------|------------|--|
| 1   | MEEIEIALVI          | DNGSGMCKAGFAGDDAPRAVFPSIVGRPRH | QGV                              | MVGMGQK              | DSYVGDEAQS | KRGILTLKYP | IEHGIVTNWD |  |
| 81  | DMEKIWHHTFYNELR     | VAPEEHPVLLTEAPLNPKANREKMT      | QIMFET                           | FNTPAMYVAIQAVLSLYAS  | GRTTGIVMDS | GDGV       |            |  |
| 161 | HTVPIYEGYALPHAILRDL | AGRDLTDYLMKILTERGYSFTTTAEREIVR | DIKEK                            | LCYVALDFEQ           | EMATAASSSS | SLEKSY     |            |  |
| 241 | ELPDGQVITIGNER      | FRCP                           | EALFQPSFLGMESCGIHETTFNSIMKCDVDIR | KDLYANTVLSGGTTMYPGIA | DRMQK      | EITAL      |            |  |
| 321 | APSTM               | IKIIAPPERKYSVWIGGSILASLS       | TFQQMWISKQ                       | EYDESGPSIV           | HRKCF      |            |            |  |

Supporting Peptides:

| Peptide | Uniq | -10lgP | Mass | Length | ppm | m/z | z | RT | Fraction | Scan | Source File | Area |
|---------|------|--------|------|--------|-----|-----|---|----|----------|------|-------------|------|
|---------|------|--------|------|--------|-----|-----|---|----|----------|------|-------------|------|

8/2/22, 12:12 PM

proteins

| Peptide                            | Uniq | -10lgP | Mass      | Length | ppm  | m/z       | z | RT    | Fraction | Scan     | Source File               | Area   |
|------------------------------------|------|--------|-----------|--------|------|-----------|---|-------|----------|----------|---------------------------|--------|
| R.GYSFTTTAER.E                     | Y    | 72.34  | 1131.5197 | 10     | 1.1  | 566.7677  | 2 | 33.52 | 2        | F2:8772  | 12112021_RID_2349_DP2.raw |        |
| K.SYELPDGQVITIGNER.F               | Y    | 71.69  | 1789.8846 | 16     | 0.3  | 895.9499  | 2 | 53.88 | 2        | F2:15567 | 12112021_RID_2349_DP2.raw |        |
| K.DSYVGDEAQS.K                     | Y    | 67.44  | 1197.5149 | 11     | 1.1  | 599.7654  | 2 | 23.86 | 2        | F2:5370  | 12112021_RID_2349_DP2.raw | 2.1509 |
| R.VAPEEHPVLLTEAPLNPK.A             | Y    | 63.91  | 1953.0570 | 18     | 0.6  | 977.5364  | 2 | 45.29 | 2        | F2:12822 | 12112021_RID_2349_DP2.raw |        |
| K.AGFAGDDAPR.A                     | Y    | 60.62  | 975.4410  | 10     | 0.5  | 488.7280  | 2 | 26.11 | 1        | F1:7167  | 12112021_RID_2349_DP1.raw | 3.3593 |
| K.EITALAPSTMK.I                    | Y    | 52.44  | 1160.6111 | 11     | 0.0  | 581.3128  | 2 | 38.85 | 2        | F2:10632 | 12112021_RID_2349_DP2.raw |        |
| K.DSYVGDEAQS.K                     | Y    | 50.46  | 1353.6160 | 12     | 0.4  | 677.8156  | 2 | 20.64 | 2        | F2:4244  | 12112021_RID_2349_DP2.raw |        |
| K.EITALAPSTM(+15.99).K.I           | Y    | 47.42  | 1176.6060 | 11     | 0.9  | 589.3108  | 2 | 32.91 | 2        | F2:8537  | 12112021_RID_2349_DP2.raw |        |
| R.AVFPSIVGRPR.H                    | Y    | 44.25  | 1197.6981 | 11     | 1.0  | 599.8569  | 2 | 40.62 | 2        | F2:11273 | 12112021_RID_2349_DP2.raw |        |
| K.DLYANTVLSGGTTM(+15.99).YPGIADR.M | Y    | 41.30  | 2230.0576 | 21     | -0.2 | 1116.0359 | 2 | 56.05 | 2        | F2:16292 | 12112021_RID_2349_DP2.raw |        |

JAA97900.1  
[back to list](#)

[Protein Coverage](#) | [Supporting Peptides](#) |  
Protein Coverage:

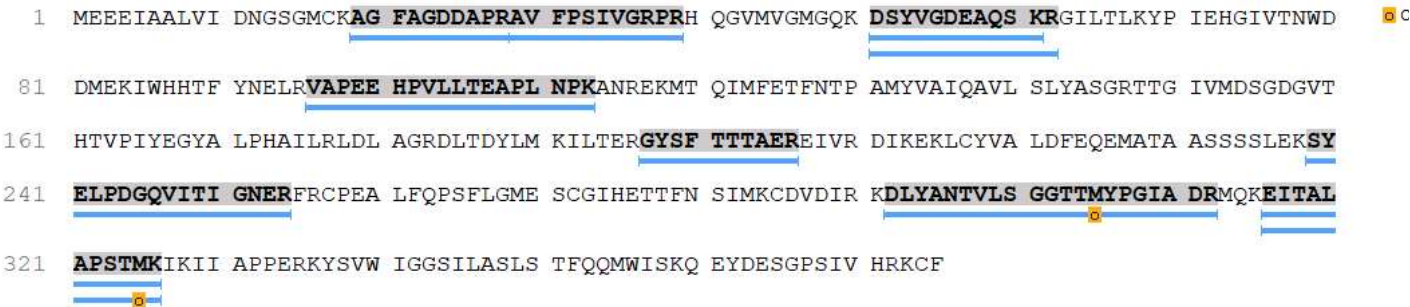

Supporting Peptides:

| Peptide                            | Uniq | -10lgP | Mass      | Length | ppm  | m/z       | z | RT    | Fraction | Scan     | Source File               | Area   |
|------------------------------------|------|--------|-----------|--------|------|-----------|---|-------|----------|----------|---------------------------|--------|
| R.GYSFTTTAER.E                     | Y    | 72.34  | 1131.5197 | 10     | 1.1  | 566.7677  | 2 | 33.52 | 2        | F2:8772  | 12112021_RID_2349_DP2.raw |        |
| K.SYELPDGQVITIGNER.F               | Y    | 71.69  | 1789.8846 | 16     | 0.3  | 895.9499  | 2 | 53.88 | 2        | F2:15567 | 12112021_RID_2349_DP2.raw |        |
| K.DSYVGDEAQS.K                     | Y    | 67.44  | 1197.5149 | 11     | 1.1  | 599.7654  | 2 | 23.86 | 2        | F2:5370  | 12112021_RID_2349_DP2.raw | 2.1509 |
| R.VAPEEHPVLLTEAPLNPK.A             | Y    | 63.91  | 1953.0570 | 18     | 0.6  | 977.5364  | 2 | 45.29 | 2        | F2:12822 | 12112021_RID_2349_DP2.raw |        |
| K.AGFAGDDAPR.A                     | Y    | 60.62  | 975.4410  | 10     | 0.5  | 488.7280  | 2 | 26.11 | 1        | F1:7167  | 12112021_RID_2349_DP1.raw | 3.3593 |
| K.EITALAPSTMK.I                    | Y    | 52.44  | 1160.6111 | 11     | 0.0  | 581.3128  | 2 | 38.85 | 2        | F2:10632 | 12112021_RID_2349_DP2.raw |        |
| K.DSYVGDEAQS.K                     | Y    | 50.46  | 1353.6160 | 12     | 0.4  | 677.8156  | 2 | 20.64 | 2        | F2:4244  | 12112021_RID_2349_DP2.raw |        |
| K.EITALAPSTM(+15.99).K.I           | Y    | 47.42  | 1176.6060 | 11     | 0.9  | 589.3108  | 2 | 32.91 | 2        | F2:8537  | 12112021_RID_2349_DP2.raw |        |
| R.AVFPSIVGRPR.H                    | Y    | 44.25  | 1197.6981 | 11     | 1.0  | 599.8569  | 2 | 40.62 | 2        | F2:11273 | 12112021_RID_2349_DP2.raw |        |
| K.DLYANTVLSGGTTM(+15.99).YPGIADR.M | Y    | 41.30  | 2230.0576 | 21     | -0.2 | 1116.0359 | 2 | 56.05 | 2        | F2:16292 | 12112021_RID_2349_DP2.raw |        |

LAA21099.1  
[back to list](#)

[Protein Coverage](#) | [Supporting Peptides](#) |  
Protein Coverage:

1 MEEIEAALVI DNGSGMCKAG FAGDDAPRAV FPSIVGRPRH QGVMVGMGQK DSYVGDEAQS KR GILTLKYP IEHGIVTNWD

81 DMEKIWHHTF YNELRVAPEE HPVLLTEAPL NPKANREKMT QIMFETFNTP AMYVAIQAVL SLYASGRTTG IVMDSGDGV

161 HTVPIYEGYA LPHAILRLDL AGRDLTDYLM KILTERGYSF TTTAEREIVR DIKEKLCYVA LDFEQEMATA ASSSSLEKSY

241 ELPDGQVITI GNERFRCPEA LFQPSFLGME SCGIHETTFN SIMKCDVDIR KDLYANTVLS GGTMYPGIA DRMQKEITAL

321 APSTMIKII APPERKYSVW IGGSILASLS TFQQMWISKQ EYDESGPSIV HRKCF

Supporting Peptides:

| Peptide                            | Uniq | -10lgP | Mass      | Length | ppm  | m/z       | z | RT    | Fraction | Scan     | Source File               | Area   |
|------------------------------------|------|--------|-----------|--------|------|-----------|---|-------|----------|----------|---------------------------|--------|
| R.GYSFTTTAER.E                     | Y    | 72.34  | 1131.5197 | 10     | 1.1  | 566.7677  | 2 | 33.52 | 2        | F2:8772  | 12112021_RID_2349_DP2.raw |        |
| K.SYELPDGQVITIGNER.F               | Y    | 71.69  | 1789.8846 | 16     | 0.3  | 895.9499  | 2 | 53.88 | 2        | F2:15567 | 12112021_RID_2349_DP2.raw |        |
| K.DSYVGDEAQS.K                     | Y    | 67.44  | 1197.5149 | 11     | 1.1  | 599.7654  | 2 | 23.86 | 2        | F2:5370  | 12112021_RID_2349_DP2.raw | 2.1509 |
| R.VAPEEHPVLLTEAPLNPK.A             | Y    | 63.91  | 1953.0570 | 18     | 0.6  | 977.5364  | 2 | 45.29 | 2        | F2:12822 | 12112021_RID_2349_DP2.raw |        |
| K.AGFAGDDAPR.A                     | Y    | 60.62  | 975.4410  | 10     | 0.5  | 488.7280  | 2 | 26.11 | 1        | F1:7167  | 12112021_RID_2349_DP1.raw | 3.3593 |
| K.EITALAPSTMI.I                    | Y    | 52.44  | 1160.6111 | 11     | 0.0  | 581.3128  | 2 | 38.85 | 2        | F2:10632 | 12112021_RID_2349_DP2.raw |        |
| K.DSYVGDEAQS.KR.G                  | Y    | 50.46  | 1353.6160 | 12     | 0.4  | 677.8156  | 2 | 20.64 | 2        | F2:4244  | 12112021_RID_2349_DP2.raw |        |
| K.EITALAPSTM(+15.99).K.I           | Y    | 47.42  | 1176.6060 | 11     | 0.9  | 589.3108  | 2 | 32.91 | 2        | F2:8537  | 12112021_RID_2349_DP2.raw |        |
| R.AVFPSIVGRPR.H                    | Y    | 44.25  | 1197.6981 | 11     | 1.0  | 599.8569  | 2 | 40.62 | 2        | F2:11273 | 12112021_RID_2349_DP2.raw |        |
| K.DLYANTVLSGGTTM(+15.99).YPGIADR.M | Y    | 41.30  | 2230.0576 | 21     | -0.2 | 1116.0359 | 2 | 56.05 | 2        | F2:16292 | 12112021_RID_2349_DP2.raw |        |

JAI10342.1  
[back to list](#)

[Protein Coverage](#) | [Supporting Peptides](#) |  
Protein Coverage:

1 MDDDIAALVV DNGSGMCKAG FAGDDAPRAV FPSIVGRPRH QGVMVGMGQK DSYVGDEAQS KR GILTLKYP IEHGIVTNWD

81 DMEKIWHHTF YNELRVAPEE HPVLLTEAPL NPKANREKMT QIMFETFNTP AMYVAIQAVL SLYASGRTTG IVMDSGDGV

161 HTVPIYEGYA LPHAILRLDL AGRDLTDYLM KILTERGYSF TTTAEREIVR DIKEKLCYVA LDFEQEMATA ASSSSLEKSY

241 ELPDGQVITI GNERFRCPEA LFQPSFLGME SCGIHETTFN SIMKCDVDIR KDLYANTVLS GGTMYPGIA DRMQKEITAL

321 APSTMIKII APPERKYSVW IGGSILASLS TFQQMWISKQ EYDESGPSIV HRKCF

Supporting Peptides:

| Peptide                            | Uniq | -10lgP | Mass      | Length | ppm  | m/z       | z | RT    | Fraction | Scan     | Source File               | Area   |
|------------------------------------|------|--------|-----------|--------|------|-----------|---|-------|----------|----------|---------------------------|--------|
| R.GYSFTTTAER.E                     | Y    | 72.34  | 1131.5197 | 10     | 1.1  | 566.7677  | 2 | 33.52 | 2        | F2:8772  | 12112021_RID_2349_DP2.raw |        |
| K.SYELPDGQVITIGNER.F               | Y    | 71.69  | 1789.8846 | 16     | 0.3  | 895.9499  | 2 | 53.88 | 2        | F2:15567 | 12112021_RID_2349_DP2.raw |        |
| K.DSYVGDEAQS.K                     | Y    | 67.44  | 1197.5149 | 11     | 1.1  | 599.7654  | 2 | 23.86 | 2        | F2:5370  | 12112021_RID_2349_DP2.raw | 2.1509 |
| R.VAPEEHPVLLTEAPLNPK.A             | Y    | 63.91  | 1953.0570 | 18     | 0.6  | 977.5364  | 2 | 45.29 | 2        | F2:12822 | 12112021_RID_2349_DP2.raw |        |
| K.AGFAGDDAPR.A                     | Y    | 60.62  | 975.4410  | 10     | 0.5  | 488.7280  | 2 | 26.11 | 1        | F1:7167  | 12112021_RID_2349_DP1.raw | 3.3593 |
| K.EITALAPSTMI.I                    | Y    | 52.44  | 1160.6111 | 11     | 0.0  | 581.3128  | 2 | 38.85 | 2        | F2:10632 | 12112021_RID_2349_DP2.raw |        |
| K.DSYVGDEAQS.KR.G                  | Y    | 50.46  | 1353.6160 | 12     | 0.4  | 677.8156  | 2 | 20.64 | 2        | F2:4244  | 12112021_RID_2349_DP2.raw |        |
| K.EITALAPSTM(+15.99).K.I           | Y    | 47.42  | 1176.6060 | 11     | 0.9  | 589.3108  | 2 | 32.91 | 2        | F2:8537  | 12112021_RID_2349_DP2.raw |        |
| R.AVFPSIVGRPR.H                    | Y    | 44.25  | 1197.6981 | 11     | 1.0  | 599.8569  | 2 | 40.62 | 2        | F2:11273 | 12112021_RID_2349_DP2.raw |        |
| K.DLYANTVLSGGTTM(+15.99).YPGIADR.M | Y    | 41.30  | 2230.0576 | 21     | -0.2 | 1116.0359 | 2 | 56.05 | 2        | F2:16292 | 12112021_RID_2349_DP2.raw |        |

JAG68843.1  
[back to list](#)

Protein Coverage:

### Supporting Peptides:

| Peptide                           | Uniq | -10lgP | Mass      | Length | ppm  | m/z       | z | RT    | Fraction | Scan     | Source File               | Area   |
|-----------------------------------|------|--------|-----------|--------|------|-----------|---|-------|----------|----------|---------------------------|--------|
| R.GYSFTTTAER.E                    | Y    | 72.34  | 1131.5197 | 10     | 1.1  | 566.7677  | 2 | 33.52 | 2        | F2:8772  | 12112021_RID_2349_DP2.raw |        |
| K.SYELPDGQVITIGNER.F              | Y    | 71.69  | 1789.8846 | 16     | 0.3  | 895.9499  | 2 | 53.88 | 2        | F2:15567 | 12112021_RID_2349_DP2.raw |        |
| K.DSYVGDEAQS.K                    | Y    | 67.44  | 1197.5149 | 11     | 1.1  | 599.7654  | 2 | 23.86 | 2        | F2:5370  | 12112021_RID_2349_DP2.raw | 2.1509 |
| R.VAPEEHPVLLTEAPLNPK.A            | Y    | 63.91  | 1953.0570 | 18     | 0.6  | 977.5364  | 2 | 45.29 | 2        | F2:12822 | 12112021_RID_2349_DP2.raw |        |
| K.AGFAGDDAPR.A                    | Y    | 60.62  | 975.4410  | 10     | 0.5  | 488.7280  | 2 | 26.11 | 1        | F1:7167  | 12112021_RID_2349_DP1.raw | 3.3593 |
| K.EITALAPSTMK.I                   | Y    | 52.44  | 1160.6111 | 11     | 0.0  | 581.3128  | 2 | 38.85 | 2        | F2:10632 | 12112021_RID_2349_DP2.raw |        |
| K.DSYVGDEAQSKR.G                  | Y    | 50.46  | 1353.6160 | 12     | 0.4  | 677.8156  | 2 | 20.64 | 2        | F2:4244  | 12112021_RID_2349_DP2.raw |        |
| K.EITALAPSTM(+15.99)K.I           | Y    | 47.42  | 1176.6060 | 11     | 0.9  | 589.3108  | 2 | 32.91 | 2        | F2:8537  | 12112021_RID_2349_DP2.raw |        |
| R.AVFPSIVGRPR.H                   | Y    | 44.25  | 1197.6981 | 11     | 1.0  | 599.8569  | 2 | 40.62 | 2        | F2:11273 | 12112021_RID_2349_DP2.raw |        |
| K.DLYANTVLSGGTTM(+15.99)YPGIADR.M | Y    | 41.30  | 2230.0576 | 21     | -0.2 | 1116.0359 | 2 | 56.05 | 2        | F2:16292 | 12112021_RID_2349_DP2.raw |        |

[back to list](#)

Protein Coverage:

### Supporting Peptides:

| Peptide                 | Uniq | -10lgP | Mass      | Length | ppm | m/z      | z | RT    | Fraction | Scan     | Source File               | Area   |
|-------------------------|------|--------|-----------|--------|-----|----------|---|-------|----------|----------|---------------------------|--------|
| R.GYSFTTTAER.E          | Y    | 72.34  | 1131.5197 | 10     | 1.1 | 566.7677 | 2 | 33.52 | 2        | F2:8772  | 12112021_RID_2349_DP2.raw |        |
| K.SYELPDGQVITIGNER.F    | Y    | 71.69  | 1789.8846 | 16     | 0.3 | 895.9499 | 2 | 53.88 | 2        | F2:15567 | 12112021_RID_2349_DP2.raw |        |
| K.DSYVGDEAQSK.R         | Y    | 67.44  | 1197.5149 | 11     | 1.1 | 599.7654 | 2 | 23.86 | 2        | F2:5370  | 12112021_RID_2349_DP2.raw | 2.1509 |
| R.VAPEEHPVLLTEAPLNPK.A  | Y    | 63.91  | 1953.0570 | 18     | 0.6 | 977.5364 | 2 | 45.29 | 2        | F2:12822 | 12112021_RID_2349_DP2.raw |        |
| K.AGFAGDDAPR.A          | Y    | 60.62  | 975.4410  | 10     | 0.5 | 488.7280 | 2 | 26.11 | 1        | F1:7167  | 12112021_RID_2349_DP1.raw | 3.3593 |
| K.EITALAPSTMK.I         | Y    | 52.44  | 1160.6111 | 11     | 0.0 | 581.3128 | 2 | 38.85 | 2        | F2:10632 | 12112021_RID_2349_DP2.raw |        |
| K.DSYVGDEAQSKR.G        | Y    | 50.46  | 1353.6160 | 12     | 0.4 | 677.8156 | 2 | 20.64 | 2        | F2:4244  | 12112021_RID_2349_DP2.raw |        |
| K.EITALAPSTM(+15.99)K.I | Y    | 47.42  | 1176.6060 | 11     | 0.9 | 589.3108 | 2 | 32.91 | 2        | F2:8537  | 12112021_RID_2349_DP2.raw |        |
| R.AVFP SivGRPR.H        | Y    | 44.25  | 1197.6981 | 11     | 1.0 | 599.8569 | 2 | 40.62 | 2        | F2:11273 | 12112021_RID_2349_DP2.raw |        |

| Peptide                             | Uniq -10lgP | Mass      | Length | ppm  | m/z       | z | RT    | Fraction | Scan     | Source File               | Area |
|-------------------------------------|-------------|-----------|--------|------|-----------|---|-------|----------|----------|---------------------------|------|
| K.DLYANTVLSGGTTM(+15.99)YPGIADR.M Y | 41.30       | 2230.0576 | 21     | -0.2 | 1116.0359 | 2 | 56.05 | 2        | F2:16292 | 12112021_RID_2349_DP2.raw |      |

JAB54771.1  
[back to list](#)

[Protein Coverage](#) | [Supporting Peptides](#) |  
Protein Coverage:

|     |            |            |            |            |            |            |            |            |            |            |  |
|-----|------------|------------|------------|------------|------------|------------|------------|------------|------------|------------|--|
| 1   | MDDDIAALVV | DNGSGMCK   | AG         | FAGDDAPRAV | FPSIVGRPRH | QGVMVGMGQK | DSYVGDEAQS | KR         | GILTLKYP   | IEHGIVTNWD |  |
| 81  | DMEKIWHHTF | YNELR      | VAPEE      | HPVLLTEAPL | NPK        | ANREKMT    | QIMFETFNTP | AMVVAIQAVL | SLYASGRTTG | IVMDSGDGVT |  |
| 161 | HTVPIYEGYA | LPHAILRLDL | AGRDLTDYLM | KILTER     | GYSF       | TTTAEREIVR | DIKEKLCYVA | LDFEQEMATA | ASSSSLEKSY |            |  |
| 241 | ELPDGQVITI | GNER       | FRCPEA     | LFQPSFLGME | SCGIHETTFN | SIMKCDVDIR | KDLYANTVLS | GGTTMYPGIA | DRMQK      | EITAL      |  |
| 321 | APSTMK     | IKII       | APPERKYSVW | IGGSILASLS | TFQQMWISKQ | EYDESGPSIV | HRKCF      |            |            |            |  |

Supporting Peptides:

| Peptide                             | Uniq -10lgP | Mass      | Length    | ppm  | m/z       | z        | RT    | Fraction | Scan     | Source File               | Area                             |
|-------------------------------------|-------------|-----------|-----------|------|-----------|----------|-------|----------|----------|---------------------------|----------------------------------|
| R.GYSFTTTAER.E                      | Y           | 72.34     | 1131.5197 | 10   | 1.1       | 566.7677 | 2     | 33.52    | 2        | F2:8772                   | 12112021_RID_2349_DP2.raw        |
| K.SYELPDGQVITIGNER.F                | Y           | 71.69     | 1789.8846 | 16   | 0.3       | 895.9499 | 2     | 53.88    | 2        | F2:15567                  | 12112021_RID_2349_DP2.raw        |
| K.DSYVGDEAQS.K                      | Y           | 67.44     | 1197.5149 | 11   | 1.1       | 599.7654 | 2     | 23.86    | 2        | F2:5370                   | 12112021_RID_2349_DP2.raw 2.1509 |
| R.VAPEEHPVLLTEAPLNPK.A              | Y           | 63.91     | 1953.0570 | 18   | 0.6       | 977.5364 | 2     | 45.29    | 2        | F2:12822                  | 12112021_RID_2349_DP2.raw        |
| K.AGFAGDDAPR.A                      | Y           | 60.62     | 975.4410  | 10   | 0.5       | 488.7280 | 2     | 26.11    | 1        | F1:7167                   | 12112021_RID_2349_DP1.raw 3.3593 |
| K.EITALAPSTMK.I                     | Y           | 52.44     | 1160.6111 | 11   | 0.0       | 581.3128 | 2     | 38.85    | 2        | F2:10632                  | 12112021_RID_2349_DP2.raw        |
| K.DSYVGDEAQS.K                      | Y           | 50.46     | 1353.6160 | 12   | 0.4       | 677.8156 | 2     | 20.64    | 2        | F2:4244                   | 12112021_RID_2349_DP2.raw        |
| K.EITALAPSTM(+15.99)K.I             | Y           | 47.42     | 1176.6060 | 11   | 0.9       | 589.3108 | 2     | 32.91    | 2        | F2:8537                   | 12112021_RID_2349_DP2.raw        |
| R.AVFPSIVGRPR.H                     | Y           | 44.25     | 1197.6981 | 11   | 1.0       | 599.8569 | 2     | 40.62    | 2        | F2:11273                  | 12112021_RID_2349_DP2.raw        |
| K.DLYANTVLSGGTTM(+15.99)YPGIADR.M Y | 41.30       | 2230.0576 | 21        | -0.2 | 1116.0359 | 2        | 56.05 | 2        | F2:16292 | 12112021_RID_2349_DP2.raw |                                  |

JAA97901.1  
[back to list](#)

[Protein Coverage](#) | [Supporting Peptides](#) |  
Protein Coverage:

|     |            |            |            |            |            |            |            |            |            |            |  |
|-----|------------|------------|------------|------------|------------|------------|------------|------------|------------|------------|--|
| 1   | MDDDIAALVV | DNGSGMCK   | AG         | FAGDDAPRAV | FPSIVGRPRH | QGVMVGMGQK | DSYVGDEAQS | KR         | GILTLKYP   | IEHGIVTNWD |  |
| 81  | DMEKIWHHTF | YNELR      | VAPEE      | HPVLLTEAPL | NPK        | ANREKMT    | QIMFETFNTP | AMVVAIQAVL | SLYASGRTTG | IVMDSGDGVT |  |
| 161 | HTVPIYEGYA | LPHAILRLDL | AGRDLTDYLM | KILTER     | GYSF       | TTTAEREIVR | DIKEKLCYVA | LDFEQEMATA | ASSSSLEKSY |            |  |
| 241 | ELPDGQVITI | GNER       | FRCPEA     | LFQPSFLGME | SCGIHETTFN | SIMKCDVDIR | KDLYANTVLS | GGTTMYPGIA | DRMQK      | EITAL      |  |
| 321 | APSTMK     | IKII       | APPERKYSVW | IGGSILASLS | TFQQMWISKQ | EYDESGPSIV | HRKCF      |            |            |            |  |

Supporting Peptides:

| Peptide                | Uniq -10lgP | Mass  | Length    | ppm | m/z | z        | RT | Fraction | Scan | Source File | Area                             |
|------------------------|-------------|-------|-----------|-----|-----|----------|----|----------|------|-------------|----------------------------------|
| R.GYSFTTTAER.E         | Y           | 72.34 | 1131.5197 | 10  | 1.1 | 566.7677 | 2  | 33.52    | 2    | F2:8772     | 12112021_RID_2349_DP2.raw        |
| K.SYELPDGQVITIGNER.F   | Y           | 71.69 | 1789.8846 | 16  | 0.3 | 895.9499 | 2  | 53.88    | 2    | F2:15567    | 12112021_RID_2349_DP2.raw        |
| K.DSYVGDEAQS.K         | Y           | 67.44 | 1197.5149 | 11  | 1.1 | 599.7654 | 2  | 23.86    | 2    | F2:5370     | 12112021_RID_2349_DP2.raw 2.1509 |
| R.VAPEEHPVLLTEAPLNPK.A | Y           | 63.91 | 1953.0570 | 18  | 0.6 | 977.5364 | 2  | 45.29    | 2    | F2:12822    | 12112021_RID_2349_DP2.raw        |
| K.AGFAGDDAPR.A         | Y           | 60.62 | 975.4410  | 10  | 0.5 | 488.7280 | 2  | 26.11    | 1    | F1:7167     | 12112021_RID_2349_DP1.raw 3.3593 |
| K.EITALAPSTMK.I        | Y           | 52.44 | 1160.6111 | 11  | 0.0 | 581.3128 | 2  | 38.85    | 2    | F2:10632    | 12112021_RID_2349_DP2.raw        |

| Peptide                           | Uniq -10lgP | Mass  | Length    | ppm | m/z  | z         | RT | Fraction | Scan | Source File                        | Area |
|-----------------------------------|-------------|-------|-----------|-----|------|-----------|----|----------|------|------------------------------------|------|
| K.DSYVGDEAQSQR.G                  | Y           | 50.46 | 1353.6160 | 12  | 0.4  | 677.8156  | 2  | 20.64    | 2    | F2:4244 12112021_RID_2349_DP2.raw  |      |
| K.EITALAPSTM(+15.99)K.I           | Y           | 47.42 | 1176.6060 | 11  | 0.9  | 589.3108  | 2  | 32.91    | 2    | F2:8537 12112021_RID_2349_DP2.raw  |      |
| R.AVFPSIVGRPR.H                   | Y           | 44.25 | 1197.6981 | 11  | 1.0  | 599.8569  | 2  | 40.62    | 2    | F2:11273 12112021_RID_2349_DP2.raw |      |
| K.DLYANTVLSGGTTM(+15.99)YPGIADR.M | Y           | 41.30 | 2230.0576 | 21  | -0.2 | 1116.0359 | 2  | 56.05    | 2    | F2:16292 12112021_RID_2349_DP2.raw |      |

JAG68844.1  
[back to list](#)

| [Protein Coverage](#) | [Supporting Peptides](#) |  
Protein Coverage:

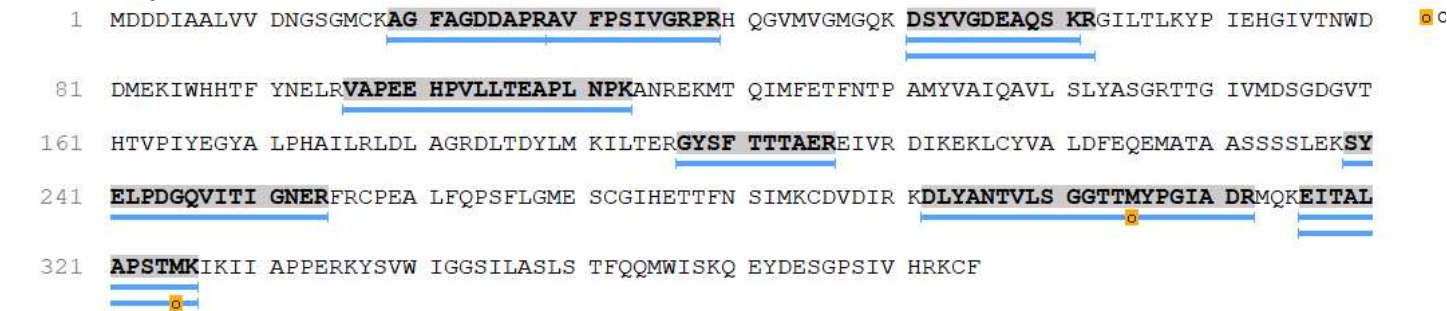

Supporting Peptides:

| Peptide                           | Uniq -10lgP | Mass  | Length    | ppm | m/z  | z         | RT | Fraction | Scan | Source File                        | Area   |
|-----------------------------------|-------------|-------|-----------|-----|------|-----------|----|----------|------|------------------------------------|--------|
| R.GYSFTTTAER.E                    | Y           | 72.34 | 1131.5197 | 10  | 1.1  | 566.7677  | 2  | 33.52    | 2    | F2:8772 12112021_RID_2349_DP2.raw  |        |
| K.SYELPDGQVITIGNER.F              | Y           | 71.69 | 1789.8846 | 16  | 0.3  | 895.9499  | 2  | 53.88    | 2    | F2:15567 12112021_RID_2349_DP2.raw |        |
| K.DSYVGDEAQSQR.G                  | Y           | 67.44 | 1197.5149 | 11  | 1.1  | 599.7654  | 2  | 23.86    | 2    | F2:5370 12112021_RID_2349_DP2.raw  | 2.1509 |
| R.VAPEEHPVLLTEAPLNPK.A            | Y           | 63.91 | 1953.0570 | 18  | 0.6  | 977.5364  | 2  | 45.29    | 2    | F2:12822 12112021_RID_2349_DP2.raw |        |
| K.AGFAGDDAPRA.A                   | Y           | 60.62 | 975.4410  | 10  | 0.5  | 488.7280  | 2  | 26.11    | 1    | F1:7167 12112021_RID_2349_DP1.raw  | 3.3593 |
| K.EITALAPSTMIK.I                  | Y           | 52.44 | 1160.6111 | 11  | 0.0  | 581.3128  | 2  | 38.85    | 2    | F2:10632 12112021_RID_2349_DP2.raw |        |
| K.DSYVGDEAQSQR.G                  | Y           | 50.46 | 1353.6160 | 12  | 0.4  | 677.8156  | 2  | 20.64    | 2    | F2:4244 12112021_RID_2349_DP2.raw  |        |
| K.EITALAPSTM(+15.99)K.I           | Y           | 47.42 | 1176.6060 | 11  | 0.9  | 589.3108  | 2  | 32.91    | 2    | F2:8537 12112021_RID_2349_DP2.raw  |        |
| R.AVFPSIVGRPR.H                   | Y           | 44.25 | 1197.6981 | 11  | 1.0  | 599.8569  | 2  | 40.62    | 2    | F2:11273 12112021_RID_2349_DP2.raw |        |
| K.DLYANTVLSGGTTM(+15.99)YPGIADR.M | Y           | 41.30 | 2230.0576 | 21  | -0.2 | 1116.0359 | 2  | 56.05    | 2    | F2:16292 12112021_RID_2349_DP2.raw |        |

LAA21098.1  
[back to list](#)

| [Protein Coverage](#) | [Supporting Peptides](#) |  
Protein Coverage:

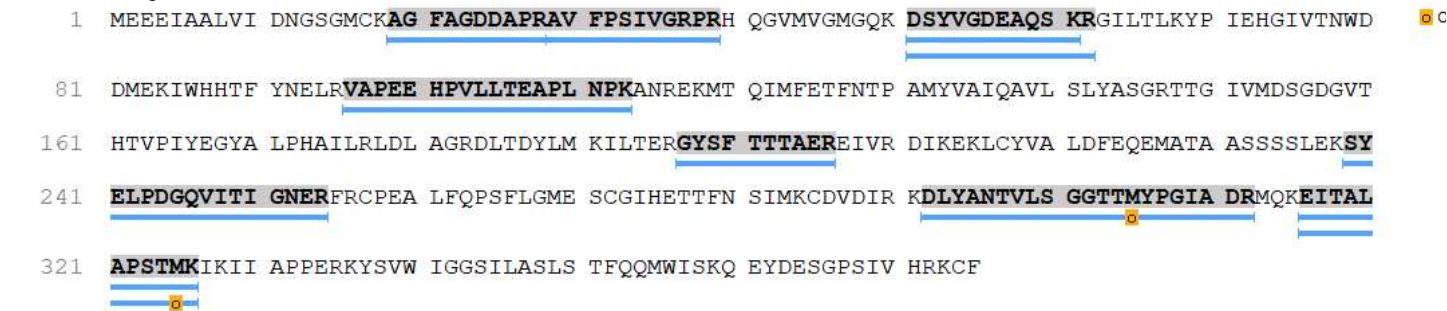

Supporting Peptides:

| Peptide              | Uniq -10lgP | Mass  | Length    | ppm | m/z | z        | RT | Fraction | Scan | Source File                        | Area   |
|----------------------|-------------|-------|-----------|-----|-----|----------|----|----------|------|------------------------------------|--------|
| R.GYSFTTTAER.E       | Y           | 72.34 | 1131.5197 | 10  | 1.1 | 566.7677 | 2  | 33.52    | 2    | F2:8772 12112021_RID_2349_DP2.raw  |        |
| K.SYELPDGQVITIGNER.F | Y           | 71.69 | 1789.8846 | 16  | 0.3 | 895.9499 | 2  | 53.88    | 2    | F2:15567 12112021_RID_2349_DP2.raw |        |
| K.DSYVGDEAQSQR.G     | Y           | 67.44 | 1197.5149 | 11  | 1.1 | 599.7654 | 2  | 23.86    | 2    | F2:5370 12112021_RID_2349_DP2.raw  | 2.1509 |

| Peptide                           | Uniq | -10lgP | Mass      | Length | ppm  | m/z       | z | RT    | Fraction | Scan     | Source File               | Area   |
|-----------------------------------|------|--------|-----------|--------|------|-----------|---|-------|----------|----------|---------------------------|--------|
| R.VAPEEHPVLLTEAPLNPK.A            | Y    | 63.91  | 1953.0570 | 18     | 0.6  | 977.5364  | 2 | 45.29 | 2        | F2:12822 | 12112021_RID_2349_DP2.raw |        |
| K.AGFAGDDAPR.A                    | Y    | 60.62  | 975.4410  | 10     | 0.5  | 488.7280  | 2 | 26.11 | 1        | F1:7167  | 12112021_RID_2349_DP1.raw | 3.3593 |
| K.EITALAPSTMK.I                   | Y    | 52.44  | 1160.6111 | 11     | 0.0  | 581.3128  | 2 | 38.85 | 2        | F2:10632 | 12112021_RID_2349_DP2.raw |        |
| K.DSYVGDEAQSQR.G                  | Y    | 50.46  | 1353.6160 | 12     | 0.4  | 677.8156  | 2 | 20.64 | 2        | F2:4244  | 12112021_RID_2349_DP2.raw |        |
| K.EITALAPSTM(+15.99)K.I           | Y    | 47.42  | 1176.6060 | 11     | 0.9  | 589.3108  | 2 | 32.91 | 2        | F2:8537  | 12112021_RID_2349_DP2.raw |        |
| R.AVFPSIVGRPR.H                   | Y    | 44.25  | 1197.6981 | 11     | 1.0  | 599.8569  | 2 | 40.62 | 2        | F2:11273 | 12112021_RID_2349_DP2.raw |        |
| K.DLYANTVLSGGTTM(+15.99)YPGIADR.M | Y    | 41.30  | 2230.0576 | 21     | -0.2 | 1116.0359 | 2 | 56.05 | 2        | F2:16292 | 12112021_RID_2349_DP2.raw |        |

JAV51374.1

[back to list](#)

| [Protein Coverage](#) | [Supporting Peptides](#) |

Protein Coverage:

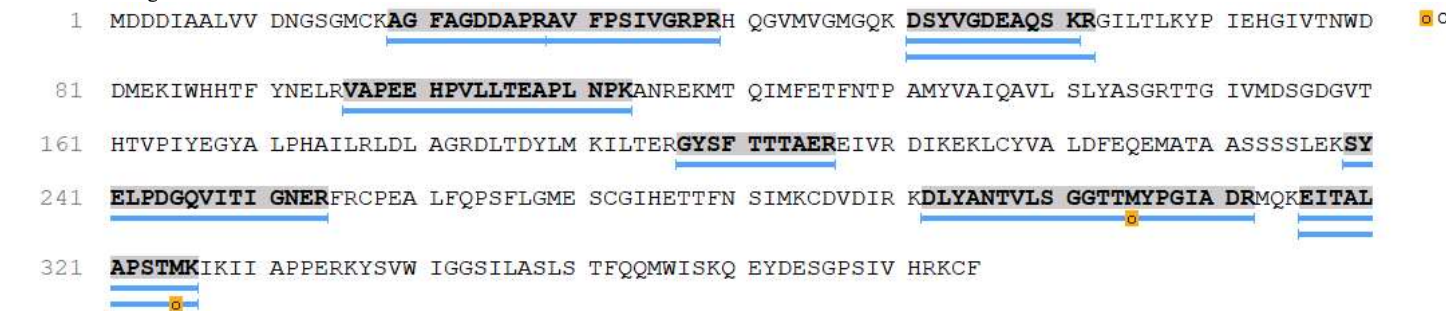

Supporting Peptides:

| Peptide                           | Uniq | -10lgP | Mass      | Length | ppm  | m/z       | z | RT    | Fraction | Scan     | Source File               | Area   |
|-----------------------------------|------|--------|-----------|--------|------|-----------|---|-------|----------|----------|---------------------------|--------|
| R.GYSFTTTAER.E                    | Y    | 72.34  | 1131.5197 | 10     | 1.1  | 566.7677  | 2 | 33.52 | 2        | F2:8772  | 12112021_RID_2349_DP2.raw |        |
| K.SYELPDGQVITIGNER.F              | Y    | 71.69  | 1789.8846 | 16     | 0.3  | 895.9499  | 2 | 53.88 | 2        | F2:15567 | 12112021_RID_2349_DP2.raw |        |
| K.DSYVGDEAQSQR.R                  | Y    | 67.44  | 1197.5149 | 11     | 1.1  | 599.7654  | 2 | 23.86 | 2        | F2:5370  | 12112021_RID_2349_DP2.raw | 2.1509 |
| R.VAPEEHPVLLTEAPLNPK.A            | Y    | 63.91  | 1953.0570 | 18     | 0.6  | 977.5364  | 2 | 45.29 | 2        | F2:12822 | 12112021_RID_2349_DP2.raw |        |
| K.AGFAGDDAPR.A                    | Y    | 60.62  | 975.4410  | 10     | 0.5  | 488.7280  | 2 | 26.11 | 1        | F1:7167  | 12112021_RID_2349_DP1.raw | 3.3593 |
| K.EITALAPSTMK.I                   | Y    | 52.44  | 1160.6111 | 11     | 0.0  | 581.3128  | 2 | 38.85 | 2        | F2:10632 | 12112021_RID_2349_DP2.raw |        |
| K.DSYVGDEAQSQR.G                  | Y    | 50.46  | 1353.6160 | 12     | 0.4  | 677.8156  | 2 | 20.64 | 2        | F2:4244  | 12112021_RID_2349_DP2.raw |        |
| K.EITALAPSTM(+15.99)K.I           | Y    | 47.42  | 1176.6060 | 11     | 0.9  | 589.3108  | 2 | 32.91 | 2        | F2:8537  | 12112021_RID_2349_DP2.raw |        |
| R.AVFPSIVGRPR.H                   | Y    | 44.25  | 1197.6981 | 11     | 1.0  | 599.8569  | 2 | 40.62 | 2        | F2:11273 | 12112021_RID_2349_DP2.raw |        |
| K.DLYANTVLSGGTTM(+15.99)YPGIADR.M | Y    | 41.30  | 2230.0576 | 21     | -0.2 | 1116.0359 | 2 | 56.05 | 2        | F2:16292 | 12112021_RID_2349_DP2.raw |        |

JAG47580.1

[back to list](#)

| [Protein Coverage](#) | [Supporting Peptides](#) |

Protein Coverage:

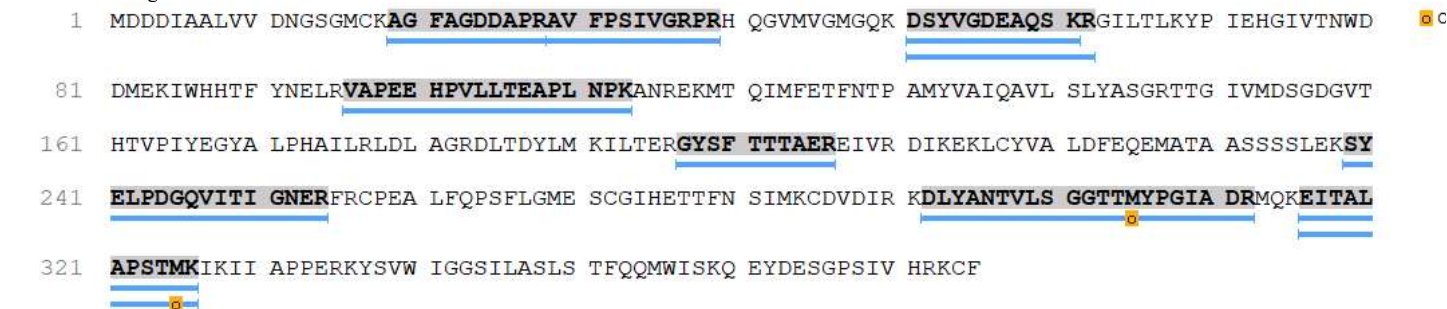

Supporting Peptides:

| Peptide | Uniq | -10lgP | Mass | Length | ppm | m/z | z | RT | Fraction | Scan | Source File | Area |
|---------|------|--------|------|--------|-----|-----|---|----|----------|------|-------------|------|
|---------|------|--------|------|--------|-----|-----|---|----|----------|------|-------------|------|

8/2/22, 12:12 PM

proteins

| Peptide                             | Uniq | -10lgP | Mass      | Length | ppm  | m/z       | z | RT    | Fraction | Scan     | Source File               | Area   |
|-------------------------------------|------|--------|-----------|--------|------|-----------|---|-------|----------|----------|---------------------------|--------|
| R.GYSFTTTAER.E                      | Y    | 72.34  | 1131.5197 | 10     | 1.1  | 566.7677  | 2 | 33.52 | 2        | F2:8772  | 12112021_RID_2349_DP2.raw |        |
| K.SYELPDGQVITIGNER.F                | Y    | 71.69  | 1789.8846 | 16     | 0.3  | 895.9499  | 2 | 53.88 | 2        | F2:15567 | 12112021_RID_2349_DP2.raw |        |
| K.DSYVGDEAQS.K                      | Y    | 67.44  | 1197.5149 | 11     | 1.1  | 599.7654  | 2 | 23.86 | 2        | F2:5370  | 12112021_RID_2349_DP2.raw | 2.1509 |
| R.VAPEEHPVLLTEAPLNPK.A              | Y    | 63.91  | 1953.0570 | 18     | 0.6  | 977.5364  | 2 | 45.29 | 2        | F2:12822 | 12112021_RID_2349_DP2.raw |        |
| K.AGFAGDDAPR.A                      | Y    | 60.62  | 975.4410  | 10     | 0.5  | 488.7280  | 2 | 26.11 | 1        | F1:7167  | 12112021_RID_2349_DP1.raw | 3.3593 |
| K.EITALAPSTMK.I                     | Y    | 52.44  | 1160.6111 | 11     | 0.0  | 581.3128  | 2 | 38.85 | 2        | F2:10632 | 12112021_RID_2349_DP2.raw |        |
| K.DSYVGDEAQS.K                      | Y    | 50.46  | 1353.6160 | 12     | 0.4  | 677.8156  | 2 | 20.64 | 2        | F2:4244  | 12112021_RID_2349_DP2.raw |        |
| K.EITALAPSTM(+15.99).K.I            | Y    | 47.42  | 1176.6060 | 11     | 0.9  | 589.3108  | 2 | 32.91 | 2        | F2:8537  | 12112021_RID_2349_DP2.raw |        |
| R.AVFPSIVGRPR.H                     | Y    | 44.25  | 1197.6981 | 11     | 1.0  | 599.8569  | 2 | 40.62 | 2        | F2:11273 | 12112021_RID_2349_DP2.raw |        |
| K.DLYANTVLSGGTTM(+15.99).Y.PGIADR.M | Y    | 41.30  | 2230.0576 | 21     | -0.2 | 1116.0359 | 2 | 56.05 | 2        | F2:16292 | 12112021_RID_2349_DP2.raw |        |

AFJ49303.1  
[back to list](#)

[Protein Coverage](#) | [Supporting Peptides](#) |  
Protein Coverage:



Supporting Peptides:

| Peptide                             | Uniq | -10lgP | Mass      | Length | ppm  | m/z       | z | RT    | Fraction | Scan     | Source File               | Area   |
|-------------------------------------|------|--------|-----------|--------|------|-----------|---|-------|----------|----------|---------------------------|--------|
| R.GYSFTTTAER.E                      | Y    | 72.34  | 1131.5197 | 10     | 1.1  | 566.7677  | 2 | 33.52 | 2        | F2:8772  | 12112021_RID_2349_DP2.raw |        |
| K.SYELPDGQVITIGNER.F                | Y    | 71.69  | 1789.8846 | 16     | 0.3  | 895.9499  | 2 | 53.88 | 2        | F2:15567 | 12112021_RID_2349_DP2.raw |        |
| K.DSYVGDEAQS.K                      | Y    | 67.44  | 1197.5149 | 11     | 1.1  | 599.7654  | 2 | 23.86 | 2        | F2:5370  | 12112021_RID_2349_DP2.raw | 2.1509 |
| R.VAPEEHPVLLTEAPLNPK.A              | Y    | 63.91  | 1953.0570 | 18     | 0.6  | 977.5364  | 2 | 45.29 | 2        | F2:12822 | 12112021_RID_2349_DP2.raw |        |
| K.AGFAGDDAPR.A                      | Y    | 60.62  | 975.4410  | 10     | 0.5  | 488.7280  | 2 | 26.11 | 1        | F1:7167  | 12112021_RID_2349_DP1.raw | 3.3593 |
| K.EITALAPSTMK.I                     | Y    | 52.44  | 1160.6111 | 11     | 0.0  | 581.3128  | 2 | 38.85 | 2        | F2:10632 | 12112021_RID_2349_DP2.raw |        |
| K.DSYVGDEAQS.K                      | Y    | 50.46  | 1353.6160 | 12     | 0.4  | 677.8156  | 2 | 20.64 | 2        | F2:4244  | 12112021_RID_2349_DP2.raw |        |
| K.EITALAPSTM(+15.99).K.I            | Y    | 47.42  | 1176.6060 | 11     | 0.9  | 589.3108  | 2 | 32.91 | 2        | F2:8537  | 12112021_RID_2349_DP2.raw |        |
| R.AVFPSIVGRPR.H                     | Y    | 44.25  | 1197.6981 | 11     | 1.0  | 599.8569  | 2 | 40.62 | 2        | F2:11273 | 12112021_RID_2349_DP2.raw |        |
| K.DLYANTVLSGGTTM(+15.99).Y.PGIADR.M | Y    | 41.30  | 2230.0576 | 21     | -0.2 | 1116.0359 | 2 | 56.05 | 2        | F2:16292 | 12112021_RID_2349_DP2.raw |        |

JAI14496.1  
[back to list](#)

[Protein Coverage](#) | [Supporting Peptides](#) |  
Protein Coverage:

1 MDDDIAALVV DNGSGMCKAG FAGDDAPRAV FPSIVGRPRH QGVMVGMGQK DSYVGDEAQS KR GILTLKYP IEHGIVTNWD

81 DMEKIWHHTF YNELRVAPEE HPVLLTEAPL NPKANREKMT QIMFETFNTP AMYVAIQAVL SLYASGRTTG IVMDSGDGV

161 HTVPIYEGYA LPHAILRLDL AGRDLTDYLM KILTERGYSF TTTAEREIVR DIKEKLCYVA LDFAQEMATA ASSSSLEKSY

241 ELPDGGQVITI GNERFRCPEA LFQPSFLGME SCGIHETTFN SIMKCDVDIR KDLYANTVLS GGTMYPGIA DRMQKEITAL

321 APSTMIKII APPERKYSVW IGGSILASLS TFQQMWISKQ EYDESGPSIV HRKCF

Supporting Peptides:

| Peptide                            | Uniq | -10lgP | Mass      | Length | ppm  | m/z       | z | RT    | Fraction | Scan     | Source File               | Area   |
|------------------------------------|------|--------|-----------|--------|------|-----------|---|-------|----------|----------|---------------------------|--------|
| R.GYSFTTTAER.E                     | Y    | 72.34  | 1131.5197 | 10     | 1.1  | 566.7677  | 2 | 33.52 | 2        | F2:8772  | 12112021_RID_2349_DP2.raw |        |
| K.SYELPDGQVITIGNER.F               | Y    | 71.69  | 1789.8846 | 16     | 0.3  | 895.9499  | 2 | 53.88 | 2        | F2:15567 | 12112021_RID_2349_DP2.raw |        |
| K.DSYVGDEAQS.K                     | Y    | 67.44  | 1197.5149 | 11     | 1.1  | 599.7654  | 2 | 23.86 | 2        | F2:5370  | 12112021_RID_2349_DP2.raw | 2.1509 |
| R.VAPEEHPVLLTEAPLNPK.A             | Y    | 63.91  | 1953.0570 | 18     | 0.6  | 977.5364  | 2 | 45.29 | 2        | F2:12822 | 12112021_RID_2349_DP2.raw |        |
| K.AGFAGDDAPR.A                     | Y    | 60.62  | 975.4410  | 10     | 0.5  | 488.7280  | 2 | 26.11 | 1        | F1:7167  | 12112021_RID_2349_DP1.raw | 3.3593 |
| K.EITALAPSTMI.I                    | Y    | 52.44  | 1160.6111 | 11     | 0.0  | 581.3128  | 2 | 38.85 | 2        | F2:10632 | 12112021_RID_2349_DP2.raw |        |
| K.DSYVGDEAQS.KR.G                  | Y    | 50.46  | 1353.6160 | 12     | 0.4  | 677.8156  | 2 | 20.64 | 2        | F2:4244  | 12112021_RID_2349_DP2.raw |        |
| K.EITALAPSTM(+15.99).K.I           | Y    | 47.42  | 1176.6060 | 11     | 0.9  | 589.3108  | 2 | 32.91 | 2        | F2:8537  | 12112021_RID_2349_DP2.raw |        |
| R.AVFPSIVGRPR.H                    | Y    | 44.25  | 1197.6981 | 11     | 1.0  | 599.8569  | 2 | 40.62 | 2        | F2:11273 | 12112021_RID_2349_DP2.raw |        |
| K.DLYANTVLSGGTTM(+15.99).YPGIADR.M | Y    | 41.30  | 2230.0576 | 21     | -0.2 | 1116.0359 | 2 | 56.05 | 2        | F2:16292 | 12112021_RID_2349_DP2.raw |        |

JAI10341.1  
[back to list](#)

[Protein Coverage](#) | [Supporting Peptides](#) |  
Protein Coverage:

1 MEEEDIAALVI DNGSGMCKAG FAGDDAPRAV FPSIVGRPRH QGVMVGMGQK DSYVGDEAQS KR GILTLKYP IEHGIVTNWD

81 DMEKIWHHTF YNELRVAPEE HPVLLTEAPL NPKANREKMT QIMFETFNTP AMYVAIQAVL SLYASGRTTG IVMDSGDGV

161 HTVPIYEGYA LPHAILRLDL AGRDLTDYLM KILTERGYSF TTTAEREIVR DIKEKLCYVA LDFAQEMATA ASSSSLEKSY

241 ELPDGGQVITI GNERFRCPEA LFQPSFLGME SCGIHETTFN SIMKCDVDIR KDLYANTVLS GGTMYPGIA DRMQKEITAL

321 APSTMIKII APPERKYSVW IGGSILASLS TFQQMWISKQ EYDESGPSIV HRKCF

Supporting Peptides:

| Peptide                            | Uniq | -10lgP | Mass      | Length | ppm  | m/z       | z | RT    | Fraction | Scan     | Source File               | Area   |
|------------------------------------|------|--------|-----------|--------|------|-----------|---|-------|----------|----------|---------------------------|--------|
| R.GYSFTTTAER.E                     | Y    | 72.34  | 1131.5197 | 10     | 1.1  | 566.7677  | 2 | 33.52 | 2        | F2:8772  | 12112021_RID_2349_DP2.raw |        |
| K.SYELPDGQVITIGNER.F               | Y    | 71.69  | 1789.8846 | 16     | 0.3  | 895.9499  | 2 | 53.88 | 2        | F2:15567 | 12112021_RID_2349_DP2.raw |        |
| K.DSYVGDEAQS.K                     | Y    | 67.44  | 1197.5149 | 11     | 1.1  | 599.7654  | 2 | 23.86 | 2        | F2:5370  | 12112021_RID_2349_DP2.raw | 2.1509 |
| R.VAPEEHPVLLTEAPLNPK.A             | Y    | 63.91  | 1953.0570 | 18     | 0.6  | 977.5364  | 2 | 45.29 | 2        | F2:12822 | 12112021_RID_2349_DP2.raw |        |
| K.AGFAGDDAPR.A                     | Y    | 60.62  | 975.4410  | 10     | 0.5  | 488.7280  | 2 | 26.11 | 1        | F1:7167  | 12112021_RID_2349_DP1.raw | 3.3593 |
| K.EITALAPSTMI.I                    | Y    | 52.44  | 1160.6111 | 11     | 0.0  | 581.3128  | 2 | 38.85 | 2        | F2:10632 | 12112021_RID_2349_DP2.raw |        |
| K.DSYVGDEAQS.KR.G                  | Y    | 50.46  | 1353.6160 | 12     | 0.4  | 677.8156  | 2 | 20.64 | 2        | F2:4244  | 12112021_RID_2349_DP2.raw |        |
| K.EITALAPSTM(+15.99).K.I           | Y    | 47.42  | 1176.6060 | 11     | 0.9  | 589.3108  | 2 | 32.91 | 2        | F2:8537  | 12112021_RID_2349_DP2.raw |        |
| R.AVFPSIVGRPR.H                    | Y    | 44.25  | 1197.6981 | 11     | 1.0  | 599.8569  | 2 | 40.62 | 2        | F2:11273 | 12112021_RID_2349_DP2.raw |        |
| K.DLYANTVLSGGTTM(+15.99).YPGIADR.M | Y    | 41.30  | 2230.0576 | 21     | -0.2 | 1116.0359 | 2 | 56.05 | 2        | F2:16292 | 12112021_RID_2349_DP2.raw |        |

JAI14495.1  
[back to list](#)

[Protein Coverage](#) | [Supporting Peptides](#) |

Protein Coverage:

1

MEEIEIAALVI DNGSGMCKAG FAGDDAPRAV FPSIVGRPRH QGVMVGMGQK DSYVGDEAQS KRGILTLKYP IEHGIVTNWD

81

DMEKIWHHTF YNELRVAPEE HPVLLTEAPL NPKANREKMT QIMFETFNTF AMYVAIQAVL SLYASGRTTG IVMDSGDGVT

161

HTVPIYEGYA LPHAILRLDL AGRDLTDYLM KILTERGYSF TTTAEREIVR DIKEKLCYVA LDFAQEMATA ASSSSLEKSY

241

ELPDGQVITI GNERFRCPEA LFQPSFLGME SCGIHETTFN SIMKCDVDIR KDLYANTVLS GGTMYPGIA DRMQKEITAL

321

APSTMIKII APPERKYSVW IGGSILASLS TFQQMWISKQ EYDESGPSIV HRKCF

Supporting Peptides:

| Peptide                           | Uniq | -10lgP | Mass      | Length | ppm  | m/z       | z | RT    | Fraction | Scan     | Source File               | Area   |
|-----------------------------------|------|--------|-----------|--------|------|-----------|---|-------|----------|----------|---------------------------|--------|
| R.GYSFTTTAER.E                    | Y    | 72.34  | 1131.5197 | 10     | 1.1  | 566.7677  | 2 | 33.52 | 2        | F2:8772  | 12112021_RID_2349_DP2.raw |        |
| K.SYELPDGQVITIGNER.F              | Y    | 71.69  | 1789.8846 | 16     | 0.3  | 895.9499  | 2 | 53.88 | 2        | F2:15567 | 12112021_RID_2349_DP2.raw |        |
| K.DSYVGDEAQSK.R                   | Y    | 67.44  | 1197.5149 | 11     | 1.1  | 599.7654  | 2 | 23.86 | 2        | F2:5370  | 12112021_RID_2349_DP2.raw | 2.1509 |
| R.VAPEEHPVLLTEAPLNPK.A            | Y    | 63.91  | 1953.0570 | 18     | 0.6  | 977.5364  | 2 | 45.29 | 2        | F2:12822 | 12112021_RID_2349_DP2.raw |        |
| K.AGFAGDDAPR.A                    | Y    | 60.62  | 975.4410  | 10     | 0.5  | 488.7280  | 2 | 26.11 | 1        | F1:7167  | 12112021_RID_2349_DP1.raw | 3.3593 |
| K.EITALAPSTMK.I                   | Y    | 52.44  | 1160.6111 | 11     | 0.0  | 581.3128  | 2 | 38.85 | 2        | F2:10632 | 12112021_RID_2349_DP2.raw |        |
| K.DSYVGDEAQSKR.G                  | Y    | 50.46  | 1353.6160 | 12     | 0.4  | 677.8156  | 2 | 20.64 | 2        | F2:4244  | 12112021_RID_2349_DP2.raw |        |
| K.EITALAPSTM(+15.99)K.I           | Y    | 47.42  | 1176.6060 | 11     | 0.9  | 589.3108  | 2 | 32.91 | 2        | F2:8537  | 12112021_RID_2349_DP2.raw |        |
| R.AVFPSIVGRPR.H                   | Y    | 44.25  | 1197.6981 | 11     | 1.0  | 599.8569  | 2 | 40.62 | 2        | F2:11273 | 12112021_RID_2349_DP2.raw |        |
| K.DLYANTVLSGGTTM(+15.99)YPGIADR.M | Y    | 41.30  | 2230.0576 | 21     | -0.2 | 1116.0359 | 2 | 56.05 | 2        | F2:16292 | 12112021_RID_2349_DP2.raw |        |

JAC96364.1

[back to list](#)

[Protein Coverage](#) | [Supporting Peptides](#) |

Protein Coverage:

1

MDDDIAALVV DNGSGMCKAG FAGDDAPRAV FPSIVGRPRH QGVMVGMGQK DSYVGDEAQS KRGILTLKYP IEHGIVTNWD

81

DMEKIWHHTF YNELRVAPEE HPVLLTEAPL NPKANREKMT QIMFETFNTF AMYVAIQAVL SLYASGRTTG IVMDSGDGVT

161

HTVPIYEGYA LPHAILRLDL AGRDLTDYLM KILTERGYSF TTTAEREIVR DIKEKLCYVA LDFAQEMATA ASSSSLEKSY

241

ELPDGQVITI GNERFRCPEA LFQPSFLGME SCGIHETTFN SIMKCDVDIR KDLYANTVLS GGTMYPGIA DRMQKEITAL

321

APSTMIKII APPERKYSVW IGGSILASLS TFQQMWISKQ EYDESGPSIV HRKCF

Supporting Peptides:

| Peptide                 | Uniq | -10lgP | Mass      | Length | ppm | m/z      | z | RT    | Fraction | Scan     | Source File               | Area   |
|-------------------------|------|--------|-----------|--------|-----|----------|---|-------|----------|----------|---------------------------|--------|
| R.GYSFTTTAER.E          | Y    | 72.34  | 1131.5197 | 10     | 1.1 | 566.7677 | 2 | 33.52 | 2        | F2:8772  | 12112021_RID_2349_DP2.raw |        |
| K.SYELPDGQVITIGNER.F    | Y    | 71.69  | 1789.8846 | 16     | 0.3 | 895.9499 | 2 | 53.88 | 2        | F2:15567 | 12112021_RID_2349_DP2.raw |        |
| K.DSYVGDEAQSK.R         | Y    | 67.44  | 1197.5149 | 11     | 1.1 | 599.7654 | 2 | 23.86 | 2        | F2:5370  | 12112021_RID_2349_DP2.raw | 2.1509 |
| R.VAPEEHPVLLTEAPLNPK.A  | Y    | 63.91  | 1953.0570 | 18     | 0.6 | 977.5364 | 2 | 45.29 | 2        | F2:12822 | 12112021_RID_2349_DP2.raw |        |
| K.AGFAGDDAPR.A          | Y    | 60.62  | 975.4410  | 10     | 0.5 | 488.7280 | 2 | 26.11 | 1        | F1:7167  | 12112021_RID_2349_DP1.raw | 3.3593 |
| K.EITALAPSTMK.I         | Y    | 52.44  | 1160.6111 | 11     | 0.0 | 581.3128 | 2 | 38.85 | 2        | F2:10632 | 12112021_RID_2349_DP2.raw |        |
| K.DSYVGDEAQSKR.G        | Y    | 50.46  | 1353.6160 | 12     | 0.4 | 677.8156 | 2 | 20.64 | 2        | F2:4244  | 12112021_RID_2349_DP2.raw |        |
| K.EITALAPSTM(+15.99)K.I | Y    | 47.42  | 1176.6060 | 11     | 0.9 | 589.3108 | 2 | 32.91 | 2        | F2:8537  | 12112021_RID_2349_DP2.raw |        |
| R.AVFPSIVGRPR.H         | Y    | 44.25  | 1197.6981 | 11     | 1.0 | 599.8569 | 2 | 40.62 | 2        | F2:11273 | 12112021_RID_2349_DP2.raw |        |

| Peptide                             | Uniq -10lgP | Mass      | Length | ppm  | m/z       | z | RT    | Fraction | Scan     | Source File               | Area |
|-------------------------------------|-------------|-----------|--------|------|-----------|---|-------|----------|----------|---------------------------|------|
| K.DLYANTVLSGGTTM(+15.99)YPGIADR.M Y | 41.30       | 2230.0576 | 21     | -0.2 | 1116.0359 | 2 | 56.05 | 2        | F2:16292 | 12112021_RID_2349_DP2.raw |      |

JAG47579.1  
[back to list](#)

[Protein Coverage](#) | [Supporting Peptides](#) |  
Protein Coverage:

|     |             |            |            |            |            |            |            |            |            |            |            |
|-----|-------------|------------|------------|------------|------------|------------|------------|------------|------------|------------|------------|
| 1   | MEEETIAALVI | DNGSGMCK   | AG         | FAGDDAPRAV | FPSIVGRPRH | QGVMVGMGQK | DSYVGDEAQS | KR         | GILTLKYP   | IEHGIVTNWD |            |
| 81  | DMEKIWHHTF  | YNELR      | VAPEE      | HPVLLTEAPL | NPK        | ANREKMT    | QIMFETFNT  | P          | AMYVAIQAVL | SLYASGRTTG | IVMDSGDGVT |
| 161 | HTVPIYEGYA  | LPHAILRLDL | AGRDLTDYLM | KILTER     | GYSF       | TTTAEREIVR | DIKEKLCYVA | LD         | FEQEMATA   | ASSSSLEKSY |            |
| 241 | ELPDGQVITI  | GNER       | FRCPEA     | LFQPSFLGME | SCGIHETTFN | SIMKCDVDIR | KDLYANTVLS | GGTTMYPGIA | DRMQK      | EITAL      |            |
| 321 | APSTMK      | IKII       | APPERKYSVW | IGGSILASLS | TFQQMWISKQ | EYDESGPSIV | HRKCF      |            |            |            |            |

Supporting Peptides:

| Peptide                             | Uniq -10lgP | Mass      | Length    | ppm  | m/z       | z        | RT    | Fraction | Scan     | Source File               | Area                             |
|-------------------------------------|-------------|-----------|-----------|------|-----------|----------|-------|----------|----------|---------------------------|----------------------------------|
| R.GYSFTTTAER.E                      | Y           | 72.34     | 1131.5197 | 10   | 1.1       | 566.7677 | 2     | 33.52    | 2        | F2:8772                   | 12112021_RID_2349_DP2.raw        |
| K.SYELPDGQVITIGNER.F                | Y           | 71.69     | 1789.8846 | 16   | 0.3       | 895.9499 | 2     | 53.88    | 2        | F2:15567                  | 12112021_RID_2349_DP2.raw        |
| K.DSYVGDEAQS.K                      | Y           | 67.44     | 1197.5149 | 11   | 1.1       | 599.7654 | 2     | 23.86    | 2        | F2:5370                   | 12112021_RID_2349_DP2.raw 2.1509 |
| R.VAPEEHPVLLTEAPLNPK.A              | Y           | 63.91     | 1953.0570 | 18   | 0.6       | 977.5364 | 2     | 45.29    | 2        | F2:12822                  | 12112021_RID_2349_DP2.raw        |
| K.AGFAGDDAPR.A                      | Y           | 60.62     | 975.4410  | 10   | 0.5       | 488.7280 | 2     | 26.11    | 1        | F1:7167                   | 12112021_RID_2349_DP1.raw 3.3593 |
| K.EITALAPSTMK.I                     | Y           | 52.44     | 1160.6111 | 11   | 0.0       | 581.3128 | 2     | 38.85    | 2        | F2:10632                  | 12112021_RID_2349_DP2.raw        |
| K.DSYVGDEAQS.K                      | Y           | 50.46     | 1353.6160 | 12   | 0.4       | 677.8156 | 2     | 20.64    | 2        | F2:4244                   | 12112021_RID_2349_DP2.raw        |
| K.EITALAPSTM(+15.99)K.I             | Y           | 47.42     | 1176.6060 | 11   | 0.9       | 589.3108 | 2     | 32.91    | 2        | F2:8537                   | 12112021_RID_2349_DP2.raw        |
| R.AVFPSIVGRPR.H                     | Y           | 44.25     | 1197.6981 | 11   | 1.0       | 599.8569 | 2     | 40.62    | 2        | F2:11273                  | 12112021_RID_2349_DP2.raw        |
| K.DLYANTVLSGGTTM(+15.99)YPGIADR.M Y | 41.30       | 2230.0576 | 21        | -0.2 | 1116.0359 | 2        | 56.05 | 2        | F2:16292 | 12112021_RID_2349_DP2.raw |                                  |

JAV51372.1  
[back to list](#)

[Protein Coverage](#) | [Supporting Peptides](#) |  
Protein Coverage:

|     |             |            |            |            |            |            |            |            |            |            |            |
|-----|-------------|------------|------------|------------|------------|------------|------------|------------|------------|------------|------------|
| 1   | MEEETIAALVI | DNGSGMCK   | AG         | FAGDDAPRAV | FPSIVGRPRH | QGVMVGMGQK | DSYVGDEAQS | KR         | GILTLKYP   | IEHGIVTNWD |            |
| 81  | DMEKIWHHTF  | YNELR      | VAPEE      | HPVLLTEAPL | NPK        | ANREKMT    | QIMFETFNT  | P          | AMYVAIQAVL | SLYASGRTTG | IVMDSGDGVT |
| 161 | HTVPIYEGYA  | LPHAILRLDL | AGRDLTDYLM | KILTER     | GYSF       | TTTAEREIVR | DIKEKLCYVA | LD         | FEQEMATA   | ASSSSLEKSY |            |
| 241 | ELPDGQVITI  | GNER       | FRCPEA     | LFQPSFLGME | SCGIHETTFN | SIMKCDVDIR | KDLYANTVLS | GGTTMYPGIA | DRMQK      | EITAL      |            |
| 321 | APSTMK      | IKII       | APPERKYSVW | IGGSILASLS | TFQQMWISKQ | EYDESGPSIV | HRKCF      |            |            |            |            |

Supporting Peptides:

| Peptide                | Uniq -10lgP | Mass  | Length    | ppm | m/z | z        | RT | Fraction | Scan | Source File | Area                             |
|------------------------|-------------|-------|-----------|-----|-----|----------|----|----------|------|-------------|----------------------------------|
| R.GYSFTTTAER.E         | Y           | 72.34 | 1131.5197 | 10  | 1.1 | 566.7677 | 2  | 33.52    | 2    | F2:8772     | 12112021_RID_2349_DP2.raw        |
| K.SYELPDGQVITIGNER.F   | Y           | 71.69 | 1789.8846 | 16  | 0.3 | 895.9499 | 2  | 53.88    | 2    | F2:15567    | 12112021_RID_2349_DP2.raw        |
| K.DSYVGDEAQS.K         | Y           | 67.44 | 1197.5149 | 11  | 1.1 | 599.7654 | 2  | 23.86    | 2    | F2:5370     | 12112021_RID_2349_DP2.raw 2.1509 |
| R.VAPEEHPVLLTEAPLNPK.A | Y           | 63.91 | 1953.0570 | 18  | 0.6 | 977.5364 | 2  | 45.29    | 2    | F2:12822    | 12112021_RID_2349_DP2.raw        |
| K.AGFAGDDAPR.A         | Y           | 60.62 | 975.4410  | 10  | 0.5 | 488.7280 | 2  | 26.11    | 1    | F1:7167     | 12112021_RID_2349_DP1.raw 3.3593 |
| K.EITALAPSTMK.I        | Y           | 52.44 | 1160.6111 | 11  | 0.0 | 581.3128 | 2  | 38.85    | 2    | F2:10632    | 12112021_RID_2349_DP2.raw        |

| Peptide                           | Uniq -10lgP | Mass  | Length    | ppm | m/z  | z         | RT | Fraction | Scan | Source File                        | Area |
|-----------------------------------|-------------|-------|-----------|-----|------|-----------|----|----------|------|------------------------------------|------|
| K.DSYVGDEAQSQR.G                  | Y           | 50.46 | 1353.6160 | 12  | 0.4  | 677.8156  | 2  | 20.64    | 2    | F2:4244 12112021_RID_2349_DP2.raw  |      |
| K.EITALAPSTM(+15.99)K.I           | Y           | 47.42 | 1176.6060 | 11  | 0.9  | 589.3108  | 2  | 32.91    | 2    | F2:8537 12112021_RID_2349_DP2.raw  |      |
| R.AVFPSIVGRPR.H                   | Y           | 44.25 | 1197.6981 | 11  | 1.0  | 599.8569  | 2  | 40.62    | 2    | F2:11273 12112021_RID_2349_DP2.raw |      |
| K.DLYANTVLSGGTTM(+15.99)YPGIADR.M | Y           | 41.30 | 2230.0576 | 21  | -0.2 | 1116.0359 | 2  | 56.05    | 2    | F2:16292 12112021_RID_2349_DP2.raw |      |

AFJ49302.1  
[back to list](#)

[Protein Coverage](#) | [Supporting Peptides](#) |  
Protein Coverage:



Supporting Peptides:

| Peptide                           | Uniq -10lgP | Mass  | Length    | ppm | m/z  | z         | RT | Fraction | Scan | Source File                        | Area   |
|-----------------------------------|-------------|-------|-----------|-----|------|-----------|----|----------|------|------------------------------------|--------|
| R.GYSFTTTAER.E                    | Y           | 72.34 | 1131.5197 | 10  | 1.1  | 566.7677  | 2  | 33.52    | 2    | F2:8772 12112021_RID_2349_DP2.raw  |        |
| K.SYELPDGQVITIGNER.F              | Y           | 71.69 | 1789.8846 | 16  | 0.3  | 895.9499  | 2  | 53.88    | 2    | F2:15567 12112021_RID_2349_DP2.raw |        |
| K.DSYVGDEAQSQR.G                  | Y           | 67.44 | 1197.5149 | 11  | 1.1  | 599.7654  | 2  | 23.86    | 2    | F2:5370 12112021_RID_2349_DP2.raw  | 2.1509 |
| R.VAPEEHPVLLTEAPLNPK.A            | Y           | 63.91 | 1953.0570 | 18  | 0.6  | 977.5364  | 2  | 45.29    | 2    | F2:12822 12112021_RID_2349_DP2.raw |        |
| K.AGFAGDDAPR.A                    | Y           | 60.62 | 975.4410  | 10  | 0.5  | 488.7280  | 2  | 26.11    | 1    | F1:7167 12112021_RID_2349_DP1.raw  | 3.3593 |
| K.EITALAPSTMK.I                   | Y           | 52.44 | 1160.6111 | 11  | 0.0  | 581.3128  | 2  | 38.85    | 2    | F2:10632 12112021_RID_2349_DP2.raw |        |
| K.DSYVGDEAQSQR.G                  | Y           | 50.46 | 1353.6160 | 12  | 0.4  | 677.8156  | 2  | 20.64    | 2    | F2:4244 12112021_RID_2349_DP2.raw  |        |
| K.EITALAPSTM(+15.99)K.I           | Y           | 47.42 | 1176.6060 | 11  | 0.9  | 589.3108  | 2  | 32.91    | 2    | F2:8537 12112021_RID_2349_DP2.raw  |        |
| R.AVFPSIVGRPR.H                   | Y           | 44.25 | 1197.6981 | 11  | 1.0  | 599.8569  | 2  | 40.62    | 2    | F2:11273 12112021_RID_2349_DP2.raw |        |
| K.DLYANTVLSGGTTM(+15.99)YPGIADR.M | Y           | 41.30 | 2230.0576 | 21  | -0.2 | 1116.0359 | 2  | 56.05    | 2    | F2:16292 12112021_RID_2349_DP2.raw |        |

BAQ22177.1  
[back to list](#)

[Protein Coverage](#) | [Supporting Peptides](#) |  
Protein Coverage:

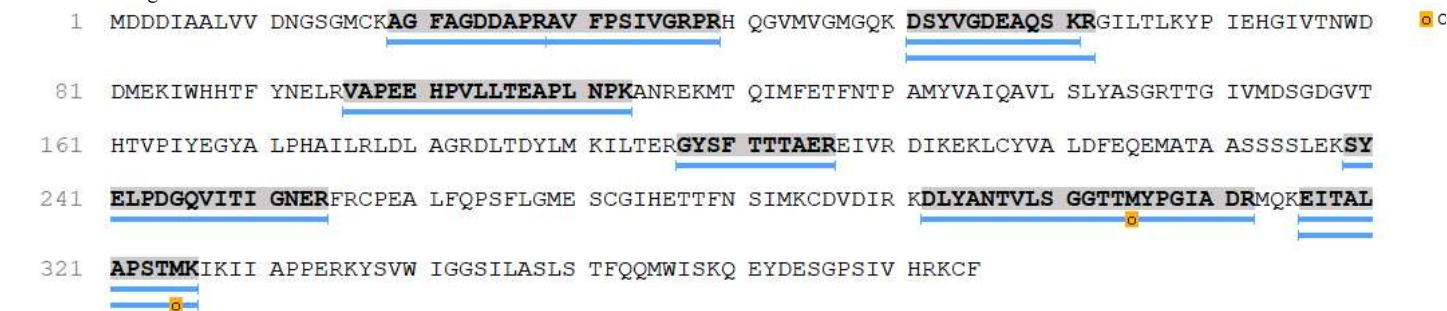

Supporting Peptides:

| Peptide              | Uniq -10lgP | Mass  | Length    | ppm | m/z | z        | RT | Fraction | Scan | Source File                        | Area   |
|----------------------|-------------|-------|-----------|-----|-----|----------|----|----------|------|------------------------------------|--------|
| R.GYSFTTTAER.E       | Y           | 72.34 | 1131.5197 | 10  | 1.1 | 566.7677 | 2  | 33.52    | 2    | F2:8772 12112021_RID_2349_DP2.raw  |        |
| K.SYELPDGQVITIGNER.F | Y           | 71.69 | 1789.8846 | 16  | 0.3 | 895.9499 | 2  | 53.88    | 2    | F2:15567 12112021_RID_2349_DP2.raw |        |
| K.DSYVGDEAQSQR.G     | Y           | 67.44 | 1197.5149 | 11  | 1.1 | 599.7654 | 2  | 23.86    | 2    | F2:5370 12112021_RID_2349_DP2.raw  | 2.1509 |

| Peptide                            | Uniq | -10lgP | Mass      | Length | ppm  | m/z       | z | RT    | Fraction | Scan     | Source File               | Area   |
|------------------------------------|------|--------|-----------|--------|------|-----------|---|-------|----------|----------|---------------------------|--------|
| R.VAPEEHPVLLTEAPLNPK.A             | Y    | 63.91  | 1953.0570 | 18     | 0.6  | 977.5364  | 2 | 45.29 | 2        | F2:12822 | 12112021_RID_2349_DP2.raw |        |
| K.AGFAGDDAPR.A                     | Y    | 60.62  | 975.4410  | 10     | 0.5  | 488.7280  | 2 | 26.11 | 1        | F1:7167  | 12112021_RID_2349_DP1.raw | 3.3593 |
| K.EITALAPSTMK.I                    | Y    | 52.44  | 1160.6111 | 11     | 0.0  | 581.3128  | 2 | 38.85 | 2        | F2:10632 | 12112021_RID_2349_DP2.raw |        |
| K.DSYVGDEAQS.KR                    | Y    | 50.46  | 1353.6160 | 12     | 0.4  | 677.8156  | 2 | 20.64 | 2        | F2:4244  | 12112021_RID_2349_DP2.raw |        |
| K.EITALAPSTM(+15.99).K.I           | Y    | 47.42  | 1176.6060 | 11     | 0.9  | 589.3108  | 2 | 32.91 | 2        | F2:8537  | 12112021_RID_2349_DP2.raw |        |
| R.AVFPSIVGRPR.H                    | Y    | 44.25  | 1197.6981 | 11     | 1.0  | 599.8569  | 2 | 40.62 | 2        | F2:11273 | 12112021_RID_2349_DP2.raw |        |
| K.DLYANTVLSGGTTM(+15.99).YPGIADR.M | Y    | 41.30  | 2230.0576 | 21     | -0.2 | 1116.0359 | 2 | 56.05 | 2        | F2:16292 | 12112021_RID_2349_DP2.raw |        |

JAG45996.1

[back to list](#)

| [Protein Coverage](#) | [Supporting Peptides](#) |

Protein Coverage:

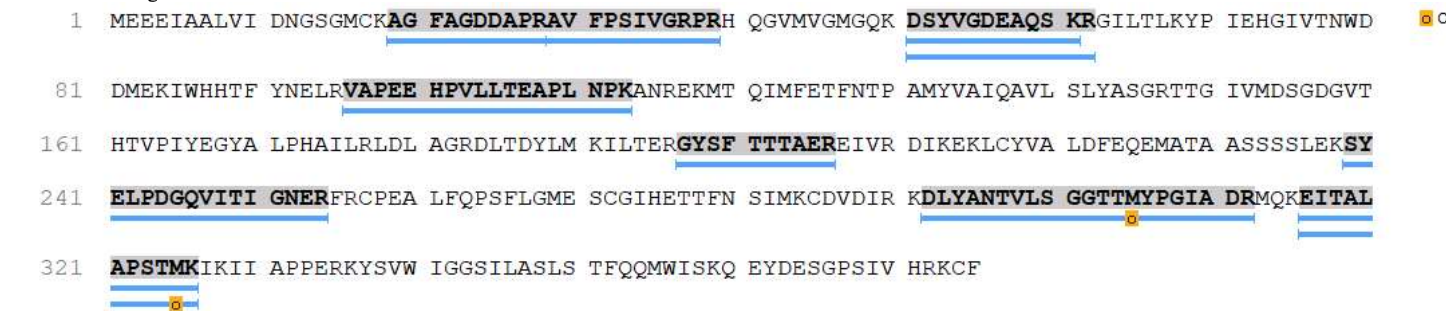

Supporting Peptides:

| Peptide                            | Uniq | -10lgP | Mass      | Length | ppm  | m/z       | z | RT    | Fraction | Scan     | Source File               | Area   |
|------------------------------------|------|--------|-----------|--------|------|-----------|---|-------|----------|----------|---------------------------|--------|
| R.GYSFTTTAER.E                     | Y    | 72.34  | 1131.5197 | 10     | 1.1  | 566.7677  | 2 | 33.52 | 2        | F2:8772  | 12112021_RID_2349_DP2.raw |        |
| K.SYELPDGQVITIGNER.F               | Y    | 71.69  | 1789.8846 | 16     | 0.3  | 895.9499  | 2 | 53.88 | 2        | F2:15567 | 12112021_RID_2349_DP2.raw |        |
| K.DSYVGDEAQS.KR                    | Y    | 67.44  | 1197.5149 | 11     | 1.1  | 599.7654  | 2 | 23.86 | 2        | F2:5370  | 12112021_RID_2349_DP2.raw | 2.1509 |
| R.VAPEEHPVLLTEAPLNPK.A             | Y    | 63.91  | 1953.0570 | 18     | 0.6  | 977.5364  | 2 | 45.29 | 2        | F2:12822 | 12112021_RID_2349_DP2.raw |        |
| K.AGFAGDDAPR.A                     | Y    | 60.62  | 975.4410  | 10     | 0.5  | 488.7280  | 2 | 26.11 | 1        | F1:7167  | 12112021_RID_2349_DP1.raw | 3.3593 |
| K.EITALAPSTMK.I                    | Y    | 52.44  | 1160.6111 | 11     | 0.0  | 581.3128  | 2 | 38.85 | 2        | F2:10632 | 12112021_RID_2349_DP2.raw |        |
| K.DSYVGDEAQS.KR                    | Y    | 50.46  | 1353.6160 | 12     | 0.4  | 677.8156  | 2 | 20.64 | 2        | F2:4244  | 12112021_RID_2349_DP2.raw |        |
| K.EITALAPSTM(+15.99).K.I           | Y    | 47.42  | 1176.6060 | 11     | 0.9  | 589.3108  | 2 | 32.91 | 2        | F2:8537  | 12112021_RID_2349_DP2.raw |        |
| R.AVFPSIVGRPR.H                    | Y    | 44.25  | 1197.6981 | 11     | 1.0  | 599.8569  | 2 | 40.62 | 2        | F2:11273 | 12112021_RID_2349_DP2.raw |        |
| K.DLYANTVLSGGTTM(+15.99).YPGIADR.M | Y    | 41.30  | 2230.0576 | 21     | -0.2 | 1116.0359 | 2 | 56.05 | 2        | F2:16292 | 12112021_RID_2349_DP2.raw |        |

JAG45999.1

[back to list](#)

| [Protein Coverage](#) | [Supporting Peptides](#) |

Protein Coverage:



Supporting Peptides:

| Peptide | Uniq | -10lgP | Mass | Length | ppm | m/z | z | RT | Fraction | Scan | Source File | Area |
|---------|------|--------|------|--------|-----|-----|---|----|----------|------|-------------|------|
|---------|------|--------|------|--------|-----|-----|---|----|----------|------|-------------|------|

8/2/22, 12:12 PM

proteins

| Peptide                             | Uniq | -10lgP | Mass      | Length | ppm  | m/z       | z | RT    | Fraction | Scan     | Source File               | Area   |
|-------------------------------------|------|--------|-----------|--------|------|-----------|---|-------|----------|----------|---------------------------|--------|
| R.GYSFTTTAER.E                      | Y    | 72.34  | 1131.5197 | 10     | 1.1  | 566.7677  | 2 | 33.52 | 2        | F2:8772  | 12112021_RID_2349_DP2.raw |        |
| K.SYELPDGQVITIGNER.F                | Y    | 71.69  | 1789.8846 | 16     | 0.3  | 895.9499  | 2 | 53.88 | 2        | F2:15567 | 12112021_RID_2349_DP2.raw |        |
| K.DSYVGDEAQS.K                      | Y    | 67.44  | 1197.5149 | 11     | 1.1  | 599.7654  | 2 | 23.86 | 2        | F2:5370  | 12112021_RID_2349_DP2.raw | 2.1509 |
| R.VAPEEHPVLLTEAPLNPK.A              | Y    | 63.91  | 1953.0570 | 18     | 0.6  | 977.5364  | 2 | 45.29 | 2        | F2:12822 | 12112021_RID_2349_DP2.raw |        |
| K.AGFAGDDAPR.A                      | Y    | 60.62  | 975.4410  | 10     | 0.5  | 488.7280  | 2 | 26.11 | 1        | F1:7167  | 12112021_RID_2349_DP1.raw | 3.3593 |
| K.EITALAPSTMK.I                     | Y    | 52.44  | 1160.6111 | 11     | 0.0  | 581.3128  | 2 | 38.85 | 2        | F2:10632 | 12112021_RID_2349_DP2.raw |        |
| K.DSYVGDEAQS.K                      | Y    | 50.46  | 1353.6160 | 12     | 0.4  | 677.8156  | 2 | 20.64 | 2        | F2:4244  | 12112021_RID_2349_DP2.raw |        |
| K.EITALAPSTM(+15.99).K.I            | Y    | 47.42  | 1176.6060 | 11     | 0.9  | 589.3108  | 2 | 32.91 | 2        | F2:8537  | 12112021_RID_2349_DP2.raw |        |
| R.AVFPSIVGRPR.H                     | Y    | 44.25  | 1197.6981 | 11     | 1.0  | 599.8569  | 2 | 40.62 | 2        | F2:11273 | 12112021_RID_2349_DP2.raw |        |
| K.DLYANTVLSGGTTM(+15.99).Y.PGIADR.M | Y    | 41.30  | 2230.0576 | 21     | -0.2 | 1116.0359 | 2 | 56.05 | 2        | F2:16292 | 12112021_RID_2349_DP2.raw |        |

JAB54395.1  
[back to list](#)

[Protein Coverage](#) | [Supporting Peptides](#) |  
Protein Coverage:



Supporting Peptides:

| Peptide                             | Uniq | -10lgP | Mass      | Length | ppm  | m/z       | z | RT    | Fraction | Scan     | Source File               | Area   |
|-------------------------------------|------|--------|-----------|--------|------|-----------|---|-------|----------|----------|---------------------------|--------|
| R.GYSFTTTAER.E                      | Y    | 72.34  | 1131.5197 | 10     | 1.1  | 566.7677  | 2 | 33.52 | 2        | F2:8772  | 12112021_RID_2349_DP2.raw |        |
| K.SYELPDGQVITIGNER.F                | Y    | 71.69  | 1789.8846 | 16     | 0.3  | 895.9499  | 2 | 53.88 | 2        | F2:15567 | 12112021_RID_2349_DP2.raw |        |
| K.DSYVGDEAQS.K                      | Y    | 67.44  | 1197.5149 | 11     | 1.1  | 599.7654  | 2 | 23.86 | 2        | F2:5370  | 12112021_RID_2349_DP2.raw | 2.1509 |
| R.VAPEEHPVLLTEAPLNPK.A              | Y    | 63.91  | 1953.0570 | 18     | 0.6  | 977.5364  | 2 | 45.29 | 2        | F2:12822 | 12112021_RID_2349_DP2.raw |        |
| K.AGFAGDDAPR.A                      | Y    | 60.62  | 975.4410  | 10     | 0.5  | 488.7280  | 2 | 26.11 | 1        | F1:7167  | 12112021_RID_2349_DP1.raw | 3.3593 |
| K.EITALAPSTMK.I                     | Y    | 52.44  | 1160.6111 | 11     | 0.0  | 581.3128  | 2 | 38.85 | 2        | F2:10632 | 12112021_RID_2349_DP2.raw |        |
| K.DSYVGDEAQS.K                      | Y    | 50.46  | 1353.6160 | 12     | 0.4  | 677.8156  | 2 | 20.64 | 2        | F2:4244  | 12112021_RID_2349_DP2.raw |        |
| K.EITALAPSTM(+15.99).K.I            | Y    | 47.42  | 1176.6060 | 11     | 0.9  | 589.3108  | 2 | 32.91 | 2        | F2:8537  | 12112021_RID_2349_DP2.raw |        |
| R.AVFPSIVGRPR.H                     | Y    | 44.25  | 1197.6981 | 11     | 1.0  | 599.8569  | 2 | 40.62 | 2        | F2:11273 | 12112021_RID_2349_DP2.raw |        |
| K.DLYANTVLSGGTTM(+15.99).Y.PGIADR.M | Y    | 41.30  | 2230.0576 | 21     | -0.2 | 1116.0359 | 2 | 56.05 | 2        | F2:16292 | 12112021_RID_2349_DP2.raw |        |

ETE74025.1  
[back to list](#)

[Protein Coverage](#) | [Supporting Peptides](#) |  
Protein Coverage:

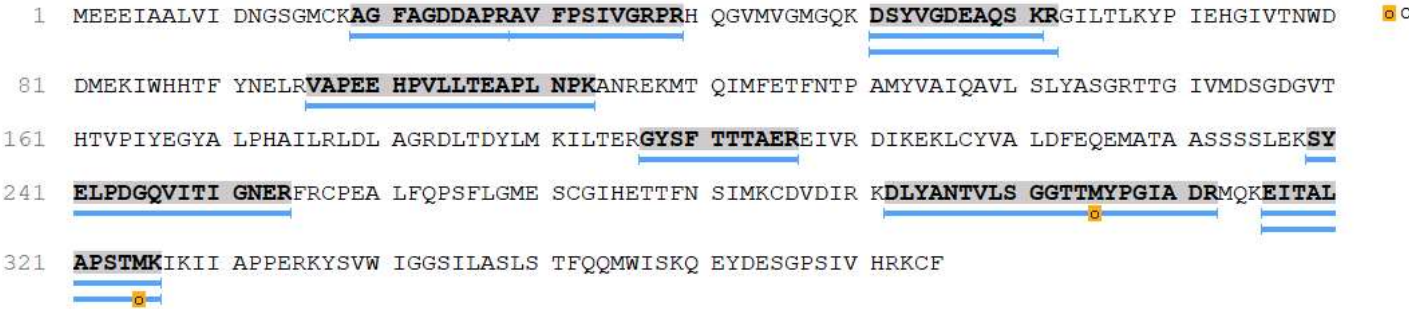

Supporting Peptides:

| Peptide                           | Uniq | -10lgP | Mass      | Length | ppm  | m/z       | z | RT    | Fraction | Scan     | Source File               | Area   |
|-----------------------------------|------|--------|-----------|--------|------|-----------|---|-------|----------|----------|---------------------------|--------|
| R.GYSFTTTAER.E                    | Y    | 72.34  | 1131.5197 | 10     | 1.1  | 566.7677  | 2 | 33.52 | 2        | F2:8772  | 12112021_RID_2349_DP2.raw |        |
| K.SYELPDGQVITIGNER.F              | Y    | 71.69  | 1789.8846 | 16     | 0.3  | 895.9499  | 2 | 53.88 | 2        | F2:15567 | 12112021_RID_2349_DP2.raw |        |
| K.DSYVGDEAQS.K                    | Y    | 67.44  | 1197.5149 | 11     | 1.1  | 599.7654  | 2 | 23.86 | 2        | F2:5370  | 12112021_RID_2349_DP2.raw | 2.1509 |
| R.VAPEEHPVLLTEAPLNPK.A            | Y    | 63.91  | 1953.0570 | 18     | 0.6  | 977.5364  | 2 | 45.29 | 2        | F2:12822 | 12112021_RID_2349_DP2.raw |        |
| K.AGFAGDDAPR.A                    | Y    | 60.62  | 975.4410  | 10     | 0.5  | 488.7280  | 2 | 26.11 | 1        | F1:7167  | 12112021_RID_2349_DP1.raw | 3.3593 |
| K.EITALAPSTMIK.I                  | Y    | 52.44  | 1160.6111 | 11     | 0.0  | 581.3128  | 2 | 38.85 | 2        | F2:10632 | 12112021_RID_2349_DP2.raw |        |
| K.DSYVGDEAQS.K                    | Y    | 50.46  | 1353.6160 | 12     | 0.4  | 677.8156  | 2 | 20.64 | 2        | F2:4244  | 12112021_RID_2349_DP2.raw |        |
| K.EITALAPSTM(+15.99)K.I           | Y    | 47.42  | 1176.6060 | 11     | 0.9  | 589.3108  | 2 | 32.91 | 2        | F2:8537  | 12112021_RID_2349_DP2.raw |        |
| R.AVFPSIVGRPR.H                   | Y    | 44.25  | 1197.6981 | 11     | 1.0  | 599.8569  | 2 | 40.62 | 2        | F2:11273 | 12112021_RID_2349_DP2.raw |        |
| K.DLYANTVLSGGTTM(+15.99)YPGIADR.M | Y    | 41.30  | 2230.0576 | 21     | -0.2 | 1116.0359 | 2 | 56.05 | 2        | F2:16292 | 12112021_RID_2349_DP2.raw |        |

ADK22827.1  
[back to list](#)

[Protein Coverage](#) | [Supporting Peptides](#) |  
Protein Coverage:

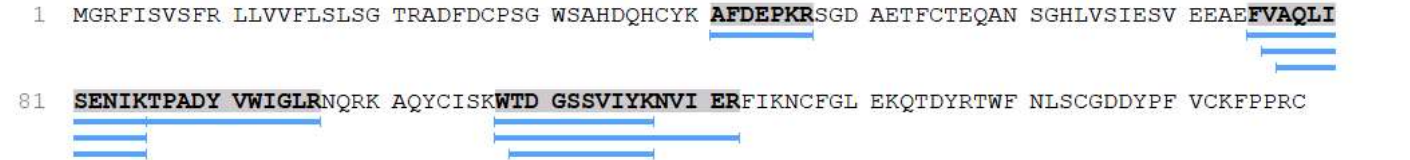

Supporting Peptides:

| Peptide             | Uniq | -10lgP | Mass      | Length | ppm  | m/z      | z | RT    | Fraction | Scan     | Source File               | Area F1  | Area F2  | Area I |
|---------------------|------|--------|-----------|--------|------|----------|---|-------|----------|----------|---------------------------|----------|----------|--------|
| K.WTDGSSVIYK.N      | N    | 77.27  | 1154.5608 | 10     | 0.0  | 578.2877 | 2 | 37.40 | 5        | F5:10403 | 17112021_RID_2349_DP5.raw | 2.1576E5 | 2.5151E5 | 1.7167 |
| K.TPADYVWIGLR.N     | Y    | 76.52  | 1289.6768 | 11     | 0.6  | 645.8461 | 2 | 57.87 | 7        | F7:17384 | 17112021_RID_2349_DP7.raw |          |          |        |
| K.WTDGSSVIYKNVIER.F | N    | 71.65  | 1765.8999 | 15     | 0.3  | 883.9575 | 2 | 44.92 | 5        | F5:12969 | 17112021_RID_2349_DP5.raw |          |          |        |
| F.VAQLISENIK.T      | N    | 48.99  | 1113.6394 | 10     | -0.4 | 557.8268 | 2 | 37.53 | 5        | F5:10425 | 17112021_RID_2349_DP5.raw |          |          |        |
| W.TDGSSVIYK.N       | N    | 44.54  | 968.4814  | 9      | 0.1  | 485.2480 | 2 | 26.37 | 5        | F5:6664  | 17112021_RID_2349_DP5.raw |          |          |        |
| E.FVAQLISENIK.T     | N    | 44.08  | 1260.7078 | 11     | 0.3  | 631.3613 | 2 | 49.39 | 5        | F5:14370 | 17112021_RID_2349_DP5.raw |          |          |        |
| K.AFDEPKR.S         | N    | 40.54  | 861.4344  | 7      | -0.5 | 431.7243 | 2 | 18.04 | 5        | F5:3641  | 17112021_RID_2349_DP5.raw |          |          |        |
| V.AQLISENIK.T       | N    | 39.19  | 1014.5709 | 9      | 0.0  | 508.2927 | 2 | 33.55 | 5        | F5:9140  | 17112021_RID_2349_DP5.raw |          |          |        |

total 8 peptides

ADK22825.1  
[back to list](#)

[Protein Coverage](#) | [Supporting Peptides](#) |  
Protein Coverage:

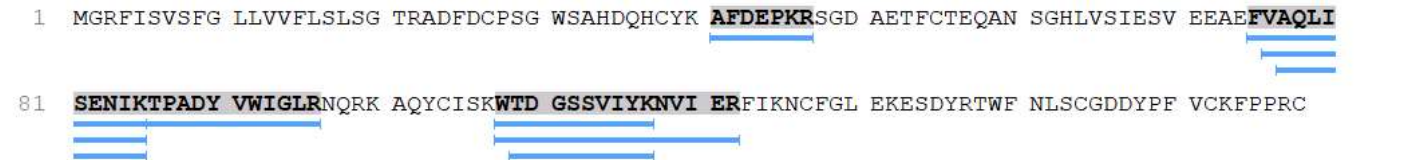

8/2/22, 12:12 PM

proteins

Supporting Peptides:

| Peptide             | Uniq | -10lgP | Mass      | Length | ppm  | m/z      | z | RT    | Fraction | Scan     | Source File               | Area F1  | Area F2  | Area 1 |
|---------------------|------|--------|-----------|--------|------|----------|---|-------|----------|----------|---------------------------|----------|----------|--------|
| K.WTDGSSVIYK.N      | N    | 77.27  | 1154.5608 | 10     | 0.0  | 578.2877 | 2 | 37.40 | 5        | F5:10403 | 17112021_RID_2349_DP5.raw | 2.1576E5 | 2.5151E5 | 1.7167 |
| K.TPADYVWIGLR.N     | Y    | 76.52  | 1289.6768 | 11     | 0.6  | 645.8461 | 2 | 57.87 | 7        | F7:17384 | 17112021_RID_2349_DP7.raw |          |          |        |
| K.WTDGSSVIYKNVIER.F | N    | 71.65  | 1765.8999 | 15     | 0.3  | 883.9575 | 2 | 44.92 | 5        | F5:12969 | 17112021_RID_2349_DP5.raw |          |          |        |
| F.VAQLISENIK.T      | N    | 48.99  | 1113.6394 | 10     | -0.4 | 557.8268 | 2 | 37.53 | 5        | F5:10425 | 17112021_RID_2349_DP5.raw |          |          |        |
| W.TDGSSVIYK.N       | N    | 44.54  | 968.4814  | 9      | 0.1  | 485.2480 | 2 | 26.37 | 5        | F5:6664  | 17112021_RID_2349_DP5.raw |          |          |        |
| E.FVAQLISENIK.T     | N    | 44.08  | 1260.7078 | 11     | 0.3  | 631.3613 | 2 | 49.39 | 5        | F5:14370 | 17112021_RID_2349_DP5.raw |          |          |        |
| K.AFDEPKR.S         | N    | 40.54  | 861.4344  | 7      | -0.5 | 431.7243 | 2 | 18.04 | 5        | F5:3641  | 17112021_RID_2349_DP5.raw |          |          |        |
| V.AQLISENIK.T       | N    | 39.19  | 1014.5709 | 9      | 0.0  | 508.2927 | 2 | 33.55 | 5        | F5:9140  | 17112021_RID_2349_DP5.raw |          |          |        |

total 8 peptides

ADN04916.1  
[back to list](#)

[Protein Coverage](#) | [Supporting Peptides](#) |  
Protein Coverage:

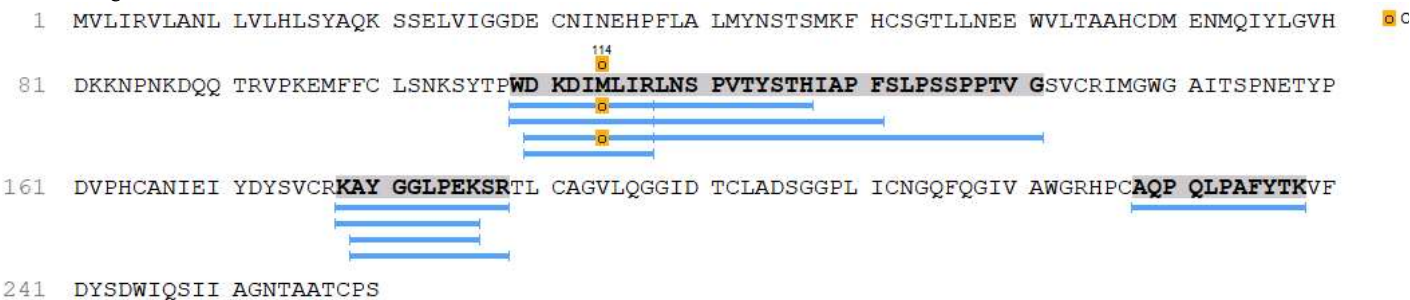

Supporting Peptides:

| Peptide                      | Uniq | -10lgP | Mass      | Length | ppm  | m/z       | z | RT    | Fraction | Scan     | Source File               | Area F1  | Area F2 | Area 1 |
|------------------------------|------|--------|-----------|--------|------|-----------|---|-------|----------|----------|---------------------------|----------|---------|--------|
| R.KAYGGLPEKSR.T              | Y    | 66.51  | 1204.6564 | 11     | -0.1 | 603.3354  | 2 | 21.80 | 2        | F2:4728  | 12112021_RID_2349_DP2.raw | 5.4582E5 | 2.00    |        |
| K.AYGGLPEKSR.T               | N    | 64.80  | 1076.5614 | 10     | 0.4  | 539.2882  | 2 | 22.20 | 2        | F2:4846  | 12112021_RID_2349_DP2.raw |          | 5.68    |        |
| P.WDKDIMLIR.L                | N    | 59.98  | 1188.6324 | 9      | 0.8  | 595.3240  | 2 | 47.61 | 2        | F2:13483 | 12112021_RID_2349_DP2.raw |          | 2.01    |        |
| R.LNSPVTYSTHI.I              | Y    | 58.68  | 1117.5404 | 10     | 0.6  | 559.7778  | 2 | 32.48 | 2        | F2:8433  | 12112021_RID_2349_DP2.raw |          | 5.06    |        |
| R.KAYGGLPEK.S                | Y    | 58.02  | 961.5233  | 9      | 0.5  | 481.7692  | 2 | 22.09 | 2        | F2:4938  | 12112021_RID_2349_DP2.raw |          | 1.43    |        |
| K.AYGGLPEK.S                 | N    | 56.12  | 833.4283  | 8      | 0.6  | 417.7217  | 2 | 26.79 | 2        | F2:6388  | 12112021_RID_2349_DP2.raw | 3.9735E5 | 1.69    |        |
| R.LNSPVTYSTHIAPF.S           | Y    | 54.49  | 1545.7827 | 14     | 0.3  | 773.8989  | 2 | 53.38 | 2        | F2:15391 | 12112021_RID_2349_DP2.raw |          | 3.47    |        |
| P.WDKDIM(+15.99)LIR.L        | N    | 54.14  | 1204.6274 | 9      | 0.6  | 603.3214  | 2 | 42.22 | 2        | F2:11819 | 12112021_RID_2349_DP2.raw |          | 1.42    |        |
| R.LNSPVTYSTHIAPFSLPSSPPTVG.S | Y    | 49.67  | 2468.2588 | 24     | 0.8  | 1235.1377 | 2 | 61.33 | 2        | F2:18069 | 12112021_RID_2349_DP2.raw |          | 1.89    |        |
| W.DKDIMLIR.L                 | N    | 44.22  | 1002.5532 | 8      | -0.5 | 502.2836  | 2 | 37.38 | 3        | F3:10341 | 17112021_RID_2349_DP3.raw |          |         |        |
| C.AQPQLPAFYTK.V              | Y    | 42.49  | 1262.6659 | 11     | 0.8  | 632.3407  | 2 | 45.16 | 2        | F2:12753 | 12112021_RID_2349_DP2.raw |          | 8.03    |        |
| W.DKDIM(+15.99)LIR.L         | N    | 39.37  | 1018.5481 | 8      | 0.3  | 510.2815  | 2 | 31.54 | 3        | F3:8358  | 17112021_RID_2349_DP3.raw |          |         |        |

total 12 peptides

E0Y418.1  
[back to list](#)

[Protein Coverage](#) | [Supporting Peptides](#) |  
Protein Coverage:

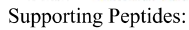**tota**

[back to list](#)

Protein Coverage:

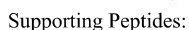

**total 12 peptide**

| Peptide       | Uniq | -10lgP | Mass      | Length | ppm  | m/z      | z | RT    | Fraction | Scan     | Source File               | Area F1 | Area F2 | Area F3 | Area F4 | A1 |
|---------------|------|--------|-----------|--------|------|----------|---|-------|----------|----------|---------------------------|---------|---------|---------|---------|----|
| K.TWEDAEEKF.C | N    | 40.38  | 1024.4502 | 8      | -0.9 | 513.2319 | 2 | 40.86 | 7        | F7:11654 | 17112021_RID_2349_DP7.raw |         |         |         |         |    |

total 12 peptide

AAY63876.1  
[back to list](#)

| [Protein Coverage](#) | [Supporting Peptides](#) |  
Protein Coverage:

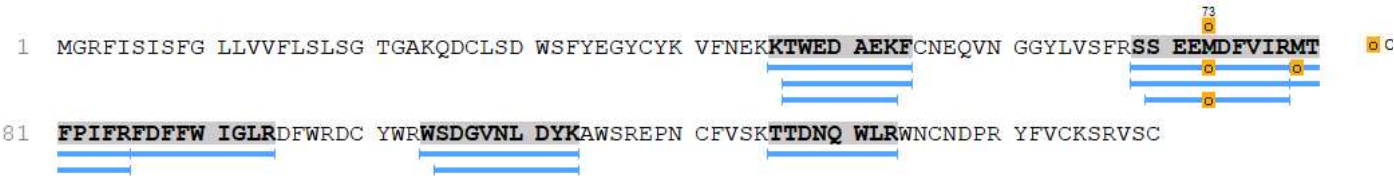

Supporting Peptides:

| Peptide                | Uniq | -10lgP | Mass      | Length | ppm  | m/z      | z | RT    | Fraction | Scan     | Source File               | Area F1 | Area F2 | Area F3 | Area F4 | A1  |
|------------------------|------|--------|-----------|--------|------|----------|---|-------|----------|----------|---------------------------|---------|---------|---------|---------|-----|
| R.WSDGVNLDYK.A         | Y    | 76.23  | 1195.5509 | 10     | -0.2 | 598.7826 | 2 | 42.63 | 7        | F7:12181 | 17112021_RID_2349_DP7.raw |         |         |         |         |     |
| R.SSEEMDFVIR.M         | Y    | 63.84  | 1211.5492 | 10     | -0.1 | 606.7818 | 2 | 46.89 | 7        | F7:13707 | 17112021_RID_2349_DP7.raw |         |         |         |         |     |
| K.TTDNQWLR.W           | N    | 59.51  | 1032.4989 | 8      | 0.4  | 517.2570 | 2 | 33.81 | 7        | F7:9330  | 17112021_RID_2349_DP7.raw |         |         |         |         | 8.7 |
| R.FDFFWIGLR.D          | Y    | 57.64  | 1199.6127 | 9      | -0.2 | 600.8135 | 2 | 74.61 | 7        | F7:23057 | 17112021_RID_2349_DP7.raw |         |         |         |         |     |
| R.SSEEM(+15.99)DFVIR.M | Y    | 57.28  | 1227.5441 | 10     | 0.3  | 614.7795 | 2 | 44.29 | 7        | F7:12932 | 17112021_RID_2349_DP7.raw |         |         |         |         |     |
| W.SDGVNLDYK.A          | Y    | 51.62  | 1009.4716 | 9      | -0.2 | 505.7430 | 2 | 32.58 | 7        | F7:8732  | 17112021_RID_2349_DP7.raw |         |         |         |         |     |
| R.MTFPIFR.F            | Y    | 47.81  | 910.4734  | 7      | 0.7  | 456.2443 | 2 | 54.20 | 7        | F7:16176 | 17112021_RID_2349_DP7.raw |         |         |         |         |     |
| K.TWEDAEEK.F           | N    | 42.92  | 877.3817  | 7      | 0.0  | 439.6982 | 2 | 23.16 | 7        | F7:5532  | 17112021_RID_2349_DP7.raw |         |         |         |         |     |
| S.SEEM(+15.99)DFVIR.M  | Y    | 42.14  | 1140.5121 | 9      | 0.0  | 571.2633 | 2 | 38.69 | 7        | F7:10887 | 17112021_RID_2349_DP7.raw |         |         |         |         |     |
| K.KTWEDAEEKF.C         | N    | 40.81  | 1152.5450 | 9      | 0.6  | 577.2802 | 2 | 34.65 | 7        | F7:9456  | 17112021_RID_2349_DP7.raw |         |         |         |         |     |
| R.M(+15.99)TFPIFR.F    | Y    | 40.76  | 926.4684  | 7      | -0.1 | 464.2414 | 2 | 47.07 | 7        | F7:13700 | 17112021_RID_2349_DP7.raw |         |         |         |         |     |
| K.TWEDAEEKF.C          | N    | 40.38  | 1024.4502 | 8      | -0.9 | 513.2319 | 2 | 40.86 | 7        | F7:11654 | 17112021_RID_2349_DP7.raw |         |         |         |         |     |

total 12 peptide

ADK22822.1  
[back to list](#)

| [Protein Coverage](#) | [Supporting Peptides](#) |  
Protein Coverage:

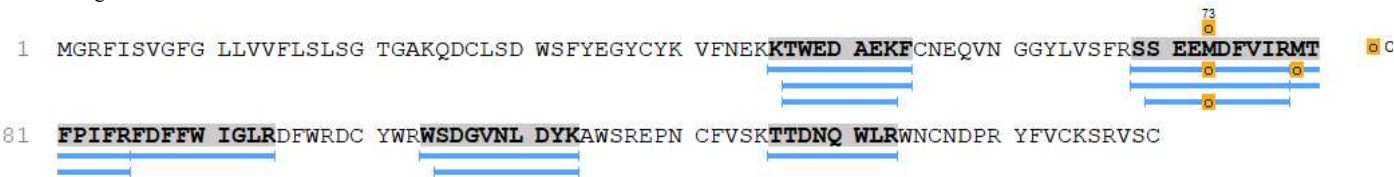

Supporting Peptides:

| Peptide                | Uniq | -10lgP | Mass      | Length | ppm  | m/z      | z | RT    | Fraction | Scan     | Source File               | Area F1 | Area F2 | Area F3 | Area F4 | A1  |
|------------------------|------|--------|-----------|--------|------|----------|---|-------|----------|----------|---------------------------|---------|---------|---------|---------|-----|
| R.WSDGVNLDYK.A         | Y    | 76.23  | 1195.5509 | 10     | -0.2 | 598.7826 | 2 | 42.63 | 7        | F7:12181 | 17112021_RID_2349_DP7.raw |         |         |         |         |     |
| R.SSEEMDFVIR.M         | Y    | 63.84  | 1211.5492 | 10     | -0.1 | 606.7818 | 2 | 46.89 | 7        | F7:13707 | 17112021_RID_2349_DP7.raw |         |         |         |         |     |
| K.TTDNQWLR.W           | N    | 59.51  | 1032.4989 | 8      | 0.4  | 517.2570 | 2 | 33.81 | 7        | F7:9330  | 17112021_RID_2349_DP7.raw |         |         |         |         | 8.7 |
| R.FDFFWIGLR.D          | Y    | 57.64  | 1199.6127 | 9      | -0.2 | 600.8135 | 2 | 74.61 | 7        | F7:23057 | 17112021_RID_2349_DP7.raw |         |         |         |         |     |
| R.SSEEM(+15.99)DFVIR.M | Y    | 57.28  | 1227.5441 | 10     | 0.3  | 614.7795 | 2 | 44.29 | 7        | F7:12932 | 17112021_RID_2349_DP7.raw |         |         |         |         |     |
| W.SDGVNLDYK.A          | Y    | 51.62  | 1009.4716 | 9      | -0.2 | 505.7430 | 2 | 32.58 | 7        | F7:8732  | 17112021_RID_2349_DP7.raw |         |         |         |         |     |
| R.MTFPIFR.F            | Y    | 47.81  | 910.4734  | 7      | 0.7  | 456.2443 | 2 | 54.20 | 7        | F7:16176 | 17112021_RID_2349_DP7.raw |         |         |         |         |     |
| K.TWEDAEEK.F           | N    | 42.92  | 877.3817  | 7      | 0.0  | 439.6982 | 2 | 23.16 | 7        | F7:5532  | 17112021_RID_2349_DP7.raw |         |         |         |         |     |
| S.SEEM(+15.99)DFVIR.M  | Y    | 42.14  | 1140.5121 | 9      | 0.0  | 571.2633 | 2 | 38.69 | 7        | F7:10887 | 17112021_RID_2349_DP7.raw |         |         |         |         |     |

total 12 peptide

| Peptide             | Uniq | -10lgP | Mass      | Length | ppm  | m/z      | z | RT    | Fraction | Scan     | Source File               | Area F1 | Area F2 | Area F3 | Area F4 | A1 |
|---------------------|------|--------|-----------|--------|------|----------|---|-------|----------|----------|---------------------------|---------|---------|---------|---------|----|
| K.KTWEDA EKFC       | N    | 40.81  | 1152.5450 | 9      | 0.6  | 577.2802 | 2 | 34.65 | 7        | F7:9456  | 17112021_RID_2349_DP7.raw |         |         |         |         |    |
| R.M(+15.99)TFPIFR.F | Y    | 40.76  | 926.4684  | 7      | -0.1 | 464.2414 | 2 | 47.07 | 7        | F7:13700 | 17112021_RID_2349_DP7.raw |         |         |         |         |    |
| K.TWEDA EKFC        | N    | 40.38  | 1024.4502 | 8      | -0.9 | 513.2319 | 2 | 40.86 | 7        | F7:11654 | 17112021_RID_2349_DP7.raw |         |         |         |         |    |

total 12 peptide

Q4PRC6.1  
[back to list](#)

[Protein Coverage](#) | [Supporting Peptides](#) |  
Protein Coverage:

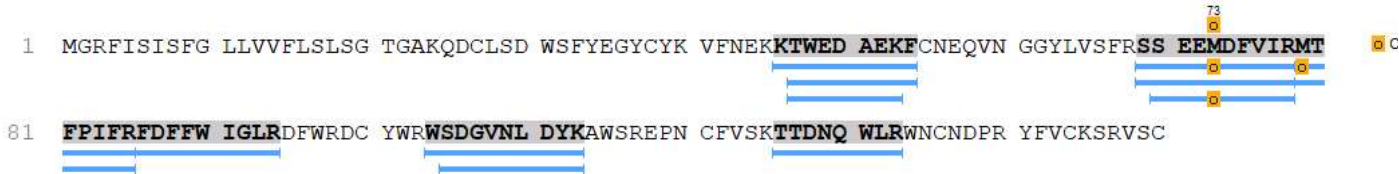

Supporting Peptides:

| Peptide                | Uniq | -10lgP | Mass      | Length | ppm  | m/z      | z | RT    | Fraction | Scan     | Source File               | Area F1 | Area F2 | Area F3 | Area F4 | A1  |
|------------------------|------|--------|-----------|--------|------|----------|---|-------|----------|----------|---------------------------|---------|---------|---------|---------|-----|
| R.WSDGVNL DYK.A        | Y    | 76.23  | 1195.5509 | 10     | -0.2 | 598.7826 | 2 | 42.63 | 7        | F7:12181 | 17112021_RID_2349_DP7.raw |         |         |         |         |     |
| R.SSEEMDFVIR.M         | Y    | 63.84  | 1211.5492 | 10     | -0.1 | 606.7818 | 2 | 46.89 | 7        | F7:13707 | 17112021_RID_2349_DP7.raw |         |         |         |         |     |
| K.TTDNQWLR.W           | N    | 59.51  | 1032.4989 | 8      | 0.4  | 517.2570 | 2 | 33.81 | 7        | F7:9330  | 17112021_RID_2349_DP7.raw |         |         |         |         | 8.7 |
| R.FDFFWIGLR.D          | Y    | 57.64  | 1199.6127 | 9      | -0.2 | 600.8135 | 2 | 74.61 | 7        | F7:23057 | 17112021_RID_2349_DP7.raw |         |         |         |         |     |
| R.SSEEM(+15.99)DFVIR.M | Y    | 57.28  | 1227.5441 | 10     | 0.3  | 614.7795 | 2 | 44.29 | 7        | F7:12932 | 17112021_RID_2349_DP7.raw |         |         |         |         |     |
| W.SDGVNL DYK.A         | Y    | 51.62  | 1009.4716 | 9      | -0.2 | 505.7430 | 2 | 32.58 | 7        | F7:8732  | 17112021_RID_2349_DP7.raw |         |         |         |         |     |
| R.MTFPIFR.F            | Y    | 47.81  | 910.4734  | 7      | 0.7  | 456.2443 | 2 | 54.20 | 7        | F7:16176 | 17112021_RID_2349_DP7.raw |         |         |         |         |     |
| K.TWEDA EK.F           | N    | 42.92  | 877.3817  | 7      | 0.0  | 439.6982 | 2 | 23.16 | 7        | F7:5532  | 17112021_RID_2349_DP7.raw |         |         |         |         |     |
| S.SEEM(+15.99)DFVIR.M  | Y    | 42.14  | 1140.5121 | 9      | 0.0  | 571.2633 | 2 | 38.69 | 7        | F7:10887 | 17112021_RID_2349_DP7.raw |         |         |         |         |     |
| K.KTWEDA EKFC          | N    | 40.81  | 1152.5450 | 9      | 0.6  | 577.2802 | 2 | 34.65 | 7        | F7:9456  | 17112021_RID_2349_DP7.raw |         |         |         |         |     |
| R.M(+15.99)TFPIFR.F    | Y    | 40.76  | 926.4684  | 7      | -0.1 | 464.2414 | 2 | 47.07 | 7        | F7:13700 | 17112021_RID_2349_DP7.raw |         |         |         |         |     |
| K.TWEDA EKFC           | N    | 40.38  | 1024.4502 | 8      | -0.9 | 513.2319 | 2 | 40.86 | 7        | F7:11654 | 17112021_RID_2349_DP7.raw |         |         |         |         |     |

total 12 peptide

TRINITY\_DN459  
[back to list](#)

[Protein Coverage](#) | [Supporting Peptides](#) |  
Protein Coverage:

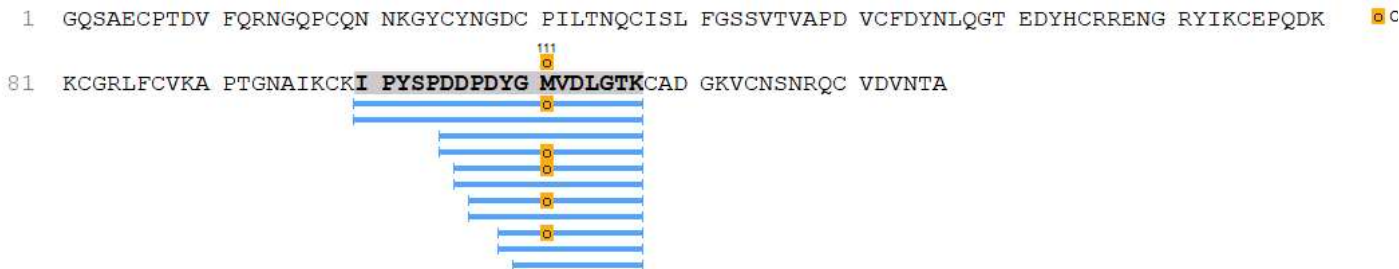

Supporting Peptides:

| Peptide                  | Uniq | -10lgP | Mass      | Length | ppm  | m/z      | z | RT    | Fraction | Scan     | Source File               | Area F1  | Area |
|--------------------------|------|--------|-----------|--------|------|----------|---|-------|----------|----------|---------------------------|----------|------|
| P.DDPDYG MVDLGTK.C       | N    | 86.80  | 1424.6129 | 13     | 0.9  | 713.3144 | 2 | 48.02 | 1        | F1:14542 | 12112021_RID_2349_DP1.raw | 3.1015E5 |      |
| K.IPYSPDDPDYG MVDLGTK.C  | Y    | 73.90  | 1981.8978 | 18     | 1.1  | 991.9573 | 2 | 53.28 | 3        | F3:15640 | 17112021_RID_2349_DP3.raw | 9.0784E5 | 1.1  |
| D.PDYG MVDLGTK.C         | N    | 73.86  | 1194.5591 | 11     | -0.1 | 598.2867 | 2 | 43.94 | 1        | F1:13219 | 12112021_RID_2349_DP1.raw | 7.4048E6 | 4.1  |
| D.PDYG(+15.99)VDLGTK.C   | N    | 71.86  | 1210.5540 | 11     | 0.4  | 606.2845 | 2 | 40.64 | 1        | F1:13230 | 12112021_RID_2349_DP1.raw | 6.7718E6 | 3.5  |
| P.DDPDYG(+15.99)VDLGTK.C | N    | 69.19  | 1440.6078 | 13     | 0.3  | 721.3114 | 2 | 40.35 | 6        | F6:11298 | 17112021_RID_2349_DP6.raw | 7.0367E4 |      |

| Peptide                        | Uniq | -10lgP | Mass      | Length | ppm  | m/z      | z | RT    | Fraction | Scan     | Source File               | Area F1  | Area F2 | Area F3 |
|--------------------------------|------|--------|-----------|--------|------|----------|---|-------|----------|----------|---------------------------|----------|---------|---------|
| D.DPDYGMVDLGTK.C               | N    | 68.28  | 1309.5859 | 12     | 1.2  | 655.8010 | 2 | 47.41 | 1        | F1:14315 | 12112021_RID_2349_DP1.raw | 7.5385E5 |         |         |
| D.DPDYGM(+15.99)VDLGTK.C       | N    | 61.75  | 1325.5809 | 12     | 0.8  | 663.7983 | 2 | 39.96 | 1        | F1:11872 | 12112021_RID_2349_DP1.raw | 2.7576E5 |         |         |
| K.IPYSPDDPDYGM(+15.99)VDLGTK.C | Y    | 56.68  | 1997.8928 | 18     | 0.4  | 999.9541 | 2 | 47.71 | 4        | F4:13784 | 17112021_RID_2349_DP4.raw | 2.172E5  |         |         |
| D.YGM(+15.99)VDLGTK.C          | N    | 54.16  | 998.4742  | 9      | 0.8  | 500.2448 | 2 | 39.32 | 1        | F1:11674 | 12112021_RID_2349_DP1.raw | 1.0157E5 |         |         |
| D.YGMVDLGTK.C                  | N    | 45.13  | 982.4794  | 9      | -0.5 | 492.2467 | 2 | 39.32 | 1        | F1:11699 | 12112021_RID_2349_DP1.raw | 1.3963E5 |         |         |
| Y.GMVDLGTK.C                   | N    | 44.20  | 819.4160  | 8      | 0.0  | 410.7153 | 2 | 30.74 | 7        | F7:8124  | 17112021_RID_2349_DP7.raw |          |         |         |

TRINITY\_DN157  
[back to list](#)

[Protein Coverage](#) | [Supporting Peptides](#) |  
Protein Coverage:

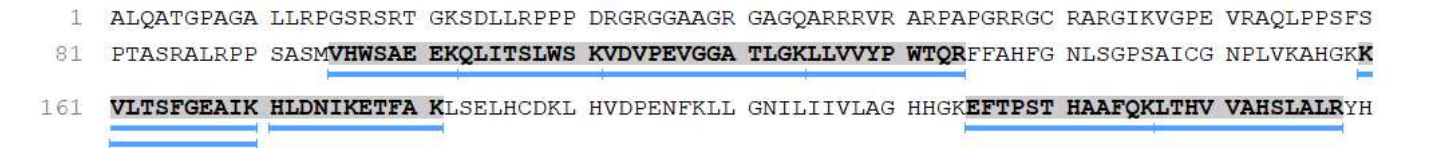

Supporting Peptides:

| Peptide           | Uniq | -10lgP | Mass      | Length | ppm  | m/z      | z | RT    | Fraction | Scan     | Source File               | Area F1  | Area F2  | Area F3  |
|-------------------|------|--------|-----------|--------|------|----------|---|-------|----------|----------|---------------------------|----------|----------|----------|
| K.VDVPEVGATLGK.L  | Y    | 80.51  | 1240.6663 | 13     | 0.6  | 621.3408 | 2 | 42.05 | 7        | F7:11994 | 17112021_RID_2349_DP7.raw |          |          |          |
| K.LLVVYPWTQR.F    | N    | 62.42  | 1273.7183 | 10     | 0.7  | 637.8668 | 2 | 56.17 | 4        | F4:16617 | 17112021_RID_2349_DP4.raw | 5.7141E5 | 2.1702E5 | 1.0063E6 |
| K.HLDNIKETFAK.L   | Y    | 61.67  | 1314.6931 | 11     | 0.6  | 439.2386 | 3 | 30.74 | 7        | F7:8165  | 17112021_RID_2349_DP7.raw |          |          |          |
| K.VLTSFGGEAIK.H   | N    | 61.56  | 1063.5913 | 10     | -0.1 | 532.8029 | 2 | 41.86 | 7        | F7:11920 | 17112021_RID_2349_DP7.raw |          |          |          |
| M.VHWSAEK.Q       | N    | 52.31  | 984.4665  | 8      | 0.7  | 493.2408 | 2 | 21.02 | 7        | F7:4832  | 17112021_RID_2349_DP7.raw |          |          |          |
| K.EFTPTSTHAAFQK.L | N    | 50.12  | 1362.6567 | 12     | 0.3  | 682.3358 | 2 | 30.43 | 7        | F7:8112  | 17112021_RID_2349_DP7.raw |          |          |          |
| K.KVLTSFGGEAIK.H  | N    | 48.51  | 1191.6863 | 11     | 1.5  | 596.8513 | 2 | 36.27 | 7        | F7:10106 | 17112021_RID_2349_DP7.raw |          |          |          |
| K.QLITSLWSK.V     | Y    | 42.95  | 1074.6073 | 9      | -0.1 | 538.3109 | 2 | 50.81 | 7        | F7:15061 | 17112021_RID_2349_DP7.raw |          |          |          |
| K.LTHVVAHSLALR.Y  | Y    | 42.42  | 1315.7725 | 12     | 0.2  | 439.5982 | 3 | 32.34 | 7        | F7:8705  | 17112021_RID_2349_DP7.raw |          |          |          |

total 9 peptides

P18964.1  
[back to list](#)

[Protein Coverage](#) | [Supporting Peptides](#) |  
Protein Coverage:

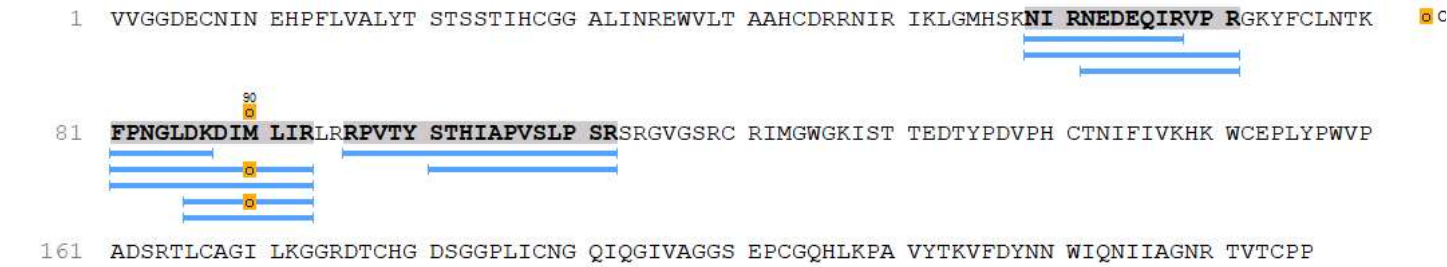

Supporting Peptides:

| Peptide               | Uniq | -10lgP | Mass      | Length | ppm | m/z      | z | RT    | Fraction | Scan     | Source File               | Area F1 | Area F2 | Area F3  |
|-----------------------|------|--------|-----------|--------|-----|----------|---|-------|----------|----------|---------------------------|---------|---------|----------|
| K.FPNGLDKDIMLIR.L     | Y    | 66.83  | 1530.8228 | 13     | 0.2 | 511.2816 | 3 | 54.26 | 3        | F3:15907 | 17112021_RID_2349_DP3.raw |         |         | 2.7289E6 |
| Y.STHIAPVSLPSR.S      | Y    | 63.76  | 1263.6935 | 12     | 0.2 | 632.8541 | 2 | 34.00 | 7        | F7:9308  | 17112021_RID_2349_DP7.raw |         |         |          |
| R.NEDEQIRVPR.G        | Y    | 62.99  | 1254.6316 | 10     | 0.2 | 628.3232 | 2 | 27.46 | 7        | F7:7050  | 17112021_RID_2349_DP7.raw |         |         | 7.022E6  |
| K.NIRNEDEQIRVPR.G     | Y    | 61.00  | 1637.8597 | 13     | 0.5 | 546.9608 | 3 | 29.37 | 7        | F7:7736  | 17112021_RID_2349_DP7.raw |         |         | 2.8569E6 |
| R.RPVTYSTHIAPVSLPSR.S | Y    | 57.58  | 1880.0267 | 17     | 0.6 | 627.6832 | 3 | 39.74 | 4        | F4:11137 | 17112021_RID_2349_DP4.raw |         |         | 1.6115E7 |
| K.NIRNEDEQIR.V        | Y    | 56.31  | 1285.6375 | 10     | 0.5 | 643.8263 | 2 | 20.61 | 7        | F7:4677  | 17112021_RID_2349_DP7.raw |         |         | 7.3183E5 |

total 10 peptides

| Peptide                   | Uniq | -10lgP | Mass      | Length | ppm  | m/z      | z | RT    | Fraction | Scan     | Source File               | Area F1 | Area F2 | Area F3  |
|---------------------------|------|--------|-----------|--------|------|----------|---|-------|----------|----------|---------------------------|---------|---------|----------|
| K.FPNGLDKDIM(+15.99)LIR.L | Y    | 47.93  | 1546.8177 | 13     | 0.2  | 516.6133 | 3 | 50.38 | 3        | F3:14752 | 17112021_RID_2349_DP3.raw |         |         | 2.1323E5 |
| L.DKDIMLIR.L              | N    | 44.22  | 1002.5532 | 8      | -0.5 | 502.2836 | 2 | 37.38 | 3        | F3:10341 | 17112021_RID_2349_DP3.raw |         |         | 5.8616E6 |
| K.FPNGLDK.D               | Y    | 41.98  | 789.4021  | 7      | 1.3  | 395.7088 | 2 | 29.86 | 7        | F7:7802  | 17112021_RID_2349_DP7.raw |         |         | 1.7097E6 |
| L.DKDIM(+15.99)LIR.L      | N    | 39.37  | 1018.5481 | 8      | 0.3  | 510.2815 | 2 | 31.54 | 3        | F3:8358  | 17112021_RID_2349_DP3.raw |         |         | 1.7097E6 |
| total 10 peptides         |      |        |           |        |      |          |   |       |          |          |                           |         |         |          |

ADP88558.1

[back to list](#)

[Protein Coverage](#) | [Supporting Peptides](#)

Protein Coverage:

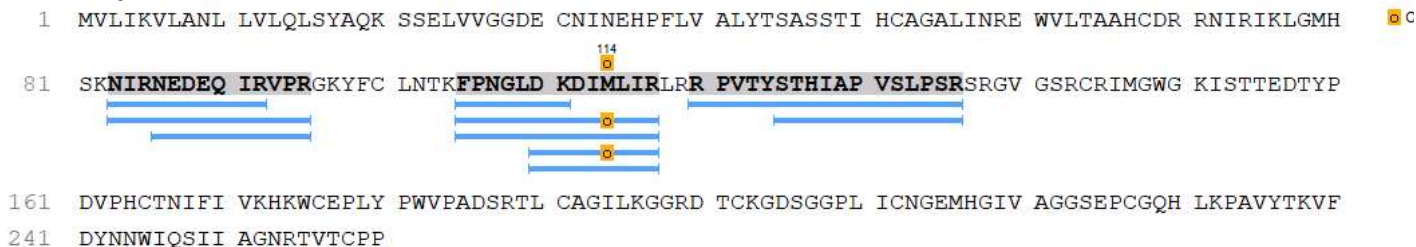

### Supporting Peptides:

| Peptide                      |   | Uniq  | -10lgP    | Mass | Length | ppm      | m/z | z     | RT | Fraction | Scan     | Source File               | Area F1 | Area F2 | Area F3  |
|------------------------------|---|-------|-----------|------|--------|----------|-----|-------|----|----------|----------|---------------------------|---------|---------|----------|
| K.FPNGLDKDIMLIR.L            | Y | 66.83 | 1530.8228 | 13   | 0.2    | 511.2816 | 3   | 54.26 | 3  |          | F3:15907 | 17112021_RID_2349_DP3.raw |         |         | 2.7289E6 |
| Y.STHIAPVSLPSR.S             | Y | 63.76 | 1263.6935 | 12   | 0.2    | 632.8541 | 2   | 34.00 | 7  |          | F7:9308  | 17112021_RID_2349_DP7.raw |         |         |          |
| R.NEDEQIRVPR.G               | Y | 62.99 | 1254.6316 | 10   | 0.2    | 628.3232 | 2   | 27.46 | 7  |          | F7:7050  | 17112021_RID_2349_DP7.raw |         |         | 7.022E6  |
| K.NIRNEDEQIRVPR.G            | Y | 61.00 | 1637.8597 | 13   | 0.5    | 546.9608 | 3   | 29.37 | 7  |          | F7:7736  | 17112021_RID_2349_DP7.raw |         |         | 2.8569E6 |
| R.RPVTYSTHIAPVSLPSR.S        | Y | 57.58 | 1880.0267 | 17   | 0.6    | 627.6832 | 3   | 39.74 | 4  |          | F4:11137 | 17112021_RID_2349_DP4.raw |         |         | 1.6115E7 |
| K.NIRNEDEQIR.V               | Y | 56.31 | 1285.6375 | 10   | 0.5    | 643.8263 | 2   | 20.61 | 7  |          | F7:4677  | 17112021_RID_2349_DP7.raw |         |         | 7.3183E5 |
| K.FPNGLDKDIM(+15.99)LIR.L    | Y | 47.93 | 1546.8177 | 13   | 0.2    | 516.6133 | 3   | 50.38 | 3  |          | F3:14752 | 17112021_RID_2349_DP3.raw |         |         | 2.1323E5 |
| L.DKDIMLIR.L                 | N | 44.22 | 1002.5532 | 8    | -0.5   | 502.2836 | 2   | 37.38 | 3  |          | F3:10341 | 17112021_RID_2349_DP3.raw |         |         | 5.8616E6 |
| K.FPNGLDK.D                  | Y | 41.98 | 789.4021  | 7    | 1.3    | 395.7088 | 2   | 29.86 | 7  |          | F7:7802  | 17112021_RID_2349_DP7.raw |         |         |          |
| L.DKDIM(+15.99)LIR.L         | N | 39.37 | 1018.5481 | 8    | 0.3    | 510.2815 | 2   | 31.54 | 3  |          | F3:8358  | 17112021_RID_2349_DP3.raw |         |         | 1.7097E6 |
| total 10 peptides identified |   |       |           |      |        |          |     |       |    |          |          |                           |         |         |          |

P18965.2

[back to list](#)

| [Protein Coverage](#) | [Supporting Peptides](#) |

Protein Coverage:

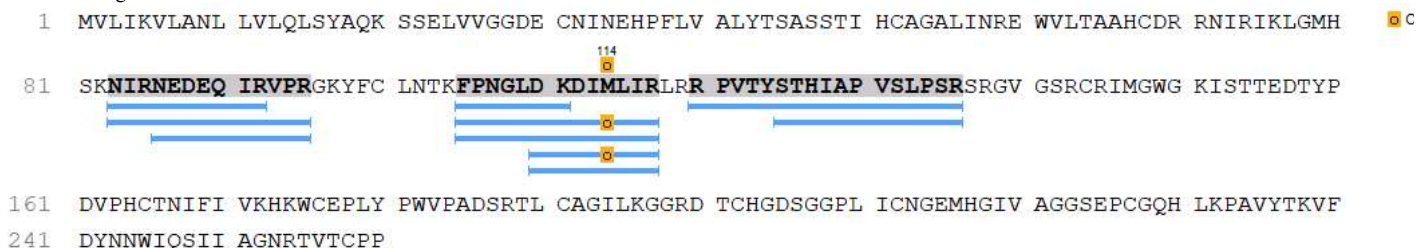

### Supporting Peptides:

[illegible]

| Peptide                   | Uniq | -10lgP | Mass      | Length | ppm  | m/z      | z | RT    | Fraction | Scan     | Source File               | Area F1 | Area F2 | Area F3  |
|---------------------------|------|--------|-----------|--------|------|----------|---|-------|----------|----------|---------------------------|---------|---------|----------|
| K.NIRNEDEQIR.V            | Y    | 56.31  | 1285.6375 | 10     | 0.5  | 643.8263 | 2 | 20.61 | 7        | F7:4677  | 17112021_RID_2349_DP7.raw |         |         | 7.3183E5 |
| K.FPNGLDKDIM(+15.99)LIR.L | Y    | 47.93  | 1546.8177 | 13     | 0.2  | 516.6133 | 3 | 50.38 | 3        | F3:14752 | 17112021_RID_2349_DP3.raw |         |         | 2.1323E5 |
| L.DKDIMLIR.L              | N    | 44.22  | 1002.5532 | 8      | -0.5 | 502.2836 | 2 | 37.38 | 3        | F3:10341 | 17112021_RID_2349_DP3.raw |         |         | 5.8616E6 |
| K.FPNGLDK.D               | Y    | 41.98  | 789.4021  | 7      | 1.3  | 395.7088 | 2 | 29.86 | 7        | F7:7802  | 17112021_RID_2349_DP7.raw |         |         |          |
| L.DKDIM(+15.99)LIR.L      | N    | 39.37  | 1018.5481 | 8      | 0.3  | 510.2815 | 2 | 31.54 | 3        | F3:8358  | 17112021_RID_2349_DP3.raw |         |         | 1.7097E6 |
| total 10 peptides         |      |        |           |        |      |          |   |       |          |          |                           |         |         |          |

TRINITY\_DN2646  
[back to list](#)

[Protein Coverage](#) | [Supporting Peptides](#) |  
Protein Coverage:

|     |            |             |            |            |            |            |            |            |            |            |            |  |  |  |
|-----|------------|-------------|------------|------------|------------|------------|------------|------------|------------|------------|------------|--|--|--|
| 1   | MAPGGWMLLA | GLLLLLLGGLD | RPSSGSAAGP | VPLVIWHGMG | DSCCNPLSMG | YIKKIVEEK  | I          | PGIYVLSLK  | I          | GNTLIDDMEN |            |  |  |  |
| 81  | SFFMDVNNQV | KKVCDQLSKD  | PK         | LQGGYNAM   | GFSQGGQFLR | AVVQRCPSPP | MFNLISIGGQ | HQGVFGFPHC | PGESSHLCDW |            |            |  |  |  |
| 161 | LRKVLNIAYT | DKIQK       | HLVQA      | QYWHDPVNEQ | QYR        | SSLFLA     | DINQER     | VINE       | TYKKNLMTLK | KEVMVRFLND | TMVDPPASEW |  |  |  |
| 241 | FGYYRSGQTK | ETIPLQETTL  | YTEDRLGLKE | MDQAGKLVFL | GAEGDHLRFS | KEWFFK     | NIVP       | FLSDAAGDDS | QAVLS      |            |            |  |  |  |

Supporting Peptides:

| Peptide                        | Uniq | -10lgP | Mass      | Length | ppm | m/z      | z | RT    | Fraction | Scan     | Source File               | Area F1 | Area F2 |
|--------------------------------|------|--------|-----------|--------|-----|----------|---|-------|----------|----------|---------------------------|---------|---------|
| K.LQGGYNAMGFSQGGQFLR.A         | Y    | 84.07  | 1929.9155 | 18     | 0.4 | 965.9654 | 2 | 52.55 | 3        | F3:15482 | 17112021_RID_2349_DP3.raw |         | 1.037   |
| K.ETIPLQETTLTYTEDR.L           | Y    | 70.72  | 1807.8839 | 15     | 0.1 | 904.9493 | 2 | 48.94 | 2        | F2:13963 | 12112021_RID_2349_DP2.raw |         | 9.553   |
| R.SSLFLADINQER.V               | Y    | 67.59  | 1391.7045 | 12     | 0.3 | 696.8597 | 2 | 50.21 | 3        | F3:14633 | 17112021_RID_2349_DP3.raw |         | 1.288   |
| K.IPGIYVLSLK.I                 | Y    | 62.71  | 1101.6797 | 10     | 0.6 | 551.8475 | 2 | 57.36 | 3        | F3:16947 | 17112021_RID_2349_DP3.raw |         |         |
| K.NIVPFLSDAAGDDSQA.V           | Y    | 54.50  | 1618.7474 | 16     | 0.8 | 810.3817 | 2 | 64.67 | 3        | F3:19306 | 17112021_RID_2349_DP3.raw |         | 5.298   |
| K.HLVQAQYWHDPVNEQQYR.R         | Y    | 46.16  | 2310.0930 | 18     | 0.6 | 771.0388 | 3 | 40.68 | 3        | F3:11579 | 17112021_RID_2349_DP3.raw |         |         |
| K.LQGGYNAM(+15.99)GFSQGGQFLR.A | Y    | 39.61  | 1945.9104 | 18     | 0.7 | 973.9631 | 2 | 47.17 | 3        | F3:13705 | 17112021_RID_2349_DP3.raw |         |         |
| total 7 peptides               |      |        |           |        |     |          |   |       |          |          |                           |         |         |

TRINITY\_DN2646  
[back to list](#)

[Protein Coverage](#) | [Supporting Peptides](#) |  
Protein Coverage:

|     |            |             |            |            |            |            |            |            |            |            |            |  |  |  |
|-----|------------|-------------|------------|------------|------------|------------|------------|------------|------------|------------|------------|--|--|--|
| 1   | MAPGGWMLLA | GLLLLLLGGLD | RPSSGSAAGP | VPLVIWHGMG | DSCCNPLSMG | YIKKIVEEK  | I          | PGIYVLSLK  | I          | GNTLIDDMEN |            |  |  |  |
| 81  | SFFMDVNNQV | KKVCDQLSKD  | PK         | LQGGYNAM   | GFSQGGQFLR | AVVQRCPSPP | MFNLISIGGQ | HQGVFGFPHC | PGESSHLCDW |            |            |  |  |  |
| 161 | LRKVLNIAYT | DKIQK       | HLVQA      | QYWHDPVNEQ | QYR        | SSLFLA     | DINQER     | VINE       | TYKKNLMTLK | KEVMVRFLND | TMVDPPASEW |  |  |  |
| 241 | FGYYRSGQTK | ETIPLQETTL  | YTEDRLGLKE | MDQAGKLVFL | GAEGDHLRFS | KEWFFK     | NIVP       | FLSDAAGDDS | QAVLS      |            |            |  |  |  |

Supporting Peptides:

| Peptide                        | Uniq | -10lgP | Mass      | Length | ppm | m/z      | z | RT    | Fraction | Scan     | Source File               | Area F1 | Area F2 |
|--------------------------------|------|--------|-----------|--------|-----|----------|---|-------|----------|----------|---------------------------|---------|---------|
| K.LQGGYNAMGFSQGGQFLR.A         | Y    | 84.07  | 1929.9155 | 18     | 0.4 | 965.9654 | 2 | 52.55 | 3        | F3:15482 | 17112021_RID_2349_DP3.raw |         | 1.037   |
| K.ETIPLQETTLTYTEDR.L           | Y    | 70.72  | 1807.8839 | 15     | 0.1 | 904.9493 | 2 | 48.94 | 2        | F2:13963 | 12112021_RID_2349_DP2.raw |         | 9.553   |
| R.SSLFLADINQER.V               | Y    | 67.59  | 1391.7045 | 12     | 0.3 | 696.8597 | 2 | 50.21 | 3        | F3:14633 | 17112021_RID_2349_DP3.raw |         | 1.288   |
| K.IPGIYVLSLK.I                 | Y    | 62.71  | 1101.6797 | 10     | 0.6 | 551.8475 | 2 | 57.36 | 3        | F3:16947 | 17112021_RID_2349_DP3.raw |         |         |
| K.NIVPFLSDAAGDDSQA.V           | Y    | 54.50  | 1618.7474 | 16     | 0.8 | 810.3817 | 2 | 64.67 | 3        | F3:19306 | 17112021_RID_2349_DP3.raw |         | 5.298   |
| K.HLVQAQYWHDPVNEQQYR.R         | Y    | 46.16  | 2310.0930 | 18     | 0.6 | 771.0388 | 3 | 40.68 | 3        | F3:11579 | 17112021_RID_2349_DP3.raw |         |         |
| K.LQGGYNAM(+15.99)GFSQGGQFLR.A | Y    | 39.61  | 1945.9104 | 18     | 0.7 | 973.9631 | 2 | 47.17 | 3        | F3:13705 | 17112021_RID_2349_DP3.raw |         |         |
| total 7 peptides               |      |        |           |        |     |          |   |       |          |          |                           |         |         |

TRINITY\_DN300  
[back to list](#)

[Protein Coverage](#) | [Supporting Peptides](#) |  
Protein Coverage:

|     |                   |                    |                    |                    |                    |                   |                    |                    |  |
|-----|-------------------|--------------------|--------------------|--------------------|--------------------|-------------------|--------------------|--------------------|--|
| 1   | MAKSESQMDI        | TEMNSPKPKR         | KLRWSPLEIG         | LAADVLLLAI         | VAITMIILYA         | TYDDGICKTS        | DCIKSAARII         | ENMDTTAEPC         |  |
| 81  | SNFYQYACGG        | WLKKHIIPET         | SSRYSNFDIL         | RDELEVVLKD         | VLEKKDSNDI         | DAVAKAKTLY        | RSCINETAIN         | SKKGKPLINL         |  |
| 161 | MTNISEWPIA        | AESWDGSTWS         | AEK <b>SIAELNF</b> | <b>QFGR</b> KVIINM | FVGTDDKNSS         | QHVLHVDQPR        | LGLPSRDYIE         | CTGLYKEACS         |  |
| 241 | AYESFMTSVA        | KLIRQERNLP         | INDTEISIEA         | ERIMALEKEI         | ANVTTKDEDR         | NDPLLLYHKM        | KLSDLQKNFS         | MEINNKTFDW         |  |
| 321 | IKFVNNIMTT        | VAIEVKNTED         | IIVYAPEYLI         | KLKSVISKYS         | AR <b>EIQNYISW</b> | <b>RYIMDMVSSL</b> | <b>SR</b> EYKDRNN  | FRKVLYGTTS         |  |
| 401 | DAAIWRRCAN        | YVNSIMGNAV         | GR <b>LYVQEAF</b>  | <b>GESK</b> HVVQEM | ITQIREVFIK         | TLEELSWMDA        | KTKKKAEKA          | VAIKER <b>IGYP</b> |  |
| 481 | <b>DEILTNPVKL</b> | NQYKGLNYK          | EEEFENLIE          | NLKFGQKERL         | KKLREKVDKD         | EWITGAAVVN        | AFYSPNR <b>NQI</b> | <b>VFPAGILQPP</b>  |  |
| 561 | <b>FFSASQPKSL</b> | NFGGIGMVG          | HEITHGFDDN         | GRNFNAQGD          | LDVWSQESAN         | NFKSQSRCMI        | YQYGNFTWDL         | AGGQNLGIN          |  |
| 641 | TLGENIADNG        | GIRQAYR <b>AYE</b> | <b>SYVQK</b> NGEEK | RLPGLDLNHK         | QLFFLNFAQI         | WCGTYRPEYA        | VNSIK <b>TDVHS</b> | <b>PGKFR</b> VLGSL |  |
| 721 | QNNLEFSEAF        | KCTDKDYMDP         | VKKCRVW            |                    |                    |                   |                    |                    |  |

Supporting Peptides:

| Peptide                   | Uniq | -10lgP | Mass      | Length | ppm  | m/z       | z | RT    | Fraction | Scan     | Source File               | Area F1  | Area F2 | Ar F |
|---------------------------|------|--------|-----------|--------|------|-----------|---|-------|----------|----------|---------------------------|----------|---------|------|
| K.SIAELNFQFGR.K           | Y    | 73.70  | 1280.6512 | 11     | 0.1  | 641.3329  | 2 | 55.39 | 1        | F1:16912 | 12112021_RID_2349_DP1.raw | 5.654E4  |         |      |
| R.IGYPDEILTNPVK.L         | Y    | 70.66  | 1457.7766 | 13     | 0.2  | 729.8957  | 2 | 50.37 | 1        | F1:15355 | 12112021_RID_2349_DP1.raw | 5.763E5  |         |      |
| R.YIMDMVSSLSR.E           | Y    | 62.87  | 1300.6155 | 11     | 0.5  | 651.3153  | 2 | 54.99 | 1        | F1:16794 | 12112021_RID_2349_DP1.raw | 6.491E4  |         |      |
| R.AYESYVQK.N              | Y    | 61.21  | 986.4709  | 8      | -0.6 | 494.2424  | 2 | 26.11 | 1        | F1:7228  | 12112021_RID_2349_DP1.raw | 5.2803E5 |         |      |
| R.EIQNYISWR.Y             | Y    | 55.38  | 1207.5985 | 9      | 0.2  | 604.8066  | 2 | 48.42 | 1        | F1:14642 | 12112021_RID_2349_DP1.raw | 5.0876E4 |         |      |
| R.NQIVFPAGILQPPFFSASQPK.S | Y    | 53.84  | 2285.2207 | 21     | 1.1  | 1143.6189 | 2 | 71.77 | 1        | F1:22334 | 12112021_RID_2349_DP1.raw | 1.8483E5 |         |      |
| R.LYVQEAFAGESK.H          | Y    | 53.64  | 1340.6611 | 12     | 0.4  | 671.3381  | 2 | 42.18 | 1        | F1:12626 | 12112021_RID_2349_DP1.raw | 1.0438E5 |         |      |
| K.TDVHSPGKFR.V            | Y    | 49.57  | 1142.5833 | 10     | -0.4 | 381.8682  | 3 | 22.83 | 1        | F1:6017  | 12112021_RID_2349_DP1.raw | 1.6839E5 |         |      |

total 8 peptides

TRINITY\_DN300  
[back to list](#)

[Protein Coverage](#) | [Supporting Peptides](#) |  
Protein Coverage:

|     |                   |                    |                    |                    |                    |                   |                    |                    |  |
|-----|-------------------|--------------------|--------------------|--------------------|--------------------|-------------------|--------------------|--------------------|--|
| 1   | MAKSESQMDI        | TEMNSPKPKR         | KLRWSPLEIG         | LAADVLLLAI         | VAITMIILYA         | TYDDGICKTS        | DCIKSAARII         | ENMDTTAEPC         |  |
| 81  | SNFYQYACGG        | WLKKHIIPET         | SSRYSNFDIL         | RDELEVVLKD         | VLEKKDSNDI         | DAVAKAKTLY        | RSCINETAIN         | SKKGKPLINL         |  |
| 161 | MTNISEWPIA        | AESWDGSTWS         | AEK <b>SIAELNF</b> | <b>QFGR</b> KVIINM | FVGTDDKNSS         | QHVLHVDQPR        | LGLPSRDYIE         | CTGLYKEACS         |  |
| 241 | AYESFMTSVA        | KLIRQERNLP         | INDTEISIEA         | ERIMALEKEI         | ANVTTKDEDR         | NDPLLLYHKM        | KLSDLQKNFS         | MEINNKTFDW         |  |
| 321 | IKFVNNIMTT        | VAIEVKNTED         | IIVYAPEYLI         | KLKSVISKYS         | AR <b>EIQNYISW</b> | <b>RYIMDMVSSL</b> | <b>SR</b> EYKDRNN  | FRKVLYGTTS         |  |
| 401 | DAAIWRRCAN        | YVNSIMGNAV         | GR <b>LYVQEAF</b>  | <b>GESK</b> HVVQEM | ITQIREVFIK         | TLEELSWMDA        | KTKKKAEKA          | VAIKER <b>IGYP</b> |  |
| 481 | <b>DEILTNPVKL</b> | NQYKGLNYK          | EEEFENLIE          | NLKFGQKERL         | KKLREKVDKD         | EWITGAAVVN        | AFYSPNR <b>NQI</b> | <b>VFPAGILQPP</b>  |  |
| 561 | <b>FFSASQPKSL</b> | NFGGIGMVG          | HEITHGFDDN         | GRNFNAQGD          | LDVWSQESAN         | NFKSQSRCMI        | YQYGNFTWDL         | AGGQNLGIN          |  |
| 641 | TLGENIADNG        | GIRQAYR <b>AYE</b> | <b>SYVQK</b> NGEEK | RLPGLDLNHK         | QLFFLNFAQI         | WCGTYRPEYA        | VNSIK <b>TDVHS</b> | <b>PGKFR</b> VLGSL |  |
| 721 | QNNLEFSEAF        | KCTDKDYMDP         | VKKCRVW            |                    |                    |                   |                    |                    |  |

Supporting Peptides:

| Peptide           | Uniq | -10lgP | Mass      | Length | ppm  | m/z      | z | RT    | Fraction | Scan     | Source File               | Area F1  | Area F2 | Ar F |
|-------------------|------|--------|-----------|--------|------|----------|---|-------|----------|----------|---------------------------|----------|---------|------|
| K.SIAELNFQFGR.K   | Y    | 73.70  | 1280.6512 | 11     | 0.1  | 641.3329 | 2 | 55.39 | 1        | F1:16912 | 12112021_RID_2349_DP1.raw | 5.654E4  |         |      |
| R.IGYPDEILTNPVK.L | Y    | 70.66  | 1457.7766 | 13     | 0.2  | 729.8957 | 2 | 50.37 | 1        | F1:15355 | 12112021_RID_2349_DP1.raw | 5.763E5  |         |      |
| R.YIMDMVSSLSR.E   | Y    | 62.87  | 1300.6155 | 11     | 0.5  | 651.3153 | 2 | 54.99 | 1        | F1:16794 | 12112021_RID_2349_DP1.raw | 6.491E4  |         |      |
| R.AYESYVQK.N      | Y    | 61.21  | 986.4709  | 8      | -0.6 | 494.2424 | 2 | 26.11 | 1        | F1:7228  | 12112021_RID_2349_DP1.raw | 5.2803E5 |         |      |
| R.EIQNYISWR.Y     | Y    | 55.38  | 1207.5985 | 9      | 0.2  | 604.8066 | 2 | 48.42 | 1        | F1:14642 | 12112021_RID_2349_DP1.raw | 5.0876E4 |         |      |

total 8 peptides

| Peptide                    | Uniq -10lgP | Mass      | Length    | ppm | m/z       | z        | RT    | Fraction | Scan     | Source File               | Area F1                   | Area F2  | Area F3 |
|----------------------------|-------------|-----------|-----------|-----|-----------|----------|-------|----------|----------|---------------------------|---------------------------|----------|---------|
| R.NQIVFAGILQPPFFSASQPK.S Y | 53.84       | 2285.2207 | 21        | 1.1 | 1143.6189 | 2        | 71.77 | 1        | F1:22334 | 12112021_RID_2349_DP1.raw | 1.8483E5                  |          |         |
| R.LYVQEAFAFAGESK.H         | Y           | 53.64     | 1340.6611 | 12  | 0.4       | 671.3381 | 2     | 42.18    | 1        | F1:12626                  | 12112021_RID_2349_DP1.raw | 1.0438E5 |         |
| K.TDVHSPGKFR.V             | Y           | 49.57     | 1142.5833 | 10  | -0.4      | 381.8682 | 3     | 22.83    | 1        | F1:6017                   | 12112021_RID_2349_DP1.raw | 1.6839E5 |         |

total 8 peptides

B8K1W0.1  
[back to list](#)

[Protein Coverage](#) | [Supporting Peptides](#) |  
Protein Coverage:

|     |            |            |            |            |             |            |            |            |            |            |            |       |       |
|-----|------------|------------|------------|------------|-------------|------------|------------|------------|------------|------------|------------|-------|-------|
| 1   | MMQVLLVTIC | LAVFPYHGSS | IILESGNVND | YEVVYPQKVT | AMPKEAVKQP  | EQKYEDAMQY | KFEVNGEPLV | LHLEKNKDLF |            |            |            |       |       |
| 81  | SEDYSETHYS | PDGREITTKP | LVQDHCYYHG | HIQNDAHSSA | SISACNGLKG  | HFKLRGEMYL | IEPLKLSNSE | AHAVYKYENV |            |            |            |       |       |
| 161 | EKEDALKMC  | GV         | TQTNWESD   | EPIKKASLLV | ATSER       | NRYFN      | PYSYVELIIT | VDHSMVTKYK | NDLTAIR    | TWV        | FELVNTINEI |       |       |
| 241 | FKYLYIR    | VPL        | VGLEIWK    | NRD        | LINVTSAANV  | TLDLFGEWK  | K          | SYLLPRK    | IHD        | NSQLLTAIDL | NGLTIGMAYV | STMCQ | SKYSV |
| 321 | GVVQDHSK   | IN         | LRVAVTMAHE | IGHNLGLTHD | GVYCTCGGYS  | CIMSAVLGDQ | PSKYFSNCSY | NQYRRFLTEH | NPECIINPPL |            |            |       |       |
| 401 | RTDIVSPAC  | GNELLERGE  | EE         | CDCGSPENCR | DPCCDAASCK  | LHSWVECESG | KCCNQCRFKR | AGTECRPARD | ECDKAEQCTG |            |            |       |       |
| 481 | RSANCPVDEF | HENGRPCLHN | FGYCYNGKCP | IMYHQCHALF | GQNVTVGVQDS | CFQYNRLGVY | YAYCRKENGR | KIPCAPKDEK |            |            |            |       |       |
| 561 | CGRLYCSYKS | PGNQIPCLPY | YIPSDENKGM | VDHGTCKGDG | KVCSNGQCVD  | LNIAV      |            |            |            |            |            |       |       |

Supporting Peptides:

| Peptide           | Uniq | -10lgP | Mass      | Length | ppm  | m/z      | z | RT    | Fraction | Scan     | Source File               | Area F1  | Area F2  | Area F3  |
|-------------------|------|--------|-----------|--------|------|----------|---|-------|----------|----------|---------------------------|----------|----------|----------|
| K.YKNDLTAIR.T     | N    | 69.36  | 1092.5928 | 9      | 0.5  | 547.3040 | 2 | 30.48 | 1        | F1:8695  | 12112021_RID_2349_DP1.raw | 1.0161E6 | 3.056E5  | 9.9469E5 |
| K.ASLLVATSER.N    | Y    | 65.12  | 1045.5768 | 10     | -0.4 | 523.7955 | 2 | 35.52 | 1        | F1:10437 | 12112021_RID_2349_DP1.raw | 8.3446E5 |          |          |
| R.VPLVGLEIWK.N    | Y    | 64.06  | 1152.6907 | 10     | -0.3 | 577.3524 | 2 | 61.59 | 1        | F1:19008 | 12112021_RID_2349_DP1.raw | 1.8214E6 |          |          |
| R.KSYLLPR.K       | Y    | 52.02  | 875.5228  | 7      | 0.7  | 438.7690 | 2 | 31.78 | 1        | F1:9234  | 12112021_RID_2349_DP1.raw | 7.7747E6 |          |          |
| A.SLLVATSER.N     | Y    | 50.58  | 974.5396  | 9      | -0.5 | 488.2769 | 2 | 33.39 | 1        | F1:9720  | 12112021_RID_2349_DP1.raw | 6.4327E5 |          |          |
| V.TQTNWESDEPIKK.A | N    | 44.98  | 1574.7576 | 13     | 0.5  | 788.3865 | 2 | 30.75 | 1        | F1:8710  | 12112021_RID_2349_DP1.raw | 3.3503E5 |          | 7.2185E4 |
| K.NDLTAIR.T       | N    | 44.81  | 801.4344  | 7      | 0.3  | 401.7246 | 2 | 29.16 | 7        | F7:7605  | 17112021_RID_2349_DP7.raw | 1.0951E5 | 4.7012E4 |          |
| Q.SKYSVGVVQDHSK.I | Y    | 43.60  | 1432.7310 | 13     | -0.6 | 478.5840 | 3 | 27.74 | 1        | F1:7696  | 12112021_RID_2349_DP1.raw | 1.9427E5 |          |          |
| K.SYLLPRK.I       | Y    | 42.55  | 875.5228  | 7      | 0.2  | 438.7688 | 2 | 28.14 | 1        | F1:7822  | 12112021_RID_2349_DP1.raw | 1.2424E6 |          |          |
| K.YSVGVVQDHSK.I   | Y    | 42.32  | 1217.6040 | 11     | 0.5  | 406.8755 | 3 | 26.34 | 1        | F1:7230  | 12112021_RID_2349_DP1.raw | 2.3403E5 | 1.1059E5 |          |

total 10 peptides

AAZ39880.1  
[back to list](#)

[Protein Coverage](#) | [Supporting Peptides](#) |  
Protein Coverage:

|     |            |            |            |            |             |            |            |            |            |            |            |       |       |
|-----|------------|------------|------------|------------|-------------|------------|------------|------------|------------|------------|------------|-------|-------|
| 1   | MMQVLLVTIC | LAVFPYHGSS | IILESGNVND | YEVVYPQKVT | AMPKEAVKQP  | EQKYEDAMQY | KFEVNGEPLV | LHLEKNKDLF |            |            |            |       |       |
| 81  | SEDYSETHYS | PDGREITTKP | LVQDHCYYHG | HIQNDAHSSA | SISACNGLKG  | HFKLRGEMYL | IEPLKLSNSE | AHAVYKYENV |            |            |            |       |       |
| 161 | EKEDALKMC  | GV         | TQTNWESD   | EPIKKASLLV | ATSER       | NRYFN      | PYSYVELIIT | VDHSMVTKYK | NDLTAIR    | TWV        | FELVNTINEI |       |       |
| 241 | FKYLYIR    | VPL        | VGLEIWK    | NRD        | LINVTSAANV  | TLDLFGEWK  | K          | SYLLPRK    | IHD        | NSQLLTAIDL | NGLTIGMAYV | STMCQ | SKYSV |
| 321 | GVVQDHSK   | IN         | LRVAVTMAHE | IGHNLGLTHD | GVYCTCGGYS  | CIMSAVLGDQ | PSKYFSNCSY | NQYRRFLTEH | NPECIINPPL |            |            |       |       |
| 401 | RTDIVSPAC  | GNELLERGE  | EE         | CDCGSPENCR | DPCCDAASCK  | LHSWVECESG | KCCNQCRFKR | AGTECRPARD | ECDKAEQCTG |            |            |       |       |
| 481 | RSANCPVDEF | HENGRPCLHN | FGYCYNGKCP | IMYHQCHALF | GQNVTVGVQDS | CFQYNRLGVY | YAYCRKENGR | KIPCAPKDEK |            |            |            |       |       |
| 561 | CGRLYCSYKS | PGNQIPCLPY | YIPSDENKGM | VDHGTCKGDG | KVCSNGQCVD  | LNIAV      |            |            |            |            |            |       |       |

Supporting Peptides:

| Peptide       | Uniq | -10lgP | Mass      | Length | ppm | m/z      | z | RT    | Fraction | Scan    | Source                    | File     | Area F1 | Area F2  | Area F3 |
|---------------|------|--------|-----------|--------|-----|----------|---|-------|----------|---------|---------------------------|----------|---------|----------|---------|
| K.YKNDLTAIR.T | N    | 69.36  | 1092.5928 | 9      | 0.5 | 547.3040 | 2 | 30.48 | 1        | F1:8695 | 12112021_RID_2349_DP1.raw | 1.0161E6 | 3.056E5 | 9.9469E5 |         |

total 10 peptides

| Peptide           | Uniq -10lgP | Mass  | Length    | ppm | m/z  | z        | RT      | Fraction | Scan     | Source File               | Area F1  | Area F2  | Area F3  |
|-------------------|-------------|-------|-----------|-----|------|----------|---------|----------|----------|---------------------------|----------|----------|----------|
| K.ASLLVATSER.N    | Y           | 65.12 | 1045.5768 | 10  | -0.4 | 523.7955 | 2 35.52 | 1        | F1:10437 | 12112021_RID_2349_DP1.raw | 8.3446E5 |          |          |
| R.VPLVGLIWK.N     | Y           | 64.06 | 1152.6907 | 10  | -0.3 | 577.3524 | 2 61.59 | 1        | F1:19008 | 12112021_RID_2349_DP1.raw | 1.8214E6 |          |          |
| R.KSYLLPR.K       | Y           | 52.02 | 875.5228  | 7   | 0.7  | 438.7690 | 2 31.78 | 1        | F1:9234  | 12112021_RID_2349_DP1.raw | 7.7747E6 |          |          |
| A.SLLVATSER.N     | Y           | 50.58 | 974.5396  | 9   | -0.5 | 488.2769 | 2 33.39 | 1        | F1:9720  | 12112021_RID_2349_DP1.raw | 6.4327E5 |          |          |
| V.TQTNWESDEPIKK.A | N           | 44.98 | 1574.7576 | 13  | 0.5  | 788.3865 | 2 30.75 | 1        | F1:8710  | 12112021_RID_2349_DP1.raw | 3.3503E5 |          | 7.2185E4 |
| K.NDLTAIR.T       | N           | 44.81 | 801.4344  | 7   | 0.3  | 401.7246 | 2 29.16 | 7        | F7:7605  | 17112021_RID_2349_DP7.raw | 1.0951E5 | 4.7012E4 |          |
| Q.SKYSVGVVQDHSK.I | Y           | 43.60 | 1432.7310 | 13  | -0.6 | 478.5840 | 3 27.74 | 1        | F1:7696  | 12112021_RID_2349_DP1.raw | 1.9427E5 |          |          |
| K.SYLLPRK.I       | Y           | 42.55 | 875.5228  | 7   | 0.2  | 438.7688 | 2 28.14 | 1        | F1:7822  | 12112021_RID_2349_DP1.raw | 1.2424E6 |          |          |
| K.YSVGVVQDHSK.I   | Y           | 42.32 | 1217.6040 | 11  | 0.5  | 406.8755 | 3 26.34 | 1        | F1:7230  | 12112021_RID_2349_DP1.raw | 2.3403E5 | 1.1059E5 |          |
| total 10 peptides |             |       |           |     |      |          |         |          |          |                           |          |          |          |

ACE73567.1  
[back to list](#)

| [Protein Coverage](#) | [Supporting Peptides](#) |  
Protein Coverage:

1 MIAFIVLPIL AAVLQSSG**S VDFDSES**PRR PEIQNEIVDL HNSLR**RSVTP TASNMLKMEW YPEAAANAER** WAFRCILNHS 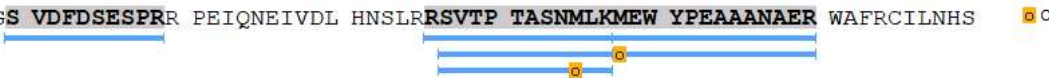

81 PYNSRVIGGI KCGENIYMSP YPMKWTAIH EWHKEKKDFV YGQGASPANA VVGHYTQIVW YKSYRSGCAA AYCPSSSEYNY

161 FYVCQYCPAG NIIGKIATPY TSGPPCGDCP SACDNGLCN PCSHHDEFTN CKDLVKQGCH SNYLKTKCPA SCFCHNEII

Supporting Peptides:

| Peptide                   | Uniq -10lgP      | Mass  | Length    | ppm       | m/z | z        | RT       | Fraction | Scan     | Source File               | Area F1                   | Area F2  | Area F3 |
|---------------------------|------------------|-------|-----------|-----------|-----|----------|----------|----------|----------|---------------------------|---------------------------|----------|---------|
| K.MEWYPEAAANAER.W         | N                | 85.56 | 1536.6667 | 13        | 0.5 | 769.3411 | 2 45.12  | 7        | F7:13118 | 17112021_RID_2349_DP7.raw |                           |          |         |
| K.M(+15.99)EWYPEAAANAER.W | N                | 83.36 | 1552.6616 | 13        | 0.4 | 777.3384 | 2 40.79  | 7        | F7:11501 | 17112021_RID_2349_DP7.raw |                           |          |         |
| G.SVDFDSES                | R                | N     | 67.58     | 1137.4938 | 10  | -0.1     | 569.7541 | 2 30.74  | 7        | F7:8132                   | 17112021_RID_2349_DP7.raw | 4.0226E4 |         |
| R.SVTP                    | TASNMLK.M        | Y     | 66.97     | 1147.5907 | 11  | 0.0      | 574.8026 | 2 33.55  | 7        | F7:9166                   | 17112021_RID_2349_DP7.raw |          |         |
| R.RSVTP                   | TASNMLK.M        | Y     | 56.72     | 1303.6918 | 12  | 0.4      | 652.8535 | 2 28.75  | 7        | F7:7373                   | 17112021_RID_2349_DP7.raw |          |         |
| R.SVTP                    | TASN(+15.99)LK.M | Y     | 41.99     | 1163.5856 | 11  | 0.4      | 582.8003 | 2 24.98  | 4        | F4:6074                   | 17112021_RID_2349_DP4.raw |          |         |
| total 6                   |                  |       |           |           |     |          |          |          |          |                           |                           |          |         |

TRINITY\_DN324  
[back to list](#)

| [Protein Coverage](#) | [Supporting Peptides](#) |  
Protein Coverage:

1 MAEAAAAETA ALFGLLLVLL LAPAALAAPG WAVPVDVRGD SVREAARFAL AEAFPEGHPR GLWALCGART QVNGIKHYL

81 EVVLLQSPCR RGEMADCDSP SGSLPLGKPE HVSCHFEVWS QPWASSKNLL KQDCHPTEPL TEIQAASLGP WETFPNLSPF

161 VDVAEASLRQ EESLQNVSAH LVSLFKDFLI TYRKSYLDDR ETQRR**FQIFA ENLERARLYQ ELDQGTAEYG VTKFSDLTEE**

241 **EFHSTYLNPL LAK**LPGRPME EASIPNGSFP EEWDWRDHGA VTEVKNQGE C SCWAFSVTG NIEGQWFLHK GTLLSLSEQE

321 LVDCDVIDKA CGGGLPSNAY EAIEK**LGGLE TER**DYSYQGF EQNCGFSREK VAVYINSSVG VSR**DESEIAA WLAK**NGPISI

401 ALNAFAMQFY RKGVSHPFPM LCNPWMIDHA VLLVGYGTR**G QIPFWAIKNS** WGEDWGEKGY YYLYRGKHAC GMNTMCSSAV

481 IN

Supporting Peptides:

| Peptide              | Uniq -10lgP | Mass  | Length    | ppm | m/z  | z        | RT      | Fraction | Scan     | Source File               | Area F1 | Area F2  | Area F3 |
|----------------------|-------------|-------|-----------|-----|------|----------|---------|----------|----------|---------------------------|---------|----------|---------|
| R.LYQELDQGTAEYGVTK.F | Y           | 91.90 | 1813.8734 | 16  | 0.9  | 907.9448 | 2 42.13 | 2        | F2:11774 | 12112021_RID_2349_DP2.raw |         | 6.0013E5 |         |
| R.DESEIAAWLAK.N      | Y           | 64.98 | 1231.6084 | 11  | 0.0  | 616.8115 | 2 58.67 | 2        | F2:17147 | 12112021_RID_2349_DP2.raw |         | 5.887E4  | 3.37    |
| R.GQIPFWAIK.N        | Y           | 50.17 | 1058.5913 | 9   | 0.3  | 530.3031 | 2 54.72 | 3        | F3:16090 | 17112021_RID_2349_DP3.raw |         |          | 8.69    |
| K.LGGLETER.D         | Y           | 50.13 | 873.4556  | 8   | -0.2 | 437.7350 | 2 26.62 | 2        | F2:6331  | 12112021_RID_2349_DP2.raw |         | 2.0992E5 | 6.12    |
| R.FQIFAENLER.A       | Y           | 44.23 | 1265.6404 | 10  | 0.2  | 633.8276 | 2 51.63 | 2        | F2:14817 | 12112021_RID_2349_DP2.raw |         | 2.5367E5 |         |
| total 6 peptides     |             |       |           |     |      |          |         |          |          |                           |         |          |         |

| Peptide                   | Uniq -10lgP | Mass      | Length | ppm | m/z      | z | RT    | Fraction | Scan     | Source File               | Area F1 | Area F2  | Area F3 |
|---------------------------|-------------|-----------|--------|-----|----------|---|-------|----------|----------|---------------------------|---------|----------|---------|
| K.FSDLTEEEFHSTYLNPLLA.L Y | 41.38       | 2353.1477 | 20     | 0.6 | 785.3903 | 3 | 58.68 | 2        | F2:17169 | 12112021_RID_2349_DP2.raw |         | 3.9261E5 |         |
| total 6 peptides          |             |           |        |     |          |   |       |          |          |                           |         |          |         |

TRINITY\_DN441  
[back to list](#)

| [Protein Coverage](#) | [Supporting Peptides](#) |  
Protein Coverage:

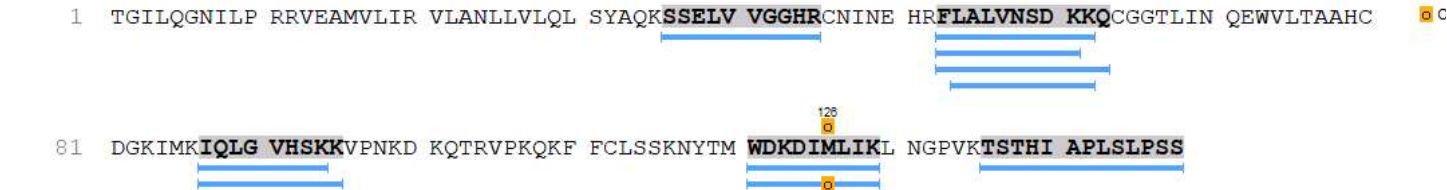

Supporting Peptides:

| Peptide               | Uniq | -10lgP | Mass      | Length | ppm  | m/z      | z | RT    | Fraction | Scan     | Source File               | Area F1  | Area F2  | Area F3  |
|-----------------------|------|--------|-----------|--------|------|----------|---|-------|----------|----------|---------------------------|----------|----------|----------|
| K.TSTHIAPLSLPSS       | N    | 60.21  | 1309.6877 | 13     | -0.1 | 655.8511 | 2 | 44.76 | 4        | F4:12858 | 17112021_RID_2349_DP4.raw |          |          |          |
| R.FLALVNSDKK.Q        | Y    | 57.18  | 1133.6444 | 10     | 0.1  | 567.8295 | 2 | 34.21 | 2        | F2:9023  | 12112021_RID_2349_DP2.raw | 8.9311E6 | 4.923E6  |          |
| M.WDKDIMLIK.L         | N    | 57.12  | 1160.6263 | 9      | -0.1 | 581.3204 | 2 | 46.64 | 2        | F2:13338 | 12112021_RID_2349_DP2.raw | 2.1169E5 | 9.915E6  | 1.5104E6 |
| K.SSELVVGHR.C         | Y    | 56.70  | 1039.5410 | 10     | -0.1 | 520.7777 | 2 | 21.39 | 3        | F3:4900  | 17112021_RID_2349_DP3.raw |          |          | 2.3028E6 |
| R.FLALVNSDK.K         | Y    | 53.75  | 1005.5494 | 9      | -0.6 | 503.7817 | 2 | 41.29 | 5        | F5:11774 | 17112021_RID_2349_DP5.raw | 3.9766E6 | 2.0733E6 |          |
| M.WDKDIM(+15.99)LIK.L | N    | 52.20  | 1176.6212 | 9      | -0.2 | 589.3177 | 2 | 41.27 | 2        | F2:11445 | 12112021_RID_2349_DP2.raw | 6.6323E6 | 2.1157E6 |          |
| K.IQLGVHSHK.V         | N    | 42.78  | 1008.6080 | 9      | 0.2  | 505.3113 | 2 | 18.69 | 3        | F3:4026  | 17112021_RID_2349_DP3.raw |          |          | 5.2609E6 |
| K.IQLGVHSHK.K         | N    | 40.36  | 880.5131  | 8      | -0.5 | 441.2636 | 2 | 23.29 | 1        | F1:6181  | 12112021_RID_2349_DP1.raw | 3.6053E6 | 1.5875E7 | 1.7023E6 |
| R.FLALVNSDKKQ.C       | Y    | 39.83  | 1261.7030 | 11     | -0.2 | 631.8586 | 2 | 33.21 | 3        | F3:8944  | 17112021_RID_2349_DP3.raw |          |          | 7.979E6  |
| F.LALVNSDKK.Q         | Y    | 38.72  | 986.5760  | 9      | -0.8 | 494.2949 | 2 | 33.30 | 3        | F3:8929  | 17112021_RID_2349_DP3.raw |          |          | 2.4679E6 |
| total 10              |      |        |           |        |      |          |   |       |          |          |                           |          |          |          |

AUF41660.1  
[back to list](#)

| [Protein Coverage](#) | [Supporting Peptides](#) |  
Protein Coverage:

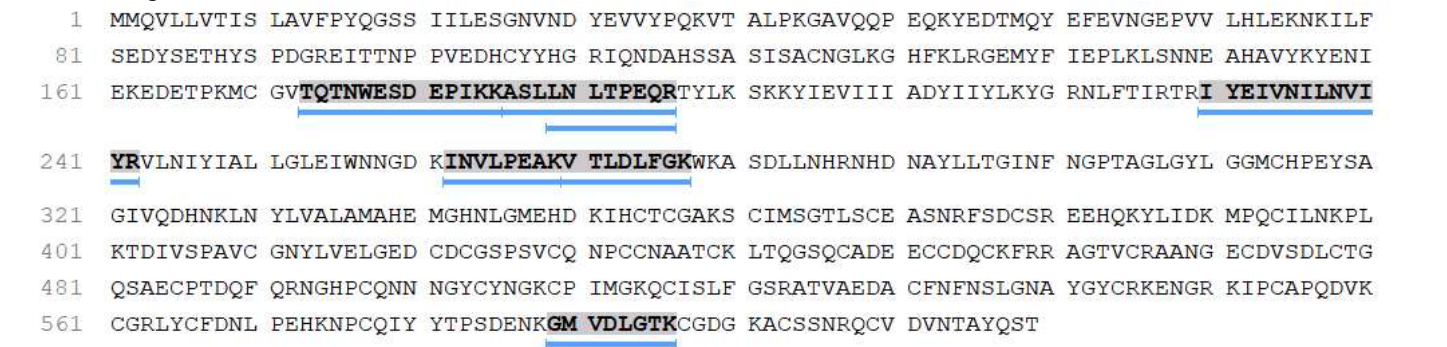

Supporting Peptides:

| Peptide           | Uniq | -10lgP | Mass      | Length | ppm  | m/z      | z | RT    | Fraction | Scan     | Source File               | Area F1  | Area F2  | Area F3  |
|-------------------|------|--------|-----------|--------|------|----------|---|-------|----------|----------|---------------------------|----------|----------|----------|
| R.IYEIVNINLVIYR.V | N    | 76.22  | 1620.9238 | 13     | 0.7  | 811.4697 | 2 | 75.23 | 4        | F4:22905 | 17112021_RID_2349_DP4.raw |          |          | 1.5149E6 |
| K.VTLDLFGK.W      | N    | 54.13  | 891.5065  | 8      | -0.2 | 446.7604 | 2 | 51.79 | 1        | F1:15754 | 12112021_RID_2349_DP1.raw | 8.9865E6 | 9.162E6  | 4.6551E7 |
| K.ASLLNLTPEQR.T   | Y    | 49.74  | 1240.6775 | 11     | -0.1 | 621.3459 | 2 | 44.70 | 7        | F7:12940 | 17112021_RID_2349_DP7.raw |          |          |          |
| K.INVLPEAK.V      | N    | 47.44  | 882.5175  | 8      | 0.8  | 442.2664 | 2 | 35.58 | 1        | F1:10479 | 12112021_RID_2349_DP1.raw | 8.9247E6 | 1.1229E7 | 4.4088E7 |
| V.TQTNWESDEPIKK.A | N    | 44.98  | 1574.7576 | 13     | 0.5  | 788.3865 | 2 | 30.75 | 1        | F1:8710  | 12112021_RID_2349_DP1.raw | 3.3503E5 |          | 7.2185E4 |
| K.GMVDLGTK.C      | N    | 44.20  | 819.4160  | 8      | 0.0  | 410.7153 | 2 | 30.74 | 7        | F7:8124  | 17112021_RID_2349_DP7.raw |          |          |          |
| L.LNLTPEQR.T      | N    | 41.26  | 969.5243  | 8      | 0.0  | 485.7694 | 2 | 30.89 | 7        | F7:8269  | 17112021_RID_2349_DP7.raw | 4.4645E5 |          |          |
| total 7 peptides  |      |        |           |        |      |          |   |       |          |          |                           |          |          |          |

CAR40186.1

Protein Coverage:

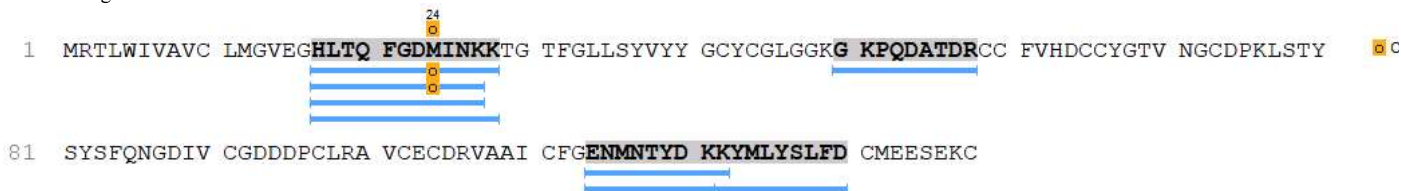

| Peptide                  | Uniq | -10lgP | Mass      | Length | ppm  | m/z      | z | RT    | Fraction | Scan     | Source File               | Area F1  | Area F2  | Area F3  |
|--------------------------|------|--------|-----------|--------|------|----------|---|-------|----------|----------|---------------------------|----------|----------|----------|
| G.HLTQFGDMINKK.T         | Y    | 78.52  | 1430.7340 | 12     | 0.0  | 477.9186 | 3 | 34.29 | 7        | F7:9506  | 17112021_RID_2349_DP7.raw | 2.9174E6 | 3.5177E6 | 2.0754E6 |
| G.HLTQFGDMINK.K          | Y    | 74.36  | 1302.6390 | 11     | -0.1 | 652.3267 | 2 | 37.85 | 7        | F7:10612 | 17112021_RID_2349_DP7.raw | 1.8546E6 | 6.6203E5 | 4.4203E5 |
| G.HLTQFGDM(+15.99)INK.K  | Y    | 69.44  | 1318.6339 | 11     | -0.1 | 660.3242 | 2 | 37.85 | 7        | F7:10613 | 17112021_RID_2349_DP7.raw | 4.5507E5 | 3.4443E5 | 1.0754E5 |
| G.HLTQFGDM(+15.99)INKK.T | Y    | 68.29  | 1446.7289 | 12     | -0.4 | 483.2501 | 3 | 26.61 | 7        | F7:6724  | 17112021_RID_2349_DP7.raw | 2.9583E6 | 2.0754E6 | 8.7500E5 |
| G.ENMNTYDK.K             | N    | 52.21  | 1013.4124 | 8      | 0.7  | 507.7138 | 2 | 19.60 | 7        | F7:4282  | 17112021_RID_2349_DP7.raw |          |          |          |
| K.GKPQDATDR.C            | N    | 48.61  | 986.4781  | 9      | -0.5 | 494.2461 | 2 | 11.50 | 7        | F7:1839  | 17112021_RID_2349_DP7.raw |          |          |          |
| G.ENMNTYDKK.Y            | N    | 43.49  | 1141.5073 | 9      | -0.1 | 571.7609 | 2 | 15.11 | 7        | F7:2868  | 17112021_RID_2349_DP7.raw |          |          |          |
| K.KYMLYSLFD.C            | N    | 43.04  | 1178.5681 | 9      | 0.2  | 590.2914 | 2 | 60.72 | 7        | F7:18383 | 17112021_RID_2349_DP7.raw |          |          |          |

Protein Coverage:

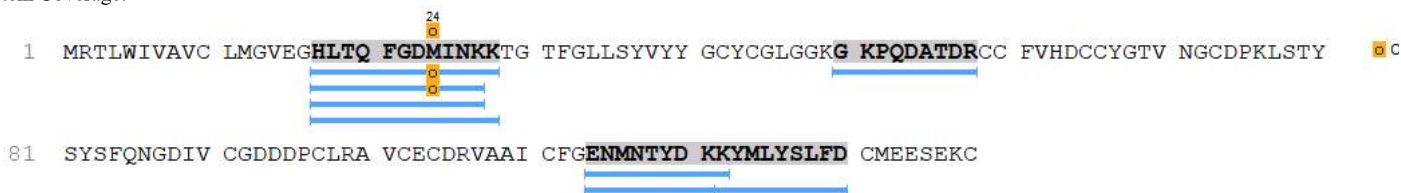

| Peptide                  | Uniq | -10lgP | Mass      | Length | ppm  | m/z      | z | RT    | Fraction | Scan     | Source File               | Area F1  | Area F2  | Area F3  |
|--------------------------|------|--------|-----------|--------|------|----------|---|-------|----------|----------|---------------------------|----------|----------|----------|
| G.HLTQFGDMINKK.T         | Y    | 78.52  | 1430.7340 | 12     | 0.0  | 477.9186 | 3 | 34.29 | 7        | F7:9506  | 17112021_RID_2349_DP7.raw | 2.9174E6 | 3.5177E6 | 2.0754E6 |
| G.HLTQFGDMINK.K          | Y    | 74.36  | 1302.6390 | 11     | -0.1 | 652.3267 | 2 | 37.85 | 7        | F7:10612 | 17112021_RID_2349_DP7.raw | 1.8546E6 | 6.6203E5 | 4.4237E5 |
| G.HLTQFGDM(+15.99)INK.K  | Y    | 69.44  | 1318.6339 | 11     | -0.1 | 660.3242 | 2 | 37.85 | 7        | F7:10613 | 17112021_RID_2349_DP7.raw | 4.5507E5 | 3.4443E5 | 1.0754E5 |
| G.HLTQFGDM(+15.99)INKK.T | Y    | 68.29  | 1446.7289 | 12     | -0.4 | 483.2501 | 3 | 26.61 | 7        | F7:6724  | 17112021_RID_2349_DP7.raw | 2.9583E6 | 2.0754E6 | 8.7500E5 |
| G.ENMNTYDK.K             | N    | 52.21  | 1013.4124 | 8      | 0.7  | 507.7138 | 2 | 19.60 | 7        | F7:4282  | 17112021_RID_2349_DP7.raw |          |          |          |
| K.GKPQDATDR.C            | N    | 48.61  | 986.4781  | 9      | -0.5 | 494.2461 | 2 | 11.50 | 7        | F7:1839  | 17112021_RID_2349_DP7.raw |          |          |          |
| G.ENMNTYDKK.Y            | N    | 43.49  | 1141.5073 | 9      | -0.1 | 571.7609 | 2 | 15.11 | 7        | F7:2868  | 17112021_RID_2349_DP7.raw |          |          |          |
| K.KYMLYSLFDC             | N    | 43.04  | 1178.5681 | 9      | 0.2  | 590.2914 | 2 | 60.72 | 7        | F7:18383 | 17112021_RID_2349_DP7.raw |          |          |          |

Protein Coverage:

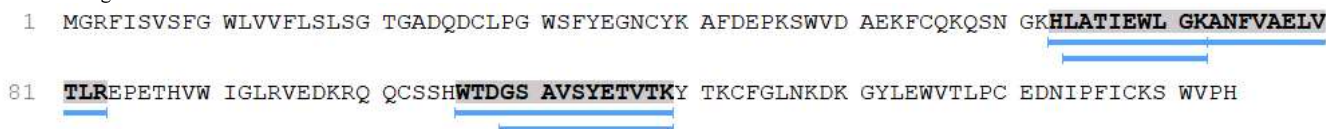

| Peptide | Uniq -10lgP | Mass | Length | ppm | m/z | z | RT | Fraction | Scan | Source File | Area F1 | Area F2 | Area F3 | Area F4 |
|---------|-------------|------|--------|-----|-----|---|----|----------|------|-------------|---------|---------|---------|---------|
|---------|-------------|------|--------|-----|-----|---|----|----------|------|-------------|---------|---------|---------|---------|

**total 5 peptides**

| Peptide            | Uniq | -10lgP | Mass      | Length | ppm  | m/z      | z | RT    | Fraction | Scan     | Source File               | Area F1 | Area F2 | Area F3 | Area F4  |
|--------------------|------|--------|-----------|--------|------|----------|---|-------|----------|----------|---------------------------|---------|---------|---------|----------|
| K.HLATIEWLGK.A     | N    | 75.80  | 1166.6448 | 10     | 0.6  | 584.3300 | 2 | 45.31 | 7        | F7:13096 | 17112021_RID_2349_DP7.raw |         |         |         |          |
| K.ANFVAELVTLR.E    | Y    | 67.48  | 1231.6924 | 11     | 0.3  | 616.8536 | 2 | 60.68 | 6        | F6:18179 | 17112021_RID_2349_DP6.raw |         |         |         | 9.8423E4 |
| D.GSAVSYETVTK.Y    | N    | 57.05  | 1140.5663 | 11     | 0.1  | 571.2905 | 2 | 28.66 | 6        | F6:7260  | 17112021_RID_2349_DP6.raw |         |         |         |          |
| H.LATIEWLGK.A      | N    | 49.74  | 1029.5858 | 9      | -0.3 | 515.8000 | 2 | 50.89 | 7        | F7:15056 | 17112021_RID_2349_DP7.raw |         |         |         |          |
| H.WTDGSAVSYETVTK.Y | N    | 45.93  | 1542.7202 | 14     | 0.5  | 772.3678 | 2 | 39.78 | 6        | F6:11115 | 17112021_RID_2349_DP6.raw |         |         |         |          |

total 5 peptides

TRINITY\_DN278  
[back to list](#)

[Protein Coverage](#) | [Supporting Peptides](#) |  
Protein Coverage:

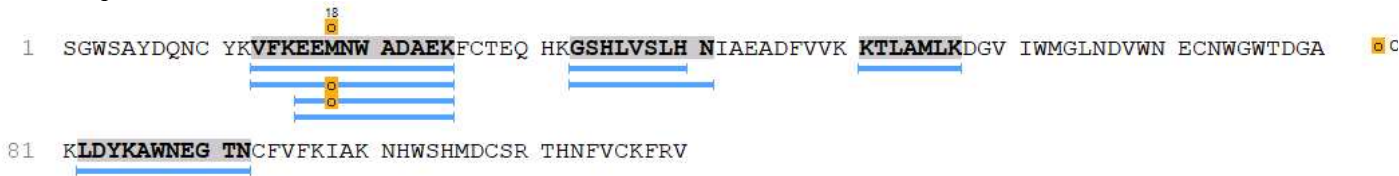

Supporting Peptides:

| Peptide                    | Uniq | -10lgP | Mass      | Length | ppm  | m/z      | z | RT    | Fraction | Scan     | Source File               | Area F1 | Area F2 | Area F3 | A   |
|----------------------------|------|--------|-----------|--------|------|----------|---|-------|----------|----------|---------------------------|---------|---------|---------|-----|
| K.VFKEEMNWADA EK.F         | Y    | 78.10  | 1595.7290 | 13     | 0.4  | 798.8721 | 2 | 40.09 | 7        | F7:11338 | 17112021_RID_2349_DP7.raw |         |         |         | 1.4 |
| K.EEMNWADA EK.F            | N    | 64.38  | 1221.4972 | 10     | 0.6  | 611.7562 | 2 | 36.04 | 7        | F7:10022 | 17112021_RID_2349_DP7.raw |         |         |         |     |
| K.VFKEEM(+15.99)NWADA EK.F | Y    | 62.41  | 1611.7239 | 13     | 0.5  | 806.8696 | 2 | 33.88 | 7        | F7:9194  | 17112021_RID_2349_DP7.raw |         |         |         |     |
| K.LDYKAWNEG TN.C           | N    | 59.40  | 1309.5939 | 11     | -0.2 | 655.8041 | 2 | 39.53 | 7        | F7:11171 | 17112021_RID_2349_DP7.raw |         |         |         |     |
| K.KTLAMLK.D                | N    | 50.24  | 803.4939  | 7      | 0.4  | 402.7544 | 2 | 24.60 | 7        | F7:5931  | 17112021_RID_2349_DP7.raw |         |         |         |     |
| K.EEM(+15.99)NWADA EK.F    | N    | 48.33  | 1237.4921 | 10     | 0.6  | 619.7537 | 2 | 28.66 | 7        | F7:7336  | 17112021_RID_2349_DP7.raw |         |         |         |     |
| K.GSHLVSLHN.I              | N    | 46.52  | 962.4933  | 9      | -0.1 | 482.2539 | 2 | 23.67 | 7        | F7:5711  | 17112021_RID_2349_DP7.raw |         |         |         |     |
| K.GSHLVSLH.N               | N    | 45.55  | 848.4504  | 8      | 0.0  | 425.2325 | 2 | 23.74 | 7        | F7:5731  | 17112021_RID_2349_DP7.raw |         |         |         |     |

total 8 peptides

AJO70723.1  
[back to list](#)

[Protein Coverage](#) | [Supporting Peptides](#) |  
Protein Coverage:

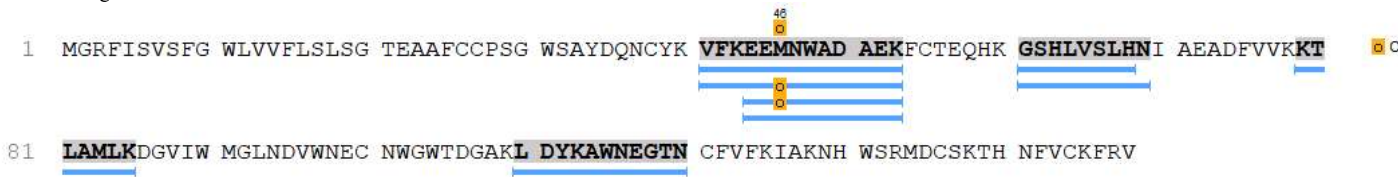

Supporting Peptides:

| Peptide                    | Uniq | -10lgP | Mass      | Length | ppm  | m/z      | z | RT    | Fraction | Scan     | Source File               | Area F1 | Area F2 | Area F3 | A   |
|----------------------------|------|--------|-----------|--------|------|----------|---|-------|----------|----------|---------------------------|---------|---------|---------|-----|
| K.VFKEEMNWADA EK.F         | Y    | 78.10  | 1595.7290 | 13     | 0.4  | 798.8721 | 2 | 40.09 | 7        | F7:11338 | 17112021_RID_2349_DP7.raw |         |         |         | 1.4 |
| K.EEMNWADA EK.F            | N    | 64.38  | 1221.4972 | 10     | 0.6  | 611.7562 | 2 | 36.04 | 7        | F7:10022 | 17112021_RID_2349_DP7.raw |         |         |         |     |
| K.VFKEEM(+15.99)NWADA EK.F | Y    | 62.41  | 1611.7239 | 13     | 0.5  | 806.8696 | 2 | 33.88 | 7        | F7:9194  | 17112021_RID_2349_DP7.raw |         |         |         |     |
| K.LDYKAWNEG TN.C           | N    | 59.40  | 1309.5939 | 11     | -0.2 | 655.8041 | 2 | 39.53 | 7        | F7:11171 | 17112021_RID_2349_DP7.raw |         |         |         |     |
| K.KTLAMLK.D                | N    | 50.24  | 803.4939  | 7      | 0.4  | 402.7544 | 2 | 24.60 | 7        | F7:5931  | 17112021_RID_2349_DP7.raw |         |         |         |     |
| K.EEM(+15.99)NWADA EK.F    | N    | 48.33  | 1237.4921 | 10     | 0.6  | 619.7537 | 2 | 28.66 | 7        | F7:7336  | 17112021_RID_2349_DP7.raw |         |         |         |     |
| K.GSHLVSLHN.I              | N    | 46.52  | 962.4933  | 9      | -0.1 | 482.2539 | 2 | 23.67 | 7        | F7:5711  | 17112021_RID_2349_DP7.raw |         |         |         |     |
| K.GSHLVSLH.N               | N    | 45.55  | 848.4504  | 8      | 0.0  | 425.2325 | 2 | 23.74 | 7        | F7:5731  | 17112021_RID_2349_DP7.raw |         |         |         |     |

total 8 peptides

XP\_034272439.1  
[back to list](#)

[Protein Coverage](#) | [Supporting Peptides](#) |

Protein Coverage:

|     |            |            |             |            |            |            |            |             |            |            |
|-----|------------|------------|-------------|------------|------------|------------|------------|-------------|------------|------------|
| 1   | MNTYSFRQSS | SNIGGGGFGG | SSSFRTPSIH  | GGSGGYGISV | SSARLASSGF | GGSLGGGYGG | GYGGGSFNFG | SGCFGGAGGA  |            |            |
| 81  | GGNINASDGL | LSGNEK     | VTMQ        | NLNDR      | LANYL      | DKVR       | ALEEA      | TELEVK      | IREW       | YQKQGPTATR |
| 161 | IENNKMILQI | DNARLAADDF | KTKFETE     | QAL        | RMSVEADING | LRR        | VLDELTL    | ARTDLELQIE  | SLKEELAYLK | KNHEEEMSAL |
| 241 | SGQLGGQVSV | EVDSAPGIDL | TKILADMRDQ  | YELLADKNRR | DAEAWFTSKT | EELTKEVAIN | TEQLQTSKTE | ITDLRRTLQG  |            |            |
| 321 | LEIELQSQLS | MKSALEGTLG | DTEARYGAQL  | CQIQSLISNL | EAQLVDVRS  | MERQNNYKM  | LMDIKSRLEQ | IEITYRQLLD  |            |            |
| 401 | GQDFNFSGNA | SGMYGKTKQL | LATSLEDYPL  | RYAQIFNTQI | SMAGIIEWTQ | LELDNLDQKT | RKLMTMHCA  | LHPKSDIDQLY |            |            |
| 481 | LPRSQDGKGL | LQVKQTVEEE | KHSLNDYIQK  | EKEPLLKETK | PSNSLASELS | FTMSHYQSS  | SSSYGGGGGG | GSGRVASVRH  |            |            |
| 561 | GPSSIHGGAG | GRVSASSARF | VSSSGSGYGGG | YGYGSGLG   | CAIGYGSVGG | LGYGNYFGSS | GGYGGGVGGG | YGCYGGGGY   |            |            |
| 641 | GGVGGGYGGG | LDVVGGGGG  | GDGGLLTGNE  | KITMQNLNDR | LANYLDKVR  | LEEANTELEI | KIRDWHQQA  | PSSPAKDYS   |            |            |
| 721 | YYKIISDLRD | KIHDAIDNS  | RTILEIDNAR  | LAADDFRLK  | Y          | ENELHLRQGV | ESDINGLRRV | LDELTLFKSD  | MEMQIEEK   | E          |
| 801 | DLAYLKKNHE | ELMKEFSTQL | TGKVSVMEDA  | APGVDLT    | KIL        | ADMREQYEQM | AERNRKDAEA | WFFTKEELN   | REVATHT    | EQ         |
| 881 | QTSKTEISEL | RTIQSLEIE  | LQSLSMKAG   | LETSLAETEG | RYCAQLAQIQ | NLITNVEEQ  | AELRNDMERQ | NHEYRMLMDI  |            |            |
| 961 | KTRLEQE    | IAT        | YR          | NLLEGQDS   | KLPGWSPKDA | TYGGSSTINY | SSGSGSGGG  | GAISGSGYSS  | GGSSVTTSKV | RS         |

Supporting Peptides:

| Peptide               | Uniq | -10lgP | Mass      | Length | ppm  | m/z      | z | RT    | Fraction | Scan     | Source File               | Area F1  | Area F2  | Area   |
|-----------------------|------|--------|-----------|--------|------|----------|---|-------|----------|----------|---------------------------|----------|----------|--------|
| K.VTMQNLNDR.L         | N    | 68.95  | 1089.5237 | 9      | 0.0  | 545.7691 | 2 | 27.78 | 6        | F6:7010  | 17112021_RID_2349_DP6.raw | 1.3099E6 | 6.7229E5 | 5.3516 |
| R.ALEEA               | N    | 67.86  | 1344.6772 | 12     | 0.3  | 673.3461 | 2 | 36.35 | 6        | F6:9844  | 17112021_RID_2349_DP6.raw |          |          |        |
| K.VTM(+15.99)QNLNDR.L | N    | 67.75  | 1105.5186 | 9      | -0.5 | 553.7663 | 2 | 28.09 | 1        | F1:7841  | 12112021_RID_2349_DP1.raw | 7.8553E5 | 3.4355E5 | 1.1259 |
| R.VLDELTLAR.T         | Y    | 63.40  | 1028.5865 | 9      | 1.0  | 515.3011 | 2 | 44.76 | 7        | F7:12937 | 17112021_RID_2349_DP7.raw | 5.1514E5 | 3.8767E5 | 3.8979 |
| K.TRLEQE              | N    | 60.70  | 1378.7205 | 11     | -0.1 | 690.3674 | 2 | 36.59 | 4        | F4:9988  | 17112021_RID_2349_DP4.raw |          | 4.6159E4 |        |
| R.LEQE                | N    | 59.72  | 1121.5717 | 9      | -0.1 | 561.7930 | 2 | 32.42 | 6        | F6:8521  | 17112021_RID_2349_DP6.raw | 2.3192E4 |          |        |
| R.LAADDFRLK.Y         | N    | 56.97  | 1047.5713 | 9      | 0.6  | 524.7932 | 2 | 38.21 | 1        | F1:11342 | 12112021_RID_2349_DP1.raw | 4.5823E5 |          |        |
| R.LAADDFR.L           | N    | 55.06  | 806.3922  | 7      | 0.0  | 404.2034 | 2 | 31.43 | 2        | F2:8068  | 12112021_RID_2349_DP2.raw | 2.1578E6 | 1.4275E6 | 3.7768 |
| total                 |      |        |           |        |      |          |   |       |          |          |                           |          |          |        |

QBF53416.1

[back to list](#)

[Protein Coverage](#) | [Supporting Peptides](#) |

Protein Coverage:

|     |            |            |            |            |            |            |          |     |            |       |
|-----|------------|------------|------------|------------|------------|------------|----------|-----|------------|-------|
| 1   | MIQVLLVIIC | LAVFPYQVSS | IILESGNINN | YEVVYPQKVT | ALPKGAIQQL | EQKYEDAMQY | QFKVKGE  | PPV | LHLEKNK    | DFF   |
| 81  | PEDYSETHYS | PDDREITTNP | PVEDHCYYYG | HIQNDADSTA | SISACNGLKG | YFTLRGVTYL | IEPLKIP  | ESE | AHAIYK     | YENV  |
| 161 | EKEDEDPKK  | C          | EFRRAGTECR | PARSECDVAE | YCTGQSAECP | TDVFHNSGKP | CLNNFGY  | CYN | GNCPIMY    | HQC   |
| 241 | GQDGC      | FEW        | NK         | KGESYFYCRK | ENDVPIPCAP | EDIKCGRLFC | ELIKNTCK | YD  | YSEDPDYGMV | DHGTK |
| 321 | TTAY       |            |            |            |            |            |          |     |            |       |

Supporting Peptides:

| Peptide                       | Uniq | -10lgP | Mass      | Length | ppm | m/z      | z | RT    | Fraction | Scan     | Source File               | Area F1  | Area F2 | Area |
|-------------------------------|------|--------|-----------|--------|-----|----------|---|-------|----------|----------|---------------------------|----------|---------|------|
| K.YDYSEDPDYGMVDHGTK.C         | N    | 86.45  | 1990.7891 | 17     | 0.5 | 996.4023 | 2 | 37.41 | 4        | F4:10370 | 17112021_RID_2349_DP4.raw |          |         |      |
| E.DPDYGM(+15.99)VDHGTK.C      | N    | 72.65  | 1349.5558 | 12     | 0.3 | 675.7854 | 2 | 22.45 | 4        | F4:5264  | 17112021_RID_2349_DP4.raw |          |         | 1.1  |
| E.DPDYGMVDHGTK.C              | N    | 64.82  | 1333.5608 | 12     | 0.6 | 667.7881 | 2 | 28.50 | 3        | F3:7288  | 17112021_RID_2349_DP3.raw | 1.1371E6 |         |      |
| K.YDYSEDPDYGM(+15.99)VDHGTK.C | N    | 61.79  | 2006.7839 | 17     | 0.2 | 669.9354 | 3 | 32.76 | 4        | F4:8703  | 17112021_RID_2349_DP4.raw |          |         |      |
| D.PDYGMVDHGTK.C               | N    | 55.63  | 1218.5339 | 11     | 0.9 | 407.1856 | 3 | 24.91 | 5        | F5:6050  | 17112021_RID_2349_DP5.raw |          |         |      |

| Peptide           | Uniq | -10lgP | Mass      | Length | ppm  | m/z      | z | RT    | Fraction | Scan    | Source File               | Area F1 | Area F2 | Area F3 | Area F4 | Area F5 |
|-------------------|------|--------|-----------|--------|------|----------|---|-------|----------|---------|---------------------------|---------|---------|---------|---------|---------|
| K.YENVEKEDEDPKK.C | Y    | 51.92  | 1621.7471 | 13     | -0.1 | 541.5896 | 3 | 17.62 | 4        | F4:3552 | 17112021_RID_2349_DP4.raw |         |         |         |         |         |

TRINITY\_DN59  
[back to list](#)

| [Protein Coverage](#) | [Supporting Peptides](#) |  
Protein Coverage:

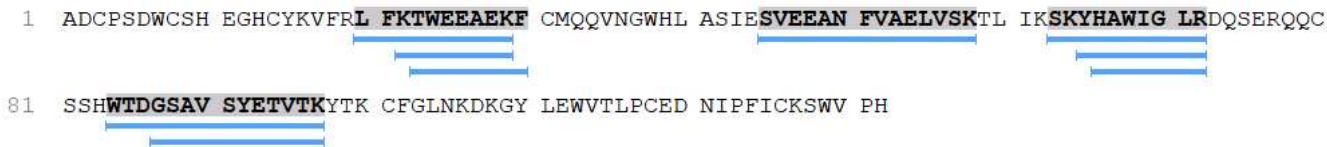

Supporting Peptides:

| Peptide            | Uniq | -10lgP | Mass      | Length | ppm  | m/z      | z | RT    | Fraction | Scan     | Source File               | Area F1 | Area F2 | Area F3 | Area F4 | Area F5 |
|--------------------|------|--------|-----------|--------|------|----------|---|-------|----------|----------|---------------------------|---------|---------|---------|---------|---------|
| E.SVEEANFVAELVSK.T | Y    | 64.69  | 1520.7722 | 14     | 0.7  | 761.3939 | 2 | 57.97 | 6        | F6:17304 | 17112021_RID_2349_DP6.raw |         |         |         |         |         |
| K.YHAWIGLR.D       | N    | 61.14  | 1014.5399 | 8      | -0.1 | 508.2772 | 2 | 40.32 | 7        | F7:11939 | 17112021_RID_2349_DP7.raw |         |         |         |         | 3.38    |
| D.GSAVSYETVTK.Y    | N    | 57.05  | 1140.5663 | 11     | 0.1  | 571.2905 | 2 | 28.66 | 6        | F6:7260  | 17112021_RID_2349_DP6.raw |         |         |         |         |         |
| R.LFKTWEEAEK.F     | N    | 55.19  | 1279.6448 | 10     | 0.9  | 640.8303 | 2 | 35.62 | 7        | F7:9816  | 17112021_RID_2349_DP7.raw |         |         |         |         |         |
| K.SKYHAWIGLR.D     | N    | 51.39  | 1229.6669 | 10     | 0.3  | 615.8409 | 2 | 41.34 | 7        | F7:11753 | 17112021_RID_2349_DP7.raw |         |         |         |         |         |
| K.TWEEAEK.F.C      | N    | 47.94  | 1038.4658 | 8      | 0.3  | 520.2404 | 2 | 39.87 | 6        | F6:11136 | 17112021_RID_2349_DP6.raw |         |         |         |         |         |
| Y.HAWIGLR.D        | N    | 46.00  | 851.4766  | 7      | 0.5  | 426.7458 | 2 | 35.11 | 7        | F7:9748  | 17112021_RID_2349_DP7.raw |         |         |         |         |         |
| H.WTDGSAVSYETVTK.Y | N    | 45.93  | 1542.7202 | 14     | 0.5  | 772.3678 | 2 | 39.78 | 6        | F6:11115 | 17112021_RID_2349_DP6.raw |         |         |         |         |         |
| F.KTWEEAEK.F       | N    | 45.16  | 1019.4923 | 8      | 0.3  | 510.7536 | 2 | 17.57 | 6        | F6:3741  | 17112021_RID_2349_DP6.raw |         |         |         |         |         |

total 9 peptides

TRINITY\_DN59  
[back to list](#)

| [Protein Coverage](#) | [Supporting Peptides](#) |  
Protein Coverage:

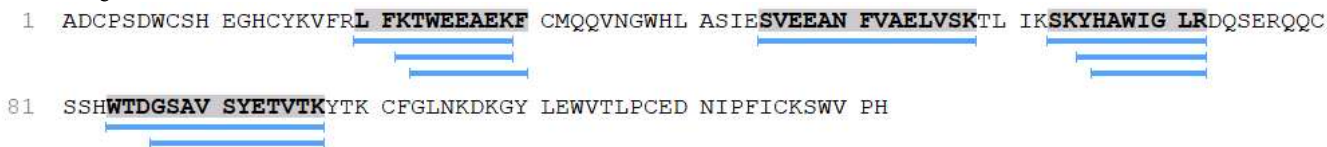

Supporting Peptides:

| Peptide            | Uniq | -10lgP | Mass      | Length | ppm  | m/z      | z | RT    | Fraction | Scan     | Source File               | Area F1 | Area F2 | Area F3 | Area F4 | Area F5 |
|--------------------|------|--------|-----------|--------|------|----------|---|-------|----------|----------|---------------------------|---------|---------|---------|---------|---------|
| E.SVEEANFVAELVSK.T | Y    | 64.69  | 1520.7722 | 14     | 0.7  | 761.3939 | 2 | 57.97 | 6        | F6:17304 | 17112021_RID_2349_DP6.raw |         |         |         |         |         |
| K.YHAWIGLR.D       | N    | 61.14  | 1014.5399 | 8      | -0.1 | 508.2772 | 2 | 40.32 | 7        | F7:11939 | 17112021_RID_2349_DP7.raw |         |         |         |         | 3.38    |
| D.GSAVSYETVTK.Y    | N    | 57.05  | 1140.5663 | 11     | 0.1  | 571.2905 | 2 | 28.66 | 6        | F6:7260  | 17112021_RID_2349_DP6.raw |         |         |         |         |         |
| R.LFKTWEEAEK.F     | N    | 55.19  | 1279.6448 | 10     | 0.9  | 640.8303 | 2 | 35.62 | 7        | F7:9816  | 17112021_RID_2349_DP7.raw |         |         |         |         |         |
| K.SKYHAWIGLR.D     | N    | 51.39  | 1229.6669 | 10     | 0.3  | 615.8409 | 2 | 41.34 | 7        | F7:11753 | 17112021_RID_2349_DP7.raw |         |         |         |         |         |
| K.TWEEAEK.F.C      | N    | 47.94  | 1038.4658 | 8      | 0.3  | 520.2404 | 2 | 39.87 | 6        | F6:11136 | 17112021_RID_2349_DP6.raw |         |         |         |         |         |
| Y.HAWIGLR.D        | N    | 46.00  | 851.4766  | 7      | 0.5  | 426.7458 | 2 | 35.11 | 7        | F7:9748  | 17112021_RID_2349_DP7.raw |         |         |         |         |         |
| H.WTDGSAVSYETVTK.Y | N    | 45.93  | 1542.7202 | 14     | 0.5  | 772.3678 | 2 | 39.78 | 6        | F6:11115 | 17112021_RID_2349_DP6.raw |         |         |         |         |         |
| F.KTWEEAEK.F       | N    | 45.16  | 1019.4923 | 8      | 0.3  | 510.7536 | 2 | 17.57 | 6        | F6:3741  | 17112021_RID_2349_DP6.raw |         |         |         |         |         |

total 9 peptides

TRINITY\_DN283  
[back to list](#)

| [Protein Coverage](#) | [Supporting Peptides](#) |  
Protein Coverage:

8/2/22, 12:12 PM

proteins

1

MLKKS

KMFL

LSIL

SFLCAT

SCSF

ARDES

NLFP

WDKIR

LPKY

VVPV

HYDL

LIHP

NLT

TLS

FTGL

SKIE

IL

ITEQ

TSSI

IL

81

HSKY

LQIT

KAT

TIHN

TKDS

ADTA

KGM

MVLE

HPPE

EQIA

LVST

EP

LQDG

QSY

IIS

IEYS

ANL

SESF

HGFY

KST

TYRT

LEGE

TR

161

VLA

STQ

FEAT

AAR

MA

FP

CFD

EP

AL

KAT

F

S

KIR

RSP

KHL

ALSN

MP

LV

KSV

NIN

E

W

L

I

E

D

Q

F

D

I

S

V

K

M

S

T

Y

L

V

A

F

I

S

D

F

K

241

SV

T

K

R

T

L

R

G

I

K

V

S

V

T

V

P

H

K

I

K

Q

A

E

Y

A

L

D

A

AV

K

L

L

D

F

F

E

G

Y

F

G

I

A

Y

P

L

P

K

Q

D

L

A

A

I

P

D

F

Q

S

G

A

M

E

N

W

G

L

T

Y

R

E

S

A

L

L

Y

D

321

SE

K

S

S

V

S

K

K

L

V

I

T

M

T

V

A

H

E

L

A

H

Q

W

F

G

N

L

V

T

M

E

W

W

N

D

L

W

L

N

E

G

F

A

K

F

M

E

F

V

S

R

K

T

H

P

E

L

K

V

E

D

H

F

L

N

K

Y

F

N

A

M

E

V

D

A

L

N

S

401

SH

P

I

S

T

P

V

E

D

P

A

Q

I

E

M

F

D

E

V

S

Y

D

K

G

A

C

I

L

N

M

L

Q

D

Y

L

S

P

E

V

F

Q

A

G

L

A

K

Y

L

R

R

F

S

Y

Q

N

T

K

N

K

D

L

W

D

S

L

S

D

V

C

P

Y

A

D

G

S

H

I

Q

481

NG

V

C

I

R

N

K

K

K

V

L

N

S

H

W

T

K

A

V

L

Q

D

V

Q

A

V

M

N

T

W

T

L

Q

K

G

F

P

L

V

T

V

T

I

K

G

N

I

H

L

Q

Q

E

H

Y

S

K

K

A

T

L

S

S

A

G

S

L

W

H

I

P

L

T

Y

I

T

N

K

C

561

ND

V

R

R

F

L

L

T

T

K

T

N

N

I

V

L

P

E

E

V

E

W

I

K

F

N

V

G

M

N

G

Y

I

V

H

Y

G

D

H

G

W

D

S

L

I

R

L

L

K

D

N

H

E

T

I

S

S

N

D

R

A

S

L

I

N

N

A

F

Q

L

V

S

A

G

K

L

S

I

641

E

K

A

L

D

L

T

L

Y

L

K

H

E

S

E

I

A

P

V

Y

Q

G

L

N

E

L

I

P

L

Y

K

L

L

E

K

T

N

I

S

D

T

E

Q

Q

L

K

A

Y

I

V

N

L

F

K

N

M

I

D

K

Q

S

W

D

D

E

G

T

V

S

E

Q

M

L

R

N

S

L

L

T

F

721

A

C

V

R

K

Y

K

P

C

V

D

K

A

Q

E

Y

F

M

K

W

K

N

S

D

G

T

L

K

L

P

N

N

I

K

M

A

V

Y

A

V

G

I

Q

T

D

E

N

W

D

F

L

F

S

K

Y

Q

L

P

E

F

D

T

E

K

N

Q

I

E

V

V

L

C

L

S

Q

N

K

E

K

L

801

Q

W

L

M

D

Q

A

L

Q

G

D

I

I

K

T

Q

E

L

P

S

I

L

V

S

V

G

R

N

P

Y

G

Y

Q

L

A

W

K

F

L

K

Q

N

W

Q

K

L

V

K

K

F

D

F

G

S

H

S

L

A

Q

M

I

T

G

I

T

N

Q

Y

S

T

K

E

Q

L

A

E

V

K

N

Y

881

F

S

S

M

D

K

K

T

S

E

L

R

A

V

Q

Q

A

I

E

T

E

E

N

I

Q

W

M

D

K

N

L

E

K

L

K

A

W

L

Q

I

N

S

K

V

Supporting Peptides:

| Peptide               | Uniq | -10lgP | Mass      | Length | ppm  | m/z      | z | RT    | Fraction | Scan     | Source File               | Area F1  | Area F2  | Area F3 |
|-----------------------|------|--------|-----------|--------|------|----------|---|-------|----------|----------|---------------------------|----------|----------|---------|
| R.ASLINNAFQLVSAGK.L   | Y    | 67.88  | 1531.8358 | 15     | -0.2 | 766.9250 | 2 | 59.92 | 2        | F2:17595 | 12112021_RID_2349_DP2.raw | 2.8511E5 |          |         |
| K.TQELPSILVSVGR.N     | Y    | 67.46  | 1397.7878 | 13     | 0.4  | 699.9015 | 2 | 55.31 | 2        | F2:16054 | 12112021_RID_2349_DP2.raw | 4.1868E4 | 3.6255E5 |         |
| K.AYIVNLFK.N          | Y    | 58.66  | 966.5538  | 8      | 0.5  | 484.2844 | 2 | 53.23 | 2        | F2:15426 | 12112021_RID_2349_DP2.raw | 2.4274E5 |          |         |
| K.LQWLMDQALQGDIHK.T   | Y    | 56.30  | 1770.9338 | 15     | -0.1 | 886.4741 | 2 | 65.16 | 2        | F2:19201 | 12112021_RID_2349_DP2.raw | 7.7937E4 |          |         |
| K.NYFSSM(+15.99)DKK.T | Y    | 40.82  | 1134.5016 | 9      | -0.6 | 568.2578 | 2 | 29.43 | 2        | F2:7291  | 12112021_RID_2349_DP2.raw | 3.9503E4 |          |         |
| R.NPYGYQLAWK.F        | Y    | 40.39  | 1238.6084 | 10     | -0.4 | 620.3112 | 2 | 47.34 | 2        | F2:13416 | 12112021_RID_2349_DP2.raw | 1.0503E6 |          |         |
| K.AQEYFMK.W           | Y    | 39.57  | 915.4160  | 7      | 0.6  | 458.7155 | 2 | 32.48 | 2        | F2:8440  | 12112021_RID_2349_DP2.raw | 3.5139E4 |          |         |
| R.LLKDNHETISSNDR.A    | Y    | 39.52  | 1640.8118 | 14     | 0.6  | 547.9449 | 3 | 22.93 | 2        | F2:5192  | 12112021_RID_2349_DP2.raw | 1.5804E5 |          |         |
| total 8 peptide:      |      |        |           |        |      |          |   |       |          |          |                           |          |          |         |

TRINITY\_DN283

[back to list](#)

[Protein Coverage](#) | [Supporting Peptides](#)

Protein Coverage:

1

MLKKS

KMFL

LSIL

SFLCAT

SCSF

ARDES

NLFP

WDKIR

LPKY

VVPV

HYDL

LIHP

NLT

TLS

FTGL

SKIE

IL

ITEQ

TSSI

IL

81

HSKY

LQIT

KAT

TIHN

TKDS

ADTA

KGM

MVLE

HPPE

EQIA

LVST

EP

LQDG

QSY

IIS

IEYS

ANL

SESF

HGFY

KST

TYRT

LEGE

TR

161

VLA

STQ

FEAT

AAR

MA

FP

CFD

EP

AL

KAT

F

S

KIR

RSP

KHL

ALSN

MP

LV

KSV

NIN

E

W

L

I

E

D

Q

F

D

I

S

V

K

M

S

T

Y

L

V

A

F

I

S

D

F

K

241

SV

T

K

R

T

L

R

G

I

K

V

S

V

T

V

P

H

K

I

K

Q

A

E

Y

A

L

D

A

AV

K

L

L

D

F

F

E

G

Y

F

G

I

A

Y

P

L

P

K

Q

D

L

A

A

I

P

D

F

Q

S

G

A

M

E

N

W

G

L

T

Y

R

E

S

A

L

L

Y

D

321

SE

K

S

S

V

S

K

K

L

V

I

T

M

T

V

A

H

E

L

A

H

Q

W

F

G

N

L

V

T

M

E

W

W

N

D

L

W

L

N

E

G

F

A

K

F

M

E

F

V

S

R

K

T

H

P

E

L

K

V

E

D

H

F

L

N

K

Y

F

N

A

M

E

V

D

A

L

N

S

401

SH

P

I

S

T

P

V

E

D

P

A

Q

I

E

M

F

D

E

V

S

Y

D

K

G

A

C

I

L

N

M

L

Q

D

Y

L

S

P

E

V

V

F

Q

A

G

L

A

K

Y

L

R

R

F

S

Y

Q

N

T

K

N

K

D

L

W

D

S

L

S

D

V

C

P

Y

A

D

G

S

H

I

Q

481

NG

V

C

I

R

N

K

K

K

V

L

N

S

H

W

T

K

A

V

L

Q

D

V

Q

A

V

M

N

T

W

T

L

Q

K

G

F

P

L

V

T

V

T

I

K

G

N

I

H

L

Q

Q

E

H

Y

S

K

K

A

T

L

S

S

A

G

S

L

W

H

I

P

L

T

Y

I

T

N

K

C

561

ND

V

R

R

F

L

L

T

T

K

T

N

N

I

V

L

P

E

E

V

E

W

I

K

F

N

V

G

M

N

G

Y

I

V

H

Y

G

D

H

G

W

D

S

L

I

R

L

L

K

D

N

H

E

T

I

S

S

N

D

R

A

S

L

I

N

N

A

F

Q

L

V

S

A

G

K

L

S

I

641

E

K

A

L

D

L

T

L

Y

L

K

H

E

S

E

I

A

P

V

Y

Q

G

L

N

E

L

I

P

L

Y

K

L

L

E

K

T

N

I

S

D

T

E

Q

Q

L

K

A

Y

I

V

N

L

F

K

N

M

I

D

K

Q

S

W

D

D

E

G

T

V

S

E

Q

M

L

R

N

S

L

L

T

F

721

A

C

V

R

K

Y

K

P

C

V

D

K

A

Q

E

Y

F

M

K

W

K

N

S

D

G

T

L

K

L

P

N

N

I

K

M

A

V

Y

A

V

G

I

Q

T

D

E

N

W

D

F

L

F

S

K

Y

Q

L

P

E

F

D

T

E

K

N

Q

I

E

V

V

L

C

L

S

Q

N

K

E

K

L

801

Q

W

L

M

D

Q

A

L

Q

G

D

I

I

K

T

Q

E

L

P

S

I

L

V

S

V

G

R

N

P

Y

G

Y

Q

L

A

W

K

F

L

K

Q

N

W

Q

K

L

V

K

K

F

D

F

G

S

H

S

L

A

Q

M

I

T

G

I

T

N

Q

Y

S

T

K

E

Q

L

A

E

V

K

N

Y

881

F

S

S

M

D

K

K

T

S

E

L

R

A

V

Q

Q

A

I

E

T

E

E

N

I

Q

W

M

D

K

N

L

E

K

L

K

A

W

L

Q

I

N

S

K

V

Supporting Peptides:

| Peptide               | Uniq | -10lgP | Mass      | Length | ppm  | m/z      | z | RT    | Fraction | Scan     | Source File               | Area F1  | Area F2  | Area F3 |
|-----------------------|------|--------|-----------|--------|------|----------|---|-------|----------|----------|---------------------------|----------|----------|---------|
| R.ASLINNAFQLVSAGK.L   | Y    | 67.88  | 1531.8358 | 15     | -0.2 | 766.9250 | 2 | 59.92 | 2        | F2:17595 | 12112021_RID_2349_DP2.raw | 2.8511E5 |          |         |
| K.TQELPSILVSVGR.N     | Y    | 67.46  | 1397.7878 | 13     | 0.4  | 699.9015 | 2 | 55.31 | 2        | F2:16054 | 12112021_RID_2349_DP2.raw | 4.1868E4 | 3.6255E5 |         |
| K.AYIVNLFK.N          | Y    | 58.66  | 966.5538  | 8      | 0.5  | 484.2844 | 2 | 53.23 | 2        | F2:15426 | 12112021_RID_2349_DP2.raw | 2.4274E5 |          |         |
| K.LQWLMDQALQGDIHK.T   | Y    | 56.30  | 1770.9338 | 15     | -0.1 | 886.4741 | 2 | 65.16 | 2        | F2:19201 | 12112021_RID_2349_DP2.raw | 7.7937E4 |          |         |
| K.NYFSSM(+15.99)DKK.T | Y    | 40.82  | 1134.5016 | 9      | -0.6 | 568.2578 | 2 | 29.43 | 2        | F2:7291  | 12112021_RID_2349_DP2.raw | 3.9503E4 |          |         |
| total 8 peptide:      |      |        |           |        |      |          |   |       |          |          |                           |          |          |         |

| Peptide            | Uniq | -10lgP | Mass      | Length | ppm  | m/z      | z | RT    | Fraction | Scan     | Source File               | Area F1 | Area F2  | Area F3 |
|--------------------|------|--------|-----------|--------|------|----------|---|-------|----------|----------|---------------------------|---------|----------|---------|
| R.NPYGYQLAWK.F     | Y    | 40.39  | 1238.6084 | 10     | -0.4 | 620.3112 | 2 | 47.34 | 2        | F2:13416 | 12112021_RID_2349_DP2.raw |         | 1.0503E6 |         |
| K.AQEYFMK.W        | Y    | 39.57  | 915.4160  | 7      | 0.6  | 458.7155 | 2 | 32.48 | 2        | F2:8440  | 12112021_RID_2349_DP2.raw |         | 3.5139E4 |         |
| R.LLKDNHETISSNDR.A | Y    | 39.52  | 1640.8118 | 14     | 0.6  | 547.9449 | 3 | 22.93 | 2        | F2:5192  | 12112021_RID_2349_DP2.raw |         | 1.5804E5 |         |
| total 8 peptides   |      |        |           |        |      |          |   |       |          |          |                           |         |          |         |

TRINITY\_DN283  
[back to list](#)

[Protein Coverage](#) | [Supporting Peptides](#) |  
Protein Coverage:

|     |        |       |           |          |           |       |         |       |       |       |            |            |         |       |       |       |       |
|-----|--------|-------|-----------|----------|-----------|-------|---------|-------|-------|-------|------------|------------|---------|-------|-------|-------|-------|
| 1   | MLKKS  | KMFLL | LSILS     | FLCAT    | SCSFARDES | N     | LFPWD   | KIRLP | KYVVP | VHYDL | LIHPN      | LTTLS      | FTGLS   | KIEIL | ITEQT | SSIIL |       |
| 81  | HSKYL  | QITKA | TIHNT     | KDSAD    | TAKGM     | VLEH  | PFPEQ   | IALVS | TEPLQ | DGQSY | IISIE      | YSANL      | SESFH   | GFYKS | TYRTL | EGETR |       |
| 161 | VLAST  | QFEAT | AARMA     | FPCFD    | EPALK     | ATFSI | KIRRS   | PKHLA | LSNMP | LVKSV | NINEL      | LIEDQ      | FDISV   | KMSTY | LVAFI | ISDFK |       |
| 241 | SVTKR  | TLRGI | KVS       | VYTPHK   | IKQAE     | YALDA | AVKLL   | DFFEQ | YFGIA | YPLPK | QDLAA      | IPDFQ      | SGAMEN  | NWGLT | TYRES | ALLYD |       |
| 321 | SEKSS  | VS    | SKKL      | VITMT    | VAHEL     | AHQW  | FGNLVT  | MEW   | W     | N     | DLWLN      | EGFAK      | FMEFV   | SVRKT | HPELK | VEDHF | LNKYF |
| 401 | SHPIST | PVED  | PAQIL     | EMFDE    | VSYDK     | GACIL | NMLQD   | YLSPE | VFQAG | LAKYL | LRFSY      | QNTKN      | KDLWD   | SLSDV | CPYAD | GSHIQ |       |
| 481 | NGVCIR | NKKK  | VLNSH     | WTKAV    | LQDVQ     | AVMNT | WTLQK   | GFPLV | TVTIK | GKNIH | LQQEH      | YSKKA      | TLSSA   | GSLWH | IPLTY | ITNKC |       |
| 561 | NDVRR  | FLLTT | KTNNI     | VLPEE    | VEWIK     | FNVGM | NGYYI   | VHYGD | HGWDS | LIRLL | KDNHETISSN | DRASLINNAF | QLVSAGK | LSI   |       |       |       |
| 641 | EKALD  | LTLYL | KHESE     | IAPVY    | QGLNE     | LIPLY | KLEKT   | NI    | SD    | TEQQL | KAYIV      | NLFKN      | MIDKQ   | SWDDE | GTVSE | QMLRN | SLTTF |
| 721 | ACVRK  | YKPCV | DKAQEYFMK | W        | KNSDG     | TLKLP | NNIKM   | AVYAV | GIQTD | ENWDF | LFSKY      | QLPEF      | DTEKN   | QIEVV | LCLSQ | NKEKL |       |
| 801 | QWLMD  | QALQG | DI        | IKTQELPS | ILVSV     | GRNPY | GYQLAWK | FLK   | QNWQK | LVKKF | DFGSH      | S          | LAQM    | ITGIT | NQYST | KEQLA | EVKNY |
| 881 | FSSMD  | KK    | TSE       | LRAVQ    | QAIET     | IEENI | QWMDK   | NLEKL | KAWLQ | INSKV |            |            |         |       |       |       |       |

Supporting Peptides:

| Peptide               | Uniq | -10lgP | Mass      | Length | ppm  | m/z      | z | RT    | Fraction | Scan     | Source File               | Area F1  | Area F2  | Area F3 |
|-----------------------|------|--------|-----------|--------|------|----------|---|-------|----------|----------|---------------------------|----------|----------|---------|
| R.ASLINNAFQLVSAGK.L   | Y    | 67.88  | 1531.8358 | 15     | -0.2 | 766.9250 | 2 | 59.92 | 2        | F2:17595 | 12112021_RID_2349_DP2.raw |          | 2.8511E5 |         |
| K.TQELPSILVSVGR.N     | Y    | 67.46  | 1397.7878 | 13     | 0.4  | 699.9015 | 2 | 55.31 | 2        | F2:16054 | 12112021_RID_2349_DP2.raw | 4.1868E4 | 3.6255E5 |         |
| K.AYIVNLFK.N          | Y    | 58.66  | 966.5538  | 8      | 0.5  | 484.2844 | 2 | 53.23 | 2        | F2:15426 | 12112021_RID_2349_DP2.raw |          | 2.4274E5 |         |
| K.LQWLMDQALQGDIK.T    | Y    | 56.30  | 1770.9338 | 15     | -0.1 | 886.4741 | 2 | 65.16 | 2        | F2:19201 | 12112021_RID_2349_DP2.raw |          | 7.7937E4 |         |
| K.NYFSSM(+15.99)DKK.T | Y    | 40.82  | 1134.5016 | 9      | -0.6 | 568.2578 | 2 | 29.43 | 2        | F2:7291  | 12112021_RID_2349_DP2.raw |          | 3.9503E4 |         |
| R.NPYGYQLAWK.F        | Y    | 40.39  | 1238.6084 | 10     | -0.4 | 620.3112 | 2 | 47.34 | 2        | F2:13416 | 12112021_RID_2349_DP2.raw |          | 1.0503E6 |         |
| K.AQEYFMK.W           | Y    | 39.57  | 915.4160  | 7      | 0.6  | 458.7155 | 2 | 32.48 | 2        | F2:8440  | 12112021_RID_2349_DP2.raw |          | 3.5139E4 |         |
| R.LLKDNHETISSNDR.A    | Y    | 39.52  | 1640.8118 | 14     | 0.6  | 547.9449 | 3 | 22.93 | 2        | F2:5192  | 12112021_RID_2349_DP2.raw |          | 1.5804E5 |         |
| total 8 peptides      |      |        |           |        |      |          |   |       |          |          |                           |          |          |         |

TRINITY\_DN283  
[back to list](#)

[Protein Coverage](#) | [Supporting Peptides](#) |  
Protein Coverage:

|     |        |       |           |          |           |       |         |       |       |       |            |            |         |       |       |       |       |
|-----|--------|-------|-----------|----------|-----------|-------|---------|-------|-------|-------|------------|------------|---------|-------|-------|-------|-------|
| 1   | MLKKS  | KMFLL | LSILS     | FLCAT    | SCSFARDES | N     | LFPWD   | KIRLP | KYVVP | VHYDL | LIHPN      | LTTLS      | FTGLS   | KIEIL | ITEQT | SSIIL |       |
| 81  | HSKYL  | QITKA | TIHNT     | KDSAD    | TAKGM     | VLEH  | PFPEQ   | IALVS | TEPLQ | DGQSY | IISIE      | YSANL      | SESFH   | GFYKS | TYRTL | EGETR |       |
| 161 | VLAST  | QFEAT | AARMA     | FPCFD    | EPALK     | ATFSI | KIRRS   | PKHLA | LSNMP | LVKSV | NINEL      | LIEDQ      | FDISV   | KMSTY | LVAFI | ISDFK |       |
| 241 | SVTKR  | TLRGI | KVS       | VYTPHK   | IKQAE     | YALDA | AVKLL   | DFFEQ | YFGIA | YPLPK | QDLAA      | IPDFQ      | SGAMEN  | NWGLT | TYRES | ALLYD |       |
| 321 | SEKSS  | VS    | SKKL      | VITMT    | VAHEL     | AHQW  | FGNLVT  | MEW   | W     | N     | DLWLN      | EGFAK      | FMEFV   | SVRKT | HPELK | VEDHF | LNKYF |
| 401 | SHPIST | PVED  | PAQIL     | EMFDE    | VSYDK     | GACIL | NMLQD   | YLSPE | VFQAG | LAKYL | LRFSY      | QNTKN      | KDLWD   | SLSDV | CPYAD | GSHIQ |       |
| 481 | NGVCIR | NKKK  | VLNSH     | WTKAV    | LQDVQ     | AVMNT | WTLQK   | GFPLV | TVTIK | GKNIH | LQQEH      | YSKKA      | TLSSA   | GSLWH | IPLTY | ITNKC |       |
| 561 | NDVRR  | FLLTT | KTNNI     | VLPEE    | VEWIK     | FNVGM | NGYYI   | VHYGD | HGWDS | LIRLL | KDNHETISSN | DRASLINNAF | QLVSAGK | LSI   |       |       |       |
| 641 | EKALD  | LTLYL | KHESE     | IAPVY    | QGLNE     | LIPLY | KLEKT   | NI    | SD    | TEQQL | KAYIV      | NLFKN      | MIDKQ   | SWDDE | GTVSE | QMLRN | SLTTF |
| 721 | ACVRK  | YKPCV | DKAQEYFMK | W        | KNSDG     | TLKLP | NNIKM   | AVYAV | GIQTD | ENWDF | LFSKY      | QLPEF      | DTEKN   | QIEVV | LCLSQ | NKEKL |       |
| 801 | QWLMD  | QALQG | DI        | IKTQELPS | ILVSV     | GRNPY | GYQLAWK | FLK   | QNWQK | LVKKF | DFGSH      | S          | LAQM    | ITGIT | NQYST | KEQLA | EVKNY |
| 881 | FSSMD  | KK    | TSE       | LRAVQ    | QAIET     | IEENI | QWMDK   | NLEKL | KAWLQ | INSKV |            |            |         |       |       |       |       |

Supporting Peptides:

| Peptide               | Uniq | -10lgP | Mass      | Length | ppm  | m/z      | z | RT    | Fraction | Scan     | Source File               | Area F1  | Area F2  | Area F3 |
|-----------------------|------|--------|-----------|--------|------|----------|---|-------|----------|----------|---------------------------|----------|----------|---------|
| R.ASLINNAFQLVSAGK.L   | Y    | 67.88  | 1531.8358 | 15     | -0.2 | 766.9250 | 2 | 59.92 | 2        | F2:17595 | 12112021_RID_2349_DP2.raw |          | 2.8511E5 |         |
| K.TQELPSILVSVGR.N     | Y    | 67.46  | 1397.7878 | 13     | 0.4  | 699.9015 | 2 | 55.31 | 2        | F2:16054 | 12112021_RID_2349_DP2.raw | 4.1868E4 | 3.6255E5 |         |
| K.AYIVNLFK.N          | Y    | 58.66  | 966.5538  | 8      | 0.5  | 484.2844 | 2 | 53.23 | 2        | F2:15426 | 12112021_RID_2349_DP2.raw |          | 2.4274E5 |         |
| K.LQWLMDQALQGDIHK.T   | Y    | 56.30  | 1770.9338 | 15     | -0.1 | 886.4741 | 2 | 65.16 | 2        | F2:19201 | 12112021_RID_2349_DP2.raw |          | 7.7937E4 |         |
| K.NYFSSM(+15.99)DKK.T | Y    | 40.82  | 1134.5016 | 9      | -0.6 | 568.2578 | 2 | 29.43 | 2        | F2:7291  | 12112021_RID_2349_DP2.raw |          | 3.9503E4 |         |
| R.NPYGYQLAWK.F        | Y    | 40.39  | 1238.6084 | 10     | -0.4 | 620.3112 | 2 | 47.34 | 2        | F2:13416 | 12112021_RID_2349_DP2.raw |          | 1.0503E6 |         |
| K.AQEYFMK.W           | Y    | 39.57  | 915.4160  | 7      | 0.6  | 458.7155 | 2 | 32.48 | 2        | F2:8440  | 12112021_RID_2349_DP2.raw |          | 3.5139E4 |         |
| R.LLKDNHETISSNDR.A    | Y    | 39.52  | 1640.8118 | 14     | 0.6  | 547.9449 | 3 | 22.93 | 2        | F2:5192  | 12112021_RID_2349_DP2.raw |          | 1.5804E5 |         |

total 8 peptide:

TRINITY\_DN283  
[back to list](#)

| [Protein Coverage](#) | [Supporting Peptides](#) |  
Protein Coverage:

|     |        |       |       |       |        |       |         |       |       |       |            |            |            |       |       |        |  |
|-----|--------|-------|-------|-------|--------|-------|---------|-------|-------|-------|------------|------------|------------|-------|-------|--------|--|
| 1   | MLKKS  | KMFLL | LSILS | FLCAT | SCSFAR | DESN  | LFPWD   | KIRLP | KYVVP | VHYDL | LIHPN      | LTTLS      | FTGLS      | KIEIL | ITEQT | SSIIL  |  |
| 81  | HSKYL  | QITKA | TIHNT | KDSAD | TAKGM  | VLEH  | PFPEQ   | IALVS | TEPLQ | DGQSY | IISIE      | YSANL      | SESFH      | GFKS  | TYRTE | LEGETR |  |
| 161 | VLAST  | QFEAT | AARMA | FPCFD | EPALK  | ATFSI | KIRRS   | PKHLA | LSNMP | LVKSV | NINEW      | LIEDQ      | FDISV      | KMSTY | LVAFI | ISDFK  |  |
| 241 | SVTKR  | TLRGI | KSVYT | VPHK  | IKQAE  | YALDA | AVKLL   | DFFEG | YFGIA | YPLPK | QDLAA      | IPDFQ      | SGAMEN     | NWGLT | TYRES | ALLYD  |  |
| 321 | SEKSS  | VSKKL | VITMT | VAHEL | AHQWF  | GNLVT | MEWWN   | DWLWN | EGFAK | FMEFV | SVRKT      | HPELK      | VEDHF      | LNKYF | NAMEV | DALNS  |  |
| 401 | SHPIST | PVED  | PAQIL | EMFDE | VSYDK  | GACIL | NMLQD   | YLSPE | VFQAG | LAKYL | LRFSY      | QNTKN      | KDLWD      | SLSDV | CPYAD | GSHIQ  |  |
| 481 | NGVCIR | NKKK  | VLNSH | WTKAV | LQDVQ  | AVMNT | WTLQK   | GFPLV | TVTIK | GKNIH | LQQEH      | YSKKA      | TLSSA      | GSLWH | IPLTY | ITNKC  |  |
| 561 | NDVRR  | FLLTT | KTNNI | VLPEE | VEWIK  | FNVMG | NGYYI   | VHYGD | HGWSL | LIRLL | KDNHETISSN | DRASLINNAF | QLVSAGKLSI |       |       |        |  |
| 641 | EKALD  | LTLYL | KHESE | IAPVY | QGLNE  | LIPLY | KLLEK   | TNISD | TEQQL | KAYIV | NLFKN      | NMIDKQ     | SWDDE      | GTVSE | QMLRN | SLLTF  |  |
| 721 | ACVRKY | KPCV  | DKAEY | FMKW  | KNSDG  | TLKLP | NNIKM   | AVYAV | GIQTD | ENWDF | LFSKY      | QLPEF      | DTEKN      | QIEVV | LCLSQ | NKEKL  |  |
| 801 | QWLMD  | QALQG | DIIKT | QELPS | ILVSV  | GRNPY | GYQLAWK | FLK   | QNWQK | LVKKF | DFGSH      | SLAQM      | ITGIT      | NQYST | KEQLA | EVKNY  |  |
| 881 | FSSMD  | KKTSE | LRAVQ | QAIET | IEENI  | QWMDK | NLEKL   | KAWLQ | INSKV |       |            |            |            |       |       |        |  |

Supporting Peptides:

| Peptide               | Uniq | -10lgP | Mass      | Length | ppm  | m/z      | z | RT    | Fraction | Scan     | Source File               | Area F1  | Area F2  | Area F3 |
|-----------------------|------|--------|-----------|--------|------|----------|---|-------|----------|----------|---------------------------|----------|----------|---------|
| R.ASLINNAFQLVSAGK.L   | Y    | 67.88  | 1531.8358 | 15     | -0.2 | 766.9250 | 2 | 59.92 | 2        | F2:17595 | 12112021_RID_2349_DP2.raw |          | 2.8511E5 |         |
| K.TQELPSILVSVGR.N     | Y    | 67.46  | 1397.7878 | 13     | 0.4  | 699.9015 | 2 | 55.31 | 2        | F2:16054 | 12112021_RID_2349_DP2.raw | 4.1868E4 | 3.6255E5 |         |
| K.AYIVNLFK.N          | Y    | 58.66  | 966.5538  | 8      | 0.5  | 484.2844 | 2 | 53.23 | 2        | F2:15426 | 12112021_RID_2349_DP2.raw |          | 2.4274E5 |         |
| K.LQWLMDQALQGDIHK.T   | Y    | 56.30  | 1770.9338 | 15     | -0.1 | 886.4741 | 2 | 65.16 | 2        | F2:19201 | 12112021_RID_2349_DP2.raw |          | 7.7937E4 |         |
| K.NYFSSM(+15.99)DKK.T | Y    | 40.82  | 1134.5016 | 9      | -0.6 | 568.2578 | 2 | 29.43 | 2        | F2:7291  | 12112021_RID_2349_DP2.raw |          | 3.9503E4 |         |
| R.NPYGYQLAWK.F        | Y    | 40.39  | 1238.6084 | 10     | -0.4 | 620.3112 | 2 | 47.34 | 2        | F2:13416 | 12112021_RID_2349_DP2.raw |          | 1.0503E6 |         |
| K.AQEYFMK.W           | Y    | 39.57  | 915.4160  | 7      | 0.6  | 458.7155 | 2 | 32.48 | 2        | F2:8440  | 12112021_RID_2349_DP2.raw |          | 3.5139E4 |         |
| R.LLKDNHETISSNDR.A    | Y    | 39.52  | 1640.8118 | 14     | 0.6  | 547.9449 | 3 | 22.93 | 2        | F2:5192  | 12112021_RID_2349_DP2.raw |          | 1.5804E5 |         |

total 8 peptide:

TRINITY\_DN283  
[back to list](#)

| [Protein Coverage](#) | [Supporting Peptides](#) |  
Protein Coverage:

1 MLKKSKMFLLSILSFLCATSCSFARDESNLFPWDKIRLPKYVVPVHYDL LIHPNLTTLS FTGLSKIEIL ITEQTSSIIL

81 HSKYLQITKA TIHNTKDSAD TAKGMMVLEH PPFEQIALVS TEPLQDGQSY IISIEYSANL SESFHGFYKS TYRTLEGETR

161 VLASTQFEAT AARMAFPCFD EPALKATFSI KIRRS PKHLA LSNMPLVKSV NINEWLIEDQ FDISVKMSTY LVAFIISDFK

241 SVTKRTL RGI KVS VYTPHK IKQAEYALDA AVKLLDFFEG YFGIAYPLPK QDLAAIPDFQ SGAMENWGLT TYRESALLYD

321 SEKSSVSKKL VITMTVAHEL AHQWFGNLVT MEWWNDLWLN EGF AKFMEFV SVR KTHPELK VEDHFLNKYF NAMEVDALNS

401 SHPISTPVED PAQILEMFDE VSYDKGACIL NMLQDYLSP E VFQAGLAKYL LRFSYQNTKN KDLWDSLSDV CPYADGSHIQ

481 NGVCIRNKKK VLNSHWT KAV LQDVQAVMNT WTLQKGFLPV TVTIKGKNIH LQQEHYSKKA TLSSAGSLWH IPLTYITNKC

561 NDVRRFLLTT KTN NIVLPEE VEWIKFNVGM NGYYIVHYGD HGWD SLIRLL KDNHETISSN DRASLINNAF QLV SAGKLSI

641 EKALDLTLYL KHESEIAPVY QGLNELIPLY KLEKTNISD TEQQLKAYIV NLFKNMIDKQ SWDDEGTVSE QMLRNSLLTF

721 ACVRKYKPCV DKAQEYFMKW KNSDGT LKLP NNIKMAVYAV GIQTDENWDF LFSKYQLPEF DTEKNQIEVV LCLSQNKEKL

801 QWLMDQALQG DIIKTQELPS ILVSVGRNPFY GYQLAWKFLK QNWQKL VKKF DFGSHSLAQ M ITGITNQYST KEQLAEVKNY

881 FSSMDKKTSE LRAVQQAIET IEENIQWMDK NLEKLKAWLQ INSKV

Supporting Peptides:

| Peptide               | Uniq | -10lgP | Mass      | Length | ppm  | m/z      | z | RT    | Fraction | Scan     | Source File               | Area F1  | Area F2  | Area F3 |
|-----------------------|------|--------|-----------|--------|------|----------|---|-------|----------|----------|---------------------------|----------|----------|---------|
| R.ASLINNAFQLVSAGK.L   | Y    | 67.88  | 1531.8358 | 15     | -0.2 | 766.9250 | 2 | 59.92 | 2        | F2:17595 | 12112021_RID_2349_DP2.raw |          | 2.8511E5 |         |
| K.TQELPSILVSVGR.N     | Y    | 67.46  | 1397.7878 | 13     | 0.4  | 699.9015 | 2 | 55.31 | 2        | F2:16054 | 12112021_RID_2349_DP2.raw | 4.1868E4 | 3.6255E5 |         |
| K.AYIVNLFK.N          | Y    | 58.66  | 966.5538  | 8      | 0.5  | 484.2844 | 2 | 53.23 | 2        | F2:15426 | 12112021_RID_2349_DP2.raw |          | 2.4274E5 |         |
| K.LQWLMDQALQGDIHK.T   | Y    | 56.30  | 1770.9338 | 15     | -0.1 | 886.4741 | 2 | 65.16 | 2        | F2:19201 | 12112021_RID_2349_DP2.raw |          | 7.7937E4 |         |
| K.NYFSSM(+15.99)DKK.T | Y    | 40.82  | 1134.5016 | 9      | -0.6 | 568.2578 | 2 | 29.43 | 2        | F2:7291  | 12112021_RID_2349_DP2.raw |          | 3.9503E4 |         |
| R.NPYGYQLAWK.F        | Y    | 40.39  | 1238.6084 | 10     | -0.4 | 620.3112 | 2 | 47.34 | 2        | F2:13416 | 12112021_RID_2349_DP2.raw |          | 1.0503E6 |         |
| K.AQEYFMK.W           | Y    | 39.57  | 915.4160  | 7      | 0.6  | 458.7155 | 2 | 32.48 | 2        | F2:8440  | 12112021_RID_2349_DP2.raw |          | 3.5139E4 |         |
| R.LLKDNHETISSNDR.A    | Y    | 39.52  | 1640.8118 | 14     | 0.6  | 547.9449 | 3 | 22.93 | 2        | F2:5192  | 12112021_RID_2349_DP2.raw |          | 1.5804E5 |         |
| total 8 peptides      |      |        |           |        |      |          |   |       |          |          |                           |          |          |         |

TRINITY\_DN714  
[back to list](#)

[Protein Coverage](#) | [Supporting Peptides](#) |  
Protein Coverage:

1 VVDVTLSFG EWRERDLLNR KKHDNAQLLT GINFN GDTVG FGFVGSICMP KESVGIVQDH SKTHLLVATT MAHELGHNLG

81 INHDEKQCNC GANSCIMAAM VSDPPPLYFS DCSR DQYQKF LTNFKPDCTL IRPSRTDIVS PPACGNELLE KGE ECD CGSL

161 WYCRNPCCDA ATCKLKPGAQ CGDGMCCYQC RFV TAGTVCR PARDECDIPE YCSGQSVECP MDHFQKNGKP CLMNYGYCYN

241 GRCPIMIHQC IALWGPGTTV SPDVCFQKNK SGQDY YYCRR ENNKNIPCAP QDVKCGRLYC KLHNVDTFSC NIRYSDVALD

321 YGMVDHGTKC GDGKVCNSNR QCVDVNTAY

Supporting Peptides:

| Peptide                      | Uniq | -10lgP | Mass      | Length | ppm  | m/z      | z | RT    | Fraction | Scan     | Source File               | Area F1  | Area F2 | Area F3 |
|------------------------------|------|--------|-----------|--------|------|----------|---|-------|----------|----------|---------------------------|----------|---------|---------|
| R.YSDVALDYGMVDHGTK.C         | Y    | 87.37  | 1769.7930 | 16     | 0.7  | 885.9044 | 2 | 41.97 | 4        | F4:11928 | 17112021_RID_2349_DP4.raw |          |         |         |
| R.YSDVALDYGM(+15.99)VDHGTK.C | Y    | 69.95  | 1785.7880 | 16     | 0.5  | 893.9017 | 2 | 37.05 | 5        | F5:10247 | 17112021_RID_2349_DP5.raw |          |         |         |
| K.ESVGIVQDH SK.T             | N    | 58.55  | 1197.5989 | 11     | 0.9  | 599.8073 | 2 | 22.46 | 5        | F5:5229  | 17112021_RID_2349_DP5.raw |          |         |         |
| N.SFGEWRER.D                 | N    | 55.07  | 1065.4991 | 8      | 0.1  | 533.7569 | 2 | 31.26 | 2        | F2:7954  | 12112021_RID_2349_DP2.raw | 6.0265E6 | 2.41    |         |
| K.HDNAQLLTGINFN.G            | N    | 48.53  | 1455.7106 | 13     | 1.2  | 728.8634 | 2 | 53.68 | 3        | F3:15808 | 17112021_RID_2349_DP3.raw |          |         |         |
| R.ERDLLNR.K                  | N    | 42.02  | 914.4933  | 7      | -0.1 | 458.2539 | 2 | 23.23 | 1        | F1:6203  | 12112021_RID_2349_DP1.raw | 1.8049E7 | 3.28    |         |

TRINITY\_DN249  
[back to list](#)

[Protein Coverage](#) | [Supporting Peptides](#) |  
Protein Coverage:

1 MLLLLFLLSA SWSNVPTNGE VVDSFEANCP QFFLRETPPV IRHPPRSVRI CQRYQNLRYF ATLYNEDNCI PVYSAYIYNP

81 GKAKRPK**KWM IEPQLINSSF QPEMETEGEF LNK**KGSKEAL QESQAILQDY KNLTDCNR**GH LNPNGHQPDY SAKSSTFTLT**

161 **NIVPQFIK**LN GGAWNNYEQS TMVQMTKGCQ ETFAVVGAVP GDTSVSGGRV NRPSHLWSAA CCVIDNNHLR SWAILAR**NDQ**

241 **NVVETFTLGQ LEYQLAR**LYN VNRVSLFHSD CPRQ

Supporting Peptides:

| Peptide                        | Uniq | -10lgP | Mass      | Length | ppm  | m/z       | z | RT    | Fraction | Scan     | Source File               | Area F1 | Area F |
|--------------------------------|------|--------|-----------|--------|------|-----------|---|-------|----------|----------|---------------------------|---------|--------|
| R.NDQNVVETFTLGQLEYQLAR.L       | Y    | 78.63  | 2337.1602 | 20     | 0.1  | 1169.5875 | 2 | 68.98 | 3        | F3:20748 | 17112021_RID_2349_DP3.raw |         |        |
| R.GHLNPNNGHQPDYSAK.S           | Y    | 73.72  | 1633.7596 | 15     | 1.0  | 545.5944  | 3 | 20.98 | 3        | F3:4807  | 17112021_RID_2349_DP3.raw |         |        |
| K.KWMIEPQLINSSFQPEMETEGEFLNK.K | Y    | 56.53  | 3124.4885 | 26     | -0.5 | 1042.5029 | 3 | 65.30 | 3        | F3:19500 | 17112021_RID_2349_DP3.raw |         |        |
| K.SSTFTLTNIVPQFIK.L            | Y    | 54.61  | 1694.9243 | 15     | 1.1  | 848.4703  | 2 | 67.54 | 3        | F3:20255 | 17112021_RID_2349_DP3.raw |         |        |

total 4 peptid

TRINITY\_DN249  
[back to list](#)

[| Protein Coverage](#) | [| Supporting Peptides](#) |  
Protein Coverage:

1 MLLLLFLLSA SWSNVPTNGE VVDSFEANCP QFFLRETPPV IRHPPRSVRI CQRYQNLRYF ATLYNEDNCI PVYSAYIYNP

81 GKAKRPK**KWM IEPQLINSSF QPEMETEGEF LNK**KGSKEAL QESQAILQDY KNLTDCNR**GH LNPNGHQPDY SAKSSTFTLT**

161 **NIVPQFIK**LN GGAWNNYEQS TMVQMTKGCQ ETFAVVGAVP GDTSVSGGRV NRPSHLWSAA CCVIDNNHLR SWAILAR**NDQ**

241 **NVVETFTLGQ LEYQLAR**LYN VNRVSLFHSD CPRQ

Supporting Peptides:

| Peptide                        | Uniq | -10lgP | Mass      | Length | ppm  | m/z       | z | RT    | Fraction | Scan     | Source File               | Area F1 | Area F |
|--------------------------------|------|--------|-----------|--------|------|-----------|---|-------|----------|----------|---------------------------|---------|--------|
| R.NDQNVVETFTLGQLEYQLAR.L       | Y    | 78.63  | 2337.1602 | 20     | 0.1  | 1169.5875 | 2 | 68.98 | 3        | F3:20748 | 17112021_RID_2349_DP3.raw |         |        |
| R.GHLNPNNGHQPDYSAK.S           | Y    | 73.72  | 1633.7596 | 15     | 1.0  | 545.5944  | 3 | 20.98 | 3        | F3:4807  | 17112021_RID_2349_DP3.raw |         |        |
| K.KWMIEPQLINSSFQPEMETEGEFLNK.K | Y    | 56.53  | 3124.4885 | 26     | -0.5 | 1042.5029 | 3 | 65.30 | 3        | F3:19500 | 17112021_RID_2349_DP3.raw |         |        |
| K.SSTFTLTNIVPQFIK.L            | Y    | 54.61  | 1694.9243 | 15     | 1.1  | 848.4703  | 2 | 67.54 | 3        | F3:20255 | 17112021_RID_2349_DP3.raw |         |        |

total 4 peptid

TRINITY\_DN249  
[back to list](#)

[| Protein Coverage](#) | [| Supporting Peptides](#) |  
Protein Coverage:

1 MLLLLFLLSA SWSNVPTNGE VVDSFEANCP QFFLRETPPV IRHPPRSVRI CQRYQNLRYF ATLYNEDNCI PVYSAYIYNP

81 GKAKRPK**KWM IEPQLINSSF QPEMETEGEF LNK**KGSKEAL QESQAILQDY KNLTDCNR**GH LNPNGHQPDY SAKSSTFTLT**

161 **NIVPQFIK**LN GGAWNNYEQS TMVQMTKGCQ ETFAVVGAVP GDTSVSGGRV NRPSHLWSAA CCVIDNNHLR SWAILAR**NDQ**

241 **NVVETFTLGQ LEYQLAR**LYN VNRVSLFHSD CPRQ

Supporting Peptides:

| Peptide                        | Uniq | -10lgP | Mass      | Length | ppm  | m/z       | z | RT    | Fraction | Scan     | Source File               | Area F1 | Area F |
|--------------------------------|------|--------|-----------|--------|------|-----------|---|-------|----------|----------|---------------------------|---------|--------|
| R.NDQNVVETFTLGQLEYQLAR.L       | Y    | 78.63  | 2337.1602 | 20     | 0.1  | 1169.5875 | 2 | 68.98 | 3        | F3:20748 | 17112021_RID_2349_DP3.raw |         |        |
| R.GHLNPNNGHQPDYSAK.S           | Y    | 73.72  | 1633.7596 | 15     | 1.0  | 545.5944  | 3 | 20.98 | 3        | F3:4807  | 17112021_RID_2349_DP3.raw |         |        |
| K.KWMIEPQLINSSFQPEMETEGEFLNK.K | Y    | 56.53  | 3124.4885 | 26     | -0.5 | 1042.5029 | 3 | 65.30 | 3        | F3:19500 | 17112021_RID_2349_DP3.raw |         |        |
| K.SSTFTLTNIVPQFIK.L            | Y    | 54.61  | 1694.9243 | 15     | 1.1  | 848.4703  | 2 | 67.54 | 3        | F3:20255 | 17112021_RID_2349_DP3.raw |         |        |

total 4 peptid

TRINITY\_DN77  
[back to list](#)

[| Protein Coverage](#) | [| Supporting Peptides](#) |  
Protein Coverage:

1   MAAHGWLWGC LLFAVWGSLV LGQEK**IEVLE** **NK**AVSLPCKA IRSQPNPTRQ EWKFQ**KD**GT**T** **LLFY**HDNKFT DNYKDR**ATFT** 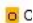

81   **PYEI**HLASVT **RK**DSGLYTCE VLGESFSQSQ VQLVVQVPAA **KPTAHVPSV** **TIGNK**VVLR**C** EETEANPRPT FKWF**KNDIQM**

161   **PLDPK**TSTIF KNSSYTIDAD TGVLA**FEPAT** ALDTGDYSCE AENKVGPPQR **SEVIHMETSE** LNVGGIVA**AV** VVLLIILGLV 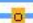

241   IFGIWFAYNR GYFSKRTTSG SKKVIYSQPS NRSDGDFKQT SSFLV

Supporting Peptides:

| Peptide               | Uniq | -10lgP | Mass      | Length | ppm  | m/z      | z | RT    | Fraction | Scan     | Source File               | Area F1 | Area F2 | Area F3 | Area F4  |
|-----------------------|------|--------|-----------|--------|------|----------|---|-------|----------|----------|---------------------------|---------|---------|---------|----------|
| R.ATFTPYEIHLASVTR.K   | Y    | 73.13  | 1704.8835 | 15     | 0.6  | 853.4496 | 2 | 49.18 | 4        | F4:14269 | 17112021_RID_2349_DP4.raw |         |         |         | 3.0429E6 |
| K.NDIQMPLDPK.T        | Y    | 67.48  | 1169.5751 | 10     | 0.6  | 585.7952 | 2 | 41.29 | 4        | F4:11774 | 17112021_RID_2349_DP4.raw |         |         |         | 7.7188E6 |
| R.SEVIHMETS.E         | Y    | 61.05  | 1031.4594 | 9      | 0.4  | 516.7372 | 2 | 31.03 | 4        | F4:8170  | 17112021_RID_2349_DP4.raw |         |         |         | 1.6121E6 |
| K.DGTTLFYHDNK.F       | Y    | 55.18  | 1422.6780 | 12     | 0.9  | 712.3469 | 2 | 45.59 | 4        | F4:13096 | 17112021_RID_2349_DP4.raw |         |         |         | 1.0471E6 |
| K.PTAHVPSVVTIGNK.V    | Y    | 48.30  | 1418.7881 | 14     | 0.6  | 473.9369 | 3 | 35.53 | 4        | F4:9662  | 17112021_RID_2349_DP4.raw |         |         |         | 9.978E5  |
| R.SEVIHM(+15.99)ETS.E | Y    | 43.01  | 1047.4542 | 9      | -0.1 | 524.7343 | 2 | 31.06 | 4        | F4:8181  | 17112021_RID_2349_DP4.raw |         |         |         | 4.2082E5 |
| K.IEVLENK.A           | Y    | 39.82  | 843.4702  | 7      | 0.1  | 422.7424 | 2 | 28.48 | 4        | F4:7332  | 17112021_RID_2349_DP4.raw |         |         |         | 1.5645E6 |

total 7 peptides

TRINITY\_DN77  
[back to list](#)

| [Protein Coverage](#) | [Supporting Peptides](#) |  
Protein Coverage:

1   MAAHGWLWGC LLFAVWGSLV LGQEK**IEVLE** **NK**AVSLPCKA IRSQPNPTRQ EWKFQ**KD**GT**T** **LLFY**HDNKFT DNYKDR**ATFT** 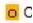

81   **PYEI**HLASVT **RK**DSGLYTCE VLGESFSQSQ VQLVVQVPAA **KPTAHVPSV** **TIGNK**VVLR**C** EETEANPRPT FKWF**KNDIQM**

161   **PLDPK**TSTIF KNSSYTIDAD TGVLA**FEPAT** ALDTGDYSCE AENKVGPPQR **SEVIHMETSE** 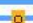

Supporting Peptides:

| Peptide             | Uniq | -10lgP | Mass      | Length | ppm  | m/z      | z | RT    | Fraction | Scan     | Source File               | Area F1 | Area F2 | Area F3 | Area F4  |
|---------------------|------|--------|-----------|--------|------|----------|---|-------|----------|----------|---------------------------|---------|---------|---------|----------|
| R.ATFTPYEIHLASVTR.K | Y    | 73.13  | 1704.8835 | 15     | 0.6  | 853.4496 | 2 | 49.18 | 4        | F4:14269 | 17112021_RID_2349_DP4.raw |         |         |         | 3.0429E6 |
| K.NDIQMPLDPK.T      | Y    | 67.48  | 1169.5751 | 10     | 0.6  | 585.7952 | 2 | 41.29 | 4        | F4:11774 | 17112021_RID_2349_DP4.raw |         |         |         | 7.7188E6 |
| R.SEVIHMETS         | Y    | 61.05  | 1031.4594 | 9      | 0.4  | 516.7372 | 2 | 31.03 | 4        | F4:8170  | 17112021_RID_2349_DP4.raw |         |         |         | 1.6121E6 |
| K.DGTTLFYHDNK.F     | Y    | 55.18  | 1422.6780 | 12     | 0.9  | 712.3469 | 2 | 45.59 | 4        | F4:13096 | 17112021_RID_2349_DP4.raw |         |         |         | 1.0471E6 |
| K.PTAHVPSVVTIGNK.V  | Y    | 48.30  | 1418.7881 | 14     | 0.6  | 473.9369 | 3 | 35.53 | 4        | F4:9662  | 17112021_RID_2349_DP4.raw |         |         |         | 9.978E5  |
| R.SEVIHM(+15.99)ETS | Y    | 43.01  | 1047.4542 | 9      | -0.1 | 524.7343 | 2 | 31.06 | 4        | F4:8181  | 17112021_RID_2349_DP4.raw |         |         |         | 4.2082E5 |
| K.IEVLENK.A         | Y    | 39.82  | 843.4702  | 7      | 0.1  | 422.7424 | 2 | 28.48 | 4        | F4:7332  | 17112021_RID_2349_DP4.raw |         |         |         | 1.5645E6 |

total 7 peptides

TRINITY\_DN3925  
[back to list](#)

| [Protein Coverage](#) | [Supporting Peptides](#) |  
Protein Coverage:

1   MYQLWIKCLA AWIFLKR**FNG** VHVMQAKAPM YPNEPFLVFW NAPTTQ**CRLR** YKVDLDLKT**F** HIVTNANDSL SGSAVTIFYS

81   NHLGVYPHID DRGHFFHGII PQNESLTK**HL** **DKSKSDINRM** IPLKTFHGLG VIDWENWRPQ WDRNWGSKNV YRNRSVQFAK

161   **DLHPELSEDK** **IR**RLAKKQYE KAAKS**FMRDT** LLLAEEMRPD GYGYYLYPD CQNYDYKTKG DQYTGK**CPEI** EMS**RNDQLLW**

241   **LWR**DSTALFP NVYLEIILRS SENALKFVHH RLKES**MRIAS** MAR**EDYALPV** **FAYAR**PFYAY TFEPLTQEDL VTTVGESAAM

321   GAAGIVFWGS MQYASTVDSC QKVKK**YMNGP** **LGR**YIVNVT AAKICSRVLC RKNGR**CVRKH** SDSK**AFLHLF** **PESFR**IMVHA

401   NATEKKVIVK GKLELENLIY LRENFMCHCY QGWKGLYCEE DSINDIRKI

Supporting Peptides:

| Peptide          | Uniq | -10lgP | Mass      | Length | ppm | m/z      | z | RT    | Fraction | Scan    | Source File               | Area F1  | Area F2  | Area F3  | Area F4 |
|------------------|------|--------|-----------|--------|-----|----------|---|-------|----------|---------|---------------------------|----------|----------|----------|---------|
| K.DLHPELSEDKIR.R | Y    | 69.19  | 1450.7416 | 12     | 0.1 | 484.5879 | 3 | 33.81 | 1        | F1:9852 | 12112021_RID_2349_DP1.raw | 1.1766E6 | 1.5248E5 | 1.0234E6 | 2.      |

total 6 peptides

| Peptide          | Uniq -10lgP | Mass  | Length    | ppm | m/z  | z        | RT      | Fraction | Scan     | Source File               | Area F1  | Area F2  | Area F3  | A |
|------------------|-------------|-------|-----------|-----|------|----------|---------|----------|----------|---------------------------|----------|----------|----------|---|
| R.EDYALPVFAYAR.P | Y           | 58.82 | 1413.6927 | 12  | 0.2  | 707.8538 | 2 59.74 | 3        | F3:17800 | 17112021_RID_2349_DP3.raw | 3.0486E5 | 2.0754E5 | 1.9353E6 |   |
| R.NDQLLWLWR.D    | Y           | 55.03 | 1242.6509 | 9   | 0.4  | 622.3329 | 2 65.33 | 3        | F3:19554 | 17112021_RID_2349_DP3.raw |          |          | 6.8841E5 |   |
| K.AFLHLFPESFR.I  | Y           | 54.74 | 1362.7084 | 11  | -0.4 | 455.2432 | 3 56.66 | 3        | F3:16716 | 17112021_RID_2349_DP3.raw |          |          | 6.974E5  |   |
| K.HLDKSKSDINR.M  | Y           | 48.25 | 1311.6895 | 11  | 0.3  | 438.2372 | 3 26.05 | 1        | F1:7151  | 12112021_RID_2349_DP1.raw | 0        |          |          |   |
| K.YMNGPLGR.Y     | Y           | 45.34 | 906.4382  | 8   | 0.1  | 454.2264 | 2 31.12 | 1        | F1:8845  | 12112021_RID_2349_DP1.raw | 3.6398E5 |          |          |   |

total 6 peptides

TRINITY\_DN3925  
[back to list](#)

[Protein Coverage](#) | [Supporting Peptides](#) |  
Protein Coverage:

1 MGSQSLPGTI ICFGLYSPGC YSWLLLFALP HLEGRSPHFV LDLILLWRST FGLCFTEALE RLLFWDLFRL PLSCAWTLPG  
81 GLDLEPNLNP CERTPTLGAF LELTVPEKLH IMYQLWIKCL AAWIFLKRNF GVHVMQAKAP MYPNEPFLVF WNAPTTCRL  
161 RYKVDLDLKT FHIVTNANDS LSGSAVTIFY SNHLGVYPHI DDRGHFFHGI IPQNESLTKH **LDKSKSDINR** MIPLKTFHGL  
241 GVIDWENWRP QWDRNWGSKN VYRNRSVQFA **KDLHPELSED KIR**RLAKKQY EKAAKSFMRD TLLLAEMRP DGYWGYYLYP  
321 DCQNYDYKTK GDQYTGKCPE IEMSR**NDQLL WLWR**DSTALF PNVYLEIILR SSENALKFVH HRLKESMRIA SMAR**EDYALP**  
401 **VFAYAR**PFYA YTFEPLTQED LVTTVGESAA MGAAGIVFWG SMQYASTVDS CQKVKK**YMNG PLGR**YIVNVT TAAKICSRVL  
481 CRKNGRCVRK HSDSK**AFLHL FPESFR**IMVH ANATEKKVIV KGKLELENLI YLRENFMCCHC YQGWKGLYCE EDSINDIRKI

Supporting Peptides:

| Peptide          | Uniq -10lgP | Mass  | Length    | ppm | m/z  | z        | RT      | Fraction | Scan     | Source File               | Area F1  | Area F2  | Area F3  | A  |
|------------------|-------------|-------|-----------|-----|------|----------|---------|----------|----------|---------------------------|----------|----------|----------|----|
| K.DLHPELSEDKIR.R | Y           | 69.19 | 1450.7416 | 12  | 0.1  | 484.5879 | 3 33.81 | 1        | F1:9852  | 12112021_RID_2349_DP1.raw | 1.1766E6 | 1.5248E5 | 1.0234E6 | 2. |
| R.EDYALPVFAYAR.P | Y           | 58.82 | 1413.6927 | 12  | 0.2  | 707.8538 | 2 59.74 | 3        | F3:17800 | 17112021_RID_2349_DP3.raw | 3.0486E5 | 2.0754E5 | 1.9353E6 |    |
| R.NDQLLWLWR.D    | Y           | 55.03 | 1242.6509 | 9   | 0.4  | 622.3329 | 2 65.33 | 3        | F3:19554 | 17112021_RID_2349_DP3.raw |          |          | 6.8841E5 |    |
| K.AFLHLFPESFR.I  | Y           | 54.74 | 1362.7084 | 11  | -0.4 | 455.2432 | 3 56.66 | 3        | F3:16716 | 17112021_RID_2349_DP3.raw |          |          | 6.974E5  |    |
| K.HLDKSKSDINR.M  | Y           | 48.25 | 1311.6895 | 11  | 0.3  | 438.2372 | 3 26.05 | 1        | F1:7151  | 12112021_RID_2349_DP1.raw | 0        |          |          |    |
| K.YMNGPLGR.Y     | Y           | 45.34 | 906.4382  | 8   | 0.1  | 454.2264 | 2 31.12 | 1        | F1:8845  | 12112021_RID_2349_DP1.raw | 3.6398E5 |          |          |    |

total 6 peptides

APB93444.1  
[back to list](#)

[Protein Coverage](#) | [Supporting Peptides](#) |  
Protein Coverage:

1 MGRFISVSFS FLVVFLSLSG TGADCPDWS SHEGHCHYKVF KER**KTWEDAE KE**CTEQAR**GG HLISLKSTEE** **VDFMIKLAYP**  
81 **ILKADLVWIG LR**DFWRDCHM GWRDHAQLLY KAWSDEPNCF AAK**TTDNQWL RR**KCNSSQYF VCQSRVPR

Supporting Peptides:

| Peptide                | Uniq -10lgP | Mass  | Length    | ppm | m/z  | z        | RT      | Fraction | Scan     | Source File               | Area F1  | Area F2  | Area F3 | A |
|------------------------|-------------|-------|-----------|-----|------|----------|---------|----------|----------|---------------------------|----------|----------|---------|---|
| K.STEEVDFMIK.L         | N           | 71.04 | 1197.5587 | 10  | 0.3  | 599.7868 | 2 46.71 | 5        | F5:13738 | 17112021_RID_2349_DP5.raw |          | 4.9086E5 |         |   |
| K.STEEVDFM(+15.99)IK.L | N           | 68.50 | 1213.5536 | 10  | 1.2  | 607.7848 | 2 41.28 | 7        | F7:11785 | 17112021_RID_2349_DP7.raw | 2.9758E5 | 1.0635E5 |         |   |
| K.TTDNQWLR.R           | N           | 59.51 | 1032.4989 | 8   | 0.4  | 517.2570 | 2 33.81 | 7        | F7:9330  | 17112021_RID_2349_DP7.raw |          |          |         |   |
| K.ADLVWIGLR.D          | Y           | 57.52 | 1041.5970 | 9   | 0.0  | 521.8058 | 2 58.17 | 5        | F5:17416 | 17112021_RID_2349_DP5.raw |          |          |         |   |
| K.TWEDAEC.F            | N           | 42.92 | 877.3817  | 7   | 0.0  | 439.6982 | 2 23.16 | 7        | F7:5532  | 17112021_RID_2349_DP7.raw |          |          |         |   |
| R.GGHLISLK.S           | N           | 41.82 | 823.4916  | 8   | 0.0  | 412.7531 | 2 27.22 | 7        | F7:6877  | 17112021_RID_2349_DP7.raw |          |          |         |   |
| R.KTWEDAEC.F           | N           | 40.81 | 1152.5450 | 9   | 0.6  | 577.2802 | 2 34.65 | 7        | F7:9456  | 17112021_RID_2349_DP7.raw |          |          |         |   |
| K.TWEDAEC.F            | N           | 40.38 | 1024.4502 | 8   | -0.9 | 513.2319 | 2 40.86 | 7        | F7:11654 | 17112021_RID_2349_DP7.raw |          |          |         |   |

total 9

| Peptide     | Uniq -10lgP | Mass  | Length   | ppm | m/z | z        | RT      | Fraction | Scan     | Source File               | Area F1 | Area F2 | Area F3 |
|-------------|-------------|-------|----------|-----|-----|----------|---------|----------|----------|---------------------------|---------|---------|---------|
| K.LAYPILK.A | N           | 40.30 | 816.5109 | 7   | 0.3 | 409.2628 | 2 42.38 | 5        | F5:12212 | 17112021_RID_2349_DP5.raw |         |         |         |

total 9

TRINITY\_DN195  
[back to list](#)

| [Protein Coverage](#) | [Supporting Peptides](#) |  
Protein Coverage:

1

LNSHAEAEQP AGAGLLGSGR GLGQVGGALR LRTWGICVKS APERRLALLA LLTCLPACLP AGPIMHSRLP VAAPLCLLLL

81

LLLPLWALP**AI MPGGLSPRDV TDPEVQEA**AV FAVEKYNAR**S ANDNYFKALR VVEAQSQVVS**GVKYYLKMEL VKTTCRKTVG

161

KPKLYQEIQN CNLPPENQQE ELTCQFEVWS RPWLQSTLLT KMSCN

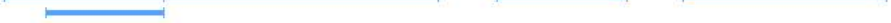

Supporting Peptides:

| Peptide               | Uniq -10lgP | Mass  | Length    | ppm | m/z  | z        | RT      | Fraction | Scan     | Source File               | Area F1 | Area F2 | Area F3 | Area F4 |
|-----------------------|-------------|-------|-----------|-----|------|----------|---------|----------|----------|---------------------------|---------|---------|---------|---------|
| R.DVTDPEVQEAAVFAVEK.Y | Y           | 82.05 | 1845.8995 | 17  | 0.6  | 923.9576 | 2 55.65 | 7        | F7:16625 | 17112021_RID_2349_DP7.raw |         |         |         |         |
| R.VVEAQSQVVSGVK.Y     | Y           | 75.55 | 1328.7300 | 13  | 0.3  | 665.3724 | 2 29.88 | 7        | F7:7845  | 17112021_RID_2349_DP7.raw |         |         |         |         |
| R.SANDNYFK.A          | Y           | 48.33 | 957.4192  | 8   | 0.0  | 479.7169 | 2 26.12 | 7        | F7:6538  | 17112021_RID_2349_DP7.raw |         |         |         |         |
| P.AIMPGGLSPR.D        | Y           | 46.28 | 997.5378  | 10  | 0.8  | 499.7766 | 2 38.34 | 7        | F7:10743 | 17112021_RID_2349_DP7.raw |         |         |         |         |
| I.MPGGLSPR.D          | Y           | 44.41 | 813.4167  | 8   | -0.3 | 407.7155 | 2 28.28 | 7        | F7:7342  | 17112021_RID_2349_DP7.raw |         |         |         |         |

total 5 peptides

TRINITY\_DN1793  
[back to list](#)

| [Protein Coverage](#) | [Supporting Peptides](#) |  
Protein Coverage:

1

MIAFIVLPIL AAVLQSSGS**VDFDSESPRK PEIQNEIVDL HNTLR**SVNP TASNMLKMEW YPEAAANAER WAFRCIYDHS

81

PRDSRVIGGI KCGENIYMSP YPMKWTAIH EWHDEKKNFV YGQGASPANA VVGHYTQVVW YKSYSRSGCAA AYCPSKYN

161

FYVCQYCPAG NIIGKTATPY TSGPPCGDCP SACDNGLCTN PCRREDEFTN CKDLVKQGCH SNYLKTNCPA SCFCHNEII

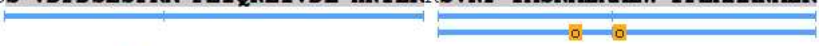

Supporting Peptides:

| Peptide                   | Uniq -10lgP | Mass  | Length    | ppm | m/z  | z        | RT      | Fraction | Scan     | Source File               | Area F1  | Area F2 | Area F3 | Area F4 |
|---------------------------|-------------|-------|-----------|-----|------|----------|---------|----------|----------|---------------------------|----------|---------|---------|---------|
| K.MEWYPEAAANAER.W         | N           | 85.56 | 1536.6667 | 13  | 0.5  | 769.3411 | 2 45.12 | 7        | F7:13118 | 17112021_RID_2349_DP7.raw |          |         |         |         |
| K.M(+15.99)EWYPEAAANAER.W | N           | 83.36 | 1552.6616 | 13  | 0.4  | 777.3384 | 2 40.79 | 7        | F7:11501 | 17112021_RID_2349_DP7.raw |          |         |         |         |
| G.SVDFDSESPR.K            | N           | 67.58 | 1137.4938 | 10  | -0.1 | 569.7541 | 2 30.74 | 7        | F7:8132  | 17112021_RID_2349_DP7.raw | 4.0226E4 |         |         |         |
| R.KPEIQNEIVDLHNTLR.R      | Y           | 67.27 | 1918.0272 | 16  | 0.5  | 640.3500 | 3 44.88 | 4        | F4:12951 | 17112021_RID_2349_DP4.raw |          |         |         |         |
| R.SVNPTASNMLK.M           | N           | 53.18 | 1160.5859 | 11  | 0.3  | 581.3004 | 2 32.34 | 4        | F4:8661  | 17112021_RID_2349_DP4.raw |          |         |         |         |
| R.SVNPTASN(+15.99)LK.M    | N           | 48.77 | 1176.5808 | 11  | 0.8  | 589.2982 | 2 24.27 | 4        | F4:5833  | 17112021_RID_2349_DP4.raw |          |         |         |         |

total 6

TRINITY\_DN240  
[back to list](#)

| [Protein Coverage](#) | [Supporting Peptides](#) |  
Protein Coverage:

1

ICGGTTLINQQ WVLSAAHCDM ENMQIYGLGH NFRLPNKDQK RRVAEEKFFC LSNKSYTK**WD KDIMLIK**LN**R VKTSTHITP**

81

**LSLPSNPPRL** RSVCRIMGWG SITSPNGRDH CLYSQTQLLM

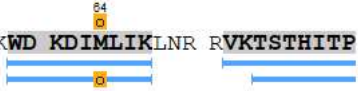

Supporting Peptides:

| Peptide                | Uniq -10lgP | Mass  | Length    | ppm | m/z  | z        | RT      | Fraction | Scan     | Source File               | Area F1  | Area F2  | Area F3 | Area F4 |
|------------------------|-------------|-------|-----------|-----|------|----------|---------|----------|----------|---------------------------|----------|----------|---------|---------|
| K.TSTHITPLSLPSNPPR.L   | Y           | 84.36 | 1716.9159 | 16  | 0.1  | 859.4653 | 2 41.01 | 3        | F3:11600 | 17112021_RID_2349_DP3.raw |          | 7.6443E6 | 4.73    |         |
| K.WDKDIMLIK.L          | N           | 57.12 | 1160.6263 | 9   | -0.1 | 581.3204 | 2 46.64 | 2        | F2:13338 | 12112021_RID_2349_DP2.raw | 2.1169E5 | 9.915E6  | 1.51    |         |
| K.WDKDIM(+15.99)LIK.L  | N           | 52.20 | 1176.6212 | 9   | -0.2 | 589.3177 | 2 41.27 | 2        | F2:11445 | 12112021_RID_2349_DP2.raw |          | 6.6323E6 | 2.11    |         |
| R.VKTSTHITPLSLPSNPPR.L | Y           | 50.77 | 1944.0792 | 18  | 0.2  | 649.0338 | 3 40.72 | 2        | F2:11199 | 12112021_RID_2349_DP2.raw |          | 5.1195E5 | 1.00    |         |

total 4

| Peptide                                                                | Uniq | -10lgP | Mass     | Length | ppm  | m/z      | z | RT    | Fraction | Scan    | Source File               | Area F1 | Area F2 | Area |
|------------------------------------------------------------------------|------|--------|----------|--------|------|----------|---|-------|----------|---------|---------------------------|---------|---------|------|
| P.LSLPSNPPR.L                                                          | N    | 41.33  | 979.5450 | 9      | -0.2 | 490.7797 | 2 | 34.94 | 7        | F7:9564 | 17112021_RID_2349_DP7.raw |         |         |      |
| total :                                                                |      |        |          |        |      |          |   |       |          |         |                           |         |         |      |
| TRINITY_DN240                                                          |      |        |          |        |      |          |   |       |          |         |                           |         |         |      |
| <a href="#">back to list</a>                                           |      |        |          |        |      |          |   |       |          |         |                           |         |         |      |
| <a href="#">Protein Coverage</a>   <a href="#">Supporting Peptides</a> |      |        |          |        |      |          |   |       |          |         |                           |         |         |      |
| Protein Coverage:                                                      |      |        |          |        |      |          |   |       |          |         |                           |         |         |      |

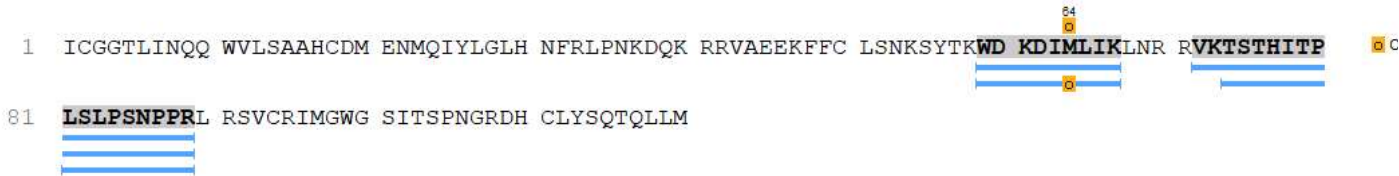

| Supporting Peptides:                                                   |      |        |           |        |      |          |   |       |          |          |                           |          |         |      |
|------------------------------------------------------------------------|------|--------|-----------|--------|------|----------|---|-------|----------|----------|---------------------------|----------|---------|------|
| Peptide                                                                | Uniq | -10lgP | Mass      | Length | ppm  | m/z      | z | RT    | Fraction | Scan     | Source File               | Area F1  | Area F2 | Area |
| K.TSTHITPLSLPSNPPR.L                                                   | Y    | 84.36  | 1716.9159 | 16     | 0.1  | 859.4653 | 2 | 41.01 | 3        | F3:11600 | 17112021_RID_2349_DP3.raw | 7.6443E6 | 4.73    |      |
| K.WDKDIMLIK.L                                                          | N    | 57.12  | 1160.6263 | 9      | -0.1 | 581.3204 | 2 | 46.64 | 2        | F2:13338 | 12112021_RID_2349_DP2.raw | 2.1169E5 | 9.915E6 | 1.51 |
| K.WDKDIM(+15.99)LIK.L                                                  | N    | 52.20  | 1176.6212 | 9      | -0.2 | 589.3177 | 2 | 41.27 | 2        | F2:11445 | 12112021_RID_2349_DP2.raw | 6.6323E6 | 2.11    |      |
| R.VKTSTHITPLSLPSNPPR.L                                                 | Y    | 50.77  | 1944.0792 | 18     | 0.2  | 649.0338 | 3 | 40.72 | 2        | F2:11199 | 12112021_RID_2349_DP2.raw | 5.1195E5 | 1.00    |      |
| P.LSLPSNPPR.L                                                          | N    | 41.33  | 979.5450  | 9      | -0.2 | 490.7797 | 2 | 34.94 | 7        | F7:9564  | 17112021_RID_2349_DP7.raw |          |         |      |
| total :                                                                |      |        |           |        |      |          |   |       |          |          |                           |          |         |      |
| TRINITY_DN240                                                          |      |        |           |        |      |          |   |       |          |          |                           |          |         |      |
| <a href="#">back to list</a>                                           |      |        |           |        |      |          |   |       |          |          |                           |          |         |      |
| <a href="#">Protein Coverage</a>   <a href="#">Supporting Peptides</a> |      |        |           |        |      |          |   |       |          |          |                           |          |         |      |
| Protein Coverage:                                                      |      |        |           |        |      |          |   |       |          |          |                           |          |         |      |

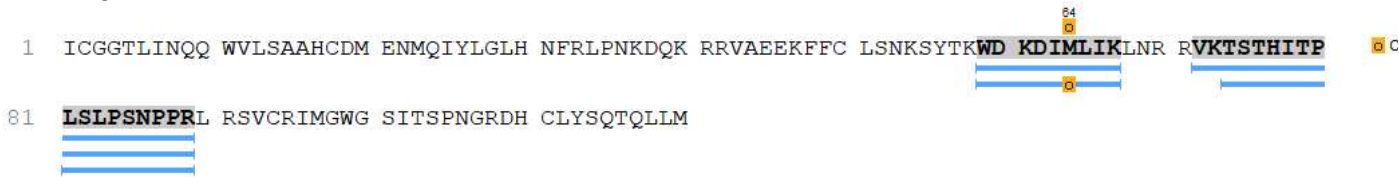

| Supporting Peptides:                                                   |      |        |           |        |      |          |   |       |          |          |                           |          |         |      |
|------------------------------------------------------------------------|------|--------|-----------|--------|------|----------|---|-------|----------|----------|---------------------------|----------|---------|------|
| Peptide                                                                | Uniq | -10lgP | Mass      | Length | ppm  | m/z      | z | RT    | Fraction | Scan     | Source File               | Area F1  | Area F2 | Area |
| K.TSTHITPLSLPSNPPR.L                                                   | Y    | 84.36  | 1716.9159 | 16     | 0.1  | 859.4653 | 2 | 41.01 | 3        | F3:11600 | 17112021_RID_2349_DP3.raw | 7.6443E6 | 4.73    |      |
| K.WDKDIMLIK.L                                                          | N    | 57.12  | 1160.6263 | 9      | -0.1 | 581.3204 | 2 | 46.64 | 2        | F2:13338 | 12112021_RID_2349_DP2.raw | 2.1169E5 | 9.915E6 | 1.51 |
| K.WDKDIM(+15.99)LIK.L                                                  | N    | 52.20  | 1176.6212 | 9      | -0.2 | 589.3177 | 2 | 41.27 | 2        | F2:11445 | 12112021_RID_2349_DP2.raw | 6.6323E6 | 2.11    |      |
| R.VKTSTHITPLSLPSNPPR.L                                                 | Y    | 50.77  | 1944.0792 | 18     | 0.2  | 649.0338 | 3 | 40.72 | 2        | F2:11199 | 12112021_RID_2349_DP2.raw | 5.1195E5 | 1.00    |      |
| P.LSLPSNPPR.L                                                          | N    | 41.33  | 979.5450  | 9      | -0.2 | 490.7797 | 2 | 34.94 | 7        | F7:9564  | 17112021_RID_2349_DP7.raw |          |         |      |
| total :                                                                |      |        |           |        |      |          |   |       |          |          |                           |          |         |      |
| TRINITY_DN240                                                          |      |        |           |        |      |          |   |       |          |          |                           |          |         |      |
| <a href="#">back to list</a>                                           |      |        |           |        |      |          |   |       |          |          |                           |          |         |      |
| <a href="#">Protein Coverage</a>   <a href="#">Supporting Peptides</a> |      |        |           |        |      |          |   |       |          |          |                           |          |         |      |
| Protein Coverage:                                                      |      |        |           |        |      |          |   |       |          |          |                           |          |         |      |

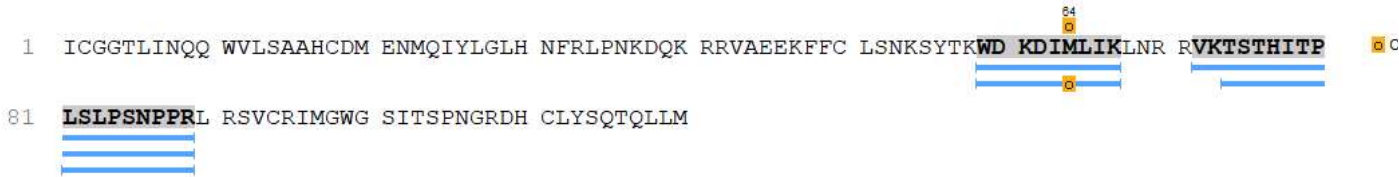

| Supporting Peptides:  |      |        |           |        |      |          |   |       |          |          |                           |          |         |      |
|-----------------------|------|--------|-----------|--------|------|----------|---|-------|----------|----------|---------------------------|----------|---------|------|
| Peptide               | Uniq | -10lgP | Mass      | Length | ppm  | m/z      | z | RT    | Fraction | Scan     | Source File               | Area F1  | Area F2 | Area |
| K.TSTHITPLSLPSNPPR.L  | Y    | 84.36  | 1716.9159 | 16     | 0.1  | 859.4653 | 2 | 41.01 | 3        | F3:11600 | 17112021_RID_2349_DP3.raw | 7.6443E6 | 4.73    |      |
| K.WDKDIMLIK.L         | N    | 57.12  | 1160.6263 | 9      | -0.1 | 581.3204 | 2 | 46.64 | 2        | F2:13338 | 12112021_RID_2349_DP2.raw | 2.1169E5 | 9.915E6 | 1.51 |
| K.WDKDIM(+15.99)LIK.L | N    | 52.20  | 1176.6212 | 9      | -0.2 | 589.3177 | 2 | 41.27 | 2        | F2:11445 | 12112021_RID_2349_DP2.raw | 6.6323E6 | 2.11    |      |
| total :               |      |        |           |        |      |          |   |       |          |          |                           |          |         |      |

| Peptide                | Uniq | -10lgP | Mass      | Length | ppm  | m/z      | z | RT    | Fraction | Scan     | Source File               | Area F1  | Area F2 | Area |
|------------------------|------|--------|-----------|--------|------|----------|---|-------|----------|----------|---------------------------|----------|---------|------|
| R.VKTSTHITPLSLPSNPPR.L | Y    | 50.77  | 1944.0792 | 18     | 0.2  | 649.0338 | 3 | 40.72 | 2        | F2:11199 | 12112021_RID_2349_DP2.raw | 5.1195E5 | 1.00    |      |
| P.LSLPSNPPR.L          | N    | 41.33  | 979.5450  | 9      | -0.2 | 490.7797 | 2 | 34.94 | 7        | F7:9564  | 17112021_RID_2349_DP7.raw |          |         |      |

total :

TRINITY\_DN240  
[back to list](#)

| [Protein Coverage](#) | [Supporting Peptides](#) |  
Protein Coverage:

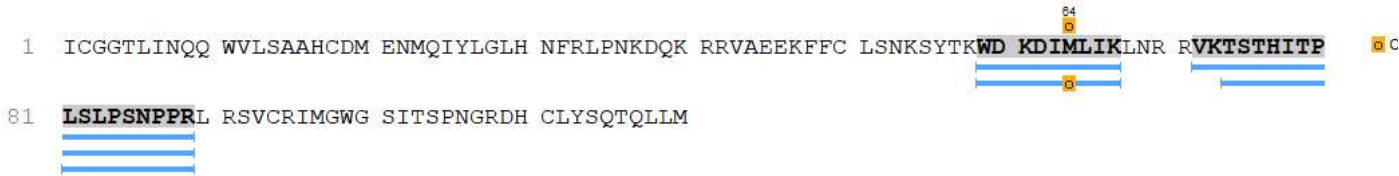

Supporting Peptides:

| Peptide                | Uniq | -10lgP | Mass      | Length | ppm  | m/z      | z | RT    | Fraction | Scan     | Source File               | Area F1  | Area F2 | Area |
|------------------------|------|--------|-----------|--------|------|----------|---|-------|----------|----------|---------------------------|----------|---------|------|
| K.TSTHITPLSLPSNPPR.L   | Y    | 84.36  | 1716.9159 | 16     | 0.1  | 859.4653 | 2 | 41.01 | 3        | F3:11600 | 17112021_RID_2349_DP3.raw | 7.6443E6 | 4.73    |      |
| K.WDKDIMLIK.L          | N    | 57.12  | 1160.6263 | 9      | -0.1 | 581.3204 | 2 | 46.64 | 2        | F2:13338 | 12112021_RID_2349_DP2.raw | 2.1169E5 | 9.915E6 | 1.51 |
| K.WDKDIM(+15.99)LIK.L  | N    | 52.20  | 1176.6212 | 9      | -0.2 | 589.3177 | 2 | 41.27 | 2        | F2:11445 | 12112021_RID_2349_DP2.raw | 6.6323E6 | 2.11    |      |
| R.VKTSTHITPLSLPSNPPR.L | Y    | 50.77  | 1944.0792 | 18     | 0.2  | 649.0338 | 3 | 40.72 | 2        | F2:11199 | 12112021_RID_2349_DP2.raw | 5.1195E5 | 1.00    |      |
| P.LSLPSNPPR.L          | N    | 41.33  | 979.5450  | 9      | -0.2 | 490.7797 | 2 | 34.94 | 7        | F7:9564  | 17112021_RID_2349_DP7.raw |          |         |      |

total :

TRINITY\_DN240  
[back to list](#)

| [Protein Coverage](#) | [Supporting Peptides](#) |  
Protein Coverage:

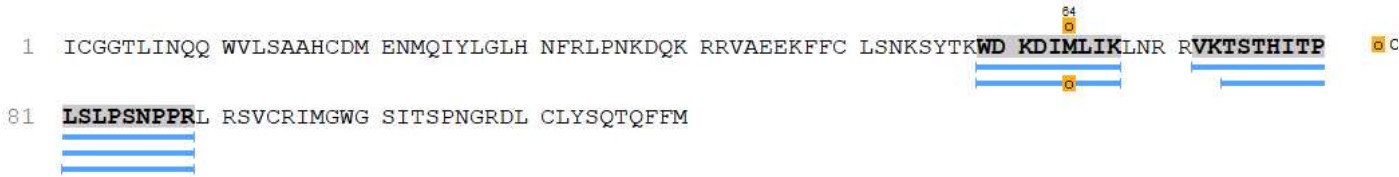

Supporting Peptides:

| Peptide                | Uniq | -10lgP | Mass      | Length | ppm  | m/z      | z | RT    | Fraction | Scan     | Source File               | Area F1  | Area F2 | Area |
|------------------------|------|--------|-----------|--------|------|----------|---|-------|----------|----------|---------------------------|----------|---------|------|
| K.TSTHITPLSLPSNPPR.L   | Y    | 84.36  | 1716.9159 | 16     | 0.1  | 859.4653 | 2 | 41.01 | 3        | F3:11600 | 17112021_RID_2349_DP3.raw | 7.6443E6 | 4.73    |      |
| K.WDKDIMLIK.L          | N    | 57.12  | 1160.6263 | 9      | -0.1 | 581.3204 | 2 | 46.64 | 2        | F2:13338 | 12112021_RID_2349_DP2.raw | 2.1169E5 | 9.915E6 | 1.51 |
| K.WDKDIM(+15.99)LIK.L  | N    | 52.20  | 1176.6212 | 9      | -0.2 | 589.3177 | 2 | 41.27 | 2        | F2:11445 | 12112021_RID_2349_DP2.raw | 6.6323E6 | 2.11    |      |
| R.VKTSTHITPLSLPSNPPR.L | Y    | 50.77  | 1944.0792 | 18     | 0.2  | 649.0338 | 3 | 40.72 | 2        | F2:11199 | 12112021_RID_2349_DP2.raw | 5.1195E5 | 1.00    |      |
| P.LSLPSNPPR.L          | N    | 41.33  | 979.5450  | 9      | -0.2 | 490.7797 | 2 | 34.94 | 7        | F7:9564  | 17112021_RID_2349_DP7.raw |          |         |      |

total :

ETE70217.1  
[back to list](#)

| [Protein Coverage](#) | [Supporting Peptides](#) |  
Protein Coverage:

1 MPMFFFPFEGS HISRLDGQLP QQYRIKETGR GENCSYCLQS TWLPRAGLRY PFIMNTYSFR QSSSTISGGG FGGSSSFRTF  
81 SIHGGSGGYG ISVSSARLGS SPGFGGGLGS GLGGGSFSYG SGCFGGAGGA GGVFGGNLNV SDSLLSGNEK ITMQNLNDRL  
161 ANYLDKVRAL **EEANTELEVK** IREWYQKQGP TATRDYSPYY KTIEELRDKI LVETIENKMK ILQIDNARLA ADDFKTKFET  
241 EQALRMSVEA DINGLRRVLD ELTLRADLE MQIESLKEEL AYLKKNHEEE MSALSGQLGG QVSVEVDSAP GIDLTKILAD  
321 MRDQYELLAE KNRRDAEAWF SSKTEELNKE VAINTEQLQT SKTEITDLRR TLQGLEIELQ SQLSMKTALE GTLADTEGRY  
401 GSQLCQIQSL ISNIEAQLVE VRSDMERQNN DYKMLMDIKT RLEQEIGTYR QLLDQGDFNL ASELSFTMSY YYQSSSSSYG  
481 GGGGGGSGRV ASVRLGPSSI HGGAGGRVSA SSARFVSSGS GYGGGYGYGS GLGGGCGIGY GSGGGVGYGS CFGGGVGGGY  
561 GGGLDFAVCS GGGGDGGLLT GNEKITMQNL NDRLANYLDK VRALEEANTE LEIKIRDWHQ RQAPSSPTKD YSHYYKTISE  
641 LRDKIHDTTI DNSRIILEID NAR**LAADDFR** LKYENELHLR QGVESDINGL RRVLDLTLF KSDMEMQIEE KKEDLAYLKK  
721 NHEELMKEYG SQLTGKVSVE MDAAPGVDLT KILADMREQY EQMAERNRRD AEAWFFTKTE ELNREVATHT EQLQTSKTEI  
801 SELRRTIQSL EIELQSQLSM KAGLETSLAE TEGRYCAQLA QIQTLITGVE EQLADLRNDM ERQNHEYRML MDIK**TRLEQE**  
881 **IATYR**NLLEG QDSKSGSKQLK LVKMKNQTKL KSADYFAGLG SPCVPSPSNC SFPHHEEESF SCNVKEMIEF SNSHFSNYLK  
961 GVHTLECENA GLECKIREWF EMNSSHGFYH LSSGYLGGPS GCLLQPIGDC YRTSNFHGVS SSLPMPLSFG SPIWLASDAE  
1041 TSWGTFSGSQ GNLFMGGNEK RTMQELNDRL ASYLEKVRSL EEANTQLEGC IREWHQKRSH GTQRDFKDYE HNISDMHERI  
1121 ETGRVTNAGL VLQIDNAKMA TEDFRLKYEA EKALRQNVQN DVENIRKELD NMTIITDLE MEIEALREDH ILKKKEHETN  
1201 MQAHGSPKDF KVNKVKNTPT QEDLSKILAG IRADYEAIE KNRRSLDSWF QQQIGNESSE GQHNQEELQN SQKEICELNR  
1281 TLQTLIDFQ TELNKKFALE NNMGETKARY AFQLQSIQNL IKKCEEELSK FRHDIKYQNN QYKVLFGIKT RLEREISTYR  
1361 QLLDGNVDGK TSTSFREHRS SNQNLKKIVQ ETVDGEEEEEE EDSKDSVNSE THIYTLPMAR SGSVNLNKVF FESGGPSAAG  
1441 SIYRMSSIKK PRTPSVHGGG GGFGRTRISFG SNYSNTFGSN LLRSTSINEL LLTSNEKTTM QNLNDRLAAY LEKVHSLSTS  
1521 NSVLEKQIRE WYKSSPIVK QDYNAFFKVI EELQDKITKA RIDNTRIILQ IDNSKLAADD FRVKYETELS LRLNVENDIT  
1601 GLQGLIDELT LVRTDLEHQI ESLKEELAYL KKQHEEETAG LRRQLSGNVS VEVDAAPGID LAQAMENMRQ QEILAEKNR  
1681 QEAKDRFDKL IEQLNVEVTT TTHQLETHRS EITDRRNTLQ SLEIELQSQL SWKTERENAV AEIEAHYRTI LTQIQMAIGN  
1761 IEAQLMQLRS DMEQQSIEYS ILLDIKVKLE VEIATYRRL EGENWRMITS DLETSKEAEK GGGGRLSGD EKQTMQNLND  
1841 RLATYLGNVQ ALEEANSELE SKIAEWYEMF AAGNQAGQQQ DYSEYYAII DLRNQIVATS IDNGTMILQI DNARLAGADF  
1921 KLKYDNELAL HQSVEMDTNG LRKALEEIEI TSSDLKVQIN SFTEELEYMK KNHEEDMGSM NGSTAAGGIN VEMNVTPGVD  
2001 LTTLLNEMRG EYEVLAEQNR EDIETWFNEQ SQELNKQINT SVEETSTNKS EITELKRALQ SLEIELQSQQ SLKQSLEATL  
2081 VETESQYCGQ LSQIQEVIGS VEGQVQQIRD DMECQNREYE QLLDVKIRLE NEIDTYRSL DGSERESSSG IQSRSGESAE  
2161 QRFKIQEYAT SQSQSKGSGS GDSKQTDKLG SGNNPRDPQK TRVIRTIVED RIGDQVVSTR RGSSTGSFSS GVVWGFRRSGW  
2241 GKTGGGGGGA TGSCFHIYNS SPAGGDVGLL AGGDKETMQN LNDRLASYLA KVHALEEANG DLEQKIRNWX QKSATHINEG  
2321 LHNDKSYNSS IDDLRNKIIA ASIRNASMIL QIDNARLAAD DFRMKYENEL FLHQNV EADI NGLKKVLDEL SMSKSDLEIQ  
2401 IESLIEELAF LKKNHEEEMK NWQGTVAGDI NVEINAAPGV DLTAILNKMR TEYEALAEQN RKDAETWFVE KSKELNMTIN  
2481 MSAKETTTNK KEITDLRHTL QSLEIDLKTQ LSLRQSLEST LAETEGQYCA QLLQIQGTIS NVENQVQQIR EDMCQNADY  
2561 RCLLDIKIRL **ENEIETYRHL** IDGEALGKGM KELSGKRGES VQRSSKDLGS QNLRSEKSGS LRASGSDSRS TKTGTETSTR  
2641 KSEARNVEAT TKDKEIKKTR VIKTIEELD EYGRVTSSKV QSLACWHSTG LPSCSNTMAL SVLTSGSSRQ ISSYSMGGGG  
2721 SVRLSSGVGF SGGSKFTGGY SGGGFGGGSL AGGYGTGMGG GFASGSFAGG FGGGFGVGGG DGGLLTGDEK QTMQNLNDRL  
2801 ANYLGKVHAL EEANAELEVK IKEWYAKFST PDTDRDYSKY FNIEDLRNQ ICRHTIENAG IVLQVDNARL AADDFKLKVL  
2881 DDLTMNKSDL ELQIESLNEE LLYLKKNHEE ELMSFRGVTS GDVTVEMDAA PGVDLTKLLN DMRAQYEELA DKNRREAEQ  
2961 FNKQARTIYL NVGALRQEIS ANVDQLSSSK SEVTELRRMT QGLELELQAQ IAMQSLEGT LAETERNYCD QLGQIQIQIS  
3041 SLEEQLLQIR SDMENQNAEY QQLLGKIKTRL EKEIETYHRL LEGEGGSALN EASQTGVPQP FPPRHSPPW DDGIEAREQL  
3121 AAESANSKGS KVEDRISEKQ IILFMSKSFK KISSYEGGAK MSGIGGGSGLY GFGGSGMGGG GSSYGGAIKS GYGGSGFGGG  
3201 VGFGSASVAG GSYGANYSR SSVSMGAYG AGDSVFLAGA EKETMQNLNS RLANYLEKVR SLEEANAEE RKIRHWYKRN  
3281 GPGAPGVTRD YSKYHHMIDE LRNQIVNVTI ENANVVLQID NARLAADDFR MKFENELFLR QSVEGDINGL RRVLDLTMN  
3361 RSDLEAQLS LTELAYLKK NHEEEMTLR SSSTGDTVTE MNAAPGIDLT KLLNDMRAQY EDLAEQNRRE AEEQFIKMSQ  
3441 PLQQQIHDDA GAASTARNEL IELKRSFQSL EIELQSLAK KASLEGLTAE TEGNYSTQLS QLQLQVSSLE EQLQQIRAET  
3521 ECQNSEYQQL LGIKTRLEME IETYRRLDG ESIRTAYETK VQIREPTKTR VVKTIVEELV DGKVISSQVK SAGNVLQSS  
3601 HPINKVQLAK VEDGSSMELS QLLNEIRANY ETLFSRSQIE TILSAGTQVI YSLQLQEQT TLQKEQMNDN LFQKVGGSLL  
3681 QVKFKFSLFL TMLTWHCKYS LQLEKVITAR MNKDEEILKA ARAELNEARR QWHHMQTEID SLHAMERGLE NSLQATELRY  
3761 QTQLKHLETE IEDLEKELQE VRQDIEKQLQ QHEILLNSKM RLEQEIATYR SLEKEEKRY LCLNRLRLTE KVDEVKEWE  
3841 GSFFKDNPHL RKKSLSLRFD LHLAATDEDC LHMKQKSRPD IEVRLVMRRS CSIPSIKT

Supporting Peptides:

| Peptide            | Uniq -10lgP | Mass      | Length | ppm | m/z      | z | RT    | Fraction | Scan    | Source File               | Area F1 | Area F2 | Area F3 | A |
|--------------------|-------------|-----------|--------|-----|----------|---|-------|----------|---------|---------------------------|---------|---------|---------|---|
| R.ALEEANTELEVK.I N | 67.86       | 1344.6772 | 12     | 0.3 | 673.3461 | 2 | 36.35 | 6        | F6:9844 | 17112021_RID_2349_DP6.raw |         |         |         |   |

| Peptide         | Uniq -10lgP | Mass  | Length    | ppm | m/z  | z        | RT      | Fraction | Scan     | Source File               | Area F1  | Area F2  | Area F3  | A  |
|-----------------|-------------|-------|-----------|-----|------|----------|---------|----------|----------|---------------------------|----------|----------|----------|----|
| K.TRLEQEIATYR.N | N           | 60.70 | 1378.7205 | 11  | -0.1 | 690.3674 | 2 36.59 | 4        | F4:9988  | 17112021_RID_2349_DP4.raw |          | 4.6159E4 |          | 9. |
| R.LEQEIATYR.N   | N           | 59.72 | 1121.5717 | 9   | -0.1 | 561.7930 | 2 32.42 | 6        | F6:8521  | 17112021_RID_2349_DP6.raw | 2.3192E4 |          |          |    |
| R.LAADDFRLK.Y   | N           | 56.97 | 1047.5713 | 9   | 0.6  | 524.7932 | 2 38.21 | 1        | F1:11342 | 12112021_RID_2349_DP1.raw | 4.5823E5 |          |          | 8. |
| R.LAADDFR.L     | N           | 55.06 | 806.3922  | 7   | 0.0  | 404.2034 | 2 31.43 | 2        | F2:8068  | 12112021_RID_2349_DP2.raw | 2.1578E6 | 1.4275E6 | 3.7768E6 | 7. |
| R.LENEIETYR.H   | Y           | 50.96 | 1165.5615 | 9   | -0.2 | 583.7879 | 2 33.11 | 6        | F6:8783  | 17112021_RID_2349_DP6.raw |          |          |          |    |

total 6 pepti

XP\_034291429.1  
[back to list](#)

[Protein Coverage](#) | [Supporting Peptides](#) |  
Protein Coverage:

|     |            |             |            |            |            |            |            |            |  |  |  |  |  |  |
|-----|------------|-------------|------------|------------|------------|------------|------------|------------|--|--|--|--|--|--|
| 1   | MAKGFFISKS | LGIVGIVLGL  | GAVATIIALS | VVYTQEKQRA | DNALANQGGS | STITAGATIA | GTVQATTAGA | TRATTASTTR |  |  |  |  |  |  |
| 81  | ATTASTTRAT | TAGANSTITT  | KPLEPWDHMR | LPKTLMPTFY | TISLQPFKE  | VSPDFYIFKG | NSTVEFQCKQ | PTDLILIHKS |  |  |  |  |  |  |
| 161 | KLNYTLQETF | LASLTGINVV  | APAIERTWL  | EKTEYLVVKL | KEKLQQDKAY | RLHAEFTGEL | ADDLAGFYRS | AYMEEGKSKL |  |  |  |  |  |  |
| 241 | VATTQMQAAD | ARKAFPCFDE  | PAMKANFSIT | LIHLPAYKAL | SNMPINKTEE | VAMSDGSIWT | RTEFEPTLKM | STYLLAFIVS |  |  |  |  |  |  |
| 321 | EFENVSAIQH | NTLIQIWGRP  | KSIKEGQGDY | ALNVSWPILS | FFEQQYNVPY | PLKRLDQVAL | PDFNAGAMEN | WGLITYRESA |  |  |  |  |  |  |
| 401 | LLFDPEFSSI | GNKERIVTVI  | AHEVAHQWFG | NLVTLEWVNE | LWLNEGFASY | VEYLGANEAE | PTWNIKDLIV | PNDVYRVMAI |  |  |  |  |  |  |
| 481 | DALASSHPLS | SPAEIEINTPA | QISEVFDSIS | YSKGASVIRM | LSEFLTEPVF | REGLQSYFET | YQYENTVCDD | LWKQLQLVNV |  |  |  |  |  |  |
| 561 | KKNMSLPDVT | KTIMDRWTLQ  | MGFPVLTNT  | TTGIITQKHF | LLDPESPVER | PSQFNWTWIV | PVSWLSKGKE | AEMYWLTDTS |  |  |  |  |  |  |
| 641 | AENANFSTSA | NPAQWLLLN   | NVVGYFRVNY | DLENWERLMN | QLNDDLQKIP | VLNR       | AQIIDD     | AFNLARAKHV |  |  |  |  |  |  |
| 721 | YLAKEREYLP | WDTALDNLDY  | FR         | LMFDRSEV   | YGPMQKYIQK | QVTPLFDHFK | KITLNWTQIP | DGLMDQYNQI |  |  |  |  |  |  |
| 801 | IPECNELASS | WFKAWKANPS  | INRIPPNLRS | AIYCSAIRTG | GVEAWDFAWQ | MFQQAQVISE | ADKLRGALTC | SQTPWILQRY |  |  |  |  |  |  |
| 881 | LQYTLNSTLI | RRQDATSTIN  | SIASNVVGQP | LAWDFVRMNW | RTLQFQFGGS | SFSFSSLIQS | VTQRFASPF  | LQQLEQFKAD |  |  |  |  |  |  |
| 961 | NADVGFGSAT | RALEQALERT  | KANIKWVAEN | QPLVLQWFKE | NS         |            |            |            |  |  |  |  |  |  |

Supporting Peptides:

| Peptide            | Uniq -10lgP | Mass  | Length    | ppm | m/z | z        | RT      | Fraction | Scan     | Source File               | Area F1  | Area F2 | Area F3 | Area F4 |
|--------------------|-------------|-------|-----------|-----|-----|----------|---------|----------|----------|---------------------------|----------|---------|---------|---------|
| R.AQIIDDAFNLAR.A   | N           | 93.46 | 1345.6990 | 12  | 0.6 | 673.8572 | 2 54.45 | 1        | F1:16660 | 12112021_RID_2349_DP1.raw | 1.3295E6 |         |         |         |
| K.ADNADVGFGSATR.A  | N           | 56.38 | 1279.5792 | 13  | 0.7 | 640.7974 | 2 31.66 | 1        | F1:9065  | 12112021_RID_2349_DP1.raw | 7.2844E4 |         |         |         |
| K.LVATTQMQAADAR.K  | Y           | 51.71 | 1374.6925 | 13  | 0.4 | 688.3538 | 2 31.31 | 1        | F1:8938  | 12112021_RID_2349_DP1.raw | 6.0941E4 |         |         |         |
| R.LMFDRSEVYGPMQK.Y | N           | 39.50 | 1699.8062 | 14  | 0.1 | 567.6094 | 3 44.88 | 1        | F1:13512 | 12112021_RID_2349_DP1.raw | 8.2001E4 |         |         |         |

total 4 peptides

XP\_034291427.1  
[back to list](#)

[Protein Coverage](#) | [Supporting Peptides](#) |  
Protein Coverage:

|     |            |             |            |            |            |            |            |            |  |  |  |  |  |  |
|-----|------------|-------------|------------|------------|------------|------------|------------|------------|--|--|--|--|--|--|
| 1   | MAKGFFISKS | LGIVGIVLGL  | GAVATIIALS | VVYTQEKQRA | DNALANQGGS | STITAGATIA | GTVQATTAGA | TRATTASTTR |  |  |  |  |  |  |
| 81  | ATTASTTRAT | TAGANSTITT  | KPLEPWDHMR | LPKTLMPTFY | TISLQPFKE  | VSPDFYIFKG | NSTVEFQCKQ | PTDLILIHKS |  |  |  |  |  |  |
| 161 | KLNYTLQETF | LASLTGINVV  | APAIERTWL  | EKTEYLVVKL | KEKLQQDKAY | RLHAEFTGEL | ADDLAGFYRS | AYMEEGKSKL |  |  |  |  |  |  |
| 241 | VATTQMQAAD | ARKAFPCFDE  | PAMKANFSIT | LIHLPAYKAL | SNMPINKTEE | VAMSDGSIWT | RTEFEPTLKM | STYLLAFIVS |  |  |  |  |  |  |
| 321 | EFENVSAIQH | NTLIQIWGRP  | KSIKEGQGDY | ALNVSWPILS | FFEQQYNVPY | PLKRLDQVAL | PDFNAGAMEN | WGLITYRESA |  |  |  |  |  |  |
| 401 | LLFDPEFSSI | GNKERIVTVI  | AHEVAHQWFG | NLVTLEWVNE | LWLNEGFASY | VEYLGANEAE | PTWNIKDLIV | PNDVYRVMAI |  |  |  |  |  |  |
| 481 | DALASSHPLS | SPAEIEINTPA | QISEVFDSIS | YSKGASVIRM | LSEFLTEPVF | REGLQSYFET | YQYENTVCDD | LWKQLQLVNV |  |  |  |  |  |  |
| 561 | KKNMSLPDVT | KTIMDRWTLQ  | MGFPVLTNT  | TTGIITQKHF | LLDPESPVER | PSQFNWTWIV | PVSWLSKGKE | AEMYWLTDTS |  |  |  |  |  |  |
| 641 | AENANFSTSA | NPAQWLLLN   | NVVGYFRVNY | DLENWERLMN | QLNDDLQKIP | VLNR       | AQIIDD     | AFNLARAKHV |  |  |  |  |  |  |
| 721 | YLAKEREYLP | WDTALDNLDY  | FR         | LMFDRSEV   | YGPMQKYIQK | QVTPLFDHFK | KITLNWTQIP | DGLMDQYNQI |  |  |  |  |  |  |
| 801 | IPECNELASS | WFKAWKANPS  | INRIPPNLRS | AIYCSAIRTG | GVEAWDFAWQ | MFQQAQVISE | ADKLRGALTC | SQTPWILQRY |  |  |  |  |  |  |
| 881 | LQYTLNSTLI | RRQDATSTIN  | SIASNVVGQP | LAWDFVRMNW | RTLQFQFGGS | SFSFSSLIQS | VTQRFASPF  | LQQLEQFKAD |  |  |  |  |  |  |
| 961 | NADVGFGSAT | RALEQALERT  | KANIKWVAEN | QPLVLQWFKE | NS         |            |            |            |  |  |  |  |  |  |

Supporting Peptides:

| Peptide            | Uniq | -10lgP | Mass      | Length | ppm | m/z      | z | RT    | Fraction | Scan     | Source File               | Area F1  | Area F2 | Area F3 | Area F4 |
|--------------------|------|--------|-----------|--------|-----|----------|---|-------|----------|----------|---------------------------|----------|---------|---------|---------|
| R.AQIIDDAFNLAR.A   | N    | 93.46  | 1345.6990 | 12     | 0.6 | 673.8572 | 2 | 54.45 | 1        | F1:16660 | 12112021_RID_2349_DP1.raw | 1.3295E6 |         |         |         |
| K.ADNADVGFGSATR.A  | N    | 56.38  | 1279.5792 | 13     | 0.7 | 640.7974 | 2 | 31.66 | 1        | F1:9065  | 12112021_RID_2349_DP1.raw | 7.2844E4 |         |         |         |
| K.LVATTQMQAADAR.K  | Y    | 51.71  | 1374.6925 | 13     | 0.4 | 688.3538 | 2 | 31.31 | 1        | F1:8938  | 12112021_RID_2349_DP1.raw | 6.0941E4 |         |         |         |
| R.LMFDRSEVYGPMQK.Y | N    | 39.50  | 1699.8062 | 14     | 0.1 | 567.6094 | 3 | 44.88 | 1        | F1:13512 | 12112021_RID_2349_DP1.raw | 8.2001E4 |         |         |         |
| total 4 peptides   |      |        |           |        |     |          |   |       |          |          |                           |          |         |         |         |

XP\_034291428.1  
[back to list](#)

| [Protein Coverage](#) | [Supporting Peptides](#) |  
Protein Coverage:

|     |            |            |            |            |            |            |            |            |            |            |  |  |  |  |  |  |
|-----|------------|------------|------------|------------|------------|------------|------------|------------|------------|------------|--|--|--|--|--|--|
| 1   | MAKGFFISK  | LGIVGIVLGL | GAVATIIALS | VVYTQEKQRA | DNALANQGPS | STITAGATIA | GTVQATTAGA | TRATTASTTR |            |            |  |  |  |  |  |  |
| 81  | ATTASTTRAT | TAGANSTITT | KPLEPWDHMR | LPKTLMPTFY | TISLQPFKE  | VSPDFYIFKG | NSTVEFQCKQ | PTDLILIHKS |            |            |  |  |  |  |  |  |
| 161 | KLNYTLQETF | LASLTGINVV | APAIERTWLW | EKTEYLVVKL | KEKLQQDKAY | RLHAEFTGEL | ADDLAGFYRS | AYMEEGKSKL |            |            |  |  |  |  |  |  |
| 241 | VATTQMQAAD | ARKAFPCFDE | PAMKANFSIT | LIHLPAYKAL | SNMPINKTEE | VAMSDGSIWT | RTEFEPTLKM | STYLLAFIVS |            |            |  |  |  |  |  |  |
| 321 | EFENVSAIQH | NTLIQIWGRP | KSIKEQGQDY | ALNVSWPILS | FFEQQYNVPY | PLKRLDQVAL | PDFNAGAMEN | WGLITYRESA |            |            |  |  |  |  |  |  |
| 401 | LLFDPEFSSI | GNKERIVTVI | AHEVAHQWFG | NLVTLEWNE  | LWLNEGFASY | VEYLGANEAE | PTWNIKDLIV | PNDVYRVMAI |            |            |  |  |  |  |  |  |
| 481 | DALASSHPLS | SPAEEINTPA | QISEVFDNIS | YSKGASVIRM | LSEFLTEPVF | REGLQSYFET | YQYENTVCDD | LWKQLQLVNV |            |            |  |  |  |  |  |  |
| 561 | KKNMSLPDTV | KTIMDRWTLQ | MGFPVLTVNT | TTGIITQKHF | LLDPESPVER | PSQFNWTWIV | PVSWLSKGKE | AEMYWLTDTS |            |            |  |  |  |  |  |  |
| 641 | AENANFSTSA | NPAQWLLNI  | NVVGYFRVNY | DLENWERLMN | QLNDDLQKIP | VLNRAQIIDD | AFNLARAKHV | GSDLALNTRT |            |            |  |  |  |  |  |  |
| 721 | YLAKEREYLP | WDTALDNLDY | FR         | LMFDRSEV   | YGPMQK     | YIYQK      | QVTPLFDHFK | KITLNWTQIP | DGLMDQYNQI | LAIRTACSYG |  |  |  |  |  |  |
| 801 | IPECNELASS | WFKAWKANPS | INRIPPNLRS | AIYCSAIRTG | GVEAWDFAWQ | MFQQAQVISE | ADKLRGALTC | SQTPWILQRY |            |            |  |  |  |  |  |  |
| 881 | LQYTLNSTLI | RRQDATSTIN | SIASNVVGQP | LAWDFVRMNW | RTLQFQFGGS | SFSFSSLIQS | VTQRFASPF  | LQQLEQFKAD |            |            |  |  |  |  |  |  |
| 961 | NADVGFGSAT | RALEQALERT | KANIKWAEN  | QPLVLQWFKE | NS         |            |            |            |            |            |  |  |  |  |  |  |

Supporting Peptides:

| Peptide            | Uniq | -10lgP | Mass      | Length | ppm | m/z      | z | RT    | Fraction | Scan     | Source File               | Area F1  | Area F2 | Area F3 | Area F4 |
|--------------------|------|--------|-----------|--------|-----|----------|---|-------|----------|----------|---------------------------|----------|---------|---------|---------|
| R.AQIIDDAFNLAR.A   | N    | 93.46  | 1345.6990 | 12     | 0.6 | 673.8572 | 2 | 54.45 | 1        | F1:16660 | 12112021_RID_2349_DP1.raw | 1.3295E6 |         |         |         |
| K.ADNADVGFGSATR.A  | N    | 56.38  | 1279.5792 | 13     | 0.7 | 640.7974 | 2 | 31.66 | 1        | F1:9065  | 12112021_RID_2349_DP1.raw | 7.2844E4 |         |         |         |
| K.LVATTQMQAADAR.K  | Y    | 51.71  | 1374.6925 | 13     | 0.4 | 688.3538 | 2 | 31.31 | 1        | F1:8938  | 12112021_RID_2349_DP1.raw | 6.0941E4 |         |         |         |
| R.LMFDRSEVYGPMQK.Y | N    | 39.50  | 1699.8062 | 14     | 0.1 | 567.6094 | 3 | 44.88 | 1        | F1:13512 | 12112021_RID_2349_DP1.raw | 8.2001E4 |         |         |         |
| total 4 peptides   |      |        |           |        |     |          |   |       |          |          |                           |          |         |         |         |

TRINITY\_DN743  
[back to list](#)

| [Protein Coverage](#) | [Supporting Peptides](#) |  
Protein Coverage:

|     |            |            |            |            |            |            |            |            |       |       |            |            |  |  |  |  |
|-----|------------|------------|------------|------------|------------|------------|------------|------------|-------|-------|------------|------------|--|--|--|--|
| 1   | VASEQSCYLW | RLKDSSLCRE | GRKTMGRSIS | VSFGLLVVFL | SPSGAKGSTC | PFNWLPYGL  | CYKVFNEPKT | WDDAEMFCRK |       |       |            |            |  |  |  |  |
| 81  | YKPGCHLASL | HSK        | GDSTFEA    | EYIADYRK   | GW         | GNIWIGLWGK | KK         | GFSWEWTD   | GSSTK | YLPWK | KNQPNHYLNK | EFCAEIVYFT |  |  |  |  |
| 161 | GYRLWNDQDC | KVKNAFLCQC | RF         |            |            |            |            |            |       |       |            |            |  |  |  |  |

Supporting Peptides:

| Peptide             | Uniq | -10lgP | Mass      | Length | ppm | m/z      | z | RT    | Fraction | Scan     | Source File               | Area F1 | Area F2 | Area F3 | Area F4 | Area F5 |
|---------------------|------|--------|-----------|--------|-----|----------|---|-------|----------|----------|---------------------------|---------|---------|---------|---------|---------|
| K.GDSTFEAEYIADYRK.G | Y    | 82.76  | 1763.8002 | 15     | 0.8 | 882.9081 | 2 | 48.40 | 7        | F7:14317 | 17112021_RID_2349_DP7.raw |         |         |         |         |         |
| K.GFSWEWTDGSSTK.Y   | Y    | 80.18  | 1486.6365 | 13     | 0.1 | 744.3256 | 2 | 52.71 | 7        | F7:15715 | 17112021_RID_2349_DP7.raw |         |         |         |         |         |
| K.GDSTFEAEYIADYR.K  | Y    | 77.07  | 1635.7052 | 14     | 0.6 | 818.8604 | 2 | 55.01 | 7        | F7:16481 | 17112021_RID_2349_DP7.raw |         |         |         |         |         |
| total 3 peptides    |      |        |           |        |     |          |   |       |          |          |                           |         |         |         |         |         |

TRINITY\_DN743  
[back to list](#)

| [Protein Coverage](#) | [Supporting Peptides](#) |  
Protein Coverage:

|    |            |            |            |            |            |    |          |         |     |            |   |           |  |  |  |  |
|----|------------|------------|------------|------------|------------|----|----------|---------|-----|------------|---|-----------|--|--|--|--|
| 1  | THTHTHTRFF | SAGQMPFFVT | AVSQMFCRK  | Y          | KPGCHLASLH | SK | GDSTFEAE | YIADYRK | GWG | NIWIGLWGKK | K | GFSWEWTDG |  |  |  |  |
| 81 | SSTK       | YLPWKK     | NQPNHYLNKE | FCAEIVYFTA | TSNFGEEMVG |    |          |         |     |            |   |           |  |  |  |  |

Supporting Peptides:

| Peptide             | Uniq | -10lgP | Mass      | Length | ppm | m/z      | z | RT    | Fraction | Scan | Source File                        | Area F1 | Area F2 | Area F3 | Area F4 | Area F5 |
|---------------------|------|--------|-----------|--------|-----|----------|---|-------|----------|------|------------------------------------|---------|---------|---------|---------|---------|
| K.GDSTFEAEYIADYRK.G | Y    | 82.76  | 1763.8002 | 15     | 0.8 | 882.9081 | 2 | 48.40 | 7        |      | F7:14317 17112021_RID_2349_DP7.raw |         |         |         |         |         |
| K.GFSWEWTDGSSTK.Y   | Y    | 80.18  | 1486.6365 | 13     | 0.1 | 744.3256 | 2 | 52.71 | 7        |      | F7:15715 17112021_RID_2349_DP7.raw |         |         |         |         |         |
| K.GDSTFEAEYIADYR.K  | Y    | 77.07  | 1635.7052 | 14     | 0.6 | 818.8604 | 2 | 55.01 | 7        |      | F7:16481 17112021_RID_2349_DP7.raw |         |         |         |         |         |

total 3 peptides

TRINITY\_DN0

[back to list](#)

| [Protein Coverage](#) | [Supporting Peptides](#) |

Protein Coverage:

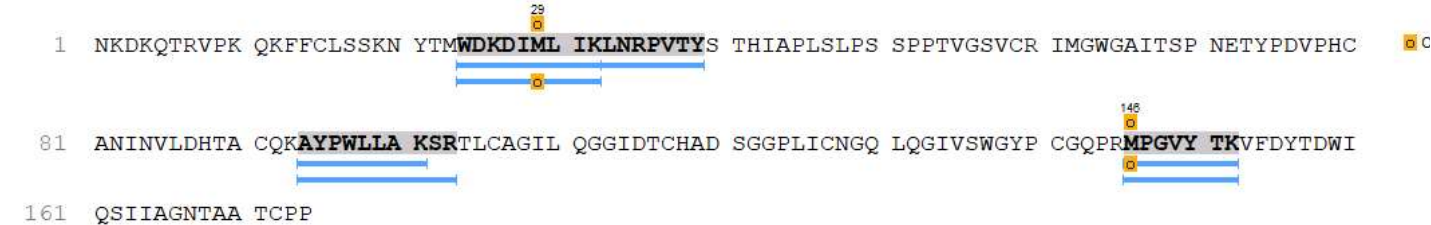

Supporting Peptides:

| Peptide               | Uniq | -10lgP | Mass      | Length | ppm  | m/z      | z | RT    | Fraction | Scan | Source File                        | Area F1  | Area F2  | Area F3 | Area F4 | Area F5 |
|-----------------------|------|--------|-----------|--------|------|----------|---|-------|----------|------|------------------------------------|----------|----------|---------|---------|---------|
| M.WDKDIMLIK.L         | N    | 57.12  | 1160.6263 | 9      | -0.1 | 581.3204 | 2 | 46.64 | 2        |      | F2:13338 12112021_RID_2349_DP2.raw | 2.1169E5 | 9.915E6  | 1.5104  |         |         |
| K.AYPWLLAKSR.T        | Y    | 56.89  | 1203.6764 | 10     | -0.7 | 602.8450 | 2 | 44.38 | 4        |      | F4:12697 17112021_RID_2349_DP4.raw |          |          |         |         |         |
| R.MPGVYTK.V           | N    | 56.65  | 794.3997  | 7      | 0.2  | 398.2072 | 2 | 26.42 | 4        |      | F4:6530 17112021_RID_2349_DP4.raw  | 1.5867E7 | 1.6435E6 | 9.2719  |         |         |
| K.AYPWLLAK.S          | Y    | 56.25  | 960.5433  | 8      | -0.5 | 481.2787 | 2 | 51.66 | 4        |      | F4:15033 17112021_RID_2349_DP4.raw | 6.4332E6 | 1.8506E6 | 1.3941  |         |         |
| M.WDKDIM(+15.99)LIK.L | N    | 52.20  | 1176.6212 | 9      | -0.2 | 589.3177 | 2 | 41.27 | 2        |      | F2:11445 12112021_RID_2349_DP2.raw |          | 6.6323E6 | 2.1157  |         |         |
| K.LNRPTY.S            | N    | 50.91  | 861.4708  | 7      | 0.0  | 431.7427 | 2 | 27.71 | 2        |      | F2:6756 12112021_RID_2349_DP2.raw  | 1.1931E5 | 4.6213E5 |         |         |         |
| R.M(+15.99)PGVYTK.V   | N    | 49.06  | 810.3946  | 7      | 1.2  | 811.4028 | 1 | 23.10 | 3        |      | F3:5226 17112021_RID_2349_DP3.raw  | 6.2476E6 | 4.4572E5 | 2.9093  |         |         |

total

TRINITY\_DN0

[back to list](#)

| [Protein Coverage](#) | [Supporting Peptides](#) |

Protein Coverage:

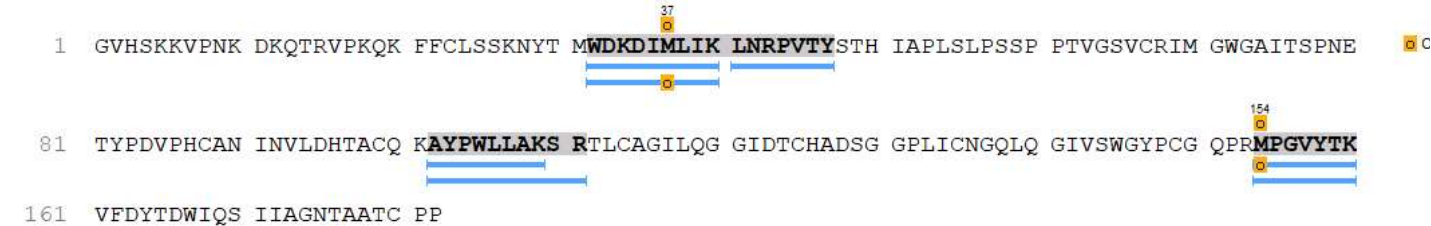

Supporting Peptides:

| Peptide               | Uniq | -10lgP | Mass      | Length | ppm  | m/z      | z | RT    | Fraction | Scan | Source File                        | Area F1  | Area F2  | Area F3 | Area F4 | Area F5 |
|-----------------------|------|--------|-----------|--------|------|----------|---|-------|----------|------|------------------------------------|----------|----------|---------|---------|---------|
| M.WDKDIMLIK.L         | N    | 57.12  | 1160.6263 | 9      | -0.1 | 581.3204 | 2 | 46.64 | 2        |      | F2:13338 12112021_RID_2349_DP2.raw | 2.1169E5 | 9.915E6  | 1.5104  |         |         |
| K.AYPWLLAKSR.T        | Y    | 56.89  | 1203.6764 | 10     | -0.7 | 602.8450 | 2 | 44.38 | 4        |      | F4:12697 17112021_RID_2349_DP4.raw |          |          |         |         |         |
| R.MPGVYTK.V           | N    | 56.65  | 794.3997  | 7      | 0.2  | 398.2072 | 2 | 26.42 | 4        |      | F4:6530 17112021_RID_2349_DP4.raw  | 1.5867E7 | 1.6435E6 | 9.2719  |         |         |
| K.AYPWLLAK.S          | Y    | 56.25  | 960.5433  | 8      | -0.5 | 481.2787 | 2 | 51.66 | 4        |      | F4:15033 17112021_RID_2349_DP4.raw | 6.4332E6 | 1.8506E6 | 1.3941  |         |         |
| M.WDKDIM(+15.99)LIK.L | N    | 52.20  | 1176.6212 | 9      | -0.2 | 589.3177 | 2 | 41.27 | 2        |      | F2:11445 12112021_RID_2349_DP2.raw |          | 6.6323E6 | 2.1157  |         |         |
| K.LNRPTY.S            | N    | 50.91  | 861.4708  | 7      | 0.0  | 431.7427 | 2 | 27.71 | 2        |      | F2:6756 12112021_RID_2349_DP2.raw  | 1.1931E5 | 4.6213E5 |         |         |         |
| R.M(+15.99)PGVYTK.V   | N    | 49.06  | 810.3946  | 7      | 1.2  | 811.4028 | 1 | 23.10 | 3        |      | F3:5226 17112021_RID_2349_DP3.raw  | 6.2476E6 | 4.4572E5 | 2.9093  |         |         |

total

CBM40646.1

[back to list](#)

| [Protein Coverage](#) | [Supporting Peptides](#) |

Protein Coverage:

1

VLIRVLANLL LLQLSYAQES SELVIGGDEC DINEHPFLVA LHTARSKRFH CAGTLLNKEW VLTAAARCDME NMQIYLGLHN

81

ISRPNQDQKR RVPKEKHFCV SSK**TYTRWDK DIMLIR**LKRP VNDGTHIAPL SLPSNPFSVG SVCR**IMGWGS ITTTKV**TYPD

161

**VPH**CANIKLF DYSVCRDAYK GLPEKSRTL CAGILEGGIDS CKVDNNGGLI CNGQFQGIGS WEGHPCAQPL KPALYTNVFE

241

YTDWIEGIIA RNTTVTCPP

Supporting Peptides:

| Peptide                   | Uniq | -10lgP | Mass      | Length | ppm  | m/z      | z | RT    | Fraction | Scan     | Source File               | Area F1  | Area F2  | Area F3 |
|---------------------------|------|--------|-----------|--------|------|----------|---|-------|----------|----------|---------------------------|----------|----------|---------|
| K.TYTRWDKDIMLIR.L         | N    | 82.41  | 1709.8923 | 13     | 0.4  | 570.9716 | 3 | 49.33 | 3        | F3:14370 | 17112021_RID_2349_DP3.raw | 1.4395E6 | 1.7394E7 |         |
| R.WDKDIMLIR.L             | N    | 59.98  | 1188.6324 | 9      | 0.8  | 595.3240 | 2 | 47.61 | 2        | F2:13483 | 12112021_RID_2349_DP2.raw | 2.0105E7 | 1.3706E8 |         |
| R.WDKDIM(+15.99)LIR.L     | N    | 54.14  | 1204.6274 | 9      | 0.6  | 603.3214 | 2 | 42.22 | 2        | F2:11819 | 12112021_RID_2349_DP2.raw | 1.4264E7 | 3.0085E7 |         |
| R.IM(+15.99)GWGSITTTK.V Y |      | 46.02  | 1209.6063 | 11     | -0.6 | 605.8101 | 2 | 67.06 | 3        | F3:20099 | 17112021_RID_2349_DP3.raw |          | 0        |         |
| W.DKDIMLIR.L              | N    | 44.22  | 1002.5532 | 8      | -0.5 | 502.2836 | 2 | 37.38 | 3        | F3:10341 | 17112021_RID_2349_DP3.raw |          | 5.8616E6 |         |
| W.DKDIM(+15.99)LIR.L      | N    | 39.37  | 1018.5481 | 8      | 0.3  | 510.2815 | 2 | 31.54 | 3        | F3:8358  | 17112021_RID_2349_DP3.raw |          | 1.7097E6 |         |
| K.VTYPDVP.HC              | N    | 39.33  | 926.4498  | 8      | -0.6 | 464.2319 | 2 | 35.54 | 6        | F6:9635  | 17112021_RID_2349_DP6.raw |          |          |         |

total 7 peptides

CBM40645.1  
[back to list](#)  
| [Protein Coverage](#) | [Supporting Peptides](#) |  
Protein Coverage:

1

VLIRVLANLL LLQLSYAQES SELVIGGDEC DINEHPFLVA LHTARSKRFH CAGTLLNKEW VLTAAARCDR NIRIKFGVHN

81

KNVQNEDEEM RVPKEKHFCV SSK**TYTRWDK DIMLIR**LKRP VNDGTHIAPL SLPSNPFSVG SVCR**IMGWGS ITTTKV**TYPD

161

**VPH**CANIKLF DYSVCRDAYK GLPEKSRTL CAGILEGGIDS CKVDNNGGLI CNGQFQGIGS WEGHPCAQPL KPALYTNVFE

241

YTDWIEGIIA RNTTVTCPP

Supporting Peptides:

| Peptide                   | Uniq | -10lgP | Mass      | Length | ppm  | m/z      | z | RT    | Fraction | Scan     | Source File               | Area F1  | Area F2  | Area F3 |
|---------------------------|------|--------|-----------|--------|------|----------|---|-------|----------|----------|---------------------------|----------|----------|---------|
| K.TYTRWDKDIMLIR.L         | N    | 82.41  | 1709.8923 | 13     | 0.4  | 570.9716 | 3 | 49.33 | 3        | F3:14370 | 17112021_RID_2349_DP3.raw | 1.4395E6 | 1.7394E7 |         |
| R.WDKDIMLIR.L             | N    | 59.98  | 1188.6324 | 9      | 0.8  | 595.3240 | 2 | 47.61 | 2        | F2:13483 | 12112021_RID_2349_DP2.raw | 2.0105E7 | 1.3706E8 |         |
| R.WDKDIM(+15.99)LIR.L     | N    | 54.14  | 1204.6274 | 9      | 0.6  | 603.3214 | 2 | 42.22 | 2        | F2:11819 | 12112021_RID_2349_DP2.raw | 1.4264E7 | 3.0085E7 |         |
| R.IM(+15.99)GWGSITTTK.V Y |      | 46.02  | 1209.6063 | 11     | -0.6 | 605.8101 | 2 | 67.06 | 3        | F3:20099 | 17112021_RID_2349_DP3.raw |          | 0        |         |
| W.DKDIMLIR.L              | N    | 44.22  | 1002.5532 | 8      | -0.5 | 502.2836 | 2 | 37.38 | 3        | F3:10341 | 17112021_RID_2349_DP3.raw |          | 5.8616E6 |         |
| W.DKDIM(+15.99)LIR.L      | N    | 39.37  | 1018.5481 | 8      | 0.3  | 510.2815 | 2 | 31.54 | 3        | F3:8358  | 17112021_RID_2349_DP3.raw |          | 1.7097E6 |         |
| K.VTYPDVP.HC              | N    | 39.33  | 926.4498  | 8      | -0.6 | 464.2319 | 2 | 35.54 | 6        | F6:9635  | 17112021_RID_2349_DP6.raw |          |          |         |

total 7 peptides

AAR24534.1  
[back to list](#)  
| [Protein Coverage](#) | [Supporting Peptides](#) |  
Protein Coverage:

1

MVLIRVLANL LLLQLSYAQE SSELVIGGDE CDINEHPFLV ALHTARSKRF HCAGTLLNKE WVLTAARCDR KNIRIKFGVH

81

NKNVQNEDEE MRVPKEKHFC VSSK**TYTRWDK DIMLIR**LKRP FVNDGTHIAP LSLPSNPFSV GSVCR**IMGWG SITTTKV**TYP

161

**DVPH**CANIKL FDYSVCRDAY KGLPEKSRTL CAGILEGGID SCKVDNNGGPL ICNGQFQGIG SWEGHPCAQP LKPALYTNVF

241

EYTDWIEGII ARNTTVTCPP

Supporting Peptides:

| Peptide                 | Uniq | -10lgP | Mass      | Length | ppm  | m/z      | z | RT    | Fraction | Scan     | Source File               | Area F1  | Area F2  | Area F3 |
|-------------------------|------|--------|-----------|--------|------|----------|---|-------|----------|----------|---------------------------|----------|----------|---------|
| K.TYTRWDKDIMLIR.L       | N    | 82.41  | 1709.8923 | 13     | 0.4  | 570.9716 | 3 | 49.33 | 3        | F3:14370 | 17112021_RID_2349_DP3.raw | 1.4395E6 | 1.7394E7 |         |
| R.WDKDIMLIR.L           | N    | 59.98  | 1188.6324 | 9      | 0.8  | 595.3240 | 2 | 47.61 | 2        | F2:13483 | 12112021_RID_2349_DP2.raw | 2.0105E7 | 1.3706E8 |         |
| R.WDKDIM(+15.99)LIR.L   | N    | 54.14  | 1204.6274 | 9      | 0.6  | 603.3214 | 2 | 42.22 | 2        | F2:11819 | 12112021_RID_2349_DP2.raw | 1.4264E7 | 3.0085E7 |         |
| R.IM(+15.99)GWGSITTTK.V | Y    | 46.02  | 1209.6063 | 11     | -0.6 | 605.8101 | 2 | 67.06 | 3        | F3:20099 | 17112021_RID_2349_DP3.raw |          | 0        |         |
| W.DKDIMLIR.L            | N    | 44.22  | 1002.5532 | 8      | -0.5 | 502.2836 | 2 | 37.38 | 3        | F3:10341 | 17112021_RID_2349_DP3.raw |          | 5.8616E6 |         |
| W.DKDIM(+15.99)LIR.L    | N    | 39.37  | 1018.5481 | 8      | 0.3  | 510.2815 | 2 | 31.54 | 3        | F3:8358  | 17112021_RID_2349_DP3.raw |          | 1.7097E6 |         |
| K.VTYPDVPH.C            | N    | 39.33  | 926.4498  | 8      | -0.6 | 464.2319 | 2 | 35.54 | 6        | F6:9635  | 17112021_RID_2349_DP6.raw |          |          |         |
| total 7 peptides        |      |        |           |        |      |          |   |       |          |          |                           |          |          |         |

Q6T6S7.1  
[back to list](#)

[Protein Coverage](#) | [Supporting Peptides](#) |  
Protein Coverage:

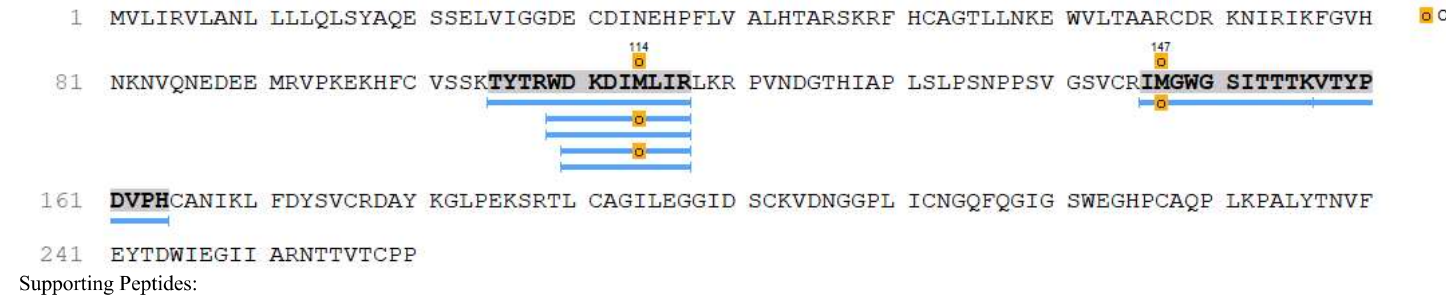

Supporting Peptides:

| Peptide                 | Uniq | -10lgP | Mass      | Length | ppm  | m/z      | z | RT    | Fraction | Scan     | Source File               | Area F1  | Area F2  | Area F3 |
|-------------------------|------|--------|-----------|--------|------|----------|---|-------|----------|----------|---------------------------|----------|----------|---------|
| K.TYTRWDKDIMLIR.L       | N    | 82.41  | 1709.8923 | 13     | 0.4  | 570.9716 | 3 | 49.33 | 3        | F3:14370 | 17112021_RID_2349_DP3.raw | 1.4395E6 | 1.7394E7 |         |
| R.WDKDIMLIR.L           | N    | 59.98  | 1188.6324 | 9      | 0.8  | 595.3240 | 2 | 47.61 | 2        | F2:13483 | 12112021_RID_2349_DP2.raw | 2.0105E7 | 1.3706E8 |         |
| R.WDKDIM(+15.99)LIR.L   | N    | 54.14  | 1204.6274 | 9      | 0.6  | 603.3214 | 2 | 42.22 | 2        | F2:11819 | 12112021_RID_2349_DP2.raw | 1.4264E7 | 3.0085E7 |         |
| R.IM(+15.99)GWGSITTTK.V | Y    | 46.02  | 1209.6063 | 11     | -0.6 | 605.8101 | 2 | 67.06 | 3        | F3:20099 | 17112021_RID_2349_DP3.raw |          | 0        |         |
| W.DKDIMLIR.L            | N    | 44.22  | 1002.5532 | 8      | -0.5 | 502.2836 | 2 | 37.38 | 3        | F3:10341 | 17112021_RID_2349_DP3.raw |          | 5.8616E6 |         |
| W.DKDIM(+15.99)LIR.L    | N    | 39.37  | 1018.5481 | 8      | 0.3  | 510.2815 | 2 | 31.54 | 3        | F3:8358  | 17112021_RID_2349_DP3.raw |          | 1.7097E6 |         |
| K.VTYPDVPH.C            | N    | 39.33  | 926.4498  | 8      | -0.6 | 464.2319 | 2 | 35.54 | 6        | F6:9635  | 17112021_RID_2349_DP6.raw |          |          |         |
| total 7 peptides        |      |        |           |        |      |          |   |       |          |          |                           |          |          |         |

TRINITY\_DN94  
[back to list](#)

[Protein Coverage](#) | [Supporting Peptides](#) |  
Protein Coverage:

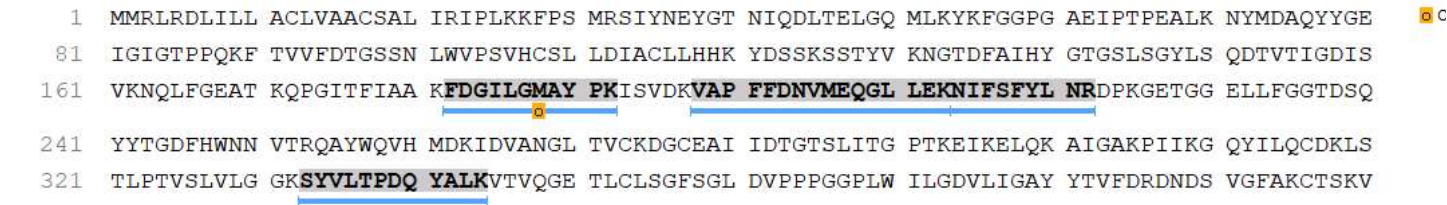

Supporting Peptides:

| Peptide                 | Uniq | -10lgP | Mass      | Length | ppm | m/z      | z | RT    | Fraction | Scan     | Source File               | Area F1  | Area F2 | Area F3 | Area F4 |
|-------------------------|------|--------|-----------|--------|-----|----------|---|-------|----------|----------|---------------------------|----------|---------|---------|---------|
| K.SYVLTPDQYALK.V        | Y    | 68.30  | 1396.7238 | 12     | 0.7 | 699.3696 | 2 | 47.84 | 2        | F2:13587 | 12112021_RID_2349_DP2.raw | 3.5687E5 |         |         |         |
| K.VAPFFDNVMEQGLLEK.N    | Y    | 60.45  | 1835.9127 | 16     | 0.0 | 918.9636 | 2 | 64.86 | 2        | F2:19175 | 12112021_RID_2349_DP2.raw | 3.9332E5 |         |         |         |
| K.FDGILGM(+15.99)AYPK.I | Y    | 49.32  | 1226.6005 | 11     | 0.6 | 614.3079 | 2 | 55.72 | 2        | F2:16218 | 12112021_RID_2349_DP2.raw | 5.4166E4 |         |         |         |
| K.NIFS FYLNR.D          | Y    | 46.37  | 1172.5978 | 9      | 2.2 | 587.3074 | 2 | 59.79 | 2        | F2:17511 | 12112021_RID_2349_DP2.raw | 0        |         |         |         |
| total 4 peptides        |      |        |           |        |     |          |   |       |          |          |                           |          |         |         |         |

E5AJX2.1  
[back to list](#)

[Protein Coverage](#) | [Supporting Peptides](#) |

Protein Coverage:

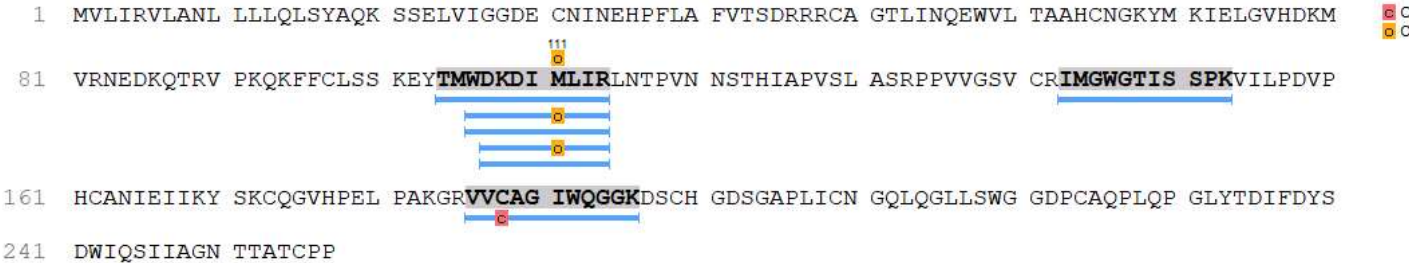

Supporting Peptides:

| Peptide                 | Uniq | -10lgP | Mass      | Length | ppm  | m/z      | z | RT    | Fraction | Scan     | Source File               | Area F1  | Area F2 | Area F3 |
|-------------------------|------|--------|-----------|--------|------|----------|---|-------|----------|----------|---------------------------|----------|---------|---------|
| M.WDKDIMLIR.L           | N    | 59.98  | 1188.6324 | 9      | 0.8  | 595.3240 | 2 | 47.61 | 2        | F2:13483 | 12112021_RID_2349_DP2.raw | 2.0105E7 | 1.3706  |         |
| M.WDKDIM(+15.99)LIR.L   | N    | 54.14  | 1204.6274 | 9      | 0.6  | 603.3214 | 2 | 42.22 | 2        | F2:11819 | 12112021_RID_2349_DP2.raw | 1.4264E7 | 3.0085  |         |
| Y.TMWDKDIMLIR.L         | N    | 50.40  | 1420.7207 | 11     | 0.6  | 711.3680 | 2 | 53.82 | 3        | F3:15851 | 17112021_RID_2349_DP3.raw |          | 1.1002  |         |
| R.IMGWGTTISPK.V         | Y    | 46.07  | 1175.6008 | 11     | 0.7  | 588.8081 | 2 | 66.82 | 3        | F3:20035 | 17112021_RID_2349_DP3.raw |          | 5.4903  |         |
| W.DKDIMLIR.L            | N    | 44.22  | 1002.5532 | 8      | -0.5 | 502.2836 | 2 | 37.38 | 3        | F3:10341 | 17112021_RID_2349_DP3.raw |          | 5.8616  |         |
| W.DKDIM(+15.99)LIR.L    | N    | 39.37  | 1018.5481 | 8      | 0.3  | 510.2815 | 2 | 31.54 | 3        | F3:8358  | 17112021_RID_2349_DP3.raw |          | 1.7097  |         |
| R.VVC(+57.02)AGIWQGGK.D | N    | 39.18  | 1173.5964 | 11     | 0.7  | 587.8059 | 2 | 34.83 | 4        | F4:9494  | 17112021_RID_2349_DP4.raw |          |         |         |

CBW30778.1

[back to list](#)

[Protein Coverage](#) | [Supporting Peptides](#) |

Protein Coverage:

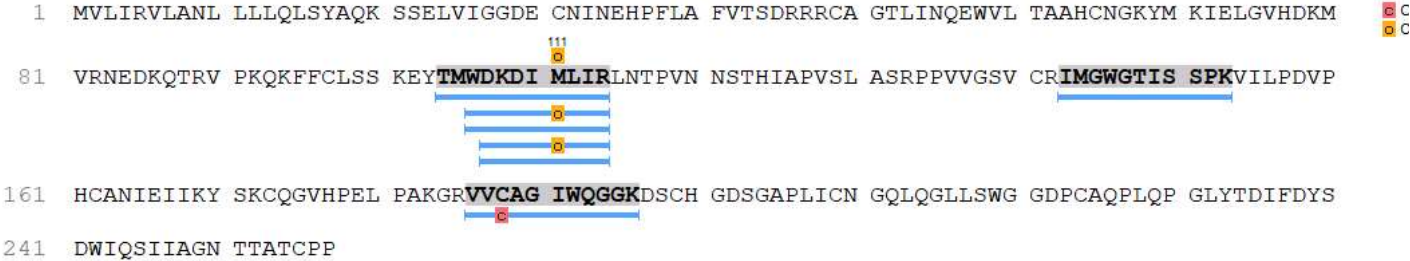

Supporting Peptides:

| Peptide                 | Uniq | -10lgP | Mass      | Length | ppm  | m/z      | z | RT    | Fraction | Scan     | Source File               | Area F1  | Area F2 | Area F3 |
|-------------------------|------|--------|-----------|--------|------|----------|---|-------|----------|----------|---------------------------|----------|---------|---------|
| M.WDKDIMLIR.L           | N    | 59.98  | 1188.6324 | 9      | 0.8  | 595.3240 | 2 | 47.61 | 2        | F2:13483 | 12112021_RID_2349_DP2.raw | 2.0105E7 | 1.3706  |         |
| M.WDKDIM(+15.99)LIR.L   | N    | 54.14  | 1204.6274 | 9      | 0.6  | 603.3214 | 2 | 42.22 | 2        | F2:11819 | 12112021_RID_2349_DP2.raw | 1.4264E7 | 3.0085  |         |
| Y.TMWDKDIMLIR.L         | N    | 50.40  | 1420.7207 | 11     | 0.6  | 711.3680 | 2 | 53.82 | 3        | F3:15851 | 17112021_RID_2349_DP3.raw |          | 1.1002  |         |
| R.IMGWGTTISPK.V         | Y    | 46.07  | 1175.6008 | 11     | 0.7  | 588.8081 | 2 | 66.82 | 3        | F3:20035 | 17112021_RID_2349_DP3.raw |          | 5.4903  |         |
| W.DKDIMLIR.L            | N    | 44.22  | 1002.5532 | 8      | -0.5 | 502.2836 | 2 | 37.38 | 3        | F3:10341 | 17112021_RID_2349_DP3.raw |          | 5.8616  |         |
| W.DKDIM(+15.99)LIR.L    | N    | 39.37  | 1018.5481 | 8      | 0.3  | 510.2815 | 2 | 31.54 | 3        | F3:8358  | 17112021_RID_2349_DP3.raw |          | 1.7097  |         |
| R.VVC(+57.02)AGIWQGGK.D | N    | 39.18  | 1173.5964 | 11     | 0.7  | 587.8059 | 2 | 34.83 | 4        | F4:9494  | 17112021_RID_2349_DP4.raw |          |         |         |

TRINITY\_DN4675

[back to list](#)

[Protein Coverage](#) | [Supporting Peptides](#) |

Protein Coverage:

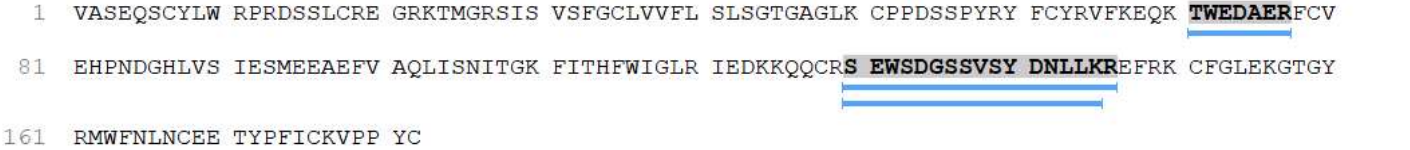

Supporting Peptides:

| Peptide      | Uniq | -10lgP | Mass      | Length | ppm | m/z      | z | RT    | Fraction | Scan     | Source File               | Area F1 | Area F2 | Area F3 | Area F4 |
|--------------|------|--------|-----------|--------|-----|----------|---|-------|----------|----------|---------------------------|---------|---------|---------|---------|
| R.SEWSDGSSVS | Y    | 83.22  | 1785.8057 | 16     | 0.7 | 893.9108 | 2 | 51.99 | 5        | F5:15311 | 17112021_RID_2349_DP5.raw |         |         |         |         |

total 3 peptides

| Peptide               | Uniq | -10lgP | Mass      | Length | ppm | m/z      | z | RT    | Fraction | Scan     | Source                    | File | Area F1 | Area F2 | Area F3 | Area F4 |
|-----------------------|------|--------|-----------|--------|-----|----------|---|-------|----------|----------|---------------------------|------|---------|---------|---------|---------|
| R.SEWSDGSSVSYDNLKLR.E | Y    | 79.37  | 1941.9067 | 17     | 0.4 | 971.9610 | 2 | 46.71 | 5        | F5:13597 | 17112021_RID_2349_DP5.raw |      |         |         |         |         |
| K.TWEDAER.F           | N    | 42.62  | 905.3879  | 7      | 0.3 | 453.7014 | 2 | 24.88 | 5        | F5:6121  | 17112021_RID_2349_DP5.raw |      |         |         |         |         |

total 3 peptides

TRINITY\_DN59  
[back to list](#)

| [Protein Coverage](#) | [Supporting Peptides](#) |

Protein Coverage:

1GWSAYDQHCYQAVDEPKTWA DAEKFCTEQA NGGHLVSIEN VGEANFVAQL ASGFIQKPGI YVWIGLRDRR KEQQCRSEWN

81DGSKI IYVNW KEGESKMCQG LAKWTD FHKW DYVNCAERYR FVCKFPPQC

Supporting Peptides:

| Peptide           | Uniq -10lgP | Mass      | Length   | ppm | m/z      | z        | RT    | Fraction | Scan     | Source File               | Area F1                   | Area F2 | Area F3 | Area F4 | Area F  |
|-------------------|-------------|-----------|----------|-----|----------|----------|-------|----------|----------|---------------------------|---------------------------|---------|---------|---------|---------|
| K.IYVNWKEGESK.M Y | 79.43       | 1464.7612 | 12       | 0.4 | 733.3882 | 2        | 38.97 | 5        | F5:10919 | 17112021_RID_2349_DP5.raw |                           |         |         |         | 2.829E7 |
| C.YQAVDEPK.T      | N           | 56.88     | 948.4552 | 8   | 0.4      | 475.2351 | 2     | 22.42    | 5        | F5:5214                   | 17112021_RID_2349_DP5.raw |         |         |         | 4.8543E |
| K.TWADAEKF.C      | N           | 39.07     | 966.4446 | 8   | 0.5      | 484.2298 | 2     | 41.22    | 5        | F5:11753                  | 17112021_RID_2349_DP5.raw |         |         |         | 2.1565E |

total 3 peptides

TRINITY\_DN59  
[back to list](#)

| [Protein Coverage](#) | [Supporting Peptides](#) |

Protein Coverage:

1GWSAYDQHCYQAVDEPKTWA DAEKFCTEQA NGGHLVSIEN VGEANFVAQL ASGFIQKPGI YVWIGLRDRR KEQQCRSEWN

81DGSKI IYVNW KEGESKMCQG LAKWTD FHKW DYVNCAERYR FVCKFPPQC

Supporting Peptides:

| Peptide           | Uniq -10lgP | Mass      | Length   | ppm | m/z      | z        | RT    | Fraction | Scan     | Source File               | Area F1                   | Area F2 | Area F3 | Area F4 | Area F  |
|-------------------|-------------|-----------|----------|-----|----------|----------|-------|----------|----------|---------------------------|---------------------------|---------|---------|---------|---------|
| K.IYVNWKEGESK.M Y | 79.43       | 1464.7612 | 12       | 0.4 | 733.3882 | 2        | 38.97 | 5        | F5:10919 | 17112021_RID_2349_DP5.raw |                           |         |         |         | 2.829E7 |
| C.YQAVDEPK.T      | N           | 56.88     | 948.4552 | 8   | 0.4      | 475.2351 | 2     | 22.42    | 5        | F5:5214                   | 17112021_RID_2349_DP5.raw |         |         |         | 4.8543E |
| K.TWADAEKF.C      | N           | 39.07     | 966.4446 | 8   | 0.5      | 484.2298 | 2     | 41.22    | 5        | F5:11753                  | 17112021_RID_2349_DP5.raw |         |         |         | 2.1565E |

total 3 peptides

AJO70724.1  
[back to list](#)

| [Protein Coverage](#) | [Supporting Peptides](#) |

Protein Coverage:

1MGRFISVSFG LLVFLSLSG TGADFD CPSG WSA YDQHCYQAVDEPKTWAD AEKFCTEQAN GGHLVSIENV GEANFVAQLA

81SGFIQKPGIY VWIGLRDRRK EQQCRSEWND GSK IYVNWK EGESKMCQGL AKWTD FHKWD YVNCAERYR FVCKFPPQC

Supporting Peptides:

| Peptide           | Uniq -10lgP | Mass      | Length   | ppm | m/z      | z        | RT    | Fraction | Scan     | Source File               | Area F1                   | Area F2 | Area F3 | Area F4 | Area F  |
|-------------------|-------------|-----------|----------|-----|----------|----------|-------|----------|----------|---------------------------|---------------------------|---------|---------|---------|---------|
| K.IYVNWKEGESK.M Y | 79.43       | 1464.7612 | 12       | 0.4 | 733.3882 | 2        | 38.97 | 5        | F5:10919 | 17112021_RID_2349_DP5.raw |                           |         |         |         | 2.829E7 |
| C.YQAVDEPK.T      | N           | 56.88     | 948.4552 | 8   | 0.4      | 475.2351 | 2     | 22.42    | 5        | F5:5214                   | 17112021_RID_2349_DP5.raw |         |         |         | 4.8543E |
| K.TWADAEKF.C      | N           | 39.07     | 966.4446 | 8   | 0.5      | 484.2298 | 2     | 41.22    | 5        | F5:11753                  | 17112021_RID_2349_DP5.raw |         |         |         | 2.1565E |

total 3 peptides

TRINITY\_DN588  
[back to list](#)

| [Protein Coverage](#) | [Supporting Peptides](#) |

Protein Coverage:

1MAAYLLAVAI LFCIQGWPSG TVQGQVRPFL DVYQRSACQA RETLVSILQE YPDEISDIFR PSCVAVLRCS GCCTDESLKC

81TPVGKHTVDM QIMRVNPR TQSSKMEVMKFT EHTACECRPR RKQGE PDGPK EKPRRGGVRA KFFPDQLLTP GAL

Supporting Peptides:

| Peptide                       | Uniq | -10lgP | Mass      | Length | ppm  | m/z      | z | RT    | Fraction | Scan     | Source File               | Area F1  | Area F  |
|-------------------------------|------|--------|-----------|--------|------|----------|---|-------|----------|----------|---------------------------|----------|---------|
| K.HTVDMQIMR.V                 | N    | 70.60  | 1129.5372 | 9      | -0.2 | 565.7758 | 2 | 32.19 | 7        | F7:8643  | 17112021_RID_2349_DP7.raw | 1.1569E6 | 7.4694E |
| K.HTVDMQIM(+15.99)R.V         | N    | 68.64  | 1145.5321 | 9      | 1.0  | 573.7739 | 2 | 24.76 | 7        | F7:6460  | 17112021_RID_2349_DP7.raw | 5.9884E5 | 4.6869E |
| K.HTVDM(+15.99)QIM(+15.99)R.V | N    | 62.07  | 1161.5271 | 9      | 0.3  | 581.7710 | 2 | 18.23 | 7        | F7:3828  | 17112021_RID_2349_DP7.raw | 7.9377E4 | 3.9021E |
| K.HTVDM(+15.99)QIMR.V         | N    | 58.98  | 1145.5321 | 9      | 0.3  | 573.7735 | 2 | 23.27 | 7        | F7:5513  | 17112021_RID_2349_DP7.raw | 7.1174E5 |         |
| Q.GQVRPFLDVYQR.S              | Y    | 55.17  | 1476.7837 | 12     | -0.3 | 493.2684 | 3 | 42.18 | 7        | F7:12014 | 17112021_RID_2349_DP7.raw |          |         |
| R.PFLDVYQR.S                  | N    | 49.73  | 1036.5342 | 8      | -0.1 | 519.2743 | 2 | 44.38 | 7        | F7:12800 | 17112021_RID_2349_DP7.raw |          |         |
| V.RPFLDVYQR.S                 | N    | 45.90  | 1192.6353 | 9      | 1.7  | 597.3259 | 2 | 38.63 | 7        | F7:10909 | 17112021_RID_2349_DP7.raw |          |         |
| R.TQSSKMEVMK.F                | N    | 45.83  | 1167.5627 | 10     | -0.2 | 584.7885 | 2 | 20.39 | 1        | F1:5202  | 12112021_RID_2349_DP1.raw | 1.9831E5 |         |

TRINITY\_DN588  
[back to list](#)

| [Protein Coverage](#) | [Supporting Peptides](#) |

Protein Coverage:

1

MAAYLLAVAI LFCIQGWPSG TVQ**GQVRPFL DVYQR**SACQA RETLVSILQE YPDEISDIFR PSCVAVLRCs GCCTDESLKC

81

TPVGK**HTVDM QIMR**VNPR**TQ SSKMEVMK**FT EHTACECRPR RKQGEFDGPK EKPRRGGVRA KFFPDQLLTP GAL

Supporting Peptides:

| Peptide                       | Uniq | -10lgP | Mass      | Length | ppm  | m/z      | z | RT    | Fraction | Scan     | Source File               | Area F1  | Area F  |
|-------------------------------|------|--------|-----------|--------|------|----------|---|-------|----------|----------|---------------------------|----------|---------|
| K.HTVDMQIMR.V                 | N    | 70.60  | 1129.5372 | 9      | -0.2 | 565.7758 | 2 | 32.19 | 7        | F7:8643  | 17112021_RID_2349_DP7.raw | 1.1569E6 | 7.4694E |
| K.HTVDMQIM(+15.99)R.V         | N    | 68.64  | 1145.5321 | 9      | 1.0  | 573.7739 | 2 | 24.76 | 7        | F7:6460  | 17112021_RID_2349_DP7.raw | 5.9884E5 | 4.6869E |
| K.HTVDM(+15.99)QIM(+15.99)R.V | N    | 62.07  | 1161.5271 | 9      | 0.3  | 581.7710 | 2 | 18.23 | 7        | F7:3828  | 17112021_RID_2349_DP7.raw | 7.9377E4 | 3.9021E |
| K.HTVDM(+15.99)QIMR.V         | N    | 58.98  | 1145.5321 | 9      | 0.3  | 573.7735 | 2 | 23.27 | 7        | F7:5513  | 17112021_RID_2349_DP7.raw | 7.1174E5 |         |
| Q.GQVRPFLDVYQR.S              | Y    | 55.17  | 1476.7837 | 12     | -0.3 | 493.2684 | 3 | 42.18 | 7        | F7:12014 | 17112021_RID_2349_DP7.raw |          |         |
| R.PFLDVYQR.S                  | N    | 49.73  | 1036.5342 | 8      | -0.1 | 519.2743 | 2 | 44.38 | 7        | F7:12800 | 17112021_RID_2349_DP7.raw |          |         |
| V.RPFLDVYQR.S                 | N    | 45.90  | 1192.6353 | 9      | 1.7  | 597.3259 | 2 | 38.63 | 7        | F7:10909 | 17112021_RID_2349_DP7.raw |          |         |
| R.TQSSKMEVMK.F                | N    | 45.83  | 1167.5627 | 10     | -0.2 | 584.7885 | 2 | 20.39 | 1        | F1:5202  | 12112021_RID_2349_DP1.raw | 1.9831E5 |         |

TRINITY\_DN6726  
[back to list](#)

| [Protein Coverage](#) | [Supporting Peptides](#) |

Protein Coverage:

1

MVLTAEDRRL LQASVAKLGC R**LEDIGADAL NRLLIVYPSS KTYFSHYNLS PGSK**DIHQQG EKV GKALDSA LKHLDDIRGT

81

LSQLSDLHAY **NLRVDPVNFK**LLSKCFHVSL ATHLRNEYNA CCCLAWDKFL EQVSDMLCEK YR

Supporting Peptides:

| Peptide           | Uniq | -10lgP | Mass      | Length | ppm  | m/z      | z | RT    | Fraction | Scan     | Source File               | Area F1 | Area F2 | Area F3 | Area F4 | Area F |
|-------------------|------|--------|-----------|--------|------|----------|---|-------|----------|----------|---------------------------|---------|---------|---------|---------|--------|
| R.LEDIGADALNR.L   | Y    | 73.37  | 1185.5989 | 11     | 0.8  | 593.8072 | 2 | 39.17 | 7        | F7:11029 | 17112021_RID_2349_DP7.raw |         |         |         |         |        |
| K.TYFSHYNLSPGSK.D | Y    | 66.43  | 1499.7045 | 13     | 1.3  | 750.8605 | 2 | 36.62 | 7        | F7:10149 | 17112021_RID_2349_DP7.raw |         |         |         |         |        |
| N.LRVDPVNFK.L     | N    | 42.14  | 1086.6185 | 9      | 0.0  | 544.3165 | 2 | 36.89 | 7        | F7:10234 | 17112021_RID_2349_DP7.raw |         |         |         |         | 4.6379 |
| R.LLIVYPSSK.T     | Y    | 41.76  | 1018.6063 | 9      | -0.6 | 510.3101 | 2 | 43.65 | 7        | F7:12634 | 17112021_RID_2349_DP7.raw |         |         |         |         |        |

total 4 peptides

TRINITY\_DN3927  
[back to list](#)

| [Protein Coverage](#) | [Supporting Peptides](#) |

Protein Coverage:

|      |            |            |            |            |            |            |            |            |            |
|------|------------|------------|------------|------------|------------|------------|------------|------------|------------|
| 1    | MTPVAGFFLS | LSVGVALALD | ASLMPPNYNM | TEEGARLFAN | DYNTTGEIVF | FESISASWNY | NTNLTNHNAQ | KQIAAFLKEQ |            |
| 81   | EFTELWGGKA | KENYGKIWN  | FTDPQLKKII | SSIQTLGPSN | LPVQK      | REEYN      | TILSEMDSIY | STATVCLPNQ | NSHCWALEPD |
| 161  | ITDIMATSHS | YRKLLYAWEG | WHNSAGNPLR | SKYEKFSVLS | NEAYKMDGFQ | DTGAYWRSWY | DSPTFKEDLE | QLYQQLEPLY |            |
| 241  | LNLHAYVRRK | LYNQYGSYI  | NLKGPIPAHL | LGNMWAQQWN | NIYDIMVPFA | NKSHLDVTNT | MKQKNWNTTH | MFRVSEEFFT |            |
| 321  | SLGMFGMPPE | FWEKSMLEKP | TDGRDVVCHA | SAWDFNRRKD | FRIKQCTTVT | MEQLFTVHHE | MGHVQYYLQY | KNQPISFRSG |            |
| 401  | ANPGFHEAIG | DVMSLSVSTP | IHLKKIELLT | HVTEDKESDI | NYLLKMALEK | IAFLPFGYLI | DQWRWDVFSG | RTPPSRYNFD |            |
| 481  | WWYLRTKYQG | ICPPIARNET | NFDPGAKYHI | PGNTPYIRYF | VSFILQFQFH | KALCQAAANT | GDLHTCDIYN | SKDAGQKLSE |            |
| 561  | AMKAGSSQPW | QDILQQLTGT | NKMDASALLE | YFKPVMWLE  | KENGKNNETL | GWPEFDWRPP | VPEGYPEGLD | KITDEAEAKA |            |
| 641  | FLEKYNSTAE | VVWNAYTEAS | WTYNVNITEH | NKQIMLEKNF | AMSNHTLQNG | LKARQFDSTD | FKDPKIKRIL | KKLSDIERSA |            |
| 721  | LPEAELKEYN | QLLSEMETIY | SVAKICGKDT | DCKALDPDLT | DTMAK      | SRDYD      | ELLNTWKGWR | DASGKKIRRH | YERYVQLSNK |
| 801  | AAKLNGHADN | GAYWRSLEYT | PTFETDLENI | WYQLQPLYFN | LHAYVRRALY | KKYGEKRINL | KGPIPAHLLG | NMWAQSWANI |            |
| 881  | FDLVMPFPDA | TKVDATPAMI | QQGWTPTKMF | EQSDSFFKSL | GLIPMPPEFW | EKSMLEKPSD | GREVVCHASA | WDFYNRKDFR |            |
| 961  | IKQCTVVNMD | DLITVHHEMG | HVQYFLQYKD | QPISFREGAN | PGFHEAIGDV | MALSVSTPKH | LKNIKLLEHL | EDNIESDINY |            |
| 1041 | LMSIALDKIA | FLPFGYLIDQ | WRWKVFDGRI | PKKEYNQQWW | NLRLKYQGLC | PPTPRSEEDF | DPGAK      | FHIPA      | NVPYVRYFVS |
| 1121 | FIIQFQFHQA | LCKAAGHTGP | LYKCDIYQSK | EAGKILGDAL | KLGFSRPWPE | VMQNITGQPN | MSAEGLLTYF | EPLTKWLIEK |            |
| 1201 | NRQNNETLGW | PEYTWQAYAG | GSEVNFLGMS | LSSSQIETGQ | WILLAIGLML | LITTIALSVI | YFRRRRKGFK | SSSEMELK   |            |

Supporting Peptides:

| Peptide              | Uniq | -10lgP | Mass      | Length | ppm | m/z      | z | RT    | Fraction | Scan     | Source File               | Area F1  | Area F2 | Area F3 | A  |
|----------------------|------|--------|-----------|--------|-----|----------|---|-------|----------|----------|---------------------------|----------|---------|---------|----|
| K.MFEQSDSFFK.S       | Y    | 55.53  | 1264.5433 | 10     | 0.0 | 633.2789 | 2 | 49.45 | 1        | F1:15052 | 12112021_RID_2349_DP1.raw | 2.2329E5 |         |         | 7. |
| K.VDATPAMIQQGWTPTK.M | Y    | 54.44  | 1742.8661 | 16     | 1.2 | 872.4414 | 2 | 48.04 | 1        | F1:14537 | 12112021_RID_2349_DP1.raw | 9.7075E4 |         |         |    |
| K.IISSIQLGPSNLPVQK.R | Y    | 50.12  | 1794.0250 | 17     | 1.2 | 898.0209 | 2 | 50.02 | 1        | F1:15184 | 12112021_RID_2349_DP1.raw | 4.8193E5 |         |         |    |
| R.SEEDFDPGAK.F       | Y    | 47.52  | 1093.4563 | 10     | 0.2 | 547.7355 | 2 | 27.98 | 1        | F1:7775  | 12112021_RID_2349_DP1.raw | 1.7742E5 |         |         |    |
| K.ALDPDLTDTMAK.S     | Y    | 45.71  | 1289.6173 | 12     | 1.4 | 645.8168 | 2 | 42.38 | 4        | F4:12047 | 17112021_RID_2349_DP4.raw |          |         |         | 4. |

total 5 peptides

TRINITY\_DN2452

[back to list](#)

[Protein Coverage](#) | [Supporting Peptides](#) |

Protein Coverage:

|     |            |            |            |             |            |            |            |            |  |
|-----|------------|------------|------------|-------------|------------|------------|------------|------------|--|
| 1   | SETHYSPDGR | EITTNPVED  | HCYYYGRIQN | DADSTASISA  | CNGLKGHFQL | QGKTYLIEPL | KIPESEAHAI | YKYENIEKED |  |
| 81  | EGPKKCGVTQ | TNWESEPIK  | KASQLVATSE | QRRFPKRYIK  | LVVVADHRMF | TKYNNSTAI  | RTWIYEMINT | VNEVFLPLNI |  |
| 161 | HVPLVGVEIW | CKEDLISVVS | SSGDTLDSFG | EWRRKRDLLNR | KRHDNAYLLT | AIDFHG     |            |            |  |

Supporting Peptides:

| Peptide                  | Uniq | -10lgP | Mass      | Length | ppm  | m/z       | z | RT    | Fraction | Scan     | Source File               | Area F1  | Area F2 | Area F3 | A |
|--------------------------|------|--------|-----------|--------|------|-----------|---|-------|----------|----------|---------------------------|----------|---------|---------|---|
| A.SQLVATSEQR.R           | N    | 61.23  | 1117.5728 | 10     | 0.3  | 559.7938  | 2 | 23.26 | 1        | F1:6173  | 12112021_RID_2349_DP1.raw | 8.3452E4 | 1.5756  |         |   |
| D.TLDSFGEWR.K            | N    | 52.86  | 1109.5142 | 9      | 0.7  | 555.7648  | 2 | 47.54 | 2        | F2:13529 | 12112021_RID_2349_DP2.raw |          | 8.0796  |         |   |
| K.EDLISVSSSGDTLDSFGEWR.K | Y    | 47.78  | 2298.0652 | 21     | -0.1 | 1150.0398 | 2 | 71.06 | 3        | F3:21425 | 17112021_RID_2349_DP3.raw |          |         |         |   |
| K.LVVVADHR.M             | Y    | 47.56  | 907.5239  | 8      | -0.4 | 454.7690  | 2 | 23.50 | 2        | F2:5404  | 12112021_RID_2349_DP2.raw | 5.2396E5 | 1.7998  |         |   |
| V.TQTNWESEPIKK.A         | N    | 44.98  | 1574.7576 | 13     | 0.5  | 788.3865  | 2 | 30.75 | 1        | F1:8710  | 12112021_RID_2349_DP1.raw | 3.3503E5 |         |         |   |

total 5 peptides

P82475.2

[back to list](#)

[Protein Coverage](#) | [Supporting Peptides](#) |

Protein Coverage:

|    |            |            |            |            |            |            |            |      |        |  |
|----|------------|------------|------------|------------|------------|------------|------------|------|--------|--|
| 1  | QVRPFPDVYQ | RSACQARETL | VSILQEYPDE | ISDIFRPSCV | AVLRCSGCCT | DESLKCTPVG | KHTVDMQIMR | VNPR | TQSSKM |  |
| 81 | EVMK       | FTEHTA     | CECRPRRKQG | EPDGPKEKPR |            |            |            |      |        |  |

Supporting Peptides:

| Peptide | Uniq | -10lgP | Mass | Length | ppm | m/z | z | RT | Fraction | Scan | Source File | Area F1 | Area F2 | Area F3 | A |
|---------|------|--------|------|--------|-----|-----|---|----|----------|------|-------------|---------|---------|---------|---|
|---------|------|--------|------|--------|-----|-----|---|----|----------|------|-------------|---------|---------|---------|---|

| Peptide                       | Uniq | -10lgP | Mass      | Length | ppm  | m/z      | z | RT    | Fraction | Scan     | Source File               | Area F1  | Area F  |
|-------------------------------|------|--------|-----------|--------|------|----------|---|-------|----------|----------|---------------------------|----------|---------|
| K.HTVDMQIMR.V                 | N    | 70.60  | 1129.5372 | 9      | -0.2 | 565.7758 | 2 | 32.19 | 7        | F7:8643  | 17112021_RID_2349_DP7.raw | 1.1569E6 | 7.4694E |
| K.HTVDMQIM(+15.99)R.V         | N    | 68.64  | 1145.5321 | 9      | 1.0  | 573.7739 | 2 | 24.76 | 7        | F7:6460  | 17112021_RID_2349_DP7.raw | 5.9884E5 | 4.6869E |
| K.HTVDM(+15.99)QIM(+15.99)R.V | N    | 62.07  | 1161.5271 | 9      | 0.3  | 581.7710 | 2 | 18.23 | 7        | F7:3828  | 17112021_RID_2349_DP7.raw | 7.9377E4 | 3.9021E |
| K.HTVDM(+15.99)QIMR.V         | N    | 58.98  | 1145.5321 | 9      | 0.3  | 573.7735 | 2 | 23.27 | 7        | F7:5513  | 17112021_RID_2349_DP7.raw | 7.1174E5 |         |
| R.PFPDVYQR.S                  | Y    | 50.92  | 1020.5028 | 8      | 0.4  | 511.2589 | 2 | 39.38 | 7        | F7:11284 | 17112021_RID_2349_DP7.raw |          |         |
| R.TQSSKMEVMK.F                | N    | 45.83  | 1167.5627 | 10     | -0.2 | 584.7885 | 2 | 20.39 | 1        | F1:5202  | 12112021_RID_2349_DP1.raw | 1.9831E5 |         |
| V.RPFPDVYQR.S                 | Y    | 42.95  | 1176.6040 | 9      | 0.6  | 589.3096 | 2 | 33.46 | 7        | F7:9070  | 17112021_RID_2349_DP7.raw |          |         |
| Q.VRPFPDVYQR.S                | Y    | 42.10  | 1275.6724 | 10     | 0.8  | 638.8440 | 2 | 37.19 | 7        | F7:10314 | 17112021_RID_2349_DP7.raw |          |         |

TRINITY\_DN30  
[back to list](#)

| [Protein Coverage](#) | [Supporting Peptides](#) |  
Protein Coverage:

|     |             |            |             |             |            |            |             |             |            |            |     |  |  |
|-----|-------------|------------|-------------|-------------|------------|------------|-------------|-------------|------------|------------|-----|--|--|
| 1   | MMQVLLVTIC  | LAVFPYQGSS | IILESGNVND  | YEVVYPQKVT  | ALPKGAIQQL | EQKYEDAIQY | QFKVKGEPVV  | LHLEKNKDDFF |            |            |     |  |  |
| 81  | PENYSETHYS  | PDDREITTNP | PVEDHCYYHG  | HIQNEADSTA  | SISACNGLKG | HFKLQGETYL | IEPLKIPDSE  | AHAVYKYENI  |            |            |     |  |  |
| 161 | EKEDEAPKMC  | GV         | TQTNWESD    | EPIKKASQLV  | ATSEQR     | RNFQ       | KYIELVIVVD  | NVMFRKYTGN  | STAIRTRIYE | IVNTLNLIYT |     |  |  |
| 241 | ILNIHIALVY  | LEIWSKGLI  | NVQSVVDVTL  | NS          | SFGEWRERD  | LLNR       | KRHDNA      | QLLTGMTFDL  | STLGITFFAG | MCQAYR     | SVG |  |  |
| 321 | IQYYSTTNLR  | IAVTMAHEIG | HNVG MKHDTY | YCTCGNSCI   | MSAVLSNQPS | KPFSNCSNHD | YQRYLTRYKP  | KCIFNPPLRT  |            |            |     |  |  |
| 401 | DIVSRAVCGN  | EIWEEGEECD | CGSPGNCQNP  | CCNAATCKLT  | PGSQCADGEC | CDQCRIQTAG | TVCRRARDEC  | DVPEHCTGQS  |            |            |     |  |  |
| 481 | AEC PVDGFHA | NGQPCQNNNG | YCYNGNCPIL  | TDQCISLFGS  | RATVAEDSCF | QENQKGSYYG | YCRKENG RKI | PCAPEDEKCG  |            |            |     |  |  |
| 561 | RLYCSYNLLG  | NHIPCPYYR  | RNREDKGMVD  | HG TKCGDGKV | CSNRHCVDVT | TAY        |             |             |            |            |     |  |  |

Supporting Peptides:

| Peptide            | Uniq | -10lgP | Mass      | Length | ppm  | m/z      | z | RT    | Fraction | Scan     | Source File               | Area F1  | Area F2  | Area F3  |
|--------------------|------|--------|-----------|--------|------|----------|---|-------|----------|----------|---------------------------|----------|----------|----------|
| A.SQLVATSEQR.R     | N    | 61.23  | 1117.5728 | 10     | 0.3  | 559.7938 | 2 | 23.26 | 1        | F1:6173  | 12112021_RID_2349_DP1.raw | 8.3452E4 | 1.5759E4 |          |
| N.SFGEWRER.D       | N    | 55.07  | 1065.4991 | 8      | 0.1  | 533.7569 | 2 | 31.26 | 2        | F2:7954  | 12112021_RID_2349_DP2.raw | 6.0265E6 | 2.4122E6 |          |
| V.TQTNWESDEPIKK.A  | N    | 44.98  | 1574.7576 | 13     | 0.5  | 788.3865 | 2 | 30.75 | 1        | F1:8710  | 12112021_RID_2349_DP1.raw | 3.3503E5 |          | 7.2185E4 |
| R.SVGVIQYYSTTNLR.I | Y    | 42.94  | 1599.8257 | 14     | 1.7  | 800.9214 | 2 | 48.04 | 2        | F2:13703 | 12112021_RID_2349_DP2.raw |          | 0        |          |
| R.ERDLLNR.K        | N    | 42.02  | 914.4933  | 7      | -0.1 | 458.2539 | 2 | 23.23 | 1        | F1:6203  | 12112021_RID_2349_DP1.raw | 1.8049E7 | 3.2804E6 |          |

total 5 peptides

JAS04521.1  
[back to list](#)

| [Protein Coverage](#) | [Supporting Peptides](#) |  
Protein Coverage:

|     |            |            |            |             |            |             |             |            |            |  |  |  |  |  |
|-----|------------|------------|------------|-------------|------------|-------------|-------------|------------|------------|--|--|--|--|--|
| 1   | MSMLCYTLII | AFLIGIWAAP | KSEDNVPLGS | PATSDLS DTS | CAKTHEALKT | SRNTDQHYP A | PKKAEDQ EFG | SAANIIVDPK |            |  |  |  |  |  |
| 81  | LFQKRRFQSP | RVLFSTQPPP | LSRDEQNVDN | ANSLNRNIRA  | KREDHPVHNR | GEYSVCD SVN | VWVANKTTAT  | DIRGNVVTVM |            |  |  |  |  |  |
| 161 | VDVNINNNVY | KQYFFETK   | CR         | NPNPVPTGCR  | GIDARHWNSY | CTTTNTFVKA  | LTMEGNQASW  | RFIRIDSACV | CVISRKNENF |  |  |  |  |  |
| 241 | G          |            |            |             |            |             |             |            |            |  |  |  |  |  |

Supporting Peptides:

| Peptide                  | Uniq | -10lgP | Mass      | Length | ppm | m/z      | z | RT    | Fraction | Scan     | Source File               | Area F1 | Area F2 | Area F3  |
|--------------------------|------|--------|-----------|--------|-----|----------|---|-------|----------|----------|---------------------------|---------|---------|----------|
| K.ALTMEGNQASWR.F         | N    | 80.22  | 1362.6350 | 12     | 0.4 | 682.3251 | 2 | 38.77 | 5        | F5:10781 | 17112021_RID_2349_DP5.raw |         |         | 4.2979E5 |
| K.ALTM(+15.99)EGNQASWR.F | N    | 77.11  | 1378.6299 | 12     | 0.1 | 690.3223 | 2 | 36.09 | 5        | F5:10910 | 17112021_RID_2349_DP5.raw |         |         |          |
| R.NPNPVPTGC(+57.02).R.G  | Y    | 58.52  | 1110.5240 | 10     | 0.3 | 556.2695 | 2 | 23.20 | 5        | F5:5451  | 17112021_RID_2349_DP5.raw |         |         |          |
| K.QYFFETK.C              | N    | 55.57  | 961.4545  | 7      | 0.5 | 481.7347 | 2 | 40.77 | 5        | F5:11527 | 17112021_RID_2349_DP5.raw |         |         |          |

AAG12169.1  
[back to list](#)

### Protein Coverage:

### Supporting Peptides:

[back to list](#)

Protein Coverage:

### Supporting Peptides:

[back to list](#)

### Protein Coverage:

### Supporting Peptides:

[back to list](#)

Protein Coverage:

1MSMLCYTLIIAFLIGIWAAPKSEDNVPLGSPATSDLSDTSCAKTHEALKTSRNTDQHYPAPKKAEDQEFQSAANIIVDPK

81LFQKRRFQSPRVLFSTQPPP LSRDEQSVDNANSNRNIRAKREDHPVHKRGEYSVCDSVN VVWANKTTAT DIRGNLVTVM

161VDVNINNNVYKQYFFETKCRNPNPVPTGCRGIDARHWNSYCTTTNTFVKAALTMEGNQASWRREFIRIDSACV CVISRKNENF

241G

213

Supporting Peptides:

| Peptide                  | Uniq | -10lgP | Mass      | Length | ppm | m/z      | z | RT    | Fraction | Scan     | Source File               | Area F1 | Area F2 | Area F3  |
|--------------------------|------|--------|-----------|--------|-----|----------|---|-------|----------|----------|---------------------------|---------|---------|----------|
| K.ALTMEGNQASWR.F         | N    | 80.22  | 1362.6350 | 12     | 0.4 | 682.3251 | 2 | 38.77 | 5        | F5:10781 | 17112021_RID_2349_DP5.raw |         |         | 4.2979E5 |
| K.ALTM(+15.99)EGNQASWR.F | N    | 77.11  | 1378.6299 | 12     | 0.1 | 690.3223 | 2 | 36.09 | 5        | F5:10910 | 17112021_RID_2349_DP5.raw |         |         |          |
| R.NPNPVPTGC(+57.02)R.G   | Y    | 58.52  | 1110.5240 | 10     | 0.3 | 556.2695 | 2 | 23.20 | 5        | F5:5451  | 17112021_RID_2349_DP5.raw |         |         |          |
| K.QYFFETK.C              | N    | 55.57  | 961.4545  | 7      | 0.5 | 481.7347 | 2 | 40.77 | 5        | F5:11527 | 17112021_RID_2349_DP5.raw |         |         |          |

JAI10407.1  
[back to list](#)

[Protein Coverage](#) | [Supporting Peptides](#) |

Protein Coverage:

1MSMLCYTLIIAFLIGIWAAPKSEDNVPLGSPATSDLSDTSCAKTHEALKTSRNTDQHYPAPKKAEDQEFQSAANIIVDPK

81LFQKRRFQSPRVLFSTQPPP LSRDEQSVDNANSLNRNIRAKREDHPVHKRGEYSVCDSVN VVWANKTTAT DIRGNLVTVM

161VDVNINNNVYKQYFFETKCRNPNPVPTGCRGIDARHWNSYCTTTNTFVKAALTMEGNQASWRREFIRIDSACV CVISRKNENF

241G

213

Supporting Peptides:

| Peptide                  | Uniq | -10lgP | Mass      | Length | ppm | m/z      | z | RT    | Fraction | Scan     | Source File               | Area F1 | Area F2 | Area F3  |
|--------------------------|------|--------|-----------|--------|-----|----------|---|-------|----------|----------|---------------------------|---------|---------|----------|
| K.ALTMEGNQASWR.F         | N    | 80.22  | 1362.6350 | 12     | 0.4 | 682.3251 | 2 | 38.77 | 5        | F5:10781 | 17112021_RID_2349_DP5.raw |         |         | 4.2979E5 |
| K.ALTM(+15.99)EGNQASWR.F | N    | 77.11  | 1378.6299 | 12     | 0.1 | 690.3223 | 2 | 36.09 | 5        | F5:10910 | 17112021_RID_2349_DP5.raw |         |         |          |
| R.NPNPVPTGC(+57.02)R.G   | Y    | 58.52  | 1110.5240 | 10     | 0.3 | 556.2695 | 2 | 23.20 | 5        | F5:5451  | 17112021_RID_2349_DP5.raw |         |         |          |
| K.QYFFETK.C              | N    | 55.57  | 961.4545  | 7      | 0.5 | 481.7347 | 2 | 40.77 | 5        | F5:11527 | 17112021_RID_2349_DP5.raw |         |         |          |

JAS05454.1  
[back to list](#)

[Protein Coverage](#) | [Supporting Peptides](#) |

Protein Coverage:

1MSMLCYTLIIAFLIGIWAAPKSEDNVPLGSPATSDLSDTSCAKTHEALKTSRNTDQHYPAPKKAEDQEFQSAANIIVDPK

81LFQKRRFQSPRVLFSTQPPP LSRDEQSVDNANSLNRNIRAKREDHPVHNQGEYSVCDSVD VVWANKTTAT DIRGNLVTVM

161VDVNINNNVYKQYFFETKCRNPNPVPTGCRGIDARHWNSYCTTTETFVKAALTMEGNQASWRREFIRIDSACV CVISRKNENF

241G

213

Supporting Peptides:

| Peptide                  | Uniq | -10lgP | Mass      | Length | ppm | m/z      | z | RT    | Fraction | Scan     | Source File               | Area F1 | Area F2 | Area F3  |
|--------------------------|------|--------|-----------|--------|-----|----------|---|-------|----------|----------|---------------------------|---------|---------|----------|
| K.ALTMEGNQASWR.F         | N    | 80.22  | 1362.6350 | 12     | 0.4 | 682.3251 | 2 | 38.77 | 5        | F5:10781 | 17112021_RID_2349_DP5.raw |         |         | 4.2979E5 |
| K.ALTM(+15.99)EGNQASWR.F | N    | 77.11  | 1378.6299 | 12     | 0.1 | 690.3223 | 2 | 36.09 | 5        | F5:10910 | 17112021_RID_2349_DP5.raw |         |         |          |
| R.NPNPVPTGC(+57.02)R.G   | Y    | 58.52  | 1110.5240 | 10     | 0.3 | 556.2695 | 2 | 23.20 | 5        | F5:5451  | 17112021_RID_2349_DP5.raw |         |         |          |
| K.QYFFETK.C              | N    | 55.57  | 961.4545  | 7      | 0.5 | 481.7347 | 2 | 40.77 | 5        | F5:11527 | 17112021_RID_2349_DP5.raw |         |         |          |

JAS04703.1  
[back to list](#)

[Protein Coverage](#) | [Supporting Peptides](#) |

Protein Coverage:

1MSMLCYTLIIAFLIGIWAAPKSEDNVPLGSPATSDLSDTSCAKTHEALKTSRNTDQHYPAPKKAEDQEFQSAANIIVDPK

81LFQKRRFQSPRVLFSTQPPP LSRDEQSVDNANSLNRNIRAKREDHPVHKRGEYSVCDSVN VVWANKTTATDIRGNLVTVM

161VDVNINNNVYKQYFFETKCRNPNPVPTGCRGIDARHWNSYCTTTNTFVKALTMEGNQASWRREFIRIDSACV CVISRKNENF

241G

213

Supporting Peptides:

| Peptide                  | Uniq | -10lgP | Mass      | Length | ppm | m/z      | z | RT    | Fraction | Scan     | Source File               | Area F1 | Area F2 | Area F3  |
|--------------------------|------|--------|-----------|--------|-----|----------|---|-------|----------|----------|---------------------------|---------|---------|----------|
| K.ALTMEGNQASWR.F         | N    | 80.22  | 1362.6350 | 12     | 0.4 | 682.3251 | 2 | 38.77 | 5        | F5:10781 | 17112021_RID_2349_DP5.raw |         |         | 4.2979E5 |
| K.ALTM(+15.99)EGNQASWR.F | N    | 77.11  | 1378.6299 | 12     | 0.1 | 690.3223 | 2 | 36.09 | 5        | F5:10910 | 17112021_RID_2349_DP5.raw |         |         |          |
| R.NPNPVPTGC(+57.02)R.G   | Y    | 58.52  | 1110.5240 | 10     | 0.3 | 556.2695 | 2 | 23.20 | 5        | F5:5451  | 17112021_RID_2349_DP5.raw |         |         |          |
| K.QYFFETK.C              | N    | 55.57  | 961.4545  | 7      | 0.5 | 481.7347 | 2 | 40.77 | 5        | F5:11527 | 17112021_RID_2349_DP5.raw |         |         |          |

JAG46130.1  
[back to list](#)

[Protein Coverage](#) | [Supporting Peptides](#) |

Protein Coverage:

1MSMLCYTLIIAFLIGIWAAPKSEDNVPLGSPATSDLSDTSCAKTHEALKTSRNTDQHYPAPKKAEDQEFQSAANIIVDPK

81LFQKRRFQSPRVLFSTQPPP LSRDEQSVDNANSLNRNIRAKREDHPVHKRGEYSVCDSVN VVWANKTTATDIRGNLVTVM

161VDVNINNNVYKQYFFETKCRNPNPVPTGCRGIDARHWNSYCTTTNTFVKALTMEGNQASWRREFIRIDSACV CVISRKNENF

241G

213

Supporting Peptides:

| Peptide                  | Uniq | -10lgP | Mass      | Length | ppm | m/z      | z | RT    | Fraction | Scan     | Source File               | Area F1 | Area F2 | Area F3  |
|--------------------------|------|--------|-----------|--------|-----|----------|---|-------|----------|----------|---------------------------|---------|---------|----------|
| K.ALTMEGNQASWR.F         | N    | 80.22  | 1362.6350 | 12     | 0.4 | 682.3251 | 2 | 38.77 | 5        | F5:10781 | 17112021_RID_2349_DP5.raw |         |         | 4.2979E5 |
| K.ALTM(+15.99)EGNQASWR.F | N    | 77.11  | 1378.6299 | 12     | 0.1 | 690.3223 | 2 | 36.09 | 5        | F5:10910 | 17112021_RID_2349_DP5.raw |         |         |          |
| R.NPNPVPTGC(+57.02)R.G   | Y    | 58.52  | 1110.5240 | 10     | 0.3 | 556.2695 | 2 | 23.20 | 5        | F5:5451  | 17112021_RID_2349_DP5.raw |         |         |          |
| K.QYFFETK.C              | N    | 55.57  | 961.4545  | 7      | 0.5 | 481.7347 | 2 | 40.77 | 5        | F5:11527 | 17112021_RID_2349_DP5.raw |         |         |          |

JAA98018.1  
[back to list](#)

[Protein Coverage](#) | [Supporting Peptides](#) |

Protein Coverage:

1MSMLCYTLIIAFLIGIWAAPKSEDNVPLGSPATSDLSDTSCAKTHEALKTSRNTDQHYPAPKKAEDQEFQSAANIIVDPK

81LFQKRRFQSPRVLFSTQPPP LSRDEQSVDNANSLNRNIRAKREDHPVHKRGEYSVCDSVD VVWANKTTATDIRGNLVTVM

161VDVNINNNVYKQYFFETKCRNPNPVPTGCRGIDARHWNSYCTTTNTFVKALTMEGNQASWRREFIRIDSACV CVISRKNENF

241G

213

Supporting Peptides:

| Peptide                  | Uniq | -10lgP | Mass      | Length | ppm | m/z      | z | RT    | Fraction | Scan     | Source File               | Area F1 | Area F2 | Area F3  |
|--------------------------|------|--------|-----------|--------|-----|----------|---|-------|----------|----------|---------------------------|---------|---------|----------|
| K.ALTMEGNQASWR.F         | N    | 80.22  | 1362.6350 | 12     | 0.4 | 682.3251 | 2 | 38.77 | 5        | F5:10781 | 17112021_RID_2349_DP5.raw |         |         | 4.2979E5 |
| K.ALTM(+15.99)EGNQASWR.F | N    | 77.11  | 1378.6299 | 12     | 0.1 | 690.3223 | 2 | 36.09 | 5        | F5:10910 | 17112021_RID_2349_DP5.raw |         |         |          |
| R.NPNPVPTGC(+57.02)R.G   | Y    | 58.52  | 1110.5240 | 10     | 0.3 | 556.2695 | 2 | 23.20 | 5        | F5:5451  | 17112021_RID_2349_DP5.raw |         |         |          |
| K.QYFFETK.C              | N    | 55.57  | 961.4545  | 7      | 0.5 | 481.7347 | 2 | 40.77 | 5        | F5:11527 | 17112021_RID_2349_DP5.raw |         |         |          |

AAG30924.1  
[back to list](#)

[Protein Coverage](#) | [Supporting Peptides](#) |

Protein Coverage:

1MSMLCYTLIIAFLIGIWAAPKSEDNVPLGSPATSDLSDTSCAKTHEALKTSRNIDQHYPAPKKAEDQEFGSAANIIVDPK

81LFQKRRFQSPRVLFSTQPPP LSRDEQSVDNANSLNRNIRAKREDHPVHKRGEYSVCDSNVVWANKTTATDIRGNLVTVM

161VDVNINNNVYKQYFFETKCRNPNPVPTGCRGIDARHWNSYCTTTNTFVKALTMEGNQASWRFRIFRIDSACV CVISRKNENF

213

241G

Supporting Peptides:

| Peptide                  | Uniq | -10lgP | Mass      | Length | ppm | m/z      | z | RT    | Fraction | Scan     | Source File               | Area F1 | Area F2 | Area F3  |
|--------------------------|------|--------|-----------|--------|-----|----------|---|-------|----------|----------|---------------------------|---------|---------|----------|
| K.ALTMEGNQASWR.F         | N    | 80.22  | 1362.6350 | 12     | 0.4 | 682.3251 | 2 | 38.77 | 5        | F5:10781 | 17112021_RID_2349_DP5.raw |         |         | 4.2979E5 |
| K.ALTM(+15.99)EGNQASWR.F | N    | 77.11  | 1378.6299 | 12     | 0.1 | 690.3223 | 2 | 36.09 | 5        | F5:10910 | 17112021_RID_2349_DP5.raw |         |         |          |
| R.NPNPVPTGC(+57.02)R.G   | Y    | 58.52  | 1110.5240 | 10     | 0.3 | 556.2695 | 2 | 23.20 | 5        | F5:5451  | 17112021_RID_2349_DP5.raw |         |         |          |
| K.QYFFETK.C              | N    | 55.57  | 961.4545  | 7      | 0.5 | 481.7347 | 2 | 40.77 | 5        | F5:11527 | 17112021_RID_2349_DP5.raw |         |         |          |

JAS05315.1  
[back to list](#)

[Protein Coverage](#) | [Supporting Peptides](#) |

Protein Coverage:

1MSMLCYTLIIAFLIGIWAAPKSEDNVPLGSPATSDLSDTSCAKTHEALKTSRNIDQHYPAPKKAEDQEFVSAANIIVDPK

81LFQKRRFQSPRVLFSTQPPP LSRDEQSVDNANSLNRNIRAKREDHPVHNRGEYSVCDSNVVWANKTTATDIRGNLVTVM

161VNVNINNNVYKQYFFETKCRNPNPVPTGCRGIDARHWNSYCTTTTTFVKALTMEGNQASWRFRIFRIDSACV CVISRKNENF

213

241G

Supporting Peptides:

| Peptide                  | Uniq | -10lgP | Mass      | Length | ppm | m/z      | z | RT    | Fraction | Scan     | Source File               | Area F1 | Area F2 | Area F3  |
|--------------------------|------|--------|-----------|--------|-----|----------|---|-------|----------|----------|---------------------------|---------|---------|----------|
| K.ALTMEGNQASWR.F         | N    | 80.22  | 1362.6350 | 12     | 0.4 | 682.3251 | 2 | 38.77 | 5        | F5:10781 | 17112021_RID_2349_DP5.raw |         |         | 4.2979E5 |
| K.ALTM(+15.99)EGNQASWR.F | N    | 77.11  | 1378.6299 | 12     | 0.1 | 690.3223 | 2 | 36.09 | 5        | F5:10910 | 17112021_RID_2349_DP5.raw |         |         |          |
| R.NPNPVPTGC(+57.02)R.G   | Y    | 58.52  | 1110.5240 | 10     | 0.3 | 556.2695 | 2 | 23.20 | 5        | F5:5451  | 17112021_RID_2349_DP5.raw |         |         |          |
| K.QYFFETK.C              | N    | 55.57  | 961.4545  | 7      | 0.5 | 481.7347 | 2 | 40.77 | 5        | F5:11527 | 17112021_RID_2349_DP5.raw |         |         |          |

JAV01886.1  
[back to list](#)

[Protein Coverage](#) | [Supporting Peptides](#) |

Protein Coverage:

1MSMLCYTLIIAFLIGIWAAPKSEDNVPLGSPATSDLSVTSCAKTHEALKTSRNIDQHYPAPKKEEDQEFVSAANIIVDPK

81LFQKRRFQSPRVLFSTQPPP LSRDEQSVDNANSLNRNIRAKREDHPVHNRGEYSVCDSNVVWANKTTATDIRGNLVTVM

161VDVNINNNVYKQYFFETKCRNPNPVPTGCRGIDARHWNSYCTTTNTFVKALTMEGNQASWRFRIFRIDTACV CVISRKNENF

213

241G

Supporting Peptides:

| Peptide                  | Uniq | -10lgP | Mass      | Length | ppm | m/z      | z | RT    | Fraction | Scan     | Source File               | Area F1 | Area F2 | Area F3  |
|--------------------------|------|--------|-----------|--------|-----|----------|---|-------|----------|----------|---------------------------|---------|---------|----------|
| K.ALTMEGNQASWR.F         | N    | 80.22  | 1362.6350 | 12     | 0.4 | 682.3251 | 2 | 38.77 | 5        | F5:10781 | 17112021_RID_2349_DP5.raw |         |         | 4.2979E5 |
| K.ALTM(+15.99)EGNQASWR.F | N    | 77.11  | 1378.6299 | 12     | 0.1 | 690.3223 | 2 | 36.09 | 5        | F5:10910 | 17112021_RID_2349_DP5.raw |         |         |          |
| R.NPNPVPTGC(+57.02)R.G   | Y    | 58.52  | 1110.5240 | 10     | 0.3 | 556.2695 | 2 | 23.20 | 5        | F5:5451  | 17112021_RID_2349_DP5.raw |         |         |          |
| K.QYFFETK.C              | N    | 55.57  | 961.4545  | 7      | 0.5 | 481.7347 | 2 | 40.77 | 5        | F5:11527 | 17112021_RID_2349_DP5.raw |         |         |          |

JAS04865.1  
[back to list](#)

[Protein Coverage](#) | [Supporting Peptides](#) |

Protein Coverage:

### Supporting Peptides:

[back to list](#)

[Protein Coverage](#) | [Supporting Peptides](#)

Protein Coverage:

### Supporting Peptides:

[back to list](#)

| [Protein Coverage](#) | [Supporting Peptides](#) |

Protein Coverage:

### Supporting Peptides:

[back to list](#)

| [Protein Coverage](#) | [Supporting Peptides](#) |

Protein Coverage:

1MSMLCYTLIIAFLIGIWAAPKSEDNVPLGSPATSDLSDTSCAKTHEALKTSRNTDQHYPAPKKAEDQEFQSAANIIVDPK

81LFQKRRFQSPRVLFSTQPPP LSRDEQSVDNANSFNRNIRAKREDHPVHKRGEYSVCDSVN VVWANKTTAT DIRGNLVTVM

161VDVNINNNVYKQYFFETKCRNPNPVPTGCRGIDARHWNSYCTTTNTFVKAALTMEGNQASWRREFIRIDSACV CVISRKNENF

241G

213

Supporting Peptides:

| Peptide                  | Uniq | -10lgP | Mass      | Length | ppm | m/z      | z | RT    | Fraction | Scan     | Source File               | Area F1 | Area F2 | Area F3  |
|--------------------------|------|--------|-----------|--------|-----|----------|---|-------|----------|----------|---------------------------|---------|---------|----------|
| K.ALTMEGNQASWR.F         | N    | 80.22  | 1362.6350 | 12     | 0.4 | 682.3251 | 2 | 38.77 | 5        | F5:10781 | 17112021_RID_2349_DP5.raw |         |         | 4.2979E5 |
| K.ALTM(+15.99)EGNQASWR.F | N    | 77.11  | 1378.6299 | 12     | 0.1 | 690.3223 | 2 | 36.09 | 5        | F5:10910 | 17112021_RID_2349_DP5.raw |         |         |          |
| R.NPNPVPTGC(+57.02)R.G   | Y    | 58.52  | 1110.5240 | 10     | 0.3 | 556.2695 | 2 | 23.20 | 5        | F5:5451  | 17112021_RID_2349_DP5.raw |         |         |          |
| K.QYFFETK.C              | N    | 55.57  | 961.4545  | 7      | 0.5 | 481.7347 | 2 | 40.77 | 5        | F5:11527 | 17112021_RID_2349_DP5.raw |         |         |          |

AFJ49196.1

[back to list](#)

[| Protein Coverage](#) | [Supporting Peptides](#) |

Protein Coverage:

1MSMLCYTLIIAFLIGIWAAPKSEDNVPLGSPATSDLSDTSCAKTHEALKTSRNTDQHYPAPKKAEDQEFQSAANIIVDPK

81LFQKRRFQSPRVLFSTQPPP LSRDEQSVDNANSLNRNIRAKREDHPVHKRGEYSVCDSVN VVWANKTTAT DIRGNLVTVM

161VDVNINNNVYKQYFFETKCRNPNPVPTGCRGIDARHWNSYCTTTNTFVKAALTMEGNQASWRREFIRIDSACV CVISRKNENF

241G

213

Supporting Peptides:

| Peptide                  | Uniq | -10lgP | Mass      | Length | ppm | m/z      | z | RT    | Fraction | Scan     | Source File               | Area F1 | Area F2 | Area F3  |
|--------------------------|------|--------|-----------|--------|-----|----------|---|-------|----------|----------|---------------------------|---------|---------|----------|
| K.ALTMEGNQASWR.F         | N    | 80.22  | 1362.6350 | 12     | 0.4 | 682.3251 | 2 | 38.77 | 5        | F5:10781 | 17112021_RID_2349_DP5.raw |         |         | 4.2979E5 |
| K.ALTM(+15.99)EGNQASWR.F | N    | 77.11  | 1378.6299 | 12     | 0.1 | 690.3223 | 2 | 36.09 | 5        | F5:10910 | 17112021_RID_2349_DP5.raw |         |         |          |
| R.NPNPVPTGC(+57.02)R.G   | Y    | 58.52  | 1110.5240 | 10     | 0.3 | 556.2695 | 2 | 23.20 | 5        | F5:5451  | 17112021_RID_2349_DP5.raw |         |         |          |
| K.QYFFETK.C              | N    | 55.57  | 961.4545  | 7      | 0.5 | 481.7347 | 2 | 40.77 | 5        | F5:11527 | 17112021_RID_2349_DP5.raw |         |         |          |

JAS04866.1

[back to list](#)

[| Protein Coverage](#) | [Supporting Peptides](#) |

Protein Coverage:

1MSMLCYTLIIAFLIGIWAAPKSEDNVPLGSPATSDLSDTSCAKTHEALKTSRNTDQHYPAPKKAEDQEFQSAANIIVDPK

81LFQKRRFQSPRVLFSTQPPP LSRDEQSVDNANSFNRNIRAKREDHPVHKRGEYSVCDSVN VVWANKTTAT DIRGNLVTVM

161VDVNINNNVYKQYFFETKCRNPNPVPTGCRGIDARHWNSYCTTTNTFVKAALTMEGNQASWRREFIRIDSACV CVISRKNENF

241G

213

Supporting Peptides:

| Peptide                  | Uniq | -10lgP | Mass      | Length | ppm | m/z      | z | RT    | Fraction | Scan     | Source File               | Area F1 | Area F2 | Area F3  |
|--------------------------|------|--------|-----------|--------|-----|----------|---|-------|----------|----------|---------------------------|---------|---------|----------|
| K.ALTMEGNQASWR.F         | N    | 80.22  | 1362.6350 | 12     | 0.4 | 682.3251 | 2 | 38.77 | 5        | F5:10781 | 17112021_RID_2349_DP5.raw |         |         | 4.2979E5 |
| K.ALTM(+15.99)EGNQASWR.F | N    | 77.11  | 1378.6299 | 12     | 0.1 | 690.3223 | 2 | 36.09 | 5        | F5:10910 | 17112021_RID_2349_DP5.raw |         |         |          |
| R.NPNPVPTGC(+57.02)R.G   | Y    | 58.52  | 1110.5240 | 10     | 0.3 | 556.2695 | 2 | 23.20 | 5        | F5:5451  | 17112021_RID_2349_DP5.raw |         |         |          |
| K.QYFFETK.C              | N    | 55.57  | 961.4545  | 7      | 0.5 | 481.7347 | 2 | 40.77 | 5        | F5:11527 | 17112021_RID_2349_DP5.raw |         |         |          |

JAG43651.1

[back to list](#)

[| Protein Coverage](#) | [Supporting Peptides](#) |

Protein Coverage:

1MSMLCYTLIIAFLIGIWAAPKSEDNVPLGSPATSDLSDTSCAKTHEALKTSRNTDQHYPAPKKAEDQEFQSAANIIVDPK

81LFQKRRFQSPRVLFSTQPPP LSRDEQSVDNANSFNRNIRAKREDHPVHKRGEYSVCDSVN VVWANKTTAT DIRGNLVTVM

161VDVNINNNVYKQYFFETKCRNPNPVPTGCRGIDARHWNSYCTTTNTFVKALTMEGNQASWRREFIRIDSACV CVISRKNENF

241G

213

Supporting Peptides:

| Peptide                  | Uniq | -10lgP | Mass      | Length | ppm | m/z      | z | RT    | Fraction | Scan     | Source File               | Area F1 | Area F2 | Area F3  |
|--------------------------|------|--------|-----------|--------|-----|----------|---|-------|----------|----------|---------------------------|---------|---------|----------|
| K.ALTMEGNQASWR.F         | N    | 80.22  | 1362.6350 | 12     | 0.4 | 682.3251 | 2 | 38.77 | 5        | F5:10781 | 17112021_RID_2349_DP5.raw |         |         | 4.2979E5 |
| K.ALTM(+15.99)EGNQASWR.F | N    | 77.11  | 1378.6299 | 12     | 0.1 | 690.3223 | 2 | 36.09 | 5        | F5:10910 | 17112021_RID_2349_DP5.raw |         |         |          |
| R.NPNPVPTGC(+57.02)R.G   | Y    | 58.52  | 1110.5240 | 10     | 0.3 | 556.2695 | 2 | 23.20 | 5        | F5:5451  | 17112021_RID_2349_DP5.raw |         |         |          |
| K.QYFFETK.C              | N    | 55.57  | 961.4545  | 7      | 0.5 | 481.7347 | 2 | 40.77 | 5        | F5:11527 | 17112021_RID_2349_DP5.raw |         |         |          |

JAV48424.1  
[back to list](#)

[Protein Coverage](#) | [Supporting Peptides](#) |

Protein Coverage:

1MSMLCYTLIIAFLIGIWAAPKSEDNVPLGSPATSDLSDTSCAKTHEALKTSRNTDQHYPAPKKAEDQEFQSAANIIVDPK

81LFQKRRFQSPRVLFSTQPPP LSRDEQSVDNANSLNRNIRAKREDHPVHKRGEYSVCDSVN VVWANKTTAT DIRGNLVTVM

161VDVNINNNVYKQYFFETKCRNPNPVPTGCRGIDARHWNSYCTTTNTFVKALTMEGNQASWRREFIRIDSACV CVISRKNENF

241G

213

Supporting Peptides:

| Peptide                  | Uniq | -10lgP | Mass      | Length | ppm | m/z      | z | RT    | Fraction | Scan     | Source File               | Area F1 | Area F2 | Area F3  |
|--------------------------|------|--------|-----------|--------|-----|----------|---|-------|----------|----------|---------------------------|---------|---------|----------|
| K.ALTMEGNQASWR.F         | N    | 80.22  | 1362.6350 | 12     | 0.4 | 682.3251 | 2 | 38.77 | 5        | F5:10781 | 17112021_RID_2349_DP5.raw |         |         | 4.2979E5 |
| K.ALTM(+15.99)EGNQASWR.F | N    | 77.11  | 1378.6299 | 12     | 0.1 | 690.3223 | 2 | 36.09 | 5        | F5:10910 | 17112021_RID_2349_DP5.raw |         |         |          |
| R.NPNPVPTGC(+57.02)R.G   | Y    | 58.52  | 1110.5240 | 10     | 0.3 | 556.2695 | 2 | 23.20 | 5        | F5:5451  | 17112021_RID_2349_DP5.raw |         |         |          |
| K.QYFFETK.C              | N    | 55.57  | 961.4545  | 7      | 0.5 | 481.7347 | 2 | 40.77 | 5        | F5:11527 | 17112021_RID_2349_DP5.raw |         |         |          |

JAG46132.1  
[back to list](#)

[Protein Coverage](#) | [Supporting Peptides](#) |

Protein Coverage:

1MSMLCYTLIIAFLIGIWAAPKSEDNVPLGSPATSDLSDTSCAKTHEALKTSRNTDQHYPAPKKAEDQEFQSAANIIVDPK

81LFQKRRFQSPRVLFSTQPPP LSRDEQSVDNANSFNRNIRAKREDHPVHKRGEYSVCDSVN VVWANKTTAT DIRGNLVTVM

161VDVNINNNVYKQYFFETKCRNPNPVPTGCRGIDARHWNSYCTTTNTFVKALTMEGNQASWRREFIRIDSACV CVISRKNENF

241G

213

Supporting Peptides:

| Peptide                  | Uniq | -10lgP | Mass      | Length | ppm | m/z      | z | RT    | Fraction | Scan     | Source File               | Area F1 | Area F2 | Area F3  |
|--------------------------|------|--------|-----------|--------|-----|----------|---|-------|----------|----------|---------------------------|---------|---------|----------|
| K.ALTMEGNQASWR.F         | N    | 80.22  | 1362.6350 | 12     | 0.4 | 682.3251 | 2 | 38.77 | 5        | F5:10781 | 17112021_RID_2349_DP5.raw |         |         | 4.2979E5 |
| K.ALTM(+15.99)EGNQASWR.F | N    | 77.11  | 1378.6299 | 12     | 0.1 | 690.3223 | 2 | 36.09 | 5        | F5:10910 | 17112021_RID_2349_DP5.raw |         |         |          |
| R.NPNPVPTGC(+57.02)R.G   | Y    | 58.52  | 1110.5240 | 10     | 0.3 | 556.2695 | 2 | 23.20 | 5        | F5:5451  | 17112021_RID_2349_DP5.raw |         |         |          |
| K.QYFFETK.C              | N    | 55.57  | 961.4545  | 7      | 0.5 | 481.7347 | 2 | 40.77 | 5        | F5:11527 | 17112021_RID_2349_DP5.raw |         |         |          |

JAA97946.1  
[back to list](#)

[Protein Coverage](#) | [Supporting Peptides](#) |

Protein Coverage:

1MSMLCYTLIIAFLIGIWAAPKSEDNVPLGSPATSDLSDTSYAKTHEALKTSRNTDQHYPAPKKAEDQEFGSAANIIVDPK

81LFQKRRFQSPRVLFSTQPPP LSRDEQSVDNANSLNRNIRAKREDHPVHKRGEYSVCDSNVVWANKTTATDIRGNLVTVM

161VDVNINNNVYKQYFFETKCRNPNPVPTGCRGIDARHWNSYCTTTNTFVKALTMEGNQASWRFRIFIRIDSACVVISRKNEF

241G

213

Supporting Peptides:

| Peptide                 | Uniq | -10lgP | Mass      | Length | ppm | m/z      | z | RT    | Fraction | Scan     | Source File               | Area F1 | Area F2 | Area F3  |
|-------------------------|------|--------|-----------|--------|-----|----------|---|-------|----------|----------|---------------------------|---------|---------|----------|
| K.ALTMEGNQASWR.F        | N    | 80.22  | 1362.6350 | 12     | 0.4 | 682.3251 | 2 | 38.77 | 5        | F5:10781 | 17112021_RID_2349_DP5.raw |         |         | 4.2979E5 |
| K.ALM(+15.99)EGNQASWR.F | N    | 77.11  | 1378.6299 | 12     | 0.1 | 690.3223 | 2 | 36.09 | 5        | F5:10910 | 17112021_RID_2349_DP5.raw |         |         |          |
| R.NPNPVPTGC(+57.02)R.G  | Y    | 58.52  | 1110.5240 | 10     | 0.3 | 556.2695 | 2 | 23.20 | 5        | F5:5451  | 17112021_RID_2349_DP5.raw |         |         |          |
| K.QYFFETK.C             | N    | 55.57  | 961.4545  | 7      | 0.5 | 481.7347 | 2 | 40.77 | 5        | F5:11527 | 17112021_RID_2349_DP5.raw |         |         |          |

BAP39981.1  
[back to list](#)

[Protein Coverage](#) | [Supporting Peptides](#) |

Protein Coverage:

1NQYRGGAVLQATSTDCQLPVVQQFDPDWLQVDSAFHPSLENLALLENIKVHVSMSMLCYTLIIAFLIGIWAAPKSEDNVPL

81GSPATSDLSDTSCAKTHEALKTSRNTDQHYHYPAPKKAEDQEQEFGSAANIIIVDPKLFQKRRFQSPRVLFSTQPPPLSRDEQSV

161DNANSLNRNIRAKREDHPVHNRGEYSVCDSVSVWVWANKTTATDIRGNLVTVMVDVNLNNNVYKQYFFETKCRNPNPVPTG

241CRGIDSRHWNWNSYCTTTHTFVFKALTMEGNQASWRFRIFIRIDTAACVCVISRKNEFNF

285

Supporting Peptides:

| Peptide                 | Uniq | -10lgP | Mass      | Length | ppm | m/z      | z | RT    | Fraction | Scan     | Source File               | Area F1 | Area F2 | Area F3  |
|-------------------------|------|--------|-----------|--------|-----|----------|---|-------|----------|----------|---------------------------|---------|---------|----------|
| R.ALTMEGNQASWR.F        | N    | 80.22  | 1362.6350 | 12     | 0.4 | 682.3251 | 2 | 38.77 | 5        | F5:10781 | 17112021_RID_2349_DP5.raw |         |         | 4.2979E5 |
| R.ALM(+15.99)EGNQASWR.F | N    | 77.11  | 1378.6299 | 12     | 0.1 | 690.3223 | 2 | 36.09 | 5        | F5:10910 | 17112021_RID_2349_DP5.raw |         |         |          |
| R.NPNPVPTGC(+57.02)R.G  | Y    | 58.52  | 1110.5240 | 10     | 0.3 | 556.2695 | 2 | 23.20 | 5        | F5:5451  | 17112021_RID_2349_DP5.raw |         |         |          |
| K.QYFFETK.C             | N    | 55.57  | 961.4545  | 7      | 0.5 | 481.7347 | 2 | 40.77 | 5        | F5:11527 | 17112021_RID_2349_DP5.raw |         |         |          |

BAN82142.1  
[back to list](#)

[Protein Coverage](#) | [Supporting Peptides](#) |

Protein Coverage:

1MGNNQYRGGAVLQATSTDCQLPVVQQFDPDWLQVDSAFHPSLENLALLENIKVHVSMSMLCYTLIIAFLIGIWAAPKSEDNV

81PLGSPATSDLSDTSCAKTYEALKTSRNTDQHYPAPKKAEDQEFGSAANIIIVDPKLFQKRRFQSPRVLFSTQPPPLSRDEQ

161SVDNANSLNRNIRAKREDHPVHNRGEYSVCDSVNVWVWANKTTATDIRGNLVTVMVDVNLNNNVYKQYFFE TKCRNPNPVPTG

241TGCRGIDSRHWNSYCTTTHTFVKALTMEGNQASWRFRIFIRIDTAACVCVISRKNEFNF

287

Supporting Peptides:

| Peptide                 | Uniq | -10lgP | Mass      | Length | ppm | m/z      | z | RT    | Fraction | Scan     | Source File               | Area F1 | Area F2 | Area F3  |
|-------------------------|------|--------|-----------|--------|-----|----------|---|-------|----------|----------|---------------------------|---------|---------|----------|
| K.ALTMEGNQASWR.F        | N    | 80.22  | 1362.6350 | 12     | 0.4 | 682.3251 | 2 | 38.77 | 5        | F5:10781 | 17112021_RID_2349_DP5.raw |         |         | 4.2979E5 |
| K.ALM(+15.99)EGNQASWR.F | N    | 77.11  | 1378.6299 | 12     | 0.1 | 690.3223 | 2 | 36.09 | 5        | F5:10910 | 17112021_RID_2349_DP5.raw |         |         |          |
| R.NPNPVPTGC(+57.02)R.G  | Y    | 58.52  | 1110.5240 | 10     | 0.3 | 556.2695 | 2 | 23.20 | 5        | F5:5451  | 17112021_RID_2349_DP5.raw |         |         |          |
| K.QYFFETK.C             | N    | 55.57  | 961.4545  | 7      | 0.5 | 481.7347 | 2 | 40.77 | 5        | F5:11527 | 17112021_RID_2349_DP5.raw |         |         |          |

CAP74088.1  
[back to list](#)

[Protein Coverage](#) | [Supporting Peptides](#) |

Protein Coverage:

8/2/22, 12:12 PM

proteins

1 GNVDFDSESP RKPEIQNEII DLHNSLRRSV NPTASNMLKM EWYPEAAAANA ERWAFRCILS HSPRDSRVIG GIKCGENIYM

81 STSPMKWTAI IHKWHGEEKD FVYGQASPA NAVVGHYTQI VVYKSYRSGC AAAYCPSEY KYFYVCQYCP AGNMQOKTAT

161 PYTSGPPCGD CPSACDNLG TNPCTHEDKF TNCKDLVKQG CNNNYLKTNC PASCSCSCHNEI I

Supporting Peptides:

| Peptide                    | Uniq | -10lgP | Mass      | Length | ppm  | m/z      | z | RT    | Fraction | Scan     | Source File               | Area F1 | Area F2 | Area F3 | Area F4 |
|----------------------------|------|--------|-----------|--------|------|----------|---|-------|----------|----------|---------------------------|---------|---------|---------|---------|
| K.MEWYPEAAAANAER.W         | N    | 85.56  | 1536.6667 | 13     | 0.5  | 769.3411 | 2 | 45.12 | 7        | F7:13118 | 17112021_RID_2349_DP7.raw |         |         |         | 4       |
| K.M(+15.99)EWYPEAAAANAER.W | N    | 83.36  | 1552.6616 | 13     | 0.4  | 777.3384 | 2 | 40.79 | 7        | F7:11501 | 17112021_RID_2349_DP7.raw |         |         |         | 1       |
| R.SVNPTASNMLK.M            | N    | 53.18  | 1160.5859 | 11     | 0.3  | 581.3004 | 2 | 32.34 | 4        | F4:8661  | 17112021_RID_2349_DP4.raw |         |         |         | 1       |
| R.SVNPTASN(+15.99)LK.M     | N    | 48.77  | 1176.5808 | 11     | 0.8  | 589.2982 | 2 | 24.27 | 4        | F4:5833  | 17112021_RID_2349_DP4.raw |         |         |         | 9       |
| K.WTAIIHK.W                | Y    | 45.59  | 867.4966  | 7      | -0.1 | 434.7556 | 2 | 29.95 | 7        | F7:7835  | 17112021_RID_2349_DP7.raw |         |         |         | 3       |

total 5 pe

ADJ67475.1  
[back to list](#)  
| [Protein Coverage](#) | [Supporting Peptides](#) |  
Protein Coverage:

1 MMQVLLVTIS LAVFPYQGSS IILESGNVND YEYVYPQKVT AMPKGAVKQP EQKYEDTMQY EFEVNGEPPV LHLEKNKILF

81 SEDYSETHYY PDGREITTNP PVEDHCYYHG HIQNDGHSSA SISACNGLKG HFKLRGEMYF IEPLKLSNNE AHAVYKYENI

161 EKEDETPKMC GVTQTNWESD KPIKASQLV STSAQFNKAF IELIIIIVDHS MAKKNSTAT NTKIYEIVNS ANEIFNPLNI

241 HVTLLIGVEFW CDRDLINVT SADETLDSFG EWRASDLMT R KSHDNALLFT DMRFDLNTLG ITFLAGMCQA YRSVGIVQVQ

321 GNRNFKTAVI MAHELSHNLG MYHDGKNCIC NDSSCVMSPV LSDQPSKLF S NCSIHDYQRY LTRYKPKCIL YPPLRKDIVS

401 PFVCGNEIWE EGEECDGSP ADCQNPPCDA ATCKLKPGAE CGNGLCCYQC KIKTAGTVCR RARNECDVPE HCTGQSAECP

481 RDQLQONGQP CQNNRGYCYN GDCPIMRNQC ISLFGSRATV AKDSCFQENL KGSYYGYCRK ENGRKIPCAP QDVKCGRLFC

561 LNNSPRNKNP CNMHYSCMDQ HKGMVDPGTR CEDGKVCNNK RQCVDVNTAY QSTTGFSQI

Supporting Peptides:

| Peptide          | Uniq | -10lgP | Mass      | Length | ppm | m/z      | z | RT    | Fraction | Scan     | Source File               | Area F1  | Area F2  | Area F3 | Area F4 |
|------------------|------|--------|-----------|--------|-----|----------|---|-------|----------|----------|---------------------------|----------|----------|---------|---------|
| R.SVGIVQVQGNR.N  | N    | 67.43  | 1155.6360 | 11     | 0.4 | 578.8255 | 2 | 32.21 | 1        | F1:9249  | 12112021_RID_2349_DP1.raw | 4.3558E5 | 7.7637E4 |         |         |
| A.SQLVSTSAQFNK.A | Y    | 53.22  | 1308.6674 | 12     | 1.0 | 655.3416 | 2 | 32.83 | 7        | F7:8869  | 17112021_RID_2349_DP7.raw |          |          |         |         |
| E.TLDSFGEWR.A    | N    | 52.86  | 1109.5142 | 9      | 0.7 | 555.7648 | 2 | 47.54 | 2        | F2:13529 | 12112021_RID_2349_DP2.raw |          | 8.0796E4 |         |         |

total 3 peptides

XP\_034278116.1  
[back to list](#)  
| [Protein Coverage](#) | [Supporting Peptides](#) |  
Protein Coverage:

1 MCPRLVTSLL GLVLGINVCA GFTAHRVRRS GEFGEEGPDS VLSDSPWIST YGSKNRCFE LDEAEPPVCR CDNLCSSYSS

81 CCVDFDELCL KTAGGWECKT ERCGETRNE D HACHCEDCL ARGDCCSNYQ VVCKGDTWPV MDDCEDIRTP VCPAGFLHPP

161 LIIFSVDGFR ASYMKKGEKV MRNIEKLRS C GTHAPYMRPV YPTKTFPNLY TLATGLYPES HGIIGNSMYD PVFDAIFNLR

241 GREKFNRWW GGQPIWITAA KQGVKAGTFF WSNVIPYERR ILTILQWLTL ADNERVYTRP YAYAFYSQDP DMAGHRYGPF

321 SSEMLGPLRD IDKILGQLMD GLKQLNLHRC ANIIFVGDHG MEDVTCERTE YLSNYLSNVD DITLIPGTLG RIRAKANSNV

401 KFDPKAIVAN LTCKKPDQHF KPYLKQHLPK RLHYANNRRI EDIHLLVERR WHVAKRPGDV FKKITGKCYF HGDHGYDNKI

481 NSMQTVFLGY GPSFKYKTKV PPFENIELYN LMCDDLGLKP APNNGTHGSL NHLLRSSTYR PTMPPEVARP LHPVATTSS

561 DYDLGCSCDD KNRLDELSRR PYSKGTEART YTGGEFGFTN DPENVLPEDG CVPPPEKHL L YGRPAVLFR I KYSLLHHHDF

641 ESGYSETFQM PLWTSYTISK QAETSGVPDQ VISCVRPDLR ISPSNSQSCT AYRVRQMSY GFLFPPQLSS SVETKYDAFL

721 ITNVIPMYPA FKKVWNYFQR ILVKRYAIER NGVNVISGPI FDYDFDGLHD TPDKIKLYVE GSSIPVPTHY YSIITSCLDF

801 TQPADKCDGP LSVLAYIFPH RPDNDESCNN SSEDESRWE ELLKMHTARV RDIEQITGLD FYRKTSRSYS EILSLKTYLH

881 TFESEI

Supporting Peptides:

| Peptide          | Uniq | -10lgP | Mass      | Length | ppm | m/z      | z | RT    | Fraction | Scan     | Source File               | Area F1 | Area F2 | Area F3  | Area F4 |
|------------------|------|--------|-----------|--------|-----|----------|---|-------|----------|----------|---------------------------|---------|---------|----------|---------|
| R.DIEQITGLDFYR.K | Y    | 62.33  | 1468.7197 | 12     | 1.2 | 735.3680 | 2 | 63.03 | 3        | F3:18811 | 17112021_RID_2349_DP3.raw |         |         | 1.9643E5 | 5       |

total 5 peptides

| Peptide               | Uniq | -10lgP | Mass      | Length | ppm  | m/z       | z | RT    | Fraction | Scan     | Source File               | Area F1 | Area F2 | Area F3  | Area F4 |
|-----------------------|------|--------|-----------|--------|------|-----------|---|-------|----------|----------|---------------------------|---------|---------|----------|---------|
| R.VRDIEQITGLDFYR.K    | Y    | 47.90  | 1723.8893 | 14     | -0.3 | 575.6368  | 3 | 54.41 | 3        | F3:16066 | 17112021_RID_2349_DP3.raw |         |         | 2.9338E5 |         |
| K.VWNYFQR.I           | Y    | 44.68  | 1011.4926 | 7      | 0.6  | 506.7539  | 2 | 44.05 | 4        | F4:12592 | 17112021_RID_2349_DP4.raw |         |         | 5.0789E5 | 7       |
| K.TYLHTFESEI          | Y    | 43.72  | 1238.5819 | 10     | 0.0  | 620.2982  | 2 | 49.94 | 3        | F3:14629 | 17112021_RID_2349_DP3.raw |         |         | 1.7866E6 |         |
| K.YDAFLITNVIPMYPAFK.K | Y    | 43.12  | 2002.0273 | 17     | 1.4  | 1002.0223 | 2 | 75.89 | 3        | F3:22897 | 17112021_RID_2349_DP3.raw |         |         | 1.7377E5 |         |
| total 5 peptides      |      |        |           |        |      |           |   |       |          |          |                           |         |         |          |         |

TRINITY\_DN12452  
[back to list](#)

[Protein Coverage](#) | [Supporting Peptides](#) |  
Protein Coverage:

|    |            |            |            |         |      |            |            |      |        |            |  |  |  |  |
|----|------------|------------|------------|---------|------|------------|------------|------|--------|------------|--|--|--|--|
| 1  | CLPGWSFYEG | NCYKAFDEPK | SWVDAEKFCQ | KQSN    | HLAS | IEGLGKANFV | AKLVSETLRE | PQIH | VWIGLR | DQSERQQCSS |  |  |  |  |
| 81 | HWTDGSAVSY | EKVVRFTKCF | GLNKKTDYRT | WVGLRCG |      |            |            |      |        |            |  |  |  |  |

Supporting Peptides:

| Peptide          | Uniq -10lgP | Mass  | Length    | ppm | m/z  | z        | RT | Fraction | Scan | Source File                       | Area F1 | Area F2 | Area F3  | Area F4  | A   |
|------------------|-------------|-------|-----------|-----|------|----------|----|----------|------|-----------------------------------|---------|---------|----------|----------|-----|
| K.HLASIEGLGK.A   | Y           | 68.91 | 1023.5713 | 10  | -0.9 | 512.7925 | 2  | 32.04    | 7    | F7:8674 17112021_RID_2349_DP7.raw |         |         | 3.0778E5 | 5.5199E5 | 2.1 |
| K.LVSETLREPQIH.V | Y           | 46.38 | 1420.7673 | 12  | 1.1  | 711.3917 | 2  | 35.06    | 6    | F6:9422 17112021_RID_2349_DP6.raw |         |         |          |          |     |
| total 2 peptides |             |       |           |     |      |          |    |          |      |                                   |         |         |          |          |     |

AUS82489.1  
[back to list](#)

[Protein Coverage](#) | [Supporting Peptides](#) |  
Protein Coverage:

|     |            |            |            |          |         |      |        |        |        |       |         |      |          |     |  |
|-----|------------|------------|------------|----------|---------|------|--------|--------|--------|-------|---------|------|----------|-----|--|
| 1   | MVLIRVLANL | LILQLSYAQK | SSELVVGDE  | CNINEHRS | LV      | VLFN | SSSFLC | AGTL   | INEEWV | LTA   | AHCD    | SKN  | FQMQLGVH | SK  |  |
| 81  | KVLNEDEQTR | DPKEKFICPN | KKKDDENDKD | IMLIR    | LDSPV   | SNSE | HIAPLS | LPSS   | PPSVGS | VCR   | IMGWGTI | TPTK | ETYPDV   |     |  |
| 161 | PRCANINILD | HAVCRAAYPW | NPVASTTLC  | A        | GTQQGGK | DT   | RGDS   | GGPLIC | NGQFQ  | GIVSW | GGHPCGQ | AHE  | PGVYTKV  | FDY |  |
| 241 | TDWISIIAG  | NTDATCPP   |            |          |         |      |        |        |        |       |         |      |          |     |  |

Supporting Peptides:

| Peptide              | Uniq -10lgP | Mass  | Length    | ppm | m/z  | z        | RT | Fraction | Scan | Source File                        | Area F1 | Area F2 | Area F3  | Area F4 | F |
|----------------------|-------------|-------|-----------|-----|------|----------|----|----------|------|------------------------------------|---------|---------|----------|---------|---|
| K.VLNEDEQTR.D        | N           | 63.83 | 1102.5254 | 9   | 0.5  | 552.2703 | 2  | 19.87    | 4    | F4:4313 17112021_RID_2349_DP4.raw  |         |         | 2.2851E5 | 9.6629E |   |
| K.KVLNEDEQTR.D       | N           | 55.31 | 1230.6204 | 10  | 0.8  | 616.3179 | 2  | 16.73    | 4    | F4:3273 17112021_RID_2349_DP4.raw  |         |         | 2.4946E4 | 2.7539E |   |
| R.IMGWGTITPTK.E      | Y           | 45.91 | 1203.6322 | 11  | 1.2  | 602.8241 | 2  | 49.08    | 4    | F4:14280 17112021_RID_2349_DP4.raw |         |         |          | 1.0911E |   |
| N.DKDIMLIR.L         | N           | 44.22 | 1002.5532 | 8   | -0.5 | 502.2836 | 2  | 37.38    | 3    | F3:10341 17112021_RID_2349_DP3.raw |         |         | 5.8616E6 |         |   |
| N.DKDIM(+15.99)LIR.L | N           | 39.37 | 1018.5481 | 8   | 0.3  | 510.2815 | 2  | 31.54    | 3    | F3:8358 17112021_RID_2349_DP3.raw  |         |         | 1.7097E6 |         |   |
| total 5 peptides     |             |       |           |     |      |          |    |          |      |                                    |         |         |          |         |   |

JAA98031.1  
[back to list](#)

[Protein Coverage](#) | [Supporting Peptides](#) |  
Protein Coverage:

|     |            |            |            |          |         |      |        |       |        |       |         |      |          |     |  |
|-----|------------|------------|------------|----------|---------|------|--------|-------|--------|-------|---------|------|----------|-----|--|
| 1   | MVLIRVLAHL | LILQLSYAQK | SSELVVGHP  | CNINEHRS | LV      | VLFN | SSGFLC | AGTL  | INEEWV | LTA   | AHCD    | SKN  | FQMQLGVH | SK  |  |
| 81  | KVLNEDEQTR | DPKEKFICPN | KKKDDENDKD | IMLIR    | LDSPV   | SNSE | HIAPLS | LPSS  | PPSVGS | VCR   | IMGWGTI | TPTK | ETYPDV   |     |  |
| 161 | PHCANINILD | HAVCRAAYPW | NPVASTTLC  | A        | GTQQGGK | DT   | RADSGG | GPLIC | NGEIQ  | GIVSW | GGHPCGQ | ARE  | PGVYTKV  | FDY |  |
| 241 | TDWISIIAG  | KKTVCNCP   |            |          |         |      |        |       |        |       |         |      |          |     |  |

Supporting Peptides:

| Peptide          | Uniq -10lgP | Mass  | Length    | ppm | m/z  | z        | RT | Fraction | Scan | Source File                        | Area F1 | Area F2 | Area F3  | Area F4 | F |
|------------------|-------------|-------|-----------|-----|------|----------|----|----------|------|------------------------------------|---------|---------|----------|---------|---|
| K.VLNEDEQTR.D    | N           | 63.83 | 1102.5254 | 9   | 0.5  | 552.2703 | 2  | 19.87    | 4    | F4:4313 17112021_RID_2349_DP4.raw  |         |         | 2.2851E5 | 9.6629E |   |
| K.KVLNEDEQTR.D   | N           | 55.31 | 1230.6204 | 10  | 0.8  | 616.3179 | 2  | 16.73    | 4    | F4:3273 17112021_RID_2349_DP4.raw  |         |         | 2.4946E4 | 2.7539E |   |
| R.IMGWGTITPTK.E  | Y           | 45.91 | 1203.6322 | 11  | 1.2  | 602.8241 | 2  | 49.08    | 4    | F4:14280 17112021_RID_2349_DP4.raw |         |         |          | 1.0911E |   |
| K.DKDIMLIR.L     | N           | 44.22 | 1002.5532 | 8   | -0.5 | 502.2836 | 2  | 37.38    | 3    | F3:10341 17112021_RID_2349_DP3.raw |         |         | 5.8616E6 |         |   |
| total 5 peptides |             |       |           |     |      |          |    |          |      |                                    |         |         |          |         |   |

| Peptide                | Uniq  | -10lgP    | Mass | Length | ppm      | m/z | z     | RT | Fraction | Scan                      | Source File | Area F1 | Area F2 | Area F3  | Area F4 |
|------------------------|-------|-----------|------|--------|----------|-----|-------|----|----------|---------------------------|-------------|---------|---------|----------|---------|
| K.DKDIM(+15.99)LIR.L N | 39.37 | 1018.5481 | 8    | 0.3    | 510.2815 | 2   | 31.54 | 3  | F3:8358  | 17112021_RID_2349_DP3.raw |             |         |         | 1.7097E6 |         |
| total 5 peptides       |       |           |      |        |          |     |       |    |          |                           |             |         |         |          |         |

TRINITY\_DN471

[back to list](#)

| [Protein Coverage](#) | [Supporting Peptides](#) |

Protein Coverage:

1

INVTSAANVT LK**SFGEWRER** DLLSRKRHDN AQLLTDIDFD GPTIGMAHMF SMCHSER**SVG IIQDYSPIDR** VVATIMAHM

81

GHNLGLNHDE KQCNCGANSC IMSAVLSDP

Supporting Peptides:

| Peptide             | Uniq -10lgP | Mass      | Length | ppm | m/z      | z | RT    | Fraction | Scan     | Source File               | Area F1  | Area F2  | Area F3  | Area F4 |
|---------------------|-------------|-----------|--------|-----|----------|---|-------|----------|----------|---------------------------|----------|----------|----------|---------|
| R.SVGIIQDYSPIDR.V Y | 83.80       | 1461.7463 | 13     | 0.4 | 731.8807 | 2 | 48.90 | 2        | F2:13984 | 12112021_RID_2349_DP2.raw | 1.3286E6 | 4.833E6  | 1.0924E7 | 2       |
| K.SFGEWRER.D N      | 55.07       | 1065.4991 | 8      | 0.1 | 533.7569 | 2 | 31.26 | 2        | F2:7954  | 12112021_RID_2349_DP2.raw | 6.0265E6 | 2.4122E6 |          |         |
| total 2 peptides    |             |           |        |     |          |   |       |          |          |                           |          |          |          |         |

ADN04917.1

[back to list](#)

| [Protein Coverage](#) | [Supporting Peptides](#) |

Protein Coverage:

1

MVLIRVLANL LLLQLSHAQK SSELVVGDE CNINEHRSLV FLYNSSFGCG GTLINQEWVL SAAHCDMENM RIYLGWHNFS

81

LPNMNQKRRV AKEKFFCLSS KNYTE**WDKDI MLIK**MNRPVT YSTHVAPLSL PSSPPSVGSGV CRIMGWGAIT SPNETYPDVP

161

HCANINILNY TVCR**AAHPWL PAQSR**TLCAG ILQGGIDTCK GDSGGPLICN GQIQGIWSWG DNPCAQPLKP GHYTNVFDYT

241

DWIQSIIAGN TTATCPP

Supporting Peptides:

| Peptide               | Uniq | -10lgP | Mass      | Length | ppm  | m/z      | z | RT    | Fraction | Scan     | Source File               | Area F1  | Area F2  | Area F3  |
|-----------------------|------|--------|-----------|--------|------|----------|---|-------|----------|----------|---------------------------|----------|----------|----------|
| R.AAHPWLPAQSR.T       | Y    | 82.07  | 1232.6414 | 11     | -1.1 | 617.3273 | 2 | 33.26 | 1        | F1:9553  | 12112021_RID_2349_DP1.raw | 6.4186E7 | 1.0631E7 | 3.0723E6 |
| E.WDKDIMLIK.M         | N    | 57.12  | 1160.6263 | 9      | -0.1 | 581.3204 | 2 | 46.64 | 2        | F2:13338 | 12112021_RID_2349_DP2.raw | 2.1169E5 | 9.915E6  | 1.5104E6 |
| E.WDKDIM(+15.99)LIK.M | N    | 52.20  | 1176.6212 | 9      | -0.2 | 589.3177 | 2 | 41.27 | 2        | F2:11445 | 12112021_RID_2349_DP2.raw |          | 6.6323E6 | 2.1157E6 |
| total 3 peptides      |      |        |           |        |      |          |   |       |          |          |                           |          |          |          |

E0Y419.1

[back to list](#)

| [Protein Coverage](#) | [Supporting Peptides](#) |

Protein Coverage:

1

MVLIRVLANL LLLQLSHAQK SSELVVGDE CNINEHRSLV FLYNSSFGCG GTLINQEWVL SAAHCDMENM RIYLGWHNFS

81

LPNMNQKRRV AKEKFFCLSS KNYTE**WDKDI MLIK**MNRPVT YSTHVAPLSL PSSPPSVGSGV CRIMGWGAIT SPNETYPDVP

161

HCANINILNY TVCR**AAHPWL PAQSR**TLCAG ILQGGIDTCK GDSGGPLICN GQIQGIWSWG DNPCAQPLKP GHYTNVFDYT

241

DWIQSIIAGN TTATCPP

Supporting Peptides:

| Peptide               | Uniq | -10lgP | Mass      | Length | ppm  | m/z      | z | RT    | Fraction | Scan     | Source File               | Area F1  | Area F2  | Area F3  |
|-----------------------|------|--------|-----------|--------|------|----------|---|-------|----------|----------|---------------------------|----------|----------|----------|
| R.AAHPWLPAQSR.T       | Y    | 82.07  | 1232.6414 | 11     | -1.1 | 617.3273 | 2 | 33.26 | 1        | F1:9553  | 12112021_RID_2349_DP1.raw | 6.4186E7 | 1.0631E7 | 3.0723E7 |
| E.WDKDIMLIK.M         | N    | 57.12  | 1160.6263 | 9      | -0.1 | 581.3204 | 2 | 46.64 | 2        | F2:13338 | 12112021_RID_2349_DP2.raw | 2.1169E5 | 9.915E6  | 1.5104E7 |
| E.WDKDIM(+15.99)LIK.M | N    | 52.20  | 1176.6212 | 9      | -0.2 | 589.3177 | 2 | 41.27 | 2        | F2:11445 | 12112021_RID_2349_DP2.raw |          | 6.6323E6 | 2.1157E7 |
| total 3 peptides      |      |        |           |        |      |          |   |       |          |          |                           |          |          |          |

AEH59582.1

[back to list](#)

| [Protein Coverage](#) | [Supporting Peptides](#) |

Protein Coverage:

1MSMLCYTLIIAFLIGIWAAPKSEDNVSLGSLATPDLSDTSCAKTHEALKTSRNTDQHYPAPKKAEDQEFGSAANIIVDPK

81LFQKRRFQSPRVLFSTQPPP LSRDEQSMELDNADSLNRNIRAKRGTHPVHNRGEFSVCD SVSVWVANKT TATDIRGNV

161TVMVDVNLNN NVYRQYFFET KCKNPNVPVSGCRGIDAKHW NSYCTTTDTF VRALTMEGNQ ASWRFIRIDT ACVCVISRKN

218

241 DNL

Supporting Peptides:

| Peptide                  | Uniq | -10lgP | Mass      | Length | ppm | m/z      | z | RT    | Fraction | Scan     | Source File               | Area F1 | Area F2 | Area F3  |
|--------------------------|------|--------|-----------|--------|-----|----------|---|-------|----------|----------|---------------------------|---------|---------|----------|
| R.ALTMEGNQASWR.F         | N    | 80.22  | 1362.6350 | 12     | 0.4 | 682.3251 | 2 | 38.77 | 5        | F5:10781 | 17112021_RID_2349_DP5.raw |         |         | 4.2979E5 |
| R.ALTM(+15.99)EGNQASWR.F | N    | 77.11  | 1378.6299 | 12     | 0.1 | 690.3223 | 2 | 36.09 | 5        | F5:10910 | 17112021_RID_2349_DP5.raw |         |         |          |
| R.QYFFETK.C              | N    | 55.57  | 961.4545  | 7      | 0.5 | 481.7347 | 2 | 40.77 | 5        | F5:11527 | 17112021_RID_2349_DP5.raw |         |         |          |
| M.VDVNLNNNVYR.Q          | Y    | 38.71  | 1318.6630 | 11     | 1.1 | 660.3395 | 2 | 37.96 | 5        | F5:10607 | 17112021_RID_2349_DP5.raw |         |         |          |

total 4

QBF53420.1  
[back to list](#)

[Protein Coverage](#) | [Supporting Peptides](#) |  
Protein Coverage:

1MVHSVMSMLCYTLIIAFLIGIWAAPKSEDNVSLGSPATPDLSDTSCAKTHEALKTSRNTDQHYPAPKKAEDQEFGSAANI

81IVDPKLFQKRRFQSPRVLFSTQPPP LSRDEQSMELDNADSLNRNIRAKRGTHPVHNRGEFSVCD SVSVWVANKT TATDIRGNV

161RGNVVTVMVD VNLNNNVYRQ YFFETKCKNPNVPVSGCRGIDAKHWNSYCTTTDTFVRALTMEGNQASWRFIRIDTACV

221

Supporting Peptides:

| Peptide                  | Uniq | -10lgP | Mass      | Length | ppm | m/z      | z | RT    | Fraction | Scan     | Source File               | Area F1 | Area F2 | Area F3  |
|--------------------------|------|--------|-----------|--------|-----|----------|---|-------|----------|----------|---------------------------|---------|---------|----------|
| R.ALTMEGNQASWR.F         | N    | 80.22  | 1362.6350 | 12     | 0.4 | 682.3251 | 2 | 38.77 | 5        | F5:10781 | 17112021_RID_2349_DP5.raw |         |         | 4.2979E5 |
| R.ALTM(+15.99)EGNQASWR.F | N    | 77.11  | 1378.6299 | 12     | 0.1 | 690.3223 | 2 | 36.09 | 5        | F5:10910 | 17112021_RID_2349_DP5.raw |         |         |          |
| R.QYFFETK.C              | N    | 55.57  | 961.4545  | 7      | 0.5 | 481.7347 | 2 | 40.77 | 5        | F5:11527 | 17112021_RID_2349_DP5.raw |         |         |          |
| M.VDVNLNNNVYR.Q          | Y    | 38.71  | 1318.6630 | 11     | 1.1 | 660.3395 | 2 | 37.96 | 5        | F5:10607 | 17112021_RID_2349_DP5.raw |         |         |          |

total 4

QHR82782.1  
[back to list](#)

[Protein Coverage](#) | [Supporting Peptides](#) |  
Protein Coverage:

1MSMLCYTLIIAFLIGIWAAPKSEDNVSLGSPATPDLSDTSCAKTHEALKTSRNTDQHYPAPKKAEDQEFGSAANIIVDPK

81LFQKRRFQSPRVLFSTQPPP LSRDEQSMELDNADSLNRNIRAKRGTHPVHNRGEFSVCD SVSVWVANKT TATDIRGNV

161TVMVDVNLNN NVYRQYFFET KCKNPNVPVSGCRGIDAKHW NSYCTTTDTF VRALTMEGNQ ASWRFIRIDT ACVCVISRKN

218

241 DNLG

Supporting Peptides:

| Peptide                  | Uniq | -10lgP | Mass      | Length | ppm | m/z      | z | RT    | Fraction | Scan     | Source File               | Area F1 | Area F2 | Area F3  |
|--------------------------|------|--------|-----------|--------|-----|----------|---|-------|----------|----------|---------------------------|---------|---------|----------|
| R.ALTMEGNQASWR.F         | N    | 80.22  | 1362.6350 | 12     | 0.4 | 682.3251 | 2 | 38.77 | 5        | F5:10781 | 17112021_RID_2349_DP5.raw |         |         | 4.2979E5 |
| R.ALTM(+15.99)EGNQASWR.F | N    | 77.11  | 1378.6299 | 12     | 0.1 | 690.3223 | 2 | 36.09 | 5        | F5:10910 | 17112021_RID_2349_DP5.raw |         |         |          |
| R.QYFFETK.C              | N    | 55.57  | 961.4545  | 7      | 0.5 | 481.7347 | 2 | 40.77 | 5        | F5:11527 | 17112021_RID_2349_DP5.raw |         |         |          |
| M.VDVNLNNNVYR.Q          | Y    | 38.71  | 1318.6630 | 11     | 1.1 | 660.3395 | 2 | 37.96 | 5        | F5:10607 | 17112021_RID_2349_DP5.raw |         |         |          |

total 4

TRINITY\_DN1356  
[back to list](#)

[Protein Coverage](#) | [Supporting Peptides](#) |  
Protein Coverage:

### Supporting Peptides:

**total 4**

[back to list](#)

Protein Coverage:

Supporting Peptides:

**total 4**

[back to list](#)

Protein Coverage:

Supporting Peptides:

**total 4**

[back to list](#)

Protein Coverage:

|     |             |            |            |            |            |            |            |            |  |
|-----|-------------|------------|------------|------------|------------|------------|------------|------------|--|
| 1   | MLIRWAGGWG  | QLGKAYVKRW | EAIAPCANFV | CCQFAVSVTE | RLPERSFIKA | SHLSTLLLV  | CWSQGMVHSV | MSMLCYTLII |  |
| 81  | AFLIGIWAAP  | KSEDNVSLGS | PATPDLSDTS | CAKTHEALKT | SRNTDQHYP  | PKKAEDQEF  | SAANIIVDPK | LFQKRRFQSP |  |
| 161 | RVLFTSTQPPP | LSRDEQSLEF | LDNADSLNRN | IRAKRETHPV | HNRGEFSVCD | SVSVWVANKT | TATDIRGNV  | TVMVDVNLNN |  |
| 241 | NVYRQYFFET  | KCKNPNPVPS | GCRGIDAKHW | NSYCTTTDTF | VRALTM     | EGNQASWR   | FIRIDT     | ACVCVISRKK |  |

Supporting Peptides:

| Peptide                  | Uniq | -10lgP | Mass      | Length | ppm | m/z      | z | RT    | Fraction | Scan     | Source File               | Area F1 | Area F2 | Area F3  |
|--------------------------|------|--------|-----------|--------|-----|----------|---|-------|----------|----------|---------------------------|---------|---------|----------|
| R.ALTMEGNQASWR.F         | N    | 80.22  | 1362.6350 | 12     | 0.4 | 682.3251 | 2 | 38.77 | 5        | F5:10781 | 17112021_RID_2349_DP5.raw |         |         | 4.2979E5 |
| R.ALTM(+15.99)EGNQASWR.F | N    | 77.11  | 1378.6299 | 12     | 0.1 | 690.3223 | 2 | 36.09 | 5        | F5:10910 | 17112021_RID_2349_DP5.raw |         |         |          |
| R.QYFFETK.C              | N    | 55.57  | 961.4545  | 7      | 0.5 | 481.7347 | 2 | 40.77 | 5        | F5:11527 | 17112021_RID_2349_DP5.raw |         |         |          |
| M.VDVNLNNNVYR.Q          | Y    | 38.71  | 1318.6630 | 11     | 1.1 | 660.3395 | 2 | 37.96 | 5        | F5:10607 | 17112021_RID_2349_DP5.raw |         |         |          |

total 4

TRINITY\_DN180  
[back to list](#)

[Protein Coverage](#) | [Supporting Peptides](#) |  
Protein Coverage:

|      |              |             |            |            |             |            |            |             |            |
|------|--------------|-------------|------------|------------|-------------|------------|------------|-------------|------------|
| 1    | MSMNGSHPR    | LNTLGRMVRAE | SGPDMRYDMN | SHMMMGGGGG | GGGGSGHTHK  | MYVQKSYVG  | DVNSEGYTON | GTATVSRRQN  |            |
| 81   | TIQDLLQVCS   | DCLMR       | AELIV      | QPELK      | YGDGI       | QISRNRELEE | CFTQATEHME | MLEALIREMR  | QMGQPCELYQ |
| 161  | RALYKAISVP   | RVRASSKGG   | GYSSQSASGW | DEYTRRVTS  | CLNWMRQOKT  | EMELIKWGF  | AAAIEQQIAE | HRRFHNSIGD  |            |
| 241  | YRWHLDKVKT   | DLREKAAVHQ  | LEEEYEYLLR | FSFERMDQLR | QLQNIQATS   | REIMWINDCE | EEELLYDWS  | RNTDIARKQE  |            |
| 321  | AFSKRMSQLE   | VKEKELNKLK  | QECQDLVLSQ | HPASDKIEAY | MDTLQTQWSW  | ILQITKCIDV | HLKENAAYFQ | FFEEAQSTEN  |            |
| 401  | YLKNLQDVIR   | KRFICDKNMS  | LQVLLEQIKE | LEAEREKILE | YKRQVQNLVN  | KSKKIVQLKP | RNPEYK     | SNKP        | IILRALCDYK |
| 481  | QDLKTMRKGD   | ECILKDNSE   | SKWHVTGPGG | LDMLVPSVSL | IIPPPNPLAV  | DLATKIEQYY | DAIMALWNQL | YINMKSLVSW  |            |
| 561  | HYCLIDIEKI   | KVMTIAKLKT  | MRREDYQRII | SDLEIHQYEF | IRNSQGSSEMF | GDEDKRTMQT | RITDAQKHQY | TLVIQLPDLQ  |            |
| 641  | TQPLPPQPTI   | VTEVINIEKQ  | EAWLLMELQK | LRRQIENC   | EL          | RMVQRTPFQ  | DQGATHNLCV | RISELESIQN  | ESQSLAEILN |
| 721  | RQNDYLPNFR   | GSEKYHYLQS  | EISALFQKLE | NINGISACYL | DSLNALRSL   | L          | QAILQTDDMI | RVFEIRLTEE  | DTLSLDPDKV |
| 801  | EAYRACLKMK   | KADLSMKKSL  | LGTLEAELQK | ALQVHSQSSQ | TYPHYELDLG  | KFADRVSQLT | DRWQRLEKQL | DDRSWDLEKQ  |            |
| 881  | VKQLRIYRDL   | YQALNKWICD  | ARRRQETIEA | MKLGDVSTVM | RYLQEQKNLH  | SEVTSKRDRV | EEVIKHA    | EV          | SLAIKDYELQ |
| 961  | AAAYSSGLET   | LLNIPVKRSM  | VQSPSGLILQ | EAGEIQSRYI | ELLTRSGDYY  | KFLSEMLKSL | EDIKMKSTRI | ELLEEEELRLA |            |
| 1041 | KDANSDSNNK   | HKFLEQNLQK  | YQVECSQLKA | KFISLEEMKR | QVEMDSSTSK  | QNLDKCYAQI | KDLNDRITRL | TYEIEDEKRR  |            |
| 1121 | RKLLLEDRIEYQ | QKADFDQLQK  | TRQNEKETLG | WQKIESEKII | KEKEYELERL  | RVLLQDEGTR | KRECENELAK | VRNQFNEEMS  |            |
| 1201 | NIKNKYETEI   | NIKKTTHIQI  | AAQKEDDAKN | LRTQIDRLQR | ENRDLKDEIV  | RLNEAILD   | TT         | EQRRAEENI   | LQQKACGSEV |
| 1281 | LQQKQQIELE   | LKQIIQLRND  | DNTRYKQALE | DATSTIHEKV | KEIERLKIQL  | KEEAKSRWEL | ENELAKTSHR | IQESKNQCNH  |            |
| 1361 | VMQERETLLI   | KIKTLEQDKA  | RLRLLEEDLN | RTKGMLESES | RLKVRLENEK  | QQILNDLNQW | KSQYSRKEET | IRKTESERDK  |            |
| 1441 | SEREKSALLI   | EIERLQAEIK  | RIEERYRCRL | EETSRKSQAE | METERLRLQR  | EIEKLQRPK  | GAPRGQTTEE | DLMIDPSKLL  |            |
| 1521 | FSGLRKKITA   | VQLYECQLID  | KCTLDKLLRG | QKSVEEVAE  | LEPYLRGAGA  | IAGASLNTKV | KFSLVEAKRK | QLLTPENTVL  |            |
| 1601 | LLEAQAAATGG  | VIDPHRNELL  | SVDSAVARDL | IDFDDREQIY | MAEKAITGFK  | DPFSGKMMPV | AEAMKKNLVD | RETGLRLLEA  |            |
| 1681 | QLASGGIVDP   | INSIFLPKDI  | ALSRGLIDRD | LYRALNNPSK | PLIDPLSKVA  | ISYMKLREKC | RVEQHTGLLL | LPVQKRNTSF  |            |
| 1761 | QGIRKQISVS   | ELVESGIIRE  | STANELETGA | ITVEEVTDRI | KDFLQGSSCI  | AGIYNEATGE | KLGVYQAMKI | GLVRPGTALE  |            |
| 1841 | LLEAQAAATGF  | IVDPVNNLRL  | PVEEAYKRGL | VGIEFKEKLL | SAERAVTGYK  | DPETGNIISL | FQAMNKELIE | KHGHIR      | LLEA       |
| 1921 | QIATGGIIDP   | KESHRLPVHT  | AYQRGYFNEE | LNDILSDPSD | DTKGFFDPNT  | EENLTYLQLK | GRCKIDESTR | LCLLPLREKK  |            |
| 2001 | KVVQTSQKNT   | LRKRRVVIVD  | PDTNKEMSVQ | EAYNKGLIDY | STYMELSDQE  | CEWEEITTTG | SDGSTRVVLV | DRKTGHQYDI  |            |
| 2081 | EDALDKGLVD   | RKFFDQYRS   | SLSLTQFADM | IASRNGGDEV | FRQESIIRSP  | TVVSVKSSSI | LLKSSSGSFS | DSPEETTPIA  |            |
| 2161 | AIFDTENLEK   | ISISEAVQRG  | IVDTITAQRL | LEAQTCTGGI | LCPTTGQRLS  | LQDAVAQGII | DHEMATRLKP | AQKAFLGFEG  |            |
| 2241 | IKGRKRMSAA   | EAVKEKWL    | PEY        | EAGQRFLEFQ | FITGGLIDPE  | VHGRISTEEA | IRKGLIDGRT | SQRLQDISNY  | AKILTCPKTK |
| 2321 | LKISYREAMN   | RSMVEDQTGL  | KLLEASSVSS | KGISSPYNVS | SAPGSRSGSR  | SGSRSGSRSG | SRRG       | SFDAGT      | SSSYSYSYTA |
| 2401 | VSSNSSLGR    |             |            |            |             |            |            |             |            |

Supporting Peptides:

| Peptide             | Uniq | -10lgP | Mass      | Length | ppm | m/z      | z | RT    | Fraction | Scan     | Source File               | Area F1 | Area F2  | Area F3 | Area F4  |
|---------------------|------|--------|-----------|--------|-----|----------|---|-------|----------|----------|---------------------------|---------|----------|---------|----------|
| R.LLEAQIATGGIIDPK.E | Y    | 62.51  | 1537.8715 | 15     | 0.8 | 769.9436 | 2 | 51.54 | 6        | F6:15197 | 17112021_RID_2349_DP6.raw |         |          |         |          |
| R.LQNIHQATSR.E      | Y    | 51.48  | 1270.6993 | 11     | 0.2 | 636.3571 | 2 | 38.60 | 2        | F2:10594 | 12112021_RID_2349_DP2.raw |         | 1.0785E4 |         | 1.2228E4 |

total 4 peptides

| Peptide        | Uniq | -10lgP | Mass      | Length | ppm  | m/z      | z | RT    | Fraction | Scan     | Source File               | Area F1 | Area F2 | Area F3 | Area I |
|----------------|------|--------|-----------|--------|------|----------|---|-------|----------|----------|---------------------------|---------|---------|---------|--------|
| K.SNKPILR.A    | Y    | 44.33  | 939.5865  | 8      | -0.1 | 470.8005 | 2 | 24.97 | 6        | F6:6034  | 17112021_RID_2349_DP6.raw |         |         |         |        |
| R.AELIVQPELK.Y | Y    | 42.71  | 1138.6597 | 10     | -0.2 | 570.3370 | 2 | 43.74 | 6        | F6:12471 | 17112021_RID_2349_DP6.raw |         |         |         |        |

total 4 peptides

TRINITY\_DN180  
[back to list](#)

[Protein Coverage](#) | [Supporting Peptides](#) |  
Protein Coverage:

|      |             |            |                    |            |                   |             |            |                    |            |  |  |  |  |  |  |
|------|-------------|------------|--------------------|------------|-------------------|-------------|------------|--------------------|------------|--|--|--|--|--|--|
| 1    | MSMNGSHPR   | NTLGRMVRAE | SGPDMRYDMN         | SHMMMGGGG  | GGGSGHGH          | THK         | MYVQKSYVG  | DVNSEGYTQN         | GTATVSRRQN |  |  |  |  |  |  |
| 81   | TIQDLLQVCS  | DCLMR      | <b>AELIV QPELK</b> | YGDGI      | QISRNRELEE        | CFTQATEHME  | MLEALIREMR | QMGQPCELYQ         | KRLQLQEOM  |  |  |  |  |  |  |
| 161  | RALYKAISVP  | RVRASSKGG  | GYSSQSASGW         | DEYTRRVTS  | CLNWMRQQT         | EMELIKWGF   | AAAIEQQIAE | HRRFHNSIGD         |            |  |  |  |  |  |  |
| 241  | YRWHLDKVKT  | DLREKAAVHQ | LEEYELLR           | FSFERMDQLR | <b>QLQNIQATS</b>  | REIMWINDCE  | EEELLYDWS  | RNTDIARKQE         |            |  |  |  |  |  |  |
| 321  | AFSKRMSQLE  | VKEKELNKLK | QECQDLVLSQ         | HPASDKIEAY | MDTLQTQWS         | ILQITKCIDV  | HLKENAAYFQ | FFEEAQSTEN         |            |  |  |  |  |  |  |
| 401  | YLKNLQDVIR  | KRFICDKNMS | LQVLLEQIKE         | LEAEREKILE | YKRQVQNLVN        | KSKKIVQLKP  | RNPEYK     | <b>SNKP IILRAL</b> | CDYK       |  |  |  |  |  |  |
| 481  | QDLKTRMGD   | ECILKDNSE  | SKWHVTGPGG         | LDMLVPSVSL | IIPPNPLAV         | DLATKIEQYY  | DAIMALWNQL | YINMKSLVSW         |            |  |  |  |  |  |  |
| 561  | HYCLIDIEKI  | KVMTIAKLKT | MRREDYQRII         | SDLEIHQEF  | IRNSQGSEMF        | GDEDKRTMQT  | RITDAQKHQY | TLVIQLPDLQ         |            |  |  |  |  |  |  |
| 641  | TQPLPPQPTI  | VTEVINIEKQ | EAWLLMELQK         | LRRQIENCEL | RMVQRTPFQ         | LQDQATHNLCV | RISELESIQN | ESQSLAEILN         |            |  |  |  |  |  |  |
| 721  | RQNDYLPNFR  | GSEKYHYLQS | EISALFQKLE         | NINGISACYL | DSLNALRSL         | QAILQTDMDI  | RVFEIRLTEE | DTLSLDPDKV         |            |  |  |  |  |  |  |
| 801  | EAYRACLKMK  | KADLSMKKSL | LGTLEAELQK         | ALQVHSQSSQ | TYPHYELDLG        | KFADRVSQLT  | DRWQRLKQL  | DDRSWDLEKQ         |            |  |  |  |  |  |  |
| 881  | VKQLRIYRDL  | YQALNKWICD | ARRRQETIEA         | MKLGDVSTVM | RYLQEQKNLH        | SEVTSKRDRV  | EEVIKHAEC  | SLAIKDYELQ         |            |  |  |  |  |  |  |
| 961  | AAAYSSGLET  | LLNIPVKRSM | VQSPSGLILQ         | EAGEIQSRYI | ELLTRSGDYY        | KFLSEMLKSL  | EDIKMKSTRI | ELLEELRLA          |            |  |  |  |  |  |  |
| 1041 | KDANSDSNNK  | HKFLEQNLQK | YQVECSQLKA         | KFISLEEMKR | QVEMDSSTSK        | QNLDKCYAQI  | KDLNDRITRL | TYEIEDEKRR         |            |  |  |  |  |  |  |
| 1121 | RKLLLEDREYQ | QKADFDQLQK | TRQNEKETLG         | WQKIESEKII | KEKEYELERL        | RVLLQDEGTR  | KRECENELAK | VRNQFNEEMS         |            |  |  |  |  |  |  |
| 1201 | NIKNKYETEI  | NIKKTTHQI  | AAQKEDDAKN         | LRTQIDRLQR | ENRDLKDEIV        | RLNEAILDIT  | EQRRAEENI  | LQQKACGSEV         |            |  |  |  |  |  |  |
| 1281 | LQQKQQIELE  | LKQIIQLRND | DNTRYKQALE         | DATSTIHEKV | KEIERLKIQL        | KEEAKSRWEL  | ENELAKVRNS | YDEEIIISLKN        |            |  |  |  |  |  |  |
| 1361 | KYETEINIKT  | TTINQVTVKK | EEEASNYRAQ         | LDNAVRENRS | LCEELRRLKN        | TLSTQTTENLR | KVEESVHQKQ | SIGSEISQKK         |            |  |  |  |  |  |  |
| 1441 | QOLEKELKQT  | VQKFTEEIAH | YKQSLDEAGR         | TIKEKNKEIE | KNRKLLDAEI        | SQRKSMEEEN  | IHLQRIQYDL | EKANINAKET         |            |  |  |  |  |  |  |
| 1521 | ISRLKVQEQE  | LGRLKSEYER | LAQDKKGKDQ         | ESTRLQSTVK | ELQHQKHMLE        | EELNRQSRIV  | ADETSKRKNA | EEELEAMRRT         |            |  |  |  |  |  |  |
| 1601 | LRDQAVKITN  | LTQQIEEISI | VKKRSEDDL          | HQREVLDNHM | REKQRYMEEI        | RKYTSEVESL  | RRQMVQEEN  | LKQAHIRNEH         |            |  |  |  |  |  |  |
| 1681 | LQKAIEDKSK  | SLNECKIEIE | RLQCLTENLT         | KEHLMLEEL  | RNLRLLEYDDL       | RRGRSEVDEE  | KNAAILDLKN | QLQTSNKHAL         |            |  |  |  |  |  |  |
| 1761 | ELQGVINGLQ  | KERENLRQEI | EKFQKQALET         | SHRIQESKNQ | CNHVMQERET        | LLIKIKTLEQ  | DKARLLRLEE | DLNRTKGMLE         |            |  |  |  |  |  |  |
| 1841 | SESRLKVRLE  | NEKQQILNDL | NQWKSQYSRK         | EETIRKTESE | RDKSEREKSA        | LLIEIERLQA  | EIKRIEERYR | CRLEETSRSK         |            |  |  |  |  |  |  |
| 1921 | QAEMETERLR  | LQREIEKLKQ | RPKGAPRGTT         | TEEDLMIDPS | KLLFSGLRKK        | ITAVQLYECQ  | LIDKCTLDKL | LRGQKSVVEV         |            |  |  |  |  |  |  |
| 2001 | AAELEPYLRG  | AGAIAGASLN | TKVKFSLVEA         | KRKQLLTPEN | TVLLLEAQAA        | TGGVIDPHRN  | ELLSVDSAVA | RDLIDFDDRE         |            |  |  |  |  |  |  |
| 2081 | QIYMAEKAIT  | GFKDPFSGKM | MPVAEAMKKN         | LVDRETGLRL | LEAQLASGGI        | VDPINSIFLP  | KDIALSRGLI | DRDLRYALNN         |            |  |  |  |  |  |  |
| 2161 | PSKPLIDPLS  | KVAISYMKLR | EKCRVEQHTG         | LLLLPVQQRN | TSFQGIKQI         | SVSELVESGI  | IRESTANELE | TGAITVEEVT         |            |  |  |  |  |  |  |
| 2241 | DRIKDFLQGS  | SCIAGIYNEA | TGEKLGVIYA         | MKIGLVRPGT | ALELLEAQAA        | TGFIVDPVNN  | LRLPVEEAYK | RGLVGIEFKE         |            |  |  |  |  |  |  |
| 2321 | KLLSAERAVT  | GYKDPETGNI | ISLFQAMNKE         | LIEKGHGIRL | <b>LEAQIATGGI</b> | IDPKESHRLP  | VHTAYQRGYF | NEELNDILSD         |            |  |  |  |  |  |  |
| 2401 | PSDDTKGFFD  | PNTENLTYL  | QLKGRCKIDE         | STRCLLLPLR | EKKKVVQTSQ        | KNTLRKRRVV  | IVDPDTNKEM | SVQEAYNKGL         |            |  |  |  |  |  |  |
| 2481 | IDYSTYMELS  | DQCEWEIEIT | TTGSDGSTRV         | VLVDRKTGHQ | YDIEDALDKG        | LVDRKFFDQY  | RSGLSLTQF  | ADMIASRNGG         |            |  |  |  |  |  |  |
| 2561 | DEVFRQESII  | RSPTVSVSKS | SSILLKSSSG         | SFSDSPEETT | PIAAIFDTEN        | LEKISISEAV  | QRGIVDTITA | QRLLAEQTCT         |            |  |  |  |  |  |  |
| 2641 | GGILCPTTGG  | RLSLQDAVAQ | GIIDHEMATR         | LKPAQKAFGL | FEGIKGRKRM        | SAAEAVKEKW  | LPYEAGQRF  | EFQFITGGLI         |            |  |  |  |  |  |  |
| 2721 | DPEVHGRIST  | EEAIRKGLID | GRTSQRLQDI         | SNYAKILTCP | KTKLKISYRE        | AMNRSMVEDQ  | TGLKLEASS  | VSSKGISSPY         |            |  |  |  |  |  |  |
| 2801 | NVSSAPGSR   | GSRSRSGS   | RSRSRSGS           | AGTSSSYSYS | YTAVSSNSSL        | GR          |            |                    |            |  |  |  |  |  |  |

Supporting Peptides:

| Peptide             | Uniq | -10lgP | Mass      | Length | ppm  | m/z      | z | RT    | Fraction | Scan     | Source File               | Area F1 | Area F2  | Area F3 | Area I |
|---------------------|------|--------|-----------|--------|------|----------|---|-------|----------|----------|---------------------------|---------|----------|---------|--------|
| R.LLEAQIATGGIIDPK.E | Y    | 62.51  | 1537.8715 | 15     | 0.8  | 769.9436 | 2 | 51.54 | 6        | F6:15197 | 17112021_RID_2349_DP6.raw |         |          |         |        |
| R.QLQNIQATSR.E      | Y    | 51.48  | 1270.6993 | 11     | 0.2  | 636.3571 | 2 | 38.60 | 2        | F2:10594 | 12112021_RID_2349_DP2.raw |         | 1.0785E4 |         | 1.2228 |
| K.SNKPILR.A         | Y    | 44.33  | 939.5865  | 8      | -0.1 | 470.8005 | 2 | 24.97 | 6        | F6:6034  | 17112021_RID_2349_DP6.raw |         |          |         |        |
| R.AELIVQPELK.Y      | Y    | 42.71  | 1138.6597 | 10     | -0.2 | 570.3370 | 2 | 43.74 | 6        | F6:12471 | 17112021_RID_2349_DP6.raw |         |          |         |        |

total 4 peptides

XP\_034285002.1  
[back to list](#)

[Protein Coverage](#) | [Supporting Peptides](#) |

Protein Coverage:

|      |                   |                   |                     |            |                   |                   |             |                      |  |
|------|-------------------|-------------------|---------------------|------------|-------------------|-------------------|-------------|----------------------|--|
| 1    | MSINGSHPR         | NTLGRMVRSE        | SGPDMRYDMN          | SHMMMGGGGG | GGGGGSSSHA        | HKMYVQKCY         | VGDINSEGYT  | QNGTATVSRR           |  |
| 81   | QNTIQDLLQA        | CSDCLMR           | <b>AEL IVQPELKY</b> | GIQISRNREL | EDCFGQANEH        | MDILDGLIRE        | MRQMGQPCDL  | YQKRLLQLQE           |  |
| 161  | QMRALYKAIS        | VPRVRRASSK        | GGGYSSQSAS          | GWDEYTRRV  | SECLNWMRQQ        | KTEMELVKWG        | FDAAAIEQQI  | AEHRRFHNSI           |  |
| 241  | G DYRWHLDKV       | KTDLREKAAV        | HQLEEEYEYL          | LRFSFERMDQ | <b>LRQLQNIIQA</b> | <b>TSREIMWIND</b> | CEEEELLYDW  | SDRNTDIARK           |  |
| 321  | QEVFSKRMSQ        | LEVKEKELNK        | LKQECDQLVL          | SQHPASDKIE | AYMDTLQTQW        | SWILQITKCI        | DVHLKENAAY  | FQFFEEAHST           |  |
| 401  | ENYLKNLQDA        | IRKRFICDKN        | MSLQVLLEQI          | KELEAEREKI | LEYKRQVQNL        | VNKSCKIVQL        | KPRNPEYK    | <b>SN KPIILRALCD</b> |  |
| 481  | YKQDLKTMRK        | GDECILKDNS        | ERSKWHVTGP          | GGLDMLVPSV | SLIIPPNPL         | AVDLATKIEQ        | YYDAIMALWN  | QLYINMKSLV           |  |
| 561  | SWHYCMIDVE        | KIRAMTIAKL        | KTMRRREDYQR         | IIADLEIHYQ | EFIRNSQGSE        | MFGDDDKRNM        | QTQITDAQKH  | YQTLVMTLPR           |  |
| 641  | QTQTGPPIVT        | EVITIEKEKQ        | EAWLLMELQK          | LRRQIENCEF | RMVQRTPFQL        | DQGASHNLSV        | RISELESIQI  | ESQSMAEALN           |  |
| 721  | RQKDYLPNFR        | GSEKYHYLQS        | EISALFQKLE          | NINGVSACYL | DSLNALRSL         | QAILQTDDVI        | RVFEIRLTEE  | DTLSLDPDKV           |  |
| 801  | EGYRVCLKMK        | KADLTMMKSL        | LGTLEAELQK          | ALQVHSQSSQ | TYPHYDLDLG        | KFADRVSQLR        | DRWQRLEKQL  | DDRSWDLEKQ           |  |
| 881  | VKQLRIYREL        | YQALNKWICD        | ARRRQDTIEA          | MKLGDVSTVM | RYLQEQKNLH        | SEITSKRDRV        | EDVVKNAEVC  | SLAIKDYELQ           |  |
| 961  | AAAYSSGLET        | LLNIPVKRSM        | VQSPSGLILQ          | EAGEIQSRYI | ELLTRSGDYY        | KFLSEMLKSL        | EDIKMKSTRI  | ELLEEEELRLA          |  |
| 1041 | KDANSDSNNK        | HKFLEQNLOK        | YQVECSQLKA          | KFISLEEMKR | QVEMDGSTAK        | QNLDKCYAQI        | KDLNERITRL  | TYEIEDEKRR           |  |
| 1121 | RKLLLEDYDQ        | QKSDFDQLQK        | TRHNEKETLG          | WQKIESEKII | KEKEYEIERL        | RVLLQDEGTR        | KRECENELAK  | TSHRIQESKS           |  |
| 1201 | QCNHIMQERE        | TLLVKIKTLE        | QDKARLLRLE          | EDLNRTKGML | ESESRLKARL        | ENEKQQILND        | LNQWKSQYSR  | KEETIRKTEC           |  |
| 1281 | ERDKSEREKS        | SLIEIERLQ         | AEIKRIEERY          | RCRLEETSRL | SQAEMETERS        | RWQKEIDKLK        | KRPYGAHRST  | QTEEDLMIDP           |  |
| 1361 | SKLLFNGLRK        | KITAVQLYEC        | QLIDKCTLDK          | LLRGQKSVEE | VAAELEPYLK        | GAGAIAGASL        | NTKEKYSLVE  | AKRKQLLTPE           |  |
| 1441 | NTILLLEAQA        | ATGGVIDPHR        | NELLSVDSAV          | ARDLVDFDDR | EQIYMAEKAI        | TGFKDPFSGK        | TMSVAEAIKK  | NLVDRETGMR           |  |
| 1521 | LLEAQLASGG        | IVDPINSIFL        | PKDIALSRGL          | IDRDLYRALN | NPSKPLIDPL        | SKNAISYMKL        | RERCRIEPT   | GLLLLVPVQKR          |  |
| 1601 | SMSFQGIRKL        | ITVSELVDVG        | IIRESTANEL          | ETGAITVEEV | TDRIKDFLQG        | SSCIAGIYNE        | ATGEKLGVIYQ | AMKIGLVRPG           |  |
| 1681 | TALELLEAQA        | ATGFIVDPVN        | NLRLPVEEGY          | KRGLVGIEFK | EKLLSAERAV        | TGYRDPETGN        | IISLFQAMNK  | ELIEKGHGV            |  |
| 1761 | <b>LLEAQIATGG</b> | <b>IIDPKESHRL</b> | PVHTAYQRGY          | FNEELNDILS | DPSDDTKGFF        | DPNTEENLTY        | LQLKGRCKID  | ELTGLCLLPL           |  |
| 1841 | REKKKVQTS         | QKNTLRKRRV        | VIVDPDTSKE          | MSVQEAYNKG | LIDYSTYMEL        | SDQCEWEEI         | TTTGS DGSTR | VVLVDRKTGH           |  |
| 1921 | QYDIEDAIEK        | GLVDRKFFEQ        | YRSGSLSLTQ          | FADMIASRNG | GDEVFKHESI        | IRSPTVLSVK        | SSSILLKSSS  | GSFSDSPEEA           |  |
| 2001 | TPIAAIFDTE        | NLEKISIPEA        | VQRGIVDTIT          | AQRLLEAQSC | TGGIICPTTG        | QRLSLQDAVA        | QGIIDHEMAT  | RLKPAQKAFL           |  |
| 2081 | GFEGIKGRKR        | MSAAEAVKEK        | WLPYEAGQRF          | LEFQFITGGL | VDPEVHGRIS        | TEEAIRKGLI        | DGRTSQRLQD  | IGNYAKILTC           |  |
| 2161 | PKTKLKISYR        | EAMNRS MVED       | QTGLRLLEAS          | SVSSKGISSP | YNVSSAPGSR        | SGSRSGSRSG        | SRSGSRSGSF  | DAGTSSSYSY           |  |
| 2241 | SYTTVSSGSL        | GR                |                     |            |                   |                   |             |                      |  |

Supporting Peptides:

| Peptide             | Uniq | -10lgP | Mass      | Length | ppm  | m/z      | z | RT    | Fraction | Scan     | Source File               | Area F1  | Area F2 | Area F3 | Area F4 |
|---------------------|------|--------|-----------|--------|------|----------|---|-------|----------|----------|---------------------------|----------|---------|---------|---------|
| R.LLEAQIATGGIIDPK.E | Y    | 62.51  | 1537.8715 | 15     | 0.8  | 769.9436 | 2 | 51.54 | 6        | F6:15197 | 17112021_RID_2349_DP6.raw |          |         |         |         |
| R.QLQNIIQATSR.E     | Y    | 51.48  | 1270.6993 | 11     | 0.2  | 636.3571 | 2 | 38.60 | 2        | F2:10594 | 12112021_RID_2349_DP2.raw | 1.0785E4 |         |         | 1.2228  |
| K.SNKPIILR.A        | Y    | 44.33  | 939.5865  | 8      | -0.1 | 470.8005 | 2 | 24.97 | 6        | F6:6034  | 17112021_RID_2349_DP6.raw |          |         |         |         |
| R.AELIVQPELK.Y      | Y    | 42.71  | 1138.6597 | 10     | -0.2 | 570.3370 | 2 | 43.74 | 6        | F6:12471 | 17112021_RID_2349_DP6.raw |          |         |         |         |

total 4 peptides

XP\_034285001.1

[back to list](#)

[Protein Coverage](#) | [Supporting Peptides](#) |

Protein Coverage:

1 MSINGSHPRLL NTLGRMVRSE SGPDMRYDMN SHMMMGGGGG GGGGGGSSHA HKMYVQKCY VGDINSEGYT QNGTATVSRR  
81 QNTIQDLLQA CSDCLMR**AEL IVQPELK**YGD GIQISRNREL EDCFGQANEH MDILDGLIRE MRQMGQPCDL YQKRLLQLQE  
161 QMRALYKAIS VPRVRASSK GGGYSSQSAS GWDEYTRRVT SECLNWMRQQ KTEMELVKWG FDAAAIEQQI AEHRRFHNSI  
241 GDYRWHLDKV KTDLREKAAV HQLEEEYEYL LRFSEFERMDQ LR**QLQNIIQA TS**REIMWIND CEEELLYDW SDRNTDIARK  
321 QEVFSKRMSQ LEVKEKELNK LKQECDQLVL SQHPASDKIE AYMDTLQTQW SWILQITKCI DVHLKENAAY FQFFEEAHST  
401 ENYLKNLQDA IRKRFICDKN MSLQVLLEQI KELEAEREKI LEYKRQVQNL VNKSKKIVQL KPRNPEYK**SN KPIIL**RALCD  
481 YKQDLKTMRK GDECILKDNS ERSKWHVTGP GGLDMLVPSV SLIIPPPNPL AVDLATKIEQ YYDAIMALWN QLYINMKSLV  
561 SWHYCMIDVE KIRAMTIAKL KTMRRREDYQR IIADLEIHQY EFIRNSQGSE MFGDDDKRNM QTQITDAQKH YQTLVMTLPR  
641 QTQTGPPIVT EVITIEKEKQ EAWLLMELQK LRRQIENCF RMVQRTPFQL DQGASHNLSV RISELESIQI ESQSMAEALN  
721 RQKDYLPNFR GSEKYHYLQS EISALFQKLE NINGVSACYL DSLNALRSL QAILQTDDVI RVFEIRLTEE DTLSLDPDKV  
801 EGYRVCLKKM KADLTMKKSL LGTLEAELQK ALQVHSQSSQ TYPHYDLDLG KFADRVSQLR DRWQRLEKQL DDRSWDLEKQ  
881 VKQLRIYREL YQALNKWICD ARRRQDTIEA MKLGDVSTVM RYLQEQKNLH SEITSKRDRV EDVVKNAEVC SLAIKDYELQ  
961 AAAYSSGLET LLNIPVKRSM VQSPSGLILQ EAGEIQSRYI ELLTRSGDYY KFLSEMLKSL EDIKMKSTRI ELLEELRLA  
1041 KDANSDSNK HKFLEQNLOK YQVECSQLKA KFISLEEMKR QVEMDGSTAK QNLDKCYAQI KDLNERITRL TYEIEDEKRR  
1121 RKLLLEDYDQ QKSDFDQLQK TRHNEKETLG WQKIESEKII KEKEYEIERL RVLLQDEGTR KRECENELAK VRNQFNEEMS  
1201 NIKNKYETEI NIKKTTIHQI AAQKEDDAKN LRTQIERLQR ENRDLKDEIV RLNEAILDTT EQRRRAEENV LQQKACGSEV  
1281 IQQKQQIELE LKQIIQLRND DNTRYKQALE DATSTIHEKV KELERLKIQL QEEAKSRWEL ENELAKTSHR IQESKSQCNH  
1361 IMQERETLLV KIKTLEQDKA RLLRLEEDLN RTKGMLESES RLKARLENEK QQILNDLNQW KSQYSRKEET IRKTECERDK  
1441 SEREKSSLLI EIERLQAEIK RIEERYRCRL EETSRKSQAE METERSRWQK EIDKLKKRPY GAHRSTQTEE DLMIDPSKLL  
1521 FNGLRKKITA VQLYECQLID KCTLDKLLRG QKSVEEVAEE LEPYLKGAGA IAGASLNTKE KYSLVEAKRK QLLTPENTIL  
1601 LLEAQAAATGG VIDPHRNELL SVDSAVARDL VDFDDREQIY MAEKAITGFK DPFSGKTMSV AEAIKKNLVD RETGMRLLEA  
1681 QLASGGIVDP INSIFLPKDI ALSRGLIDRD LYRALNNPSK FLIDPLSKNA ISYMKLRERC RIEPHTGLLL LPVQKRSMFS  
1761 QGIRKLITVS ELVDSGIIRE STANELETGA ITVEEVTDRI KDFLQGSSCI AGIYNEATGE KLGVIYQAMKI GLVRPGTALE  
1841 LLEAQAAATGF IVDPVNNLRL PVEEGYKRGL VGIEFKEKLL SAERAVTGYR DPETGNIISL FQAMNKELIE KGHGVR**LLEA**  
1921 **QIATGGIIDP K**ESHRLPVHT AYQRGYFNEE LNDILSDPSD DTKGFFDPNT EENLTYLQLK GRCKIDELTG LCLLPLREKK  
2001 KVVQTSQKNT LRKRRVVIVD PDTSKEMSVQ EAYNKGLIDY STYMELSDQE CEWEEITTTG SDGSTRVVLV DRKTGHQYDI  
2081 EDAIEKGLVD RKFFEQYRSG SLSLTQFADM IASRNGGDEV FKHESIIRSP TVLSVKSSSI LLKSSSGSFS DSPEEATPIA  
2161 AIFDTENLEK ISIPEAVQRG IVDTITAQRL LEAQSCGTGGI ICPTTGQRLS LQDAVAQGII DHEMATRLKP AQKAFLGFEG  
2241 IKGRKRMSAA EAVKEKWLPY EAGQRFLEFQ FITGGLVDPE VHGRISTEEA IRKGLIDGRT SQRLQDIGNY AKILTCPKTK  
2321 LKISYREAMN RSMVEDQTGL RLEASSVSS KGISSPYNVS SAPGSRSGSR SGRSGSRSG SRRGSFDAGT SSSYSYSYTT  
2401 VSSGSLGR

Supporting Peptides:

| Peptide             | Uniq | -10lgP | Mass      | Length | ppm  | m/z      | z | RT    | Fraction | Scan     | Source File               | Area F1  | Area F2 | Area F3 | Area I |
|---------------------|------|--------|-----------|--------|------|----------|---|-------|----------|----------|---------------------------|----------|---------|---------|--------|
| R.LLEAQIATGGIIDPK.E | Y    | 62.51  | 1537.8715 | 15     | 0.8  | 769.9436 | 2 | 51.54 | 6        | F6:15197 | 17112021_RID_2349_DP6.raw |          |         |         |        |
| R.QLQNIIQATSR.E     | Y    | 51.48  | 1270.6993 | 11     | 0.2  | 636.3571 | 2 | 38.60 | 2        | F2:10594 | 12112021_RID_2349_DP2.raw | 1.0785E4 |         |         | 1.2228 |
| K.SNKPIILR.A        | Y    | 44.33  | 939.5865  | 8      | -0.1 | 470.8005 | 2 | 24.97 | 6        | F6:6034  | 17112021_RID_2349_DP6.raw |          |         |         |        |
| R.AELIVQPELK.Y      | Y    | 42.71  | 1138.6597 | 10     | -0.2 | 570.3370 | 2 | 43.74 | 6        | F6:12471 | 17112021_RID_2349_DP6.raw |          |         |         |        |

total 4 peptides

XP\_034285000.1  
[back to list](#)

[Protein Coverage](#) | [Supporting Peptides](#) |  
Protein Coverage:

1 MSINGSHPRLL NTLGRMVRSE SGPDMRYDMN SHMMMGGGGG GGGGGGSSHA HKMYVQKCY VGDINSEGYT QNGTATVSRR  
81 QNTIQDLLQA CSDCLMR**AEL IVQPELKY**GD GIQISRNREL EDCFGQANEH MDILDGLIRE MRQMGQPCDL YQKRLLQLQE  
161 QMRALYKAIS VPRVRRASSK GGGYSSQSAS GWDEYTRRV T SECLNWMRQQ KTEMELVKWG FDDAAIEQQI AEHRRFHNSI  
241 GDYRWHLDKV KTDLREKAAV HQLEEEYEYL LRFSSFERMDQ LR**QLQNIQA TSREIM**WIND CEEELLYDW SDRNTDIARK  
321 QEVFSKRMSQ LEVKEKELNK LKQECDQLVL SQHPASDKIE AYMDTLQTQW SWILQITKCI DVHLKENAAY FQFFEEAHST  
401 ENYLKNLQDA IRKRFICDKN MSLQVLLEQI KELEAEREKI LEYKRQVQNL VNKSKKIVQL KPRNPEYK**SN KPIILR**ALCD  
481 YKQDLKTMRK GDECILKDNS ERSKWHVTGP GGLDMLVPSV SLIIPPPNPL AVDLATKIEQ YYDAIMALWN QLYINMKSLV  
561 SWHYCMIDVE KIRAMTIAKL KTMRRREDYQR IIADLEIHQY EFIRNSQGSE MFGDDDKRNM QTQITDAQKH YQTLVMTLPR  
641 QTQTGPPIVT EVITIEKEKQ EAWLLMELQK LRRQIENCF RMVQRTPFQL DQGASHNLSV RISELESIQI ESQSMAEALN  
721 RQKDYLPNFR GSEKYHYLQS EISALFQKLE NINGVSACYL DSLNALRSL QAILQTDDVI RVFEIRLTEE DTLSLDPDKV  
801 EGYRVCLKKM KADLTMKKSL LGTLEAELQK ALQVHSQSSQ TYPHYDLDLG KFADRVSQLR DRWQRLEKQL DDRSWDLEKQ  
881 VKQLRIYREL YQALNKWICD ARRRQDTIEA MKLGDVSTVM RYLQEQKNLH SEITSKRDRV EDVVKNAEVC SLAIKDYELQ  
961 AAAYSSGLET LLNIPVKRSM VQSPSGLILQ EAGEIQSRYI ELLTRSGDY KFLSEMLKSL EDIKMKSTRI ELLEELRLA  
1041 KDANSDSNK HKFLEQNLOK YQVECSQLKA KFISLEEMKR QVEMDGSTAK QNLDKCYAQI KDLNERITRL TYEIEDEKRR  
1121 RKLLLEDYDQ QKSDFDQLQK TRHNEKETLG WQKIESEKII KEKEYEIERL RVLLQDEGTR KRECENELAK VRNQFNEEMS  
1201 NIKNKYETEI NIKKTTIHQI AAQKEDDAKN LRTQIERLQR ENRDLKDEIV RLNEAILDTT EQRRRAEENV LQQKACGSEV  
1281 IQQKQQIELE LKQIIQLRND DNTRYKQALE DATSTIHEKV KELERLKIQL QEEAKSRWEL ENELAKVRNS YDEEIIISLKN  
1361 KYETEINITK TTINQVTVKK EEEASNYRAQ LDNAVRENRS LCEEIRRLKN TLSQTENLR KVEENAHQQK AIGSEISQKK  
1441 QHLEKELKQT VQKFTEEIAH YKQSLDEAGR TLKEKNKEIE KNRKLLDAEI CQRKSLEEN IRLQRIQYDL EKANINATET  
1521 ISRLKVQEQD LGRLKSEYER LAQDKKQKQD ESTRLQSTIK EMQHQKHMLE EELNRQSRIA ADETSKRKNA EEELEAMRRT  
1601 LREQAVKITN LTQQIEEISI VKKRSEDDL RQREVLDSDM RDKQRYMEEI RKYTSEVEAL RRQMVQEQEN LKQAHIRNEH  
1681 LQKAIEDKSK SLNECKIEIE RLQCLTENLT KEHLMLEEL RNLRLYDDL RRGSEVDEE KNATILDKN QLQTSNKHAI  
1761 ELQGVINGLQ KERENLRQEI EKQKQKQALE SHRIQESKSQ CNHIMQERET LLVKIKTLEQ DKARLLRLEE DLNRTKGMLE  
1841 SESRLKARLE NEKQQILNDL NQWKSQYSRK EETIRKTECE RDKSEREKSS LLIEIERLQA EIKRIEERYR CRLEETSRSK  
1921 QAEMETERSR WQKEIDKLK RPYGAHRSTQ TEEDLMIDPS KLLFNGLRKK ITAVQLYECQ LIDKCTLDKL LRGQKSVVEV  
2001 AAELEPYLKG AGAIAGASLN TKEKYSLVEA KRKQLLPEN TILLLEAQAA TGGVIDPHRN ELLSVDSAVA RDLVDFDDRE  
2081 QIYMAEKAIT GFKDPFSGKT MSVAEAIKK LVDRETGMRL LEAQLASGGI VDPINSIFLP KDIALSRGLI DRDLRYALNN  
2161 PSKPLIDPLS KNAISYMKLR ERCRIEPTG LLLLFPVQKRS MSFQGIKRLI TVSELVDSGI IRESTANELE TGAITVEEVT  
2241 DRIKDFLQGS SCIAGIYNEA TGEKLGVIYA MKIGLVRPGT ALELLEAQAA TGFIVDPVNN LRLPVEEGYK RGLVGIEFKE  
2321 KLSAERAVT GYRDPETGNI ISLFQAMNKE LIEKGHGVR**L LEAQIATGGI IDPK**ESHRLP VHTAYQRGYF NEELNDILSD  
2401 PSDDTKGFFD PNTEENLTYL QLKGRCKIDE LTGLCLLPLR EKKKVVTSTQ KNTLRKRRV IVDPDTSKEM SVQEAYNKG  
2481 IDYSTYMELS DQCEWEEIT TTGSDGSTV VLVDKRTGHQ YDIEDAIEKG LVDRKFFEYQ RSGSLSLTQF ADMIASRNGG  
2561 DEVFKHESII RSPTVLSVKS SSILLKSSSG SFSDSPEEAT PIAAIFDTEN LEKISIPEAV QRGIVDTITA QRLLEAQSCT  
2641 GGIICPTTGQ RLSLQDAVAQ GIIDHEMATR LKPAQKAFGL FEGIKGRKRM SAAEAVKEKW LPYEAGQRFL EFQFITGGLV  
2721 DPEVHGRIST EBAIRKGLID GRTSQRLQDI GNYAKILTCP KTKLKISYRE AMNRSMVEDQ TGLRLLEASS VSSKGISSPY  
2801 NVSSAPGSRG GSRSGSRSGS RSGSRRGSFD AGTSSSYSYS YTTVSSGSLG R

Supporting Peptides:

| Peptide             | Uniq | -10lgP | Mass      | Length | ppm  | m/z      | z | RT    | Fraction | Scan     | Source File               | Area F1  | Area F2 | Area F3 | Area F4  |
|---------------------|------|--------|-----------|--------|------|----------|---|-------|----------|----------|---------------------------|----------|---------|---------|----------|
| R.LLEAQIATGGIIDPK.E | Y    | 62.51  | 1537.8715 | 15     | 0.8  | 769.9436 | 2 | 51.54 | 6        | F6:15197 | 17112021_RID_2349_DP6.raw |          |         |         |          |
| R.QLQNIQATSR.E      | Y    | 51.48  | 1270.6993 | 11     | 0.2  | 636.3571 | 2 | 38.60 | 2        | F2:10594 | 12112021_RID_2349_DP2.raw | 1.0785E4 |         |         | 1.2228E4 |
| K.SNKPIILR.A        | Y    | 44.33  | 939.5865  | 8      | -0.1 | 470.8005 | 2 | 24.97 | 6        | F6:6034  | 17112021_RID_2349_DP6.raw |          |         |         |          |
| R.AELIVQPELK.Y      | Y    | 42.71  | 1138.6597 | 10     | -0.2 | 570.3370 | 2 | 43.74 | 6        | F6:12471 | 17112021_RID_2349_DP6.raw |          |         |         |          |

total 4 peptides

JAG67762.1  
[back to list](#)

| [Protein Coverage](#) | [Supporting Peptides](#) |

Protein Coverage:

1 **MVHWSAEK**H MITSLWSKVD VAEVGGATLG **KLMVVYPWTQ**R RFFAHFGNLS GPSAICGNPQ VKAHGK**KVLT SFGEA**IKHLD  
81 NVKETFAKLS ELHCDKLHVD PENFKLLGNI LIIVLAGHHG KEFTPCVHAT FQKLTNVVAH SLARRYH

Supporting Peptides:

| Peptide        | Uniq | -10lgP | Mass      | Length | ppm  | m/z      | z | RT    | Fraction | Scan     | Source File               | Area F1 | Area F2 | Area F3 | Area F4 |
|----------------|------|--------|-----------|--------|------|----------|---|-------|----------|----------|---------------------------|---------|---------|---------|---------|
| K.VLTSFGEAIK.H | N    | 61.56  | 1063.5913 | 10     | -0.1 | 532.8029 | 2 | 41.86 | 7        | F7:11920 | 17112021_RID_2349_DP7.raw |         |         |         |         |

total 5 peptides

| Peptide                | Uniq | -10lgP | Mass      | Length | ppm | m/z      | z | RT    | Fraction | Scan     | Source File               | Area F1 | Area F2 | Area F3 | Area F4 |
|------------------------|------|--------|-----------|--------|-----|----------|---|-------|----------|----------|---------------------------|---------|---------|---------|---------|
| K.LMVVYPWTQR.F         | Y    | 58.78  | 1291.6747 | 10     | 0.4 | 646.8448 | 2 | 54.62 | 7        | F7:16340 | 17112021_RID_2349_DP7.raw |         |         |         |         |
| M.VHWSAEK.H            | N    | 52.31  | 984.4665  | 8      | 0.7 | 493.2408 | 2 | 21.02 | 7        | F7:4832  | 17112021_RID_2349_DP7.raw |         |         |         |         |
| K.LM(+15.99)VVYPWTQR.F | Y    | 50.62  | 1307.6697 | 10     | 0.1 | 654.8422 | 2 | 51.02 | 7        | F7:15084 | 17112021_RID_2349_DP7.raw |         |         |         |         |
| K.KVLTSFGGEAIK.H       | N    | 48.51  | 1191.6863 | 11     | 1.5 | 596.8513 | 2 | 36.27 | 7        | F7:10106 | 17112021_RID_2349_DP7.raw |         |         |         |         |

total 5 peptides

JAG67761.1  
[back to list](#)

| [Protein Coverage](#) | [Supporting Peptides](#) |  
Protein Coverage:

|    |            |            |            |            |            |            |            |        |      |            |  |
|----|------------|------------|------------|------------|------------|------------|------------|--------|------|------------|--|
| 1  | MVHWSAEKH  | MITSLWSKVD | VAEVGGATLG | KLMVVYPWTQ | R          | RFFAHFGNLS | GPSAICGNPQ | VKAHGK | KVLT | SFGEAIKHLD |  |
| 81 | NVKETFAKLS | ELHCDKLHVD | PENFKLLGNI | LIIVLAGHHG | KEFTPCVHAT | FQKLNTVVAH | SLARRYH    |        |      |            |  |

Supporting Peptides:

| Peptide                | Uniq | -10lgP | Mass      | Length | ppm  | m/z      | z | RT    | Fraction | Scan     | Source File               | Area F1 | Area F2 | Area F3 | Area F4 |
|------------------------|------|--------|-----------|--------|------|----------|---|-------|----------|----------|---------------------------|---------|---------|---------|---------|
| K.VLTSFGGEAIK.H        | N    | 61.56  | 1063.5913 | 10     | -0.1 | 532.8029 | 2 | 41.86 | 7        | F7:11920 | 17112021_RID_2349_DP7.raw |         |         |         |         |
| K.LMVVYPWTQR.F         | Y    | 58.78  | 1291.6747 | 10     | 0.4  | 646.8448 | 2 | 54.62 | 7        | F7:16340 | 17112021_RID_2349_DP7.raw |         |         |         |         |
| M.VHWSAEK.H            | N    | 52.31  | 984.4665  | 8      | 0.7  | 493.2408 | 2 | 21.02 | 7        | F7:4832  | 17112021_RID_2349_DP7.raw |         |         |         |         |
| K.LM(+15.99)VVYPWTQR.F | Y    | 50.62  | 1307.6697 | 10     | 0.1  | 654.8422 | 2 | 51.02 | 7        | F7:15084 | 17112021_RID_2349_DP7.raw |         |         |         |         |
| K.KVLTSFGGEAIK.H       | N    | 48.51  | 1191.6863 | 11     | 1.5  | 596.8513 | 2 | 36.27 | 7        | F7:10106 | 17112021_RID_2349_DP7.raw |         |         |         |         |

total 5 peptides

XP\_015679695.1  
[back to list](#)

| [Protein Coverage](#) | [Supporting Peptides](#) |  
Protein Coverage:

|     |            |            |            |            |            |             |            |            |            |  |  |
|-----|------------|------------|------------|------------|------------|-------------|------------|------------|------------|--|--|
| 1   | MKGRLKGAWI | LSLLLAGLFQ | PNLGQEQQEI | LTGLQLSHQH | DEARSCLHAQ | PIPDRAKVDC  | YDSVQGSAMD | YGALSLSGEY |            |  |  |
| 81  | IPFRNYAGKY | ILFVNVAITY | GLTGQYLELN | ALQTSLGIDR | LVILGFPCNQ | FGKQEPGQNS  | EILQGIKHVR | PGGGFVPNFG |            |  |  |
| 161 | LFQKGDVNGE | NEQRIYTFLK | NSCPPVVENF | GDPAKLFWSP | LKTHDIKWNF | EKFLVNPQ GK | PVMRWFQ    | TN         | VSSVKNDIIR |  |  |
| 241 | YMRKNG     |            |            |            |            |             |            |            |            |  |  |

Supporting Peptides:

| Peptide            | Uniq | -10lgP | Mass      | Length | ppm | m/z      | z | RT    | Fraction | Scan     | Source File               | Area F1  | Area F2 | Area F3 | Area F4 |
|--------------------|------|--------|-----------|--------|-----|----------|---|-------|----------|----------|---------------------------|----------|---------|---------|---------|
| K.QEPGQNSEILQGIK.H | Y    | 85.68  | 1539.7893 | 14     | 0.2 | 770.9021 | 2 | 41.31 | 5        | F5:11775 | 17112021_RID_2349_DP5.raw |          |         |         | 1.0455E |
| R.TNVSSVKNDIIR.Y   | Y    | 68.80  | 1344.7361 | 12     | 0.4 | 673.3756 | 2 | 32.75 | 1        | F1:9508  | 12112021_RID_2349_DP1.raw | 2.0856E5 |         |         |         |

total 2 peptides

ADP88559.1  
[back to list](#)

| [Protein Coverage](#) | [Supporting Peptides](#) |  
Protein Coverage:

|     |            |            |             |             |            |             |            |             |     |         |      |        |  |  |  |
|-----|------------|------------|-------------|-------------|------------|-------------|------------|-------------|-----|---------|------|--------|--|--|--|
| 1   | MVLIRVLANL | LVLQLSYAQK | SSELVVG GHP | CNIYEH HFLA | FMYNSSGFMC | SGTLINQQWV  | LSAAHCDMEN | MHIYLG LHSF |     |         |      |        |  |  |  |
| 81  | KLPNKDQKKR | VAKEKFFCLS | SKSYTK      | WDKD        | IMLIKLNKPV | TYSTHIAS    | LS         | LPSNPPRVGS  | VCR | IMGWGSI | TSPK | KILPFV |  |  |  |
| 161 | PHCANINIVP | YTVCRVIYRP | LPEQSRTLCA  | GVSGRRIGSC  | LGDSGGPLIC | NGQIQGI VSW | GSDPCVNRGA | PSIYTKVFDY  |     |         |      |        |  |  |  |
| 241 | TDWIHSIIAG | NTAATCPS   |             |             |            |             |            |             |     |         |      |        |  |  |  |

Supporting Peptides:

| Peptide                 | Uniq | -10lgP | Mass      | Length | ppm  | m/z      | z | RT    | Fraction | Scan     | Source File               | Area F1  | Area F2  | Area F3 | Area F4 |
|-------------------------|------|--------|-----------|--------|------|----------|---|-------|----------|----------|---------------------------|----------|----------|---------|---------|
| K.WDKDIMLIK.L           | N    | 57.12  | 1160.6263 | 9      | -0.1 | 581.3204 | 2 | 46.64 | 2        | F2:13338 | 12112021_RID_2349_DP2.raw | 2.1169E5 | 9.915E6  |         | 1.510E  |
| K.WDKDIM(+15.99)LIK.L   | N    | 52.20  | 1176.6212 | 9      | -0.2 | 589.3177 | 2 | 41.27 | 2        | F2:11445 | 12112021_RID_2349_DP2.raw |          | 6.6323E6 | 2.116E  |         |
| R.IM(+15.99)GWGSITSPK.K | Y    | 51.75  | 1191.5958 | 11     | 1.1  | 596.8058 | 2 | 41.44 | 7        | F7:11830 | 17112021_RID_2349_DP7.raw |          |          |         |         |
| S.LSLPSNPPR.V           | N    | 41.33  | 979.5450  | 9      | -0.2 | 490.7797 | 2 | 34.94 | 7        | F7:9564  | 17112021_RID_2349_DP7.raw |          |          |         |         |

total 5

| Peptide         | Uniq -10lgP | Mass  | Length    | ppm | m/z  | z        | RT      | Fraction | Scan     | Source File               | Area F1 | Area F2 | Area F3 | Area F4 |
|-----------------|-------------|-------|-----------|-----|------|----------|---------|----------|----------|---------------------------|---------|---------|---------|---------|
| R.IMGWGSITSPK.K | Y           | 40.20 | 1175.6008 | 11  | -0.1 | 588.8076 | 2 47.84 | 4        | F4:13831 | 17112021_RID_2349_DP4.raw |         |         |         |         |

total 5

E5L0E3.1  
[back to list](#)

| [Protein Coverage](#) | [Supporting Peptides](#) |  
Protein Coverage:

|     |            |            |            |            |            |            |            |            |     |         |      |        |  |  |
|-----|------------|------------|------------|------------|------------|------------|------------|------------|-----|---------|------|--------|--|--|
| 1   | MVLIRVLANL | LVLQLSYAQK | SSELVVGGHP | CNIYEHFLA  | FMYNSSGFMC | SGTLINQQWV | LAAHCDMEN  | MHIYGLHSE  |     |         |      |        |  |  |
| 81  | KLPNKDQKKR | VAKEKFFCLS | SKSYTK     | WDKD       | IMLIKLNKPV | TYSTHIAS   | LS         | LPSNPPRVGS | VCR | IMGWGSI | TSPK | KILPFV |  |  |
| 161 | PHCANINIVP | YTVCRVIYRP | LPEQSRTLCA | GVSGRRIGSC | LGDSGGPLIC | NGQIQGIVSW | GSDPCVNRGA | PSIYTKVFDY |     |         |      |        |  |  |
| 241 | TDWIHSIIAG | NTAATCPS   |            |            |            |            |            |            |     |         |      |        |  |  |

Supporting Peptides:

| Peptide                 | Uniq -10lgP | Mass  | Length    | ppm | m/z  | z        | RT      | Fraction | Scan     | Source File               | Area F1  | Area F2  | Area F3 | Area F4 |
|-------------------------|-------------|-------|-----------|-----|------|----------|---------|----------|----------|---------------------------|----------|----------|---------|---------|
| K.WDKDIMLIK.L           | N           | 57.12 | 1160.6263 | 9   | -0.1 | 581.3204 | 2 46.64 | 2        | F2:13338 | 12112021_RID_2349_DP2.raw | 2.1169E5 | 9.915E6  | 1.510E5 |         |
| K.WDKDIM(+15.99)LIK.L   | N           | 52.20 | 1176.6212 | 9   | -0.2 | 589.3177 | 2 41.27 | 2        | F2:11445 | 12112021_RID_2349_DP2.raw |          | 6.6323E6 | 2.110E5 |         |
| R.IM(+15.99)GWGSITSPK.K | Y           | 51.75 | 1191.5958 | 11  | 1.1  | 596.8058 | 2 41.44 | 7        | F7:11830 | 17112021_RID_2349_DP7.raw |          |          |         |         |
| S.LSLPSNPPR.V           | N           | 41.33 | 979.5450  | 9   | -0.2 | 490.7797 | 2 34.94 | 7        | F7:9564  | 17112021_RID_2349_DP7.raw |          |          |         |         |
| R.IMGWGSITSPK.K         | Y           | 40.20 | 1175.6008 | 11  | -0.1 | 588.8076 | 2 47.84 | 4        | F4:13831 | 17112021_RID_2349_DP4.raw |          |          |         |         |

total 5

P0DJL5.1  
[back to list](#)

| [Protein Coverage](#) | [Supporting Peptides](#) |  
Protein Coverage:

|    |            |            |          |           |            |            |            |    |          |            |  |  |  |  |
|----|------------|------------|----------|-----------|------------|------------|------------|----|----------|------------|--|--|--|--|
| 1  | DQDCLPGWSY | FEKYCYKVFQ | VKKNWEDA | EK        | FCTEEVDGH  | LISLHSNEEV | EFMTSLAFPI | LK | YDIVWMGL | RNFWRDCPWK |  |  |  |  |
| 81 | WSDDAKLDYK | AWSDEPN    | CYGA     | MTTDYQWLR | WNCNDPRYFV | CKSPA      |            |    |          |            |  |  |  |  |

Supporting Peptides:

| Peptide               | Uniq -10lgP | Mass  | Length    | ppm | m/z | z        | RT      | Fraction | Scan     | Source File               | Area F1 | Area F2 | Area F3  | Area F4 |
|-----------------------|-------------|-------|-----------|-----|-----|----------|---------|----------|----------|---------------------------|---------|---------|----------|---------|
| K.YDIVWMGLR.N         | Y           | 67.55 | 1151.5797 | 9   | 0.6 | 576.7975 | 2 60.05 | 7        | F7:18181 | 17112021_RID_2349_DP7.raw |         |         | 1.1179E5 |         |
| K.YDIVWM(+15.99)GLR.N | Y           | 64.95 | 1167.5747 | 9   | 0.9 | 584.7952 | 2 53.11 | 7        | F7:15854 | 17112021_RID_2349_DP7.raw |         |         |          |         |
| K.WSDDAKLDYK.A        | Y           | 58.85 | 1239.5771 | 10  | 0.7 | 620.7963 | 2 32.61 | 7        | F7:8789  | 17112021_RID_2349_DP7.raw |         |         |          |         |
| M.TTDYQWLR.W          | Y           | 57.81 | 1081.5193 | 8   | 0.1 | 541.7670 | 2 42.38 | 7        | F7:12141 | 17112021_RID_2349_DP7.raw |         |         |          |         |

total 4 pep

AMB36341.1  
[back to list](#)

| [Protein Coverage](#) | [Supporting Peptides](#) |  
Protein Coverage:

|    |             |            |            |            |            |            |            |            |      |        |     |         |          |  |
|----|-------------|------------|------------|------------|------------|------------|------------|------------|------|--------|-----|---------|----------|--|
| 1  | MGRLLISISFG | LLVVFSLSLG | TGADQDCLPG | WSYFEKYCYK | VFKVKKNWEE | AEKFCTEEVK | DGHLISLHSN | EEVEFMTSLA |      |        |     |         |          |  |
| 81 | FPILK       | YDIVW      | MGLR       | NFWRDC     | PWK        | WSDDAKL    | DYK        | AWSDEPN    | CYGA | MTTDYQ | WLR | WNCNDPR | YFVCKSLA |  |

Supporting Peptides:

| Peptide               | Uniq -10lgP | Mass  | Length    | ppm | m/z | z        | RT      | Fraction | Scan     | Source File               | Area F1 | Area F2 | Area F3  | Area F4 |
|-----------------------|-------------|-------|-----------|-----|-----|----------|---------|----------|----------|---------------------------|---------|---------|----------|---------|
| K.YDIVWMGLR.N         | Y           | 67.55 | 1151.5797 | 9   | 0.6 | 576.7975 | 2 60.05 | 7        | F7:18181 | 17112021_RID_2349_DP7.raw |         |         | 1.1179E5 |         |
| K.YDIVWM(+15.99)GLR.N | Y           | 64.95 | 1167.5747 | 9   | 0.9 | 584.7952 | 2 53.11 | 7        | F7:15854 | 17112021_RID_2349_DP7.raw |         |         |          |         |
| K.WSDDAKLDYK.A        | Y           | 58.85 | 1239.5771 | 10  | 0.7 | 620.7963 | 2 32.61 | 7        | F7:8789  | 17112021_RID_2349_DP7.raw |         |         |          |         |
| K.TTDYQWLR.W          | Y           | 57.81 | 1081.5193 | 8   | 0.1 | 541.7670 | 2 42.38 | 7        | F7:12141 | 17112021_RID_2349_DP7.raw |         |         |          |         |

total 4 pep

TRINITY\_DN554  
[back to list](#)

[Protein Coverage](#) | [Supporting Peptides](#) |

Protein Coverage:

1LSAGKEGRKT MGRFISVSFS LLVVFLSLSG TEAGFCCPNG WSSFGQHCYK VIEPLKNWTD AEKFCTEQHK GSHLASIHSS

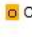

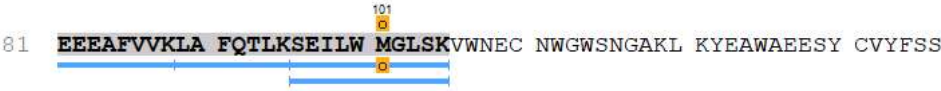

Supporting Peptides:

| Peptide                | Uniq | -10lgP | Mass      | Length | ppm  | m/z      | z | RT    | Fraction | Scan     | Source File               | Area F1  | Area F2  | Area F3 |
|------------------------|------|--------|-----------|--------|------|----------|---|-------|----------|----------|---------------------------|----------|----------|---------|
| K.SEILWMGLSK.V         | Y    | 72.18  | 1162.6056 | 10     | 0.3  | 582.3102 | 2 | 55.68 | 7        | F7:16745 | 17112021_RID_2349_DP7.raw | 9.069E4  | 8.6025E5 |         |
| K.SEILWM(+15.99)GLSK.V | Y    | 64.35  | 1178.6006 | 10     | -0.5 | 590.3073 | 2 | 48.60 | 7        | F7:14258 | 17112021_RID_2349_DP7.raw | 8.1789E3 |          |         |
| H.SSEEEAFVVK.L         | N    | 41.08  | 1123.5397 | 10     | -0.5 | 562.7769 | 2 | 34.73 | 6        | F6:9332  | 17112021_RID_2349_DP6.raw |          |          |         |
| K.LAFQTLK.S            | N    | 39.89  | 819.4854  | 7      | 0.6  | 410.7502 | 2 | 37.72 | 7        | F7:10543 | 17112021_RID_2349_DP7.raw |          |          |         |

total 4

TRINITY\_DN554

[back to list](#)

[Protein Coverage](#) | [Supporting Peptides](#) |

Protein Coverage:

1LSAGKEGRKT MGRFISVSFS LLVVFLSLSG TEAGFCCPNG WSSFGQHCYK VIEPLKNWTD AEKFCTEQHK GSHLASIHSS

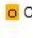

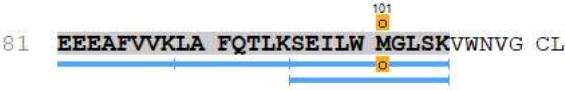

Supporting Peptides:

| Peptide                | Uniq | -10lgP | Mass      | Length | ppm  | m/z      | z | RT    | Fraction | Scan     | Source File               | Area F1  | Area F2  | Area F3 |
|------------------------|------|--------|-----------|--------|------|----------|---|-------|----------|----------|---------------------------|----------|----------|---------|
| K.SEILWMGLSK.V         | Y    | 72.18  | 1162.6056 | 10     | 0.3  | 582.3102 | 2 | 55.68 | 7        | F7:16745 | 17112021_RID_2349_DP7.raw | 9.069E4  | 8.6025E5 |         |
| K.SEILWM(+15.99)GLSK.V | Y    | 64.35  | 1178.6006 | 10     | -0.5 | 590.3073 | 2 | 48.60 | 7        | F7:14258 | 17112021_RID_2349_DP7.raw | 8.1789E3 |          |         |
| H.SSEEEAFVVK.L         | N    | 41.08  | 1123.5397 | 10     | -0.5 | 562.7769 | 2 | 34.73 | 6        | F6:9332  | 17112021_RID_2349_DP6.raw |          |          |         |
| K.LAFQTLK.S            | N    | 39.89  | 819.4854  | 7      | 0.6  | 410.7502 | 2 | 37.72 | 7        | F7:10543 | 17112021_RID_2349_DP7.raw |          |          |         |

total 4

XP\_015666085.1

[back to list](#)

[Protein Coverage](#) | [Supporting Peptides](#) |

Protein Coverage:

1MCKITTALLG LLSLSFFLEL SSCHVRRNAM GSIFRRLKHA LPSQGDPGQP LFLTPYIESG KIEEGRQLSL VEHLPGPHVK

81SYSGYLTVNK THNSNLFFWF FPAQVQPEKT PVLLWLQGGP GGTSMFGLFV EHGPYVVQKN LSLTERKFPW TSKFSMLYID

161NPVGTGFSFT DDPKGYAKNE DDVGRDLISA IIQFFQLFPH YQKNDFYATG ESYAGKYVPA IGYIHSNNP TAKIKINFKG

241VAIGDGLCDP EVMLGGYAEF LYQIGLVDEN QKIYVQNQSN LGQQYIQQKK WKEAFEVFDI LLNSDKTGTP SYIQTVSGCS

321NYFNFMQCQE PEDQEYFGKL LSLPNIRKSI HVGNLTFHDG SVVEEYLLED VMKTIKPWLA VLMDHYRVLL YNGQLDIIVA

401APLTERFLPT VPWGKVKEYK NAERIVWRIH DKDPEVAGYV RQVGFEFYQVI VRGGGHILPY DQPERALDMM DRFIMGKGWK

Supporting Peptides:

| Peptide           | Uniq | -10lgP | Mass      | Length | ppm  | m/z      | z | RT    | Fraction | Scan     | Source File               | Area F1  | Area F2  | Area F3 |
|-------------------|------|--------|-----------|--------|------|----------|---|-------|----------|----------|---------------------------|----------|----------|---------|
| K.NDFYATGESYAGK.Y | Y    | 72.10  | 1421.6099 | 13     | -0.1 | 711.8121 | 2 | 37.11 | 2        | F2:10004 | 12112021_RID_2349_DP2.raw | 1.9882E5 | 1.3335E5 |         |
| R.QVGFEFYQVIVR.G  | Y    | 42.38  | 1336.7139 | 11     | 0.4  | 669.3645 | 2 | 51.49 | 1        | F1:15706 | 12112021_RID_2349_DP1.raw | 1.4401E5 |          |         |
| R.GGGHILPYDQPER.A | Y    | 40.27  | 1437.7001 | 13     | 1.0  | 719.8580 | 2 | 31.99 | 3        | F3:8551  | 17112021_RID_2349_DP3.raw |          | 8.9043E4 |         |

total 3 peptides

XP\_015666086.1

[back to list](#)

[Protein Coverage](#) | [Supporting Peptides](#) |

Protein Coverage:

1 MCKITTALLG LLSLSFFLEL SSCHVRRNAM GSIFRRLKHA LPSQGDGPQP LFLTPYIESG KIEEGRQLSL VEHLPGPHVK

81 SYSGYLTVNK THNSNLFFWF FPAQVQPEKT PVLLWLQGGP GGTSMFGLFV EHGPYVVQKN LSLTERKFPW TSKFSMLYID

161 NPVGTGFSFT DDPKGYAKNE DDVGRDLYSA IIQFFQLFPH YQKNDFYATG ESYAGKYVPA IGYIHSNNP TAKIKINFKG

241 VAIGDGLCDP EVMLGGYAEF LYQIGLVDEN QKIYVQNQSN LGQQYIQQKK WKEAFEVFDI LLNSDKTGTP SYIQTVSGCS

321 NYFNFMQCQE PEDQEYFGKL LSLPNIRKSI HVGNLTFHDG SVVEEYLLD VMKTIKPWLA VLMDHYRVLL YNGQLDIIVA

401 APLTERFLPT VPWGKVKEYK NAERIVWRIH DKDPEVAGYV RQVGEFYQVI VRGGGHILPY DQPERALDMM DRFIMGKGWK

Supporting Peptides:

| Peptide             | Uniq -10lgP | Mass      | Length | ppm  | m/z      | z | RT    | Fraction | Scan     | Source File               | Area F1  | Area F2  | Area F3  |
|---------------------|-------------|-----------|--------|------|----------|---|-------|----------|----------|---------------------------|----------|----------|----------|
| K.NDFYATGESYAGK.Y Y | 72.10       | 1421.6099 | 13     | -0.1 | 711.8121 | 2 | 37.11 | 2        | F2:10004 | 12112021_RID_2349_DP2.raw | 1.9882E5 | 1.3335E5 |          |
| R.QVGEFYQVIVR.G Y   | 42.38       | 1336.7139 | 11     | 0.4  | 669.3645 | 2 | 51.49 | 1        | F1:15706 | 12112021_RID_2349_DP1.raw | 1.4401E5 |          |          |
| R.GGGHILPYDQPER.A Y | 40.27       | 1437.7001 | 13     | 1.0  | 719.8580 | 2 | 31.99 | 3        | F3:8551  | 17112021_RID_2349_DP3.raw |          |          | 8.9043E4 |
| total 3 peptides    |             |           |        |      |          |   |       |          |          |                           |          |          |          |

XP\_034258446.1  
[back to list](#)

| [Protein Coverage](#) | [Supporting Peptides](#) |  
Protein Coverage:

1 MCKITTVLLA LLSLSFSLEL SSCHVRWSAM GNIFRRLKYA LPSQGDGPQP LFLTPYIESG KTEEGRQLSL VEHLPGPNVK

81 SYSGYLTVNK TYNNNLFFWF FPAQVQPEKA PVLLWLQGGP GGTSMFGLFV EHGPYVVQKN LSLTERKFPW TSKFSMLYID

161 NPVGTGFSFT DDPKGYAKNE VDVGRDLYSA IVQFFQLFPD YQKNDFYATG ESYAGKYVPA IGYIHSNNP TAKIKINFKG

241 VAIGDGLCDP EVMLGGYAEF LYQIGLVDEK QRIYVQNQTN LGQKYIQQKK WKEAFEVFDT LLNGDKTGSS PYIQTVTGCS

321 NYFNFLQCEE PEDQEYFGKL LSLPNIRKSI HVGNLTFHDG SIVEEHLIED VMKTIKPWLA VLMDHYRVLL YNGQLDIIVA

401 APLTERFLPT VPWGKVKEYK NAERIVWRIH DKDPEVAGYV RQVGEFYQVI VRGGGHILPY DQPERALDMM DRFIMGKEWK

481 QSRYGK

Supporting Peptides:

| Peptide             | Uniq -10lgP | Mass      | Length | ppm  | m/z      | z | RT    | Fraction | Scan     | Source File               | Area F1  | Area F2  | Area F3  |
|---------------------|-------------|-----------|--------|------|----------|---|-------|----------|----------|---------------------------|----------|----------|----------|
| K.NDFYATGESYAGK.Y Y | 72.10       | 1421.6099 | 13     | -0.1 | 711.8121 | 2 | 37.11 | 2        | F2:10004 | 12112021_RID_2349_DP2.raw | 1.9882E5 | 1.3335E5 |          |
| R.QVGEFYQVIVR.G Y   | 42.38       | 1336.7139 | 11     | 0.4  | 669.3645 | 2 | 51.49 | 1        | F1:15706 | 12112021_RID_2349_DP1.raw | 1.4401E5 |          |          |
| R.GGGHILPYDQPER.A Y | 40.27       | 1437.7001 | 13     | 1.0  | 719.8580 | 2 | 31.99 | 3        | F3:8551  | 17112021_RID_2349_DP3.raw |          |          | 8.9043E4 |
| total 3 peptides    |             |           |        |      |          |   |       |          |          |                           |          |          |          |

XP\_034258445.1  
[back to list](#)

| [Protein Coverage](#) | [Supporting Peptides](#) |  
Protein Coverage:

1 MCKITTVLLA LLSLSFSLEL SSCHVRWSAM GNIFRRLKYA LPSQGDGPQP LFLTPYIESG KTEEGRQLSL VEHLPGPNVK

81 SYSGYLTVNK TYNNNLFFWF FPAQVQPEKA PVLLWLQGGP GGTSMFGLFV EHGPYVVQKN LSLTERKFPW TSKFSMLYID

161 NPVGTGFSFT DDPKGYAKNE VDVGRDLYSA IVQFFQLFPD YQKNDFYATG ESYAGKYVPA IGYIHSNNP TAKIKINFKG

241 VAIGDGLCDP EVMLGGYAEF LYQIGLVDEK QRIYVQNQTN LGQKYIQQKK WKEAFEVFDT LLNGDKTGSS PYIQTVTGCS

321 NYFNFLQCEE PEDQEYFGKL LSLPNIRKSI HVGNLTFHDG SIVEEHLIED VMKTIKPWLA VLMDHYRVLL YNGQLDIIVA

401 APLTERFLPT VPWGKVKEYK NAERIVWRIH DKDPEVAGYV RQVGEFYQVI VRGGGHILPY DQPERALDMM DRFIMGKEWK

481 QSRYGK

Supporting Peptides:

| Peptide             | Uniq -10lgP | Mass      | Length | ppm  | m/z      | z | RT    | Fraction | Scan     | Source File               | Area F1  | Area F2  | Area F3  |
|---------------------|-------------|-----------|--------|------|----------|---|-------|----------|----------|---------------------------|----------|----------|----------|
| K.NDFYATGESYAGK.Y Y | 72.10       | 1421.6099 | 13     | -0.1 | 711.8121 | 2 | 37.11 | 2        | F2:10004 | 12112021_RID_2349_DP2.raw | 1.9882E5 | 1.3335E5 |          |
| R.QVGEFYQVIVR.G Y   | 42.38       | 1336.7139 | 11     | 0.4  | 669.3645 | 2 | 51.49 | 1        | F1:15706 | 12112021_RID_2349_DP1.raw | 1.4401E5 |          |          |
| R.GGGHILPYDQPER.A Y | 40.27       | 1437.7001 | 13     | 1.0  | 719.8580 | 2 | 31.99 | 3        | F3:8551  | 17112021_RID_2349_DP3.raw |          |          | 8.9043E4 |
| total 3 peptides    |             |           |        |      |          |   |       |          |          |                           |          |          |          |

XP\_034258444.1  
[back to list](#)

| [Protein Coverage](#) | [Supporting Peptides](#) |  
Protein Coverage:

|     |            |            |            |            |            |                                   |            |            |            |  |  |  |  |
|-----|------------|------------|------------|------------|------------|-----------------------------------|------------|------------|------------|--|--|--|--|
| 1   | MCKITTVLLA | LLSLSFSLEL | SSCHVRWSAM | GNIFRRLKYA | LPSQGDPGQP | LFLTPYIESG                        | KTEEGRQLSL | VEHLPGPNVK |            |  |  |  |  |
| 81  | SYSGYLTVNK | TYNNNLFFWF | FPAQVQPEKA | PVLLWLQGGP | GGTSMFGLFV | EHGPyVVQKN                        | LSLTERKFPW | TSKFMSLYID |            |  |  |  |  |
| 161 | NPVGTGFSFT | DDPKGYAKNE | VDVGRDLYSA | IVQFFQLFPD | YQK        | <b>NDFYATG ESYAGK</b>             | YVPA       | IGYYIHSNNP | TAKIKINFKG |  |  |  |  |
| 241 | VAIGDGLCDP | EVMLGGYAEF | LYQIGLVDEK | QRIYVQNQTN | LGQKYIQQKK | WKEAFEVFDT                        | LLNGDKTGSS | PYIQTVTGCS |            |  |  |  |  |
| 321 | NYFNFLQCEE | PEDQEYFGKL | LSLPNIRKSI | HVGNLTFHDG | SIVEEHLIED | VMKTIKPWLA                        | VLMDHYRVLL | YNGQLDIIVA |            |  |  |  |  |
| 401 | APLTERFLPT | VPWGVKEYK  | NAERIVWRIH | DKDPEVAGYV | R          | <b>QVGEFYQVI VRGGGHILPY DQPER</b> | ALDMM      | DRFIMGKEWK |            |  |  |  |  |
| 481 | QSRYGK     |            |            |            |            |                                   |            |            |            |  |  |  |  |

Supporting Peptides:

| Peptide           | Uniq | -10lgP | Mass      | Length | ppm  | m/z      | z | RT    | Fraction | Scan     | Source File               | Area F1  | Area F2  | Area F3  |
|-------------------|------|--------|-----------|--------|------|----------|---|-------|----------|----------|---------------------------|----------|----------|----------|
| K.NDFYATGESYAGK.Y | Y    | 72.10  | 1421.6099 | 13     | -0.1 | 711.8121 | 2 | 37.11 | 2        | F2:10004 | 12112021_RID_2349_DP2.raw | 1.9882E5 | 1.3335E5 |          |
| R.QVGEFYQVIVR.G   | Y    | 42.38  | 1336.7139 | 11     | 0.4  | 669.3645 | 2 | 51.49 | 1        | F1:15706 | 12112021_RID_2349_DP1.raw | 1.4401E5 |          |          |
| R.GGGHILPYDQPER.A | Y    | 40.27  | 1437.7001 | 13     | 1.0  | 719.8580 | 2 | 31.99 | 3        | F3:8551  | 17112021_RID_2349_DP3.raw |          |          | 8.9043E4 |
| total 3 peptides  |      |        |           |        |      |          |   |       |          |          |                           |          |          |          |

XP\_032092626.1  
[back to list](#)

| [Protein Coverage](#) | [Supporting Peptides](#) |  
Protein Coverage:

|     |            |            |            |            |            |                                   |            |            |            |  |  |  |  |
|-----|------------|------------|------------|------------|------------|-----------------------------------|------------|------------|------------|--|--|--|--|
| 1   | MCKITALLAL | LSLIFSLELS | SCHVRWSAMG | SIFRRLKYAL | PSQGDPGQPL | FLTPYIESGE                        | TEEGRQLSLV | EHLPGPNVKS |            |  |  |  |  |
| 81  | YSGYLTVNKT | YNSNLFFWFF | PAQFQPEKAP | VLLWLQGGPG | GTSMFGLFVE | HGPyVVQKNL                        | SLTERKFPWT | SKFSMLYIDN |            |  |  |  |  |
| 161 | PVGTGFSFTD | DPKGYAKNED | DVGRDLYSAI | VQFFQLFPDY | QK         | <b>NDFYATGE SYAGK</b>             | YVPAI      | GYIHSNNPT  | AKIKINFKGV |  |  |  |  |
| 241 | AIGDGLCDPE | VMLGGYAEFL | YQIGLLDEKQ | KIYVQNQTNL | GQQYIQQKKW | KEAFEVFDTL                        | LNGDKTGSP  | YVDTVTGCSN |            |  |  |  |  |
| 321 | YFNFLKCEEP | EDQKYFGKLL | SLPNIRKSIH | VGNLTFHDGS | MVEEHLVEDI | MKTIKPWLAV                        | LMDHYKVLLY | NGQLDIIVAA |            |  |  |  |  |
| 401 | PLTERFLPTV | PWGKVKEYKN | AERIIWRIHD | KDPEVAGYVR |            | <b>QVGEFYQVIV RGGGHILPYD QPER</b> | ALDMM      | RFIMGKEWK  |            |  |  |  |  |

Supporting Peptides:

| Peptide           | Uniq | -10lgP | Mass      | Length | ppm  | m/z      | z | RT    | Fraction | Scan     | Source File               | Area F1  | Area F2  | Area F3  |
|-------------------|------|--------|-----------|--------|------|----------|---|-------|----------|----------|---------------------------|----------|----------|----------|
| K.NDFYATGESYAGK.Y | Y    | 72.10  | 1421.6099 | 13     | -0.1 | 711.8121 | 2 | 37.11 | 2        | F2:10004 | 12112021_RID_2349_DP2.raw | 1.9882E5 | 1.3335E5 |          |
| R.QVGEFYQVIVR.G   | Y    | 42.38  | 1336.7139 | 11     | 0.4  | 669.3645 | 2 | 51.49 | 1        | F1:15706 | 12112021_RID_2349_DP1.raw | 1.4401E5 |          |          |
| R.GGGHILPYDQPER.A | Y    | 40.27  | 1437.7001 | 13     | 1.0  | 719.8580 | 2 | 31.99 | 3        | F3:8551  | 17112021_RID_2349_DP3.raw |          |          | 8.9043E4 |
| total 3 peptides  |      |        |           |        |      |          |   |       |          |          |                           |          |          |          |

XP\_032092625.1  
[back to list](#)

| [Protein Coverage](#) | [Supporting Peptides](#) |  
Protein Coverage:

|     |            |            |            |            |            |                                   |            |            |            |  |  |  |  |
|-----|------------|------------|------------|------------|------------|-----------------------------------|------------|------------|------------|--|--|--|--|
| 1   | MCKITALLAL | LSLIFSLELS | SCHVRWSAMG | SIFRRLKYAL | PSQGDPGQPL | FLTPYIESGE                        | TEEGRQLSLV | EHLPGPNVKS |            |  |  |  |  |
| 81  | YSGYLTVNKT | YNSNLFFWFF | PAQFQPEKAP | VLLWLQGGPG | GTSMFGLFVE | HGPyVVQKNL                        | SLTERKFPWT | SKFSMLYIDN |            |  |  |  |  |
| 161 | PVGTGFSFTD | DPKGYAKNED | DVGRDLYSAI | VQFFQLFPDY | QK         | <b>NDFYATGE SYAGK</b>             | YVPAI      | GYIHSNNPT  | AKIKINFKGV |  |  |  |  |
| 241 | AIGDGLCDPE | VMLGGYAEFL | YQIGLLDEKQ | KIYVQNQTNL | GQQYIQQKKW | KEAFEVFDTL                        | LNGDKTGSP  | YVDTVTGCSN |            |  |  |  |  |
| 321 | YFNFLKCEEP | EDQKYFGKLL | SLPNIRKSIH | VGNLTFHDGS | MVEEHLVEDI | MKTIKPWLAV                        | LMDHYKVLLY | NGQLDIIVAA |            |  |  |  |  |
| 401 | PLTERFLPTV | PWGKVKEYKN | AERIIWRIHD | KDPEVAGYVR |            | <b>QVGEFYQVIV RGGGHILPYD QPER</b> | ALDMM      | RFIMGKEWK  |            |  |  |  |  |

Supporting Peptides:

| Peptide           | Uniq | -10lgP | Mass      | Length | ppm  | m/z      | z | RT    | Fraction | Scan     | Source File               | Area F1  | Area F2  | Area F3  |
|-------------------|------|--------|-----------|--------|------|----------|---|-------|----------|----------|---------------------------|----------|----------|----------|
| K.NDFYATGESYAGK.Y | Y    | 72.10  | 1421.6099 | 13     | -0.1 | 711.8121 | 2 | 37.11 | 2        | F2:10004 | 12112021_RID_2349_DP2.raw | 1.9882E5 | 1.3335E5 |          |
| R.QVGEFYQVIVR.G   | Y    | 42.38  | 1336.7139 | 11     | 0.4  | 669.3645 | 2 | 51.49 | 1        | F1:15706 | 12112021_RID_2349_DP1.raw | 1.4401E5 |          |          |
| R.GGGHILPYDQPER.A | Y    | 40.27  | 1437.7001 | 13     | 1.0  | 719.8580 | 2 | 31.99 | 3        | F3:8551  | 17112021_RID_2349_DP3.raw |          |          | 8.9043E4 |
| total 3 peptides  |      |        |           |        |      |          |   |       |          |          |                           |          |          |          |

XP\_032092628.1  
[back to list](#)

| [Protein Coverage](#) | [Supporting Peptides](#) |  
Protein Coverage:

1 MCKITALLAL LSLIFSLELS SCHVRWSAMG SIFRRLKYAL PSQGDPGQPL FLTPYIESGE TEEGRQLSLV EHLPGPNVKS

81 YSGYLTVNKT YNSNLFFWFF PAQFQPEKAP VLLWLQGGPG GTSMFGLFVE HGPYVVQKNL SLTERKFPWT SKFSMLYIDN

161 PVGTGFSFTD DPKGYAKNED DVGRDLYSAI VQFFQLFPDY QKNDIFYATGE SYAGKYVPAI GYYIHSNNPT AKIKINFKGV

241 AIGDGLCDPE VMLGGYAEFL YQIGLLDEKQ KIYVQNQTNL GQQYIQKKW KEAFEVFDL LNGDKTGSP YVDTVTCNS

321 YFNFLKCEEP EDQKYFGKLL SLPNIRKSIH VGNLTFHDGS MVEEHLVEDI MKTIKPWLAV LMDHYKVLLY NGQLDIIVAA

401 PLTERFLPTV PWGKVKEYKN AERIIWRIHD KDPEVAGYVR QVGEFYQVIV RGGGHILPYD QPERALDMMDFRIMGKEWK

Supporting Peptides:

| Peptide           | Uniq | -10lgP | Mass      | Length | ppm  | m/z      | z | RT    | Fraction | Scan     | Source File               | Area F1  | Area F2          | Area F3  |
|-------------------|------|--------|-----------|--------|------|----------|---|-------|----------|----------|---------------------------|----------|------------------|----------|
| K.NDFYATGESYAGK.Y | Y    | 72.10  | 1421.6099 | 13     | -0.1 | 711.8121 | 2 | 37.11 | 2        | F2:10004 | 12112021_RID_2349_DP2.raw | 1.9882E5 | 1.3335E5         |          |
| R.QVGEFYQVIVR.G   | Y    | 42.38  | 1336.7139 | 11     | 0.4  | 669.3645 | 2 | 51.49 | 1        | F1:15706 | 12112021_RID_2349_DP1.raw | 1.4401E5 |                  |          |
| R.GGGHILPYDQPER.A | Y    | 40.27  | 1437.7001 | 13     | 1.0  | 719.8580 | 2 | 31.99 | 3        | F3:8551  | 17112021_RID_2349_DP3.raw |          |                  | 8.9043E4 |
|                   |      |        |           |        |      |          |   |       |          |          |                           |          | total 3 peptides |          |

XP\_013922774.1  
[back to list](#)

[| Protein Coverage](#) | [Supporting Peptides](#) |  
Protein Coverage:

1 MCKITALLAL LSLIFSLELS SCHVRWSAMG SIFRRLKYAL PSQGDPGQPL FLTPYIESGE TEEGRQLSLV EHLPGPNVKS

81 YSGYLTVNKT YNSNLFFWFF PAQFQPEKAP VLLWLQGGPG GTSMFGLFVE HGPYVVQKNL SLTERKFPWT SKFSMLYIDN

161 PVGTGFSFTD DPKGYAKNED DVGRDLYSAI VQFFQLFPDY QKNDIFYATGE SYAGKYVPAI GYYIHSNNPT AKIKINFKGV

241 AIGDGLCDPE VMLGGYAEFL YQIGLLDEKQ KIYVQNQTNL GQQYIQKKW KEAFEVFDL LNGDKTGSP YVDTVTCNS

321 YFNFLKCEEP EDQKYFGKLL SLPNIRKSIH VGNLTFHDGS MVEEHLVEDI MKTIKPWLAV LMDHYKVLLY NGQLDIIVAA

401 PLTERFLPTV PWGKVKEYKD AERIIWRIHD KDPEVAGYVR QVGEFYQVIV RGGGHILPYD QPERALDMMDFRIMGKEWK

Supporting Peptides:

| Peptide           | Uniq | -10lgP | Mass      | Length | ppm  | m/z      | z | RT    | Fraction | Scan     | Source File               | Area F1  | Area F2          | Area F3  |
|-------------------|------|--------|-----------|--------|------|----------|---|-------|----------|----------|---------------------------|----------|------------------|----------|
| K.NDFYATGESYAGK.Y | Y    | 72.10  | 1421.6099 | 13     | -0.1 | 711.8121 | 2 | 37.11 | 2        | F2:10004 | 12112021_RID_2349_DP2.raw | 1.9882E5 | 1.3335E5         |          |
| R.QVGEFYQVIVR.G   | Y    | 42.38  | 1336.7139 | 11     | 0.4  | 669.3645 | 2 | 51.49 | 1        | F1:15706 | 12112021_RID_2349_DP1.raw | 1.4401E5 |                  |          |
| R.GGGHILPYDQPER.A | Y    | 40.27  | 1437.7001 | 13     | 1.0  | 719.8580 | 2 | 31.99 | 3        | F3:8551  | 17112021_RID_2349_DP3.raw |          |                  | 8.9043E4 |
|                   |      |        |           |        |      |          |   |       |          |          |                           |          | total 3 peptides |          |

XP\_032092627.1  
[back to list](#)

[| Protein Coverage](#) | [Supporting Peptides](#) |  
Protein Coverage:

1 MCKITALLAL LSLIFSLELS SCHVRWSAMG SIFRRLKYAL PSQGDPGQPL FLTPYIESGE TEEGRQLSLV EHLPGPNVKS

81 YSGYLTVNKT YNSNLFFWFF PAQFQPEKAP VLLWLQGGPG GTSMFGLFVE HGPYVVQKNL SLTERKFPWT SKFSMLYIDN

161 PVGTGFSFTD DPKGYAKNED DVGRDLYSAI VQFFQLFPDY QKNDIFYATGE SYAGKYVPAI GYYIHSNNPT AKIKINFKGV

241 AIGDGLCDPE VMLGGYAEFL YQIGLLDEKQ KIYVQNQTNL GQQYIQKKW KEAFEVFDL LNGDKTGSP YVDTVTCNS

321 YFNFLKCEEP EDQKYFGKLL SLPNIRKSIH VGNLTFHDGS MVEEHLVEDI MKTIKPWLAV LMDHYKVLLY NGQLDIIVAA

401 PLTERFLPTV PWGKVKEYKN AERIIWRIHD KDPEVAGYVR QVGEFYQVIV RGGGHILPYD QPERALDMMDFRIMGKEWK

Supporting Peptides:

| Peptide           | Uniq | -10lgP | Mass      | Length | ppm  | m/z      | z | RT    | Fraction | Scan     | Source File               | Area F1  | Area F2          | Area F3  |
|-------------------|------|--------|-----------|--------|------|----------|---|-------|----------|----------|---------------------------|----------|------------------|----------|
| K.NDFYATGESYAGK.Y | Y    | 72.10  | 1421.6099 | 13     | -0.1 | 711.8121 | 2 | 37.11 | 2        | F2:10004 | 12112021_RID_2349_DP2.raw | 1.9882E5 | 1.3335E5         |          |
| R.QVGEFYQVIVR.G   | Y    | 42.38  | 1336.7139 | 11     | 0.4  | 669.3645 | 2 | 51.49 | 1        | F1:15706 | 12112021_RID_2349_DP1.raw | 1.4401E5 |                  |          |
| R.GGGHILPYDQPER.A | Y    | 40.27  | 1437.7001 | 13     | 1.0  | 719.8580 | 2 | 31.99 | 3        | F3:8551  | 17112021_RID_2349_DP3.raw |          |                  | 8.9043E4 |
|                   |      |        |           |        |      |          |   |       |          |          |                           |          | total 3 peptides |          |

JAV50864.1  
[back to list](#)

[| Protein Coverage](#) | [Supporting Peptides](#) |  
Protein Coverage:

|     |            |            |            |            |            |            |            |            |            |            |  |  |  |
|-----|------------|------------|------------|------------|------------|------------|------------|------------|------------|------------|--|--|--|
| 1   | MCKITTALLG | LLSLSFFLEL | SSCHVRWNAI | GSIFRRLKHA | LPSQGDGPQP | LFLTPYIESG | KIEEGRQLSL | VEHLPGPHVK |            |            |  |  |  |
| 81  | SYSGYLTVNK | THNSNLFFWF | FPAQVQPEKT | PVLLWLQGGP | GGTSMFGLFV | EHGPYVVQKN | LSLTERKFPW | TSKFMSLYID |            |            |  |  |  |
| 161 | NPVGTGFSFT | DDPKGYAKNE | DDVGRDLYSA | IIQFFQLFPH | YQK        | NDFYATG    | ESYAGK     | YVPA       | IGYYIHSNNP | TAKIKINFKG |  |  |  |
| 241 | VAIGDGLCDP | EVMLGGYAEF | LYQIGLVDEN | QRIYVQNQSN | LGQQYIQQKK | WKEAFEVFDI | LLNGDKTGTP | SYIQTVSGCS |            |            |  |  |  |
| 321 | NYFNFMQCQE | PEDQEYFGKL | LSLPNIRKSI | HVGNLTFHDG | SMVEEYLLED | IMKTIKPWLA | VLMDHYRVLL | YNGQLDIIVA |            |            |  |  |  |
| 401 | APLTERFLPT | VPWGKVKEYK | NAERIVWRIH | DKDPEVAGYV | R          | QVGEFYQVI  | VRGGGHILPY | DQPER      | ALDMM      | DRFIMKGWK  |  |  |  |
| 481 | Q          | SRYGK      |            |            |            |            |            |            |            |            |  |  |  |

Supporting Peptides:

| Peptide           | Uniq | -10lgP | Mass      | Length | ppm  | m/z      | z | RT    | Fraction | Scan     | Source File               | Area F1  | Area F2  | Area F3  |
|-------------------|------|--------|-----------|--------|------|----------|---|-------|----------|----------|---------------------------|----------|----------|----------|
| K.NDFYATGESYAGK.Y | Y    | 72.10  | 1421.6099 | 13     | -0.1 | 711.8121 | 2 | 37.11 | 2        | F2:10004 | 12112021_RID_2349_DP2.raw | 1.9882E5 | 1.3335E5 |          |
| R.QVGEFYQVIVR.G   | Y    | 42.38  | 1336.7139 | 11     | 0.4  | 669.3645 | 2 | 51.49 | 1        | F1:15706 | 12112021_RID_2349_DP1.raw | 1.4401E5 |          |          |
| R.GGGHILPYDQPER.A | Y    | 40.27  | 1437.7001 | 13     | 1.0  | 719.8580 | 2 | 31.99 | 3        | F3:8551  | 17112021_RID_2349_DP3.raw |          |          | 8.9043E4 |
| total 3 peptides  |      |        |           |        |      |          |   |       |          |          |                           |          |          |          |

JAI13760.1  
[back to list](#)

[Protein Coverage](#) | [Supporting Peptides](#) |  
Protein Coverage:

|     |            |            |            |            |            |            |            |            |            |            |  |  |  |
|-----|------------|------------|------------|------------|------------|------------|------------|------------|------------|------------|--|--|--|
| 1   | MCKITTALLC | LLSLSFFLEL | SSCHVRRNAI | GSIFRRLKHA | LPSQGDGPQP | LFLTPYIESG | KIEEGRQLSL | VEHLPGPHVK |            |            |  |  |  |
| 81  | SYSGYLTVNK | THNSNLFFWF | FPAQVQPEKT | PVLLWLQGGP | GGTSMFGLFV | EHGPYVVQKN | LSLTERKFPW | TSKFMSLYID |            |            |  |  |  |
| 161 | NPVGTGFSFT | DDPKGYAKNE | DDVGRDLYSA | IIQFFQLFPH | YQK        | NDFYATG    | ESYAGK     | YVPA       | IGYYIHSNNP | TAKIKINFKG |  |  |  |
| 241 | VAIGDGLCDP | EVMLGGYADF | LYQIGLVDEN | QRIYVQNQSN | LGQQYIQQKK | WKEAFEVFDI | LLNDDKTGTP | SYIQTISGCS |            |            |  |  |  |
| 321 | NYFNFMQCQE | PEDQEYFGKL | LSLPNIRKSI | HVGNLTFHDG | SMVEEYLLED | IMKTIKPWLA | VLMDHYRVLI | YNGQLDIIVA |            |            |  |  |  |
| 401 | APLTERFLPT | VPWGKVKEYK | NAERIVWRIH | DKDPEVAGYV | R          | QVGEFYQVI  | VRGGGHILPY | DQPER      | ALDMM      | DRFIMKGWK  |  |  |  |
| 481 | Q          | SRYGK      |            |            |            |            |            |            |            |            |  |  |  |

Supporting Peptides:

| Peptide           | Uniq | -10lgP | Mass      | Length | ppm  | m/z      | z | RT    | Fraction | Scan     | Source File               | Area F1  | Area F2  | Area F3  |
|-------------------|------|--------|-----------|--------|------|----------|---|-------|----------|----------|---------------------------|----------|----------|----------|
| K.NDFYATGESYAGK.Y | Y    | 72.10  | 1421.6099 | 13     | -0.1 | 711.8121 | 2 | 37.11 | 2        | F2:10004 | 12112021_RID_2349_DP2.raw | 1.9882E5 | 1.3335E5 |          |
| R.QVGEFYQVIVR.G   | Y    | 42.38  | 1336.7139 | 11     | 0.4  | 669.3645 | 2 | 51.49 | 1        | F1:15706 | 12112021_RID_2349_DP1.raw | 1.4401E5 |          |          |
| R.GGGHILPYDQPER.A | Y    | 40.27  | 1437.7001 | 13     | 1.0  | 719.8580 | 2 | 31.99 | 3        | F3:8551  | 17112021_RID_2349_DP3.raw |          |          | 8.9043E4 |
| total 3 peptides  |      |        |           |        |      |          |   |       |          |          |                           |          |          |          |

AFJ49766.1  
[back to list](#)

[Protein Coverage](#) | [Supporting Peptides](#) |  
Protein Coverage:

|     |            |            |            |            |            |            |            |            |            |            |  |  |  |
|-----|------------|------------|------------|------------|------------|------------|------------|------------|------------|------------|--|--|--|
| 1   | MCKITTALLC | LLSLSFFLEL | SSCHVRRNAI | GSIFRRLKHA | LPSQGDGPQP | LFLTPYIESG | KIEEGRQLSL | VEHLPGPHVK |            |            |  |  |  |
| 81  | SYSGYLTVNK | THNSNLFFWF | FPAQVQPEKT | PVLLWLQGGP | GGTSMFGLFV | EHGPYVVQKN | LSLTERKFPW | TSKFMSLYID |            |            |  |  |  |
| 161 | NPVGTGFSFT | DDPKGYAKNE | DDVGRDLYSA | IIQFFQLFPH | YQK        | NDFYATG    | ESYAGK     | YVPA       | IGYYIHSNNP | TAKIKINFKG |  |  |  |
| 241 | VAIGDGLCDP | EVMLGGYADF | LYQIGLVDEN | QRIYVQNQSN | LGQQYIQQKK | WKEAFEVFDI | LLNDDKTGTP | SYIQTISGCS |            |            |  |  |  |
| 321 | NYFNFMQCQE | PEDQEYFGKL | LSLPNIRKSI | HVGNLTFHDG | SMVEEYLLED | IMKTIKPWLA | VLMDHYRVLI | YNGQLDIIVA |            |            |  |  |  |
| 401 | APLTERFLPT | VPWGKVKEYK | NAERIVWRIH | DKDPEVAGYV | R          | QVGEFYQVI  | VRGGGHILPY | DQPER      | ALDMM      | DRFIMKGWK  |  |  |  |
| 481 | Q          | SRYGK      |            |            |            |            |            |            |            |            |  |  |  |

Supporting Peptides:

| Peptide           | Uniq | -10lgP | Mass      | Length | ppm  | m/z      | z | RT    | Fraction | Scan     | Source File               | Area F1  | Area F2  | Area F3  |
|-------------------|------|--------|-----------|--------|------|----------|---|-------|----------|----------|---------------------------|----------|----------|----------|
| K.NDFYATGESYAGK.Y | Y    | 72.10  | 1421.6099 | 13     | -0.1 | 711.8121 | 2 | 37.11 | 2        | F2:10004 | 12112021_RID_2349_DP2.raw | 1.9882E5 | 1.3335E5 |          |
| R.QVGEFYQVIVR.G   | Y    | 42.38  | 1336.7139 | 11     | 0.4  | 669.3645 | 2 | 51.49 | 1        | F1:15706 | 12112021_RID_2349_DP1.raw | 1.4401E5 |          |          |
| R.GGGHILPYDQPER.A | Y    | 40.27  | 1437.7001 | 13     | 1.0  | 719.8580 | 2 | 31.99 | 3        | F3:8551  | 17112021_RID_2349_DP3.raw |          |          | 8.9043E4 |
| total 3 peptides  |      |        |           |        |      |          |   |       |          |          |                           |          |          |          |

JAG47096.1  
[back to list](#)

[Protein Coverage](#) | [Supporting Peptides](#) |  
Protein Coverage:

1 MCKITTALLG LLSLSFFLEL SSCHVRRNAI GSIFRRLKHA LPSQGDGPQP LFLTPYIESG KIEEGRQLSL VEHLPGPHVK

81 SYSGYLTVNK THNSNLFFWF FPAQVQPEKT PVLLWLQGGP GGTSMFGLFV EHGPYVVQKN LSLTERKFPW TSKFSMLYVD

161 NPVGTGFSFT DDPKGYAKNE DDVGRDLYSA IIQFFQLFPH YQK**NDFYATG ESYAGK**YVPA IGYIHSNNP TAKIKINFKG

241 VAIGDGLCDP EVMLGGYADF LYQIGLVDEN QRIYVQNQSN LGQQYIQQKK WKEAVEVFDI LLNDDKTGTP SYIQTISGCS

321 NYFNFMQCQE PEDQEYFGKL LSLPNIRKSI HVGNLTFHDG SMVEEYLLD IMKTIKPWLA VLMDHYRVL IYNGQLDIIVA

401 APLTERFLPT VPWGKVKEYK NAERIVWRIH DKDPEVAGYV R**QVGGEFYQVI VRGGGHILPY DQPER**ALDMM DRFIMKGWK

481 QSRYGK

Supporting Peptides:

| Peptide           | Uniq | -10lgP | Mass      | Length | ppm  | m/z      | z | RT    | Fraction | Scan     | Source File               | Area F1  | Area F2  | Area F3  |
|-------------------|------|--------|-----------|--------|------|----------|---|-------|----------|----------|---------------------------|----------|----------|----------|
| K.NDFYATGESYAGK.Y | Y    | 72.10  | 1421.6099 | 13     | -0.1 | 711.8121 | 2 | 37.11 | 2        | F2:10004 | 12112021_RID_2349_DP2.raw | 1.9882E5 | 1.3335E5 |          |
| R.QVGGEFYQVIVR.G  | Y    | 42.38  | 1336.7139 | 11     | 0.4  | 669.3645 | 2 | 51.49 | 1        | F1:15706 | 12112021_RID_2349_DP1.raw | 1.4401E5 |          |          |
| R.GGGHILPYDQPER.A | Y    | 40.27  | 1437.7001 | 13     | 1.0  | 719.8580 | 2 | 31.99 | 3        | F3:8551  | 17112021_RID_2349_DP3.raw |          |          | 8.9043E4 |
| total 3 peptides  |      |        |           |        |      |          |   |       |          |          |                           |          |          |          |

TRINITY\_DN8397  
[back to list](#)

| [Protein Coverage](#) | [Supporting Peptides](#) |  
Protein Coverage:

1 MCKITTALLG LLSLSFFLEL SSCHVRRGAM GSIFRRLKYA LPSQGDGPQP LFLTPYIESG KIEEGRQLSL VEHLPGPHVK

81 SYSGYLTVNK THNSNLFFWF FPAQVQPEKT PVLLWLQGGP GGTSMFGLFV EHGPYVVQKN LSLTERKFPW TSKFSMLYID

161 NPVGTGFSFT DDPKGYAKNE DDVGRDLYSA IVQFFQLFPQ YQK**NDFYATG ESYAGK**YVPA IGYIHSNNP TAKIKINFKG

241 VAIGDGLCDP EVMLGGYADF LYQIGLVDEK QRIYVQNQSD LGQQYIQQKK WKEAFEVFDI LLNGDKTGSP PYIETVSGCS

321 NYFNFLQCQD PEDQKYFGKL LSLPNIRKSI HVGNLTFHDG SMVEEYLIED IMKTIKPWLA VLMDHYRVLL YNGQLDIIVA

401 APLTERFLPT VPWGKVKEYK NAERIVWRIH DKDPEVAGYV R**QVGGEFYQVI VRGGGHILPY DQPER**ALDMM DRFIMKGWK

481 QSGYGK

Supporting Peptides:

| Peptide           | Uniq | -10lgP | Mass      | Length | ppm  | m/z      | z | RT    | Fraction | Scan     | Source File               | Area F1  | Area F2  | Area F3  |
|-------------------|------|--------|-----------|--------|------|----------|---|-------|----------|----------|---------------------------|----------|----------|----------|
| K.NDFYATGESYAGK.Y | Y    | 72.10  | 1421.6099 | 13     | -0.1 | 711.8121 | 2 | 37.11 | 2        | F2:10004 | 12112021_RID_2349_DP2.raw | 1.9882E5 | 1.3335E5 |          |
| R.QVGGEFYQVIVR.G  | Y    | 42.38  | 1336.7139 | 11     | 0.4  | 669.3645 | 2 | 51.49 | 1        | F1:15706 | 12112021_RID_2349_DP1.raw | 1.4401E5 |          |          |
| R.GGGHILPYDQPER.A | Y    | 40.27  | 1437.7001 | 13     | 1.0  | 719.8580 | 2 | 31.99 | 3        | F3:8551  | 17112021_RID_2349_DP3.raw |          |          | 8.9043E4 |
| total 3 peptides  |      |        |           |        |      |          |   |       |          |          |                           |          |          |          |

ETE69371.1  
[back to list](#)

| [Protein Coverage](#) | [Supporting Peptides](#) |  
Protein Coverage:

1 MCKITTALLA LLSLSFFLEL SSYHVRWSAM GSIFRRRKYT LPSQGDGPQP LFLTPYIESG KTEEGRQLSL VEHFPGPNVK

81 SYSGYLTVMN TYNSNLFFWF FPAQVGTGFS FTDDLKGYAK NEDDVGRDLY SAIVQFFQLF PDYQK**NDFYA TGESYAGKYV**

161 PAIGYYIHSN NPTAKIKINF KGVAIGDGLC DPEVMLGGYA EFLYQIGLVD EKQRLYVQNQ TNLGQQYIQQ KKWKEAFEVF

241 DILLNGDKTG SPYIQNVTGC SNYFNFLQCN EPEDQEYFGK LSLPNIRKS IHVGNLTFHD GSMVEEHLIE DIMKTIKPWL

321 AVLMDNYRVL LYNGQLDIIV AASLTERFLP TVPWGKAKEY KNAERIVWRI HDKDPEVAGY VR**QVGGEFYQV IVRGGGHILP**

401 **YDQPER**ALDM MDRFTMGKGW KQSRYGK

Supporting Peptides:

| Peptide           | Uniq | -10lgP | Mass      | Length | ppm  | m/z      | z | RT    | Fraction | Scan     | Source File               | Area F1  | Area F2  | Area F3  |
|-------------------|------|--------|-----------|--------|------|----------|---|-------|----------|----------|---------------------------|----------|----------|----------|
| K.NDFYATGESYAGK.Y | Y    | 72.10  | 1421.6099 | 13     | -0.1 | 711.8121 | 2 | 37.11 | 2        | F2:10004 | 12112021_RID_2349_DP2.raw | 1.9882E5 | 1.3335E5 |          |
| R.QVGGEFYQVIVR.G  | Y    | 42.38  | 1336.7139 | 11     | 0.4  | 669.3645 | 2 | 51.49 | 1        | F1:15706 | 12112021_RID_2349_DP1.raw | 1.4401E5 |          |          |
| R.GGGHILPYDQPER.A | Y    | 40.27  | 1437.7001 | 13     | 1.0  | 719.8580 | 2 | 31.99 | 3        | F3:8551  | 17112021_RID_2349_DP3.raw |          |          | 8.9043E4 |
| total 3 peptides  |      |        |           |        |      |          |   |       |          |          |                           |          |          |          |

XP\_026529384.1  
[back to list](#)

| [Protein Coverage](#) | [Supporting Peptides](#) |  
Protein Coverage:

|     |            |            |            |            |             |            |            |            |            |
|-----|------------|------------|------------|------------|-------------|------------|------------|------------|------------|
| 1   | MCKITTALLA | LLSLSFLEL  | SSYHVQWSAM | GSIFRRLKYT | LPSQGDGPQP  | LFLTPYIESG | KTEEGRQLSL | VEHFPGPNVK |            |
| 81  | SYSGYLTVM  | TYSNLFWF   | FPAQDQPEKA | PVLLWLQGGP | GGTSMFGLFV  | EHGPYVVQKN | LSLTERKFPW | TSKFMSLYID |            |
| 161 | NPVGTGFSFT | DDLKGYAKNE | DDVGRDLYSA | IVQFFQLFPD | YQKNDFYATG  | ESYAGK     | YVPA       | IGYYIHSNNP | TAKIKINFKG |
| 241 | VAIGDGLCDP | EVMLGGYAEF | LYQIGLVDEK | QRIYVQNQTN | LGQQYIQQKK  | WKEAFEVFDI | LLNGDKTGNP | YIQNVTGCSN |            |
| 321 | YFNFLQCNEP | EDQEYFGKLL | SLPNIRKSIH | VGNLTFHDGS | MVEEHLIEDI  | MKTIKPWLAV | LMDNYRVLLY | NGQLDIIVAA |            |
| 401 | SLTERFLPTV | PWSKAKEYKN | AERIVWRIHD | KDPEVAGYVH | QVGFEFYQVIV | RGGGHILPYD | QPER       | ALDMMMD    | RFIMGKGWKQ |
| 481 | SRYGK      |            |            |            |             |            |            |            |            |

Supporting Peptides:

| Peptide           | Uniq | -10lgP | Mass      | Length | ppm  | m/z      | z | RT    | Fraction | Scan     | Source File               | Area F1  | Area F2  | Area F3  |
|-------------------|------|--------|-----------|--------|------|----------|---|-------|----------|----------|---------------------------|----------|----------|----------|
| K.NDFYATGESYAGK.Y | Y    | 72.10  | 1421.6099 | 13     | -0.1 | 711.8121 | 2 | 37.11 | 2        | F2:10004 | 12112021_RID_2349_DP2.raw | 1.9882E5 | 1.3335E5 |          |
| H.QVGGEFYQVIVR.G  | Y    | 42.38  | 1336.7139 | 11     | 0.4  | 669.3645 | 2 | 51.49 | 1        | F1:15706 | 12112021_RID_2349_DP1.raw | 1.4401E5 |          |          |
| R.GGGHILPYDQPER.A | Y    | 40.27  | 1437.7001 | 13     | 1.0  | 719.8580 | 2 | 31.99 | 3        | F3:8551  | 17112021_RID_2349_DP3.raw |          |          | 8.9043E4 |
| total 3 peptides  |      |        |           |        |      |          |   |       |          |          |                           |          |          |          |

XP\_026563995.1  
[back to list](#)

[Protein Coverage](#) | [Supporting Peptides](#) |  
Protein Coverage:

|     |            |            |            |            |             |             |            |            |            |
|-----|------------|------------|------------|------------|-------------|-------------|------------|------------|------------|
| 1   | MCKITTTLLA | LLSLSFLEL  | SSYHVRWSAM | GSIFRRLKYT | LPSQGDGPQP  | LFLTPYIESG  | KTEEGRQLSL | VEHFPGPNVK |            |
| 81  | SYSDYLTVM  | TYSNLFWF   | FPAQDQPEKA | PVLLWLQGGP | GGTSMFGLFV  | EHGPYVVQKN  | LSLTERKFPW | TSKFMSLYID |            |
| 161 | NPVGTGFSFT | DELKGYAKNE | DDVGRDLYSA | IVQFFQLFPD | YQKNDFYATG  | ESYAGK      | YVPA       | VGYYIHSNNP | TAKIKINFKG |
| 241 | VAIGDGLCDP | EVMLGGYAEF | LYQIGLVDEK | QRIYVQNQTN | LGQQYIQQKK  | WKKA FEVFDI | LLNGDKTGNP | YIQNVTGCSN |            |
| 321 | YFNFLQCNEP | EDQEYFGKLL | SLPNIRKSIH | VGNLTFHDGS | IVEEHLIEDI  | MKTIKPWLAV  | LMDNYRVLLY | NGQLDIIVAA |            |
| 401 | SLTERFLPTV | PWSKAKEYKN | AERIVWRIHD | KDPDVAGYVR | QVGFEFYQVIV | RGGGHILPYD  | QPER       | ALDMMMD    | RFIMGKGWKQ |
| 481 | SRYGK      |            |            |            |             |             |            |            |            |

Supporting Peptides:

| Peptide           | Uniq | -10lgP | Mass      | Length | ppm  | m/z      | z | RT    | Fraction | Scan     | Source File               | Area F1  | Area F2  | Area F3  |
|-------------------|------|--------|-----------|--------|------|----------|---|-------|----------|----------|---------------------------|----------|----------|----------|
| K.NDFYATGESYAGK.Y | Y    | 72.10  | 1421.6099 | 13     | -0.1 | 711.8121 | 2 | 37.11 | 2        | F2:10004 | 12112021_RID_2349_DP2.raw | 1.9882E5 | 1.3335E5 |          |
| R.QVGFEFYQVIVR.G  | Y    | 42.38  | 1336.7139 | 11     | 0.4  | 669.3645 | 2 | 51.49 | 1        | F1:15706 | 12112021_RID_2349_DP1.raw | 1.4401E5 |          |          |
| R.GGGHILPYDQPER.A | Y    | 40.27  | 1437.7001 | 13     | 1.0  | 719.8580 | 2 | 31.99 | 3        | F3:8551  | 17112021_RID_2349_DP3.raw |          |          | 8.9043E4 |
| total 3 peptides  |      |        |           |        |      |          |   |       |          |          |                           |          |          |          |

P86497.1  
[back to list](#)

[Protein Coverage](#) | [Supporting Peptides](#) |  
Protein Coverage:

|    |            |            |            |            |            |            |            |            |  |
|----|------------|------------|------------|------------|------------|------------|------------|------------|--|
| 1  | VIGGAECDIN | EHPSLALIYS | TSMRFHCAGT | LLNQEWVSFT | MWDKDIMLIR | TLCAGVLEGG | KDTCIAHPCA | QPLLPAFYTK |  |
| 81 | VFDYIPWIK  |            |            |            |            |            |            |            |  |

Supporting Peptides:

| Peptide                           | Uniq | -10lgP | Mass      | Length | ppm | m/z  | z        | RT | Fraction | Scan | Source File | Area F1                   | Area F2 | Area F3 |
|-----------------------------------|------|--------|-----------|--------|-----|------|----------|----|----------|------|-------------|---------------------------|---------|---------|
| M.WDKDIMLIR.T                     | N    | 59.98  | 1188.6324 | 9      |     | 0.8  | 595.3240 | 2  | 47.61    | 2    | F2:13483    | 12112021_RID_2349_DP2.raw |         | 2.01051 |
| M.WDKDIM(+15.99)LIR.T             | N    | 54.14  | 1204.6274 | 9      |     | 0.6  | 603.3214 | 2  | 42.22    | 2    | F2:11819    | 12112021_RID_2349_DP2.raw |         | 1.42641 |
| V.SFTM(+15.99)WDKDIMLIR.T         | Y    | 52.39  | 1670.8160 | 13     |     | 0.4  | 836.4156 | 2  | 57.93    | 2    | F2:16952    | 12112021_RID_2349_DP2.raw |         | 1.01841 |
| F.TMWDKDIMLIR.T                   | N    | 50.40  | 1420.7207 | 11     |     | 0.6  | 711.3680 | 2  | 53.82    | 3    | F3:15851    | 17112021_RID_2349_DP3.raw |         |         |
| W.DKDIMLIR.T                      | N    | 44.22  | 1002.5532 | 8      |     | -0.5 | 502.2836 | 2  | 37.38    | 3    | F3:10341    | 17112021_RID_2349_DP3.raw |         |         |
| V.SFTM(+15.99)WDKDIM(+15.99)LIR.T | Y    | 42.80  | 1686.8109 | 13     |     | 0.4  | 844.4131 | 2  | 54.20    | 2    | F2:15770    | 12112021_RID_2349_DP2.raw |         | 4.40111 |
| W.DKDIM(+15.99)LIR.T              | N    | 39.37  | 1018.5481 | 8      |     | 0.3  | 510.2815 | 2  | 31.54    | 3    | F3:8358     | 17112021_RID_2349_DP3.raw |         |         |

JAG46182.1  
[back to list](#)

[Protein Coverage](#) | [Supporting Peptides](#) |

Protein Coverage:

|     |            |               |            |               |            |            |            |            |            |
|-----|------------|---------------|------------|---------------|------------|------------|------------|------------|------------|
| 1   | MYWHFPLLFA | ALISTYLCFP    | QNHL       | SLEELG        | SDIGIQVFNQ | LVKTRAGENV | VVSPHGIASV | LGMLQLGADS | KTKKQLTTVM |
| 81  | RYSVNGAGKV | LKKINKAIVS    | RKNKDIVK   | IA NVVFANSGLK | MEASFISRNS | EVFQCPVKNI | NFKDPNAASD | TMNQWVKNKT |            |
| 161 | EGMIDSVLTP | DDIDSALTRL    | VVINAVYFKG | LWRSRFQPEN    | TKKRTFNEGD | GKTYQVPMLA | QLSVFRCGTT | STPNDLWYNT |            |
| 241 | IELPYHGESI | SMLIALPAES    | STPLSAIIPH | ISTKTIQSWM    | TTMVQKRVQV | ILPKFTAEAE | TDLKEPLKEL | GIRDMFDQSR |            |
| 321 | ANFAKITR   | SE NIYVSQLLQK | AKIEVSEDGT | KASAATTAIV    | TARSSPPWFV | VDRPFLFFIR | HNPTGAVLFM | GQITKP     |            |

Supporting Peptides:

| Peptide            | Uniq -10lgP | Mass      | Length | ppm | m/z      | z | RT    | Fraction | Scan     | Source File               | Area F1  | Area F2 | Area F3 | Area F4 | Area F5 |
|--------------------|-------------|-----------|--------|-----|----------|---|-------|----------|----------|---------------------------|----------|---------|---------|---------|---------|
| K.IANVVFANSGLK.M Y | 77.60       | 1231.6924 | 12     | 0.3 | 616.8536 | 2 | 44.26 | 2        | F2:12431 | 12112021_RID_2349_DP2.raw | 7.2043E4 |         |         |         |         |
| R.SENIYVSQLLQK.A Y | 41.15       | 1420.7561 | 12     | 0.3 | 711.3856 | 2 | 49.58 | 2        | F2:14262 | 12112021_RID_2349_DP2.raw | 4.7741E4 |         |         |         |         |
| total 2 peptides   |             |           |        |     |          |   |       |          |          |                           |          |         |         |         |         |

XP\_015674504.1  
[back to list](#)

[Protein Coverage](#) | [Supporting Peptides](#) |

Protein Coverage:

|     |            |               |            |               |            |            |            |            |            |
|-----|------------|---------------|------------|---------------|------------|------------|------------|------------|------------|
| 1   | MYWHFPLLFA | ALISTYACFP    | QNHL       | SLEELG        | SDIGIQVFNQ | LVKTRAGDNV | VVSPHGIASV | LGMLQLGADS | KTKKQLTTVM |
| 81  | RYSVNGAGKV | LKKINKAIVS    | RKNKDIVK   | IA NVVFANSGLK | MEAPFISRNS | EVFQCPVKNI | NFKDPNAASD | TMNQWVKNKT |            |
| 161 | EGMIDSVLTP | GDIDSALTRL    | VVINAVYFKG | LWRSRFQPEN    | TKKRTFNEGD | GKTYQVPMLA | QLSVFRCGTT | STPNDLWYNT |            |
| 241 | IELPYHGESI | SMLIALPAES    | STPLSAIIPH | ISTKTIQSWM    | TTMVQKRVQV | ILPKFTAEAE | TDLKEPLKEL | GIRDMFDQSR |            |
| 321 | ANFAKITR   | SE NIYVSQLLQK | AKIEVSEDGT | KASAATTAIV    | TARSSPPWFV | VDRPFLFFIR | HNPTGAVLFM | GQITKP     |            |

Supporting Peptides:

| Peptide            | Uniq -10lgP | Mass      | Length | ppm | m/z      | z | RT    | Fraction | Scan     | Source File               | Area F1  | Area F2 | Area F3 | Area F4 | Area F5 |
|--------------------|-------------|-----------|--------|-----|----------|---|-------|----------|----------|---------------------------|----------|---------|---------|---------|---------|
| K.IANVVFANSGLK.M Y | 77.60       | 1231.6924 | 12     | 0.3 | 616.8536 | 2 | 44.26 | 2        | F2:12431 | 12112021_RID_2349_DP2.raw | 7.2043E4 |         |         |         |         |
| R.SENIYVSQLLQK.A Y | 41.15       | 1420.7561 | 12     | 0.3 | 711.3856 | 2 | 49.58 | 2        | F2:14262 | 12112021_RID_2349_DP2.raw | 4.7741E4 |         |         |         |         |
| total 2 peptides   |             |           |        |     |          |   |       |          |          |                           |          |         |         |         |         |

JAG43702.1  
[back to list](#)

[Protein Coverage](#) | [Supporting Peptides](#) |

Protein Coverage:

|     |            |               |            |               |            |            |            |            |            |
|-----|------------|---------------|------------|---------------|------------|------------|------------|------------|------------|
| 1   | MYWHFPLLFA | ALISTYLCFP    | QNHL       | SLEELG        | SDIGIQVFNQ | LVKTRAGENV | VVSPHGIASV | LGMLQLGADS | KTKKQLTTVM |
| 81  | RYSVNGAGKV | LKKINKAIVS    | RKNKDIVK   | IA NVVFANSGLK | MEASFISRNS | EVFQCPVKNI | NFKDPNAASD | TMNQWVKNKT |            |
| 161 | EGMIDSVLTP | DDIDSALTRL    | VVINAVYFKG | LWRSRFQPEN    | TKKRTFNEGD | GKTYQVPMLA | QLSVFRCGTT | STPNDLWYNT |            |
| 241 | IELPYHGESI | SMLIALPAES    | STPLSAIIPH | ISTKTIQSWM    | TTMVQKRVQV | ILPKFTAEAE | TDLKEPLKEL | GIRDMFDQSR |            |
| 321 | ANFAKITR   | SE NIYVSQLLQK | AKIEVSEDGT | KASAATTAIV    | TARSSPPWFV | VDRPFLFFIR | HNPTGAVLFM | GQITKP     |            |

Supporting Peptides:

| Peptide            | Uniq -10lgP | Mass      | Length | ppm | m/z      | z | RT    | Fraction | Scan     | Source File               | Area F1  | Area F2 | Area F3 | Area F4 | Area F5 |
|--------------------|-------------|-----------|--------|-----|----------|---|-------|----------|----------|---------------------------|----------|---------|---------|---------|---------|
| K.IANVVFANSGLK.M Y | 77.60       | 1231.6924 | 12     | 0.3 | 616.8536 | 2 | 44.26 | 2        | F2:12431 | 12112021_RID_2349_DP2.raw | 7.2043E4 |         |         |         |         |
| R.SENIYVSQLLQK.A Y | 41.15       | 1420.7561 | 12     | 0.3 | 711.3856 | 2 | 49.58 | 2        | F2:14262 | 12112021_RID_2349_DP2.raw | 4.7741E4 |         |         |         |         |
| total 2 peptides   |             |           |        |     |          |   |       |          |          |                           |          |         |         |         |         |

JAA96331.1  
[back to list](#)

[Protein Coverage](#) | [Supporting Peptides](#) |

Protein Coverage:

|     |            |               |            |               |            |            |            |            |            |
|-----|------------|---------------|------------|---------------|------------|------------|------------|------------|------------|
| 1   | MYWHFPLLFA | ALISTYLCFP    | QNHL       | SLEELG        | SDIGIQVFNQ | LVKTRAGENV | VVSPHGIASV | LGMLQLGADS | KTKKQLTTVM |
| 81  | RYSVNGAGKV | LKKINKAIVS    | RKNKDIVK   | IA NVVFANSGLK | MEASFISRNS | EVFQCPVKNI | NFKDPNAASD | TMNQWVKNKT |            |
| 161 | EGMIDSVLTP | DDIDSALTRL    | VVINAVYFKG | LWRSRFQPEN    | TKKRTFNEGD | GKTYQVPMLA | QLSVFRCGTT | STPNDLWYNT |            |
| 241 | IELPYHGESI | SMLIALPAES    | STPLSAIIPH | ISTKTIQSWM    | TTMVQKRVQV | ILPKFTAEAE | TDLKEPLKEL | GIRDMFDQSR |            |
| 321 | ANFAKITR   | SE NIYVSQLLQK | AKIEVSEDGT | KASAATTAIV    | TARSSPPWFV | VDRPFLFFIR | HNPTGAVLFM | GQITKP     |            |

Supporting Peptides:

| Peptide | Uniq -10lgP | Mass | Length | ppm | m/z | z | RT | Fraction | Scan | Source File | Area F1 | Area F2 | Area F3 | Area F4 | Area F5 |
|---------|-------------|------|--------|-----|-----|---|----|----------|------|-------------|---------|---------|---------|---------|---------|
|---------|-------------|------|--------|-----|-----|---|----|----------|------|-------------|---------|---------|---------|---------|---------|

| Peptide            | Uniq -10lgP | Mass      | Length | ppm | m/z      | z | RT    | Fraction | Scan     | Source File               | Area F1 | Area F2  | Area F3 | Area F4 | Area F5 |
|--------------------|-------------|-----------|--------|-----|----------|---|-------|----------|----------|---------------------------|---------|----------|---------|---------|---------|
| K.IANVVFANGLK.M Y  | 77.60       | 1231.6924 | 12     | 0.3 | 616.8536 | 2 | 44.26 | 2        | F2:12431 | 12112021_RID_2349_DP2.raw |         | 7.2043E4 |         |         |         |
| R.SENIYVSQLLQK.A Y | 41.15       | 1420.7561 | 12     | 0.3 | 711.3856 | 2 | 49.58 | 2        | F2:14262 | 12112021_RID_2349_DP2.raw |         | 4.7741E4 |         |         |         |
| total 2 peptides   |             |           |        |     |          |   |       |          |          |                           |         |          |         |         |         |

XP\_015674505.1  
[back to list](#)

[Protein Coverage](#) | [Supporting Peptides](#) |  
Protein Coverage:

|     |            |            |            |            |            |            |            |            |            |
|-----|------------|------------|------------|------------|------------|------------|------------|------------|------------|
| 1   | MYWHFPLLFA | ALISTYACFP | QNHL       | SLEELG     | SDIGIQVFNQ | LVKTRAGDNV | VVSPHGIASV | LGMLQLGADS | KTKKQLTTVM |
| 81  | RYSVNGAGKV | LKKINKAIVS | RKNKDIVK   | IA         | NVVFANGLK  | MEAPFISRNS | EVFQCPVKNI | NFKDPNAASD | TMNQWVKNT  |
| 161 | EGMIDSVLTP | GDIDSALTRL | VVINAVYFKG | LWRSRFQPEN | TKKRTFNEGD | GKTYQVPMLA | QLSVFRCGTT | STPNDLWYNT |            |
| 241 | IELPYHGESI | SMLIALPAES | STPLSAIIPH | ISTKTIQSWM | TTMVQKRVQV | ILPKFTAEEA | TDLKEPLKEL | GIRDMFDQSR |            |
| 321 | ANFAKITR   | SE         | NIYVSQLLQK | AKIEVSEDGT | KASAATTAIV | TARSSPPWFV | VDRPFLFFIR | HNPTGAVLFM | GQITKP     |

Supporting Peptides:

| Peptide            | Uniq -10lgP | Mass      | Length | ppm | m/z      | z | RT    | Fraction | Scan     | Source File               | Area F1 | Area F2  | Area F3 | Area F4 | Area F5 |
|--------------------|-------------|-----------|--------|-----|----------|---|-------|----------|----------|---------------------------|---------|----------|---------|---------|---------|
| K.IANVVFANGLK.M Y  | 77.60       | 1231.6924 | 12     | 0.3 | 616.8536 | 2 | 44.26 | 2        | F2:12431 | 12112021_RID_2349_DP2.raw |         | 7.2043E4 |         |         |         |
| R.SENIYVSQLLQK.A Y | 41.15       | 1420.7561 | 12     | 0.3 | 711.3856 | 2 | 49.58 | 2        | F2:14262 | 12112021_RID_2349_DP2.raw |         | 4.7741E4 |         |         |         |
| total 2 peptides   |             |           |        |     |          |   |       |          |          |                           |         |          |         |         |         |

JAV49839.1  
[back to list](#)

[Protein Coverage](#) | [Supporting Peptides](#) |  
Protein Coverage:

|     |            |            |            |            |            |            |            |            |            |
|-----|------------|------------|------------|------------|------------|------------|------------|------------|------------|
| 1   | MYWHFPLLFA | ALISTYFCFP | QNHL       | SLEELG     | SDIGIQVFNQ | LVKTRAGDNV | VVSPHGIASV | LGMLQLGADS | KTKKQLTTVM |
| 81  | RYSVNGAGKV | LKKINKAIVS | RKNKDIVK   | IA         | NVVFANGLK  | MEAPFISRNS | EVFQCPVKNI | NFKDPNAASD | TMNQWVKNT  |
| 161 | EGMIDSVLTP | DDIDSALTRL | VVINAVYFKG | LWRSRFQPEN | TKKRTFNEGD | GKTYQVPMLA | QLSVFRCGTT | STPNDLWYNT |            |
| 241 | IELPYHGESI | SMLIALPAES | STPLSAIIPH | ISTKTIQSWM | TTMVQKRVQV | ILPKFTAEEA | TDLKEPLKEL | GIRDMFDQSR |            |
| 321 | ANFAKITR   | SE         | NIYVSQLLQK | AKIEVSEDGT | KASAATTAIV | TARSSPPWFV | VDRPFLFFIR | HNPTGAVLFM | GQITKP     |

Supporting Peptides:

| Peptide            | Uniq -10lgP | Mass      | Length | ppm | m/z      | z | RT    | Fraction | Scan     | Source File               | Area F1 | Area F2  | Area F3 | Area F4 | Area F5 |
|--------------------|-------------|-----------|--------|-----|----------|---|-------|----------|----------|---------------------------|---------|----------|---------|---------|---------|
| K.IANVVFANGLK.M Y  | 77.60       | 1231.6924 | 12     | 0.3 | 616.8536 | 2 | 44.26 | 2        | F2:12431 | 12112021_RID_2349_DP2.raw |         | 7.2043E4 |         |         |         |
| R.SENIYVSQLLQK.A Y | 41.15       | 1420.7561 | 12     | 0.3 | 711.3856 | 2 | 49.58 | 2        | F2:14262 | 12112021_RID_2349_DP2.raw |         | 4.7741E4 |         |         |         |
| total 2 peptides   |             |           |        |     |          |   |       |          |          |                           |         |          |         |         |         |

TRINITY\_DN3815  
[back to list](#)

[Protein Coverage](#) | [Supporting Peptides](#) |  
Protein Coverage:

|     |            |            |            |            |            |            |            |            |            |
|-----|------------|------------|------------|------------|------------|------------|------------|------------|------------|
| 1   | MYWHFPLLFA | ALISTYVCFP | QNHL       | SLEELG     | SDIGIQVFNQ | LVKTRADDNV | VVSPHGIASV | LGMLQLGADS | KTKKQLTTVM |
| 81  | RYSVNGAGKV | LKKINKAIVS | RKNKDIVK   | IA         | NVVFANGLK  | MEAPFISRNS | EVFQCPVKNI | NFKDPNAASD | TMNQWVKNT  |
| 161 | QGMIDSVLTP | DDIDSALTRL | VVINAVYFKG | LWRSRFQPEN | TKKRTFNGGD | GKTYQVPMLA | QLSVFRCGTT | STPNDLWYNT |            |
| 241 | IELPYHGESI | SMLIALPAQI | STPLSAIIPH | ISTKTIQSWM | TTMVQKRVQV | ILPKFTAEEA | TDLKEPLKEL | GIRDMFDQSR |            |
| 321 | ANFAKITR   | SE         | NIYVSQLLQK | AKIEVSEDGT | KASAATTAIV | TARSSPPWFV | VDRPFLFFIR | HNPTGAVLFM | GQITKP     |

Supporting Peptides:

| Peptide            | Uniq -10lgP | Mass      | Length | ppm | m/z      | z | RT    | Fraction | Scan     | Source File               | Area F1 | Area F2  | Area F3 | Area F4 | Area F5 |
|--------------------|-------------|-----------|--------|-----|----------|---|-------|----------|----------|---------------------------|---------|----------|---------|---------|---------|
| K.IANVVFANGLK.M Y  | 77.60       | 1231.6924 | 12     | 0.3 | 616.8536 | 2 | 44.26 | 2        | F2:12431 | 12112021_RID_2349_DP2.raw |         | 7.2043E4 |         |         |         |
| R.SENIYVSQLLQK.A Y | 41.15       | 1420.7561 | 12     | 0.3 | 711.3856 | 2 | 49.58 | 2        | F2:14262 | 12112021_RID_2349_DP2.raw |         | 4.7741E4 |         |         |         |
| total 2 peptides   |             |           |        |     |          |   |       |          |          |                           |         |          |         |         |         |

TRINITY\_DN3815  
[back to list](#)

[Protein Coverage](#) | [Supporting Peptides](#) |  
Protein Coverage:

|     |            |            |            |            |            |            |            |            |            |
|-----|------------|------------|------------|------------|------------|------------|------------|------------|------------|
| 1   | MYWHFPLLFA | ALISTYVCFP | QNHL       | SLEELG     | SDIGIQVFNQ | LVKTRADDNV | VVSPHGIASV | LGMLQLGADS | KTKKQLTTVM |
| 81  | RYSVNGAGKV | LKKINKAIVS | RKNKDIVK   | IA         | NVVFANSGLK | MEAPFISRNS | EVFQCPVKNI | NFKDPNAASD | TMNQWVKNKT |
| 161 | QGMIDSVLTP | DDIDSALTRL | VVINAVYFKG | LWRSRFQPEN | TKKRTFNGGD | GKTYQVPMLA | QLSVFRCGTT | STPNDLWYNT |            |
| 241 | IELPYHGESI | SMLIALPAQI | STPLSAIIPH | ISTKTIQSWM | TTMVQKRQVQ | ILPKFTAEEA | TDLKEPLKEL | GIRDMFDQSR |            |
| 321 | ANFAKITR   | SE         | NIYVSQLLQK | AKIEVSEDGT | KASAATTAIV | TARSSPPWFV | VDRPFLFFIR | HNPTGAVLFM | GQITKP     |

Supporting Peptides:

| Peptide          | Uniq | -10lgP | Mass      | Length | ppm | m/z      | z | RT    | Fraction | Scan     | Source File               | Area F1  | Area F2 | Area F3 | Area F4 | Area F5 |
|------------------|------|--------|-----------|--------|-----|----------|---|-------|----------|----------|---------------------------|----------|---------|---------|---------|---------|
| K.IANVVFANSGLK.M | Y    | 77.60  | 1231.6924 | 12     | 0.3 | 616.8536 | 2 | 44.26 | 2        | F2:12431 | 12112021_RID_2349_DP2.raw | 7.2043E4 |         |         |         |         |
| R.SENIYVSQLLQK.A | Y    | 41.15  | 1420.7561 | 12     | 0.3 | 711.3856 | 2 | 49.58 | 2        | F2:14262 | 12112021_RID_2349_DP2.raw | 4.7741E4 |         |         |         |         |
| total 2 peptides |      |        |           |        |     |          |   |       |          |          |                           |          |         |         |         |         |

TRINITY\_DN3815

[back to list](#)

| [Protein Coverage](#) | [Supporting Peptides](#) |

Protein Coverage:

|     |            |            |            |            |            |            |            |            |            |
|-----|------------|------------|------------|------------|------------|------------|------------|------------|------------|
| 1   | MYWHFPLLFA | ALISTYVCFP | QNHL       | SLEELG     | SDIGIQVFNQ | LVKTRADDNV | VVSPHGIASV | LGMLQLGADS | KTKKQLTTVM |
| 81  | RYSVNGAGKV | LKKINKAIVS | RKNKDIVK   | IA         | NVVFANSGLK | MEAPFISRNS | EVFQCPVKNI | NFKDPNAASD | TMNQWVKNKT |
| 161 | QGMIDSVLTP | DDIDSALTRL | VVINAVYFKG | LWRSRFQPEN | TKKRTFNGGD | GKTYQVPMLA | QLSVFRCGTT | STPNDLWYNT |            |
| 241 | IELPYHGESI | SMLIALPAQI | STPLSAIIPH | ISTKTIQSWM | TTMVQKRQVQ | ILPKFTAEEA | TDLKEPLKEL | GIRDMFDQSR |            |
| 321 | ANFAKITR   | SE         | NIYVSQLLQK | AKIEVSEDGT | KASAATTAIV | TARSSPPWFV | VDRPFLFFIR | HNPTGAVLFM | GQITKP     |

Supporting Peptides:

| Peptide          | Uniq | -10lgP | Mass      | Length | ppm | m/z      | z | RT    | Fraction | Scan     | Source File               | Area F1  | Area F2 | Area F3 | Area F4 | Area F5 |
|------------------|------|--------|-----------|--------|-----|----------|---|-------|----------|----------|---------------------------|----------|---------|---------|---------|---------|
| K.IANVVFANSGLK.M | Y    | 77.60  | 1231.6924 | 12     | 0.3 | 616.8536 | 2 | 44.26 | 2        | F2:12431 | 12112021_RID_2349_DP2.raw | 7.2043E4 |         |         |         |         |
| R.SENIYVSQLLQK.A | Y    | 41.15  | 1420.7561 | 12     | 0.3 | 711.3856 | 2 | 49.58 | 2        | F2:14262 | 12112021_RID_2349_DP2.raw | 4.7741E4 |         |         |         |         |
| total 2 peptides |      |        |           |        |     |          |   |       |          |          |                           |          |         |         |         |         |

TRINITY\_DN3815

[back to list](#)

| [Protein Coverage](#) | [Supporting Peptides](#) |

Protein Coverage:

|     |            |            |            |            |            |            |            |            |            |
|-----|------------|------------|------------|------------|------------|------------|------------|------------|------------|
| 1   | MYWHFPLLFA | ALISTYVCFP | QNHL       | SLEELG     | SDIGIQVFNQ | LVKTRADDNV | VVSPHGIASV | LGMLQLGADS | KTKKQLTTVM |
| 81  | RYSVNGAGKV | LKKINKAIVS | RKNKDIVK   | IA         | NVVFANSGLK | MEAPFISRNS | EVFQCPVKNI | NFKDPNAASD | TMNQWVKNKT |
| 161 | QGMIDSVLTP | DDIDSALTRL | VVINAVYFKG | LWRSRFQPEN | TKKRTFNGGD | GKTYQVPMLA | QLSVFRCGTT | STPNDLWYNT |            |
| 241 | IELPYHGESI | SMLIALPAQI | STPLSAIIPH | ISTKTIQSWM | TTMVQKRQVQ | ILPKFTAEEA | TDLKEPLKEL | GIRDMFDQSR |            |
| 321 | ANFAKITR   | SE         | NIYVSQLLQK | AKIEVSEDGT | KASAATTAIV | TARSSPPWFV | VDRPFLFFIR | HNPTGAVLFM | GQITKP     |

Supporting Peptides:

| Peptide          | Uniq | -10lgP | Mass      | Length | ppm | m/z      | z | RT    | Fraction | Scan     | Source File               | Area F1  | Area F2 | Area F3 | Area F4 | Area F5 |
|------------------|------|--------|-----------|--------|-----|----------|---|-------|----------|----------|---------------------------|----------|---------|---------|---------|---------|
| K.IANVVFANSGLK.M | Y    | 77.60  | 1231.6924 | 12     | 0.3 | 616.8536 | 2 | 44.26 | 2        | F2:12431 | 12112021_RID_2349_DP2.raw | 7.2043E4 |         |         |         |         |
| R.SENIYVSQLLQK.A | Y    | 41.15  | 1420.7561 | 12     | 0.3 | 711.3856 | 2 | 49.58 | 2        | F2:14262 | 12112021_RID_2349_DP2.raw | 4.7741E4 |         |         |         |         |
| total 2 peptides |      |        |           |        |     |          |   |       |          |          |                           |          |         |         |         |         |

TRINITY\_DN3815

[back to list](#)

| [Protein Coverage](#) | [Supporting Peptides](#) |

Protein Coverage:

|     |            |            |            |            |            |            |            |            |            |
|-----|------------|------------|------------|------------|------------|------------|------------|------------|------------|
| 1   | MYWHFPLLFA | ALISTYVCFP | QNHL       | SLEELG     | SDIGIQVFNQ | LVKTRADDNV | VVSPHGIASV | LGMLQLGADS | KTKKQLTTVM |
| 81  | RYSVNGAGKV | LKKINKAIVS | RKNKDIVK   | IA         | NVVFANSGLK | MEAPFISRNS | EVFQCPVKNI | NFKDPNAASD | TMNQWVKNKT |
| 161 | QGMIDSVLTP | DDIDSALTRL | VVINAVYFKG | LWRSRFQPEN | TKKRTFNGGD | GKTYQVPMLA | QLSVFRCGTT | STPNDLWYNT |            |
| 241 | IELPYHGESI | SMLIALPAQI | STPLSAIIPH | ISTKTIQSWM | TTMVQKRQVQ | ILPKFTAEEA | TDLKEPLKEL | GIRDMFDQSR |            |
| 321 | ANFAKITR   | SE         | NIYVSQLLQK | AKIEVSEDGT | KASAATTAIV | TARSSPPWFV | VDRPFLFFIR | HNPTGAVLFM | GQITKP     |

Supporting Peptides:

| Peptide          | Uniq | -10lgP | Mass      | Length | ppm | m/z      | z | RT    | Fraction | Scan     | Source File               | Area F1  | Area F2 | Area F3 | Area F4 | Area F5 |
|------------------|------|--------|-----------|--------|-----|----------|---|-------|----------|----------|---------------------------|----------|---------|---------|---------|---------|
| K.IANVVFANSGLK.M | Y    | 77.60  | 1231.6924 | 12     | 0.3 | 616.8536 | 2 | 44.26 | 2        | F2:12431 | 12112021_RID_2349_DP2.raw | 7.2043E4 |         |         |         |         |
| total 2 peptides |      |        |           |        |     |          |   |       |          |          |                           |          |         |         |         |         |

| Peptide          | Uniq -10lgP | Mass  | Length    | ppm | m/z | z        | RT | Fraction | Scan | Source File                        | Area F1 | Area F2  | Area F3          | Area F4 | Area F5 |
|------------------|-------------|-------|-----------|-----|-----|----------|----|----------|------|------------------------------------|---------|----------|------------------|---------|---------|
| R.SENIYVSQLLQK.A | Y           | 41.15 | 1420.7561 | 12  | 0.3 | 711.3856 | 2  | 49.58    | 2    | F2:14262 12112021_RID_2349_DP2.raw |         | 4.7741E4 |                  |         |         |
|                  |             |       |           |     |     |          |    |          |      |                                    |         |          | total 2 peptides |         |         |

TRINITY\_DN28984  
[back to list](#)

| [Protein Coverage](#) | [Supporting Peptides](#) |  
Protein Coverage:

|      |             |                |            |                |            |            |            |                |                       |
|------|-------------|----------------|------------|----------------|------------|------------|------------|----------------|-----------------------|
| 1    | ETKPRELYGR  | RLPLREYLV      | VPVVVPTETS | RKICVQLNHL     | NESVTLSITL | EYGLQNRSL  | REEVSKKDLF | QCTEFQIPKW     |                       |
| 81   | ERSFNHIAL   | FTVEVTGATL     | RYLDRKRVYI | ENQESLTFVQ     | TDKPIYKPGH | KVLFRAVSLT | KEFIPVTEKV | PLIYIEDPKR     |                       |
| 161  | NRLFHWKDVE  | LKGGLVQLEF     | PLSSEPALGT | YKVVVQKDSG     | RKVEHPYTV  | EYELPKFEVT | VKSTPVITIL | DNKLDVTVC      |                       |
| 241  | KYTFGKPVPG  | LVNIRVCRKF     | SFFGSTCYGE | ESKAICEEFH     | GKADIHGCF  | QEVDLKIFQL | KRNGFQM    | QIQ TEGTITEEGT |                       |
| 321  | EIVLTGSGTT  | QITSTLSVVS     | FENVDAAYKP | GLPLSGEIKL     | VDGRTKPIAN | QVVELQVSGV | KNSTYHNTDD | QGRARFSIDT     |                       |
| 401  | SDFTNDAVQL  | TATYKQLDYC     | YDSNWISPOH | QTAFTSLSRF     | YSPSQSYLKI | ERHLGSLTCG | EHAVIPVHYI | LKPELIKDK      |                       |
| 481  | VVFYYLVVAR  | GDIVKTGTHP     | LKGKESKGT  | FLNLLVDIKS     | APLARVLLYT | ILDNGELVH  | SADFPVEPCF | ANKVNLRF       |                       |
| 561  | PEGLPGSSIN  | LQLSAAQNSL     | CAIHAVDQSV | FLPKPEAELS     | PRTVYDLLPV | KDLRGYYYS  | ENLEDPD    | TNP CVPPRKII   |                       |
| 641  | GIRYQTD     | TYS YGEGDAYTIL | KDIGFKTFTS | TQIHKPNICS     | SPDVYYSR   | AY         | AEELKRES   | AE AVETTIR     | SFF                   |
| 721  | PETWLWSIKS  | LSSETEVTLP     | VTIPDTITEW | RAGAFCLSPV     | VGFGLAKTTF | LKAMQPPFVE | VTQPYSVVRG | EAENLK         | ATVF                  |
| 801  | SYQKR       | RPIQVS         | LSLLLSPDYD | ASPVEKEQDS     | YCLPVDGRKT | VSWKVTPKTL | GKVNFTITAE | ALKSAQLCGN     | EIVEVPTKGQ            |
| 881  | RDIVIKSLLV  | EPGIEKEVV      | INNLLCGDKG | TPSATISLKV     | PEKVVEKSAR | AFFSVLGDIL | SSAIQNVHQL | IRLPTGC        | GGEQ                  |
| 961  | NMALLAPNIY  | ILDYLNATGQ     | LNEDMKS    | KAI GFLVAGYQRQ | LNKXHADGSY | STFGERNNEP | GNVWLTAFVL | KCLSQMKRYI     |                       |
| 1041 | PVEERHLIDA  | QHFLALKQKP     | NGCFQITGTL | LNNALKGGVD     | DEVTLSTYIA | IALLEMSLPV | THSVLRNALF | CLETASQQKD     |                       |
| 1121 | IPVYNLALLG  | YAFALAHKQD     | KVAEILHTLQ | GKAVKGEDGS     | IHWERPAKPE | AKKPLYYESR | ASSAEVELNS | YMLLTYLKR      | N                     |
| 1201 | PSPTQDDLAM  | ASKI           | VTWLTK     | QQNP           | SGGFSS     | TQDTVVALQA | LSLYAAATFS | NSAEGIRVTL     | KSGENNLKEF QVDNSNRILL |
| 1281 | QTQDLPTVPG  | EYSAVVTGKG     | CTYVQTTLRY | NVLPHPEDDP     | FAVTVDTIPE | TCVGVKAHKE | FEIVMNVSYT | GKRPASNMAI     |                       |
| 1361 | INVKMGVSGFV | PNAPSLKKLK     | KQAPIQQVEV | TATNVMLYLE     | KVTNVTIPIS | FTVERSFDIQ | NQRPAFVHMY | DYIEDESTV      |                       |
| 1441 | PYSAPCSKAK  | FGNA           |            |                |            |            |            |                |                       |

Supporting Peptides:

| Peptide            | Uniq -10lgP | Mass  | Length    | ppm | m/z  | z        | RT | Fraction | Scan | Source File                       | Area F1 | Area F2 | Area F3 | Area F4 | Area F5 |
|--------------------|-------------|-------|-----------|-----|------|----------|----|----------|------|-----------------------------------|---------|---------|---------|---------|---------|
| R.NPSPTQDDLAMASK.I | Y           | 58.60 | 1473.6769 | 14  | 1.1  | 737.8466 | 2  | 32.86    | 7    | F7:8878 17112021_RID_2349_DP7.raw |         |         |         |         |         |
| S.AEAVETTIR.S      | Y           | 52.94 | 988.5189  | 9   | -0.1 | 495.2667 | 2  | 26.18    | 7    | F7:6550 17112021_RID_2349_DP7.raw |         |         |         |         |         |
| K.ATVFSYQK.R       | Y           | 50.25 | 942.4811  | 8   | -0.2 | 472.2477 | 2  | 31.69    | 7    | F7:8446 17112021_RID_2349_DP7.raw |         |         |         |         |         |

total 3 peptides

TRINITY\_DN28984  
[back to list](#)

| [Protein Coverage](#) | [Supporting Peptides](#) |  
Protein Coverage:

Supporting Peptides:

**total 3 peptides**

[back to list](#)

[Protein Coverage](#) | [Supporting Peptides](#)

Protein Coverage:

### Supporting Peptides:

**total 2 peptides**

[back to list](#)

[Protein Coverage](#) | [Supporting Peptides](#)

Protein Coverage:

### Supporting Peptides:

**total 2 peptides**

[back to list](#)

[Protein Coverage](#) | [Supporting Peptides](#) |

Protein Coverage:

1MAEEKPQVEL FVKAGSDGAK IGNCPPFSQRL FMVLWLK**GVT FNVTTVDTKR** RTEAVQKLCP GGQLPFLMYG TEVHTDTNKKV

81EEFLEEVLCP PKYPK**LAANN PESNTAGLDV FAK**FSAYIKN SNPSLNANLE KGLLKALKVL DVYLMTPQPE EVDENSAEDE

161GQSNRKFLDG NELTLADCNL LPKLHIVKVV CKKYRDFTIP EEFRGIHRYL KNAYAREEFS STCPDDEEIE LAYELVAKAL

241K

Supporting Peptides:

| Peptide                  | Uniq  | -10lgP    | Mass      | Length | ppm      | m/z      | z     | RT    | Fraction | Scan     | Source File               | Area F1 | Area F2 | Area F3 | Are  |
|--------------------------|-------|-----------|-----------|--------|----------|----------|-------|-------|----------|----------|---------------------------|---------|---------|---------|------|
| K.LAANNPESNTAGLDVFAK.F Y | 72.78 | 1830.9111 | 18        | 1.0    | 916.4637 | 2        | 47.50 | 4     |          | F4:13719 | 17112021_RID_2349_DP4.raw |         |         |         | 4.70 |
| K.GVTFNVTTVDTK.R         | Y     | 48.38     | 1280.6613 | 12     | 1.0      | 641.3386 | 2     | 41.97 | 4        | F4:11922 | 17112021_RID_2349_DP4.raw |         |         |         | 6.49 |
| total 2 peptides         |       |           |           |        |          |          |       |       |          |          |                           |         |         |         |      |

XP\_026541233.1

[back to list](#)

[Protein Coverage](#) | [Supporting Peptides](#) |

Protein Coverage:

1MAEEKPQVEL FVKAGSDGAK IGNCPPFSQRL FMVLWLK**GVT FNVTTVDTKR** RTEAVQKLCP GGQLPFLMYG TEVHTDTNKKV

81EEFLEEVLCP PKYPK**LAANN PESNTAGLDV FAK**FSAYIKN SNPSLNANLE KGLLKALKVL DVYLMTPQPE EVDENSAEDE

161GQSNRKFLDG NELTLADCNL LPKLHIVKVV CKKYRDFTIP EEFRGIHRYL KNAYAREEFS STCPDDEEIE LAYELVAKAL

241KA

Supporting Peptides:

| Peptide                  | Uniq  | -10lgP    | Mass      | Length | ppm      | m/z      | z     | RT    | Fraction | Scan     | Source File               | Area F1 | Area F2 | Area F3 | Are  |
|--------------------------|-------|-----------|-----------|--------|----------|----------|-------|-------|----------|----------|---------------------------|---------|---------|---------|------|
| K.LAANNPESNTAGLDVFAK.F Y | 72.78 | 1830.9111 | 18        | 1.0    | 916.4637 | 2        | 47.50 | 4     |          | F4:13719 | 17112021_RID_2349_DP4.raw |         |         |         | 4.70 |
| K.GVTFNVTTVDTK.R         | Y     | 48.38     | 1280.6613 | 12     | 1.0      | 641.3386 | 2     | 41.97 | 4        | F4:11922 | 17112021_RID_2349_DP4.raw |         |         |         | 6.49 |
| total 2 peptides         |       |           |           |        |          |          |       |       |          |          |                           |         |         |         |      |

XP\_026576189.1

[back to list](#)

[Protein Coverage](#) | [Supporting Peptides](#) |

Protein Coverage:

1MAEEKPQVEL FVKAGSDGAK IGNCPPFSQRL FMVLWLK**GVT FNVTTVDTKR** RTEAVQKLCP GGQLPFLMYG TEVHTDTNKKI

81EEFLEEVLCP PKYPK**LAANN PESNTAGLDV FAK**FSAYIKN SNPSLNANLE KGLLKALKVL DVYLMTPQPE EVDENSAEDE

161GQSNRKFLDG NELTLADCNL LPKLHIVKVV CKKYRDFTIP EEFRGIHRYL KNAYAREEFS STCPDDEEIE LAYELVAKAL

241KA

Supporting Peptides:

| Peptide                  | Uniq  | -10lgP    | Mass      | Length | ppm      | m/z      | z     | RT    | Fraction | Scan     | Source File               | Area F1 | Area F2 | Area F3 | Are  |
|--------------------------|-------|-----------|-----------|--------|----------|----------|-------|-------|----------|----------|---------------------------|---------|---------|---------|------|
| K.LAANNPESNTAGLDVFAK.F Y | 72.78 | 1830.9111 | 18        | 1.0    | 916.4637 | 2        | 47.50 | 4     |          | F4:13719 | 17112021_RID_2349_DP4.raw |         |         |         | 4.70 |
| K.GVTFNVTTVDTK.R         | Y     | 48.38     | 1280.6613 | 12     | 1.0      | 641.3386 | 2     | 41.97 | 4        | F4:11922 | 17112021_RID_2349_DP4.raw |         |         |         | 6.49 |
| total 2 peptides         |       |           |           |        |          |          |       |       |          |          |                           |         |         |         |      |

LAB45561.1

[back to list](#)

[Protein Coverage](#) | [Supporting Peptides](#) |

Protein Coverage:

1TWGPPAARLS FAAPWVHASL PRLNHAPSVE SSSSSSAMAE EKPQVELFVK AGSDGAKIGN CPFSQRLFMV LWLK**GVTFNV**

81**TTVDTK**RRTE AVQKLCPGGQ LPFLMYGTEV HTDTNKVEEF LEEVLCPPKY PK**LAANNPES NTAGLDVFAK**FSAYIKNSNP

161SLNANLEKGL LKALKVLDVY LMTPQPEEVD ENSAEDEGQS NRKFLDGNEL TLADCNLLPK LHIVKVVCKK YRDFTIPEEF

241RGIHRYLKNA YAREEFSSTC PDDEEIELAY ELVAKALK

Supporting Peptides:

| Peptide                  | Uniq  | -10lgP    | Mass      | Length | ppm      | m/z      | z     | RT    | Fraction | Scan     | Source File               | Area F1 | Area F2 | Area F3 | Are  |
|--------------------------|-------|-----------|-----------|--------|----------|----------|-------|-------|----------|----------|---------------------------|---------|---------|---------|------|
| K.LAANNPESNTAGLDVFAK.F Y | 72.78 | 1830.9111 | 18        | 1.0    | 916.4637 | 2        | 47.50 | 4     |          | F4:13719 | 17112021_RID_2349_DP4.raw |         |         |         | 4.70 |
| K.GVTFNVTTVDTK.R         | Y     | 48.38     | 1280.6613 | 12     | 1.0      | 641.3386 | 2     | 41.97 | 4        | F4:11922 | 17112021_RID_2349_DP4.raw |         |         |         | 6.49 |
| total 2 peptides         |       |           |           |        |          |          |       |       |          |          |                           |         |         |         |      |

TRINITY\_DN178

[back to list](#)

[Protein Coverage](#) | [Supporting Peptides](#) |

Protein Coverage:

1SSTGGSRVEASRPEPRGGRLFPRGPSQQGP LAGWLGSVPG RGRSSGGKLR RSCESRLIGA APGSPPALPR RPLGPREPPL

81PSQSVQASSSSSSAMAEKPKQVELFVKA GSDGAKIGNC PFSQRLFMVL WLKGVTFNVT TVDTKRRTEA VQKLCPPGGQL

161PFLMYGTEVHTDTNKIEEFL EEVLCPPRYP KLAANNPESN TAGLDVFAKF SAYIKNSNPS LNALEKGLL KALKVLDVYL

241MTPQPEEVDENSAEDEGQSN RKFLDGNELT LADCNLLPKL HIVKVVCCKY RNFTIPEEFC GIHRYLKNA YAREEFASCTP

321DDEEIELAYE LVAKALK

Supporting Peptides:

| Peptide                  | Uniq  | -10lgP    | Mass      | Length | ppm      | m/z      | z     | RT    | Fraction | Scan                      | Source File               | Area F1 | Area F2 | Area F3 | Area |
|--------------------------|-------|-----------|-----------|--------|----------|----------|-------|-------|----------|---------------------------|---------------------------|---------|---------|---------|------|
| K.LAANNPESNTAGLDVFAK.F Y | 72.78 | 1830.9111 | 18        | 1.0    | 916.4637 | 2        | 47.50 | 4     | F4:13719 | 17112021_RID_2349_DP4.raw |                           |         |         |         | 4.70 |
| K.GVTFNVTTVDTK.R         | Y     | 48.38     | 1280.6613 | 12     | 1.0      | 641.3386 | 2     | 41.97 | 4        | F4:11922                  | 17112021_RID_2349_DP4.raw |         |         |         | 6.49 |
| total 2 peptides         |       |           |           |        |          |          |       |       |          |                           |                           |         |         |         |      |

LAB63521.1

[back to list](#)

[Protein Coverage](#) | [Supporting Peptides](#) |

Protein Coverage:

1MAEEKPQVEL FVKAGSDGAK IGNCPFSQRL FMVLWLKGVTFNVT TVDTKRRTEAVQKLCPP GGQLPFLMYG TEVHTDTNKV

81EEFLEEVLCP PKYPKLAANN PESNTAGLDV FAKFSAYIKN SNPSLNANLE KGLLKALKVL DLYLMTTPQE EVDENSAEDE

161GQSNRKFLDG NELTLADCNL LPKLHIVKV CKKYRDF TIP EEFRGIHRYL KNAYAREEFS STCPDDEEIE LAYELVAKAL

241K

Supporting Peptides:

| Peptide                  | Uniq  | -10lgP    | Mass      | Length | ppm      | m/z      | z     | RT    | Fraction | Scan                      | Source File               | Area F1 | Area F2 | Area F3 | Area |
|--------------------------|-------|-----------|-----------|--------|----------|----------|-------|-------|----------|---------------------------|---------------------------|---------|---------|---------|------|
| K.LAANNPESNTAGLDVFAK.F Y | 72.78 | 1830.9111 | 18        | 1.0    | 916.4637 | 2        | 47.50 | 4     | F4:13719 | 17112021_RID_2349_DP4.raw |                           |         |         |         | 4.70 |
| K.GVTFNVTTVDTK.R         | Y     | 48.38     | 1280.6613 | 12     | 1.0      | 641.3386 | 2     | 41.97 | 4        | F4:11922                  | 17112021_RID_2349_DP4.raw |         |         |         | 6.49 |
| total 2 peptides         |       |           |           |        |          |          |       |       |          |                           |                           |         |         |         |      |

JAG68347.1

[back to list](#)

[Protein Coverage](#) | [Supporting Peptides](#) |

Protein Coverage:

1MAEEKPQVEL FVKAGSDGAK IGNCPFSQRL FMVLWLKGVTFNVT TVDTKRRTEAVQKLCPP GGQLPFLMYG TEVHTDTNKV

81EEFLEEVLCP PKYPKLAANN PESNTAGLDV FAKFSAYIKN SNPSLNANLE KGLLKALKVL BVYLMTPQE EVDENSAEDE

161GQSNRKFLDG NELTLADCNL LPKLHIVKV CKKYRDF TIP EEFRGIHRYL KNAYAREEFS STCPDDEEIE LAYELVAKAL

241K

Supporting Peptides:

| Peptide                  | Uniq  | -10lgP    | Mass      | Length | ppm      | m/z      | z     | RT    | Fraction | Scan                      | Source File               | Area F1 | Area F2 | Area F3 | Area F4 |
|--------------------------|-------|-----------|-----------|--------|----------|----------|-------|-------|----------|---------------------------|---------------------------|---------|---------|---------|---------|
| K.LAANNPESNTAGLDVFAK.F Y | 72.78 | 1830.9111 | 18        | 1.0    | 916.4637 | 2        | 47.50 | 4     | F4:13719 | 17112021_RID_2349_DP4.raw |                           |         |         |         | 4.70    |
| K.GVTFNVTTVDTK.R         | Y     | 48.38     | 1280.6613 | 12     | 1.0      | 641.3386 | 2     | 41.97 | 4        | F4:11922                  | 17112021_RID_2349_DP4.raw |         |         |         | 6.49    |
| total 2 peptides         |       |           |           |        |          |          |       |       |          |                           |                           |         |         |         |         |

ETE58466.1

[back to list](#)

[Protein Coverage](#) | [Supporting Peptides](#) |

Protein Coverage:

1MVELVEILGI LEEARRGEVK VKRKGVRKAL CERGKGGGER EGRKKEGKRR RKKEGKERRR EGEKERREKR EKRRERKKKK

81ERPFPIAKKE RKKERQAIWL FLAGSDGAKI GNCPPFSQRLF MVLWLKGVTFNVT TVDTKRYPKLAANNPES NTAGLDVFAK

161FSAYIKNSNP SLNANLEKGL LKALKVLDIY LMTQPEEVD ENSAEDEGQS NRKFLDGNEL TLADCNLLPK LHIVKVVCCK

241YRDFTIPEEF RGIHRYLKNA YAREEFSSTC PDDEEIELAY ELVAKALK

Supporting Peptides:

| Peptide                  | Uniq  | -10lgP    | Mass      | Length | ppm      | m/z      | z     | RT    | Fraction | Scan                      | Source File               | Area F1 | Area F2 | Area F3 | Area F4 |
|--------------------------|-------|-----------|-----------|--------|----------|----------|-------|-------|----------|---------------------------|---------------------------|---------|---------|---------|---------|
| K.LAANNPESNTAGLDVFAK.F Y | 72.78 | 1830.9111 | 18        | 1.0    | 916.4637 | 2        | 47.50 | 4     | F4:13719 | 17112021_RID_2349_DP4.raw |                           |         |         |         | 4.70    |
| K.GVTFNVTTVDTK.R         | Y     | 48.38     | 1280.6613 | 12     | 1.0      | 641.3386 | 2     | 41.97 | 4        | F4:11922                  | 17112021_RID_2349_DP4.raw |         |         |         | 6.49    |
| total 2 peptides         |       |           |           |        |          |          |       |       |          |                           |                           |         |         |         |         |

TRINITY\_DN7999

[back to list](#)

[Protein Coverage](#) | [Supporting Peptides](#) |

Protein Coverage:

|     |                    |                    |                    |            |            |            |            |            |              |                                                                                     |
|-----|--------------------|--------------------|--------------------|------------|------------|------------|------------|------------|--------------|-------------------------------------------------------------------------------------|
| 1   | MTPHFLILIM         | LFAFSKGLS          | <b>QIVLTQSDPV</b>  | LKKPGEAHKL | TCAVTGFNVN | SYWMGWIRQK | PGQGLEWLVR | YYDTS      | <b>NTIYY</b> | 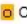 |
| 81  | <b>SPTIQGR</b> FTP | SK <b>DSSNFYLQ</b> | <b>MNNLKA</b> EDTA | VYYCARDRQV | RDFYYWGKGT | TVTVTSA    | GKT        | APTVFPLSPC | NQDIATASLV   |                                                                                     |
| 161 | SIGCFIKGYF         | PEPATVQWNS         | GAITSGIQNF         | PPVLLASNHY | SHTSLLTIPA | SQWQSESFQC | NVEHAATNTR | INKIERSAI  |              |                                                                                     |
| 241 | RSPVGPEITV         | FHSCDSRSD          | GTVQLWCHIS         | GFYPKQLDID | WKVGSRSQGL | HPYNYPPWQN | PGTYTFSTAS | VVNITQDDWL |              |                                                                                     |
| 321 | EGNSYYCEAT         | HAASQTKVKG         | KAKKCKDGSS         | CPSGDIKVDI | LPPRPKALYI | DRNSKISCVV | SNLQNEQGLK | FTWFREKSGH |              |                                                                                     |
| 401 | LTPDAIETTE         | GSNGGYIVLS         | RLGIFSEDWD         | SGETFTCVVE | HPTFVSPVTK | KISKSRGKHS | APKVYVFPFH | QEELNPGRSV |              |                                                                                     |
| 481 | SLTCLVTGFS         | PEAADVQWLE         | DHNPLSEDNS         | VTTPPMKNKH | DDSFLYLSKL | LVPKTDWNTK | SFTCMVVHED | LPMKFTQRNI |              |                                                                                     |
| 561 | SRTQGKK            |                    |                    |            |            |            |            |            |              |                                                                                     |

Supporting Peptides:

| Peptide                  | Uniq | -10lgP | Mass      | Length | ppm | m/z      | z | RT    | Fraction | Scan     | Source File               | Area F1 | Area F2 | Area F3 | Area F |
|--------------------------|------|--------|-----------|--------|-----|----------|---|-------|----------|----------|---------------------------|---------|---------|---------|--------|
| K.DSSNFYLMNNLK.A         | Y    | 63.76  | 1572.7242 | 13     | 0.8 | 787.3700 | 2 | 52.45 | 7        | F7:15573 | 17112021_RID_2349_DP7.raw |         |         |         |        |
| K.DSSNFYLM(+15.99)NNLK.A | Y    | 48.08  | 1588.7191 | 13     | 1.4 | 795.3679 | 2 | 43.09 | 7        | F7:12421 | 17112021_RID_2349_DP7.raw |         |         |         |        |
| S.NTIYYSPTIQGR.F         | Y    | 42.97  | 1411.7096 | 12     | 1.2 | 706.8629 | 2 | 39.01 | 7        | F7:11021 | 17112021_RID_2349_DP7.raw |         |         |         |        |
| S.QIVLTQSDPVLK.K         | Y    | 42.47  | 1339.7711 | 12     | 0.7 | 670.8933 | 2 | 59.10 | 7        | F7:17836 | 17112021_RID_2349_DP7.raw |         |         |         |        |

total 4 peptide

JAV50725.1

[back to list](#)

[Protein Coverage](#) | [Supporting Peptides](#) |

Protein Coverage:

|     |            |            |            |                   |                    |                    |                    |                    |            |  |
|-----|------------|------------|------------|-------------------|--------------------|--------------------|--------------------|--------------------|------------|--|
| 1   | MVSPRTCINK | LGSTLPLLLV | LWDLHYEGVQ | CGINAEVEKQ        | LELGKKLLAA         | GQLADALSHF         | HAAIEGDADN         | YLAYYRRATV         |            |  |
| 81  | YLAMGKSKAA | IRDLSRVVEL | KQDFTSARLQ | RGHLLLKQGK        | LNEAVEDFEG         | VLLSNPNDE          | EGEARAQLLK         | SDEARNLRSQ         |            |  |
| 161 | AQSAFLES   | DY         | YTAITLLDKI | LEVCVWDVDM        | RELRAESYIK         | EGEPGKAISD         | LKAAAK <b>LKSD</b> | <b>NTEAFYK</b> IST | IYYELGDHEM |  |
| 241 | SLSEVRECLK | LDQDHKECFS | HYKRIKKLNK | <b>QIVSAEDLIQ</b> | <b>ER</b> RYQEATEK | YEAVMKMETN         | VPVYTTRAKE         | RICHCLSKNQ         |            |  |
| 321 | QSTEAIKVCT | EVLQLEPENV | NALKDRAEAY | LLEEMYEEAI        | QDYETAKKHS         | DNDQQILESL         | EKAQRMLKQS         | QKRDIYKILG         |            |  |
| 401 | VKRNARKQEI | IKAYRKLAMQ | WHPDNFQDEE | EKKKAEEKFI        | DIAAAK <b>EVLT</b> | <b>DPEMR</b> KKFDA | GEDPLDAESQ         | QGGGHPFHRS         |            |  |
| 481 | WNSWQGFDPF | SSGGPFQFKF | HFN        |                   |                    |                    |                    |                    |            |  |

Supporting Peptides:

| Peptide          | Uniq | -10lgP | Mass      | Length | ppm | m/z      | z | RT    | Fraction | Scan     | Source File               | Area F1 | Area F2 | Area F3  | Area F4 | Area F5 |
|------------------|------|--------|-----------|--------|-----|----------|---|-------|----------|----------|---------------------------|---------|---------|----------|---------|---------|
| K.QIVSAEDLIQER.R | Y    | 58.67  | 1399.7307 | 12     | 0.2 | 700.8728 | 2 | 46.91 | 3        | F3:13615 | 17112021_RID_2349_DP3.raw |         |         | 9.5286E4 |         |         |
| K.LKSDNTEAFYK.I  | N    | 47.39  | 1314.6455 | 11     | 1.2 | 658.3308 | 2 | 27.25 | 7        | F7:6950  | 17112021_RID_2349_DP7.raw |         |         |          |         |         |
| K.EVLTDPEMR.K    | N    | 42.20  | 1088.5172 | 9      | 0.9 | 545.2664 | 2 | 34.55 | 7        | F7:9479  | 17112021_RID_2349_DP7.raw |         |         |          |         |         |

total 3 peptides

ADP88560.1

[back to list](#)

[Protein Coverage](#) | [Supporting Peptides](#) |

Protein Coverage:

|     |            |            |                    |                    |                   |                    |            |            |                                                                                       |
|-----|------------|------------|--------------------|--------------------|-------------------|--------------------|------------|------------|---------------------------------------------------------------------------------------|
| 1   | MVLIKVLANL | LVLQLSYAQK | SSELVVGDE          | CNINEHRSLV         | FLYNNISFGCS       | GTLINQQWVL         | SAVHCDMENV | RIYLGVHNLT | 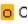 |
| 81  | LRNNAEIRLP | EERFFCLSNK | NYTK <b>WDKDIM</b> | <b>LIK</b> LDRPVKT | <b>STYIAPLSLP</b> | <b>SSPPR</b> VGSVC | RIMGWGAITS | PNETFPGVTH |                                                                                       |
| 161 | CANINILPYS | VCRAAYKGLP | AQSRTLGGI          | LEGGIGSCMG         | DSGGPLICNG        | EMHGIVAWGD         | DTCAQPHKPV | HYTKVYDYTD |                                                                                       |
| 241 | WIQSIIAGNT | AATCPP     |                    |                    |                   |                    |            |            |                                                                                       |

Supporting Peptides:

| Peptide               | Uniq | -10lgP | Mass      | Length | ppm  | m/z      | z | RT    | Fraction | Scan     | Source File               | Area F1  | Area F2  | Area F   |
|-----------------------|------|--------|-----------|--------|------|----------|---|-------|----------|----------|---------------------------|----------|----------|----------|
| K.TSTYIAPLSLPSSPPR.V  | Y    | 65.05  | 1685.8988 | 16     | 0.6  | 843.9572 | 2 | 51.64 | 7        | F7:15270 | 17112021_RID_2349_DP7.raw | 3.9743E5 | 3.772E5  |          |
| K.WDKDIMLIK.L         | N    | 57.12  | 1160.6263 | 9      | -0.1 | 581.3204 | 2 | 46.64 | 2        | F2:13338 | 12112021_RID_2349_DP2.raw | 2.1169E5 | 9.915E6  | 1.5104E6 |
| K.WDKDIM(+15.99)LIK.L | N    | 52.20  | 1176.6212 | 9      | -0.2 | 589.3177 | 2 | 41.27 | 2        | F2:11445 | 12112021_RID_2349_DP2.raw | 6.6323E6 | 2.1157E6 |          |

total

E5L0E4.1

[back to list](#)

Protein Coverage:

### Supporting Peptides:

| Peptide               | Uniq | -10lgP | Mass      | Length | ppm  | m/z      | z | RT    | Fraction | Scan     | Source File               | Area F1  | Area F2  | Area F3  |
|-----------------------|------|--------|-----------|--------|------|----------|---|-------|----------|----------|---------------------------|----------|----------|----------|
| K.TSTYIAPLSLPSSPPR.V  | Y    | 65.05  | 1685.8988 | 16     | 0.6  | 843.9572 | 2 | 51.64 | 7        | F7:15270 | 17112021_RID_2349_DP7.raw | 3.9743E5 | 3.772E5  |          |
| K.WDKDIMLIK.L         | N    | 57.12  | 1160.6263 | 9      | -0.1 | 581.3204 | 2 | 46.64 | 2        | F2:13338 | 12112021_RID_2349_DP2.raw | 2.1169E5 | 9.915E6  | 1.5104E6 |
| K.WDKDIM(+15.99)LIK.L | N    | 52.20  | 1176.6212 | 9      | -0.2 | 589.3177 | 2 | 41.27 | 2        | F2:11445 | 12112021_RID_2349_DP2.raw |          | 6.6323E6 | 2.1157E6 |
|                       |      |        |           |        |      |          |   |       |          |          |                           |          |          | total    |

[back to list](#)

Protein Coverage:

### Supporting Peptides:

[illegible]

[back to list](#)

Protein Coverage:

### Supporting Peptides:

| Peptide | Uniq -10lgP | Mass | Length | ppm | m/z | z | RT | Fraction | Scan | Source File | Area F1 | Area F2 | Area F3 | Area F4 | Area F5 | Area F6 |
|---------|-------------|------|--------|-----|-----|---|----|----------|------|-------------|---------|---------|---------|---------|---------|---------|
|---------|-------------|------|--------|-----|-----|---|----|----------|------|-------------|---------|---------|---------|---------|---------|---------|

| Peptide        | Uniq | -10lgP | Mass      | Length | ppm | m/z      | z | RT    | Fraction | Scan     | Source File               | Area F1 | Area F2 | Area F3 | Area F4 | Area F5 | Area F6 |
|----------------|------|--------|-----------|--------|-----|----------|---|-------|----------|----------|---------------------------|---------|---------|---------|---------|---------|---------|
| R.AISTMMSER.V  | Y    | 54.88  | 1024.4681 | 9      | 0.2 | 513.2415 | 2 | 31.14 | 7        | F7:8285  | 17112021_RID_2349_DP7.raw |         |         |         |         |         |         |
| K.GTVLLDLQER.S | Y    | 50.80  | 1142.6295 | 10     | 0.8 | 572.3225 | 2 | 45.59 | 7        | F7:13262 | 17112021_RID_2349_DP7.raw |         |         |         |         |         |         |
| R.NDSYLAEGR.Q  | Y    | 47.45  | 1023.4621 | 9      | 0.6 | 512.7386 | 2 | 26.44 | 7        | F7:6652  | 17112021_RID_2349_DP7.raw |         |         |         |         |         |         |

total 3 peptides

XP\_013918193.1  
[back to list](#)

| [Protein Coverage](#) | [Supporting Peptides](#) |  
Protein Coverage:

|     |            |            |             |               |                    |                    |                    |             |            |  |  |  |  |  |  |  |  |
|-----|------------|------------|-------------|---------------|--------------------|--------------------|--------------------|-------------|------------|--|--|--|--|--|--|--|--|
| 1   | MERVSMGKAG | SYQRHMDTSS | SSSSEEEPRG  | TEPAKPLISH    | KASHNSYVEL         | HELVMDKNNE         | FRWMEASHWI         | KLEEDFEEMG  |            |  |  |  |  |  |  |  |  |
| 81  | HWGRPHLSYL | TFQSLLEVRK | AFSK        | <b>GTVLLD</b> | <b>LQER</b> SLAGIA | NQVLSQMIYE         | GKLKPDQEV          | LLRTLQLQHS  | HPSESASLNT |  |  |  |  |  |  |  |  |
| 161 | LLPALVQRTD | TKDSTQPLLQ | EHQQIEMKTF  | SNGSEQGESS    | HSDFKKQLLD         | KIPPDAAEATL        | GLVGCATFLD         | RPTVAFVRLK  |            |  |  |  |  |  |  |  |  |
| 241 | EAVELDSVLE | VPVPVRFLFV | VLGPDSPHIS  | YHEIGR        | <b>AIST</b>        | <b>MMSER</b> VFRND | <b>SYLAEGR</b> QDL | IKSLDEFLDC  | CIVLPPSEIQ |  |  |  |  |  |  |  |  |
| 321 | NERLLKMLLP | VQKDFLRKRY | LPVEKKLEEP  | LKDLGHKLKD    | HDITAEDSDD         | SLRRTGKIFG         | GMVKDIKRRY         | PKYLS DIKDA |            |  |  |  |  |  |  |  |  |
| 401 | LNPQCLAAVI | FIYFAALSPA | ITFGGLLAEK  | TERLIGVSEL    | LLSTAVQSGL         | FCLLGAQPLL         | VVGFSGPLLV         | FEEAFYAFCV  |            |  |  |  |  |  |  |  |  |
| 481 | NKNYEYLVGR | VWIGFWLILI | VVVVVAFEGS  | FLVRFISRYT    | QEIFSILISL         | IFILETFFKL         | IKIFKEHPLK         | EVYKNITYPP  |            |  |  |  |  |  |  |  |  |
| 561 | DEEPRYPVPN | TALLSLVLMG | GTFFIAFFLR  | KFKNSSFFPG    | KLRRVIGDFG         | VPIAIFIMTL         | ADYLIKDTYT         | QKLKVPKGLQ  |            |  |  |  |  |  |  |  |  |
| 641 | VSNPEQRNWF | IHPLGSSLG  | PFPIWMMFAT  | ALPALLVFIL    | IFLETQITTL         | IVSKPERKML         | KSGSFHLDLL         | LIVGMGGIAP  |            |  |  |  |  |  |  |  |  |
| 721 | LLGMPWLSAT | TVRTVTHANA | LTVM SKTTLP | GEKACIQEVK    | EQRVTGFLVA         | ILVGLSILME         | PILKLIPLAV         | LFGIFLYMGV  |            |  |  |  |  |  |  |  |  |
| 801 | TSLNGIQLYD | RILLLLKPPK | YHPDVSYVTK  | VKTWRMHIFT    | FTQMLCLGLL         | WGVKSSPASL         | ALPFILILTV         | PLRLFLLPFI  |            |  |  |  |  |  |  |  |  |
| 881 | FTDVELKCLD | ADDAEVTFDE | TEGQDVYDEV  | QMPV          |                    |                    |                    |             |            |  |  |  |  |  |  |  |  |

Supporting Peptides:

| Peptide        | Uniq | -10lgP | Mass      | Length | ppm | m/z      | z | RT    | Fraction | Scan     | Source File               | Area F1 | Area F2 | Area F3 | Area F4 | Area F5 | Area F6 |
|----------------|------|--------|-----------|--------|-----|----------|---|-------|----------|----------|---------------------------|---------|---------|---------|---------|---------|---------|
| R.AISTMMSER.V  | Y    | 54.88  | 1024.4681 | 9      | 0.2 | 513.2415 | 2 | 31.14 | 7        | F7:8285  | 17112021_RID_2349_DP7.raw |         |         |         |         |         |         |
| K.GTVLLDLQER.S | Y    | 50.80  | 1142.6295 | 10     | 0.8 | 572.3225 | 2 | 45.59 | 7        | F7:13262 | 17112021_RID_2349_DP7.raw |         |         |         |         |         |         |
| R.NDSYLAEGR.Q  | Y    | 47.45  | 1023.4621 | 9      | 0.6 | 512.7386 | 2 | 26.44 | 7        | F7:6652  | 17112021_RID_2349_DP7.raw |         |         |         |         |         |         |

total 3 peptides

XP\_034271810.1  
[back to list](#)

| [Protein Coverage](#) | [Supporting Peptides](#) |  
Protein Coverage:

|     |                    |             |             |            |            |              |               |                    |                    |  |  |  |  |  |  |  |  |
|-----|--------------------|-------------|-------------|------------|------------|--------------|---------------|--------------------|--------------------|--|--|--|--|--|--|--|--|
| 1   | MSICQHICIS         | FSQYSCPGHQ  | GIYHLSKRRR  | MERVSMGKAG | SYQRHVDTS  | SSSSEEEPRG   | TEPAKPLISH    | KASHNSYVEL         |                    |  |  |  |  |  |  |  |  |
| 81  | HELVMDKNNE         | FRWMEASHWI  | KLEEDFEEMG  | HWGRPHLSYL | TFQSLLEVRK | AFSK         | <b>GTVLLD</b> | <b>LQER</b> SLAGIA | NQVLSQMIYE         |  |  |  |  |  |  |  |  |
| 161 | GKLKPDQEV          | LLRTLQLQHS  | HPSESASLNT  | LLPARVQRTD | AKDSTQPLLQ | EHQIEMKTF    | SNGSEQGESS    | HSGFKKQLLD         |                    |  |  |  |  |  |  |  |  |
| 241 | KIPPDAAEATL        | GLVGCATFLD  | RPTLAFVRLK  | EAVELDSVLE | VPVPVRFLFV | VLGPDSPHIN   | YHEIGR        | <b>AIST</b>        | <b>MMSER</b> VFRND |  |  |  |  |  |  |  |  |
| 321 | <b>SYLAEGR</b> QDL | IKSLDEFLDC  | CIVLPPSEIQ  | NERLLKMLLP | VQKDFLRKRY | LPVEKKLEEP   | LKDLAHKLKD    | HDITAEDSDD         |                    |  |  |  |  |  |  |  |  |
| 401 | PLRRTGRIFG         | GLVKDIKRRY  | PKYLS DIKDA | LNPQCLAAVI | FIYFAALSPA | ITFGGLLAEK   | TERLIGVSEL    | LLSTAVQSGL         |                    |  |  |  |  |  |  |  |  |
| 481 | FCLLGAQPLL         | VVGFSGPLLV  | FEKAFYAFCT  | NYNIEYLVGR | VWIGFWLILI | VILVVAFEGS   | FLVRYISRYT    | QEIFSILISL         |                    |  |  |  |  |  |  |  |  |
| 561 | IFIQETFSNL         | IKIFKAHPLK  | GVYKNITFSG  | EEEPREPVPN | TALLSLVLMG | GTFFIAFFLR   | KFKNSSFFPG    | KLRRVIGDFG         |                    |  |  |  |  |  |  |  |  |
| 641 | VPIAIFIMTL         | ADNLIKDTYT  | QKLKVPKGLQ  | VSNTDKRDWF | IHPLKEPIPK | WFLFAAALPA   | LLVFILIFLE    | TQITTLIVSK         |                    |  |  |  |  |  |  |  |  |
| 721 | PERKLLKGSG         | FHLDLLLV    | MGGIAPLLGM  | PWLSATTVRT | VTHANALTIM | SKTTLPGKA    | CIQEVKEQRI    | TGFLVALLVG         |                    |  |  |  |  |  |  |  |  |
| 801 | LSILMEPIPK         | LIPLAVLFGI  | FLYMGVTSLS  | GIQLYDRILL | MLKPPKYHPD | VS YVTKV KSW | RMHIFTFSQI    | LCLGLLWGVK         |                    |  |  |  |  |  |  |  |  |
| 881 | SSPASLALPF         | ILILTVP LRR | FLLPVIFTDI  | ELKCLDADDA | EVTFDETEGQ | DVYDEVQMPV   |               |                    |                    |  |  |  |  |  |  |  |  |

Supporting Peptides:

| Peptide        | Uniq | -10lgP | Mass      | Length | ppm | m/z      | z | RT    | Fraction | Scan     | Source File               | Area F1 | Area F2 | Area F3 | Area F4 | Area F5 | Area F6 |
|----------------|------|--------|-----------|--------|-----|----------|---|-------|----------|----------|---------------------------|---------|---------|---------|---------|---------|---------|
| R.AISTMMSER.V  | Y    | 54.88  | 1024.4681 | 9      | 0.2 | 513.2415 | 2 | 31.14 | 7        | F7:8285  | 17112021_RID_2349_DP7.raw |         |         |         |         |         |         |
| K.GTVLLDLQER.S | Y    | 50.80  | 1142.6295 | 10     | 0.8 | 572.3225 | 2 | 45.59 | 7        | F7:13262 | 17112021_RID_2349_DP7.raw |         |         |         |         |         |         |
| R.NDSYLAEGR.Q  | Y    | 47.45  | 1023.4621 | 9      | 0.6 | 512.7386 | 2 | 26.44 | 7        | F7:6652  | 17112021_RID_2349_DP7.raw |         |         |         |         |         |         |

total 3 peptides

XP\_013918195.1  
[back to list](#)

| [Protein Coverage](#) | [Supporting Peptides](#) |

Protein Coverage:

1 MQKKSIVELH ELVMDKNEF RWMEASHWIK LEEDFEEMGH WGRPHLSYLT FQSLLEVRKA FSK**GTVLLDL QER**SLAGIAN

81 QVLSQMIYEG KLPDDQEV LRTLLQHS PSESASLNTL LPALVQRTDT KDSTQPLLQE HQQIEMKTFS NGSEQGESSH

161 SDFKKQLLDK IPPDAEATLG LVGCATFLDR PTVAFVRLKE AVELDSVLEV VVPVRFLFVV LGPDSPHISY HEIGR**AISTM**

241 **MSERVFRNDS YLAEGR**QDLI KSLDEFLDCC IVLPPSEIQN ERLKMLLPV QKDFLRKRYL PVEKKLEEPL KDLGHKLKDH

321 DITAEDSDDS LRRTGKIFGG MVKDIKRRYP KYLSDIKDAL NPQCLAAVIF IYFAALSPAI TFGGLLAECT ERLIGVSELL

401 LSTAVQSGLF CLLGAQPLL VGFSGPLL V EAFYAFVCN KNYEYLVRV WIGFWLILIV VVVAFEGSF LVRFISRYTQ

481 EIFSILISLI FILETFFKLI KIFKEHPLKE VYKNITYPPD EEPYPVPNT ALLSLVLMGG TFFIAFFLRK FKNSSFFPGK

561 LRRVIGDFGV PIAIFIMTLA DYLIKDTYTQ KLKVPKGLQV SNPEQRNWFH HPLGSSSLGNP FPIWMMFATA LPALLVFILI

641 FLETQITTLI VSKPERKMLK GSGFHLDLLL IVGMGGIAPL LGMPWLSATT VRTVTHANAL TVMSKTTLPGE EKACIQEVKE

721 QRVTFGLVAI LVGLSILMEP ILKLIPLAVL FGIFLYMGVT SLNGIQLYDR ILLLLKPPKY HPDVSIVTKV KTRWMHIFTF

801 TQMLCLGLLW GVKSSPASLA LPFILILTVP LRLFLLPFIF TDVELKCLDA DDAEVTDFET EGQDVYDEVQ MPV

Supporting Peptides:

| Peptide        | Uniq | -10lgP | Mass      | Length | ppm | m/z      | z | RT    | Fraction | Scan     | Source File               | Area F1 | Area F2 | Area F3 | Area F4 | Area F5 | Area F6 |
|----------------|------|--------|-----------|--------|-----|----------|---|-------|----------|----------|---------------------------|---------|---------|---------|---------|---------|---------|
| R.AISTMMSER.V  | Y    | 54.88  | 1024.4681 | 9      | 0.2 | 513.2415 | 2 | 31.14 | 7        | F7:8285  | 17112021_RID_2349_DP7.raw |         |         |         |         |         |         |
| K.GTVLLDLQER.S | Y    | 50.80  | 1142.6295 | 10     | 0.8 | 572.3225 | 2 | 45.59 | 7        | F7:13262 | 17112021_RID_2349_DP7.raw |         |         |         |         |         |         |
| R.NDSYLAEGR.Q  | Y    | 47.45  | 1023.4621 | 9      | 0.6 | 512.7386 | 2 | 26.44 | 7        | F7:6652  | 17112021_RID_2349_DP7.raw |         |         |         |         |         |         |

total 3 peptides

XP\_013918194.1

[back to list](#)

[Protein Coverage](#) | [Supporting Peptides](#) |

Protein Coverage:

1 MASQEDYESG IKAKLDVEAY GDSSLKQSNM SLASGNSSSS SSEEPRGTE PAKPLISHKA SHNSYVELHE LVMDKNEFR

81 WMEASHWIKL EEDFEEMGHW GRPHLSYLT FQSLLEVRKAF SK**GTVLLDLQ ER**SLAGIANQ VLSQMIYEGK LKPDQEVLL

161 RTLLQHSHP SESASLNTLL PALVQRTDTK DSTQPLLQEH QQIEMKTFSN GSEQGESSHS DFKQLLDKI PPDAEATLGL

241 VGCATFLDRP TVAFVRLKEA VELDSVLEVP VVPVRFLFVVL GPDSPHISYH EIGR**AISTM SERVFRNDSY LAEGR**QDLIK

321 SLDEFLDCCI VLPPSEIQNE RLLKMLLPVQ KDFLRKRYLP VEKKLEEPLK DLGHKLKDH ITAEDSDDSL RRTGKIFGGM

401 VKDIKRRYPK YLSDIKDALN PQCLAAVIFI YFAALSPAIT FGGLLAEKTE RLIGVSELLL STAVQSGLFC LLGAQPLL V

481 GFGPLL VFE EAFYAFVCN KNYEYLVRVW IGFWLILIV VVVAFEGSFL VRFISRYTQE IFSILISLIF ILETFFKLIK

561 IFKEHPLKEV YKNITYPPDE EPRYPVPNTA LLSLVLMGGT FFI AFFLRKF KNSFFPGKL RRVIGDFGV IAIFIMTLAD

641 YLIKDTYTQK LKVPKGLQVS NPEQRNWFH PLGSSSLGNPF PIWMMFATAL PALLVFILIF LETQITTLIV SKPERKMLKG

721 SGFHLDLLLI VGMGGIAPLL GMPWLSATTV RTVTHANALT VMSKTTLPGE KACIQEVKEQ RVTGFLVAIL VGLSILMEPI

801 LKLIPLAVLF GIFLYMGVTS LNGIQLYDRI LLLKPPKYH PDVSIVTKV KTRWMHIFTFT QMLCLGLLW GVKSSPASLA

881 PFILILTVP RLFLLPFIFT DVELKCLDAD DAEVTDFETE GQDVYDEVQM PV

Supporting Peptides:

| Peptide        | Uniq | -10lgP | Mass      | Length | ppm | m/z      | z | RT    | Fraction | Scan     | Source File               | Area F1 | Area F2 | Area F3 | Area F4 | Area F5 | Area F6 |
|----------------|------|--------|-----------|--------|-----|----------|---|-------|----------|----------|---------------------------|---------|---------|---------|---------|---------|---------|
| R.AISTMMSER.V  | Y    | 54.88  | 1024.4681 | 9      | 0.2 | 513.2415 | 2 | 31.14 | 7        | F7:8285  | 17112021_RID_2349_DP7.raw |         |         |         |         |         |         |
| K.GTVLLDLQER.S | Y    | 50.80  | 1142.6295 | 10     | 0.8 | 572.3225 | 2 | 45.59 | 7        | F7:13262 | 17112021_RID_2349_DP7.raw |         |         |         |         |         |         |
| R.NDSYLAEGR.Q  | Y    | 47.45  | 1023.4621 | 9      | 0.6 | 512.7386 | 2 | 26.44 | 7        | F7:6652  | 17112021_RID_2349_DP7.raw |         |         |         |         |         |         |

total 3 peptides

XP\_034271811.1

[back to list](#)

[Protein Coverage](#) | [Supporting Peptides](#) |

Protein Coverage:

1 MASQEDYESG IKAKLDLEAY GDSSLKQSNM SLASGDSSSS SSEEPRGTE PAKPLISHKA SHNSYVELHE LVMDKNNEFR

81 WMEASHWIKL EEDFEEMGHW GRPHLSYLT FQSLLEVRKAF SKGTVLLDLQ ERSLAGIANQ VLSQMIYEGK LKPDDQEVLL

161 RTLLLQHSHP SESASLNTLL PARVQRTDAK DSTQPLLQEH HQIEMKTFSN GSEQGESSHS GFKKQLLDKI PPDAEATLGL

241 VGCATFLDRP TLAFVRLKEA VELDSVLEVP VPVRFLEFVVL GPDSPHINYH EIGRAISTMMSERVFRNDSY LAEGRQDLIK

321 SLDEFLDCCI VLPPSEIQNE RLLKMLLPVQ KDFLRKRYLP VEKKLEEPLK DLAHKLKDH ITAEDSDDPL RRTGRIFGG

401 VKDIKRRYPK YLSDIKDALN PQCLAAVIFI YFAALSPAIT FGGLLAEETE RLIGVSELL STAVQSGFLC LLGAQPLL

481 GFSGPLLVE KAFYAFCTNY NIEYLVRVW IGFWLILIVI LVVAFEGSFL VRYISRYTQE IFSILISLIF IQETFSNLIK

561 IFKAHPLKGV YKNITFSGEE EPREPVPNTA LLSLVLMGGT FFIAFFLRKF KNSSFFPGRL RRVIGDFGVP IAIFIMTLAD

641 NLIKDTYTQK LKVPKGLQVS NTDKRDWFIH PLKEPIPKWF LFAAALPALL VFILIFLETQ ITTLIVSKPE RKLLKGSGFH

721 LDLLLIVGMG GIAPLLGMPW LSATTVRTVT HANALTIMSK TTLPGEKACI QEVKEQRITG FLVALLVGLS ILMEPILKLI

801 PLAVLFGIFL YMGVTSLSGI QLYDRILLML KPPKYHPDVS YVTKVKSWM HIFTFSQILC LGLLWGVKSS PASLALPFIL

881 ILTVPLRRFL LPVIFTDIEL KCLDADDAEV TFDTEGQDV YDEVQMPV

Supporting Peptides:

| Peptide        | Uniq | -10lgP | Mass      | Length | ppm | m/z      | z | RT    | Fraction | Scan     | Source File               | Area F1 | Area F2 | Area F3 | Area F4 | Area F5 | Area F6 |
|----------------|------|--------|-----------|--------|-----|----------|---|-------|----------|----------|---------------------------|---------|---------|---------|---------|---------|---------|
| R.AISTMMSER.V  | Y    | 54.88  | 1024.4681 | 9      | 0.2 | 513.2415 | 2 | 31.14 | 7        | F7:8285  | 17112021_RID_2349_DP7.raw |         |         |         |         |         |         |
| K.GTVLLDLQER.S | Y    | 50.80  | 1142.6295 | 10     | 0.8 | 572.3225 | 2 | 45.59 | 7        | F7:13262 | 17112021_RID_2349_DP7.raw |         |         |         |         |         |         |
| R.NDSYLAEGR.Q  | Y    | 47.45  | 1023.4621 | 9      | 0.6 | 512.7386 | 2 | 26.44 | 7        | F7:6652  | 17112021_RID_2349_DP7.raw |         |         |         |         |         |         |

total 3 peptides

XP\_029143180.1  
[back to list](#)

[Protein Coverage](#) | [Supporting Peptides](#) |  
Protein Coverage:

1 MSLASGDSSS SPSEEEPRGT EPVKPLISHK ASHNSYVELH ELVMDKNNEF RWMEASHWIK LEEDFEEMGH WGRPHLSYLT

81 FQSLLEVRKA FNKGTVLLDLQERSLAGIAN QVLSQMTNEG KLKPDDQEV LRTLLLQHS PNESTSLNTL LPARVQQTDA

161 KDSTQPLLQE HHQIEMKTFF NGSEQGESSH SDFKKQLLDK IPSDAEATLG LVGCATFLDR PTLAFVRLKE AVELDSVLEV

241 PVPVRFLEFV LGPDSPHISY HEIGRAISTMMSERVFRNDSYLAEGRQDLI KSLDEFLDCC IVLPPSEIQN ERLLKMLLPV

321 QKDFLRKRYL PVEKKLEESL KDLGHKLKDH EVKAEDSDDS LRRTGRIFGG VVKDIKRRYP KYLSDIKDAL NPQCLAAVIF

401 IYFAALSPAI TFGGLLAEKT ERLIGVSELL LSTAVQSGFL CLLGAQPLLV VGFSGPLLVE EEAFTFCTK NNIEYIVGRV

481 WIGFWLILIV IVVAFEGSF LVRYISRYTQ EIFSILISLI FILETFFKLI KIFKEHPLKE VYTNITFSRD EEPGRGAPNT

561 ALLSLVLMGG TFFIAFFLRK FKNSSFFPGR LRRVIGDFGV PIAIFIMTLA DNLIKDTYTQ KLKVPKGLQV SNPEKRGWFI

641 YPTGIAFPIW MMFAAALPAL LVFILIFLET QITTLIVSKP ERKMLKSGSF HLDLLLIVGM GGIAPLLGMP WLSATTVRTV

721 THANALTVM KTTLPGEKAC IQEVKEQRTV GFLVAILVGL SILMEPILK IPLAVLFGIF LYMGVTSLSNG IQLYDRILLM

801 LKPPKYHPDI SYVTKVKTWR MHIFTLTQIL CLGLLWGVKS SPASLALPFI LILTVPLRRF LLPVIFRDIE LKCLDSDDAE

881 VTFDETEGQD VYDEVQMPI

Supporting Peptides:

| Peptide        | Uniq | -10lgP | Mass      | Length | ppm | m/z      | z | RT    | Fraction | Scan     | Source File               | Area F1 | Area F2 | Area F3 | Area F4 | Area F5 | Area F6 |
|----------------|------|--------|-----------|--------|-----|----------|---|-------|----------|----------|---------------------------|---------|---------|---------|---------|---------|---------|
| R.AISTMMSER.V  | Y    | 54.88  | 1024.4681 | 9      | 0.2 | 513.2415 | 2 | 31.14 | 7        | F7:8285  | 17112021_RID_2349_DP7.raw |         |         |         |         |         |         |
| K.GTVLLDLQER.S | Y    | 50.80  | 1142.6295 | 10     | 0.8 | 572.3225 | 2 | 45.59 | 7        | F7:13262 | 17112021_RID_2349_DP7.raw |         |         |         |         |         |         |
| R.NDSYLAEGR.Q  | Y    | 47.45  | 1023.4621 | 9      | 0.6 | 512.7386 | 2 | 26.44 | 7        | F7:6652  | 17112021_RID_2349_DP7.raw |         |         |         |         |         |         |

total 3 peptides

JAC95757.1  
[back to list](#)

[Protein Coverage](#) | [Supporting Peptides](#) |  
Protein Coverage:

1 MVSPRTCVRH LGSTLPLLLV LWDLHYEGVQ CGINAEVEKQ LELGKKLLAA GQLADALSHF HAAIEGDNDN YLAYYRRATV

81 YLAMGKSKAA IRDLRSRVEL KQDFTSARLQ RGHLLLKQK LDEAVEDFEG VLLSNPSDKE EGEARAQLLK SDEARRLC SQ

161 AQSAFLEKDY YTAITLLDKI LEVCVWDADM RELRAESYIK EGEPGKAISD LKAAAKLKSD NTEAFYKIST IYYELGDHEM

241 SLSEVRECLK LDQDHKECFH HYKRVKLNK HIVSAEELIQ EGRYQEATEK YEAVMKMETN VPVYTTRAKE RICHCFSKNQ

321 QTTEAIKVCT EVLQLEPENV NALKDRAEAY LLEEMYEEAI QDYETAKKYS DNDQQIQESL EK AQRMKLQS QKRDYKILG

401 VKRNARKQEI IKAYRKLAMQ WHPDNFQDEE EKKKAEEKFI DIAAAKEVLT DPEMRKRFDA GEDPLDAESQ QGGGHPFHRT

481 WNSWQGFDPF SSGGPFQFKF HFN

Supporting Peptides:

| Peptide            | Uniq | -10lgP | Mass      | Length | ppm | m/z      | z | RT    | Fraction | Scan    | Source File               | Area F1 | Area F2 | Area F3  | Area F  |
|--------------------|------|--------|-----------|--------|-----|----------|---|-------|----------|---------|---------------------------|---------|---------|----------|---------|
| K.YSDNDQQIQESLEK.A | Y    | 49.17  | 1695.7588 | 14     | 0.5 | 848.8871 | 2 | 35.45 | 3        | F3:9753 | 17112021_RID_2349_DP3.raw |         |         | 1.1168E5 |         |
| K.LKSDNTEAFYK.I    | N    | 47.39  | 1314.6455 | 11     | 1.2 | 658.3308 | 2 | 27.25 | 7        | F7:6950 | 17112021_RID_2349_DP7.raw |         |         |          |         |
| K.EVLTDPEMR.R      | N    | 42.20  | 1088.5172 | 9      | 0.9 | 545.2664 | 2 | 34.55 | 7        | F7:9479 | 17112021_RID_2349_DP7.raw |         |         |          |         |
| C.SQAQSAFLEK.D     | Y    | 41.16  | 1107.5560 | 10     | 0.3 | 554.7855 | 2 | 29.85 | 4        | F4:7720 | 17112021_RID_2349_DP4.raw |         |         |          | 8.8606E |

total 4 peptides

ADI47590.1  
[back to list](#)

[Protein Coverage](#) | [Supporting Peptides](#) |  
Protein Coverage:

|     |            |            |            |            |              |            |            |             |            |            |  |  |  |  |  |  |
|-----|------------|------------|------------|------------|--------------|------------|------------|-------------|------------|------------|--|--|--|--|--|--|
| 1   | MMQVLLATIC | LAVFPYQGSS | IILESGNVND | YEVVYPQKVT | ALPQGAIQQP   | EQKYEDTMQY | EIEVNGEPVV | LHLEKNKDLF  |            |            |  |  |  |  |  |  |
| 81  | SEDYSETHYS | PDGRKITTNP | PVQDHCYYHG | RIQNDAHSTA | SMSACNGLKG   | YFKLRGETYF | IEPLKIPDSE | AHAVYKYENL  |            |            |  |  |  |  |  |  |
| 161 | EKEDETPKIC | GV         | TQTNWESD   | EPIKKASQLV | ATSEQQRYVD   | RFRYVXXIVV | VDHRMCKKYN | GNLRRIRRRRL | YQLINFLNEM |            |  |  |  |  |  |  |
| 241 | YLPWNLRVPL | VGMEFWNQRD | LINVTSSPKV | TLDLFGEWRE | SDLLNRKEHD   | YAQLLTAIDF | DGPTIGMAHI | ATMCHSKLSV  |            |            |  |  |  |  |  |  |
| 321 | GIVEDYRPAE | SVVAAIMAHE | MGHNLGLIHD | ENQCNCDA   | DSCIMYHQINNP | PPMYFSNCSW | NYQNFLTNY  | KPDCTLIRPS  |            |            |  |  |  |  |  |  |
| 401 | R          | TDIVSPPVC  | GNALLEK    | GEE        | CDCGSPANCQ   | DPCCDAASCK | LHSWVECEIG | ECDDQCRFKP  | AGTECRAIRS | ECDLPEYCTG |  |  |  |  |  |  |
| 481 | QSVDCPIDRF | HRNGKPCQSN | NGYCYNGACP | IMQNQCYALF | GPDATVGQDA   | CFEENKKGKS | YFYCRKENDV | KIPCAPEDVK  |            |            |  |  |  |  |  |  |
| 561 | CGRLLCEIVK | NTCKYDYSED | PNYGMVDEGT | KCADGKVCRN | RHCVDVTTAY   |            |            |             |            |            |  |  |  |  |  |  |

Supporting Peptides:

| Peptide                      | Uniq | -10lgP | Mass      | Length | ppm | m/z      | z | RT    | Fraction | Scan     | Source File               | Area F1  | Area F2 | Area F3 | Area F |
|------------------------------|------|--------|-----------|--------|-----|----------|---|-------|----------|----------|---------------------------|----------|---------|---------|--------|
| R.TDIVSPPVC(+57.02)GNALLEK.G | Y    | 60.69  | 1711.8815 | 16     | 0.8 | 856.9487 | 2 | 49.01 | 1        | F1:14875 | 12112021_RID_2349_DP1.raw | 1.4223E6 | 4.9549  |         |        |
| V.TQTNWESDEPIKK.A            | N    | 44.98  | 1574.7576 | 13     | 0.5 | 788.3865 | 2 | 30.75 | 1        | F1:8710  | 12112021_RID_2349_DP1.raw | 3.3503E5 |         |         |        |

E0Y421.1  
[back to list](#)

[Protein Coverage](#) | [Supporting Peptides](#) |  
Protein Coverage:

|     |            |            |            |            |            |            |            |            |            |            |  |  |  |  |  |  |
|-----|------------|------------|------------|------------|------------|------------|------------|------------|------------|------------|--|--|--|--|--|--|
| 1   | MVLIRVLANL | LLLQLSYAQK | SSELVVGGDE | CNINEHRSLV | FLYNSSFGCG | GTLINQQWVL | SAAHCDMENV | QIYLGLHNLR |            |            |  |  |  |  |  |  |
| 81  | LRNQDEQIRV | AEEKFFCLSN | KSYTK      | WDKDI      | MLIRL      | NSSVT      | YNTHIAPLSL | PSSPFRVGSV | CRIMGWGAIT | SPNETFPNVP |  |  |  |  |  |  |
| 161 | HCANINILRY | SVCR       | AAYRGL     | PAQSR      | TLCAG      | ILQGGIGSCM | GDSGGPLICN | GEIQGIVSWG | DDICAQPHKP | VHYTKVFDYS |  |  |  |  |  |  |
| 241 | DWIQSIIAGN | TTATCPL    |            |            |            |            |            |            |            |            |  |  |  |  |  |  |

Supporting Peptides:

| Peptide               | Uniq | -10lgP | Mass      | Length | ppm  | m/z      | z | RT    | Fraction | Scan     | Source File               | Area F1  | Area F2 | Area F3 | Area F |
|-----------------------|------|--------|-----------|--------|------|----------|---|-------|----------|----------|---------------------------|----------|---------|---------|--------|
| K.WDKDIMLIR.L         | N    | 59.98  | 1188.6324 | 9      | 0.8  | 595.3240 | 2 | 47.61 | 2        | F2:13483 | 12112021_RID_2349_DP2.raw | 2.0105E7 | 1.37061 |         |        |
| R.AAYRGLPAQSR.T       | Y    | 57.92  | 1188.6364 | 11     | 0.5  | 397.2196 | 3 | 24.28 | 1        | F1:6637  | 12112021_RID_2349_DP1.raw | 1.8692E7 |         |         |        |
| K.WDKDIM(+15.99)LIR.L | N    | 54.14  | 1204.6274 | 9      | 0.6  | 603.3214 | 2 | 42.22 | 2        | F2:11819 | 12112021_RID_2349_DP2.raw | 1.4264E7 | 3.00851 |         |        |
| W.DKDIMLIR.L          | N    | 44.22  | 1002.5532 | 8      | -0.5 | 502.2836 | 2 | 37.38 | 3        | F3:10341 | 17112021_RID_2349_DP3.raw |          |         | 5.86161 |        |
| W.DKDIM(+15.99)LIR.L  | N    | 39.37  | 1018.5481 | 8      | 0.3  | 510.2815 | 2 | 31.54 | 3        | F3:8358  | 17112021_RID_2349_DP3.raw |          |         | 1.70971 |        |

total 5 pept

ADN04919.1  
[back to list](#)

[Protein Coverage](#) | [Supporting Peptides](#) |  
Protein Coverage:

|     |            |            |            |            |            |            |            |            |            |            |  |  |  |  |  |  |
|-----|------------|------------|------------|------------|------------|------------|------------|------------|------------|------------|--|--|--|--|--|--|
| 1   | MVLIRVLANL | LLLQLSYAQK | SSELVVGGDE | CNINEHRSLV | FLYNSSFGCG | GTLINQQWVL | SAAHCDMENV | QIYLGLHNLR |            |            |  |  |  |  |  |  |
| 81  | LRNQDEQIRV | AEEKFFCLSN | KSYTK      | WDKDI      | MLIRL      | NSSVT      | YNTHIAPLSL | PSSPFRVGSV | CRIMGWGAIT | SPNETFPNVP |  |  |  |  |  |  |
| 161 | HCANINILRY | SVCR       | AAYRGL     | PAQSR      | TLCAG      | ILQGGIGSCM | GDSGGPLICN | GEIQGIVSWG | DDICAQPHKP | VHYTKVFDYS |  |  |  |  |  |  |
| 241 | DWIQSIIAGN | TTATCPL    |            |            |            |            |            |            |            |            |  |  |  |  |  |  |

8/2/22, 12:12 PM

proteins

Supporting Peptides:

| Peptide               | Uniq | -10lgP | Mass      | Length | ppm  | m/z      | z | RT    | Fraction | Scan     | Source File               | Area F1  | Area F2 | Area F3 |
|-----------------------|------|--------|-----------|--------|------|----------|---|-------|----------|----------|---------------------------|----------|---------|---------|
| K.WDKDIMLIR.L         | N    | 59.98  | 1188.6324 | 9      | 0.8  | 595.3240 | 2 | 47.61 | 2        | F2:13483 | 12112021_RID_2349_DP2.raw | 2.0105E7 | 1.37061 |         |
| R.AAYRGLPAQSR.T       | Y    | 57.92  | 1188.6364 | 11     | 0.5  | 397.2196 | 3 | 24.28 | 1        | F1:6637  | 12112021_RID_2349_DP1.raw | 1.8692E7 |         |         |
| K.WDKDIM(+15.99)LIR.L | N    | 54.14  | 1204.6274 | 9      | 0.6  | 603.3214 | 2 | 42.22 | 2        | F2:11819 | 12112021_RID_2349_DP2.raw | 1.4264E7 | 3.00851 |         |
| W.DKDIMLIR.L          | N    | 44.22  | 1002.5532 | 8      | -0.5 | 502.2836 | 2 | 37.38 | 3        | F3:10341 | 17112021_RID_2349_DP3.raw |          | 5.86161 |         |
| W.DKDIM(+15.99)LIR.L  | N    | 39.37  | 1018.5481 | 8      | 0.3  | 510.2815 | 2 | 31.54 | 3        | F3:8358  | 17112021_RID_2349_DP3.raw |          | 1.70971 |         |
| total 5 peptides      |      |        |           |        |      |          |   |       |          |          |                           |          |         |         |

QBF53413.1

[back to list](#)

[Protein Coverage](#) | [Supporting Peptides](#) |

Protein Coverage:

1

MVLIRVLANL LVLQLSYAQK SSELVVGDE CNINEHRSLV FLYNSSFGCG GILINQEWVL SAAHCNMENV QIYLGGMHNL

81

PRNKDEQIRV AEEKFFCLSS KNYTKWDKDI MLIRLNSSVT YNTHIAPLSL PSSPPRVGSV CRIMGWGAIT SPNETFPNPV

161

HCANINILHY SVCR AAYRGL PAQSR TLCAG ILQGGIGSCM GDSGGPLICN GEIQGIVSWG DDICAQPHKP VHYTKVFDYS

241

DWIQSIIAGN TTATCPP

Supporting Peptides:

| Peptide               | Uniq | -10lgP | Mass      | Length | ppm  | m/z      | z | RT    | Fraction | Scan     | Source File               | Area F1  | Area F2   | Area F3 |
|-----------------------|------|--------|-----------|--------|------|----------|---|-------|----------|----------|---------------------------|----------|-----------|---------|
| K.WDKDIMLIR.L         | N    | 59.98  | 1188.6324 | 9      | 0.8  | 595.3240 | 2 | 47.61 | 2        | F2:13483 | 12112021_RID_2349_DP2.raw | 2.0105E7 | 1.37061E7 |         |
| R.AAYRGLPAQSR.T       | Y    | 57.92  | 1188.6364 | 11     | 0.5  | 397.2196 | 3 | 24.28 | 1        | F1:6637  | 12112021_RID_2349_DP1.raw | 1.8692E7 |           |         |
| K.WDKDIM(+15.99)LIR.L | N    | 54.14  | 1204.6274 | 9      | 0.6  | 603.3214 | 2 | 42.22 | 2        | F2:11819 | 12112021_RID_2349_DP2.raw | 1.4264E7 | 3.00851E7 |         |
| W.DKDIMLIR.L          | N    | 44.22  | 1002.5532 | 8      | -0.5 | 502.2836 | 2 | 37.38 | 3        | F3:10341 | 17112021_RID_2349_DP3.raw |          | 5.86161E7 |         |
| W.DKDIM(+15.99)LIR.L  | N    | 39.37  | 1018.5481 | 8      | 0.3  | 510.2815 | 2 | 31.54 | 3        | F3:8358  | 17112021_RID_2349_DP3.raw |          | 1.70971E7 |         |
| total 5 peptide       |      |        |           |        |      |          |   |       |          |          |                           |          |           |         |

XP\_007435739.1

back to list

[Protein Coverage](#) | [Supporting Peptides](#) |

Protein Coverage:

1

MIKSQRNASS TVRSFSSRSY TPGPVSSSRI STSYVSSGFG GSRYGSGGSF RGASAGSLGG ITAVSVNKS L LAPLNLEIDP

81

TIHQVKTEK EEIKTLNKF ANLIDKVRFL EQQNKMLETK WSLQNQKTT RSNMDSMF EA YISNLRRLQLE NLGQERARLD

161

AELANMQGLV EDFKNRYEDE INRTEKENE FVLLKKDVDE AYMNKVELES RLECLTDEIN FLRQLYDEEL RVLQSQISDT

241

SVILSMDNNR SLDLDGIIAE VRAQYEEIAN RSRSEAEKMY QIKYEELQTV AGKHGDDL RN TKNEINELNR MITRIQSEID

321

GLKGQRASLE AAITEAEERG ELAVKDANNK LAELEAALQR AKQDMARQLR EYQELMNVKL ALDIEIATYR KLEGEESRL

401

ESGMQNLSIQ TKTTGYSGGL SSGFSSYGGG YSSSYSSGGY SINALPLESS AISKTKAIVI KKIETRDGKL VSESSDVLSN

Supporting Peptides:

| Peptide         | Uniq | -10lgP | Mass      | Length | ppm | m/z      | z | RT    | Fraction | Scan     | Source File               | Area F1  | Area F2  | Area F3  | Area F4 |
|-----------------|------|--------|-----------|--------|-----|----------|---|-------|----------|----------|---------------------------|----------|----------|----------|---------|
| R.AQYEEIANR.S   | Y    | 73.65  | 1092.5199 | 9      | 0.5 | 547.2675 | 2 | 27.32 | 1        | F1:7637  | 12112021_RID_2349_DP1.raw | 6.6638E5 | 2.0438E5 | 3.7003E5 | 1.43    |
| K.LALDIEIATYR.K | N    | 59.31  | 1276.7026 | 11     | 1.2 | 639.3594 | 2 | 57.61 | 4        | F4:17049 | 17112021_RID_2349_DP4.raw |          |          |          | 0       |
| total 2 peptide |      |        |           |        |     |          |   |       |          |          |                           |          |          |          |         |

XP\_015672252.1

back to list

[Protein Coverage](#) | [Supporting Peptides](#) |

Protein Coverage:

|     |            |            |            |            |               |            |            |             |
|-----|------------|------------|------------|------------|---------------|------------|------------|-------------|
| 1   | MMRKNYRNTS | STVRSFSSRS | SGPVASSRIS | TSYSSAGSGF | GGSRYGGSAS    | FRGTSAGSLG | GITAVSVNKS | LLAPLNLEID  |
| 81  | PAIQQVRIKE | KEEIKTLNKK | FANLIDKVR  | LEQQNKMLET | KWSLLQNQKT    | TRSNMDSMFE | AYINNLRRL  | ENLGQERARL  |
| 161 | DAELGNMQGL | VEEFKNKYED | EINHRTEKEN | EFVLLKKD   | VD EAYMNKVELE | SRMECLTDEI | NFLRQFYDEE | LRVLQSQISD  |
| 241 | TSVILSMDNN | RSLDLGIIT  | DVK        | KAQYEEIA   | NRSRAEAERM    | YQIKYEELQT | VAGKHGDDL  | RSTKNEINELS |
| 321 | DGLKGQRASL | EEAITEAEER | GELAVKDANN | KLAELESAMQ | RAKQDMARQL    | REYQELLNTK | LALDIEIATY | RKLLGEGEIR  |
| 401 | LESGMQNLSI | QTKTTGYSGG | LSSGFSGYGG | GYNSSYSSGG | YSMNMLPMES    | SAISKTKAIV | IKKIETRDGK | LVSESSDVL   |
| 481 | K          |            |            |            |               |            |            |             |

Supporting Peptides:

| Peptide         | Uniq | -10lgP | Mass      | Length | ppm | m/z      | z | RT    | Fraction | Scan     | Source File               | Area F1  | Area F2  | Area F3  | Area F4 |
|-----------------|------|--------|-----------|--------|-----|----------|---|-------|----------|----------|---------------------------|----------|----------|----------|---------|
| K.AQYEEIANR.S   | Y    | 73.65  | 1092.5199 | 9      | 0.5 | 547.2675 | 2 | 27.32 | 1        | F1:7637  | 12112021_RID_2349_DP1.raw | 6.6638E5 | 2.0438E5 | 3.7003E5 | 1.43    |
| K.LALDIEIATYR.K | N    | 59.31  | 1276.7026 | 11     | 1.2 | 639.3594 | 2 | 57.61 | 4        | F4:17049 | 17112021_RID_2349_DP4.raw |          |          |          | 0       |
| total 2 peptide |      |        |           |        |     |          |   |       |          |          |                           |          |          |          |         |

JAG44290.1  
[back to list](#)

[Protein Coverage](#) | [Supporting Peptides](#) |

Protein Coverage:

|     |            |            |            |            |            |            |            |             |
|-----|------------|------------|------------|------------|------------|------------|------------|-------------|
| 1   | MMRKNYRNTS | NTVRTFSSRS | SGPIASSRIS | TSYSCSGFGG | GRYGSGASFR | GPSAGSLGGI | TAVSVNKSLL | APLNLEIDPA  |
| 81  | IQQVRTKEKE | EIKILNNKFA | NLIDKVRFL  | EQNKMLETKW | SLLQNQKTTR | SNMDSMFEAY | INTLRRQLEN | LGQERARLGA  |
| 161 | ELGNMQGLVE | EFKNKYEDEI | NHRTEKENEF | VLLKKDVDEA | YMNKVELES  | MECLTDEINF | LRQFYDEELR | VLQSQISDTS  |
| 241 | VILSMDNNRS | LDLDGIITDV | K          | KAQYEEIANR | SRAEAERMYQ | IKYEELQTV  | AGKHGDDLRC | TNEINELSRM  |
| 321 | LKGQRASLEA | AITEAEERGE | LAVKDANTKL | AELECAMQRA | KQDMARQLRE | YQELLNTKLA | LDIEIATYR  | KLLEGEERIRL |
| 401 | SGMQNLSIQT | KTGYSGGLS  | CGFSGYGGGY | NPSYSSGGYS | MNMLPMESSA | VSKTKAIVIK | KIETRDGKLV | SESSDVLNS   |

Supporting Peptides:

| Peptide         | Uniq | -10lgP | Mass      | Length | ppm | m/z      | z | RT    | Fraction | Scan     | Source File               | Area F1  | Area F2  | Area F3  | Area F4 |
|-----------------|------|--------|-----------|--------|-----|----------|---|-------|----------|----------|---------------------------|----------|----------|----------|---------|
| K.AQYEEIANR.S   | Y    | 73.65  | 1092.5199 | 9      | 0.5 | 547.2675 | 2 | 27.32 | 1        | F1:7637  | 12112021_RID_2349_DP1.raw | 6.6638E5 | 2.0438E5 | 3.7003E5 | 1.43    |
| K.LALDIEIATYR.K | N    | 59.31  | 1276.7026 | 11     | 1.2 | 639.3594 | 2 | 57.61 | 4        | F4:17049 | 17112021_RID_2349_DP4.raw |          |          |          | 0       |
| total 2 peptide |      |        |           |        |     |          |   |       |          |          |                           |          |          |          |         |

TRINITY\_DN6008  
[back to list](#)

[Protein Coverage](#) | [Supporting Peptides](#) |

Protein Coverage:

|     |            |            |            |            |            |            |            |             |
|-----|------------|------------|------------|------------|------------|------------|------------|-------------|
| 1   | MKNYRNTSST | VRSFSSRSYT | PGPVASSRIS | SSYSSSGFGG | GSRYGGGASF | RGASAGSLGG | ITAVSVNKS  | LAPLNLEIDP  |
| 81  | AMQQVRTKEK | EEIKTLNNKF | ANLIDKVRFL | EQNKMLETK  | WSLMQNQKT  | RSNMDSMFEA | YINTLRRQLD | NLGQERARLD  |
| 161 | AELANMQGLV | EEFKNKYEDE | INHRTEKENE | FVLLKKDVDE | AYMNKVELES | RMECMTDEVN | FLRQLYDEEL | RVLQSQISDT  |
| 241 | SVILSMDNNR | SLNLEGIIAD | V          | KAQYEEIAN  | RSRAEAERMY | QIKYEELQNV | AGKHGDDLRS | TKNEINELNR  |
| 321 | GLKGQRASLE | AAITEAEERG | ELAVKDANAK | LAELESAMQR | AKQDMARQLR | EYQELLNTKL | ALDIEIATYR | KLLEGEERIRL |
| 401 | ESGMQNLSIQ | TKTTGYSGGL | SSGFSGYGGG | YSSSYSGGGY | SINMLPMESS | AIGKTKAIVI | KKIETRDGKL | VSESSDVLNS  |

Supporting Peptides:

| Peptide         | Uniq | -10lgP | Mass      | Length | ppm | m/z      | z | RT    | Fraction | Scan     | Source File               | Area F1  | Area F2  | Area F3  | Area F4 |
|-----------------|------|--------|-----------|--------|-----|----------|---|-------|----------|----------|---------------------------|----------|----------|----------|---------|
| K.AQYEEIANR.S   | Y    | 73.65  | 1092.5199 | 9      | 0.5 | 547.2675 | 2 | 27.32 | 1        | F1:7637  | 12112021_RID_2349_DP1.raw | 6.6638E5 | 2.0438E5 | 3.7003E5 | 1.43    |
| K.LALDIEIATYR.K | N    | 59.31  | 1276.7026 | 11     | 1.2 | 639.3594 | 2 | 57.61 | 4        | F4:17049 | 17112021_RID_2349_DP4.raw |          |          |          | 0       |
| total 2 peptide |      |        |           |        |     |          |   |       |          |          |                           |          |          |          |         |

AFJ50411.1  
[back to list](#)

[Protein Coverage](#) | [Supporting Peptides](#) |

Protein Coverage:

|     |            |            |            |            |            |            |            |             |
|-----|------------|------------|------------|------------|------------|------------|------------|-------------|
| 1   | MMRKNYRNTS | NTVRTFSSRS | SGPIASSRIS | TSYSCSGFGG | GRYGSGASFR | GPSAGSLGGI | TAVSVNKSLL | APLNLEIDPA  |
| 81  | IQQVRTKEKE | EIKILNNKFA | NLIDKVRFL  | EQNKMLETKW | SLLQNQKTTR | SNMDSMFEAY | INTLRRQLEN | LGQERARLGA  |
| 161 | ELGNMQGLVE | EFKNKYEDEI | NHRTEKENEF | VLLKKDVDEA | YMNKVELES  | MECLTDEINF | LRQFYDEELR | VLQSQISDTS  |
| 241 | VILSMDNNRS | LDLDGIITDV | K          | KAQYEEIANR | SRAEAERMYQ | IKYEELQTV  | AGKHGDDLRC | TNEINELSRM  |
| 321 | LKGQRASLEA | AITEAEERGE | LAVKDANTKL | AELECAMQRA | KQDMARQLRE | YQELLNTKLA | LDIEIATYR  | KLLEGEERIRL |
| 401 | SGMQNLSIQT | KTGYSGGLS  | CGFSGYGGGY | NSSYSSGGYS | MNMLPMESSA | VSKTKAIVIK | KIETRDGKLV | SESSDVLNS   |

Supporting Peptides:

| Peptide         | Uniq | -10lgP | Mass      | Length | ppm | m/z      | z | RT    | Fraction | Scan     | Source File               | Area F1  | Area F2  | Area F3  | Area F4 |
|-----------------|------|--------|-----------|--------|-----|----------|---|-------|----------|----------|---------------------------|----------|----------|----------|---------|
| K.AQYEEIANR.S   | Y    | 73.65  | 1092.5199 | 9      | 0.5 | 547.2675 | 2 | 27.32 | 1        | F1:7637  | 12112021_RID_2349_DP1.raw | 6.6638E5 | 2.0438E5 | 3.7003E5 | 1.43    |
| K.LALDIEIATYR.K | N    | 59.31  | 1276.7026 | 11     | 1.2 | 639.3594 | 2 | 57.61 | 4        | F4:17049 | 17112021_RID_2349_DP4.raw |          |          |          | 0       |
| total 2 peptide |      |        |           |        |     |          |   |       |          |          |                           |          |          |          |         |

TRINITY\_DN2736  
[back to list](#)

| [Protein Coverage](#) | [Supporting Peptides](#) |

Protein Coverage:

|    |            |            |    |          |        |      |            |            |            |            |  |  |  |
|----|------------|------------|----|----------|--------|------|------------|------------|------------|------------|--|--|--|
| 1  | AASVTLDLFG | DWRDKNLLRR | KR | HDNAQLLT | GIDLNR | QTLG | IAHVEGMCNG | KLSVGVIQDY | CKSYLLVAIT | MAHEMGHNLG |  |  |  |
| 81 | MKHDNANCNC | PDTSCIMS   |    |          |        |      |            |            |            |            |  |  |  |

Supporting Peptides:

| Peptide            | Uniq -10lgP | Mass  | Length ppm | m/z | z   | RT       | Fraction | Scan  | Source File | Area F1                            | Area F2  | Area F3  | Area F4 |
|--------------------|-------------|-------|------------|-----|-----|----------|----------|-------|-------------|------------------------------------|----------|----------|---------|
| R.HDNAQLLTGIDLNR.Q | Y           | 77.18 | 1578.8114  | 14  | 0.9 | 790.4137 | 2        | 46.31 | 2           | F2:13153 12112021_RID_2349_DP2.raw | 1.8674E5 | 1.5439E6 | 7.1135E |
| D.NAQLLTGIDLNR.Q   | Y           | 51.88 | 1326.7256  | 12  | 1.0 | 664.3707 | 2        | 48.90 | 2           | F2:13982 12112021_RID_2349_DP2.raw |          | 1.8287E4 |         |
| total 2 peptides   |             |       |            |     |     |          |          |       |             |                                    |          |          |         |

TRINITY\_DN471  
[back to list](#)

| [Protein Coverage](#) | [Supporting Peptides](#) |

Protein Coverage:

|    |            |            |            |            |            |            |            |            |            |  |  |  |  |
|----|------------|------------|------------|------------|------------|------------|------------|------------|------------|--|--|--|--|
| 1  | MCQPLR     | SVAI       | VEDYSPIDRV | VAAIMAHEMG | HNLGITHDEN | PCSCGANSCI | MAPQISDPPP | MKFSDCSWDQ | YQNFLTNDKA |  |  |  |  |
| 81 | NCTLIRPSRT | DIVSPPACGN | ELLEVGEECD | CGSP       |            |            |            |            |            |  |  |  |  |

Supporting Peptides:

| Peptide           | Uniq -10lgP | Mass  | Length ppm | m/z | z   | RT       | Fraction | Scan  | Source File | Area F1                            | Area F2  | Area F3  | Area F4  |
|-------------------|-------------|-------|------------|-----|-----|----------|----------|-------|-------------|------------------------------------|----------|----------|----------|
| R.SVAIVEDYSPIDR.V | Y           | 83.77 | 1462.7303  | 13  | 0.2 | 732.3726 | 2        | 47.47 | 2           | F2:13537 12112021_RID_2349_DP2.raw | 4.0439E6 | 6.1514E6 | 1.3556E7 |
| total 1 peptides  |             |       |            |     |     |          |          |       |             |                                    |          |          |          |

TRINITY\_DN1497  
[back to list](#)

| [Protein Coverage](#) | [Supporting Peptides](#) |

Protein Coverage:

|     |            |            |              |               |            |             |               |               |  |  |  |  |  |
|-----|------------|------------|--------------|---------------|------------|-------------|---------------|---------------|--|--|--|--|--|
| 1   | MTDLEREMGL | PFIEQKLGLQ | IWTINNMKMD   | PIPAKAYGSF    | FEGDCYIVLN | NSKRQHSFAT  | DLHYWIGRTA    | TQDEQGAAAF    |  |  |  |  |  |
| 81  | YVTQMDDSLG | GRAIQHREVQ | GHEAFAFKSY   | FKKGIIYKKG    | GLASGFKHVE | TNMYNIKRL   | LHVKGKKHVT    | A TEVDLSWDSF  |  |  |  |  |  |
| 161 | NKGDVFLMDL | GKVLIQWNGP | FCNVAEKS     | KG MILARSIRDG | ERGGRAQIAI | IDNEKDCEP   | EL MQIMKATLGE | RTQEIREPLT    |  |  |  |  |  |
| 241 | DEKADEHQKA | NVRLYHVYEN | GKDLVVQEIA   | TRPLTQDLLS    | HEDCHIIDQG | GLKIYVWRGK  | ESSKEERKAA    | FTRAVGFIQA    |  |  |  |  |  |
| 321 | KGYPPSTNVE | VVNDGAESAM | FKQLFQKWTE   | KYTTQGLGKA    | YTLGKIAKVD | QAKFDITQLY  | VTPEVAAEER    | MPDDASGKVE    |  |  |  |  |  |
| 401 | VWRIENREMV | PVNPKTYGQF | YSGDCYLVLY   | TYTKSGRPHY    | IIYMWQGRHA | SVDEITACAF  | NAVELDKK      | YG DEPVQVRVTM |  |  |  |  |  |
| 481 | GKEPRHFLAI | FKGNLIIYEG | GISHGQKMGP   | EPAIQLFQVR    | GTDEFNTKTV | EVPARASSLN  | SNDVFILKTN    | QVCYLWCGKG    |  |  |  |  |  |
| 561 | CSGDEREMAK | TVADVISKWD | KQTILEGQEP   | AEFWVALGGK    | APYASDKRFQ | ERVPHYQSRL  | FECSNQTGRF    | IMTEIVDFGQ    |  |  |  |  |  |
| 641 | DDLDEEDVML | LDTWEEVFLW | VGKAANSYEK   | TESISAAKEY    | LKNHPAGR   | DA ATPIIMVK | QG HEPLNFTGWF | TAWDPYKWS     |  |  |  |  |  |
| 721 | EKSYEQMKSS | LGDVSAVSEI | TMDLKNANFN   | HRSTSNKPVT    | ANADISEARS | SMQDDQTFTN  | SSNCYNANTP    | CQEPNETGTF    |  |  |  |  |  |
| 801 | PRDLLINKTV | DELPDGVDP  | T KKEYYLSDAE | FCDIFGKTKD    | AFYQMPAWKQ | QNEKKQYGLF  |               |               |  |  |  |  |  |

Supporting Peptides:

| Peptide          | Uniq -10lgP | Mass  | Length ppm | m/z | z   | RT       | Fraction | Scan  | Source File | Area F1                            | Area F2  | Area F3 | Area F4 | Area F5 | Area F6 |
|------------------|-------------|-------|------------|-----|-----|----------|----------|-------|-------------|------------------------------------|----------|---------|---------|---------|---------|
| K.YGDEPVQVR.V    | Y           | 57.76 | 1061.5142  | 9   | 0.2 | 531.7645 | 2        | 29.19 | 1           | F1:8248 12112021_RID_2349_DP1.raw  | 4.705E4  |         |         |         |         |
| R.DAATPIIMVK.Q   | Y           | 48.71 | 1057.5841  | 10  | 0.8 | 529.7997 | 2        | 45.65 | 1           | F1:13790 12112021_RID_2349_DP1.raw | 8.7907E4 |         |         |         |         |
| total 2 peptides |             |       |            |     |     |          |          |       |             |                                    |          |         |         |         |         |

TRINITY\_DN1497  
[back to list](#)

| [Protein Coverage](#) | [Supporting Peptides](#) |

Protein Coverage:

|     |                    |                    |                    |            |            |             |             |                    |
|-----|--------------------|--------------------|--------------------|------------|------------|-------------|-------------|--------------------|
| 1   | MYNIKRLLVH         | KGKKHVTATE         | VDLSWDSFNK         | GDVFLMDLGG | VLIQWNGPFC | NVAEKSCKGMI | LARSIRDGER  | GGRAQIAIID         |
| 81  | NEKDCEPELMQ        | IMKATLGERT         | QEIREPLTDE         | KADEHQKANV | RLYHVYENGK | DLVVQEIATR  | PLTQDLLSHE  | DCHIIDQGGI         |
| 161 | KIYVWRGKES         | SKEERKAAFT         | RAVGFIQAKG         | YPPSTNVEVV | NDGAESAMFK | QLFQKWTEKY  | TTQGLGKAYT  | LGKIAKVDQA         |
| 241 | KFDITQLYVT         | PEVAAEERMP         | DDASGKVEVW         | RIENREMPV  | NPKTYGQFYS | GDCYLVLVLY  | TKSGRPHYII  | YMWQGRHASV         |
| 321 | DEITACAFNA         | VELDKK <b>YGDE</b> | <b>PVQVR</b> VTMGK | EPRHFLAIFK | GNLIIEGGI  | SHGQKMGPEP  | AIQLFQVRGT  | DEFNTKTVEV         |
| 401 | PARASSLNSN         | DVFILKTNQV         | CYLWCGKGCS         | GDEREMAKTV | ADVISKWDKQ | TILEGQEPAE  | FWVALGGKAP  | YASDKRFQER         |
| 481 | VPHYQSRLFE         | CSNQTGRFIM         | TEIVDFGQDD         | LDEEDVMLLD | TWEEVFLVWG | KAANSYEKTE  | SISAAKEYLK  | NHPAGR <b>DAAT</b> |
| 561 | <b>PIIMVK</b> QGHE | PLNFTGWFTA         | WDPYKWSDEK         | SYEQMKSSLG | DVSAVSEITM | DLKNANFNHR  | STSNKPV TAN | ADISEARSSM         |
| 641 | QDDQFTFTNS         | NCYNANTPCQ         | EPNETGTFFR         | DLINKTVD   | LPDGVDPTTK | EYYLSDAEFC  | DIFGKTKDAF  | YQMPAWKQQN         |
| 721 | EKKQYGLF           |                    |                    |            |            |             |             |                    |

Supporting Peptides:

| Peptide        | Uniq | -10lgP | Mass      | Length | ppm | m/z      | z | RT    | Fraction | Scan     | Source File               | Area F1  | Area F2 | Area F3 | Area F4 | Area F5 | A |
|----------------|------|--------|-----------|--------|-----|----------|---|-------|----------|----------|---------------------------|----------|---------|---------|---------|---------|---|
| K.YGDEPVQVR.V  | Y    | 57.76  | 1061.5142 | 9      | 0.2 | 531.7645 | 2 | 29.19 | 1        | F1:8248  | 12112021_RID_2349_DP1.raw | 4.705E4  |         |         |         |         |   |
| R.DAATPIIMVK.Q | Y    | 48.71  | 1057.5841 | 10     | 0.8 | 529.7997 | 2 | 45.65 | 1        | F1:13790 | 12112021_RID_2349_DP1.raw | 8.7907E4 |         |         |         |         |   |

total 2 peptides

ETE68218.1

[back to list](#)

| [Protein Coverage](#) | [Supporting Peptides](#) |

Protein Coverage:

|     |                    |            |                   |                      |            |            |            |                   |
|-----|--------------------|------------|-------------------|----------------------|------------|------------|------------|-------------------|
| 1   | MEVMNIIDQP         | IKVTEWQQTY | TYDSGIHSGM        | NTQVPSVSSK           | GLMDEDDLYG | KQYTFKTTY  | SQPGSGQTQT | QAELESQIAM        |
| 81  | TRAQRIRAA          | YPETAEDHTL | LLTTQVEGQQ        | TNVQRLAEP            | QMLKSAIVHL | INYQDDAELA | TRAIPELTKL | LNDEDPVVVS        |
| 161 | KAAMIVNQL          | SKEASRRALM | QSAQIVAAV         | <b>TMQNTS</b> DLDTAR | CTTSILH    | NLSHHREGLL | SIFKSGGIPA | LVRMLSSPVE        |
| 241 | SVLFYAITTL         | HNLLLYQEGA | KMAVRLADGL        | QKMVPLLTKN           | NPKFLAITTD | CLQLLAYGNQ | ESKLIILANG | GPQALVQIMR        |
| 321 | SYTYEKLLWT         | TSRVLKVLVS | CPSNKPAAVE        | AGGMQALGKH           | LTSSSPRLVQ | NCLWTLRNL  | DVATKQEGLD | GVLKILVNQL        |
| 401 | SSDDIHVLTC         | ATGTLNLT   | CNSKNKTLVT        | QSNQVEALIH           | TILRAGDKED | ITEPAVCALR | HLTSRHPAE  | MAQNSVR <b>LN</b> |
| 481 | <b>GIPAIVK</b> LLN | QPNQWPLIKA | TIGLIRNLAL        | CPANHAPLQE           | AAVIPRLVQL | LVKAHQDAQR | HAAAGTQQPY | TDGVKMEIIV        |
| 561 | EGCTGALHIL         | ARDPMNRMEI | FRLNTIPLFV        | QVRISWMEV            | LLYSPVENIQ | RVAAGVLCEL | AQDKEAADAI | DAEGASAPLM        |
| 641 | ELLHSRNEG          | ATYAAVLF   | <b>ISEDKNPDYR</b> | KRVSVELTNS           | LFKHDPAAWE | AAQSMIPIHE | PYADELDGGY | RGMYSGEIPM        |
| 721 | DFMDMHMDMD         | GDYPMDTYS  | DVRAPYPDHM        | LA                   |            |            |            |                   |

Supporting Peptides:

| Peptide          | Uniq | -10lgP | Mass      | Length | ppm | m/z      | z | RT    | Fraction | Scan     | Source File               | Area F1  | Area F2 | Area F3 | Area F4  |
|------------------|------|--------|-----------|--------|-----|----------|---|-------|----------|----------|---------------------------|----------|---------|---------|----------|
| R.LNYGIPAIVK.L   | Y    | 54.39  | 1086.6437 | 10     | 0.2 | 544.3292 | 2 | 49.42 | 6        | F6:14436 | 17112021_RID_2349_DP6.raw | 5.5682E4 |         |         | 1.1942E5 |
| R.TMQNTSDLDTAR.C | Y    | 50.31  | 1351.6038 | 12     | 0.9 | 676.8098 | 2 | 26.03 | 6        | F6:6391  | 17112021_RID_2349_DP6.raw |          |         |         |          |
| R.ISEDKNPDYR.K   | Y    | 46.51  | 1235.5781 | 10     | 1.3 | 618.7971 | 2 | 18.97 | 6        | F6:3975  | 17112021_RID_2349_DP6.raw |          |         |         |          |

total 3 peptides

XP\_025022318.1

[back to list](#)

| [Protein Coverage](#) | [Supporting Peptides](#) |

Protein Coverage:

|     |                    |                       |            |                   |               |            |            |                   |
|-----|--------------------|-----------------------|------------|-------------------|---------------|------------|------------|-------------------|
| 1   | MDVMNLIEQP         | IKVTEWQQTY            | TYDSGIHSGM | NTQVPSVSSK        | GLMDEDDLYG    | KQYTIKTTY  | YSQAGPGQAQ | AQAQAELESQ        |
| 81  | AMTRAQRIRA         | AMYPETVEDH            | SLLVTTQVEG | QQTNVQRLAE        | PSQMLKSAIV    | HLINYQDDAE | LATRAIPELT | KLNDEDPVV         |
| 161 | VSKAAMIVNQ         | LSKKEASRR             | LMQSAQIVAA | VVR <b>TMQNTS</b> | <b>LD</b> TAR | CTTSI      | LHNLSSHREG | LLSIFKSGGI        |
| 241 | VESVLFYAIT         | TLHNLLLYQE            | GAKMAVRLAD | GLQKMVPLLT        | KNNPKFLAIT    | TDCLQLLAYG | NQESKLIILA | NGGPQALVQI        |
| 321 | MRSYTYEKLL         | WTTSRVLKVL            | SVCPSNKP   | PAIVEAGGMQALG     | KHLTSSSPRL    | VQNCLWTLRN | LSDVATKQEG | LDGVLKILVN        |
| 401 | QLSSDDINVL         | TCATGTLSNL            | TCNNSKNKTL | VTQSNQVEAL        | IHTILRAGDK    | EDITEPAVCA | LRHLTSRHP  | AE <b>MAQNSVR</b> |
| 481 | <b>NYGIPAIVK</b> L | LNQPNQWPLI            | KATIGLIRNL | ALCPANHAPL        | QEA           | AAVIPRLV   | QLLVKAHQDA | QRHAAAGTQQ        |
| 561 | IVEGCTGALH         | ILARDPMNRM            | EIFRLNTIPL | FVQLLYSPVE        | NIQ           | RVAAGVL    | CELAQDKEAA | DAIDAEGASA        |
| 641 | EGTATYAAAV         | LFR <b>ISEDKNPDYR</b> | KRVSVELTNS | TNSLFKHDP         | AW            | EAAQSMIP   | IHEPYADELD | GGYRGMYPGE        |
| 721 | DMDGDYPMDT         | YSDGV                 | RAPYP      | DHMLA             |               |            |            |                   |

Supporting Peptides:

| Peptide | Uniq | -10lgP | Mass | Length | ppm | m/z | z | RT | Fraction | Scan | Source File | Area F1 | Area F2 | Area F3 | Area F4 |
|---------|------|--------|------|--------|-----|-----|---|----|----------|------|-------------|---------|---------|---------|---------|
|---------|------|--------|------|--------|-----|-----|---|----|----------|------|-------------|---------|---------|---------|---------|

| Peptide           | Uniq | -10lgP | Mass      | Length | ppm | m/z      | z | RT    | Fraction | Scan     | Source File               | Area F1  | Area F2 | Area F3 | Area F4  |
|-------------------|------|--------|-----------|--------|-----|----------|---|-------|----------|----------|---------------------------|----------|---------|---------|----------|
| R.LNYGIPAIVK.L    | Y    | 54.39  | 1086.6437 | 10     | 0.2 | 544.3292 | 2 | 49.42 | 6        | F6:14436 | 17112021_RID_2349_DP6.raw | 5.5682E4 |         |         | 1.1942E5 |
| R.TMQNTSDDLDTAR.C | Y    | 50.31  | 1351.6038 | 12     | 0.9 | 676.8098 | 2 | 26.03 | 6        | F6:6391  | 17112021_RID_2349_DP6.raw |          |         |         |          |
| R.ISEDKNPDYR.K    | Y    | 46.51  | 1235.5781 | 10     | 1.3 | 618.7971 | 2 | 18.97 | 6        | F6:3975  | 17112021_RID_2349_DP6.raw |          |         |         |          |

total 3 peptides

JAG67632.1  
[back to list](#)

[| Protein Coverage](#) | [Supporting Peptides](#) |  
Protein Coverage:

|     |                    |            |                    |            |                      |            |            |            |            |  |  |  |  |  |  |  |
|-----|--------------------|------------|--------------------|------------|----------------------|------------|------------|------------|------------|--|--|--|--|--|--|--|
| 1   | MDMMNIIDQP         | IKVTEWQQTY | TYDSGIHSGM         | NTQVPSVSSK | GLMDEDDLYG           | KQYTIKTTT  | YSQPGSGQGQ | TQAELESQLA |            |  |  |  |  |  |  |  |
| 81  | MTRAQRIRAA         | MYPETAEDHT | LLLTTQVEGQ         | QTNVQRLAEP | SQMLKSAIVH           | LINYQDDAEL | ATRAIPELTK | LLNDEDPVVV |            |  |  |  |  |  |  |  |
| 161 | SKAAMIVNQL         | SKKEASRRAL | MQSAQIVA           | AVR        | <b>TMQNTSDL DTAR</b> | CTTSIL     | HNLSHHREGL | LSIFKSGGIP | ALVRMLSSPV |  |  |  |  |  |  |  |
| 241 | ESVLFYAITT         | LHNLLLYQEG | AKMAVRLADG         | LQKMVPLLTK | NNPKFLAITT           | DCLQLLAYGN | QESKLIILAN | GGPQALVQIM |            |  |  |  |  |  |  |  |
| 321 | RSYTYEKLLW         | TTSRVLKVLS | VCPSNKPAIV         | EAGGMQALGK | HLTSSSPRLV           | QNCLWTLRNL | SDVATKQEG  | DGVLKILVNQ |            |  |  |  |  |  |  |  |
| 401 | LSSDDINVLT         | CATGTLSNLT | CNNSKNKTLV         | TQSNQVEALI | HTILRAGDKE           | DITEPAVCAL | RHLTSRHPEA | EMAQNSVR   | <b>LN</b>  |  |  |  |  |  |  |  |
| 481 | <b>YGIPAIVK</b> LL | NQPNQWPLIK | ATIGLIRNLA         | LCPANHAPLQ | EAAVIPRLVQ           | LLVKAHQDAQ | RHAAAGTQQP | YTDGVKMEEI |            |  |  |  |  |  |  |  |
| 561 | VEGCTGALHI         | LARDPMNRME | IFRLNTIPLF         | VQLLYSPVEN | IQRVAAGVLC           | ELAQDKEAAD | AIDAEGASAP | LMELLHSRNE |            |  |  |  |  |  |  |  |
| 641 | GTATYAAAVL         | FR         | <b>ISEDKNPD YR</b> | KRVSVELT   | NSLFKHDPAA           | WEAAQSMIPI | HEPYADELDG | GYRGMYSGEI | PIDPMDLHMD |  |  |  |  |  |  |  |
| 721 | MDGDYPMDTY         | SDGVRAPYPD | HMLA               |            |                      |            |            |            |            |  |  |  |  |  |  |  |

Supporting Peptides:

| Peptide           | Uniq | -10lgP | Mass      | Length | ppm | m/z      | z | RT    | Fraction | Scan     | Source File               | Area F1  | Area F2 | Area F3 | Area F4  |
|-------------------|------|--------|-----------|--------|-----|----------|---|-------|----------|----------|---------------------------|----------|---------|---------|----------|
| R.LNYGIPAIVK.L    | Y    | 54.39  | 1086.6437 | 10     | 0.2 | 544.3292 | 2 | 49.42 | 6        | F6:14436 | 17112021_RID_2349_DP6.raw | 5.5682E4 |         |         | 1.1942E5 |
| R.TMQNTSDDLDTAR.C | Y    | 50.31  | 1351.6038 | 12     | 0.9 | 676.8098 | 2 | 26.03 | 6        | F6:6391  | 17112021_RID_2349_DP6.raw |          |         |         |          |
| R.ISEDKNPDYR.K    | Y    | 46.51  | 1235.5781 | 10     | 1.3 | 618.7971 | 2 | 18.97 | 6        | F6:3975  | 17112021_RID_2349_DP6.raw |          |         |         |          |

total 3 peptides

JAG44306.1  
[back to list](#)

[| Protein Coverage](#) | [Supporting Peptides](#) |  
Protein Coverage:

|     |                    |            |                    |            |                      |            |            |            |            |  |  |  |  |  |  |  |
|-----|--------------------|------------|--------------------|------------|----------------------|------------|------------|------------|------------|--|--|--|--|--|--|--|
| 1   | MEVMNIIDQP         | IKVTEWQQTY | TYDSGIHSGM         | NTQVPSVSSK | GLMDEDDLYG           | KQYTIKTTT  | YSQPGSGQAQ | TQAELESQLA |            |  |  |  |  |  |  |  |
| 81  | MTRAQRIRAA         | MYPETAEDHT | LLLTTQVEGQ         | QTNVQRLAEP | SQMLKSAIVH           | LINYQDDAEL | ATRAIPELTK | LLNDEDPVVV |            |  |  |  |  |  |  |  |
| 161 | SKAAMIVNQL         | SKKEASRRAL | MQSAQIVA           | AVR        | <b>TMQNTSDL DTAR</b> | CTTSIL     | HNLSHHREGL | LSIFKSGGIP | ALVRMLSSPV |  |  |  |  |  |  |  |
| 241 | ESVLFYAITT         | LHNLLLYQEG | AKMAVRLADG         | LQKMVPLLTK | NNPKFLAITT           | DCLQLLAYGN | QESKLIILAN | GGPQALVQIM |            |  |  |  |  |  |  |  |
| 321 | RSYTYEKLLW         | TTSRVLKVLS | VCPSNKPAIV         | EAGGMQALGK | HLTSSSPRLV           | QNCLWTLRNL | SDVATKQEG  | DGVLKILVNQ |            |  |  |  |  |  |  |  |
| 401 | LSSDDINVLT         | CATGTLSNLT | CNNSKNKTLV         | TQSNQVEALI | HTILRAGDKE           | DITEPAVCAL | RHLTSRHPEA | EMAQNSVR   | <b>LN</b>  |  |  |  |  |  |  |  |
| 481 | <b>YGIPAIVK</b> LL | NQPNQWPLIK | ATIGLIRNLA         | LCPANHAPLQ | EAAVIPRLVQ           | LLVKAHQDAQ | RHAAAGTQQP | YTDGVKMEEI |            |  |  |  |  |  |  |  |
| 561 | VEGCTGALHI         | LARDPMNRME | IFRLNTIPLF         | VQLLYSPVEN | IQRVAAGVLC           | ELAQDKEAAD | AIDAEGASAP | LMELLHSRNE |            |  |  |  |  |  |  |  |
| 641 | GTATYAAAVL         | FR         | <b>ISEDKNPD YR</b> | KRVSVELT   | NSLFKHDPAA           | WEAAQSMIPI | HEPYADELDA | GYRGMYSAEI | PMDPMDMHL  |  |  |  |  |  |  |  |
| 721 | MDGDYPMDTY         | SDGVRAPYPD | HMLA               |            |                      |            |            |            |            |  |  |  |  |  |  |  |

Supporting Peptides:

| Peptide           | Uniq | -10lgP | Mass      | Length | ppm | m/z      | z | RT    | Fraction | Scan     | Source File               | Area F1  | Area F2 | Area F3 | Area F4  |
|-------------------|------|--------|-----------|--------|-----|----------|---|-------|----------|----------|---------------------------|----------|---------|---------|----------|
| R.LNYGIPAIVK.L    | Y    | 54.39  | 1086.6437 | 10     | 0.2 | 544.3292 | 2 | 49.42 | 6        | F6:14436 | 17112021_RID_2349_DP6.raw | 5.5682E4 |         |         | 1.1942E5 |
| R.TMQNTSDDLDTAR.C | Y    | 50.31  | 1351.6038 | 12     | 0.9 | 676.8098 | 2 | 26.03 | 6        | F6:6391  | 17112021_RID_2349_DP6.raw |          |         |         |          |
| R.ISEDKNPDYR.K    | Y    | 46.51  | 1235.5781 | 10     | 1.3 | 618.7971 | 2 | 18.97 | 6        | F6:3975  | 17112021_RID_2349_DP6.raw |          |         |         |          |

total 3 peptides

JAA96758.1  
[back to list](#)

[| Protein Coverage](#) | [Supporting Peptides](#) |  
Protein Coverage:

1 MEVMNIIDQP IKVTEWQQTY TYDSGIHSGM NTQVPSVSSK GLMDEDDLYG KQYTIKTTT YSQPGSGQAQ TQAELESQLA

81 MTRAQRIRAA MYPETAEDHT LLLTTQVEGQ QTNVQRLAEP SQMLKSAIVH LINYQDDAEL ATRAIPELTK LLNDEDPVVV

161 SKAAMIVNQL SKKEASRRAL MQSAQIVAAV VR**TMQNTSDL DTAR**CTTSIL HNLSSHREGL LSIFKSGGIP ALVRMLSSPV

241 ESVLFYAITT LHNLLLYQEG AKMAVRLADG LQKMVPLLTk NNPkFLAITT DCLQLLAYGN QESKLIILAN GGPQALVQIM

321 RSYTYEKLLW TTSRVLKVLs VCPSNKPAIV EAGGMQALGK HLTSSSPRLV QNCLWTLRNL SDVATKQEGl DGVLKILVNQ

401 LSSDDINVLT CATGTLsNLT CNNSKNKTLV TQsNGVEALi HTILRAGDKE DITEPAVCAL RHLTSRHPEA EMAQNSVR**LN**

481 **YGIPAIVK**LL NQPNQWPLIK ATIGLIRNLA LCPANHAPLQ EAAVIPRLVQ LLVKAHQDAQ RHAAAGTQQP YTDGVKMEEI

561 VEGCTGALHI LARDPMNRME IFRlNTIPLF VQLLYSPVEN IQRVAAGVLC ELAQDKEAAD AIDAEGASAP LMELLHSRNE

641 GTATYAAAVL FR**ISEDKNPD YR**KRVsVELT NSLFKHDPAA WEAAQSMIPI HEPYADELDA GYRGMysAEI PMDPMDMHLd

721 MDGDYPMDTY SDGVRAPYPD HMLA

Supporting Peptides:

| Peptide           | Uniq | -10lgP | Mass      | Length | ppm | m/z      | z | RT    | Fraction | Scan     | Source File               | Area F1  | Area F2 | Area F3 | Area F4  |
|-------------------|------|--------|-----------|--------|-----|----------|---|-------|----------|----------|---------------------------|----------|---------|---------|----------|
| R.LNYGIPAIVK.L    | Y    | 54.39  | 1086.6437 | 10     | 0.2 | 544.3292 | 2 | 49.42 | 6        | F6:14436 | 17112021_RID_2349_DP6.raw | 5.5682E4 |         |         | 1.1942E5 |
| R.TMQNTSDDLDTAR.C | Y    | 50.31  | 1351.6038 | 12     | 0.9 | 676.8098 | 2 | 26.03 | 6        | F6:6391  | 17112021_RID_2349_DP6.raw |          |         |         |          |
| R.ISEDKNPDYR.K    | Y    | 46.51  | 1235.5781 | 10     | 1.3 | 618.7971 | 2 | 18.97 | 6        | F6:3975  | 17112021_RID_2349_DP6.raw |          |         |         |          |

total 3 peptides

JAG46538.1

[back to list](#)

| [Protein Coverage](#) | [Supporting Peptides](#) |

Protein Coverage:

1 MEVMNIIDQP IKVTEWQQTY TYDSGIHSGM NTQVPSVSSK GLMDEDDLYG KQYTIKTTT YSQPGSGQAQ TQAELESQLA

81 MTRAQRIRAA MYPETAEDHT LLLTTQVEGQ QTNVQRLAEP SQMLKSAIVH LINYQDDAEL ATRAIPELTK LLNDEDPVVV

161 SKAAMIVNQL SKKEASRRAL MQSAQIVAAV VR**TMQNTSDL DTAR**CTTSIL HNLSSHREGL LSIFKSGGIP ALVRMLSSPV

241 ESVLFYAITT LHNLLLYQEG AKMAVRLADG LQKMVPLLTk NNPkFLAITT DCLQLLAYGN QESKLIILAN GGPQALVQIM

321 RSYTYEKLLW TTSRVLKVLs VCPSNKPAIV EAGGMQALGK HLTSSSPRLV QNCLWTLRNL SDVATKQEGl DGVLKILVNQ

401 LSSDDINVLT CATGTLsNLT CNNSKNKTLV TQsNGVEALi HTILRAGDKE DITEPAVCAL RHLTSRHPEA EMAQNSVR**LN**

481 **YGIPAIVK**LL NQPNQWPLIK ATIGLIRNLA LCPANHAPLQ EAAVIPRLVQ LLVKAHQDAQ RHAAAGTQQP YTDGVKMEEI

561 VEGCTGALHI LARDPMNRME IFRlNTIPLF VQLLYSPVEN IQRVAAGVLC ELAQDKEAAD AIDAEGASAP LMELLHSRNE

641 GTATYAAAVL FR**ISEDKNPD YR**KRVsVELT NSLFKHDPAA WEAAQSMIPI HEPYADELDA GYRGMysAEI PMDPMDMHLd

721 MDGDYPMDTY SDGVRAPYPD HMLA

Supporting Peptides:

| Peptide           | Uniq | -10lgP | Mass      | Length | ppm | m/z      | z | RT    | Fraction | Scan     | Source File               | Area F1  | Area F2 | Area F3 | Area F4  |
|-------------------|------|--------|-----------|--------|-----|----------|---|-------|----------|----------|---------------------------|----------|---------|---------|----------|
| R.LNYGIPAIVK.L    | Y    | 54.39  | 1086.6437 | 10     | 0.2 | 544.3292 | 2 | 49.42 | 6        | F6:14436 | 17112021_RID_2349_DP6.raw | 5.5682E4 |         |         | 1.1942E5 |
| R.TMQNTSDDLDTAR.C | Y    | 50.31  | 1351.6038 | 12     | 0.9 | 676.8098 | 2 | 26.03 | 6        | F6:6391  | 17112021_RID_2349_DP6.raw |          |         |         |          |
| R.ISEDKNPDYR.K    | Y    | 46.51  | 1235.5781 | 10     | 1.3 | 618.7971 | 2 | 18.97 | 6        | F6:3975  | 17112021_RID_2349_DP6.raw |          |         |         |          |

total 3 peptides

LAB43566.1

[back to list](#)

| [Protein Coverage](#) | [Supporting Peptides](#) |

Protein Coverage:

1 STWGERGGVE RGNQGGGDGA GRIAMEVVNI IDQPIKVTEW QQTYTYDSGI HSGMNTQVPS VSSKGLMDED DLYGNQYTIK

81 KTTTYSQPGS GKAQTQAELE SQLAMTRAQR IRAAMYpETT EDHsLLVTTQ VEGQQTNVQR LAEPsQMLKS AIVHLINyQD

161 DAELATRAIP ELTKLLNDED PVVVsKAAMI VNQLsKKEAS RRALMQSAQI VAAVVR**TMQN TSDLDTAR**CT TSILHNLSSH

241 REGLLSIFKS GGIPALVRML SSPVESVLfY AITTLHNLlL YQEGAKMAVR LADGLQKMVP LLTKNNPKFL AITTDCLQLL

321 AYGNQESKLI ILANGGPQAL VQIMRSYTYE KLLWTTsRVL KVLsVCPSNK PAIVEAGGMQ ALGKHLTSSs PRLVQNCltW

401 LRNLSDVATK QEGlDGVLKI LVNQLSSDDI HVLTCATGTL sNLTcNNsKN KTLVTQsNGV EALiHTILRA GDkEDITEPA

481 VCALRHlLTSR HPEAEMAQNS VR**LNYGIPAI VK**LLNQNPNQW PLIKATIGLI RNlALCPANH APLQEAAVIP RlVQLLVKAH

561 AAAGTQQPYT DGvKMEEIvE GCTGALHILA RDPMNRMElF RLNTIPLfVQ LLYSPVENIq RVAAGVLCEl AQDKEAADAI

641 DAEGASAPLM ELLHSRNEGT ATYAAAVLFR **ISEDKNPDYR**KRVsVELTNS LFKHDPAAWE AAQSMIPIHE PYADElDGGY

721 RGMysGEIPM DPMDMHMDMD GDYPMDTYsD GVRAPYPDHM LA

Supporting Peptides:

| Peptide           | Uniq | -10lgP | Mass      | Length | ppm | m/z      | z | RT    | Fraction | Scan     | Source File               | Area F1  | Area F2 | Area F3 | Area F4  |
|-------------------|------|--------|-----------|--------|-----|----------|---|-------|----------|----------|---------------------------|----------|---------|---------|----------|
| R.LNYGIPAIVK.L    | Y    | 54.39  | 1086.6437 | 10     | 0.2 | 544.3292 | 2 | 49.42 | 6        | F6:14436 | 17112021_RID_2349_DP6.raw | 5.5682E4 |         |         | 1.1942E5 |
| R.TMQNTSDLD TAR.C | Y    | 50.31  | 1351.6038 | 12     | 0.9 | 676.8098 | 2 | 26.03 | 6        | F6:6391  | 17112021_RID_2349_DP6.raw |          |         |         |          |
| R.ISEDKNPDYR.K    | Y    | 46.51  | 1235.5781 | 10     | 1.3 | 618.7971 | 2 | 18.97 | 6        | F6:3975  | 17112021_RID_2349_DP6.raw |          |         |         |          |

total 3 peptides

JAV50234.1

[back to list](#)

| [Protein Coverage](#) | [Supporting Peptides](#) |

Protein Coverage:

|     |                 |              |                 |            |                 |             |            |             |            |            |  |  |  |  |  |  |
|-----|-----------------|--------------|-----------------|------------|-----------------|-------------|------------|-------------|------------|------------|--|--|--|--|--|--|
| 1   | MEVMNIIDQP      | IKVTEWQQTY   | TYDSGIHSGM      | NTQVPSVSSK | GLMDEDDLYG      | KQYTIKTTT   | YSQPGSGQAQ | TQAELESQLA  |            |            |  |  |  |  |  |  |
| 81  | MTRAQRIRAA      | MYPETAEDHT   | LLLTQVEGQ       | QTNVQRLAEP | SQMLKSAIVH      | LINYQDDAEL  | ATRAIPELTK | LNDEDPVVV   |            |            |  |  |  |  |  |  |
| 161 | SKAAMIVNQL      | SKKEASRRAL   | MQSAQIVA        | AVR        | <b>TMQNTSDL</b> | <b>DTAR</b> | CTTSIL     | HNLSSHREGL  | LSIFKSGGIP | ALVRMLSSPV |  |  |  |  |  |  |
| 241 | ESVLFYAITT      | LHNLLLYQEG   | AKMAVRLADG      | LQKMVPLLT  | KNPKFLAITT      | DCLQLLAYGN  | QESKLIILAN | GGPQALVQIM  |            |            |  |  |  |  |  |  |
| 321 | RSYTYEKLLW      | TTSRVLKVLS   | VCPSNKPAIV      | EAGGMQALGK | HLTSSSPRLV      | QNCLWTLRNL  | SDVATKQEG  | LDGVLKILVNQ |            |            |  |  |  |  |  |  |
| 401 | LSSDDINVLT      | CATGTLSNLT   | CNNSKNKTLV      | TQSNQVEALI | HTILRAGDKE      | DITEPAVCAL  | RHLTSRHPEA | EMAQNSVR    | <b>LN</b>  |            |  |  |  |  |  |  |
| 481 | <b>YGIPAIVK</b> | LLNQPNQWPLIK | ATIGLIRNLA      | LCPANHAPLQ | EAAVIPRLVQ      | LLVKAHQDAQ  | RHAAAGTQQP | YTDGVKMEEI  |            |            |  |  |  |  |  |  |
| 561 | VEGCTGALHI      | LARDPMNRLE   | IFRLNTIPLF      | VQLLYSPVEN | IQRVAAGVLC      | ELAQDKEAAD  | AIDAEGASAP | LMELLHSRNE  |            |            |  |  |  |  |  |  |
| 641 | GTATYAAAVL      | FR           | <b>ISEDKNPD</b> | YRKRVSVELT | NSLFKHDPAA      | WEAAQSMIPI  | HEPYADELDA | GYRAMYSAEI  | PMDALDMDGD |            |  |  |  |  |  |  |
| 721 | YFMDTYS         | SDGVR        | RAPYPDHMLA      |            |                 |             |            |             |            |            |  |  |  |  |  |  |

Supporting Peptides:

| Peptide           | Uniq | -10lgP | Mass      | Length | ppm | m/z      | z | RT    | Fraction | Scan     | Source File               | Area F1  | Area F2 | Area F3 | Area F4  |
|-------------------|------|--------|-----------|--------|-----|----------|---|-------|----------|----------|---------------------------|----------|---------|---------|----------|
| R.LNYGIPAIVK.L    | Y    | 54.39  | 1086.6437 | 10     | 0.2 | 544.3292 | 2 | 49.42 | 6        | F6:14436 | 17112021_RID_2349_DP6.raw | 5.5682E4 |         |         | 1.1942E5 |
| R.TMQNTSDLD TAR.C | Y    | 50.31  | 1351.6038 | 12     | 0.9 | 676.8098 | 2 | 26.03 | 6        | F6:6391  | 17112021_RID_2349_DP6.raw |          |         |         |          |
| R.ISEDKNPDYR.K    | Y    | 46.51  | 1235.5781 | 10     | 1.3 | 618.7971 | 2 | 18.97 | 6        | F6:3975  | 17112021_RID_2349_DP6.raw |          |         |         |          |

total 3 peptides

XP\_026576301.1

[back to list](#)

| [Protein Coverage](#) | [Supporting Peptides](#) |

Protein Coverage:

|     |                |               |                  |             |                  |            |             |             |            |            |  |  |  |  |  |  |
|-----|----------------|---------------|------------------|-------------|------------------|------------|-------------|-------------|------------|------------|--|--|--|--|--|--|
| 1   | MEVMNIIDQP     | IKVTEWQQTY    | TYDSGIHSGM       | NTQVPSVSSK  | GLMDEDDLYG       | KQYTIKTTT  | YSQPGSGQAQ  | TQELESQLAM  |            |            |  |  |  |  |  |  |
| 81  | TRAQRIRAA      | YPETAEDHTL    | LLTTQVEGQQ       | TNVQRLAEP   | SQMLKSAIVHL      | INQDDAELA  | TRAIPELTKL  | LNDEDPVVVS  |            |            |  |  |  |  |  |  |
| 161 | KAAMIVNQLS     | KKEASRRALM    | QSAQIVA          | AAV         | <b>TMQNTSDDL</b> | <b>TAR</b> | CTTSILH     | NLSHHREGLL  | SIFKSGGIPA | LVRMLSSPVE |  |  |  |  |  |  |
| 241 | SVLFYAITTL     | HNLLLYQEGA    | KMAVRLADGL       | QKMVPLLT    | KNPKFLAITTD      | CLQLLAYGNQ | ESKLIILANG  | GPQALVQIMR  |            |            |  |  |  |  |  |  |
| 321 | SYTYEKLLWT     | TSRVLKVLSV    | CPSNKPAIVE       | AGGMQALGKH  | LTSSSPRLVQ       | NCLWTLRNL  | DVATKQEGLD  | GVLKILVNQL  |            |            |  |  |  |  |  |  |
| 401 | SSDDIHVLT      | CATGTLSNLTC   | NNSKNKTLVT       | TQSNQVEALIH | TILRAGDKED       | ITEPAVCALR | HLSRHPEAE   | MAQNSVR     | <b>LN</b>  |            |  |  |  |  |  |  |
| 481 | <b>GIPAIVK</b> | LLNQPNQWPLIKA | TIGLIRNLAL       | CPANHAPLQE  | AAVIPRLVQL       | LVKAHQDAQ  | RHAAAGTQQPY | YTDGVKMEEIV |            |            |  |  |  |  |  |  |
| 561 | EGCTGALHIL     | ARDPMNRMEI    | FRNTIPLFV        | QLLYSPVENI  | QRVAAGVLC        | LAQDKEAADA | IDAEGASAPL  | MELLHSRNEG  |            |            |  |  |  |  |  |  |
| 641 | TATYAAAVLF     | R             | <b>ISEDKNPDY</b> | RKRVSVELTN  | SLFKHDPAAW       | EAAQSMIPIH | EPYADELDGG  | YRGMYSGEIP  | MDAMDMDGDY |            |  |  |  |  |  |  |
| 721 | FMDTYS         | SDGVR         | APYPDHMLA        |             |                  |            |             |             |            |            |  |  |  |  |  |  |

Supporting Peptides:

| Peptide           | Uniq | -10lgP | Mass      | Length | ppm | m/z      | z | RT    | Fraction | Scan     | Source File               | Area F1  | Area F2 | Area F3 | Area F4  |
|-------------------|------|--------|-----------|--------|-----|----------|---|-------|----------|----------|---------------------------|----------|---------|---------|----------|
| R.LNYGIPAIVK.L    | Y    | 54.39  | 1086.6437 | 10     | 0.2 | 544.3292 | 2 | 49.42 | 6        | F6:14436 | 17112021_RID_2349_DP6.raw | 5.5682E4 |         |         | 1.1942E5 |
| R.TMQNTSDLD TAR.C | Y    | 50.31  | 1351.6038 | 12     | 0.9 | 676.8098 | 2 | 26.03 | 6        | F6:6391  | 17112021_RID_2349_DP6.raw |          |         |         |          |
| R.ISEDKNPDYR.K    | Y    | 46.51  | 1235.5781 | 10     | 1.3 | 618.7971 | 2 | 18.97 | 6        | F6:3975  | 17112021_RID_2349_DP6.raw |          |         |         |          |

total 3 peptides

XP\_026525656.1

[back to list](#)

| [Protein Coverage](#) | [Supporting Peptides](#) |

Protein Coverage:

1 MEVMNIIDQP IKVTEWQQTY TYDSGIHSGM NTQVPSVSSK GLMDEDDLYG KQYTIKTTT YSQPGSGQAQ TQAELESQAM

81 TRAQRIRAA YPETAEDHTL LLTTQVEGQQ TNVQRLAEPS QMLKSAIVHL INYQDDAELA TRAIPELTKL LNDEDPVVVS

161 KAAMIVNQLS KKEASRRALM QSAQIVAAV **RTMQNTSDLD TAR**CTTSILH NLSHHREGLL SIFKSGGIPA LVRMLSSPVE

241 SVLFYAITTL HNLLLYQEGA KMAVRLADGL QKMVPLLTKN NPKFLAITTD CLQLLAYGNQ ESKLIILANG GPQALVQIMR

321 SYTYEKLLWT TSRVLKVLVS CPSNKPAIVE AGGMQALGKH LTSSSPRLVQ NCLWTLRNL SIVATKQEGLD GVLKILVNQL

401 SSDDIHVLTC ATGTLSNLT C NNSKNKTLVT QSNNGVEALH TILRAGDKED ITEPAVCALR HLTSRHEPEE **MAQNSVR LNY**

481 **GIPAIVK**LLN QPNQWPLIKA TIGLIRNLAL CPANHAPLQE AAVIPRLVQL LVKAHQDAQR HAAAGTQQPY TDGVKMEEIV

561 EGCTGALHIL ARDPMNRMEI FRLNTIPLFV QLLYSPVENI QRVAAGVLCE LAQDKEAADA IDAEGASAPL MELLHSRNEG

641 TATYAAAVLF **RISEDKNPDY** RKRVSVELTN SLFKHDPAAW EAAQSMIPIH EPYADELDGG YRGMYSGEIP MDAMDMDGDY

721 PMDTYSDGVR APYPDHMLA

Supporting Peptides:

| Peptide           | Uniq | -10lgP | Mass      | Length | ppm | m/z      | z | RT    | Fraction | Scan     | Source File               | Area F1  | Area F2 | Area F3 | Area F4  |
|-------------------|------|--------|-----------|--------|-----|----------|---|-------|----------|----------|---------------------------|----------|---------|---------|----------|
| R.LNYGIPAIVK.L    | Y    | 54.39  | 1086.6437 | 10     | 0.2 | 544.3292 | 2 | 49.42 | 6        | F6:14436 | 17112021_RID_2349_DP6.raw | 5.5682E4 |         |         | 1.1942E5 |
| R.TMQNTSDLD TAR.C | Y    | 50.31  | 1351.6038 | 12     | 0.9 | 676.8098 | 2 | 26.03 | 6        | F6:6391  | 17112021_RID_2349_DP6.raw |          |         |         |          |
| R.ISEDKNPDYR.K    | Y    | 46.51  | 1235.5781 | 10     | 1.3 | 618.7971 | 2 | 18.97 | 6        | F6:3975  | 17112021_RID_2349_DP6.raw |          |         |         |          |

total 3 peptides

XP\_026576299.1  
[back to list](#)

| [Protein Coverage](#) | [Supporting Peptides](#) |

Protein Coverage:

1 MEVMNIIDQP IKVTEWQQTY TYDSGIHSGM NTQVPSVSSK GLMDEDDLYG KQYTIKTTT YSQPGSGQAQ TQAELESQAM

81 MTRAQRIRAA MYPETAEDHT LLLTTQVEGQ QTNVQRLAEP SQMLKSAIVH LINYQDDAEL ATRAIPELTK LLNDEDPVVV

161 SKAAMIVNQL SKKEASRRAL MQSAQIVAAB **VRTMQNTSDL DTAR**CTTSIL HNLSHHREGL LSIFKSGGIP ALVRMLSSPV

241 ESVLFYAITT LHNLLLYQEG AKMAVRLADG LQKMVPLLTK NNPKFLAITT DCLQLLAYGN QESKLIILAN GGPQALVQIM

321 RSYTYEKLLW TTSRVLKVLVS VCPSNKPAIV EAGGMQALGK HLTSSSPRLV QNCLWTLRNL SDVATKQEGD DGVLKILVNQ

401 LSSDDIHVLT CATGTLSNLT CNNSKNKTLV TQSNNGVEALI HTILRAGDKE DITEPAVCAL RHLSRHEPEE **EMAQNSVR LN**

481 **YGIPAIVK**LL NQPNQWPLIK ATIGLIRNLA LCPANHAPLQ EAAVIPRLVQ LLVKAHQDAQ RHAAAGTQQP YTDGVKMEEI

561 VEGCTGALHI LARDPMNRME IFRNTIPLF VQLLYSPVEN IQRVAAGVLC ELAQDKEAAD AIDAEGASAP LMELLHSRNE

641 GTATYAAAVL **FRISEDKNPD YR**KRVSVELT NSLFKHDPAA WEAAQSMIPI HEPYADELDG GYRGMYSGEI PMDAMDMDGD

721 YPMDTYSDGV RAPYPDHMLA

Supporting Peptides:

| Peptide           | Uniq | -10lgP | Mass      | Length | ppm | m/z      | z | RT    | Fraction | Scan     | Source File               | Area F1  | Area F2 | Area F3 | Area F4  |
|-------------------|------|--------|-----------|--------|-----|----------|---|-------|----------|----------|---------------------------|----------|---------|---------|----------|
| R.LNYGIPAIVK.L    | Y    | 54.39  | 1086.6437 | 10     | 0.2 | 544.3292 | 2 | 49.42 | 6        | F6:14436 | 17112021_RID_2349_DP6.raw | 5.5682E4 |         |         | 1.1942E5 |
| R.TMQNTSDLD TAR.C | Y    | 50.31  | 1351.6038 | 12     | 0.9 | 676.8098 | 2 | 26.03 | 6        | F6:6391  | 17112021_RID_2349_DP6.raw |          |         |         |          |
| R.ISEDKNPDYR.K    | Y    | 46.51  | 1235.5781 | 10     | 1.3 | 618.7971 | 2 | 18.97 | 6        | F6:3975  | 17112021_RID_2349_DP6.raw |          |         |         |          |

total 3 peptides

XP\_026525655.1  
[back to list](#)

| [Protein Coverage](#) | [Supporting Peptides](#) |

Protein Coverage:

1 MEVMNIIDQP IKVTEWQQTY TYDSGIHSGM NTQVPSVSSK GLMDEDDLYG KQYTIKTTT YSQPGSGQAQ TQAELESQAM

81 MTRAQRIRAA MYPETAEDHT LLLTTQVEGQ QTNVQRLAEP SQMLKSAIVH LINYQDDAEL ATRAIPELTK LLNDEDPVVV

161 SKAAMIVNQL SKKEASRRAL MQSAQIVAAB **VRTMQNTSDL DTAR**CTTSIL HNLSHHREGL LSIFKSGGIP ALVRMLSSPV

241 ESVLFYAITT LHNLLLYQEG AKMAVRLADG LQKMVPLLTK NNPKFLAITT DCLQLLAYGN QESKLIILAN GGPQALVQIM

321 RSYTYEKLLW TTSRVLKVLVS VCPSNKPAIV EAGGMQALGK HLTSSSPRLV QNCLWTLRNL SDVATKQEGD DGVLKILVNQ

401 LSSDDIHVLT CATGTLSNLT CNNSKNKTLV TQSNNGVEALI HTILRAGDKE DITEPAVCAL RHLSRHEPEE **EMAQNSVR LN**

481 **YGIPAIVK**LL NQPNQWPLIK ATIGLIRNLA LCPANHAPLQ EAAVIPRLVQ LLVKAHQDAQ RHAAAGTQQP YTDGVKMEEI

561 VEGCTGALHI LARDPMNRME IFRNTIPLF VQLLYSPVEN IQRVAAGVLC ELAQDKEAAD AIDAEGASAP LMELLHSRNE

641 GTATYAAAVL **FRISEDKNPD YR**KRVSVELT NSLFKHDPAA WEAAQSMIPI HEPYADELDG GYRGMYSGEI PMDAMDMDGD

721 YPMDTYSDGV RAPYPDHMLA

Supporting Peptides:

| Peptide           | Uniq | -10lgP | Mass      | Length | ppm | m/z      | z | RT    | Fraction | Scan     | Source File               | Area F1  | Area F2 | Area F3 | Area F4  |
|-------------------|------|--------|-----------|--------|-----|----------|---|-------|----------|----------|---------------------------|----------|---------|---------|----------|
| R.LNYGIPAIVK.L    | Y    | 54.39  | 1086.6437 | 10     | 0.2 | 544.3292 | 2 | 49.42 | 6        | F6:14436 | 17112021_RID_2349_DP6.raw | 5.5682E4 |         |         | 1.1942E5 |
| R.TMQNTSDDLDTAR.C | Y    | 50.31  | 1351.6038 | 12     | 0.9 | 676.8098 | 2 | 26.03 | 6        | F6:6391  | 17112021_RID_2349_DP6.raw |          |         |         |          |
| R.ISEDKNPDYR.K    | Y    | 46.51  | 1235.5781 | 10     | 1.3 | 618.7971 | 2 | 18.97 | 6        | F6:3975  | 17112021_RID_2349_DP6.raw |          |         |         |          |

total 3 peptides

XP\_026525654.1  
[back to list](#)

[Protein Coverage](#) | [Supporting Peptides](#) |  
Protein Coverage:

|     |                    |            |                    |            |                      |            |            |            |            |  |  |  |  |  |  |  |
|-----|--------------------|------------|--------------------|------------|----------------------|------------|------------|------------|------------|--|--|--|--|--|--|--|
| 1   | MEVMNIIDQP         | IKVTEWQQTY | TYDSGIHSGM         | NTQVPSVSSK | GLMDEDDLYG           | KQYTIKTTT  | YSQPGSGQAQ | TQAELESQLA |            |  |  |  |  |  |  |  |
| 81  | MTRAQRIRAA         | MYPETAEDHT | LLLTTQVEGQ         | QTNVQRLAEP | SQMLKSAIVH           | LINYQDDAEL | ATRAIPELTK | LLNDEDPVVV |            |  |  |  |  |  |  |  |
| 161 | SKAAMIVNQL         | SKKEASRRAL | MQSAQIVA           | AVR        | <b>TMQNTSDL DTAR</b> | CTTSIL     | HNLSHHREGL | LSIFKSGGIP | ALVRMLSSPV |  |  |  |  |  |  |  |
| 241 | ESVLFYAITT         | LHNLLLYQEG | AKMAVRLADG         | LQKMVPLLTK | NNPKFLAITT           | DCLQLLAYGN | QESKLIILAN | GGPQALVQIM |            |  |  |  |  |  |  |  |
| 321 | RSYTYEKLLW         | TTSRVLKVL  | VCPSNKPAIV         | EAGGMQALGK | HLTSSSPRLV           | QNCLWTLRNL | SDVATKQEG  | DGVLKILVNQ |            |  |  |  |  |  |  |  |
| 401 | LSSDDIHVLT         | CATGTLSNLT | CNNSKNKTLV         | TQSNQVEALI | HTILRAGDKE           | DITEPAVCAL | RHLTSRHPEA | EMAQNSVR   | <b>LN</b>  |  |  |  |  |  |  |  |
| 481 | <b>YGIPAIVK</b> LL | NQPNQWPLIK | ATIGLIRNLA         | LCPANHAPLQ | EAAVIPRLVQ           | LLVKAHQDAQ | RHAAAGTQQP | YTDGVKMEEI |            |  |  |  |  |  |  |  |
| 561 | VEGCTGALHI         | LARDPMNRME | IFRLNTIPLF         | VQLLYSPVEN | IQRVAAGVLC           | ELAQDKEAAD | AIDAEGASAP | LMELLHSRNE |            |  |  |  |  |  |  |  |
| 641 | GTATYAAAVL         | FR         | <b>ISEDKNPD YR</b> | KRVSVELT   | NSLFKHDPAA           | WEAAQSMIPI | HEPYADELDG | GYRGMYSGEI | PMDAMDMDGD |  |  |  |  |  |  |  |
| 721 | YPMDTYS            | DGVR       | APYDPHMLA          |            |                      |            |            |            |            |  |  |  |  |  |  |  |

Supporting Peptides:

| Peptide           | Uniq | -10lgP | Mass      | Length | ppm | m/z      | z | RT    | Fraction | Scan     | Source File               | Area F1  | Area F2 | Area F3 | Area F4  |
|-------------------|------|--------|-----------|--------|-----|----------|---|-------|----------|----------|---------------------------|----------|---------|---------|----------|
| R.LNYGIPAIVK.L    | Y    | 54.39  | 1086.6437 | 10     | 0.2 | 544.3292 | 2 | 49.42 | 6        | F6:14436 | 17112021_RID_2349_DP6.raw | 5.5682E4 |         |         | 1.1942E5 |
| R.TMQNTSDDLDTAR.C | Y    | 50.31  | 1351.6038 | 12     | 0.9 | 676.8098 | 2 | 26.03 | 6        | F6:6391  | 17112021_RID_2349_DP6.raw |          |         |         |          |
| R.ISEDKNPDYR.K    | Y    | 46.51  | 1235.5781 | 10     | 1.3 | 618.7971 | 2 | 18.97 | 6        | F6:3975  | 17112021_RID_2349_DP6.raw |          |         |         |          |

total 3 peptides

XP\_026576298.1  
[back to list](#)

[Protein Coverage](#) | [Supporting Peptides](#) |  
Protein Coverage:

|     |                    |            |                    |            |                      |            |            |            |            |  |  |  |  |  |  |  |
|-----|--------------------|------------|--------------------|------------|----------------------|------------|------------|------------|------------|--|--|--|--|--|--|--|
| 1   | MEVMNIIDQP         | IKVTEWQQTY | TYDSGIHSGM         | NTQVPSVSSK | GLMDEDDLYG           | KQYTIKTTT  | YSQPGSGQAQ | TQAELESQLA |            |  |  |  |  |  |  |  |
| 81  | MTRAQRIRAA         | MYPETAEDHT | LLLTTQVEGQ         | QTNVQRLAEP | SQMLKSAIVH           | LINYQDDAEL | ATRAIPELTK | LLNDEDPVVV |            |  |  |  |  |  |  |  |
| 161 | SKAAMIVNQL         | SKKEASRRAL | MQSAQIVA           | AVR        | <b>TMQNTSDL DTAR</b> | CTTSIL     | HNLSHHREGL | LSIFKSGGIP | ALVRMLSSPV |  |  |  |  |  |  |  |
| 241 | ESVLFYAITT         | LHNLLLYQEG | AKMAVRLADG         | LQKMVPLLTK | NNPKFLAITT           | DCLQLLAYGN | QESKLIILAN | GGPQALVQIM |            |  |  |  |  |  |  |  |
| 321 | RSYTYEKLLW         | TTSRVLKVL  | VCPSNKPAIV         | EAGGMQALGK | HLTSSSPRLV           | QNCLWTLRNL | SDVATKQEG  | DGVLKILVNQ |            |  |  |  |  |  |  |  |
| 401 | LSSDDIHVLT         | CATGTLSNLT | CNNSKNKTLV         | TQSNQVEALI | HTILRAGDKE           | DITEPAVCAL | RHLTSRHPEA | EMAQNSVR   | <b>LN</b>  |  |  |  |  |  |  |  |
| 481 | <b>YGIPAIVK</b> LL | NQPNQWPLIK | ATIGLIRNLA         | LCPANHAPLQ | EAAVIPRLVQ           | LLVKAHQDAQ | RHAAAGTQQP | YTDGVKMEEI |            |  |  |  |  |  |  |  |
| 561 | VEGCTGALHI         | LARDPMNRME | IFRLNTIPLF         | VQLLYSPVEN | IQRVAAGVLC           | ELAQDKEAAD | AIDAEGASAP | LMELLHSRNE |            |  |  |  |  |  |  |  |
| 641 | GTATYAAAVL         | FR         | <b>ISEDKNPD YR</b> | KRVSVELT   | NSLFKHDPAA           | WEAAQSMIPI | HEPYADELDG | GYRGMYSGEI | PMDAMDMDGD |  |  |  |  |  |  |  |
| 721 | YPMDTYS            | DGVR       | APYDPHMLA          |            |                      |            |            |            |            |  |  |  |  |  |  |  |

Supporting Peptides:

| Peptide           | Uniq | -10lgP | Mass      | Length | ppm | m/z      | z | RT    | Fraction | Scan     | Source File               | Area F1  | Area F2 | Area F3 | Area F4  |
|-------------------|------|--------|-----------|--------|-----|----------|---|-------|----------|----------|---------------------------|----------|---------|---------|----------|
| R.LNYGIPAIVK.L    | Y    | 54.39  | 1086.6437 | 10     | 0.2 | 544.3292 | 2 | 49.42 | 6        | F6:14436 | 17112021_RID_2349_DP6.raw | 5.5682E4 |         |         | 1.1942E5 |
| R.TMQNTSDDLDTAR.C | Y    | 50.31  | 1351.6038 | 12     | 0.9 | 676.8098 | 2 | 26.03 | 6        | F6:6391  | 17112021_RID_2349_DP6.raw |          |         |         |          |
| R.ISEDKNPDYR.K    | Y    | 46.51  | 1235.5781 | 10     | 1.3 | 618.7971 | 2 | 18.97 | 6        | F6:3975  | 17112021_RID_2349_DP6.raw |          |         |         |          |

total 3 peptides

XP\_013919280.1  
[back to list](#)

[Protein Coverage](#) | [Supporting Peptides](#) |  
Protein Coverage:

1MDMMNIIDQP IKVTEWQQTY TYDSGIHSGM NTQVPSVSSK GLMDEDDLYG KQYTIKKT TT YSQPGSGQAQ TQAELESQIA

81MTRAQRIRAA MYPETAEDHT LLLTTQVEGQ QTNVQRLAEP SQMLKSAIVH LINYQDDAEL ATRAIPELTK LLNDEDPVVV

161SKAAMIVNQL SKKEASRRAL MQSAQIVAAV **VR****TMQNTSDLD****DTAR**CTTSIL HNLSSHREGL LSIFKSGGIP ALVRMLSSPV

241ESVLFYAITT LHNLLLYQEG AKMAVRLADG LQKMVPLLTN NNPKFLAITT DCLQLLAYGN QESKLIILAN GGPQALVQIM

321RSYTYEKLLW TTSRVLKVLS VCPSNKPAIV EAGGMQALGK HLTSSSPRLV QNCLWTLRNL SDVATKQEGD DGVLKILVNQ

401LSSDDINVLT CATGTLSNLT CNNSKNKTLV TQSNQVEALI HTILRAGDKE DITEPAVCAL RHLTSRHEPA EMAQNSVR**LN**

481**YGIPAIVK**LL NQPNQWPLIK ATIGLIRNLA LCPANHAPLQ EAAVIPRLVQ LLVKAHQDAQ RHAAAGTQQP YTDGVKMEEI

561VEGCTGALHI LARDPMNRME IFRNTIPLF VQLLYSPVEN IQRVAAGVLC ELAQDKEAAD AIDAEGASAP LMELLHSRNE

641GTATYAAAVL **FR****ISEDKNPD****YR**KRVSVELT NSLFKHDPAA WEAAQSMIPI HEPYADELDG GYRAMYSGEI PMDHMDMHMD

721MDGDYPMDTY SDGVRAPYPD HMLA

Supporting Peptides:

| Peptide           | Uniq | -10lgP | Mass      | Length | ppm | m/z      | z | RT    | Fraction | Scan     | Source File               | Area F1  | Area F2 | Area F3 | Area F4  |
|-------------------|------|--------|-----------|--------|-----|----------|---|-------|----------|----------|---------------------------|----------|---------|---------|----------|
| R.LNYGIPAIVK.L    | Y    | 54.39  | 1086.6437 | 10     | 0.2 | 544.3292 | 2 | 49.42 | 6        | F6:14436 | 17112021_RID_2349_DP6.raw | 5.5682E4 |         |         | 1.1942E5 |
| R.TMQNTSDLD TAR.C | Y    | 50.31  | 1351.6038 | 12     | 0.9 | 676.8098 | 2 | 26.03 | 6        | F6:6391  | 17112021_RID_2349_DP6.raw |          |         |         |          |
| R.ISEDKNPDYR.K    | Y    | 46.51  | 1235.5781 | 10     | 1.3 | 618.7971 | 2 | 18.97 | 6        | F6:3975  | 17112021_RID_2349_DP6.raw |          |         |         |          |

total 3 peptides

TRINITY\_DN206  
[back to list](#)

[Protein Coverage](#) | [Supporting Peptides](#) |  
Protein Coverage:

1PLFAGTSHLE RGGVERGKQG GGDGAGRIAM DMMNIIDQPI KVTEWQQTYT YDSGIHSGMN TQVPSVSSKG LMDDEDDLYGK

81QYTIKKT TTYT SQPGSGQAQS QAELESQLAM TRAQRIRAAM YPETAEDHTL LLTTQVEGQQ TNVQRLAEPS QMLKSAIVHL

161INYQDDAELA TRAIPELTKL LNDEDPVVVS KAAMIVNQLS KKEASRRALM QSAQIVAAV **R****TMQNTSDLD****TAR**CTTSILH

241NLSSHREGLL SIFKSGGIPA LVRMLSSPVE SVLFYAITTL HNLLLYQEGA KMAVRLADGL QKMVPLLTKN NPKFLAITTD

321CLQLLAYGNQ ESKLIILANG GPQALVQIMR SYTYEKLLWT TSRVLKVLSV CPSNKPAIVE AGGMQALGKH LTSSSPRLVQ

401NCLWTLRNL S DVATKQEGLD GVLKILVNQL SSDDINVLT C ATGTLSNLT C NNSKNKTLVT QSNQVEALIH TILRAGDKED

481ITEPAVCALR HLTSRHEPAE MAQNSVR**LN****Y GIPAIVK****LLN** QPNQWPLIKA TIGLIRNLAL CPANHVPLQE AAVIPRLVQL

561LVKAHQDAQR HAAAGTQQPY TDGVKMEEIV EGCTGALHIL ARDPMNRMEI FRLNTIPLFV QLLYSPVENI QRVAAGVLC E

641LAQDKEAADA IDAEGASAPL MELLHSRNEG TATYAAAVLF **R****ISEDKNPDY****R**KRVSVELTN SLFKHDPAAW EAAQSMIPIH

721EPYADDVDAG YRGMYSGEIP MDPMDMHLDM DGDYPMDTYS DGVRAPYPGH MLA

Supporting Peptides:

| Peptide           | Uniq | -10lgP | Mass      | Length | ppm | m/z      | z | RT    | Fraction | Scan     | Source File               | Area F1  | Area F2 | Area F3 | Area F4  |
|-------------------|------|--------|-----------|--------|-----|----------|---|-------|----------|----------|---------------------------|----------|---------|---------|----------|
| R.LNYGIPAIVK.L    | Y    | 54.39  | 1086.6437 | 10     | 0.2 | 544.3292 | 2 | 49.42 | 6        | F6:14436 | 17112021_RID_2349_DP6.raw | 5.5682E4 |         |         | 1.1942E5 |
| R.TMQNTSDLD TAR.C | Y    | 50.31  | 1351.6038 | 12     | 0.9 | 676.8098 | 2 | 26.03 | 6        | F6:6391  | 17112021_RID_2349_DP6.raw |          |         |         |          |
| R.ISEDKNPDYR.K    | Y    | 46.51  | 1235.5781 | 10     | 1.3 | 618.7971 | 2 | 18.97 | 6        | F6:3975  | 17112021_RID_2349_DP6.raw |          |         |         |          |

total 3 peptides

TRINITY\_DN206  
[back to list](#)

[Protein Coverage](#) | [Supporting Peptides](#) |  
Protein Coverage:

1PLFAGTSHLE RGGVERGKQG GGDGAGRIAM DMMNIIDQPI KVTEWQQTYT YDSGIHSGMN TQVPSVSSKG LMDDEDDLYGK

81QYTIKKT TTYT SQPGSGQAQS QAELESQLAM TRAQRIRAAM YPETAEDHTL LLTTQVEGQQ TNVQRLAEPS QMLKSAIVHL

161INYQDDAELA TRAIPELTKL LNDEDPVVVS KAAMIVNQLS KKEASRRALM QSAQIVAAV **R****TMQNTSDLD****TAR**CTTSILH

241NLSSHREGLL SIFKSGGIPA LVRMLSSPVE SVLFYAITTL HNLLLYQEGA KMAVRLADGL QKMVPLLTKN NPKFLAITTD

321CLQLLAYGNQ ESKLIILANG GPQALVQIMR SYTYEKLLWT TSRVLKVLSV CPSNKPAIVE AGGMQALGKH LTSSSPRLVQ

401NCLWTLRNL S DVATKQEGLD GVLKILVNQL SSDDINVLT C ATGTLSNLT C NNSKNKTLVT QSNQVEALIH TILRAGDKED

481ITEPAVCALR HLTSRHEPAE MAQNSVR**LN****Y GIPAIVK****LLN** QPNQWPLIKA TIGLIRNLAL CPANHVPLQE AAVIPRLVQL

561LVKAHQDAQR HAAAGTQQPY TDGVKMEEIV EGCTGALHIL ARDPMNRMEI FRLNTIPLFV QLLYSPVENI QRVAAGVLC E

641LAQDKEAADA IDAEGASAPL MELLHSRNEG TATYAAAVLF **R****ISEDKNPDY****R**KRVSVELTN SLFKHDPAAW EAAQSMIPIH

721EPYADDVDAG YRGMYSGEIP MDPMDMHLDM DGDYPMDTYS DGVRAPYPGH MLA

Supporting Peptides:

| Peptide          | Uniq | -10lgP | Mass      | Length | ppm | m/z      | z | RT    | Fraction | Scan     | Source File               | Area F1  | Area F2 | Area F3 | Area F4  |
|------------------|------|--------|-----------|--------|-----|----------|---|-------|----------|----------|---------------------------|----------|---------|---------|----------|
| R.LNYGIPAIVK.L   | Y    | 54.39  | 1086.6437 | 10     | 0.2 | 544.3292 | 2 | 49.42 | 6        | F6:14436 | 17112021_RID_2349_DP6.raw | 5.5682E4 |         |         | 1.1942E5 |
| R.TMQNTSDLDтар.C | Y    | 50.31  | 1351.6038 | 12     | 0.9 | 676.8098 | 2 | 26.03 | 6        | F6:6391  | 17112021_RID_2349_DP6.raw |          |         |         |          |
| R.ISEDKNPDYR.K   | Y    | 46.51  | 1235.5781 | 10     | 1.3 | 618.7971 | 2 | 18.97 | 6        | F6:3975  | 17112021_RID_2349_DP6.raw |          |         |         |          |

total 3 peptides

XP\_032091066.1  
[back to list](#)

[Protein Coverage](#) | [Supporting Peptides](#) |  
Protein Coverage:

|     |                    |            |            |            |                    |                    |                    |                    |
|-----|--------------------|------------|------------|------------|--------------------|--------------------|--------------------|--------------------|
| 1   | MGTRDGLCQA         | RCSPPLFAES | SHLERGGVER | SNQGGGDGAS | RIAMDMMNII         | DQPIKVTEWQ         | QTYTYDSGIH         | SGMNTQVPSV         |
| 81  | SSKGLMDEDD         | LYGKQYTIKK | TTTYSQPGSG | QAQTQAELES | QLAMTRAQRI         | RAAMYPETAE         | DHTLLLTQV          | EGQQTNVQRL         |
| 161 | AEPSQMLKSA         | IVHLINYQDD | AELATRAIPE | LTKLLNDEDP | VVVSKAAMIV         | NQLSKKDASR         | RALMQSAQIV         | AAVVR <b>TMQNT</b> |
| 241 | <b>SDLDтар</b> CTT | SILHNLSHHR | EGLLSIFKSG | GIPALVRMLS | SPVESVLFYA         | ITTLHNLLLY         | QEGAKMAVRL         | ADGLQKMVPL         |
| 321 | LTKNNPKFLA         | ITTDCLQLLA | YGNQESKLII | LANGGPQALV | QIMRSYTYEK         | LLWTTSRVLK         | VLSVCPSNKP         | AIVEAGGMQA         |
| 401 | LGKHLTSSSP         | RLVQNCLWTL | RNLSDVATKQ | EGLDGVLKIL | VNQLSSDDIN         | VLTCATGTLS         | NLTCNNSKNK         | TLVTQSNGVE         |
| 481 | ALIHTILRAG         | DKEDITEPAV | CALRHLSRHR | PEAEMAQNSV | <b>R.LNYGIPAIV</b> | <b>KLLNQPNQWP</b>  | LIKATIGLIR         | NLALCPANHA         |
| 561 | PLQEAIVIPR         | LVQLLVKAHQ | DAQRHAAAGT | QQPYTDGVKM | EEIVEGCTGA         | LHILARDPMN         | RMEIFRLNTI         | PLFVQLLYSP         |
| 641 | VENIQRVAAG         | VLCELAQDKE | AADAIDAEGA | SAPLMELLHS | RNEGATATYAA        | AVLFR <b>ISEDK</b> | <b>NPDYR</b> KRVSV | ELTNSLFKHD         |
| 721 | PAAWEAAQSM         | IPIHEPYADE | LDGGYRAMYS | GEIPMDHMDM | HMDMDGDYPM         | DTYSDGVRAP         | YPDHMLA            |                    |

Supporting Peptides:

| Peptide          | Uniq | -10lgP | Mass      | Length | ppm | m/z      | z | RT    | Fraction | Scan     | Source File               | Area F1  | Area F2 | Area F3 | Area F4  |
|------------------|------|--------|-----------|--------|-----|----------|---|-------|----------|----------|---------------------------|----------|---------|---------|----------|
| R.LNYGIPAIVK.L   | Y    | 54.39  | 1086.6437 | 10     | 0.2 | 544.3292 | 2 | 49.42 | 6        | F6:14436 | 17112021_RID_2349_DP6.raw | 5.5682E4 |         |         | 1.1942E5 |
| R.TMQNTSDLDтар.C | Y    | 50.31  | 1351.6038 | 12     | 0.9 | 676.8098 | 2 | 26.03 | 6        | F6:6391  | 17112021_RID_2349_DP6.raw |          |         |         |          |
| R.ISEDKNPDYR.K   | Y    | 46.51  | 1235.5781 | 10     | 1.3 | 618.7971 | 2 | 18.97 | 6        | F6:3975  | 17112021_RID_2349_DP6.raw |          |         |         |          |

total 3 peptides

XP\_032091065.1  
[back to list](#)

[Protein Coverage](#) | [Supporting Peptides](#) |  
Protein Coverage:

|     |                    |            |            |            |                    |                    |                    |                    |
|-----|--------------------|------------|------------|------------|--------------------|--------------------|--------------------|--------------------|
| 1   | MGTRDGLCQA         | RCSPPLFAES | SHLERGGVER | SNQGGGDGAS | RIAMDMMNII         | DQPIKVTEWQ         | QTYTYDSGIH         | SGMNTQVPSV         |
| 81  | SSKGLMDEDD         | LYGKQYTIKK | TTTYSQPGSG | QAQTQAELES | QLAMTRAQRI         | RAAMYPETAE         | DHTLLLTQV          | EGQQTNVQRL         |
| 161 | AEPSQMLKSA         | IVHLINYQDD | AELATRAIPE | LTKLLNDEDP | VVVSKAAMIV         | NQLSKKDASR         | RALMQSAQIV         | AAVVR <b>TMQNT</b> |
| 241 | <b>SDLDтар</b> CTT | SILHNLSHHR | EGLLSIFKSG | GIPALVRMLS | SPVESVLFYA         | ITTLHNLLLY         | QEGAKMAVRL         | ADGLQKMVPL         |
| 321 | LTKNNPKFLA         | ITTDCLQLLA | YGNQESKLII | LANGGPQALV | QIMRSYTYEK         | LLWTTSRVLK         | VLSVCPSNKP         | AIVEAGGMQA         |
| 401 | LGKHLTSSSP         | RLVQNCLWTL | RNLSDVATKQ | EGLDGVLKIL | VNQLSSDDIN         | VLTCATGTLS         | NLTCNNSKNK         | TLVTQSNGVE         |
| 481 | ALIHTILRAG         | DKEDITEPAV | CALRHLSRHR | PEAEMAQNSV | <b>R.LNYGIPAIV</b> | <b>KLLNQPNQWP</b>  | LIKATIGLIR         | NLALCPANHA         |
| 561 | PLQEAIVIPR         | LVQLLVKAHQ | DAQRHAAAGT | QQPYTDGVKM | EEIVEGCTGA         | LHILARDPMN         | RMEIFRLNTI         | PLFVQLLYSP         |
| 641 | VENIQRVAAG         | VLCELAQDKE | AADAIDAEGA | SAPLMELLHS | RNEGATATYAA        | AVLFR <b>ISEDK</b> | <b>NPDYR</b> KRVSV | ELTNSLFKHD         |
| 721 | PAAWEAAQSM         | IPIHEPYADE | LDGGYRAMYS | GEIPMDHMDM | HMDMDGDYPM         | DTYSDGVRAP         | YPDHMLA            |                    |

Supporting Peptides:

| Peptide          | Uniq | -10lgP | Mass      | Length | ppm | m/z      | z | RT    | Fraction | Scan     | Source File               | Area F1  | Area F2 | Area F3 | Area F4  |
|------------------|------|--------|-----------|--------|-----|----------|---|-------|----------|----------|---------------------------|----------|---------|---------|----------|
| R.LNYGIPAIVK.L   | Y    | 54.39  | 1086.6437 | 10     | 0.2 | 544.3292 | 2 | 49.42 | 6        | F6:14436 | 17112021_RID_2349_DP6.raw | 5.5682E4 |         |         | 1.1942E5 |
| R.TMQNTSDLDтар.C | Y    | 50.31  | 1351.6038 | 12     | 0.9 | 676.8098 | 2 | 26.03 | 6        | F6:6391  | 17112021_RID_2349_DP6.raw |          |         |         |          |
| R.ISEDKNPDYR.K   | Y    | 46.51  | 1235.5781 | 10     | 1.3 | 618.7971 | 2 | 18.97 | 6        | F6:3975  | 17112021_RID_2349_DP6.raw |          |         |         |          |

total 3 peptides

XP\_034271617.1  
[back to list](#)

[Protein Coverage](#) | [Supporting Peptides](#) |  
Protein Coverage:

1 MDMMNIIQDP IKVTEWQQTY TYDSGIHSGM NTQVPSVSSK GLMDEDDLYG KQYTIKTTT YSQPGSGQAQ TQAELESQLAM

81 TRAQRIRAA MYPETTEDHT LLLTTQVEGQ QTNVQRLAEP S QMLKSAIVH LINYQDDAEL ATRAIPELTK LLNDEDPVVV

161 KAAMIVNQLS KKEASRRALM QSAQIVA AV R **TMQNTSDLD TAR** CTTSILH NLSHHREGLL SIFKSGGIPA LVRMLSSPVE

241 SVLFYAITTL HNLLLYQEGA KMAVRLADGL QKMVPLLTKN NPKFLAITTD CLQLLAYGNQ ESKLIILANG GPQALVQIMR

321 SYTYEKLLWT TSRVLKVLVS CPSNKPAIVE AGGMQALGKH LTSSSPRLVQ NCLWTLRNL DVATKQEGLD GVLKILVNQL

401 SSDDINVLTC ATGTLSNLTC NNSKNKTLVT QSNNGVEALH TILRAGDKED ITEPAVCALR HLTSRHEPEA **MAQNSVR LNY**

481 **GIPAIVK**LLN QPNQWPLIKA TIGLIRNLAL CPANHAPLQE AAVIPRLVQL LVKAHQDAQR HAAAGTQQPY TDGVKMEEIV

561 EGCTGALHIL ARDPMNRMEI FRLNTIPLFV QLLYSPVENI QRVAAGVLCE LAQDKEAADA IDAEGASAPL MELLHSRNEG

641 TATYAAAVLF R **ISEDKNPDY** RKRVSVELTN SLFKHDPAAW EAAQSMIPIH EPYADELDGG YRGMYSGEIP MDPMDMHMDM

721 DGDYPMDTYS DGVRAPYPDH MLA

Supporting Peptides:

| Peptide           | Uniq | -10lgP | Mass      | Length | ppm | m/z      | z | RT    | Fraction | Scan     | Source File               | Area F1  | Area F2 | Area F3 | Area F4  |
|-------------------|------|--------|-----------|--------|-----|----------|---|-------|----------|----------|---------------------------|----------|---------|---------|----------|
| R.LNYGIPAIVK.L    | Y    | 54.39  | 1086.6437 | 10     | 0.2 | 544.3292 | 2 | 49.42 | 6        | F6:14436 | 17112021_RID_2349_DP6.raw | 5.5682E4 |         |         | 1.1942E5 |
| R.TMQNTSDLD TAR.C | Y    | 50.31  | 1351.6038 | 12     | 0.9 | 676.8098 | 2 | 26.03 | 6        | F6:6391  | 17112021_RID_2349_DP6.raw |          |         |         |          |
| R.ISEDKNPDYR.K    | Y    | 46.51  | 1235.5781 | 10     | 1.3 | 618.7971 | 2 | 18.97 | 6        | F6:3975  | 17112021_RID_2349_DP6.raw |          |         |         |          |

total 3 peptides

XP\_034271615.1  
[back to list](#)

| [Protein Coverage](#) | [Supporting Peptides](#) |

Protein Coverage:

1 MDMMNIIQDP IKVTEWQQTY TYDSGIHSGM NTQVPSVSSK GLMDEDDLYG KQYTIKTTT YSQPGSGQAQ TQAELESQLA

81 MTRAQRIRAA MYPETTEDHT LLLTTQVEGQ QTNVQRLAEP S QMLKSAIVH LINYQDDAEL ATRAIPELTK LLNDEDPVVV

161 SKAAMIVNQL SKKEASRRAL MQSAQIVA AV R **TMQNTSDLD TAR** CTTSIL HNLSSHREGL LSIFKSGGIP ALVRMLSSPV

241 ESVLFYAITT LHNLLLYQEG AKMAVRLADG LQKMVPLLTK NNPKFLAITT DCLQLLAYGN QESKLIILAN GGPQALVQIM

321 RSYTYEKLLW TTSRVLKVLVS VCPSNKPAIV EAGGMQALGK HLTSSSPRLV QNCLWTLRNL SDVATKQEGL DGVLKILVNQ

401 LSSDDINVLTC CATGTLSNLTC CNNSKNKTLV TQSNNGVEALI HTILRAGDKE DITEPAVCAL RHLSRHEPEA **EMAQNSVR LN**

481 **YGIPAIVK**LL NQPNQWPLIK ATIGLIRNLA LCPANHAPLQ EAAVIPRLVQ LLVKAHQDAQ RHAAAGTQQP YTDGVKMEEI

561 VEGCTGALHI LARDPMNRME IFRNTIPLF VQLLYSPVEN IQRVAAGVLC ELAQDKEAAD AIDAEGASAP LMELLHSRNE

641 GTATYAAAVL FR **ISEDKNPD YR** KRVSVELT NSLFKHDPAA WEAAQSMIPI HEPYADELDG GYRGMYSGEI PMDPMDMHMD

721 MDGDYPMDTY SDGVRAPYPD HMLA

Supporting Peptides:

| Peptide           | Uniq | -10lgP | Mass      | Length | ppm | m/z      | z | RT    | Fraction | Scan     | Source File               | Area F1  | Area F2 | Area F3 | Area F4  |
|-------------------|------|--------|-----------|--------|-----|----------|---|-------|----------|----------|---------------------------|----------|---------|---------|----------|
| R.LNYGIPAIVK.L    | Y    | 54.39  | 1086.6437 | 10     | 0.2 | 544.3292 | 2 | 49.42 | 6        | F6:14436 | 17112021_RID_2349_DP6.raw | 5.5682E4 |         |         | 1.1942E5 |
| R.TMQNTSDLD TAR.C | Y    | 50.31  | 1351.6038 | 12     | 0.9 | 676.8098 | 2 | 26.03 | 6        | F6:6391  | 17112021_RID_2349_DP6.raw |          |         |         |          |
| R.ISEDKNPDYR.K    | Y    | 46.51  | 1235.5781 | 10     | 1.3 | 618.7971 | 2 | 18.97 | 6        | F6:3975  | 17112021_RID_2349_DP6.raw |          |         |         |          |

total 3 peptides

XP\_034271618.1  
[back to list](#)

| [Protein Coverage](#) | [Supporting Peptides](#) |

Protein Coverage:

1 MDMMNIIQDP IKVTEWQQTY TYDSGIHSGM NTQVPSVSSK GLMDEDDLYG KQYTIKTTT YSQPGSGQAQ TQAELESQLA

81 MTRAQRIRAA MYPETTEDHT LLLTTQVEGQ QTNVQRLAEP S QMLKSAIVH LINYQDDAEL ATRAIPELTK LLNDEDPVVV

161 SKAAMIVNQL SKKEASRRAL MQSAQIVA AV R **TMQNTSDLD TAR** CTTSIL HNLSSHREGL LSIFKSGGIP ALVRMLSSPV

241 ESVLFYAITT LHNLLLYQEG AKMAVRLADG LQKMVPLLTK NNPKFLAITT DCLQLLAYGN QESKLIILAN GGPQALVQIM

321 RSYTYEKLLW TTSRVLKVLVS VCPSNKPAIV EAGGMQALGK HLTSSSPRLV QNCLWTLRNL SDVATKQEGL DGVLKILVNQ

401 LSSDDINVLTC CATGTLSNLTC CNNSKNKTLV TQSNNGVEALI HTILRAGDKE DITEPAVCAL RHLSRHEPEA **EMAQNSVR LN**

481 **YGIPAIVK**LL NQPNQWPLIK ATIGLIRNLA LCPANHAPLQ EAAVIPRLVQ LLVKAHQDAQ RHAAAGTQQP YTDGVKMEEI

561 VEGCTGALHI LARDPMNRME IFRNTIPLF VQLLYSPVEN IQRVAAGVLC ELAQDKEAAD AIDAEGASAP LMELLHSRNE

641 GTATYAAAVL FR **ISEDKNPD YR** KRVSVELT NSLFKHDPAA WEAAQSMIPI HEPYADELDG GYRGMYSGEI PMDPMDMHMD

721 MDGDYPMDTY SDGVRAPYPD HMLA

Supporting Peptides:

| Peptide          | Uniq | -10lgP | Mass      | Length | ppm | m/z      | z | RT    | Fraction | Scan     | Source File               | Area F1  | Area F2 | Area F3 | Area F4  |
|------------------|------|--------|-----------|--------|-----|----------|---|-------|----------|----------|---------------------------|----------|---------|---------|----------|
| R.LNYGIPAIVK.L   | Y    | 54.39  | 1086.6437 | 10     | 0.2 | 544.3292 | 2 | 49.42 | 6        | F6:14436 | 17112021_RID_2349_DP6.raw | 5.5682E4 |         |         | 1.1942E5 |
| R.TMQNTSDLDTAR.C | Y    | 50.31  | 1351.6038 | 12     | 0.9 | 676.8098 | 2 | 26.03 | 6        | F6:6391  | 17112021_RID_2349_DP6.raw |          |         |         |          |
| R.ISEDKNPDYR.K   | Y    | 46.51  | 1235.5781 | 10     | 1.3 | 618.7971 | 2 | 18.97 | 6        | F6:3975  | 17112021_RID_2349_DP6.raw |          |         |         |          |

total 3 peptides

XP\_034271616.1  
[back to list](#)

| [Protein Coverage](#) | [Supporting Peptides](#) |

|                   |                    |            |                    |            |                      |            |            |            |            |  |  |  |  |  |  |
|-------------------|--------------------|------------|--------------------|------------|----------------------|------------|------------|------------|------------|--|--|--|--|--|--|
| Protein Coverage: |                    |            |                    |            |                      |            |            |            |            |  |  |  |  |  |  |
| 1                 | MDMMNIIDQP         | IKVTEWQQTY | TYDSGIHSGM         | NTQVPSVSSK | GLMDEDDLYG           | KQYTIKTTT  | YSQPGSGQAQ | TQAELESQLA |            |  |  |  |  |  |  |
| 81                | MTRAQRIRAA         | MYPETTEDHT | LLLTTQVEGQ         | QTNVQRLAEP | SQMLKSAIVH           | LINYQDDAEL | ATRAIPELTK | LLNDEDPVVV |            |  |  |  |  |  |  |
| 161               | SKAAMIVNQL         | SKKEASRRAL | MQSAQIVA           | AVR        | <b>TMQNTSDL DTAR</b> | CTTSIL     | HNLSHHREGL | LSIFKSGGIP | ALVRMLSSPV |  |  |  |  |  |  |
| 241               | ESVLFYAITT         | LHNLLLYQEG | AKMAVRLADG         | LQKMVPLLT  | KNNPKFLAITT          | DCLQLLAYGN | QESKLIILAN | GGPQALVQIM |            |  |  |  |  |  |  |
| 321               | RSYTYEKLW          | TTSRVLKVL  | VCPSNKPAIV         | EAGGMQALGK | HLTSSSPRLV           | QNCLWTLRNL | SDVATKQEG  | DGVLKILVNQ |            |  |  |  |  |  |  |
| 401               | LSSDDINVL          | CATGTLSNLT | CNNSKNKTLV         | TQSNQVEALI | HTILRAGDKE           | DITEPAVCAL | RHLTSRHEPA | EMAQNSVR   | <b>LN</b>  |  |  |  |  |  |  |
| 481               | <b>YGIPAIVK</b> LL | NQPNQWPLIK | ATIGLIRNLA         | LCPANHAPLQ | EAAVIPRLVQ           | LLVKAHQDAQ | RHAAAGTQQP | YTDGVKMEEI |            |  |  |  |  |  |  |
| 561               | VEGCTGALHI         | LARDPMNRME | IFRLNTIPLF         | VQLLYSPVEN | IQRVAAGVLC           | ELAQDKEAAD | AIDAEGASAP | LMELLHSRNE |            |  |  |  |  |  |  |
| 641               | GTATYAAAVL         | FR         | <b>ISEDKNPD YR</b> | KRVSVELT   | NSLFKHDPAA           | WEAAQSMIPI | HEPYADELDG | GYRGMYSGEI | PMDPMDMHMD |  |  |  |  |  |  |
| 721               | MDGDYPMDTY         | SDGVRAPYPD | HMLA               |            |                      |            |            |            |            |  |  |  |  |  |  |

Supporting Peptides:

| Peptide          | Uniq | -10lgP | Mass      | Length | ppm | m/z      | z | RT    | Fraction | Scan     | Source File               | Area F1  | Area F2 | Area F3 | Area F4  |
|------------------|------|--------|-----------|--------|-----|----------|---|-------|----------|----------|---------------------------|----------|---------|---------|----------|
| R.LNYGIPAIVK.L   | Y    | 54.39  | 1086.6437 | 10     | 0.2 | 544.3292 | 2 | 49.42 | 6        | F6:14436 | 17112021_RID_2349_DP6.raw | 5.5682E4 |         |         | 1.1942E5 |
| R.TMQNTSDLDTAR.C | Y    | 50.31  | 1351.6038 | 12     | 0.9 | 676.8098 | 2 | 26.03 | 6        | F6:6391  | 17112021_RID_2349_DP6.raw |          |         |         |          |
| R.ISEDKNPDYR.K   | Y    | 46.51  | 1235.5781 | 10     | 1.3 | 618.7971 | 2 | 18.97 | 6        | F6:3975  | 17112021_RID_2349_DP6.raw |          |         |         |          |

total 3 peptides

XP\_025022317.1  
[back to list](#)

| [Protein Coverage](#) | [Supporting Peptides](#) |

|                   |                   |            |                    |            |                      |            |            |            |            |  |  |  |  |  |  |
|-------------------|-------------------|------------|--------------------|------------|----------------------|------------|------------|------------|------------|--|--|--|--|--|--|
| Protein Coverage: |                   |            |                    |            |                      |            |            |            |            |  |  |  |  |  |  |
| 1                 | MDVMNLIEQP        | IKVTEWQQTY | TYDSGIHSGM         | NTQVPSVSSK | GLMDEDDLYG           | KQYTIKTTT  | YSQAGPGQAQ | AQAQAELESQ |            |  |  |  |  |  |  |
| 81                | LAMTRAQRIR        | AAMYPETVED | HSLLVTTQVE         | GQQTNVQRLA | EPSQMLKSAI           | VHLINYQDDA | ELATRAIPEL | TKLLNDEDPV |            |  |  |  |  |  |  |
| 161               | VVSKAAMIVN        | QLSKKEASRR | ALMQSAQIVA         | AVVR       | <b>TMQNTS DLDTAR</b> | CTTS       | ILHNLSHHRE | GLLSIFKSGG | IPALVRMLSS |  |  |  |  |  |  |
| 241               | PVESVLFYAI        | TTLHNLLLYQ | EGAKMAVRLA         | DGLQKMVPLL | TKNNPKFLAI           | TTDCLQLLAY | GNQESKLIIL | ANGGPQALVQ |            |  |  |  |  |  |  |
| 321               | IMRSYTYEKL        | LWTTSRVLKV | LSVCPSNKPA         | IVEAGGMQAL | GKHLTSSSPR           | LVQNCLWTLR | NLSDVATKQE | GLDGVLKILV |            |  |  |  |  |  |  |
| 401               | NQLSSDDINV        | LTCATGTLSN | LTCNNSKNKT         | LVTQSNQVEA | LIHTILRAGD           | KEDITEPAVC | ALRHLTSRHP | EAEMAQNSVR |            |  |  |  |  |  |  |
| 481               | <b>LNYGIPAIVK</b> | LLNQPNQWPL | IKATIGLIRN         | LALCPANHAP | LQEA                 | AAVIPRL    | VQLLVKAHQD | AQRHAAAGTQ | QPYTDGVKME |  |  |  |  |  |  |
| 561               | EIVEGCTGAL        | HILARDPMNR | MEIFRLNTIP         | LFVQLLYSPV | ENIQRVAAGV           | LCELAQDKEA | ADAIDAEGAS | APLMELLHSR |            |  |  |  |  |  |  |
| 641               | NEGATYAAA         | VLFR       | <b>ISEDKN PDYR</b> | KRVSVSVE   | LTNSLFKHDP           | AAWEAAQSMI | PIHEPYADEL | DGGYRGMYPG | EIPMDPMDMH |  |  |  |  |  |  |
| 721               | MDMDGDYPMD        | TYSDGVRAPY | PDHMLA             |            |                      |            |            |            |            |  |  |  |  |  |  |

Supporting Peptides:

| Peptide          | Uniq | -10lgP | Mass      | Length | ppm | m/z      | z | RT    | Fraction | Scan     | Source File               | Area F1  | Area F2 | Area F3 | Area F4  |
|------------------|------|--------|-----------|--------|-----|----------|---|-------|----------|----------|---------------------------|----------|---------|---------|----------|
| R.LNYGIPAIVK.L   | Y    | 54.39  | 1086.6437 | 10     | 0.2 | 544.3292 | 2 | 49.42 | 6        | F6:14436 | 17112021_RID_2349_DP6.raw | 5.5682E4 |         |         | 1.1942E5 |
| R.TMQNTSDLDTAR.C | Y    | 50.31  | 1351.6038 | 12     | 0.9 | 676.8098 | 2 | 26.03 | 6        | F6:6391  | 17112021_RID_2349_DP6.raw |          |         |         |          |
| R.ISEDKNPDYR.K   | Y    | 46.51  | 1235.5781 | 10     | 1.3 | 618.7971 | 2 | 18.97 | 6        | F6:3975  | 17112021_RID_2349_DP6.raw |          |         |         |          |

total 3 peptides

XP\_007428111.1  
[back to list](#)

| [Protein Coverage](#) | [Supporting Peptides](#) |

Protein Coverage:

1 MDVMNLIEQP IKVTEWQQTY TYDSGIHSGM NTQVPSVSSK GLMDEDDLYG KQYTIKKTST YSQAGPGQAQ AQAQAELESQ

81 LAMTRAQRIR AAMPETVED HSLLVTTQVE GQQTNVQRLA EPSQMLKSAI VHLINYQDDA ELATRAIPEL TKLLNDEDPV

161 VVSKAAMIVN QLSKKEASRR ALMQSAQIVA AVVR**TMQNTS DLDTAR**CTTS ILHNLSHHRE GLLSIFKSGG IPALVRMLSS

241 PVESVLFYAI TTLHNNLLLYQ EGAKMAVRLA DGLQKMVPLL TKNNPKFLAI TTDCLQLLAY GNQESKLIIL ANGGPQALVQ

321 IMRSYTYEKL LWTTSRVLKV LSVCP SNKPA IVEAGGMQAL GKHLTSSSPR LVQNCLWTLR NLSDVATKQE GLDGVLKILV

401 NQLSSDDINV LTCATGTLSN LTCNNSKNKT LVTQSNQVEA LIHTILRAGD KEDITEPAVC ALRHLTSRHP EAEMAQNSVR

481 **LNYGIPAIVK** LLNQPNQWPL IKATIGLIRN LALCPANHAP LQEAAVIPRL VQLLVKAHQD AQRHAAAGTQ QPYTDGVKME

561 EIVEGCTGAL HILARDPMNR MEIFRLNTIP LFVQLLYSPV ENIQRVAAGV LCELAQDKEA ADAIDAEGAS APLMELLHSR

641 NEGATYAAA VLFR**ISEDKN PDYR**KRVSVE LTNSLFKHDP AAWEEAQSMI PIHEPYADEL DGGYRGMYPG EIPMDPMDMH

721 MDMGDGYPM DYS DGVRAFY PDHMLA

Supporting Peptides:

| Peptide           | Uniq -10lgP | Mass  | Length    | ppm | m/z | z        | RT | Fraction | Scan | Source File                        | Area F1  | Area F2 | Area F3 | Area F4  |
|-------------------|-------------|-------|-----------|-----|-----|----------|----|----------|------|------------------------------------|----------|---------|---------|----------|
| R.LNYGIPAIVK.L    | Y           | 54.39 | 1086.6437 | 10  | 0.2 | 544.3292 | 2  | 49.42    | 6    | F6:14436 17112021_RID_2349_DP6.raw | 5.5682E4 |         |         | 1.1942E5 |
| R.TMQNTSDLD TAR.C | Y           | 50.31 | 1351.6038 | 12  | 0.9 | 676.8098 | 2  | 26.03    | 6    | F6:6391 17112021_RID_2349_DP6.raw  |          |         |         |          |
| R.ISEDKNPDYR.K    | Y           | 46.51 | 1235.5781 | 10  | 1.3 | 618.7971 | 2  | 18.97    | 6    | F6:3975 17112021_RID_2349_DP6.raw  |          |         |         |          |

total 3 peptides

TRINITY\_DN459

[back to list](#)

| [Protein Coverage](#) | [Supporting Peptides](#) |

Protein Coverage:

1 QSADCPIDRY HRNGQPCLQN YGYCYNGKCP IMHHQCYL F GANSTKGQDG CFDWNKKG TG DFYCRKENDV PIPCAPEDVK

81 CGRLFCEILP NTCK**HAPEDN GMVDPG**TKCE DKKVCMNRKC VDVNTAY

Supporting Peptides:

| Peptide                      | Uniq -10lgP | Mass  | Length    | ppm | m/z  | z        | RT | Fraction | Scan | Source File                       | Area F1  | Area F2  |
|------------------------------|-------------|-------|-----------|-----|------|----------|----|----------|------|-----------------------------------|----------|----------|
| K.HAPEDNGMVDPG TK.C          | Y           | 76.97 | 1466.6460 | 14  | -0.6 | 734.3298 | 2  | 23.50    | 4    | F4:5677 17112021_RID_2349_DP4.raw | 1.8448E6 | 3.4934E5 |
| K.HAPEDNGM(+15.99) VDPG TK.C | Y           | 63.27 | 1482.6409 | 14  | 0.1  | 742.3278 | 2  | 23.52    | 4    | F4:5529 17112021_RID_2349_DP4.raw | 1.8341E6 |          |

total :

TRINITY\_DN459

[back to list](#)

| [Protein Coverage](#) | [Supporting Peptides](#) |

Protein Coverage:

1 CEQCRFKRAG TECRRASECD LPEYCTGQSA ECPTDVFH SN GKPCLNNFGY CYNGKCPIMY HQCYALFGAN ATVGQDGC FE

81 WNKKGESYFY CRKENGVP IP CAPEDGYVKC GRLFCEILPN TCK**HAPEDNG MVDPG**TKCED KKVCMNRKCV DVNTAY

Supporting Peptides:

| Peptide                      | Uniq -10lgP | Mass  | Length    | ppm | m/z  | z        | RT | Fraction | Scan | Source File                       | Area F1  | Area F2  |
|------------------------------|-------------|-------|-----------|-----|------|----------|----|----------|------|-----------------------------------|----------|----------|
| K.HAPEDNGMVDPG TK.C          | Y           | 76.97 | 1466.6460 | 14  | -0.6 | 734.3298 | 2  | 23.50    | 4    | F4:5677 17112021_RID_2349_DP4.raw | 1.8448E6 | 3.4934E5 |
| K.HAPEDNGM(+15.99) VDPG TK.C | Y           | 63.27 | 1482.6409 | 14  | 0.1  | 742.3278 | 2  | 23.52    | 4    | F4:5529 17112021_RID_2349_DP4.raw | 1.8341E6 |          |

total :

TRINITY\_DN3041

[back to list](#)

| [Protein Coverage](#) | [Supporting Peptides](#) |

Protein Coverage:

1 RLFCEILPNT CK**HAPEDNGM VDPG**TKCEDK KVCNMNRKCVD VNTAY

Supporting Peptides:

| Peptide                      | Uniq -10lgP | Mass  | Length    | ppm | m/z  | z        | RT | Fraction | Scan | Source File                       | Area F1  | Area F2  |
|------------------------------|-------------|-------|-----------|-----|------|----------|----|----------|------|-----------------------------------|----------|----------|
| K.HAPEDNGMVDPG TK.C          | Y           | 76.97 | 1466.6460 | 14  | -0.6 | 734.3298 | 2  | 23.50    | 4    | F4:5677 17112021_RID_2349_DP4.raw | 1.8448E6 | 3.4934E5 |
| K.HAPEDNGM(+15.99) VDPG TK.C | Y           | 63.27 | 1482.6409 | 14  | 0.1  | 742.3278 | 2  | 23.52    | 4    | F4:5529 17112021_RID_2349_DP4.raw | 1.8341E6 |          |

total :

TRINITY\_DN2

[back to list](#)

[Protein Coverage](#) | [Supporting Peptides](#) |

Protein Coverage:

1RAASHMKERLPRVGITCRRSLFNPRSNWIWSAGRTMRCWVFLAVVAATLLAVRARDPFAEDCRIHEYPPAGPTYKGTIPE

81YVINLDLPPSERWVQVIHDKKNELKAVIKTVRDIVLSFIHEKFVASMESKIGWLCSTLPYPFNEEIKGIA SAIDGPLGDV

161VLFNIFYEIFTVCTSIIAEDKTGKLYHARNLDFGLFLGWDIQNNSWDTTQKLKPLMVSLDFQKNNKTVFKSANFAGYVGI

241VSGVKQGLFTLTMNERFSLDGGYIGIFEWLIGKR**DGWWS****FLTR**AVLENTSYEDAKDKLVNTK**LLAPAY****FIVGGN**KLDE

321GCIITRSRTATLNIKNLDAKNGNWFVIETNYDPWKAPLII DRRRHPAMNCLNQTGQEKIALPGLYNVLSTKPILNKLTVS

401TTLLEVSEGH IETYLRCDCP PCSPW

Supporting Peptides:

| Peptide             | Uniq  | -10lgP    | Mass | Length | ppm      | m/z | z     | RT | Fraction | Scan     | Source File               | Area F1 | Area F2 | Area F3  | Area F4  |
|---------------------|-------|-----------|------|--------|----------|-----|-------|----|----------|----------|---------------------------|---------|---------|----------|----------|
| K.LLAPAYFIVGGNK.L Y | 56.67 | 1361.7706 | 13   | 0.3    | 681.8928 | 2   | 57.51 | 4  |          | F4:17066 | 17112021_RID_2349_DP4.raw |         |         |          | 3.8785E: |
| R.DGWWSFLTR.A Y     | 52.96 | 1297.5913 | 10   | 3.2    | 649.8050 | 2   | 74.68 | 3  |          | F3:22606 | 17112021_RID_2349_DP3.raw |         |         | 7.0205E4 |          |
| total 2 peptides    |       |           |      |        |          |     |       |    |          |          |                           |         |         |          |          |

TRINITY\_DN7999

[back to list](#)

[Protein Coverage](#) | [Supporting Peptides](#) |

Protein Coverage:

1KSQMYLQMNHLRSGDTTVYHCSGDGNYYAFDVWGP GTVVTVTNDPPK**APS VFPLTPGHET QVA**KALSTAS NVTIGCLIKN

81YFPEPATVQWNSGAITSGIQNFPPVLLASNHYSHTSLITI PASQWQSESFQCNVEHAATNTRINKIERSAIRSPVGPEI

161TVFHSCDSRSDSGTVQLWCHISGFYFKQLDIDWKVGSRSGLHPYNYPPWQNP GTYTFSTASVVNITQDDWLEGNSYYCE

241ATHAASQTKVKGKAKCKDSSCPSGDIKVDILPPRPKALYIDRNSKISCVVSNLQNEQGLKFTWFREKSGHLTPDAIET

321TEGSNGGYIVLSRLGIFSEDWDSGETFTCVVEHPTFVSPVTKKISKSRGKHSAPKVYVFPHPQEELNPGRSVSLTCLVTG

401FSPEAADVQWLEDHNPLSEDNSVTTPPMKNKHDDSYFLYSKLLVPKTDWNTKSFTCMVVHEDLPMKFTQRNISRTQGGK

Supporting Peptides:

| Peptide                | Uniq  | -10lgP    | Mass | Length | ppm      | m/z | z     | RT | Fraction | Scan     | Source File               | Area F1 | Area F2 | Area F3 | Area F4 | Area F5 |
|------------------------|-------|-----------|------|--------|----------|-----|-------|----|----------|----------|---------------------------|---------|---------|---------|---------|---------|
| K.APSVFPLTPGHETQVA.K Y | 55.91 | 1649.8413 | 16   | 0.2    | 825.9281 | 2   | 48.79 | 7  |          | F7:14307 | 17112021_RID_2349_DP7.raw |         |         |         |         |         |
| K.APSVFPLTPGHETQ.V Y   | 50.42 | 1479.7357 | 14   | 0.6    | 740.8756 | 2   | 45.66 | 7  |          | F7:13339 | 17112021_RID_2349_DP7.raw |         |         |         |         |         |
| total 2 peptides       |       |           |      |        |          |     |       |    |          |          |                           |         |         |         |         |         |

TRINITY\_DN7999

[back to list](#)

[Protein Coverage](#) | [Supporting Peptides](#) |

Protein Coverage:

1AKSQLYLQMSLKAEDTAVY YCTRHIYGLGWLYYAFDVWGP GTVVTVTNDPPK**APSVFPL TPGHETQVA**KALSTASNVTI

81GCLIKNYFPEPATVQWNSGAITSGIQNFPPVLLASNHYSH TSLITIPASQWQSESFQCNVEHAATNTRINKIERSAIRS

161PVGPEITVFHSCDSRSDSGTVQLWCHISGFYFKQLDIDWKVGSRSGLHPYNYPPWQNP GTYTFSTASVVNITQDDWLEG

241NSYYCEATHAASQTKVKGKAKCKDGSSCPSGDIKVDILPPRPKALYIDRNSKISCVVSNLQNEQGLKFTWFREKSGHLTPDAIET

321PDAIETTEGSNGGYIVLSRLGIFSEDWDSGETFTCVVEHPTFVSPVTKKISKSRGKHSAPKVYVFPHPQEELNPGRSVSLTCLVTG

401TCLVTGFSPEAADVQWLEDHNPLSEDNSVTTPPMKNKHDDSYFLYSKLLVPKTDWNTKSFTCMVVHEDLPMKFTQRNISRTQGGK

481TQGGK

Supporting Peptides:

| Peptide                | Uniq  | -10lgP    | Mass | Length | ppm      | m/z | z     | RT | Fraction | Scan     | Source File               | Area F1 | Area F2 | Area F3 | Area F4 | Area F5 |
|------------------------|-------|-----------|------|--------|----------|-----|-------|----|----------|----------|---------------------------|---------|---------|---------|---------|---------|
| K.APSVFPLTPGHETQVA.K Y | 55.91 | 1649.8413 | 16   | 0.2    | 825.9281 | 2   | 48.79 | 7  |          | F7:14307 | 17112021_RID_2349_DP7.raw |         |         |         |         |         |
| K.APSVFPLTPGHETQ.V Y   | 50.42 | 1479.7357 | 14   | 0.6    | 740.8756 | 2   | 45.66 | 7  |          | F7:13339 | 17112021_RID_2349_DP7.raw |         |         |         |         |         |
| total 2 peptides       |       |           |      |        |          |     |       |    |          |          |                           |         |         |         |         |         |

TRINITY\_DN13494

[back to list](#)

[Protein Coverage](#) | [Supporting Peptides](#) |

Protein Coverage:

1MEGLRGGLSLAGLLSLLLVA GVMKEASTEVS CGVPALGRIVGGSDARNGQWPWQANLNFN GVHACGGTTLITLQWLVTAAH

81CFPK**ANQIDM YEVALGSYQL**KKNPSPDIQVILVEEVIKYPDYSEDESSQGDIALVKLKVPA TYTRTVRPICLPASSVTFFP

161GMRCTVTGWGNVLADTSLPS PMTLQQLEVP IIGLENCKCLYGRNPDPDGS HTLHNDMMCA GFAEGKKDAC QGDSGGPLSC

241LVDNAWFLAGVSWGDNCGEPNRPGVYIR**L PVYADWIK**QRPVEVQLQQVTVPFGPTPEESFCPNSTSGGGPYDDIQPSPG

321WSRPLNPKDSTPSGSVSIACMVGLPLLLLLL LQSCW

Supporting Peptides:

| Peptide               | Uniq | -10lgP | Mass      | Length | ppm | m/z      | z | RT    | Fraction | Scan     | Source File               | Area F1  | Area F2 | Area F3 | z |
|-----------------------|------|--------|-----------|--------|-----|----------|---|-------|----------|----------|---------------------------|----------|---------|---------|---|
| R.LPVYADWIK.Q         | Y    | 65.35  | 1103.6014 | 9      | 0.5 | 552.8083 | 2 | 54.90 | 2        | F2:15975 | 12112021_RID_2349_DP2.raw | 6.1755E5 |         |         |   |
| K.ANQIDMYEVALGSYQLK.N | Y    | 54.76  | 1941.9506 | 17     | 1.7 | 971.9843 | 2 | 60.47 | 2        | F2:17731 | 12112021_RID_2349_DP2.raw | 1.1688E5 |         |         |   |

total 2 peptides

A8Y7P1.1

[back to list](#)

| [Protein Coverage](#) | [Supporting Peptides](#) |

Protein Coverage:

1 MSSGGLLLLL GLLTLWAE~~LT~~ PISGHDRPKF CYLPADPGEC LAHMR**SFYYD SESKK**CKEFI YGGCHGNANK FPSRDKCRQT

81 CGGK

Supporting Peptides:

| Peptide        | Uniq | -10lgP | Mass      | Length | ppm | m/z      | z | RT    | Fraction | Scan    | Source File               | Area F1 | Area F2 | Area F3 | Area F4 | Area F5 | Area F6 | z |
|----------------|------|--------|-----------|--------|-----|----------|---|-------|----------|---------|---------------------------|---------|---------|---------|---------|---------|---------|---|
| R.SFYYDSESKK.C | Y    | 70.58  | 1252.5612 | 10     | 0.4 | 627.2881 | 2 | 25.22 | 7        | F7:6242 | 17112021_RID_2349_DP7.raw |         |         |         |         |         |         | 3 |
| R.SFYYDSESK.K  | Y    | 43.22  | 1124.4662 | 9      | 0.1 | 563.2404 | 2 | 31.78 | 7        | F7:8493 | 17112021_RID_2349_DP7.raw |         |         |         |         |         |         | 4 |

total 2 peptides

CAL69604.1

[back to list](#)

| [Protein Coverage](#) | [Supporting Peptides](#) |

Protein Coverage:

1 MSSGGLLLLL GLLTLWAE~~LT~~ PISGHDRPKF CYLPADPGEC MAYIR**SFYYD SESKK**CKEFI YGGCHGNANN FPTRDKCRQT

81 CRGK

Supporting Peptides:

| Peptide        | Uniq | -10lgP | Mass      | Length | ppm | m/z      | z | RT    | Fraction | Scan    | Source File               | Area F1 | Area F2 | Area F3 | Area F4 | Area F5 | Area F6 | z |
|----------------|------|--------|-----------|--------|-----|----------|---|-------|----------|---------|---------------------------|---------|---------|---------|---------|---------|---------|---|
| R.SFYYDSESKK.C | Y    | 70.58  | 1252.5612 | 10     | 0.4 | 627.2881 | 2 | 25.22 | 7        | F7:6242 | 17112021_RID_2349_DP7.raw |         |         |         |         |         |         | 3 |
| R.SFYYDSESK.K  | Y    | 43.22  | 1124.4662 | 9      | 0.1 | 563.2404 | 2 | 31.78 | 7        | F7:8493 | 17112021_RID_2349_DP7.raw |         |         |         |         |         |         | 4 |

total 2 peptides

A8Y7N6.1

[back to list](#)

| [Protein Coverage](#) | [Supporting Peptides](#) |

Protein Coverage:

1 MSSGGLLLLL GLLTLWAE~~LT~~ PISGHDRPKF CYLPADPGEC MAYIR**SFYYD SESKK**CKEFI YGGCHGNANN FPTRDKCRQT

81 CRGK

Supporting Peptides:

| Peptide        | Uniq | -10lgP | Mass      | Length | ppm | m/z      | z | RT    | Fraction | Scan    | Source File               | Area F1 | Area F2 | Area F3 | Area F4 | Area F5 | Area F6 | z |
|----------------|------|--------|-----------|--------|-----|----------|---|-------|----------|---------|---------------------------|---------|---------|---------|---------|---------|---------|---|
| R.SFYYDSESKK.C | Y    | 70.58  | 1252.5612 | 10     | 0.4 | 627.2881 | 2 | 25.22 | 7        | F7:6242 | 17112021_RID_2349_DP7.raw |         |         |         |         |         |         | 3 |
| R.SFYYDSESK.K  | Y    | 43.22  | 1124.4662 | 9      | 0.1 | 563.2404 | 2 | 31.78 | 7        | F7:8493 | 17112021_RID_2349_DP7.raw |         |         |         |         |         |         | 4 |

total 2 peptides

CAL69609.1

[back to list](#)

| [Protein Coverage](#) | [Supporting Peptides](#) |

Protein Coverage:

1 MSSGGLLLLL GLLTLWAE~~LT~~ PISGHDRPKF CYLPADPGEC LAHMR**SFYYD SESKK**CKEFI YGGCHGNANK FPSRDKCRQT

81 CGGK

Supporting Peptides:

| Peptide        | Uniq | -10lgP | Mass      | Length | ppm | m/z      | z | RT    | Fraction | Scan    | Source File               | Area F1 | Area F2 | Area F3 | Area F4 | Area F5 | Area F6 | z |
|----------------|------|--------|-----------|--------|-----|----------|---|-------|----------|---------|---------------------------|---------|---------|---------|---------|---------|---------|---|
| R.SFYYDSESKK.C | Y    | 70.58  | 1252.5612 | 10     | 0.4 | 627.2881 | 2 | 25.22 | 7        | F7:6242 | 17112021_RID_2349_DP7.raw |         |         |         |         |         |         | 3 |
| R.SFYYDSESK.K  | Y    | 43.22  | 1124.4662 | 9      | 0.1 | 563.2404 | 2 | 31.78 | 7        | F7:8493 | 17112021_RID_2349_DP7.raw |         |         |         |         |         |         | 4 |

total 2 peptides

A8Y7P5.1

[back to list](#)

| [Protein Coverage](#) | [Supporting Peptides](#) |

8/2/22, 12:12 PM

proteins

Protein Coverage:

1

MSSGGLLLLL GLLTLWAELT PISGHDRPKF CYLPADPGEC LAHMR

SFYYD SESKK

CKEFI YGGCHGNANK FPSRDKCRQT

81

CGASAKGRPT

Supporting Peptides:

| Peptide        | Uniq -10lgP | Mass  | Length    | ppm | m/z | z        | RT | Fraction | Scan | Source File                       | Area F1 | Area F2 | Area F3 | Area F4 | Area F5 | Area F6 | z |
|----------------|-------------|-------|-----------|-----|-----|----------|----|----------|------|-----------------------------------|---------|---------|---------|---------|---------|---------|---|
| R.SFYYDSESKK.C | Y           | 70.58 | 1252.5612 | 10  | 0.4 | 627.2881 | 2  | 25.22    | 7    | F7:6242 17112021_RID_2349_DP7.raw |         |         |         |         |         |         | 3 |
| R.SFYYDSESK.K  | Y           | 43.22 | 1124.4662 | 9   | 0.1 | 563.2404 | 2  | 31.78    | 7    | F7:8493 17112021_RID_2349_DP7.raw |         |         |         |         |         |         | 4 |

total 2 peptides

AFD04724.1

[back to list](#)

| [Protein Coverage](#) | [Supporting Peptides](#) |

Protein Coverage:

1

MSSGGLLLLL GLLALWAELT PISGHDRPKF CYLPADPGEC MAYIR

SFYYD SESKK

CKEFI YGGCHGNANN FPTRDKCRQT

81

CRAPRKGRHT

Supporting Peptides:

| Peptide        | Uniq -10lgP | Mass  | Length    | ppm | m/z | z        | RT | Fraction | Scan | Source File                       | Area F1 | Area F2 | Area F3 | Area F4 | Area F5 | Area F6 | z |
|----------------|-------------|-------|-----------|-----|-----|----------|----|----------|------|-----------------------------------|---------|---------|---------|---------|---------|---------|---|
| R.SFYYDSESKK.C | Y           | 70.58 | 1252.5612 | 10  | 0.4 | 627.2881 | 2  | 25.22    | 7    | F7:6242 17112021_RID_2349_DP7.raw |         |         |         |         |         |         | 3 |
| R.SFYYDSESK.K  | Y           | 43.22 | 1124.4662 | 9   | 0.1 | 563.2404 | 2  | 31.78    | 7    | F7:8493 17112021_RID_2349_DP7.raw |         |         |         |         |         |         | 4 |

total 2 peptides

CAL69613.1

[back to list](#)

| [Protein Coverage](#) | [Supporting Peptides](#) |

Protein Coverage:

1

MSSGGLLLLL GLLTLWAELT PISGHDRPKF CYLPADPGEC LAHMR

SFYYD SESKK

CKEFI YGGCHGNANK FPSRDKCRQT

81

CGASAKGRPT

Supporting Peptides:

| Peptide        | Uniq -10lgP | Mass  | Length    | ppm | m/z | z        | RT | Fraction | Scan | Source File                       | Area F1 | Area F2 | Area F3 | Area F4 | Area F5 | Area F6 | z |
|----------------|-------------|-------|-----------|-----|-----|----------|----|----------|------|-----------------------------------|---------|---------|---------|---------|---------|---------|---|
| R.SFYYDSESKK.C | Y           | 70.58 | 1252.5612 | 10  | 0.4 | 627.2881 | 2  | 25.22    | 7    | F7:6242 17112021_RID_2349_DP7.raw |         |         |         |         |         |         | 3 |
| R.SFYYDSESK.K  | Y           | 43.22 | 1124.4662 | 9   | 0.1 | 563.2404 | 2  | 31.78    | 7    | F7:8493 17112021_RID_2349_DP7.raw |         |         |         |         |         |         | 4 |

total 2 peptides

A8Y7N7.1

[back to list](#)

| [Protein Coverage](#) | [Supporting Peptides](#) |

Protein Coverage:

1

MSSGGLLLLL GLLTLWAELT PISGHDRPKF CYLPADPGEC MAYIR

SFYYD SESKK

CKEFI YGGCHGNANN FPTRDKCRQT

81

CRAPRKGRHT

Supporting Peptides:

| Peptide        | Uniq -10lgP | Mass  | Length    | ppm | m/z | z        | RT | Fraction | Scan | Source File                       | Area F1 | Area F2 | Area F3 | Area F4 | Area F5 | Area F6 | z |
|----------------|-------------|-------|-----------|-----|-----|----------|----|----------|------|-----------------------------------|---------|---------|---------|---------|---------|---------|---|
| R.SFYYDSESKK.C | Y           | 70.58 | 1252.5612 | 10  | 0.4 | 627.2881 | 2  | 25.22    | 7    | F7:6242 17112021_RID_2349_DP7.raw |         |         |         |         |         |         | 3 |
| R.SFYYDSESK.K  | Y           | 43.22 | 1124.4662 | 9   | 0.1 | 563.2404 | 2  | 31.78    | 7    | F7:8493 17112021_RID_2349_DP7.raw |         |         |         |         |         |         | 4 |

total 2 peptides

CAL69605.1

[back to list](#)

| [Protein Coverage](#) | [Supporting Peptides](#) |

Protein Coverage:

1

MSSGGLLLLL GLLTLWAELT PISGHDRPKF CYLPADPGEC MAYIR

SFYYD SESKK

CKEFI YGGCHGNANN FPTRDKCRQT

81

CRAPRKGRHT

Supporting Peptides:

| Peptide        | Uniq -10lgP | Mass  | Length    | ppm | m/z | z        | RT | Fraction | Scan | Source File                       | Area F1 | Area F2 | Area F3 | Area F4 | Area F5 | Area F6 | z |
|----------------|-------------|-------|-----------|-----|-----|----------|----|----------|------|-----------------------------------|---------|---------|---------|---------|---------|---------|---|
| R.SFYYDSESKK.C | Y           | 70.58 | 1252.5612 | 10  | 0.4 | 627.2881 | 2  | 25.22    | 7    | F7:6242 17112021_RID_2349_DP7.raw |         |         |         |         |         |         | 3 |

total 2 peptides

file:///C:/Users/senra/AppData/Local/Temp/Rar\$EXa4564.42349/Supplementary File S1/protein.html

175/224

| Peptide      | Uniq -10lgP | Mass  | Length    | ppm | m/z | z        | RT | Fraction | Scan | Source File                       | Area F1 | Area F2 | Area F3 | Area F4 | Area F5 | Area F6 |   |
|--------------|-------------|-------|-----------|-----|-----|----------|----|----------|------|-----------------------------------|---------|---------|---------|---------|---------|---------|---|
| R.SFYDSESK.K | Y           | 43.22 | 1124.4662 | 9   | 0.1 | 563.2404 | 2  | 31.78    | 7    | F7:8493 17112021_RID_2349_DP7.raw |         |         |         |         |         |         | 4 |

total 2 peptides

TRINITY\_DN960  
[back to list](#)

[Protein Coverage](#) | [Supporting Peptides](#) |  
Protein Coverage:

|     |            |            |             |            |            |            |            |            |            |  |  |  |  |  |  |  |  |
|-----|------------|------------|-------------|------------|------------|------------|------------|------------|------------|--|--|--|--|--|--|--|--|
| 1   | AWDGLPRPWC | PAVRGSRARK | ARSEEEEEEEA | PAELRPQSAP | SGPVSPPPR  | PGEGGPASDG | WLDRDGSPLL | LPPPPPPAGA |            |  |  |  |  |  |  |  |  |
| 81  | EDAVGASPAG | RLYKARTAMP | PLRANPARQA  | NAAPFGSAVR | AFEDSLSLSL | ARSRPEALPA | PAHSGMFVSR | LAASGLLLLS |            |  |  |  |  |  |  |  |  |
| 161 | LLALSLDGKP | LKQKWMPMPG | EIPPLEQRWP  | GPKVPPLEQR | WPGPEIPPLE | QRWPGPQIPP | LQQK       | WRGPLQ     | PEAPPLMEPH |  |  |  |  |  |  |  |  |
| 241 | QLSAGGTAL  | REELSPRAEA | AQHPGGSGGG  | WRDENEPKK  | LPPSSCFGHK | IDRIGSVSGL | GCNKFKPGH  |            |            |  |  |  |  |  |  |  |  |

Supporting Peptides:

| Peptide          | Uniq -10lgP | Mass  | Length    | ppm | m/z | z        | RT | Fraction | Scan | Source File                        | Area F1 | Area F2 | Area F3 | Area F4 | Area F5 | Area F6 |         |
|------------------|-------------|-------|-----------|-----|-----|----------|----|----------|------|------------------------------------|---------|---------|---------|---------|---------|---------|---------|
| R.WPGPQIPPLQK.W  | Y           | 61.81 | 1387.7612 | 12  | 0.7 | 694.8884 | 2  | 49.77    | 5    | F5:14595 17112021_RID_2349_DP5.raw |         |         |         |         |         |         | 3.7975E |
| R.WPGPEIPPLEQR.W | Y           | 57.32 | 1417.7354 | 12  | 0.2 | 709.8751 | 2  | 53.12    | 5    | F5:15698 17112021_RID_2349_DP5.raw |         |         |         |         |         |         | 2.0576E |

total 2 peptides

TRINITY\_DN960  
[back to list](#)

[Protein Coverage](#) | [Supporting Peptides](#) |  
Protein Coverage:

|     |            |            |             |            |            |            |            |            |            |  |  |  |  |  |  |  |  |
|-----|------------|------------|-------------|------------|------------|------------|------------|------------|------------|--|--|--|--|--|--|--|--|
| 1   | AWDGLPRPWC | PAVRGSRARK | ARSEEEEEEEA | PAELRPQSAP | SGPVSPPPR  | PGEGGPASDG | WLDRDGSPLL | LPPPPPPAGA |            |  |  |  |  |  |  |  |  |
| 81  | EDAVGASPAG | RLYKARTAMP | PLRANPARQA  | NAAPFGSAVR | AFEDSLSLSL | ARSRPEALPA | PAHSGMFVSR | LAASGLLLLS |            |  |  |  |  |  |  |  |  |
| 161 | LLALSLDGKP | LKQKWMPMPG | EIPPLEQRWP  | GPKVPPLEQR | WPGPEIPPLE | QRWPGPKVPP | LEQRWPGPEI | PPLQQRWPGP |            |  |  |  |  |  |  |  |  |
| 241 | KVPPLQQR   | WP         | GPOIPPLQK   | WRGPLQPEAP | PLMEPHQLSA | GGTTALREEL | SPRAEAAQHP | GGSGGGWRDE | NEPPKKLPSS |  |  |  |  |  |  |  |  |
| 321 | SCFGHKIDRI | GSVSLG     | GCNK        | FKPGH      |            |            |            |            |            |  |  |  |  |  |  |  |  |

Supporting Peptides:

| Peptide          | Uniq -10lgP | Mass  | Length    | ppm | m/z | z        | RT | Fraction | Scan | Source File                        | Area F1 | Area F2 | Area F3 | Area F4 | Area F5 | Area F6 |         |
|------------------|-------------|-------|-----------|-----|-----|----------|----|----------|------|------------------------------------|---------|---------|---------|---------|---------|---------|---------|
| R.WPGPQIPPLQK.W  | Y           | 61.81 | 1387.7612 | 12  | 0.7 | 694.8884 | 2  | 49.77    | 5    | F5:14595 17112021_RID_2349_DP5.raw |         |         |         |         |         |         | 3.7975E |
| R.WPGPEIPPLEQR.W | Y           | 57.32 | 1417.7354 | 12  | 0.2 | 709.8751 | 2  | 53.12    | 5    | F5:15698 17112021_RID_2349_DP5.raw |         |         |         |         |         |         | 2.0576E |

total 2 peptides

TRINITY\_DN960  
[back to list](#)

[Protein Coverage](#) | [Supporting Peptides](#) |  
Protein Coverage:

|     |             |            |            |            |            |            |            |            |             |            |  |  |  |  |  |  |  |
|-----|-------------|------------|------------|------------|------------|------------|------------|------------|-------------|------------|--|--|--|--|--|--|--|
| 1   | KKERKKERKK  | ERKKERKKER | KKERKKEAGW | GGRRGFSTPT | FCQPSPTQSV | CKAWDGLPRP | WCPAVRGSR  | RKARSEEEEE |             |            |  |  |  |  |  |  |  |
| 81  | EAPAEALRPQS | APSGVPVSP  | PRPGEGGPAS | DGWLDRDGSP | LLLPPPPPPA | GAEDAVGASP | AGRLYKARTA | MPPLRANPAR |             |            |  |  |  |  |  |  |  |
| 161 | QANAAPFGSA  | VRAFEDSLSL | SLARSPEAL  | PAPAHSGMFV | SRLAASGLLL | LSLLALSLDG | KPLKQKWMP  | GPEIPPLEQR |             |            |  |  |  |  |  |  |  |
| 241 | WPGPKVPPLE  | QR         | WPGPEIPP   | LEQRWPGPQI | PPLQK      | WRGP       | LQPEAPPLME | PHQVSRRRAP | PARLAFFPRRG | SRACFGSVLG |  |  |  |  |  |  |  |
| 321 | GGEETGGPFA  | ALGGSGDGDV | GLGSRGGESR | ARSSEGTHP  | IGPSSLGHCS | RGAPGWSEGA | GGWWERTAGP | PLAFFPPCTR |             |            |  |  |  |  |  |  |  |
| 401 | PV          |            |            |            |            |            |            |            |             |            |  |  |  |  |  |  |  |

Supporting Peptides:

| Peptide          | Uniq -10lgP | Mass  | Length    | ppm | m/z | z        | RT | Fraction | Scan | Source File                        | Area F1 | Area F2 | Area F3 | Area F4 | Area F5 | Area F6 |         |
|------------------|-------------|-------|-----------|-----|-----|----------|----|----------|------|------------------------------------|---------|---------|---------|---------|---------|---------|---------|
| R.WPGPQIPPLQK.W  | Y           | 61.81 | 1387.7612 | 12  | 0.7 | 694.8884 | 2  | 49.77    | 5    | F5:14595 17112021_RID_2349_DP5.raw |         |         |         |         |         |         | 3.7975E |
| R.WPGPEIPPLEQR.W | Y           | 57.32 | 1417.7354 | 12  | 0.2 | 709.8751 | 2  | 53.12    | 5    | F5:15698 17112021_RID_2349_DP5.raw |         |         |         |         |         |         | 2.0576E |

total 2 peptides

TRINITY\_DN960  
[back to list](#)

[Protein Coverage](#) | [Supporting Peptides](#) |  
Protein Coverage:

1KKERKKERKKERKKERKKERKKERKKKEAGWGRRRGFSTPTFCQPSPTQSVCKAWDGLPRPWCPAVRGSRA RKARSEEEEE

81EAPAEELRPQSAPSGVPVSPPPRPGEGGPASDGWLDRDGSPLLLPPPPPPA GAEDAVGASPAGRLYKARTA MPPLRANPAR

161QANAAPFGSA VRAFEDSLSL SLARSPEALPAPAHSGMFV SRLAASGLLLLSLLALSLDGKPLKQKWPMGPPEIPPLEQR

241WPGPKVPPLEQRWPGPEIPPLEQRWPGPKVPPLEQRWPGPQIPPLQ QKWRGPLQPE

321APPLMEPHQV SRRRAPPARLAFPRRGSRAFGSVLGGGEE TGGPFALGGSGDGDVGLGSRGESRARS EGTHPIGPS

401SLGHCSRGA GWSEGAGGWERTAGPPLAF FPPCTRPV

Supporting Peptides:

| Peptide          | Uniq | -10lgP | Mass      | Length | ppm | m/z      | z | RT    | Fraction | Scan     | Source File               | Area F1 | Area F2 | Area F3 | Area F4 | Area F  |
|------------------|------|--------|-----------|--------|-----|----------|---|-------|----------|----------|---------------------------|---------|---------|---------|---------|---------|
| R.WPGPQIPPLQK.W  | Y    | 61.81  | 1387.7612 | 12     | 0.7 | 694.8884 | 2 | 49.77 | 5        | F5:14595 | 17112021_RID_2349_DP5.raw |         |         |         |         | 3.7975E |
| R.WPGPEIPPLEQR.W | Y    | 57.32  | 1417.7354 | 12     | 0.2 | 709.8751 | 2 | 53.12 | 5        | F5:15698 | 17112021_RID_2349_DP5.raw |         |         |         |         | 2.0576E |

total 2 peptides

TRINITY\_DN960  
[back to list](#)

[Protein Coverage](#) | [Supporting Peptides](#) |  
Protein Coverage:

1AWDGLPRPWC PAVRGSRAK ARSEEEEEEA PAELRPQSAPSGVPVSPPPRPGEGGPASDGWLDRDGSPLLLPPPPPPAGA

81EDAVGASPAGRLYKARTAMPPLRANPARQANAAPFGSAVR AFEDSLSLSLARSPEALPA PAHSGMFVSR LAASGLLLLLS

161LLALSLDGKPKQKWPMGPPEIPPLEQRWPGPKVPPLEQRWPGPEIPPLEQRWPGPQIPPLQ QKWRGPLQPEAPPLMEPH

241QVSRRRAPPARLAFPRRGSRAACFGSVLGGGEETGGPFALGGSGDGDVGLGSRGGGESRA RSGEGTHPIGPSSSLGHCSR

321GAPGWSEGAGGWERTAGPPLAFPPCTRPV

Supporting Peptides:

| Peptide          | Uniq | -10lgP | Mass      | Length | ppm | m/z      | z | RT    | Fraction | Scan     | Source File               | Area F1 | Area F2 | Area F3 | Area F4 | Area F  |
|------------------|------|--------|-----------|--------|-----|----------|---|-------|----------|----------|---------------------------|---------|---------|---------|---------|---------|
| R.WPGPQIPPLQK.W  | Y    | 61.81  | 1387.7612 | 12     | 0.7 | 694.8884 | 2 | 49.77 | 5        | F5:14595 | 17112021_RID_2349_DP5.raw |         |         |         |         | 3.7975E |
| R.WPGPEIPPLEQR.W | Y    | 57.32  | 1417.7354 | 12     | 0.2 | 709.8751 | 2 | 53.12 | 5        | F5:15698 | 17112021_RID_2349_DP5.raw |         |         |         |         | 2.0576E |

total 2 peptides

TRINITY\_DN960  
[back to list](#)

[Protein Coverage](#) | [Supporting Peptides](#) |  
Protein Coverage:

1MGGQKGFLNPNFLPTFPNSKRLQAWDGLPRPWCPAVRGSRAKARSEEEEE EAPAEELRPQSAPSGVPVSPPPRPGEGGPASDGWLDRDGSPLLLPPPPPPAGAEDAVGAS PAGRLYKARTAMPPLRANPARQANAAPFGSAVR AFEDSLSLSLARSPEALPA PAHSGMFVSR LAASGLLLLLS

81SDGWLDRDGSPLLLPPPPPPAGAEDAVGAS PAGRLYKARTAMPPLRANPARQANAAPFGSAVR AFEDSLSLSLARSPEALPA PAHSGMFVSR LAASGLLLLLS

161LPAPAHSGMFVSR LAASGLLLLSLLALSLDGKPLKQKWPMGPPEIPPLEQRWPGPKVPPLEQRWPGPEIPPLEQRWPGPQIPPLQ QKWRGPLQPEAPPLMEPH

241IPPLQKWRG PLQPEAPPLMEPHQVSRRA PPARLAFPRRGSRAACFGSVLGGGEETGGPFALGGSGDGDVGLGSRGGGESRA RSGEGTHPIGPSSSLGHCSR

321RARS GEGTHPIGPSSSLGHCSRGAAGGWERTAGPPLAFPPCTRPV

Supporting Peptides:

| Peptide          | Uniq | -10lgP | Mass      | Length | ppm | m/z      | z | RT    | Fraction | Scan     | Source File               | Area F1 | Area F2 | Area F3 | Area F4 | Area F  |
|------------------|------|--------|-----------|--------|-----|----------|---|-------|----------|----------|---------------------------|---------|---------|---------|---------|---------|
| R.WPGPQIPPLQK.W  | Y    | 61.81  | 1387.7612 | 12     | 0.7 | 694.8884 | 2 | 49.77 | 5        | F5:14595 | 17112021_RID_2349_DP5.raw |         |         |         |         | 3.7975E |
| R.WPGPEIPPLEQR.W | Y    | 57.32  | 1417.7354 | 12     | 0.2 | 709.8751 | 2 | 53.12 | 5        | F5:15698 | 17112021_RID_2349_DP5.raw |         |         |         |         | 2.0576E |

total 2 peptides

TRINITY\_DN960  
[back to list](#)

[Protein Coverage](#) | [Supporting Peptides](#) |  
Protein Coverage:

1MGGQKGFLNPNFLPTFPNSKRLQAWDGLPRPWCPAVRGSRAKARSEEEEE EAPAEELRPQSAPSGVPVSPPPRPGEGGPASDGWLDRDGSPLLLPPPPPPAGAEDAVGAS PAGRLYKARTAMPPLRANPARQANAAPFGSAVR AFEDSLSLSLARSPEALPA PAHSGMFVSR LAASGLLLLLS

81SDGWLDRDGSPLLLPPPPPPAGAEDAVGAS PAGRLYKARTAMPPLRANPARQANAAPFGSAVR AFEDSLSLSLARSPEALPA PAHSGMFVSR LAASGLLLLLS

161LPAPAHSGMFVSR LAASGLLLLSLLALSLDGKPLKQKWPMGPPEIPPLEQRWPGPKVPPLEQRWPGPEIPPLEQRWPGPQIPPLQ QKWRGPLQPEAPPLMEPH

241VPPLEQRWPGPEIPPLEQRWPGPKVPPLEQRWPGPQIPPLQ QKWRGPLQPEAPPLMEPHQVSRRA PPARLAFPRRGSRAACFGSVLGGGEETGGPFALGGSGDGDVGLGSRGGGESRA RSGEGTHPIGPSSSLGHCSR

321CFGSVLGGGEETGGPFALGGSGDGDVGLGSRGGGESRA RSGEGTHPIGPSSSLGHCSRGAAGGWERTAGPPLAFPPCTRPV

401FFPPCTRPV

Supporting Peptides:

| Peptide         | Uniq | -10lgP | Mass      | Length | ppm | m/z      | z | RT    | Fraction | Scan     | Source File               | Area F1 | Area F2 | Area F3 | Area F4 | Area F  |
|-----------------|------|--------|-----------|--------|-----|----------|---|-------|----------|----------|---------------------------|---------|---------|---------|---------|---------|
| R.WPGPQIPPLQK.W | Y    | 61.81  | 1387.7612 | 12     | 0.7 | 694.8884 | 2 | 49.77 | 5        | F5:14595 | 17112021_RID_2349_DP5.raw |         |         |         |         | 3.7975E |

total 2 peptides

| Peptide          | Uniq -10lgP | Mass  | Length    | ppm | m/z | z        | RT | Fraction | Scan | Source File                        | Area F1 | Area F2 | Area F3 | Area F4 | Area F5 | Area F6 |
|------------------|-------------|-------|-----------|-----|-----|----------|----|----------|------|------------------------------------|---------|---------|---------|---------|---------|---------|
| R.WPGPEIPPLEQR.W | Y           | 57.32 | 1417.7354 | 12  | 0.2 | 709.8751 | 2  | 53.12    | 5    | F5:15698 17112021_RID_2349_DP5.raw |         |         |         |         |         | 2.0576E |
| total 2 peptides |             |       |           |     |     |          |    |          |      |                                    |         |         |         |         |         |         |

TRINITY\_DN672  
[back to list](#)  
| [Protein Coverage](#) | [Supporting Peptides](#) |  
Protein Coverage:

|                      |            |            |            |            |            |             |             |            |  |  |  |  |  |  |  |  |
|----------------------|------------|------------|------------|------------|------------|-------------|-------------|------------|--|--|--|--|--|--|--|--|
| 1                    | QSVAMALNCY | GGLTVLLFCF | GAFSQAQVTQ | NGPVSVDIAG | TTVLTCALQG | VEFISPTNPS  | WYQHKEGKSP  | RLLIYKSRR  |  |  |  |  |  |  |  |  |
| 81                   | ASGTPQRFSA | DTYGNTAKLT | ISSVEVGDEG | DYYCAVWHNN | GFVFGGGTRV | TVTGGQPTVSP | SVQVFAPSPE  | EIRSPNPHTV |  |  |  |  |  |  |  |  |
| 161                  | VCLLSEFYPR | SFVLQWKCD  | KVMTSGVETT | KATKQGDKYL | ASSYLKLSAS | EYEKYGTFTC  | EVOTHERKTIV | KSVSKSGSC  |  |  |  |  |  |  |  |  |
| Supporting Peptides: |            |            |            |            |            |             |             |            |  |  |  |  |  |  |  |  |

| Peptide          | Uniq -10lgP | Mass  | Length    | ppm | m/z  | z        | RT | Fraction | Scan | Source File                        | Area F1 | Area F2 | Area F3 | Area F4 | Area F5 | Area F6 |
|------------------|-------------|-------|-----------|-----|------|----------|----|----------|------|------------------------------------|---------|---------|---------|---------|---------|---------|
| S.VQVFAPSPEIR.S  | Y           | 51.69 | 1370.7194 | 12  | 1.2  | 686.3678 | 2  | 44.58    | 7    | F7:12865 17112021_RID_2349_DP7.raw |         |         |         |         |         |         |
| F.APSPEIR.S      | Y           | 39.94 | 897.4556  | 8   | -0.4 | 449.7349 | 2  | 24.57    | 7    | F7:5992 17112021_RID_2349_DP7.raw  |         |         |         |         |         |         |
| total 2 peptides |             |       |           |     |      |          |    |          |      |                                    |         |         |         |         |         |         |

IOQS  
[back to list](#)  
| [Protein Coverage](#) | [Supporting Peptides](#) |  
Protein Coverage:

|                      |            |            |            |            |            |            |            |           |  |  |  |  |  |  |  |  |
|----------------------|------------|------------|------------|------------|------------|------------|------------|-----------|--|--|--|--|--|--|--|--|
| 1                    | NLFQFARMIN | GKLGAFSVWN | YISYGCYCGW | GGQGTPKDAT | DRCCFVHDCC | YGGVKGCNPK | LAIYSYSFQR | GNIVCGRNG |  |  |  |  |  |  |  |  |
| 81                   | CLRTICECDR | VAANCFHQNK | NTYNKEYKFL | SSSKCRQRSE | QC         |            |            |           |  |  |  |  |  |  |  |  |
| Supporting Peptides: |            |            |            |            |            |            |            |           |  |  |  |  |  |  |  |  |

| Peptide          | Uniq -10lgP | Mass  | Length    | ppm | m/z | z        | RT | Fraction | Scan | Source File                        | Area F1 | Area F2 | Area F3 | Area F4 | Area F5 | Area F6 |
|------------------|-------------|-------|-----------|-----|-----|----------|----|----------|------|------------------------------------|---------|---------|---------|---------|---------|---------|
| K.LAIYSYSFQR.G   | Y           | 68.53 | 1246.6345 | 10  | 0.4 | 624.3248 | 2  | 48.21    | 7    | F7:14191 17112021_RID_2349_DP7.raw |         |         |         |         |         |         |
| NLFQFAR.M        | Y           | 42.54 | 894.4711  | 7   | 0.0 | 448.2429 | 2  | 47.18    | 7    | F7:13859 17112021_RID_2349_DP7.raw |         |         |         |         |         |         |
| total 2 peptides |             |       |           |     |     |          |    |          |      |                                    |         |         |         |         |         |         |

IOQS  
[back to list](#)  
| [Protein Coverage](#) | [Supporting Peptides](#) |  
Protein Coverage:

|                      |            |            |            |            |            |            |            |           |  |  |  |  |  |  |  |  |
|----------------------|------------|------------|------------|------------|------------|------------|------------|-----------|--|--|--|--|--|--|--|--|
| 1                    | NLFQFARMIN | GKLGAFSVWN | YISYGCYCGW | GGQGTPKDAT | DRCCFVHDCC | YGGVKGCNPK | LAIYSYSFQR | GNIVCGRNG |  |  |  |  |  |  |  |  |
| 81                   | CLRTICECDR | VAANCFHQNK | NTYNKEYKFL | SSSKCRQRSE | QC         |            |            |           |  |  |  |  |  |  |  |  |
| Supporting Peptides: |            |            |            |            |            |            |            |           |  |  |  |  |  |  |  |  |

| Peptide          | Uniq -10lgP | Mass  | Length    | ppm | m/z | z        | RT | Fraction | Scan | Source File                        | Area F1 | Area F2 | Area F3 | Area F4 | Area F5 | Area F6 |
|------------------|-------------|-------|-----------|-----|-----|----------|----|----------|------|------------------------------------|---------|---------|---------|---------|---------|---------|
| K.LAIYSYSFQR.G   | Y           | 68.53 | 1246.6345 | 10  | 0.4 | 624.3248 | 2  | 48.21    | 7    | F7:14191 17112021_RID_2349_DP7.raw |         |         |         |         |         |         |
| NLFQFAR.M        | Y           | 42.54 | 894.4711  | 7   | 0.0 | 448.2429 | 2  | 47.18    | 7    | F7:13859 17112021_RID_2349_DP7.raw |         |         |         |         |         |         |
| total 2 peptides |             |       |           |     |     |          |    |          |      |                                    |         |         |         |         |         |         |

IOQS  
[back to list](#)  
| [Protein Coverage](#) | [Supporting Peptides](#) |  
Protein Coverage:

|                      |            |            |            |            |            |            |            |           |  |  |  |  |  |  |  |  |
|----------------------|------------|------------|------------|------------|------------|------------|------------|-----------|--|--|--|--|--|--|--|--|
| 1                    | NLFQFARMIN | GKLGAFSVWN | YISYGCYCGW | GGQGTPKDAT | DRCCFVHDCC | YGGVKGCNPK | LAIYSYSFQR | GNIVCGRNG |  |  |  |  |  |  |  |  |
| 81                   | CLRTICECDR | VAANCFHQNK | NTYNKEYKFL | SSSKCRQRSE | QC         |            |            |           |  |  |  |  |  |  |  |  |
| Supporting Peptides: |            |            |            |            |            |            |            |           |  |  |  |  |  |  |  |  |

| Peptide          | Uniq -10lgP | Mass  | Length    | ppm | m/z | z        | RT | Fraction | Scan | Source File                        | Area F1 | Area F2 | Area F3 | Area F4 | Area F5 | Area F6 |
|------------------|-------------|-------|-----------|-----|-----|----------|----|----------|------|------------------------------------|---------|---------|---------|---------|---------|---------|
| K.LAIYSYSFQR.G   | Y           | 68.53 | 1246.6345 | 10  | 0.4 | 624.3248 | 2  | 48.21    | 7    | F7:14191 17112021_RID_2349_DP7.raw |         |         |         |         |         |         |
| NLFQFAR.M        | Y           | 42.54 | 894.4711  | 7   | 0.0 | 448.2429 | 2  | 47.18    | 7    | F7:13859 17112021_RID_2349_DP7.raw |         |         |         |         |         |         |
| total 2 peptides |             |       |           |     |     |          |    |          |      |                                    |         |         |         |         |         |         |

IOQS  
[back to list](#)  
| [Protein Coverage](#) | [Supporting Peptides](#) |  
Protein Coverage:

1

NLFQFARMIN

GKLGAFSVWN

YISYGCYCGW

GGQGTKDAT

DRCCFVHDCC

YGGVKGKNPK

LAIYSYSFQR

GNIVCGRNNG

81

CLRTICECDR

VAANCFHQNK

NTYNKEYKFL

SSSKCRQRSE

QC

Supporting Peptides:

| Peptide        | Uniq | -10lgP | Mass      | Length | ppm | m/z      | z | RT    | Fraction | Scan     | Source File               | Area F1 | Area F2 | Area F3 | Area F4 | Area F5 | Area F6 |
|----------------|------|--------|-----------|--------|-----|----------|---|-------|----------|----------|---------------------------|---------|---------|---------|---------|---------|---------|
| K.LAIYSYSFQR.G | Y    | 68.53  | 1246.6345 | 10     | 0.4 | 624.3248 | 2 | 48.21 | 7        | F7:14191 | 17112021_RID_2349_DP7.raw |         |         |         |         |         |         |
| NLFQFAR.M      | Y    | 42.54  | 894.4711  | 7      | 0.0 | 448.2429 | 2 | 47.18 | 7        | F7:13859 | 17112021_RID_2349_DP7.raw |         |         |         |         |         |         |

total 2 peptides

CAA48456.1

[back to list](#)

| [Protein Coverage](#) | [Supporting Peptides](#) |

Protein Coverage:

1

MRTLWIVAVC

LIGVEG

NLFQ FARM

INGKLG

AFSVWNYISY

GCYCGWGGQG

TPKDATDRCC

FVHDCCYGGV

KGCNPK

LAIY

81

SYSFQR

GNIV

CGRNNGCLRT

ICECDRVAAN

CFHQNKNTYN

KEYKFLSSSK

CRQRSEQC

Supporting Peptides:

| Peptide        | Uniq | -10lgP | Mass      | Length | ppm | m/z      | z | RT    | Fraction | Scan     | Source File               | Area F1 | Area F2 | Area F3 | Area F4 | Area F5 | Area F6 |
|----------------|------|--------|-----------|--------|-----|----------|---|-------|----------|----------|---------------------------|---------|---------|---------|---------|---------|---------|
| K.LAIYSYSFQR.G | Y    | 68.53  | 1246.6345 | 10     | 0.4 | 624.3248 | 2 | 48.21 | 7        | F7:14191 | 17112021_RID_2349_DP7.raw |         |         |         |         |         |         |
| G.NLFQFAR.M    | Y    | 42.54  | 894.4711  | 7      | 0.0 | 448.2429 | 2 | 47.18 | 7        | F7:13859 | 17112021_RID_2349_DP7.raw |         |         |         |         |         |         |

total 2 peptides

AAZ53185.1

[back to list](#)

| [Protein Coverage](#) | [Supporting Peptides](#) |

Protein Coverage:

1

MRTLWILAVC

LIGVEG

NLFQ FARM

INGKLG

AFSVWNYISY

GCYCGWGGQG

TPKDATDRCC

FVHDCCYGGV

KGCNPK

LAIY

81

SYSFQR

GNIV

CGRNNGCLRT

ICECDRVAAN

CFHQNKNTYN

KRYKFLSSYY

CRQTSEKC

Supporting Peptides:

| Peptide        | Uniq | -10lgP | Mass      | Length | ppm | m/z      | z | RT    | Fraction | Scan     | Source File               | Area F1 | Area F2 | Area F3 | Area F4 | Area F5 | Area F6 |
|----------------|------|--------|-----------|--------|-----|----------|---|-------|----------|----------|---------------------------|---------|---------|---------|---------|---------|---------|
| K.LAIYSYSFQR.G | Y    | 68.53  | 1246.6345 | 10     | 0.4 | 624.3248 | 2 | 48.21 | 7        | F7:14191 | 17112021_RID_2349_DP7.raw |         |         |         |         |         |         |
| G.NLFQFAR.M    | Y    | 42.54  | 894.4711  | 7      | 0.0 | 448.2429 | 2 | 47.18 | 7        | F7:13859 | 17112021_RID_2349_DP7.raw |         |         |         |         |         |         |

total 2 peptides

Q02471.1

[back to list](#)

| [Protein Coverage](#) | [Supporting Peptides](#) |

Protein Coverage:

1

MRTLWIVAVC

LIGVEG

NLFQ FARM

INGKLG

AFSVWNYISY

GCYCGWGGQG

TPKDATDRCC

FVHDCCYGGV

KGCNPK

LAIY

81

SYSFQR

GNIV

CGRNNGCLRT

ICECDRVAAN

CFHQNKNTYN

KEYKFLSSSK

CRQRSEQC

Supporting Peptides:

| Peptide        | Uniq | -10lgP | Mass      | Length | ppm | m/z      | z | RT    | Fraction | Scan     | Source File               | Area F1 | Area F2 | Area F3 | Area F4 | Area F5 | Area F6 |
|----------------|------|--------|-----------|--------|-----|----------|---|-------|----------|----------|---------------------------|---------|---------|---------|---------|---------|---------|
| K.LAIYSYSFQR.G | Y    | 68.53  | 1246.6345 | 10     | 0.4 | 624.3248 | 2 | 48.21 | 7        | F7:14191 | 17112021_RID_2349_DP7.raw |         |         |         |         |         |         |
| G.NLFQFAR.M    | Y    | 42.54  | 894.4711  | 7      | 0.0 | 448.2429 | 2 | 47.18 | 7        | F7:13859 | 17112021_RID_2349_DP7.raw |         |         |         |         |         |         |

total 2 peptides

S29298

[back to list](#)

| [Protein Coverage](#) | [Supporting Peptides](#) |

Protein Coverage:

1

MRTLWIVAVC

LIGVEG

NLFQ FARM

INGKLG

AFSVWNYISY

GCYCGWGGQG

TPKDATDRCC

FVHDCCYGGV

KGCNPK

LAIY

81

SYSFQR

GNIV

CGRNNGCLRT

ICECDRVAAN

CFHQNKNTYN

KEYKFLSSSK

CRQRSEQC

Supporting Peptides:

| Peptide        | Uniq | -10lgP | Mass      | Length | ppm | m/z      | z | RT    | Fraction | Scan     | Source File               | Area F1 | Area F2 | Area F3 | Area F4 | Area F5 | Area F6 |
|----------------|------|--------|-----------|--------|-----|----------|---|-------|----------|----------|---------------------------|---------|---------|---------|---------|---------|---------|
| K.LAIYSYSFQR.G | Y    | 68.53  | 1246.6345 | 10     | 0.4 | 624.3248 | 2 | 48.21 | 7        | F7:14191 | 17112021_RID_2349_DP7.raw |         |         |         |         |         |         |
| G.NLFQFAR.M    | Y    | 42.54  | 894.4711  | 7      | 0.0 | 448.2429 | 2 | 47.18 | 7        | F7:13859 | 17112021_RID_2349_DP7.raw |         |         |         |         |         |         |

total 2 peptides

file:///C:/Users/senra/AppData/Local/Temp/Rar\$EXa4564.42349/Supplementary File S1/protein.html

179/224

ACD43467.1  
[back to list](#)

[Protein Coverage](#) | [Supporting Peptides](#) |  
Protein Coverage:

1   MRTLWIVAVC   LIGVEG**NLFQ FARM**INGKLG   AFSVWNYISY   GCYCGWGGQG   TPKDATDRCC   FVHDCCYGGV   KGCNPK**LAIY**

81   **SYSFQR**GNIV   CGRNNGCLRT   ICECDRVAAN   CFHQNKNTYN   KEYKFLSSSK   CRQRSEQC

Supporting Peptides:

| Peptide          | Uniq -10lgP | Mass  | Length    | ppm | m/z | z        | RT      | Fraction | Scan     | Source File               | Area F1 | Area F2 | Area F3 | Area F4 | Area F5 | Area F6 |
|------------------|-------------|-------|-----------|-----|-----|----------|---------|----------|----------|---------------------------|---------|---------|---------|---------|---------|---------|
| K.LAIYSYSFQR.G   | Y           | 68.53 | 1246.6345 | 10  | 0.4 | 624.3248 | 2 48.21 | 7        | F7:14191 | 17112021_RID_2349_DP7.raw |         |         |         |         |         |         |
| G.NLFQFAR.M      | Y           | 42.54 | 894.4711  | 7   | 0.0 | 448.2429 | 2 47.18 | 7        | F7:13859 | 17112021_RID_2349_DP7.raw |         |         |         |         |         |         |
| total 2 peptides |             |       |           |     |     |          |         |          |          |                           |         |         |         |         |         |         |

ACD43465.1  
[back to list](#)

[Protein Coverage](#) | [Supporting Peptides](#) |  
Protein Coverage:

1   MRTLWIVAVC   LIGVEG**NLFQ FARM**INGKLG   AFSVWNYISY   GCYCGWGGQG   TPKDATDRCC   FVHDCCYGGV   KGCNPK**LAIY**

81   **SYSFQR**GNIV   CGRNNGCLRT   ICECDRVAAN   CFHQNKNTYN   KEYKFLSSSK   CRQRSEQC

Supporting Peptides:

| Peptide          | Uniq -10lgP | Mass  | Length    | ppm | m/z | z        | RT      | Fraction | Scan     | Source File               | Area F1 | Area F2 | Area F3 | Area F4 | Area F5 | Area F6 |
|------------------|-------------|-------|-----------|-----|-----|----------|---------|----------|----------|---------------------------|---------|---------|---------|---------|---------|---------|
| K.LAIYSYSFQR.G   | Y           | 68.53 | 1246.6345 | 10  | 0.4 | 624.3248 | 2 48.21 | 7        | F7:14191 | 17112021_RID_2349_DP7.raw |         |         |         |         |         |         |
| G.NLFQFAR.M      | Y           | 42.54 | 894.4711  | 7   | 0.0 | 448.2429 | 2 47.18 | 7        | F7:13859 | 17112021_RID_2349_DP7.raw |         |         |         |         |         |         |
| total 2 peptides |             |       |           |     |     |          |         |          |          |                           |         |         |         |         |         |         |

AFD04723.1  
[back to list](#)

[Protein Coverage](#) | [Supporting Peptides](#) |  
Protein Coverage:

1   MSSGGLLLLL   GLLTLWAE**LT**   PISGQDRPKF   CNLAPESGRC   RGHLR**RIYYN PDSNK**CEVFF   YGGCGGNDNN   FETRKKCRQT

81   CGAPRKGRPT

Supporting Peptides:

| Peptide          | Uniq -10lgP | Mass  | Length    | ppm | m/z  | z        | RT      | Fraction | Scan    | Source File               | Area F1 | Area F2 | Area F3 | Area F4  | Area F5  | Area F6 |
|------------------|-------------|-------|-----------|-----|------|----------|---------|----------|---------|---------------------------|---------|---------|---------|----------|----------|---------|
| R.IYYNPDSNK.C    | Y           | 52.18 | 1112.5138 | 9   | -0.5 | 557.2639 | 2 26.99 | 7        | F7:6866 | 17112021_RID_2349_DP7.raw |         |         |         | 8.1126E5 | 8.8307E5 |         |
| R.RIYYNPDSNK.C   | Y           | 51.68 | 1268.6149 | 10  | -0.6 | 635.3143 | 2 23.49 | 7        | F7:5623 | 17112021_RID_2349_DP7.raw |         |         |         |          |          |         |
| total 2 peptides |             |       |           |     |      |          |         |          |         |                           |         |         |         |          |          |         |

AFB74191.1  
[back to list](#)

[Protein Coverage](#) | [Supporting Peptides](#) |  
Protein Coverage:

1   MSSGGLLLLL   GLLTLWAE**LT**   PISGQDRPKF   CNLAPESGRC   RGHLR**RIYYN PDSNK**CEVFF   YGGCGGNDNN   FETRKKCRQT

81   CGAPRKGRPT

Supporting Peptides:

| Peptide          | Uniq -10lgP | Mass  | Length    | ppm | m/z  | z        | RT      | Fraction | Scan    | Source File               | Area F1 | Area F2 | Area F3 | Area F4  | Area F5  | Area F6 |
|------------------|-------------|-------|-----------|-----|------|----------|---------|----------|---------|---------------------------|---------|---------|---------|----------|----------|---------|
| R.IYYNPDSNK.C    | Y           | 52.18 | 1112.5138 | 9   | -0.5 | 557.2639 | 2 26.99 | 7        | F7:6866 | 17112021_RID_2349_DP7.raw |         |         |         | 8.1126E5 | 8.8307E5 |         |
| R.RIYYNPDSNK.C   | Y           | 51.68 | 1268.6149 | 10  | -0.6 | 635.3143 | 2 23.49 | 7        | F7:5623 | 17112021_RID_2349_DP7.raw |         |         |         |          |          |         |
| total 2 peptides |             |       |           |     |      |          |         |          |         |                           |         |         |         |          |          |         |

A8Y7N4.1  
[back to list](#)

[Protein Coverage](#) | [Supporting Peptides](#) |  
Protein Coverage:

1   MSSGGLLLLL   GLLTLWAE**LT**   PISGQDRPKF   CNLAPESGRC   RGHLR**RIYYN PDSNK**CEVFF   YGGCGGNDNN   FETRKKCRQT

81   CGAPRKGRPT

Supporting Peptides:

| Peptide | Uniq -10lgP | Mass | Length | ppm | m/z | z | RT | Fraction | Scan | Source File | Area F1 | Area F2 | Area F3 | Area F4 | Area F5 | Area F6 |
|---------|-------------|------|--------|-----|-----|---|----|----------|------|-------------|---------|---------|---------|---------|---------|---------|
|---------|-------------|------|--------|-----|-----|---|----|----------|------|-------------|---------|---------|---------|---------|---------|---------|

| Peptide        | Uniq -10lgP | Mass  | Length    | ppm | m/z  | z        | RT | Fraction | Scan | Source File                       | Area F1 | Area F2 | Area F3 | Area F4  | Area F5  |
|----------------|-------------|-------|-----------|-----|------|----------|----|----------|------|-----------------------------------|---------|---------|---------|----------|----------|
| R.IYYNPDSNK.C  | Y           | 52.18 | 1112.5138 | 9   | -0.5 | 557.2639 | 2  | 26.99    | 7    | F7:6866 17112021_RID_2349_DP7.raw |         |         |         | 8.1126E5 | 8.8307E5 |
| R.RIYYNPDSNK.C | Y           | 51.68 | 1268.6149 | 10  | -0.6 | 635.3143 | 2  | 23.49    | 7    | F7:5623 17112021_RID_2349_DP7.raw |         |         |         |          |          |

total 2 peptides

H6VC05.1  
[back to list](#)

| [Protein Coverage](#) | [Supporting Peptides](#) |  
Protein Coverage:

1 MSSGGLLLLL GLLTLWAELT PISGQDRPKF CNLAPESGRC RGHLRRIYYN PDSNKCEVFF YGGCGGNDNN FETRKKCRQT

81 CGAPRKGRPT

Supporting Peptides:

| Peptide        | Uniq -10lgP | Mass  | Length    | ppm | m/z  | z        | RT | Fraction | Scan | Source File                       | Area F1 | Area F2 | Area F3 | Area F4  | Area F5  |
|----------------|-------------|-------|-----------|-----|------|----------|----|----------|------|-----------------------------------|---------|---------|---------|----------|----------|
| R.IYYNPDSNK.C  | Y           | 52.18 | 1112.5138 | 9   | -0.5 | 557.2639 | 2  | 26.99    | 7    | F7:6866 17112021_RID_2349_DP7.raw |         |         |         | 8.1126E5 | 8.8307E5 |
| R.RIYYNPDSNK.C | Y           | 51.68 | 1268.6149 | 10  | -0.6 | 635.3143 | 2  | 23.49    | 7    | F7:5623 17112021_RID_2349_DP7.raw |         |         |         |          |          |

total 2 peptides

CAL69602.1  
[back to list](#)

| [Protein Coverage](#) | [Supporting Peptides](#) |  
Protein Coverage:

1 MSSGGLLLLL GLLTLWAEPT PISGQDRPKF CNLAPESGRC RGHLRRIYYN PDSNKCEVFF YGGCGGNDNN FETRKKCRQT

81 CGAPRKGRPT

Supporting Peptides:

| Peptide        | Uniq -10lgP | Mass  | Length    | ppm | m/z  | z        | RT | Fraction | Scan | Source File                       | Area F1 | Area F2 | Area F3 | Area F4  | Area F5  |
|----------------|-------------|-------|-----------|-----|------|----------|----|----------|------|-----------------------------------|---------|---------|---------|----------|----------|
| R.IYYNPDSNK.C  | Y           | 52.18 | 1112.5138 | 9   | -0.5 | 557.2639 | 2  | 26.99    | 7    | F7:6866 17112021_RID_2349_DP7.raw |         |         |         | 8.1126E5 | 8.8307E5 |
| R.RIYYNPDSNK.C | Y           | 51.68 | 1268.6149 | 10  | -0.6 | 635.3143 | 2  | 23.49    | 7    | F7:5623 17112021_RID_2349_DP7.raw |         |         |         |          |          |

total 2 peptides

ABD24041.1  
[back to list](#)

| [Protein Coverage](#) | [Supporting Peptides](#) |  
Protein Coverage:

1 MSSGGLLLLL GLLTLWAEPT PISGQDRPKF CFLRPDFGRY GHPRPRFYYN PATNQCGFL AQR SRENTNN FDTRDKCRQT

81 CGRK

Supporting Peptides:

| Peptide           | Uniq -10lgP | Mass  | Length    | ppm | m/z  | z        | RT | Fraction | Scan | Source File                        | Area F1  | Area F2 | Area F3 | Area F4  |
|-------------------|-------------|-------|-----------|-----|------|----------|----|----------|------|------------------------------------|----------|---------|---------|----------|
| R.FYYNPATNQ.C     | Y           | 53.01 | 1116.4875 | 9   | 0.4  | 559.2513 | 2  | 42.16    | 7    | F7:12041 17112021_RID_2349_DP7.raw | 1.5234E5 |         |         |          |
| R.SRENTNNFDTRDK.C | Y           | 41.21 | 1595.7288 | 13  | 0.2  | 532.9170 | 3  | 18.70    | 1    | F1:4666 12112021_RID_2349_DP1.raw  | 1.8585E5 |         |         |          |
| R.SRENTNNFDTR.D   | Y           | 39.27 | 1352.6069 | 11  | -0.4 | 451.8761 | 3  | 17.84    | 2    | F2:3446 12112021_RID_2349_DP2.raw  |          |         |         | 1.6087E5 |

total 3 peptides

Q2ES49.1  
[back to list](#)

| [Protein Coverage](#) | [Supporting Peptides](#) |  
Protein Coverage:

1 MSSGGLLLLL GLLTLWAEPT PISGQDRPKF CFLRPDFGRY GHPRPRFYYN PATNQCGFL AQR SRENTNN FDTRDKCRQT

81 CGRK

Supporting Peptides:

| Peptide           | Uniq -10lgP | Mass  | Length    | ppm | m/z  | z        | RT | Fraction | Scan | Source File                        | Area F1  | Area F2 | Area F3 | Area F4  |
|-------------------|-------------|-------|-----------|-----|------|----------|----|----------|------|------------------------------------|----------|---------|---------|----------|
| R.FYYNPATNQ.C     | Y           | 53.01 | 1116.4875 | 9   | 0.4  | 559.2513 | 2  | 42.16    | 7    | F7:12041 17112021_RID_2349_DP7.raw | 1.5234E5 |         |         |          |
| R.SRENTNNFDTRDK.C | Y           | 41.21 | 1595.7288 | 13  | 0.2  | 532.9170 | 3  | 18.70    | 1    | F1:4666 12112021_RID_2349_DP1.raw  | 1.8585E5 |         |         |          |
| R.SRENTNNFDTR.D   | Y           | 39.27 | 1352.6069 | 11  | -0.4 | 451.8761 | 3  | 17.84    | 2    | F2:3446 12112021_RID_2349_DP2.raw  |          |         |         | 1.6087E5 |

total 3 peptides

TRINITY\_DN157

[back to list](#)

[Protein Coverage](#) | [Supporting Peptides](#) |

Protein Coverage:

|    |            |            |                 |            |            |            |            |            |         |            |                |     |
|----|------------|------------|-----------------|------------|------------|------------|------------|------------|---------|------------|----------------|-----|
| 1  | MVHWTAEER  | <b>S</b>   | <b>TITAVWSK</b> | V          | VPAVGAEALS | NLLIVCPWTQ | RFFPNFGNLS | NAAAIQSNAQ | VKAHGKK | <b>VFT</b> | <b>AFGDAVK</b> | NPE |
| 81 | GVKDTFAKLS | ELHCDKLHVD | PVNFKLLGDS      | LITVLAAHFG | KEFTPHVQAC | FQKLVAVVAH | ALAHRYH    |            |         |            |                |     |

Supporting Peptides:

| Peptide        | Uniq | -10lgP | Mass      | Length | ppm | m/z      | z | RT    | Fraction | Scan     | Source File               | Area F1 | Area F2 | Area F3 | Area F4 | Area F5 | Area F6 |
|----------------|------|--------|-----------|--------|-----|----------|---|-------|----------|----------|---------------------------|---------|---------|---------|---------|---------|---------|
| K.STITAVWSK.V  | Y    | 55.57  | 991.5338  | 9      | 0.2 | 496.7743 | 2 | 39.29 | 7        | F7:11035 | 17112021_RID_2349_DP7.raw |         |         |         |         |         |         |
| K.VFTAFGDAVK.N | N    | 40.99  | 1053.5494 | 10     | 0.9 | 527.7825 | 2 | 44.38 | 7        | F7:12863 | 17112021_RID_2349_DP7.raw |         |         |         |         |         |         |

total 2 peptides

AAB36402.1

[back to list](#)

[Protein Coverage](#) | [Supporting Peptides](#) |

Protein Coverage:

|    |            |            |            |              |          |          |          |          |       |          |          |          |          |          |          |          |          |         |       |       |            |           |   |
|----|------------|------------|------------|--------------|----------|----------|----------|----------|-------|----------|----------|----------|----------|----------|----------|----------|----------|---------|-------|-------|------------|-----------|---|
| 1  | DCSSGWTAYG | KHCYKVFDEP | <b>K</b>   | <b>TWEDA</b> | <b>E</b> | <b>K</b> | <b>F</b> | <b>C</b> | SEQAN | <b>G</b> | <b>G</b> | <b>H</b> | <b>L</b> | <b>V</b> | <b>S</b> | <b>F</b> | <b>R</b> | SSKEADF | VVTLT | AQTKE | SEIVVMGLSK | IWNQCDWGW | T |
| 81 | NGAKLNYEAW | AEAESYCVWF | SSTNKEWKSR | PCSLFGHFVC   | KSPAW    |          |          |          |       |          |          |          |          |          |          |          |          |         |       |       |            |           |   |

Supporting Peptides:

| Peptide        | Uniq | -10lgP | Mass      | Length | ppm  | m/z      | z | RT    | Fraction | Scan     | Source File               | Area F1 | Area F2 | Area F3 | Area F4 | Area F5 | Area F6 | A   |
|----------------|------|--------|-----------|--------|------|----------|---|-------|----------|----------|---------------------------|---------|---------|---------|---------|---------|---------|-----|
| K.TWEDA.EK.F   | N    | 42.92  | 877.3817  | 7      | 0.0  | 439.6982 | 2 | 23.16 | 7        | F7:5532  | 17112021_RID_2349_DP7.raw |         |         |         |         |         |         | 0   |
| N.GGHLVSFR.S   | Y    | 42.19  | 871.4664  | 8      | 0.1  | 436.7405 | 2 | 27.12 | 7        | F7:6878  | 17112021_RID_2349_DP7.raw |         |         |         |         |         |         | 3.9 |
| K.TWEDA.EK.F.C | N    | 40.38  | 1024.4502 | 8      | -0.9 | 513.2319 | 2 | 40.86 | 7        | F7:11654 | 17112021_RID_2349_DP7.raw |         |         |         |         |         |         | 9.4 |

total 3 peptides

Q9PSM8.1

[back to list](#)

[Protein Coverage](#) | [Supporting Peptides](#) |

Protein Coverage:

|    |            |            |            |              |          |          |          |          |       |          |          |          |          |          |          |          |          |         |       |       |            |           |   |
|----|------------|------------|------------|--------------|----------|----------|----------|----------|-------|----------|----------|----------|----------|----------|----------|----------|----------|---------|-------|-------|------------|-----------|---|
| 1  | DCSSGWTAYG | KHCYKVFDEP | <b>K</b>   | <b>TWEDA</b> | <b>E</b> | <b>K</b> | <b>F</b> | <b>C</b> | SEQAN | <b>G</b> | <b>G</b> | <b>H</b> | <b>L</b> | <b>V</b> | <b>S</b> | <b>F</b> | <b>R</b> | SSKEADF | VVTLT | AQTKE | SEIVVMGLSK | IWNQCDWGW | T |
| 81 | NGAKLNYEAW | AEAESYCVWF | SSTNKEWKSR | PCSLFGHFVC   | KSPAW    |          |          |          |       |          |          |          |          |          |          |          |          |         |       |       |            |           |   |

Supporting Peptides:

| Peptide        | Uniq | -10lgP | Mass      | Length | ppm  | m/z      | z | RT    | Fraction | Scan     | Source File               | Area F1 | Area F2 | Area F3 | Area F4 | Area F5 | Area F6 | A   |
|----------------|------|--------|-----------|--------|------|----------|---|-------|----------|----------|---------------------------|---------|---------|---------|---------|---------|---------|-----|
| K.TWEDA.EK.F   | N    | 42.92  | 877.3817  | 7      | 0.0  | 439.6982 | 2 | 23.16 | 7        | F7:5532  | 17112021_RID_2349_DP7.raw |         |         |         |         |         |         | 0   |
| N.GGHLVSFR.S   | Y    | 42.19  | 871.4664  | 8      | 0.1  | 436.7405 | 2 | 27.12 | 7        | F7:6878  | 17112021_RID_2349_DP7.raw |         |         |         |         |         |         | 3.9 |
| K.TWEDA.EK.F.C | N    | 40.38  | 1024.4502 | 8      | -0.9 | 513.2319 | 2 | 40.86 | 7        | F7:11654 | 17112021_RID_2349_DP7.raw |         |         |         |         |         |         | 9.4 |

total 3 peptides

XP\_029141923.1

[back to list](#)

[Protein Coverage](#) | [Supporting Peptides](#) |

Protein Coverage:

|     |           |              |                |            |             |            |            |            |            |            |          |          |          |      |        |         |     |         |     |            |        |      |           |
|-----|-----------|--------------|----------------|------------|-------------|------------|------------|------------|------------|------------|----------|----------|----------|------|--------|---------|-----|---------|-----|------------|--------|------|-----------|
| 1   | MVPWLNLSL | LVVLRGVQSE   | VQLVESGGEG     | RRPGESLHLS | CQSGSGFTFGN | YWMVVRQAP  | GKGLECVLVF | KGYQYGCHMV |            |            |          |          |          |      |        |         |     |         |     |            |        |      |           |
| 81  | RMERIRS   | VST          | ESTEFYFTNS     | SFIRAE     | LHIT        | PYEYLLDLRK | QVEIMLSACL | NIFPSVRILH | TFERAKMALW | LNIMFLLVL  |          |          |          |      |        |         |     |         |     |            |        |      |           |
| 161 | GGAQS     | <b>EVQLV</b> | <b>ETGGDVR</b> | RP         | G           | ESLRLSCQAS | GFTFSSSWMS | WVRQAPGKGL | EWVARIRYDS | ATIYYPDKVK | GRFTISR  | DNA      |          |      |        |         |     |         |     |            |        |      |           |
| 241 | <b>K</b>  | <b>S</b>     | <b>Q</b>       | <b>L</b>   | <b>Y</b>    | <b>L</b>   | <b>Q</b>   | <b>M</b>   | <b>N</b>   | <b>S</b>   | <b>L</b> | <b>K</b> | AEDTAVYY | CVRD | TMVYPD | VYWFSSQ | GNT | NMRWAIF | SMS | AMEDEGTLET | QSSVYL | FYPE | GYNSVTASC |

Supporting Peptides:

| Peptide                 | Uniq | -10lgP | Mass      | Length | ppm | m/z      | z | RT    | Fraction | Scan     | Source File               | Area F1 | Area F2 | Area F3 | Area F4 | Area F5 | Area F6 | A |
|-------------------------|------|--------|-----------|--------|-----|----------|---|-------|----------|----------|---------------------------|---------|---------|---------|---------|---------|---------|---|
| K.SQLYLQMNSLK.A         | N    | 55.00  | 1323.6857 | 11     | 0.6 | 662.8505 | 2 | 45.98 | 7        | F7:13334 | 17112021_RID_2349_DP7.raw |         |         |         |         |         |         |   |
| S.EVQLVETGGDVR.R        | Y    | 53.24  | 1300.6622 | 12     | 0.4 | 651.3386 | 2 | 35.98 | 7        | F7:9917  | 17112021_RID_2349_DP7.raw |         |         |         |         |         |         |   |
| K.SQLYLQM(+15.99)NSLK.A | N    | 41.82  | 1339.6805 | 11     | 0.6 | 670.8480 | 2 | 37.34 | 7        | F7:10474 | 17112021_RID_2349_DP7.raw |         |         |         |         |         |         |   |

total 3 peptides

TRINITY\_DN1424

[back to list](#)

[Protein Coverage](#) | [Supporting Peptides](#)

Protein Coverage:

1 GRLARGGRM LAARRALWPG WRGWSCERRK MKLLAAAAALL GLGGGLMLL LPGTRAEEK KGPKVTVKVQ FDKIGIEEV  
81 GRIVIGLFGK TVPK**TVENFV** **ALT**TGEKGFG FKGSKFHRII KDFMIQGGDF TRGDGTGGKS IYGDRFPDEN FKLKHYGPW  
161 VSMANAGKDT NGSQFFITTV KTSWLDGKHV VFGKVLEGM VVRKMESTKT DSRDKPLKDV IADCNVIEV EKPFAIAKE

Supporting Peptides:

| Peptide             | Uniq -10lgP | Mass      | Length | ppm | m/z      | z | RT    | Fraction | Scan     | Source File               | Area F1 | Area F2 | Area F3 | Area F4 | Area Total |
|---------------------|-------------|-----------|--------|-----|----------|---|-------|----------|----------|---------------------------|---------|---------|---------|---------|------------|
| K.TVENFVALTTGEK.G Y | 65.95       | 1407.7245 | 13     | 0.5 | 704.8699 | 2 | 47.57 | 7        | F7:13936 | 17112021_RID_2349_DP7.raw |         |         |         |         | 6.0446     |

**total 1 peptides**

ART88739.1

[back to list](#)

[Protein Coverage](#) | [Supporting Peptides](#)

Protein Coverage:

1 MVLIRVLANL LILQLSYAQR SSELVAGGDE CNINEHRSVL VLFNSSGFLC GGTLINQEWV LTAAHCDSKN FQMQLGVHSK 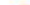 C

81 KVLNDDEQTR DPKEKFLCLG RKNEK**DKDIM LIR**LNSPVHE STHIAPVSLP SSSPTVGSVC R**IMGWGLTTP**TKETYPDVPN

161 CANINILDHA VCQRAYPGLL VKSRTLCAGI LKGGKDTCVG DSGGPLICNG QFQGIVSWG GHPCAEPLRPG VYTTVFYDND

241 WIKSIIAGNT AATCPP

### Supporting Peptides:

| Peptide              | Uniq | -10lgP | Mass      | Length | ppm  | m/z      | z | RT    | Fraction | Scan     | Source File               | Area F1 | Area F2 | Area F3  | Area F4 |
|----------------------|------|--------|-----------|--------|------|----------|---|-------|----------|----------|---------------------------|---------|---------|----------|---------|
| R.IMGWGLTTPTK.E      | Y    | 45.69  | 1203.6322 | 11     | 0.2  | 602.8235 | 2 | 49.32 | 2        | F2:14064 | 12112021_RID_2349_DP2.raw |         | 1.254E5 |          |         |
| K.DKDIMLIR.L         | N    | 44.22  | 1002.5532 | 8      | -0.5 | 502.2836 | 2 | 37.38 | 3        | F3:10341 | 17112021_RID_2349_DP3.raw |         |         | 5.8616E6 |         |
| K.DKDIM(+15.99)LIR.L | N    | 39.37  | 1018.5481 | 8      | 0.3  | 510.2815 | 2 | 31.54 | 3        | F3:8358  | 17112021_RID_2349_DP3.raw |         |         | 1.7097E6 |         |

**total 3 peptides**

TRINITY DN1526

[back to list](#)

[Protein Coverage](#) | [Supporting Peptides](#)

Protein Coverage:

1 LGLSREQLQG GVSAKKGGRG RKGRREKGRG ECTKQTPTPG YLAVRAPVER RQTFSGSPGL HSRVMDPCRR KQIRWRTTLL  
81 QQCVLLLTIV VIILEAVPID VDKTKVQEQE KDSATVDNPE TGLYDAYLR QVIEVLETD HFREKLQTTN VEDIKNGKLS  
161 **KELDLVGHKV** RTKLDELKRQ EVARLRMLIK **AKMDAYQDSG IDHQALLK**QF EHLNHHNPHT FEVKDLDMI KAATHDLENY  
241 DNTRHEEFKK YEMMKEHERR EYLKTLDEDK RRQEEAKYEE MKKKHNDHPK VNHPGSKDQL KEVWEEADGL DPNDFDAKTF  
321 FKLHDVNADG FLDEQELEAL FTREVNMCNW IISESYFIWL SA

### Supporting Peptides:

| Peptide              | Uniq | -10lgP | Mass      | Length | ppm | m/z      | z | RT    | Fraction | Scan     | Source            | File    | Area F1 | Area F2 | Area F3 | Area F4 | Ratio |
|----------------------|------|--------|-----------|--------|-----|----------|---|-------|----------|----------|-------------------|---------|---------|---------|---------|---------|-------|
| K.MDAYQDSGIDHQALLK.Q | Y    | 59.48  | 1803.8461 | 16     | 1.3 | 902.9315 | 2 | 39.75 | 7        | F7:11265 | 17112021_RID_2349 | DP7.raw |         |         |         |         |       |
| K.ELDLVGHK.V         | Y    | 39.13  | 909.4919  | 8      | 0.8 | 455.7536 | 2 | 27.94 | 7        | F7:7151  | 17112021_RID_2349 | DP7.raw |         |         |         |         |       |

**total 2 peptides**

TRINITY DN1526

[back to list](#)

[Protein Coverage](#) | [Supporting Peptides](#)

Protein Coverage:

1 LGLSREQLQG GVSAKKGGRG RKGRREKGRG ECTKQTPTPG YLAVRAPVER RQTFSGSPGL HSRVMDPCRR KQIRWRITLL  
81 QQCVLLLTIV VIILEAVPID VDKTKVQEQE KDSATVDNPE TGLYDAYLR QVIEVLETD HFREKLQTTN VEDIKNGKLS  
161 **KELDLVGHKV** RTKLDELKRQ EVARLRMLIK **AKMDAYQDSG IDHQALLKQF** EHLNHHNPHT FEVKDLDMLI KAATHDLENY  
241 DNTRHEEFKK YEMMKEHERR EYLKTLDEDK RRQEEAKYEE MKKKHNDHPK VNHPGSKDQL KEVWEEADGL DPNDFDAKTF  
321 FKLHDVNADG FLDEQEAL FTRELEKVYD PKNEEDDMIE MEEERLRMRE HVMNEVDINK DRLITLEEFM RITEKREFSE  
401 PESWEVOMAL LN

Supporting Peptides:

| Peptide              | Uniq | -10lgP | Mass      | Length | ppm | m/z      | z | RT    | Fraction | Scan     | Source File               | Area F1 | Area F2 | Area F3 | Area F4 |
|----------------------|------|--------|-----------|--------|-----|----------|---|-------|----------|----------|---------------------------|---------|---------|---------|---------|
| K.MDAYQDSGIDHQALLK.Q | Y    | 59.48  | 1803.8461 | 16     | 1.3 | 902.9315 | 2 | 39.75 | 7        | F7:11265 | 17112021_RID_2349_DP7.raw |         |         |         |         |
| K.ELDLVGHK.V         | Y    | 39.13  | 909.4919  | 8      | 0.8 | 455.7536 | 2 | 27.94 | 7        | F7:7151  | 17112021_RID_2349_DP7.raw |         |         |         |         |

**total 2 peptides**

TRINITY DN1526

[back to list](#)

[Protein Coverage](#) | [Supporting Peptides](#) |

Protein Coverage:

1 LGLSREQLQG GVSAAKGGRG RKGRREKGRG ECTKQTPTPG YLAVRAPVER RQTFSGSPGL HSRVMDPCRR KQIRWRTTLL

81 QQCVLLLTIV VIILEAVPID VDKTKVQEQE KDSATVDNPE TGLYYDAYLR QVIEVLETDA HFREKLQTTN VEDIKNGKLS

161 **KELDLVGHKV** RTKLDELKRQ EVARLRMLIK **AKMDAYQDSG IDHQALLKQF** EHLNHNPHPT FEVKDLDMLI KAATHDLENY

241 DNTRHEEFKK YEMMKEHERR EYLKTLDEDK RRQEEAKYEE MKKKHNDHPK VNHPGSKDQL KEVWEEADGL DPNDFDAKTF

321 FKLHDVNADG FLDEQELEAL FTRELEKVID PKNEEDDMIE MEEERLRMRE HVMNEVDINK DRLITLEEFM RITEKREFSE

401 PESWETLDQQ EVFTEELKQ FESHIFQQED ELQKKALELQ KKREELEQQQ DFLQAQKQEL EMAFKQMQQK KLQQGHPPSG

481 PGGELKFQPS VSQLDGNVQN HPVSSNQPLA PGNIPVQEAA ARSDHAQSHP

Supporting Peptides:

| Peptide                | Uniq  | -10lgP    | Mass | Length | ppm      | m/z | z     | RT | Fraction | Scan     | Source File               | Area F1 | Area F2 | Area F3 | Area F4 |
|------------------------|-------|-----------|------|--------|----------|-----|-------|----|----------|----------|---------------------------|---------|---------|---------|---------|
| K.MDAYQDSGIDHQALLK.Q Y | 59.48 | 1803.8461 | 16   | 1.3    | 902.9315 | 2   | 39.75 | 7  |          | F7:11265 | 17112021_RID_2349_DP7.raw |         |         |         |         |
| K.ELDLVGHK.V Y         | 39.13 | 909.4919  | 8    | 0.8    | 455.7536 | 2   | 27.94 | 7  |          | F7:7151  | 17112021_RID_2349_DP7.raw |         |         |         |         |

total 2 peptides

TRINITY\_DN2452

[back to list](#)

[Protein Coverage](#) | [Supporting Peptides](#) |

Protein Coverage:

1 LPDSEAHAIY KYENIEKEDE GPKKCGVTQT NWESDEPIKA SQFILTPEQR AYMNANKYIK LVIVVDNVMF **RKYTGDLIAI**

81 **R**TRIYEIVNT LNLIYTILNI HIALVY

Supporting Peptides:

| Peptide          | Uniq  | -10lgP    | Mass | Length | ppm      | m/z | z     | RT | Fraction | Scan     | Source File               | Area F1 | Area F2  | Area F3 | Area F4  | Area F5 |
|------------------|-------|-----------|------|--------|----------|-----|-------|----|----------|----------|---------------------------|---------|----------|---------|----------|---------|
| K.YTGDLIAIR.T Y  | 54.91 | 1020.5604 | 9    | 0.2    | 511.2876 | 2   | 43.73 | 5  |          | F5:12611 | 17112021_RID_2349_DP5.raw |         | 3.2643E4 |         | 4.1422E4 | 3.85    |
| R.KYTGDLIAIR.T Y | 45.94 | 1148.6553 | 10   | 0.5    | 575.3352 | 2   | 37.96 | 5  |          | F5:10653 | 17112021_RID_2349_DP5.raw |         |          |         |          | 1.57    |

total 2 peptides

P00990.1

[back to list](#)

[Protein Coverage](#) | [Supporting Peptides](#) |

Protein Coverage:

1 HDRPTFCNLA PESGRRCRGLH **RRIYYNLESN K**CKVFFYGGC GGNANNFETR DECRETGGK

Supporting Peptides:

| Peptide          | Uniq  | -10lgP    | Mass | Length | ppm      | m/z | z     | RT | Fraction | Scan    | Source File               | Area F1 | Area F2 | Area F3 | Area F4  | Area F5 |
|------------------|-------|-----------|------|--------|----------|-----|-------|----|----------|---------|---------------------------|---------|---------|---------|----------|---------|
| R.IYYNLESNK.C Y  | 53.68 | 1142.5608 | 9    | -0.1   | 572.2876 | 2   | 34.45 | 7  |          | F7:9462 | 17112021_RID_2349_DP7.raw |         |         | 4.065E5 | 8.0118E5 | 1.074   |
| R.RIYYNLESNK.C Y | 46.56 | 1298.6619 | 10   | 0.4    | 650.3384 | 2   | 30.29 | 7  |          | F7:8008 | 17112021_RID_2349_DP7.raw |         |         |         |          |         |

total 2 peptides

TIVRV2

[back to list](#)

[Protein Coverage](#) | [Supporting Peptides](#) |

Protein Coverage:

1 HDRPTFCNLA PESGRRCRGLH **RRIYYNLESN K**CKVFFYGGC GGNANNFETR DECRETGGK

Supporting Peptides:

| Peptide          | Uniq  | -10lgP    | Mass | Length | ppm      | m/z | z     | RT | Fraction | Scan    | Source File               | Area F1 | Area F2 | Area F3 | Area F4  | Area F5 |
|------------------|-------|-----------|------|--------|----------|-----|-------|----|----------|---------|---------------------------|---------|---------|---------|----------|---------|
| R.IYYNLESNK.C Y  | 53.68 | 1142.5608 | 9    | -0.1   | 572.2876 | 2   | 34.45 | 7  |          | F7:9462 | 17112021_RID_2349_DP7.raw |         |         | 4.065E5 | 8.0118E5 | 1.074   |
| R.RIYYNLESNK.C Y | 46.56 | 1298.6619 | 10   | 0.4    | 650.3384 | 2   | 30.29 | 7  |          | F7:8008 | 17112021_RID_2349_DP7.raw |         |         |         |          |         |

total 2 peptides

CAL69611.1

[back to list](#)

[Protein Coverage](#) | [Supporting Peptides](#) |

Protein Coverage:

1 MSSGGLLLLL GLLTLWAEIT PISGHRPTF CNLAPESGRC RGHLE**RRIYYN LESNK**CEVFF YGGCGGNDNN FSTRDECRHT

81 CVGK

Supporting Peptides:

| Peptide        | Uniq | -10lgP | Mass      | Length | ppm  | m/z      | z | RT    | Fraction | Scan    | Source File               | Area F1 | Area F2 | Area F3 | Area F4  | Area  |
|----------------|------|--------|-----------|--------|------|----------|---|-------|----------|---------|---------------------------|---------|---------|---------|----------|-------|
| R.IYYNLESNK.C  | Y    | 53.68  | 1142.5608 | 9      | -0.1 | 572.2876 | 2 | 34.45 | 7        | F7:9462 | 17112021_RID_2349_DP7.raw |         |         | 4.065E5 | 8.0118E5 | 1.074 |
| R.RIYYNLESNK.C | Y    | 46.56  | 1298.6619 | 10     | 0.4  | 650.3384 | 2 | 30.29 | 7        | F7:8008 | 17112021_RID_2349_DP7.raw |         |         |         |          |       |

total 2 peptides

A8Y7P3.1  
[back to list](#)

| [Protein Coverage](#) | [Supporting Peptides](#) |

Protein Coverage:

1 MSSGGLLLLL GLLTLWAELT PISGHDRPTF CNLAPESGRC RGHLRRIYYN LESNKCEVFF YGGCGGNDNN FSTRDECRHT

81 CVGK

Supporting Peptides:

| Peptide        | Uniq | -10lgP | Mass      | Length | ppm  | m/z      | z | RT    | Fraction | Scan    | Source File               | Area F1 | Area F2 | Area F3 | Area F4  | Area  |
|----------------|------|--------|-----------|--------|------|----------|---|-------|----------|---------|---------------------------|---------|---------|---------|----------|-------|
| R.IYYNLESNK.C  | Y    | 53.68  | 1142.5608 | 9      | -0.1 | 572.2876 | 2 | 34.45 | 7        | F7:9462 | 17112021_RID_2349_DP7.raw |         |         | 4.065E5 | 8.0118E5 | 1.074 |
| R.RIYYNLESNK.C | Y    | 46.56  | 1298.6619 | 10     | 0.4  | 650.3384 | 2 | 30.29 | 7        | F7:8008 | 17112021_RID_2349_DP7.raw |         |         |         |          |       |

total 2 peptides

CAL69610.1  
[back to list](#)

| [Protein Coverage](#) | [Supporting Peptides](#) |

Protein Coverage:

1 MSSGGLLLLL GLLTLWAELT PISGHDRPTF CNLAPESGRC RGHLRRIYYN LESNKC NVFF YGGCGGNDNN FETRDECRQT

81 CGGK

Supporting Peptides:

| Peptide        | Uniq | -10lgP | Mass      | Length | ppm  | m/z      | z | RT    | Fraction | Scan    | Source File               | Area F1 | Area F2 | Area F3 | Area F4  | Area  |
|----------------|------|--------|-----------|--------|------|----------|---|-------|----------|---------|---------------------------|---------|---------|---------|----------|-------|
| R.IYYNLESNK.C  | Y    | 53.68  | 1142.5608 | 9      | -0.1 | 572.2876 | 2 | 34.45 | 7        | F7:9462 | 17112021_RID_2349_DP7.raw |         |         | 4.065E5 | 8.0118E5 | 1.074 |
| R.RIYYNLESNK.C | Y    | 46.56  | 1298.6619 | 10     | 0.4  | 650.3384 | 2 | 30.29 | 7        | F7:8008 | 17112021_RID_2349_DP7.raw |         |         |         |          |       |

total 2 peptides

A8Y7P2.1  
[back to list](#)

| [Protein Coverage](#) | [Supporting Peptides](#) |

Protein Coverage:

1 MSSGGLLLLL GLLTLWAELT PISGHDRPTF CNLAPESGRC RGHLRRIYYN LESNKC NVFF YGGCGGNDNN FETRDECRQT

81 CGGK

Supporting Peptides:

| Peptide        | Uniq | -10lgP | Mass      | Length | ppm  | m/z      | z | RT    | Fraction | Scan    | Source File               | Area F1 | Area F2 | Area F3 | Area F4  | Area  |
|----------------|------|--------|-----------|--------|------|----------|---|-------|----------|---------|---------------------------|---------|---------|---------|----------|-------|
| R.IYYNLESNK.C  | Y    | 53.68  | 1142.5608 | 9      | -0.1 | 572.2876 | 2 | 34.45 | 7        | F7:9462 | 17112021_RID_2349_DP7.raw |         |         | 4.065E5 | 8.0118E5 | 1.074 |
| R.RIYYNLESNK.C | Y    | 46.56  | 1298.6619 | 10     | 0.4  | 650.3384 | 2 | 30.29 | 7        | F7:8008 | 17112021_RID_2349_DP7.raw |         |         |         |          |       |

total 2 peptides

CAL69615.1  
[back to list](#)

| [Protein Coverage](#) | [Supporting Peptides](#) |

Protein Coverage:

1 MSSGGLLLLL GLLTLWAELT PISGHDRPTF CNLAPESGRC RGHLRRIYYN LESNCKVFF YGGCGGNANN FETRDECRQT

81 CGGK

Supporting Peptides:

| Peptide        | Uniq | -10lgP | Mass      | Length | ppm  | m/z      | z | RT    | Fraction | Scan    | Source File               | Area F1 | Area F2 | Area F3 | Area F4  | Area  |
|----------------|------|--------|-----------|--------|------|----------|---|-------|----------|---------|---------------------------|---------|---------|---------|----------|-------|
| R.IYYNLESNK.C  | Y    | 53.68  | 1142.5608 | 9      | -0.1 | 572.2876 | 2 | 34.45 | 7        | F7:9462 | 17112021_RID_2349_DP7.raw |         |         | 4.065E5 | 8.0118E5 | 1.074 |
| R.RIYYNLESNK.C | Y    | 46.56  | 1298.6619 | 10     | 0.4  | 650.3384 | 2 | 30.29 | 7        | F7:8008 | 17112021_RID_2349_DP7.raw |         |         |         |          |       |

total 2 peptides

AFE83617.1  
[back to list](#)

| [Protein Coverage](#) | [Supporting Peptides](#) |

Protein Coverage:

1 MSSGGLLLLL GLLTLWAELT PISGHDRPTF CNLAPESGRC RGHLRRIYYN LESNKCKVFF YGGCGGNDNN FETRDECRQT

81 CGGK

Supporting Peptides:

| Peptide        | Uniq | -10lgP | Mass      | Length | ppm  | m/z      | z | RT    | Fraction | Scan    | Source File               | Area F1 | Area F2 | Area F3 | Area F4  | Area  |
|----------------|------|--------|-----------|--------|------|----------|---|-------|----------|---------|---------------------------|---------|---------|---------|----------|-------|
| R.IYYNLESNK.C  | Y    | 53.68  | 1142.5608 | 9      | -0.1 | 572.2876 | 2 | 34.45 | 7        | F7:9462 | 17112021_RID_2349_DP7.raw |         |         | 4.065E5 | 8.0118E5 | 1.074 |
| R.RIYYNLESNK.C | Y    | 46.56  | 1298.6619 | 10     | 0.4  | 650.3384 | 2 | 30.29 | 7        | F7:8008 | 17112021_RID_2349_DP7.raw |         |         |         |          |       |

total 2 peptides

A8Y7P4.1

[back to list](#)

| [Protein Coverage](#) | [Supporting Peptides](#) |

Protein Coverage:

1 MSSGGLLLLL GLLTLWAELT PISGHDRPTF CNLAPESGRC RGHLRRIYYN LESNKCEVFF YGGCGGNDNN FSTWDECRHT

81 CVGK

Supporting Peptides:

| Peptide        | Uniq | -10lgP | Mass      | Length | ppm  | m/z      | z | RT    | Fraction | Scan    | Source File               | Area F1 | Area F2 | Area F3 | Area F4  | Area  |
|----------------|------|--------|-----------|--------|------|----------|---|-------|----------|---------|---------------------------|---------|---------|---------|----------|-------|
| R.IYYNLESNK.C  | Y    | 53.68  | 1142.5608 | 9      | -0.1 | 572.2876 | 2 | 34.45 | 7        | F7:9462 | 17112021_RID_2349_DP7.raw |         |         | 4.065E5 | 8.0118E5 | 1.074 |
| R.RIYYNLESNK.C | Y    | 46.56  | 1298.6619 | 10     | 0.4  | 650.3384 | 2 | 30.29 | 7        | F7:8008 | 17112021_RID_2349_DP7.raw |         |         |         |          |       |

total 2 peptides

AFE83616.1

[back to list](#)

| [Protein Coverage](#) | [Supporting Peptides](#) |

Protein Coverage:

1 MSSGGLLLLL GLLTLWAELT PISGHDRPTF CNLAPESGRC RGHLRRIYYN LESNKCEVFF YGGCGGNDNN FSTWDECRHT

81 CVGK

Supporting Peptides:

| Peptide        | Uniq | -10lgP | Mass      | Length | ppm  | m/z      | z | RT    | Fraction | Scan    | Source File               | Area F1 | Area F2 | Area F3 | Area F4  | Area  |
|----------------|------|--------|-----------|--------|------|----------|---|-------|----------|---------|---------------------------|---------|---------|---------|----------|-------|
| R.IYYNLESNK.C  | Y    | 53.68  | 1142.5608 | 9      | -0.1 | 572.2876 | 2 | 34.45 | 7        | F7:9462 | 17112021_RID_2349_DP7.raw |         |         | 4.065E5 | 8.0118E5 | 1.074 |
| R.RIYYNLESNK.C | Y    | 46.56  | 1298.6619 | 10     | 0.4  | 650.3384 | 2 | 30.29 | 7        | F7:8008 | 17112021_RID_2349_DP7.raw |         |         |         |          |       |

total 2 peptides

AFB74192.1

[back to list](#)

| [Protein Coverage](#) | [Supporting Peptides](#) |

Protein Coverage:

1 MSSGGLLLLL GLLTLWAELT PISGHDRPTF CNLAPESGRC RAHLRRIYYN LESNKCEVFF YGGCGGNDNN FSTWDECRHT

81 CVGK

Supporting Peptides:

| Peptide        | Uniq | -10lgP | Mass      | Length | ppm  | m/z      | z | RT    | Fraction | Scan    | Source File               | Area F1 | Area F2 | Area F3 | Area F4  | Area  |
|----------------|------|--------|-----------|--------|------|----------|---|-------|----------|---------|---------------------------|---------|---------|---------|----------|-------|
| R.IYYNLESNK.C  | Y    | 53.68  | 1142.5608 | 9      | -0.1 | 572.2876 | 2 | 34.45 | 7        | F7:9462 | 17112021_RID_2349_DP7.raw |         |         | 4.065E5 | 8.0118E5 | 1.074 |
| R.RIYYNLESNK.C | Y    | 46.56  | 1298.6619 | 10     | 0.4  | 650.3384 | 2 | 30.29 | 7        | F7:8008 | 17112021_RID_2349_DP7.raw |         |         |         |          |       |

total 2 peptides

CAL69614.1

[back to list](#)

| [Protein Coverage](#) | [Supporting Peptides](#) |

Protein Coverage:

1 MSSGGLLLLL GLLTLWAELT PISSHDRPKF CNLAPESGRC RGHLRRIYYN LESNKCKVFF YGGCGGNANN FETRDECRQT

81 CGGK

Supporting Peptides:

| Peptide       | Uniq | -10lgP | Mass      | Length | ppm  | m/z      | z | RT    | Fraction | Scan    | Source File               | Area F1 | Area F2 | Area F3 | Area F4  | Area  |
|---------------|------|--------|-----------|--------|------|----------|---|-------|----------|---------|---------------------------|---------|---------|---------|----------|-------|
| R.IYYNLESNK.C | Y    | 53.68  | 1142.5608 | 9      | -0.1 | 572.2876 | 2 | 34.45 | 7        | F7:9462 | 17112021_RID_2349_DP7.raw |         |         | 4.065E5 | 8.0118E5 | 1.074 |

total 2 peptides

| Peptide                                                                                   | Uniq -10lgP | Mass  | Length    | ppm | m/z  | z        | RT | Fraction | Scan | Source File                       | Area F1 | Area F2 | Area F3 | Area F4  | Area  |
|-------------------------------------------------------------------------------------------|-------------|-------|-----------|-----|------|----------|----|----------|------|-----------------------------------|---------|---------|---------|----------|-------|
| R.IYYNLESNK.C                                                                             | Y           | 46.56 | 1298.6619 | 10  | 0.4  | 650.3384 | 2  | 30.29    | 7    | F7:8008 17112021_RID_2349_DP7.raw |         |         |         |          |       |
| total 2 peptides                                                                          |             |       |           |     |      |          |    |          |      |                                   |         |         |         |          |       |
| A8Y7P6.1                                                                                  |             |       |           |     |      |          |    |          |      |                                   |         |         |         |          |       |
| <a href="#">back to list</a>                                                              |             |       |           |     |      |          |    |          |      |                                   |         |         |         |          |       |
| <a href="#">Protein Coverage</a>   <a href="#">Supporting Peptides</a>                    |             |       |           |     |      |          |    |          |      |                                   |         |         |         |          |       |
| Protein Coverage:                                                                         |             |       |           |     |      |          |    |          |      |                                   |         |         |         |          |       |
| 1 MSSGGLLLLL GLLTLWAELT PISSHDRPKF CNLAPESGRC RGHLRRIYYN LESNKCKVFF YGGCGGNANN FETRDECRQT |             |       |           |     |      |          |    |          |      |                                   |         |         |         |          |       |
| 81 CGGK                                                                                   |             |       |           |     |      |          |    |          |      |                                   |         |         |         |          |       |
| Supporting Peptides:                                                                      |             |       |           |     |      |          |    |          |      |                                   |         |         |         |          |       |
| Peptide                                                                                   | Uniq -10lgP | Mass  | Length    | ppm | m/z  | z        | RT | Fraction | Scan | Source File                       | Area F1 | Area F2 | Area F3 | Area F4  | Area  |
| R.IYYNLESNK.C                                                                             | Y           | 53.68 | 1142.5608 | 9   | -0.1 | 572.2876 | 2  | 34.45    | 7    | F7:9462 17112021_RID_2349_DP7.raw |         |         | 4.065E5 | 8.0118E5 | 1.074 |
| R.IYYNLESNK.C                                                                             | Y           | 46.56 | 1298.6619 | 10  | 0.4  | 650.3384 | 2  | 30.29    | 7    | F7:8008 17112021_RID_2349_DP7.raw |         |         |         |          |       |
| total 2 peptides                                                                          |             |       |           |     |      |          |    |          |      |                                   |         |         |         |          |       |
| A8Y7N5.1                                                                                  |             |       |           |     |      |          |    |          |      |                                   |         |         |         |          |       |
| <a href="#">back to list</a>                                                              |             |       |           |     |      |          |    |          |      |                                   |         |         |         |          |       |
| <a href="#">Protein Coverage</a>   <a href="#">Supporting Peptides</a>                    |             |       |           |     |      |          |    |          |      |                                   |         |         |         |          |       |
| Protein Coverage:                                                                         |             |       |           |     |      |          |    |          |      |                                   |         |         |         |          |       |
| 1 MSSGGLLLLL ALLTLWAELT PISGHDRPTF CNLAPESGRC RAHLRRIYYN LESNKCEVFF YGGCGGNDNN FSSWDECRHT |             |       |           |     |      |          |    |          |      |                                   |         |         |         |          |       |
| 81 CVGK                                                                                   |             |       |           |     |      |          |    |          |      |                                   |         |         |         |          |       |
| Supporting Peptides:                                                                      |             |       |           |     |      |          |    |          |      |                                   |         |         |         |          |       |
| Peptide                                                                                   | Uniq -10lgP | Mass  | Length    | ppm | m/z  | z        | RT | Fraction | Scan | Source File                       | Area F1 | Area F2 | Area F3 | Area F4  | Area  |
| R.IYYNLESNK.C                                                                             | Y           | 53.68 | 1142.5608 | 9   | -0.1 | 572.2876 | 2  | 34.45    | 7    | F7:9462 17112021_RID_2349_DP7.raw |         |         | 4.065E5 | 8.0118E5 | 1.074 |
| R.IYYNLESNK.C                                                                             | Y           | 46.56 | 1298.6619 | 10  | 0.4  | 650.3384 | 2  | 30.29    | 7    | F7:8008 17112021_RID_2349_DP7.raw |         |         |         |          |       |
| total 2 peptides                                                                          |             |       |           |     |      |          |    |          |      |                                   |         |         |         |          |       |
| CAL69608.1                                                                                |             |       |           |     |      |          |    |          |      |                                   |         |         |         |          |       |
| <a href="#">back to list</a>                                                              |             |       |           |     |      |          |    |          |      |                                   |         |         |         |          |       |
| <a href="#">Protein Coverage</a>   <a href="#">Supporting Peptides</a>                    |             |       |           |     |      |          |    |          |      |                                   |         |         |         |          |       |
| Protein Coverage:                                                                         |             |       |           |     |      |          |    |          |      |                                   |         |         |         |          |       |
| 1 MSSGGLLLLL GLLTLWAELT PISGHDRPTF CNLAPESGRC RGHLRRIYYN LESNKCKVFF YGGCGGNANN FETRDECRQT |             |       |           |     |      |          |    |          |      |                                   |         |         |         |          |       |
| 81 CGGK                                                                                   |             |       |           |     |      |          |    |          |      |                                   |         |         |         |          |       |
| Supporting Peptides:                                                                      |             |       |           |     |      |          |    |          |      |                                   |         |         |         |          |       |
| Peptide                                                                                   | Uniq -10lgP | Mass  | Length    | ppm | m/z  | z        | RT | Fraction | Scan | Source File                       | Area F1 | Area F2 | Area F3 | Area F4  | Area  |
| R.IYYNLESNK.C                                                                             | Y           | 53.68 | 1142.5608 | 9   | -0.1 | 572.2876 | 2  | 34.45    | 7    | F7:9462 17112021_RID_2349_DP7.raw |         |         | 4.065E5 | 8.0118E5 | 1.074 |
| R.IYYNLESNK.C                                                                             | Y           | 46.56 | 1298.6619 | 10  | 0.4  | 650.3384 | 2  | 30.29    | 7    | F7:8008 17112021_RID_2349_DP7.raw |         |         |         |          |       |
| total 2 peptides                                                                          |             |       |           |     |      |          |    |          |      |                                   |         |         |         |          |       |
| ABD24040.1                                                                                |             |       |           |     |      |          |    |          |      |                                   |         |         |         |          |       |
| <a href="#">back to list</a>                                                              |             |       |           |     |      |          |    |          |      |                                   |         |         |         |          |       |
| <a href="#">Protein Coverage</a>   <a href="#">Supporting Peptides</a>                    |             |       |           |     |      |          |    |          |      |                                   |         |         |         |          |       |
| Protein Coverage:                                                                         |             |       |           |     |      |          |    |          |      |                                   |         |         |         |          |       |
| 1 MSSGGLLLLL GLLTLWAELT PISGHDRPTF CNLAPESGRC RGHLRRIYYN LESNKCKVFF YGGCGGNANN FETRDECRQT |             |       |           |     |      |          |    |          |      |                                   |         |         |         |          |       |
| 81 CGGK                                                                                   |             |       |           |     |      |          |    |          |      |                                   |         |         |         |          |       |
| Supporting Peptides:                                                                      |             |       |           |     |      |          |    |          |      |                                   |         |         |         |          |       |
| Peptide                                                                                   | Uniq -10lgP | Mass  | Length    | ppm | m/z  | z        | RT | Fraction | Scan | Source File                       | Area F1 | Area F2 | Area F3 | Area F4  | Area  |
| R.IYYNLESNK.C                                                                             | Y           | 53.68 | 1142.5608 | 9   | -0.1 | 572.2876 | 2  | 34.45    | 7    | F7:9462 17112021_RID_2349_DP7.raw |         |         | 4.065E5 | 8.0118E5 | 1.074 |
| R.IYYNLESNK.C                                                                             | Y           | 46.56 | 1298.6619 | 10  | 0.4  | 650.3384 | 2  | 30.29    | 7    | F7:8008 17112021_RID_2349_DP7.raw |         |         |         |          |       |
| total 2 peptides                                                                          |             |       |           |     |      |          |    |          |      |                                   |         |         |         |          |       |
| CAL69612.1                                                                                |             |       |           |     |      |          |    |          |      |                                   |         |         |         |          |       |
| <a href="#">back to list</a>                                                              |             |       |           |     |      |          |    |          |      |                                   |         |         |         |          |       |
| <a href="#">Protein Coverage</a>   <a href="#">Supporting Peptides</a>                    |             |       |           |     |      |          |    |          |      |                                   |         |         |         |          |       |
| Protein Coverage:                                                                         |             |       |           |     |      |          |    |          |      |                                   |         |         |         |          |       |

1MSSGGLLLLLGLLTLWAELTPISGHDRPTFCNLAPESGRCRGHLRRIYYNLESNKCEVFFYGGCGGNDNNFSTWDECRHT

81CVGK

Supporting Peptides:

| Peptide        | Uniq | -10lgP | Mass      | Length | ppm  | m/z      | z | RT    | Fraction | Scan    | Source File               | Area F1 | Area F2 | Area F3 | Area F4  | Area  |
|----------------|------|--------|-----------|--------|------|----------|---|-------|----------|---------|---------------------------|---------|---------|---------|----------|-------|
| R.IYYNLESNK.C  | Y    | 53.68  | 1142.5608 | 9      | -0.1 | 572.2876 | 2 | 34.45 | 7        | F7:9462 | 17112021_RID_2349_DP7.raw |         |         | 4.065E5 | 8.0118E5 | 1.074 |
| R.RIYYNLESNK.C | Y    | 46.56  | 1298.6619 | 10     | 0.4  | 650.3384 | 2 | 30.29 | 7        | F7:8008 | 17112021_RID_2349_DP7.raw |         |         |         |          |       |

total 2 peptides

A8Y7P0.1

[back to list](#)

| [Protein Coverage](#) | [Supporting Peptides](#) |

Protein Coverage:

1MSSGGLLLLLGLLTLWAELTPISGHDRPTFCNLAPESGRCRGHLRRIYYNLESNKCKVFFYGGCGGNANNFETRDECRQT

81CGGK

Supporting Peptides:

| Peptide        | Uniq | -10lgP | Mass      | Length | ppm  | m/z      | z | RT    | Fraction | Scan    | Source File               | Area F1 | Area F2 | Area F3 | Area F4  | Area  |
|----------------|------|--------|-----------|--------|------|----------|---|-------|----------|---------|---------------------------|---------|---------|---------|----------|-------|
| R.IYYNLESNK.C  | Y    | 53.68  | 1142.5608 | 9      | -0.1 | 572.2876 | 2 | 34.45 | 7        | F7:9462 | 17112021_RID_2349_DP7.raw |         |         | 4.065E5 | 8.0118E5 | 1.074 |
| R.RIYYNLESNK.C | Y    | 46.56  | 1298.6619 | 10     | 0.4  | 650.3384 | 2 | 30.29 | 7        | F7:8008 | 17112021_RID_2349_DP7.raw |         |         |         |          |       |

total 2 peptides

AFE83615.1

[back to list](#)

| [Protein Coverage](#) | [Supporting Peptides](#) |

Protein Coverage:

1MSSGGLLLLLGLLTLWAELTPISGHDRPTFCNLAPESGRCRGHLRRIYYNLESNKCKVFFYGGCGGNANNFETRDECRQT

81CGGK

Supporting Peptides:

| Peptide        | Uniq | -10lgP | Mass      | Length | ppm  | m/z      | z | RT    | Fraction | Scan    | Source File               | Area F1 | Area F2 | Area F3 | Area F4  | Area  |
|----------------|------|--------|-----------|--------|------|----------|---|-------|----------|---------|---------------------------|---------|---------|---------|----------|-------|
| R.IYYNLESNK.C  | Y    | 53.68  | 1142.5608 | 9      | -0.1 | 572.2876 | 2 | 34.45 | 7        | F7:9462 | 17112021_RID_2349_DP7.raw |         |         | 4.065E5 | 8.0118E5 | 1.074 |
| R.RIYYNLESNK.C | Y    | 46.56  | 1298.6619 | 10     | 0.4  | 650.3384 | 2 | 30.29 | 7        | F7:8008 | 17112021_RID_2349_DP7.raw |         |         |         |          |       |

total 2 peptides

Q2ES50.1

[back to list](#)

| [Protein Coverage](#) | [Supporting Peptides](#) |

Protein Coverage:

1MSSGGLLLLLGLLTLWAELTPISGHDRPTFCNLAPESGRCRGHLRRIYYNLESNKCKVFFYGGCGGNANNFETRDECRQT

81CGGK

Supporting Peptides:

| Peptide        | Uniq | -10lgP | Mass      | Length | ppm  | m/z      | z | RT    | Fraction | Scan    | Source File               | Area F1 | Area F2 | Area F3 | Area F4  | Area  |
|----------------|------|--------|-----------|--------|------|----------|---|-------|----------|---------|---------------------------|---------|---------|---------|----------|-------|
| R.IYYNLESNK.C  | Y    | 53.68  | 1142.5608 | 9      | -0.1 | 572.2876 | 2 | 34.45 | 7        | F7:9462 | 17112021_RID_2349_DP7.raw |         |         | 4.065E5 | 8.0118E5 | 1.074 |
| R.RIYYNLESNK.C | Y    | 46.56  | 1298.6619 | 10     | 0.4  | 650.3384 | 2 | 30.29 | 7        | F7:8008 | 17112021_RID_2349_DP7.raw |         |         |         |          |       |

total 2 peptides

CAL69603.1

[back to list](#)

| [Protein Coverage](#) | [Supporting Peptides](#) |

Protein Coverage:

1MSSGGLLLLLALLTLWAELTPISGHDRPTFCNLAPESGRCRAHLRRIYYNLESNKCEVFFYGGCGGNDNNFSSWDECRHT

81CVGK

Supporting Peptides:

| Peptide        | Uniq | -10lgP | Mass      | Length | ppm  | m/z      | z | RT    | Fraction | Scan    | Source File               | Area F1 | Area F2 | Area F3 | Area F4  | Area  |
|----------------|------|--------|-----------|--------|------|----------|---|-------|----------|---------|---------------------------|---------|---------|---------|----------|-------|
| R.IYYNLESNK.C  | Y    | 53.68  | 1142.5608 | 9      | -0.1 | 572.2876 | 2 | 34.45 | 7        | F7:9462 | 17112021_RID_2349_DP7.raw |         |         | 4.065E5 | 8.0118E5 | 1.074 |
| R.RIYYNLESNK.C | Y    | 46.56  | 1298.6619 | 10     | 0.4  | 650.3384 | 2 | 30.29 | 7        | F7:8008 | 17112021_RID_2349_DP7.raw |         |         |         |          |       |

total 2 peptides

H6VC06.1  
[back to list](#)

[Protein Coverage](#) | [Supporting Peptides](#) |  
Protein Coverage:

| 1                    | MSSGGLLLLL | GLLTLWAE | LT        | PISGHDRPTF | CNLAPESGR | C        | RAHLR | <b>RIYYN</b> | <b>LESNK</b> | CEVFF   | YGGCGGNDNN                | FSTWDECRHT |         |         |          |         |         |
|----------------------|------------|----------|-----------|------------|-----------|----------|-------|--------------|--------------|---------|---------------------------|------------|---------|---------|----------|---------|---------|
| 81                   | CVGK       |          |           |            |           |          |       |              |              |         |                           |            |         |         |          |         |         |
| Supporting Peptides: |            |          |           |            |           |          |       |              |              |         |                           |            |         |         |          |         |         |
| Peptide              | Uniq       | -10lgP   | Mass      | Length     | ppm       | m/z      | z     | RT           | Fraction     | Scan    | Source File               | Area F1    | Area F2 | Area F3 | Area F4  | Area F5 | Area F6 |
| R.IYYNLESNK.C        | Y          | 53.68    | 1142.5608 | 9          | -0.1      | 572.2876 | 2     | 34.45        | 7            | F7:9462 | 17112021_RID_2349_DP7.raw |            |         | 4.065E5 | 8.0118E5 | 1.074   |         |
| R.RIYYNLESNK.C       | Y          | 46.56    | 1298.6619 | 10         | 0.4       | 650.3384 | 2     | 30.29        | 7            | F7:8008 | 17112021_RID_2349_DP7.raw |            |         |         |          |         |         |
| total 2 peptides     |            |          |           |            |           |          |       |              |              |         |                           |            |         |         |          |         |         |

TRINITY\_DN5102  
[back to list](#)

[Protein Coverage](#) | [Supporting Peptides](#) |  
Protein Coverage:

| 1                    | MAPPALLCFG | LGLCLCAAVA | GSRR       | <b>DSATGE</b> | <b>QLFK</b> | AWASRH     | RRAYRSEGEF | RHRMQIFLDN | KQKIDKHNAG | NYSFRMGLNQ |                           |         |         |          |         |         |         |
|----------------------|------------|------------|------------|---------------|-------------|------------|------------|------------|------------|------------|---------------------------|---------|---------|----------|---------|---------|---------|
| 81                   | FSDMTFAEFK | KTYLWQEPQN | CSATTGNFPR | SAGPCPRAID    | WRKKGRFVSP  | VKNQGPCGSC | WTFSTTGCLE | SAIAIKTGKL |            |            |                           |         |         |          |         |         |         |
| 161                  | LNLAEQQLID | CAQNFNNFGC | NGGLPSQAFE | YILYNKGLMD    | EEAYPYRAQN  | GTCKFQPPQA | VAFIKDVVNI | SLYDEHGLMQ |            |            |                           |         |         |          |         |         |         |
| 241                  | AVGTYNPVS  | AFEVKEDFVH | YQEGVYTSTD | CDKTPDKVNH    | AVLAVGYGEE  | DGVPFWIVKN | SWGFSWGLDG | YFNIERGKNT |            |            |                           |         |         |          |         |         |         |
| 321                  | CGLADCASFP | VPLL       |            |               |             |            |            |            |            |            |                           |         |         |          |         |         |         |
| Supporting Peptides: |            |            |            |               |             |            |            |            |            |            |                           |         |         |          |         |         |         |
| Peptide              | Uniq       | -10lgP     | Mass       | Length        | ppm         | m/z        | z          | RT         | Fraction   | Scan       | Source File               | Area F1 | Area F2 | Area F3  | Area F4 | Area F5 | Area F6 |
| R.DSATGEQLFK.A       | Y          | 60.36      | 1094.5244  | 10            | -0.1        | 548.2694   | 2          | 37.40      | 2          | F2:10112   | 12112021_RID_2349_DP2.raw |         |         | 8.6583E4 |         |         |         |
| total 1 peptides     |            |            |            |               |             |            |            |            |            |            |                           |         |         |          |         |         |         |

CAE47141.1  
[back to list](#)

[Protein Coverage](#) | [Supporting Peptides](#) |  
Protein Coverage:

| 1                    | MRILWIVAVC | LIGAEGHLSQ | FGDMINKKTG | IFGIMSYIYY | GCYCGWGGKG | KPLDATDRCC     | FVHDCCYGRV  | NGCDPKMGTY    |          |          |                           |         |         |         |         |         |         |
|----------------------|------------|------------|------------|------------|------------|----------------|-------------|---------------|----------|----------|---------------------------|---------|---------|---------|---------|---------|---------|
| 81                   | SYSFQNGDIV | CGGDDPCLRA | VCECDRVA   | AI         | CFG        | <b>ENMNTYD</b> | <b>RKYM</b> | <b>LYSLFD</b> | CKEESEQC |          |                           |         |         |         |         |         |         |
| Supporting Peptides: |            |            |            |            |            |                |             |               |          |          |                           |         |         |         |         |         |         |
| Peptide              | Uniq       | -10lgP     | Mass       | Length     | ppm        | m/z            | z           | RT            | Fraction | Scan     | Source File               | Area F1 | Area F2 | Area F3 | Area F4 | Area F5 | Area F6 |
| R.KYMLYSLFD.C        | N          | 43.04      | 1178.5681  | 9          | 0.2        | 590.2914       | 2           | 60.72         | 7        | F7:18383 | 17112021_RID_2349_DP7.raw |         |         |         |         |         |         |
| G.ENMNTYDRK.Y        | Y          | 39.03      | 1169.5135  | 9          | -9.0       | 585.7588       | 2           | 23.22         | 7        | F7:5585  | 17112021_RID_2349_DP7.raw |         |         |         |         |         |         |
| total 2 peptides     |            |            |            |            |            |                |             |               |          |          |                           |         |         |         |         |         |         |

ABB76279.1  
[back to list](#)

[Protein Coverage](#) | [Supporting Peptides](#) |  
Protein Coverage:

| 1                               | MVLIRVLANL | LILQLSYAQK     | SSELVIGGDE      | CNINEHRS   | LA         | L          | VYITSGFLC  | GGT      | LT         | LNQQWV   | L                         | TAAHCD  | RGN     | MLIFFD  | VHSL    |         |         |
|---------------------------------|------------|----------------|-----------------|------------|------------|------------|------------|----------|------------|----------|---------------------------|---------|---------|---------|---------|---------|---------|
| 81                              | KGLNKDVQSR | VAKEKFICPN     | RKKDDEKDKD      | IMLIKLDSPV | SNSEHIAPLS | LPSNPPSVGS | VCRIMGWGAI | TSPNVTLP | GV         |          |                           |         |         |         |         |         |         |
| 161                             | PHCANINILD | YEVCRKAYTG     | LPATSRTLCA      | GILEGGKDSC | KGDSGGPLIC | NGQFQGI    | VS         | W        | GAHPCGQSLK | PGVYTK   | <b>VFDY</b>               |         |         |         |         |         |         |
| 241                             | <b>TEW</b> | <b>IQSILAG</b> | <b>NADATCPP</b> |            |            |            |            |          |            |          |                           |         |         |         |         |         |         |
| Supporting Peptides:            |            |                |                 |            |            |            |            |          |            |          |                           |         |         |         |         |         |         |
| Peptide                         | Uniq       | -10lgP         | Mass            | Length     | ppm        | m/z        | z          | RT       | Fraction   | Scan     | Source File               | Area F1 | Area F2 | Area F3 | Area F4 | Area F5 | Area F6 |
| K.VFDYTEWISILAGNADATC(+57.02)PP | Y          | 43.47          | 2467.1365       | 22         | 0.5        | 1234.5762  | 2          | 83.71    | 4          | F4:25719 | 17112021_RID_2349_DP4.raw |         |         |         |         |         |         |

ADI47595.1  
[back to list](#)

[Protein Coverage](#) | [Supporting Peptides](#) |  
Protein Coverage:

1DLTAMRTRVYEMINTVNEIYIYMDIRVPLVGIEFWCNGDLITVTSSAENTLNSFGDWRASDLLSHKTHDN AQLLTITLS

81GSVVGLAHVSSMCQATRSGVGVIEDHSPIVREVAVTMAHEMGHNLGMSHDGNQCKCGDNSCIMYPYLSEPLPMFFSNCSKD

161QYQKFLTNTFKPDCTLIRPSRTDIVSPPVCGNDLLERGEEDCGSPENCENPCCDAASCKLHSWIECEFGECCETCRLKPA

241GTECRGIRNECDLPEYCTGQSGDCPTDHFH

Supporting Peptides:

| Peptide                        | Uniq -10lgP | Mass      | Length | ppm | m/z      | z | RT    | Fraction | Scan     | Source File               | Area F1  | Area A F2 |
|--------------------------------|-------------|-----------|--------|-----|----------|---|-------|----------|----------|---------------------------|----------|-----------|
| R.TDIVSPPVC(+57.02)GNDLLER.G Y | 54.09       | 1783.8774 | 16     | 0.3 | 892.9462 | 2 | 47.68 | 1        | F1:14421 | 12112021_RID_2349_DP1.raw | 4.3022E6 |           |

ADI47604.1

[back to list](#)

[Protein Coverage](#) | [Supporting Peptides](#) |

Protein Coverage:

1CIMYPYLSEPLPMFFSNCSKDQYQKFLTNTFKPDCTLIRPSRTDIVSPPVCGNDLLERGEEDCGSPENCENPCCDAASCK

81LHSWIECEFGECCCEQCRLKPAAGTECRGIRNECDLPEYCTGQSGDCPTDHFHRNGKPCLYNNGYCYNGACPIMEYQCYDHF

161GPDVVSQDACFEKNKEGKGDYFCRNENYVKTPCAPEDVKCGRLFCDIGPNRCIFPYGDTGMVNPGTKCGDKKVCXHRKC

241IDVNTTY

Supporting Peptides:

| Peptide                        | Uniq -10lgP | Mass      | Length | ppm | m/z      | z | RT    | Fraction | Scan     | Source File               | Area F1  | Area A F2 |
|--------------------------------|-------------|-----------|--------|-----|----------|---|-------|----------|----------|---------------------------|----------|-----------|
| R.TDIVSPPVC(+57.02)GNDLLER.G Y | 54.09       | 1783.8774 | 16     | 0.3 | 892.9462 | 2 | 47.68 | 1        | F1:14421 | 12112021_RID_2349_DP1.raw | 4.3022E6 |           |

TRINITY\_DN722

[back to list](#)

[Protein Coverage](#) | [Supporting Peptides](#) |

Protein Coverage:

1MLLILALSLSLHTYVVYGSISCYDDSGKPVDWFIVYKLPKSHQSSLAEGMQYMYQDGRTOGWVQGRSLMNSTEGAVGRTLN

81ELYLEAANRQREKEVAVVLYNDEPPQDSSSGSKGHTKGVIFLDRTQGFWLVHSTPRFPPKLDEKYAWPHTALTYGQSFLC

161VTYPYSQFKAIGNQLLFTEPHVYDYQVPVAFARDLPALLNASEGQHVQEEPWNSRVTLTSKGGKEFVSFAKFRFFHDDL

241SGWLAQALATDLYVEFWLKS HGVLASNCSGKYKVYNVEQLAFQDPATTFSTSDHSHKWCVGIESDSEWACVGDMMNRNRAE

321EHRGGGTICRDVTIWKSFLSLVQNYRDCD TTGYGL

Supporting Peptides:

| Peptide            | Uniq -10lgP | Mass      | Length | ppm | m/z      | z | RT    | Fraction | Scan     | Source File               | Area F1  | Area F2          | Area F3 | Area F4 | Area F5 |
|--------------------|-------------|-----------|--------|-----|----------|---|-------|----------|----------|---------------------------|----------|------------------|---------|---------|---------|
| R.TLNELYLEAANR.Q Y | 72.61       | 1405.7201 | 12     | 0.9 | 703.8679 | 2 | 46.94 | 2        | F2:13276 | 12112021_RID_2349_DP2.raw | 3.0191E5 |                  |         |         |         |
|                    |             |           |        |     |          |   |       |          |          |                           |          | total 1 peptides |         |         |         |

TRINITY\_DN722

[back to list](#)

[Protein Coverage](#) | [Supporting Peptides](#) |

Protein Coverage:

1MLLILALSLSLHTYVVYGSISCYDDSGKPVDWFIVYKLPKSHQSSLAEGMQYMYQDGRTOGWVQGRSLMNSTEGAVGRTLN

81ELYLEAANRQVSLQKEQFQFLLVSKIVVMG

Supporting Peptides:

| Peptide            | Uniq -10lgP | Mass      | Length | ppm | m/z      | z | RT    | Fraction | Scan     | Source File               | Area F1  | Area F2          | Area F3 | Area F4 | Area F5 |
|--------------------|-------------|-----------|--------|-----|----------|---|-------|----------|----------|---------------------------|----------|------------------|---------|---------|---------|
| R.TLNELYLEAANR.Q Y | 72.61       | 1405.7201 | 12     | 0.9 | 703.8679 | 2 | 46.94 | 2        | F2:13276 | 12112021_RID_2349_DP2.raw | 3.0191E5 |                  |         |         |         |
|                    |             |           |        |     |          |   |       |          |          |                           |          | total 1 peptides |         |         |         |

TRINITY\_DN722

[back to list](#)

[Protein Coverage](#) | [Supporting Peptides](#) |

Protein Coverage:

1FCKILMLLILALSHTYVYVYGSISCYDDSGKPVDWFIVYKLPKSHQSSLAEGMQYMYQDGRTOGWVQGRSLMNSTEGAV

81GRTLNELYLEAANRQREKEVAYVLYNDEPPQDSSSGSKGHTKGSALASNVFKERG

Supporting Peptides:

| Peptide            | Uniq -10lgP | Mass      | Length | ppm | m/z      | z | RT    | Fraction | Scan     | Source File               | Area F1  | Area F2          | Area F3 | Area F4 | Area F5 |
|--------------------|-------------|-----------|--------|-----|----------|---|-------|----------|----------|---------------------------|----------|------------------|---------|---------|---------|
| R.TLNELYLEAANR.Q Y | 72.61       | 1405.7201 | 12     | 0.9 | 703.8679 | 2 | 46.94 | 2        | F2:13276 | 12112021_RID_2349_DP2.raw | 3.0191E5 |                  |         |         |         |
|                    |             |           |        |     |          |   |       |          |          |                           |          | total 1 peptides |         |         |         |

TRINITY\_DN86540

[back to list](#)

[Protein Coverage](#) | [Supporting Peptides](#) |

Protein Coverage:

1

GGRQSERLGS

PPEKARQRLY

SPPREEGVCC

FGRDGEGLVP

SASPGLIKGQ

PGCRGHEPAK

MVLSEDDKSK

VRASWSPVCK

81

NPELYGSETL

TRMFAAHPTT

KTYFPFHDLS

PGSSDLKAHG

KKVIDALTEA

VNNLDDVAGA

LSKLSDLHAH

KLRVDPVNFK

161

LLAHCLEVTI

AAHNGGPLKP

EVILALDKFL

CLVAKVLVSR

YR

Supporting Peptides:

| Peptide           | Uniq | -10lgP | Mass      | Length | ppm | m/z      | z | RT    | Fraction | Scan     | Source File               | Area F1 | Area F2 | Area F3 | Area F4 | Area  |
|-------------------|------|--------|-----------|--------|-----|----------|---|-------|----------|----------|---------------------------|---------|---------|---------|---------|-------|
| A.VNNLDDVAGALSK.L | Y    | 49.66  | 1314.6779 | 13     | 1.5 | 658.3472 | 2 | 43.46 | 7        | F7:12535 | 17112021_RID_2349_DP7.raw |         |         |         |         |       |
| K.LRVDPVNFK.L     | N    | 42.14  | 1086.6185 | 9      | 0.0 | 544.3165 | 2 | 36.89 | 7        | F7:10234 | 17112021_RID_2349_DP7.raw |         |         |         |         | 4.637 |
| total 2 peptides  |      |        |           |        |     |          |   |       |          |          |                           |         |         |         |         |       |

P0C0U6.1  
[back to list](#)

[Protein Coverage](#) | [Supporting Peptides](#) |

Protein Coverage:

1

VLTEEDKSRV

RAAWGPVSKN

AELYGAETLT

RLFTAYPATK

TYFHHFDLSP

GSSNLKTHGK

KVIDAITEAV

NNLDDVAGAL

81

SKLSDLHAQK

LRVDPVNFKL

LGHCLEVTIA

AHNGGPLKPE

VILSLDKFLC

LVAKTLVSR

R

Supporting Peptides:

| Peptide           | Uniq | -10lgP | Mass      | Length | ppm | m/z      | z | RT    | Fraction | Scan     | Source File               | Area F1 | Area F2 | Area F3 | Area F4 | Area  |
|-------------------|------|--------|-----------|--------|-----|----------|---|-------|----------|----------|---------------------------|---------|---------|---------|---------|-------|
| A.VNNLDDVAGALSK.L | Y    | 49.66  | 1314.6779 | 13     | 1.5 | 658.3472 | 2 | 43.46 | 7        | F7:12535 | 17112021_RID_2349_DP7.raw |         |         |         |         |       |
| K.LRVDPVNFK.L     | N    | 42.14  | 1086.6185 | 9      | 0.0 | 544.3165 | 2 | 36.89 | 7        | F7:10234 | 17112021_RID_2349_DP7.raw |         |         |         |         | 4.637 |
| total 2 peptides  |      |        |           |        |     |          |   |       |          |          |                           |         |         |         |         |       |

XP\_026532450.1  
[back to list](#)

[Protein Coverage](#) | [Supporting Peptides](#) |

Protein Coverage:

1

MVLTEEDKAR

VRACWVPVSK

NAELYGAETI

TRLFAAHPTT

KTYFPFHDVS

PGSNDLKAHG

KKVIDALTEA

VNNLDDVAGA

81

LSKLSDLHAQ

KLRVDPVNFK

FLAHCLEVTI

AAHNGGPLKP

EVILSLDKFM

DIVSKVLVSR

YR

Supporting Peptides:

| Peptide           | Uniq | -10lgP | Mass      | Length | ppm | m/z      | z | RT    | Fraction | Scan     | Source File               | Area F1 | Area F2 | Area F3 | Area F4 | Area  |
|-------------------|------|--------|-----------|--------|-----|----------|---|-------|----------|----------|---------------------------|---------|---------|---------|---------|-------|
| A.VNNLDDVAGALSK.L | Y    | 49.66  | 1314.6779 | 13     | 1.5 | 658.3472 | 2 | 43.46 | 7        | F7:12535 | 17112021_RID_2349_DP7.raw |         |         |         |         |       |
| K.LRVDPVNFK.F     | N    | 42.14  | 1086.6185 | 9      | 0.0 | 544.3165 | 2 | 36.89 | 7        | F7:10234 | 17112021_RID_2349_DP7.raw |         |         |         |         | 4.637 |
| total 2 peptides  |      |        |           |        |     |          |   |       |          |          |                           |         |         |         |         |       |

XP\_026570824.1  
[back to list](#)

[Protein Coverage](#) | [Supporting Peptides](#) |

Protein Coverage:

1

MVLTEEDKAR

VRASWVPVSK

NAELYGAETL

TRLFSAHPTT

KTYFPFHDLS

PGSHDLKAHG

KKVIDALTEA

VNNLDDVAGA

81

LSKLSDLHAQ

KLRVDPVNFK

LLGQCLEVTI

AAHNGGPLKP

EVILSLDKFL

DLASKLLVSR

YR

Supporting Peptides:

| Peptide           | Uniq | -10lgP | Mass      | Length | ppm | m/z      | z | RT    | Fraction | Scan     | Source File               | Area F1 | Area F2 | Area F3 | Area F4 | Area  |
|-------------------|------|--------|-----------|--------|-----|----------|---|-------|----------|----------|---------------------------|---------|---------|---------|---------|-------|
| A.VNNLDDVAGALSK.L | Y    | 49.66  | 1314.6779 | 13     | 1.5 | 658.3472 | 2 | 43.46 | 7        | F7:12535 | 17112021_RID_2349_DP7.raw |         |         |         |         |       |
| K.LRVDPVNFK.L     | N    | 42.14  | 1086.6185 | 9      | 0.0 | 544.3165 | 2 | 36.89 | 7        | F7:10234 | 17112021_RID_2349_DP7.raw |         |         |         |         | 4.637 |
| total 2 peptides  |      |        |           |        |     |          |   |       |          |          |                           |         |         |         |         |       |

XP\_034284997.1  
[back to list](#)

[Protein Coverage](#) | [Supporting Peptides](#) |

Protein Coverage:

1

MVLTEEDKAR

VRASWGTVSK

NAELYGSETL

SRLFTVYPAT

KTYFHHFDVS

PGSSDLKSHG

KKVIDAITEA

VNNLDDVAGA

81

LSKLSDLHAQ

KLRVDPVNFK

LLAHCLEVTI

AAHNGGPLKP

EVILSVDKFL

DKVAKVLVSR

YR

Supporting Peptides:

| Peptide           | Uniq | -10lgP | Mass      | Length | ppm | m/z      | z | RT    | Fraction | Scan     | Source File               | Area F1 | Area F2 | Area F3 | Area F4 | Area  |
|-------------------|------|--------|-----------|--------|-----|----------|---|-------|----------|----------|---------------------------|---------|---------|---------|---------|-------|
| A.VNNLDDVAGALSK.L | Y    | 49.66  | 1314.6779 | 13     | 1.5 | 658.3472 | 2 | 43.46 | 7        | F7:12535 | 17112021_RID_2349_DP7.raw |         |         |         |         |       |
| K.LRVDPVNFK.L     | N    | 42.14  | 1086.6185 | 9      | 0.0 | 544.3165 | 2 | 36.89 | 7        | F7:10234 | 17112021_RID_2349_DP7.raw |         |         |         |         | 4.637 |
| total 2 peptides  |      |        |           |        |     |          |   |       |          |          |                           |         |         |         |         |       |

| Peptide           | Uniq | -10lgP | Mass      | Length | ppm | m/z      | z | RT    | Fraction | Scan     | Source File               | Area F1 | Area F2 | Area F3 | Area F4 | Area  |
|-------------------|------|--------|-----------|--------|-----|----------|---|-------|----------|----------|---------------------------|---------|---------|---------|---------|-------|
| A.VNNLDDVAGALSK.L | Y    | 49.66  | 1314.6779 | 13     | 1.5 | 658.3472 | 2 | 43.46 | 7        | F7:12535 | 17112021_RID_2349_DP7.raw |         |         |         |         |       |
| K.LRVDPVNFK.L     | N    | 42.14  | 1086.6185 | 9      | 0.0 | 544.3165 | 2 | 36.89 | 7        | F7:10234 | 17112021_RID_2349_DP7.raw |         |         |         |         | 4.637 |
| total 2 peptides  |      |        |           |        |     |          |   |       |          |          |                           |         |         |         |         |       |

XP\_032079120.1  
[back to list](#)

| [Protein Coverage](#) | [Supporting Peptides](#) |  
Protein Coverage:

1 MVLTEEDKAR VRACWGPVSK NAELYGSEAL TRLFAAHPAA KTYFHHFDVS PGSSDLKTHG KKVIDAITEA VNNLDDVAGA

81 LSKLSDLHAQ KLRVDPVNFK LLGHCLEVTI AAHNGGPLKA EVLLSLDKFL CKVAKVLVSR YR

Supporting Peptides:

| Peptide           | Uniq | -10lgP | Mass      | Length | ppm | m/z      | z | RT    | Fraction | Scan     | Source File               | Area F1 | Area F2 | Area F3 | Area F4 | Area  |
|-------------------|------|--------|-----------|--------|-----|----------|---|-------|----------|----------|---------------------------|---------|---------|---------|---------|-------|
| A.VNNLDDVAGALSK.L | Y    | 49.66  | 1314.6779 | 13     | 1.5 | 658.3472 | 2 | 43.46 | 7        | F7:12535 | 17112021_RID_2349_DP7.raw |         |         |         |         |       |
| K.LRVDPVNFK.L     | N    | 42.14  | 1086.6185 | 9      | 0.0 | 544.3165 | 2 | 36.89 | 7        | F7:10234 | 17112021_RID_2349_DP7.raw |         |         |         |         | 4.637 |
| total 2 peptides  |      |        |           |        |     |          |   |       |          |          |                           |         |         |         |         |       |

JAC95434.1  
[back to list](#)

| [Protein Coverage](#) | [Supporting Peptides](#) |  
Protein Coverage:

1 MVLTEEDKAR VRACWGPVCK NAEVYGAESL TRMFAAHPTT KTYFHHLDVDS PGSNDLKTHG KKVIDAITEA VNNLDDVAGA

81 LSKLSDLHAQ KLRVDPVNFK LLAHCLEITI AAHNGGPLKP EVILSLDKFL CLVAKVLVSR YR

Supporting Peptides:

| Peptide           | Uniq -10lgP | Mass  | Length    | ppm | m/z | z        | RT      | Fraction | Scan     | Source File               | Area F1 | Area F2 | Area F3 | Area F4 | Area  |
|-------------------|-------------|-------|-----------|-----|-----|----------|---------|----------|----------|---------------------------|---------|---------|---------|---------|-------|
| A.VNNLDDVAGALSK.L | Y           | 49.66 | 1314.6779 | 13  | 1.5 | 658.3472 | 2 43.46 | 7        | F7:12535 | 17112021_RID_2349_DP7.raw |         |         |         |         |       |
| K.LRVDPVNFK.L     | N           | 42.14 | 1086.6185 | 9   | 0.0 | 544.3165 | 2 36.89 | 7        | F7:10234 | 17112021_RID_2349_DP7.raw |         |         |         |         | 4.637 |
| total 2 peptides  |             |       |           |     |     |          |         |          |          |                           |         |         |         |         |       |

LAA66838.1  
[back to list](#)

| [Protein Coverage](#) | [Supporting Peptides](#) |  
Protein Coverage:

1 VHGEGLSPAVG GHQPAKMVLT DEDKARVRAC WGPVSKNAEL YGSEALTRLF AAYPTTKTYF HHFDLSPGSN DLKSHGKKVI

81 DALTEAVNNL DDVAGALSKL SDLHAQKLRV DPVNFKLLGH SLEVTIAAHN GGPLKAEVLL SLDKFLDRVA KVLVSR YR

Supporting Peptides:

| Peptide           | Uniq | -10lgP | Mass      | Length | ppm | m/z      | z | RT    | Fraction | Scan     | Source File               | Area F1 | Area F2 | Area F3 | Area F4 | Area  |
|-------------------|------|--------|-----------|--------|-----|----------|---|-------|----------|----------|---------------------------|---------|---------|---------|---------|-------|
| A.VNNLDDVAGALSK.L | Y    | 49.66  | 1314.6779 | 13     | 1.5 | 658.3472 | 2 | 43.46 | 7        | F7:12535 | 17112021_RID_2349_DP7.raw |         |         |         |         |       |
| K.LRVDPVNFK.L     | N    | 42.14  | 1086.6185 | 9      | 0.0 | 544.3165 | 2 | 36.89 | 7        | F7:10234 | 17112021_RID_2349_DP7.raw |         |         |         |         | 4.637 |
| total 2 peptides  |      |        |           |        |     |          |   |       |          |          |                           |         |         |         |         |       |

XP\_029140879.1  
[back to list](#)

| [Protein Coverage](#) | [Supporting Peptides](#) |  
Protein Coverage:

1 MGHPQLWPLL LLLLLSNEAL TRDATRFKPF RKYIYHYETE ITSGVTGTAD SHSGSKIKCK AELEVPQLHN FVLKINQCTL  
 81 EEVYGIDVQG KALLKKSNS DEFAAAMSQY ELKVKIQNEK NVELYPVDSE ATHILNIKRG IISALLVPTE REDNIQTLSM  
 161 DTVYGKCDSS IEVKNRKTTA NLADIEITRN LKSCENFNPI RDYVSPIAFI KGLNAPLSTL ISSNQHCHYT VDTKKKHISE  
 241 AICTEKHLFL PSSYKNQYGM MAKVIQTLKY ESIANSNTRS MDVTGLIKRE LSLENVEAKI LRHGDVAVLS LQELKKLSVS  
 321 QQNHKRASLF YRFVTGLRSL HNSTLGPMPV KLMTSSSSIT IQALIQCCTP ECFGAILQIL RTSNIDPLVA DAVTFSGLLL  
 401 PSPCTKTIRE ILNMAEYHPS RASFYALSHS VNRFYSSQKKI ITPELTDVAN FVTSLISNEC SGNEDLTYLT LRVIGNMGNI  
 481 LENVNPVVKQ SLKLCIRSNA ASLDIQKAAI QALRKMDLND EDRGMLIRVF QEASSPADKR LAAYLLLMMN PSTSDLSKII  
 561 KVSRLDKNEQ VKNFVASHIA NILDITIDFSN EPYLPMLRIK IQEALKGNQM PTVKDFRRFS QNYQVSKTMT VPWSQDPFTA  
 641 KLEGNLLFDP SSIYIAKEAML KTTLELFGLR PLDVFEIGLD GKNLEPTVEA MFGPEGFFPD AATKALYWID GKVPEQFSQA  
 721 LFNYFGYSKD ATQDQDIMKG IMLNFEKLVK EISNKPTPDV KAYFRLFQEE LGYLKFSQDIK LLGNVILKSF KTLQSIPQKI  
 801 VQTISQGTEN DLMIHIFMD NEFELPTSAG LQLQVALSGV ATPGAKVGMK ISQRNIHADL IVKPSMAVEF ITHLGVNIPE  
 881 FARNGVQMNT NIYHESGIEA NVALKAGHLK FTIPAPKAPI KLFSISNVLH LVTPTRNEVI PPLMENRVTQ NNCSPPFTGL  
 961 KFCTIIEYSN ASSTVAAPYY PLTGETRYEI ELQPTGRVKE YIASANYELN KEGKDLVDTL KFAIAQAKGVK ESEAKIVFTF  
 1041 NRGKKIFISD FQAPGFNINF GTNLKITDSS NQEKKAFAFI LDILNEK**SPE ITITGR**LSSA FGRESSLEAA ISIPRLQTQA  
 1121 KTDISLRSS NAMIFQFDSS ATSYGSSVSE RIVLRYDTEK VELQWNSGTS AALKRICANL PGDLEGYSKA LQNKANGLLN  
 1201 HKVANTDMTL RHIVSHFIVA TNTWLQKTSK DIPYAQNLD KLSKLQQLDF QIVDVITPE ELFFKSDGKI KYVWNKESTF  
 1281 ITIPMPFGGQ SSQVISIPKI IRAPAMVVES LGLNIPSQEI KIPQFTIPND YTLRLPLLGT FEITSNLYNN YYNWGSYSYL  
 1361 ANTTKDAYGL KTRYFMKADS VLDLLSYNVQ GQAEASYDGN GLTCDYENSL RHSLNLSNFK FSKVNRVGLN PTVKYSMTFD  
 1441 TSSPVGVMS LSAHQDSTED DNSHVGVNTL EGQLNVATLF AKTTYLQSIK SKKKSLLDLVW DSTLKFSSSL FGATNQMIQK  
 1521 ITEDAWTINS ITNIQNYILT NKVSLRYQNS QLKLSSEAIG TYTNFETINK FDLTLDKQQA ILHSLKATY FKNVYYALVS  
 1601 GSVNNQGVEL IGDLSWENER NKAHKSALS IKQDGLVSSA TTKLQLLLLI LENEMNARIG TSGASVKIDT NGRAGTHNAR  
 1681 FSLDGKLALT EIALLSYQGG SILEVDSKNI LNFRVNNGEL RFSNSLTGSH KEMQFEHTE LNIVGLSLTY VSNLDHTINP  
 1761 DVSHKHHVDL QLQPSSTAN LNNDLKYSSA NVNNKARLQL ELLKVNLDGN IKGAYSGNEI KHTYIFTYGD LAAHMKTDTA  
 1841 ASIQGAAVTH KVNINAVAGLS STINVNTNCD SKFLTFSNEI RSMAAPFTVT FDMHTNGDGQ LGEQSGRLYS KFLKAEPLA  
 1921 IVFSDHYQGS TNHNINSGER YNTGLDSKVT VVLTPSEQSS AWKMSQLNN HVHTQDINMF NNAENIGLEL TGQTLADLSA  
 2001 LDFPMKIPFT NDRRLNLIDT LDLRENIAEP QEFGLSLSLK YDKNADMHI NLPFLERLPA YVEQFRRSIL TAMKSIQKNL  
 2081 KNINIDQLMR KYKIALDKFP QQVNDYVNSF DLERKVNKLK ENLDAFTKDY SITVEDLQNT LENAKANLLK ALTQLQVFLT  
 2161 ETEKYMKENY DLRPAIMQLI EKIVEKLKVL DDQYEISVTM INTIQQLQSF ISQYDPSEIG SNAAAWVQNV DTYKIRAQI  
 2241 QEKLQQLKQ IONFDAQHIA ETLKQOIETI DTKILIEKLK IQFPFEKINQ LLEQIKNILL NFMEDYEISE KINAFVRMH  
 2321 ELIVKYNIDE QAKVLMKVI ELYKQKITE TVLRLTNTLK QIDIKPFNFQ ILKFIDDAIK KLQTVDYKKL VDGINDFLDI  
 2401 MIKKLKSFDY NKFDVETNNK IRQATQKINE EIKALELPQK IEAAKQYIKE VYTVVSRYIE KLKDSRLAAT VNWNLNLISS  
 2481 TAIDELKSKI RFDLEDARKR IYEMDIPAEQ QRFLHKASQL YRVIVSFLVD KWDIISKIS VSAEKYNVKN MADHLNQFVK  
 2561 TGFIVPAIKL GVINIPAFEV SLRALQDATF KTPDFILPLT DLHVPSYQIN FKKLNEIRIP IRFSTPEFTI LNTIKVPSYT  
 2641 IDFNEIKLKI VRIIDQIMTS DFQLPATDQY FQEIKIKDLY FSDFLPEIN LPQLQISELL IPKLNLEFQ FPDIKIPEFQ  
 2721 LPRIPHTVTI PTFGKLSGTC RITSPFFTLT TNAGFQNVTA HPYSPEFVAS LSAIAVSKID YLAFTLTANT HLLAPELKKL  
 2801 ILKENLKFTH LYLKADHGSE VVFLTASVQG NAETTASFRS TRNAIELHNK LTVNLNKIIS MDSKTLYTHR LNIPKAQFTS  
 2881 QAELSNEIKT ALEAGHISVT STGKGDWKWT AHYSDGEGH ESKVSFTIER SIAAFIAENR INAKYLRVNM RMVYEYNLPS  
 2961 SSKLQVESTI ESPQLGQSVL NVQGTGNLVQ LKMELSGTHN AKVIGRTSGT INNDVSFSVQ PFEIKASANN NMNLKVSFPF  
 3041 KIVGKIESLN NYGLVLSPT QQVSWVAEGR FNQYRYTHNL SAGNNEDSTE AIISMNGEAN LEFLNIPISF PEQFVYPYLG  
 3121 KTPQVQAYSL WEETGLKGLL KTPKQSFDLN VKLQYKKNKD VHSFPIPLDR VHKTLSNYSIV NFNKYFERNR DHTLAFLTES  
 3201 YNQAKVKFDK YKVDTSVNQS PQIFTIPSYT IPLLNIQVSP FTAELPTFGY VLPKEMRTPD FTVPFVQYSM PSYTVVLPSL  
 3281 ELPVLHIPQG LRTLKLPNYR VSPLPNQIYI PAFGNVTYDF SFKSSVITLN TNAGFFNQSD IARLSSSSST SVIEALQYQL  
 3361 TGTTISITRKR GLKLATALSL KNKFVEGNHD STISFTKKNI EALVVTAKI MAPGLKVNIG QELKGNAKTM PISSKINLN  
 3441 YDVDNTYVNA KGAIHVQANL ESIISYISAD TSTSGFINGD FYEGKPFSGK LVHEANTYLN SKGIRSAMKF ETSSNSGDFW  
 3521 NFDAKENVAI EASTNRLYAL WDHSGENYLN YFPLPRTRGN QICRVTELEA SDIMSAAQI QVAQPNFLE ETSVNQAFSL  
 3601 TVNNGNQKIN WKSESQIHNF FLGHDLELAN DNVEARVGLS ASLGGHINFL REFTLPVYER SLWHILKLDL TTRPEEKQFL  
 3681 NASTNIVYTK NQDGYFFPIS ISQLADRFII KFPKAVAGI HVQFFTIGLH EFNVLERVNN TSFDINLPLL PKMQLDEITK  
 3761 YNNLGQNKIP YFELTVPKHP KLVTPQFTL PKRLFLGNIN IDLDVVANKI ADFDLPTITI PQQQIEIPVF TFTLPAGIYF  
 3841 PK**FGALSSSF**K IASPLYSAT WKTDLKNTKE AFEHSIDFTA NSPLQFLEYD LDGVTTYQYE GNRFTLNRQY DLAHPELSGK  
 3921 YKAVYITEGD RIVRDKASLD ITSPTFTDVQ MRYQGDDSRV STMISSSSAG TLRFLISLDS SILNSKIFYQ TQSNPQNEVE  
 4001 ILKSEISFKN PELIQIKTNW KEDAVTELLE GLKEKVPKMA DALYYTANKY HREHTGMEIS SAASKLKDTL RSNIDQTYVN  
 4081 TVNSISELEQ QLHEVTNQVT GKYEQIKTES QKLYHKAADQ ASQIEYDQIR TQFLDAIMDS IVEYHKQIKR LIDSAIEFLK  
 4161 VTRFQVPGPL GKHTGEELYV IITEKVAKAV DQSIARVQY FDSLITFVNE AEIKIPASSE IIKGSDILAE IKTFLTHVQK  
 4241 KVSQIFVGLR EIDFAQHRLR LKERIQQVFQ KIBELIKNLQ AQNYDHLKEQ TKQLFVNFLN ALNSLAGDVK YFSPRIENII  
 4321 QNTFSEIYNK LEELLHSIRD LRKEYFDPNV VGWLSKYYEV BEKFINWLKT FNTILEWHI KWINEAADLI TNLTDQAKEA  
 4401 LENQEKLAEF SKTAHEKIQY WSKVAKQSA EQNQVQKAKL QETYNHLFNS YEMLISETKR LIDLITIEKYT TFFQYLQKLL  
 4481 DWLEKVTADA LRPYIAVRQG ELRIDIPKPF NLSAIYQGGL SDEDLQQQQT ILANQ

Supporting Peptides:

| Peptide          | Uniq  | -10lgP   | Mass | Length | ppm      | m/z | z     | RT | Fraction | Scan     | Source File               | Area F1 | Area F2 | Area F3 | Area F4 | Area F5 | Area F6 | Area F7 |
|------------------|-------|----------|------|--------|----------|-----|-------|----|----------|----------|---------------------------|---------|---------|---------|---------|---------|---------|---------|
| K.SPEITITGR.L Y  | 49.73 | 972.5240 | 9    | 0.1    | 487.2693 | 2   | 33.18 | 7  |          | F7:9009  | 17112021_RID_2349_DP7.raw |         |         |         |         |         |         | 1.38    |
| K.FGALSSSF.K I Y | 40.73 | 942.4810 | 9    | -0.4   | 472.2476 | 2   | 38.95 | 7  |          | F7:10968 | 17112021_RID_2349_DP7.raw |         |         |         |         |         |         | 5.80    |

total 2 peptides

AJO70722.1  
[back to list](#)

[Protein Coverage](#) | [Supporting Peptides](#) |

Protein Coverage:

1 MGRFISVSFG CLVVFLSLSG TGADQDCPSD WSSHEGHCHYK VFNLRMNWAD AEKFCTEVVS GGHLLISLNSA EEVDPMIKLV  
81 FPIILK**FDFIW IGLR**DFWRDC HWGWSGDKVL DYKAWSDEPN CYVAKTVDYQ WLFRDCNRTS RFICKSRVPR

Supporting Peptides:

| Peptide         | Uniq  | -10lgP    | Mass | Length | ppm      | m/z | z     | RT | Fraction | Scan     | Source File               | Area F1 | Area F2 | Area F3 | Area F4 | Area F5 | Area F6 | Area F7 |
|-----------------|-------|-----------|------|--------|----------|-----|-------|----|----------|----------|---------------------------|---------|---------|---------|---------|---------|---------|---------|
| K.FDFIWIGLR.D Y | 51.10 | 1165.6284 | 9    | 0.3    | 583.8217 | 2   | 71.27 | 7  |          | F7:21945 | 17112021_RID_2349_DP7.raw |         |         |         |         |         |         | 0       |

total 1 peptides

XP\_029142225.1  
[back to list](#)

[Protein Coverage](#) | [Supporting Peptides](#) |

Protein Coverage:

1 MSEILMGVFG IWTKSSIFML SCLIEGGKNC NGPPRIENGDI IITLSEKRYR SGSSVEFRCQ RFYAMEGQKI SFCNNGTWTK  
81 VPICLDPCR I PTAELEKQKI EVKDGMDASE NIFVQHGHSI ELICRTGYVL AADSSQSASI IHCDGTTTPI PKCKEIIICNS  
161 PRISNGSFRP KRNIYHVGDL IQIQCYSGFT FEPDNRGQVV ECTKNGWSP SKCVLVNPLI VCEEPDDIAF GEIVTMEKAK  
241 YLENDRVQYR CYPGYVLEGL EWIQCKGQW TPRPPKCLAP CSITRQQLVT KNLFVFGSQR KSRFIQSNHS LQFQCSEGYV  
321 LVVPSVRKCV DGYMDLPLCI SERGKNCSDP **PRIENGDIITL LSEK**QYRSQS SVEFRCQRYI TIEGQNRSFC DNGTWTKVPI  
401 CLDPCMIPRA ELETQKIEVK GGMDASENIF VPRGHSIELT CRTGYVLAAD SSQACDGTPT PVIPKCKEIT CSSPRILKGS  
481 FRPQRNIYND GDLIRIQCDN GFTLEQDNGG QVAECTRNGW LPSPKCVQVE RTCKVSLHLG SFVPEQQSIQ INDKAKYICQ  
561 DGYTTSKGET EVETQCLTEG WSPEPECIRT CLKPPADNFI FNTTKPVFLP GDVLHYECKE EFEITKNSIS DTVVCTEEGW  
641 EPTPPRCVAF VCQAPFLENG AIDPRENVFQ HKMVVRFNCD TGFTRVGSES AQCYHFGWSP QPPVCKGIAS VCHAPFLENG  
721 AINPREDFVQ HKMVVRFNCD RGFIRVGSES AQCYHFGWSP QPPVCKENVK SCQASPRISH GMVTDERKAV HQHGDILLEVO  
801 CDISFALRGS KTIECVDGEW APLPSCIEEV KTCGPPRKIT RGIPVDAMSS IYRHGETVAY QCQQPSVSIG TNPACCLHGO  
881 WELPSCLETC PPPPQLPNAI NIAEMRIYRS EEEISFKCQG NFLLRGPPKI KCEDGKWQTP PRCLACEEPE DIDFGEIVTT  
961 EKAKYLENER VQYRCNPAYV LEGPEWIQCK GQKWTPHPPK CLAPCSITRQ QLATKNLFVFS GSQRKALLIQ SNHSRQFQCN  
1041 EGYVLVAPSV RMCVDGYMEL PLCISERGRN CSGPPRIENG DITTLSEKRY RSGSSVEFRC QKDYAMEDQN RSFCNDGTWT  
1121 KVPICLDPCV IPRAELESQM IELKDGIDVP ENTFVQRGHS IELTCRTGYV LAVDSSQSAS IHCDDGTTTPI IPKCKEITCN  
1201 SPRISNGSFL PQRITIHGDL LIRIRCESGF TFKPDNGEKV VECTKNGWSP PPKCVSRGSQ PPAMAHYHAV ACLKPGHVSQ  
1281 WPVHTCVRAA QVA

Supporting Peptides:

| Peptide            | Uniq  | -10lgP    | Mass | Length | ppm      | m/z | z     | RT | Fraction | Scan    | Source File               | Area F1 | Area F2 | Area F3  | Area F4 | Area F5 | Area F6 | Area F7 |
|--------------------|-------|-----------|------|--------|----------|-----|-------|----|----------|---------|---------------------------|---------|---------|----------|---------|---------|---------|---------|
| R.IENGDIITLSEK.Q Y | 64.45 | 1318.6616 | 12   | 0.5    | 660.3384 | 2   | 34.80 | 3  |          | F3:9504 | 17112021_RID_2349_DP3.raw |         |         | 9.5811E4 |         |         |         |         |

total 1 peptides

XP\_015677107.1  
[back to list](#)

[Protein Coverage](#) | [Supporting Peptides](#) |

Protein Coverage:

1 MKSWLLLVVV FLLWPGCSSQ NVCEEPDDID FGEIVTTEKA KYLENDRVQY RCYPGYVLEG PEWIQCKGQW WTPHPPKCLA  
81 PCIITRQQLA TKNLFVFGGQ RKTWIIQNNH SVQFQCNERH VLVVPSVRKC VDGMDLPLC LSERGGNCSG PPR**IENGDIIT**  
161 **TLSEK**RYRSQS SVEFKCQKY YAMEGQKRSE CDNGTWTKVP ICLDPCMIPR AELEKQKIEV KDGMASENI FVQRGHSIEL  
241 ICRTGYVLAA DSSQSASIIH CDGTPPVIPK CKEITCNSPR ILNGSFRSQR TIYHGDGLIR IQCDSGFTLE PDNGEKVVEG  
321 TRNGWSPSPK CVEIQCSPE VRKGRIEPRR SQYMYNDEIE IICHRRIFTT AIQRKYISKI TANGWSPSPL CEEIRCSPPE  
401 VRNGYIRPTQ SQYMHNDEIE ITCFRWPFCK GDRKRSRNCI ANGWDPSPSC

Supporting Peptides:

| Peptide            | Uniq  | -10lgP    | Mass | Length | ppm      | m/z | z     | RT | Fraction | Scan    | Source File               | Area F1 | Area F2 | Area F3  | Area F4 | Area F5 | Area F6 | Area F7 |
|--------------------|-------|-----------|------|--------|----------|-----|-------|----|----------|---------|---------------------------|---------|---------|----------|---------|---------|---------|---------|
| R.IENGDIITLSEK.R Y | 64.45 | 1318.6616 | 12   | 0.5    | 660.3384 | 2   | 34.80 | 3  |          | F3:9504 | 17112021_RID_2349_DP3.raw |         |         | 9.5811E4 |         |         |         |         |

total 1 peptides

TRINITY\_DN1914  
[back to list](#)

[Protein Coverage](#) | [Supporting Peptides](#) |

Protein Coverage:

|     |                    |            |            |            |            |            |            |                      |
|-----|--------------------|------------|------------|------------|------------|------------|------------|----------------------|
| 1   | MKNWLLLVAA         | FLLWPCCSSQ | NACEEPEDID | FGEIVSIEKA | KYLENDRVQY | RCNPAYVLEG | PEWIQCKGQK | WTPHPPKCLA           |
| 81  | PCSITRQQLT         | TKNLFVFGSQ | RKARLIQSNH | SLQFQCNEGY | VLVAPSVRKC | VDGYMEFPLC | ISERAGNCRG | PPRI <b>IENTGDIT</b> |
| 161 | <b>TLSEK</b> QYRSG | SSVEFRCQKH | YAMEGQNRSF | CDNGTWTKVP | ICLDPCVIPR | VELESQMIEL | EDGIDVPENI | FVQRGHSIEL           |
| 241 | TCRTGYVLAV         | NSSQSASIIH | CDGTRPVIPK | CKEITCHSPR | ISNGSFRPQR | TIYHDGDLIR | IQCDSGFTFE | RDNGEEVVEC           |
| 321 | TKNGWSPPPK         | CVTACTTSEE | DMREHNIKLK | WAGNKIYST  | DGNIIEFQCI | RGHKLHPSYR | TLRINCVNGK | FDYPRCIPI            |

Supporting Peptides:

| Peptide           | Uniq -10lgP | Mass      | Length | ppm | m/z      | z | RT    | Fraction | Scan    | Source File               | Area F1 | Area F2 | Area F3  | Area F4 | Area F5 |
|-------------------|-------------|-----------|--------|-----|----------|---|-------|----------|---------|---------------------------|---------|---------|----------|---------|---------|
| R.IENGDTTLSEK.Q Y | 64.45       | 1318.6616 | 12     | 0.5 | 660.3384 | 2 | 34.80 | 3        | F3:9504 | 17112021_RID_2349_DP3.raw |         |         | 9.5811E4 |         |         |
| total 1 peptides  |             |           |        |     |          |   |       |          |         |                           |         |         |          |         |         |

TRINITY\_DN1889

[back to list](#)

[Protein Coverage](#) | [Supporting Peptides](#) |

Protein Coverage:

|     |            |            |            |            |                   |                     |            |            |
|-----|------------|------------|------------|------------|-------------------|---------------------|------------|------------|
| 1   | MFRCLLLLCL | AGLLVLSEAG | GRLPALQAAL | EQVLEDFHGR | <b>SLVQAAFLGE</b> | <b>TARE</b> ELVEVLP | MGTYVQLEVD | LVQTVCRKHQ |
| 81  | WRSQNCQIKA | GRRRQKCLAC | FKFDDNNNPG | RLLNKSLRCL | SEQNPLFQEA        | RRRQEAECQA          | IKAANEDRYL | PGKFAFSVGL |
| 161 | PS         |            |            |            |                   |                     |            |            |

Supporting Peptides:

| Peptide             | Uniq -10lgP | Mass      | Length | ppm | m/z      | z | RT    | Fraction | Scan     | Source File               | Area F1 | Area F2 | Area F3 | Area F4 | Area F5 |
|---------------------|-------------|-----------|--------|-----|----------|---|-------|----------|----------|---------------------------|---------|---------|---------|---------|---------|
| R.SLVQAAFLGETAR.E Y | 63.54       | 1361.7302 | 13     | 1.1 | 681.8732 | 2 | 50.30 | 7        | F7:14849 | 17112021_RID_2349_DP7.raw |         |         |         |         |         |
| total 1 peptides    |             |           |        |     |          |   |       |          |          |                           |         |         |         |         |         |

CCH15044.1

[back to list](#)

[Protein Coverage](#) | [Supporting Peptides](#) |

Protein Coverage:

|    |            |            |            |            |        |                   |       |            |            |
|----|------------|------------|------------|------------|--------|-------------------|-------|------------|------------|
| 1  | MSSGGLLLLL | GLLTLWAEIT | PVSSQDRPKF | CYLPADPAEC | NAYMPR | <b>FYYD SASNK</b> | CKEFI | YGGCRGNANN | FKNRAECRHT |
| 81 | CVASRKGIQP | RIASN      |            |            |        |                   |       |            |            |

Supporting Peptides:

| Peptide          | Uniq -10lgP | Mass      | Length | ppm | m/z      | z | RT    | Fraction | Scan    | Source File               | Area F1  | Area F2  | Area F3  | Area F4 | Area F5 |
|------------------|-------------|-----------|--------|-----|----------|---|-------|----------|---------|---------------------------|----------|----------|----------|---------|---------|
| R.FYYDSASNK.C Y  | 63.13       | 1093.4716 | 9      | 0.3 | 547.7432 | 2 | 28.93 | 5        | F5:7517 | 17112021_RID_2349_DP5.raw | 8.2206E5 | 5.5535E5 | 2.9889E6 | 2.3037  |         |
| total 1 peptides |             |           |        |     |          |   |       |          |         |                           |          |          |          |         |         |

I2G9B4.1

[back to list](#)

[Protein Coverage](#) | [Supporting Peptides](#) |

Protein Coverage:

|    |            |            |            |            |        |                   |       |            |            |
|----|------------|------------|------------|------------|--------|-------------------|-------|------------|------------|
| 1  | MSSGGLLLLL | GLLTLWAEIT | PVSSQDRPKF | CYLPADPAEC | NAYMPR | <b>FYYD SASNK</b> | CKEFI | YGGCRGNANN | FKNRAECRHT |
| 81 | CVASRKGIQP | RIASN      |            |            |        |                   |       |            |            |

Supporting Peptides:

| Peptide          | Uniq -10lgP | Mass      | Length | ppm | m/z      | z | RT    | Fraction | Scan    | Source File               | Area F1  | Area F2  | Area F3  | Area F4 | Area F5 |
|------------------|-------------|-----------|--------|-----|----------|---|-------|----------|---------|---------------------------|----------|----------|----------|---------|---------|
| R.FYYDSASNK.C Y  | 63.13       | 1093.4716 | 9      | 0.3 | 547.7432 | 2 | 28.93 | 5        | F5:7517 | 17112021_RID_2349_DP5.raw | 8.2206E5 | 5.5535E5 | 2.9889E6 | 2.3037  |         |
| total 1 peptides |             |           |        |     |          |   |       |          |         |                           |          |          |          |         |         |

AMH40736.1

[back to list](#)

[Protein Coverage](#) | [Supporting Peptides](#) |

Protein Coverage:

|    |            |            |            |            |        |                   |       |            |            |
|----|------------|------------|------------|------------|--------|-------------------|-------|------------|------------|
| 1  | MSSGGLLLLL | GLLTLWAEIT | PISGRDRPKF | CHLPADPGIC | KAHTPR | <b>FYYD SASNK</b> | CKQFS | FGGCPGNANN | SKTWDECRHT |
| 81 | CVASGKGIQP |            |            |            |        |                   |       |            |            |

Supporting Peptides:

| Peptide          | Uniq -10lgP | Mass      | Length | ppm | m/z      | z | RT    | Fraction | Scan    | Source File               | Area F1  | Area F2  | Area F3  | Area F4 | Area F5 |
|------------------|-------------|-----------|--------|-----|----------|---|-------|----------|---------|---------------------------|----------|----------|----------|---------|---------|
| R.FYYDSASNK.C Y  | 63.13       | 1093.4716 | 9      | 0.3 | 547.7432 | 2 | 28.93 | 5        | F5:7517 | 17112021_RID_2349_DP5.raw | 8.2206E5 | 5.5535E5 | 2.9889E6 | 2.3037  |         |
| total 1 peptides |             |           |        |     |          |   |       |          |         |                           |          |          |          |         |         |

AMH40741.1

[back to list](#)

[Protein Coverage](#) | [Supporting Peptides](#) |

8/2/22, 12:12 PM

proteins

Protein Coverage:

1 MSSGGLLLLL GLLTLWAELT PVSGQDHPKF CYLPADPGRC KAHIPRFYYD SASNKC

81 CGASAMGRPT

Supporting Peptides:

| Peptide          | Uniq -10lgP | Mass      | Length | ppm | m/z      | z | RT    | Fraction | Scan                              | Source File                | Area F1 | Area F2 | Area F3 | Area I |
|------------------|-------------|-----------|--------|-----|----------|---|-------|----------|-----------------------------------|----------------------------|---------|---------|---------|--------|
| R.FYYDSASNK.C Y  | 63.13       | 1093.4716 | 9      | 0.3 | 547.7432 | 2 | 28.93 | 5        | F5:7517 17112021_RID_2349_DP5.raw | 8.2206E5 5.5535E5 2.9889E6 | 2.3037  |         |         |        |
| total 1 peptides |             |           |        |     |          |   |       |          |                                   |                            |         |         |         |        |

P00991.2

[back to list](#)

[Protein Coverage](#) | [Supporting Peptides](#) |

Protein Coverage:

1 MSSGGLLLLL GLLTLWAELT PVSGQDHPKF CYLPADPGRC KAHIPRFYYD SASNKC

81 CGASAMGRPT

Supporting Peptides:

| Peptide          | Uniq -10lgP | Mass      | Length | ppm | m/z      | z | RT    | Fraction | Scan                              | Source File                | Area F1 | Area F2 | Area F3 | Area I |
|------------------|-------------|-----------|--------|-----|----------|---|-------|----------|-----------------------------------|----------------------------|---------|---------|---------|--------|
| R.FYYDSASNK.C Y  | 63.13       | 1093.4716 | 9      | 0.3 | 547.7432 | 2 | 28.93 | 5        | F5:7517 17112021_RID_2349_DP5.raw | 8.2206E5 5.5535E5 2.9889E6 | 2.3037  |         |         |        |
| total 1 peptides |             |           |        |     |          |   |       |          |                                   |                            |         |         |         |        |

AAP04484.1

[back to list](#)

[Protein Coverage](#) | [Supporting Peptides](#) |

Protein Coverage:

1 MSSGGLLLLL GLLTLWAELT PVSGQDHPKF CYLPADPGRC KAHIPRFYYD SASNKC

81 CGASAMGRPT

Supporting Peptides:

| Peptide          | Uniq -10lgP | Mass      | Length | ppm | m/z      | z | RT    | Fraction | Scan                              | Source File                | Area F1 | Area F2 | Area F3 | Area I |
|------------------|-------------|-----------|--------|-----|----------|---|-------|----------|-----------------------------------|----------------------------|---------|---------|---------|--------|
| R.FYYDSASNK.C Y  | 63.13       | 1093.4716 | 9      | 0.3 | 547.7432 | 2 | 28.93 | 5        | F5:7517 17112021_RID_2349_DP5.raw | 8.2206E5 5.5535E5 2.9889E6 | 2.3037  |         |         |        |
| total 1 peptides |             |           |        |     |          |   |       |          |                                   |                            |         |         |         |        |

AAP04485.1

[back to list](#)

[Protein Coverage](#) | [Supporting Peptides](#) |

Protein Coverage:

1 MSSGGLLLLL GLLTLWAELT PVSTRDRPKF CYLPADPGRC LAYMPSFYYD SASNCK

81 CVASGIQPRI ASN

Supporting Peptides:

| Peptide          | Uniq -10lgP | Mass      | Length | ppm | m/z      | z | RT    | Fraction | Scan                              | Source File                | Area F1 | Area F2 | Area F3 | Area I |
|------------------|-------------|-----------|--------|-----|----------|---|-------|----------|-----------------------------------|----------------------------|---------|---------|---------|--------|
| S.FYYDSASNK.C Y  | 63.13       | 1093.4716 | 9      | 0.3 | 547.7432 | 2 | 28.93 | 5        | F5:7517 17112021_RID_2349_DP5.raw | 8.2206E5 5.5535E5 2.9889E6 | 2.3037  |         |         |        |
| total 1 peptides |             |           |        |     |          |   |       |          |                                   |                            |         |         |         |        |

P00992.2

[back to list](#)

[Protein Coverage](#) | [Supporting Peptides](#) |

Protein Coverage:

1 MSSGGLLLLL GLLTLWAELT PVSTRDRPKF CYLPADPGRC LAYMPSFYYD SASNCK

81 CVASGIQPRI ASN

Supporting Peptides:

| Peptide          | Uniq -10lgP | Mass      | Length | ppm | m/z      | z | RT    | Fraction | Scan                              | Source File                | Area F1 | Area F2 | Area F3 | Area I |
|------------------|-------------|-----------|--------|-----|----------|---|-------|----------|-----------------------------------|----------------------------|---------|---------|---------|--------|
| S.FYYDSASNK.C Y  | 63.13       | 1093.4716 | 9      | 0.3 | 547.7432 | 2 | 28.93 | 5        | F5:7517 17112021_RID_2349_DP5.raw | 8.2206E5 5.5535E5 2.9889E6 | 2.3037  |         |         |        |
| total 1 peptides |             |           |        |     |          |   |       |          |                                   |                            |         |         |         |        |

AMH40733.1

[back to list](#)

[Protein Coverage](#) | [Supporting Peptides](#) |

Protein Coverage:

1 MSSGGLLLLL GLLTLWAELT PVSTRDRPKF CYLPADPGRC LAYIPSFYYD SASNCK

81 CVASGIQPRI ASN

Supporting Peptides:

| Peptide          | Uniq -10lgP | Mass      | Length | ppm | m/z      | z | RT    | Fraction | Scan                              | Source File                | Area F1 | Area F2 | Area F3 | Area I |
|------------------|-------------|-----------|--------|-----|----------|---|-------|----------|-----------------------------------|----------------------------|---------|---------|---------|--------|
| S.FYYDSASNK.C Y  | 63.13       | 1093.4716 | 9      | 0.3 | 547.7432 | 2 | 28.93 | 5        | F5:7517 17112021_RID_2349_DP5.raw | 8.2206E5 5.5535E5 2.9889E6 | 2.3037  |         |         |        |
| total 1 peptides |             |           |        |     |          |   |       |          |                                   |                            |         |         |         |        |

file:///C:/Users/senra/AppData/Local/Temp/Rar\$EXa4564.42349/Supplementary File S1/protein.html

196/224

| Peptide          | Uniq -10lgP | Mass      | Length | ppm | m/z      | z | RT    | Fraction | Scan    | Source File               | Area F1  | Area F2  | Area F3  | Area F4  |
|------------------|-------------|-----------|--------|-----|----------|---|-------|----------|---------|---------------------------|----------|----------|----------|----------|
| S.FYYDSASNK.C Y  | 63.13       | 1093.4716 | 9      | 0.3 | 547.7432 | 2 | 28.93 | 5        | F5:7517 | 17112021_RID_2349_DP5.raw | 8.2206E5 | 5.5535E5 | 2.9889E6 | 2.3037E6 |
| total 1 peptides |             |           |        |     |          |   |       |          |         |                           |          |          |          |          |

AMH40738.1  
[back to list](#)

| [Protein Coverage](#) | [Supporting Peptides](#) |

|                   |            |          |    |            |            |        |            |       |            |            |  |  |  |
|-------------------|------------|----------|----|------------|------------|--------|------------|-------|------------|------------|--|--|--|
| Protein Coverage: |            |          |    |            |            |        |            |       |            |            |  |  |  |
| 1                 | MSSGGLLLLL | GLLTLWAE | LT | PVSTRDRPKF | CYLPADPGRC | LAYIPS | FYYD SASNK | CKKFI | YGGCRGNANN | FKTWDECRHT |  |  |  |
| 81                | CVASGIQPRI | ASN      |    |            |            |        |            |       |            |            |  |  |  |

Supporting Peptides:

| Peptide          | Uniq -10lgP | Mass      | Length | ppm | m/z      | z | RT    | Fraction | Scan    | Source File               | Area F1  | Area F2  | Area F3  | Area F4  |
|------------------|-------------|-----------|--------|-----|----------|---|-------|----------|---------|---------------------------|----------|----------|----------|----------|
| S.FYYDSASNK.C Y  | 63.13       | 1093.4716 | 9      | 0.3 | 547.7432 | 2 | 28.93 | 5        | F5:7517 | 17112021_RID_2349_DP5.raw | 8.2206E5 | 5.5535E5 | 2.9889E6 | 2.3037E6 |
| total 1 peptides |             |           |        |     |          |   |       |          |         |                           |          |          |          |          |

AMH40740.1  
[back to list](#)

| [Protein Coverage](#) | [Supporting Peptides](#) |

|                   |            |          |    |            |            |        |            |       |            |            |  |  |  |
|-------------------|------------|----------|----|------------|------------|--------|------------|-------|------------|------------|--|--|--|
| Protein Coverage: |            |          |    |            |            |        |            |       |            |            |  |  |  |
| 1                 | MSSGGLLLLL | GLLTLWAE | LT | PVSTRDRPKF | CYLPADPGRC | LAYIPS | FYYD SASNK | CKKFI | YGGCRGNANN | FKTWDECRHT |  |  |  |
| 81                | CVASGIQPRI | ASN      |    |            |            |        |            |       |            |            |  |  |  |

Supporting Peptides:

| Peptide          | Uniq -10lgP | Mass      | Length | ppm | m/z      | z | RT    | Fraction | Scan    | Source File               | Area F1  | Area F2  | Area F3  | Area F4  |
|------------------|-------------|-----------|--------|-----|----------|---|-------|----------|---------|---------------------------|----------|----------|----------|----------|
| S.FYYDSASNK.C Y  | 63.13       | 1093.4716 | 9      | 0.3 | 547.7432 | 2 | 28.93 | 5        | F5:7517 | 17112021_RID_2349_DP5.raw | 8.2206E5 | 5.5535E5 | 2.9889E6 | 2.3037E6 |
| total 1 peptides |             |           |        |     |          |   |       |          |         |                           |          |          |          |          |

E5AJX3.1  
[back to list](#)

| [Protein Coverage](#) | [Supporting Peptides](#) |

|                   |            |          |    |            |            |        |            |       |            |            |  |  |  |
|-------------------|------------|----------|----|------------|------------|--------|------------|-------|------------|------------|--|--|--|
| Protein Coverage: |            |          |    |            |            |        |            |       |            |            |  |  |  |
| 1                 | MSSGGLLLLL | GLLTLWAE | LT | PVSSRDRPKF | CYLPAEPGEC | NAYMPS | FYYD SASNK | CKKFI | YGGCRGNANN | FKTRDECHHT |  |  |  |
| 81                | CVASGKGIQP | RIGSN    |    |            |            |        |            |       |            |            |  |  |  |

Supporting Peptides:

| Peptide          | Uniq -10lgP | Mass      | Length | ppm | m/z      | z | RT    | Fraction | Scan    | Source File               | Area F1  | Area F2  | Area F3  | Area F4  |
|------------------|-------------|-----------|--------|-----|----------|---|-------|----------|---------|---------------------------|----------|----------|----------|----------|
| S.FYYDSASNK.C Y  | 63.13       | 1093.4716 | 9      | 0.3 | 547.7432 | 2 | 28.93 | 5        | F5:7517 | 17112021_RID_2349_DP5.raw | 8.2206E5 | 5.5535E5 | 2.9889E6 | 2.3037E6 |
| total 1 peptides |             |           |        |     |          |   |       |          |         |                           |          |          |          |          |

CBW30779.1  
[back to list](#)

| [Protein Coverage](#) | [Supporting Peptides](#) |

|                   |            |          |    |            |            |        |            |       |            |            |  |  |  |
|-------------------|------------|----------|----|------------|------------|--------|------------|-------|------------|------------|--|--|--|
| Protein Coverage: |            |          |    |            |            |        |            |       |            |            |  |  |  |
| 1                 | MSSGGLLLLL | GLLTLWAE | LT | PVSSRDRPKF | CYLPAEPGEC | NAYMPS | FYYD SASNK | CKKFI | YGGCRGNANN | FKTRDECHHT |  |  |  |
| 81                | CVASGKGIQP | RIGSN    |    |            |            |        |            |       |            |            |  |  |  |

Supporting Peptides:

| Peptide          | Uniq -10lgP | Mass      | Length | ppm | m/z      | z | RT    | Fraction | Scan    | Source File               | Area F1  | Area F2  | Area F3  | Area I |
|------------------|-------------|-----------|--------|-----|----------|---|-------|----------|---------|---------------------------|----------|----------|----------|--------|
| S.FYYDSASNK.C Y  | 63.13       | 1093.4716 | 9      | 0.3 | 547.7432 | 2 | 28.93 | 5        | F5:7517 | 17112021_RID_2349_DP5.raw | 8.2206E5 | 5.5535E5 | 2.9889E6 | 2.3037 |
| total 1 peptides |             |           |        |     |          |   |       |          |         |                           |          |          |          |        |

TRINITY\_DN151  
[back to list](#)

| [Protein Coverage](#) | [Supporting Peptides](#) |

|                   |            |            |            |            |            |            |    |                 |   |           |  |  |  |
|-------------------|------------|------------|------------|------------|------------|------------|----|-----------------|---|-----------|--|--|--|
| Protein Coverage: |            |            |            |            |            |            |    |                 |   |           |  |  |  |
| 1                 | MQQQNPEFKE | QDPSFSHLVQ | PRKLNKTSQM | ALDHVQTEHA | RRAPEFCYLP | ADPAECNAYM | PR | <b>FFYDSASN</b> | K | CKEFIYGGC |  |  |  |
| 81                | RGNANNFKNR | AECRHTCVAS | RKGIQPRIAS | N          |            |            |    |                 |   |           |  |  |  |

Supporting Peptides:

| Peptide          | Uniq  | -10lgP    | Mass | Length | ppm      | m/z | z     | RT | Fraction | Scan                      | Source File | Area F1  | Area F2  | Area F3 | Area I |
|------------------|-------|-----------|------|--------|----------|-----|-------|----|----------|---------------------------|-------------|----------|----------|---------|--------|
| R.FYYDSASNK.C Y  | 63.13 | 1093.4716 | 9    | 0.3    | 547.7432 | 2   | 28.93 | 5  | F5:7517  | 17112021_RID_2349_DP5.raw | 8.2206E5    | 5.5535E5 | 2.9889E6 | 2.3037  |        |
| total 1 peptides |       |           |      |        |          |     |       |    |          |                           |             |          |          |         |        |

Q6T269.1  
[back to list](#)

[Protein Coverage](#) | [Supporting Peptides](#) |

Protein Coverage:

|    |            |            |            |            |                   |            |            |            |            |
|----|------------|------------|------------|------------|-------------------|------------|------------|------------|------------|
| 1  | PLRPGTEKHT | FFPPAEFCNL | PADLGPCKNY | TGR        | <b>FFYDSAS NK</b> | CEVFIYGG   | CPGNANNFKT | REECRKTCVE | ICILPAELGP |
| 81 | CDEYTGRFYY | DSASNKCEVF | IYGGCQGNAN | NFKTRDECRK | TCVEICILPA        | ELGPCDEYTG | RLLLRLGIKQ | M          |            |

Supporting Peptides:

| Peptide          | Uniq -10lgP | Mass      | Length | ppm | m/z      | z | RT    | Fraction | Scan    | Source File               | Area F1  | Area F2  | Area F3  | Area F4  |
|------------------|-------------|-----------|--------|-----|----------|---|-------|----------|---------|---------------------------|----------|----------|----------|----------|
| R.FFYDSASNK.C Y  | 63.13       | 1093.4716 | 9      | 0.3 | 547.7432 | 2 | 28.93 | 5        | F5:7517 | 17112021_RID_2349_DP5.raw | 8.2206E5 | 5.5535E5 | 2.9889E6 | 2.3037E6 |
| total 1 peptides |             |           |        |     |          |   |       |          |         |                           |          |          |          |          |

AAR19275.1

[back to list](#)

[Protein Coverage](#) | [Supporting Peptides](#) |

Protein Coverage:

|    |            |            |            |            |                   |            |            |            |            |
|----|------------|------------|------------|------------|-------------------|------------|------------|------------|------------|
| 1  | PLRPGTEKHT | FFPPAEFCNL | PADLGPCKNY | TGR        | <b>FFYDSAS NK</b> | CEVFIYGG   | CPGNANNFKT | REECRKTCVE | ICILPAELGP |
| 81 | CDEYTGRFYY | DSASNKCEVF | IYGGCQGNAN | NFKTRDECRK | TCVEICILPA        | ELGPCDEYTG | RLLLRLGIKQ | M          |            |

Supporting Peptides:

| Peptide          | Uniq -10lgP | Mass      | Length | ppm | m/z      | z | RT    | Fraction | Scan    | Source File               | Area F1  | Area F2  | Area F3  | Area F4  |
|------------------|-------------|-----------|--------|-----|----------|---|-------|----------|---------|---------------------------|----------|----------|----------|----------|
| R.FYYDSASNK.C Y  | 63.13       | 1093.4716 | 9      | 0.3 | 547.7432 | 2 | 28.93 | 5        | F5:7517 | 17112021_RID_2349_DP5.raw | 8.2206E5 | 5.5535E5 | 2.9889E6 | 2.3037E6 |
| total 1 peptides |             |           |        |     |          |   |       |          |         |                           |          |          |          |          |

LAA93895.1

[back to list](#)

[Protein Coverage](#) | [Supporting Peptides](#) |

Protein Coverage:

|     |            |            |            |            |            |            |           |                       |  |
|-----|------------|------------|------------|------------|------------|------------|-----------|-----------------------|--|
| 1   | YEELQDTAGR | HNDDVRNAKH | EISELNRHVQ | RLKAEIEGVK | KQCGNLKGKI | AEAEDRGELA | LKDARQK   | <b>LAE LEEALQKAKQ</b> |  |
| 81  | EMAKQLKEYQ | QLLNVKISLD | IEIATYKKLL | EGEYRLAND  | AGDAVNMSVI | SSHISRGSA  | GSGLGYGSL | SMGGGSCFAV            |  |
| 161 | GGGGGCSNIV | DLGNGSCSSM | KFIS       |            |            |            |           |                       |  |

Supporting Peptides:

| Peptide          | Uniq -10lgP | Mass      | Length | ppm | m/z      | z | RT    | Fraction | Scan     | Source File               | Area F1  | Area F2 | Area F3 | Area F4  | Area F5 |
|------------------|-------------|-----------|--------|-----|----------|---|-------|----------|----------|---------------------------|----------|---------|---------|----------|---------|
| K.LAELEEALQK.A Y | 61.86       | 1142.6183 | 10     | 0.8 | 572.3169 | 2 | 41.52 | 4        | F4:11731 | 17112021_RID_2349_DP4.raw | 2.8419E4 |         |         | 7.8314E5 | 1.0     |
| total 1 peptides |             |           |        |     |          |   |       |          |          |                           |          |         |         |          |         |

CAJ34939.1

[back to list](#)

[Protein Coverage](#) | [Supporting Peptides](#) |

Protein Coverage:

|    |            |            |         |                      |             |        |            |            |            |
|----|------------|------------|---------|----------------------|-------------|--------|------------|------------|------------|
| 1  | MIQVLLVIIC | LAVFPFQGSS | KT      | <b>SGNVND YEYVNP</b> | <b>GLPK</b> | GAVEEK | HEPMKGNTLQ | KFPLCTTGPC | CRQCKLKPAG |
| 81 | TTCWKTSRTS | HYCTGKSCDC | PSYPGNG |                      |             |        |            |            |            |

Supporting Peptides:

| Peptide                | Uniq -10lgP | Mass      | Length | ppm  | m/z       | z | RT    | Fraction | Scan     | Source File               | Area F1 | Area F2 | Area F3 | Area F4 | Area F5 |
|------------------------|-------------|-----------|--------|------|-----------|---|-------|----------|----------|---------------------------|---------|---------|---------|---------|---------|
| K.SGNVNDYEYVNPGLPK.G Y | 61.72       | 2059.0222 | 20     | -0.3 | 1030.5181 | 2 | 48.96 | 7        | F7:14386 | 17112021_RID_2349_DP7.raw |         |         |         |         |         |
| total 1 peptides       |             |           |        |      |           |   |       |          |          |                           |         |         |         |         |         |

Q3BK14.1

[back to list](#)

[Protein Coverage](#) | [Supporting Peptides](#) |

Protein Coverage:

|    |            |            |         |                      |             |        |            |            |            |
|----|------------|------------|---------|----------------------|-------------|--------|------------|------------|------------|
| 1  | MIQVLLVIIC | LAVFPFQGSS | KT      | <b>SGNVND YEYVNP</b> | <b>GLPK</b> | GAVEEK | HEPMKGNTLQ | KFPLCTTGPC | CRQCKLKPAG |
| 81 | TTCWKTSRTS | HYCTGKSCDC | PSYPGNG |                      |             |        |            |            |            |

Supporting Peptides:

| Peptide                | Uniq -10lgP | Mass      | Length | ppm  | m/z       | z | RT    | Fraction | Scan     | Source File               | Area F1 | Area F2 | Area F3 | Area F4 | Area F5 |
|------------------------|-------------|-----------|--------|------|-----------|---|-------|----------|----------|---------------------------|---------|---------|---------|---------|---------|
| K.SGNVNDYEYVNPGLPK.G Y | 61.72       | 2059.0222 | 20     | -0.3 | 1030.5181 | 2 | 48.96 | 7        | F7:14386 | 17112021_RID_2349_DP7.raw |         |         |         |         |         |
| total 1 peptides       |             |           |        |      |           |   |       |          |          |                           |         |         |         |         |         |

TRINITY\_DN160

[back to list](#)

[Protein Coverage](#) | [Supporting Peptides](#) |

Protein Coverage:

|    |            |            |            |            |            |         |                      |             |        |
|----|------------|------------|------------|------------|------------|---------|----------------------|-------------|--------|
| 1  | LASHSQREKN | SGWLESRKRL | PVFKPNPASK | MIQVLLVIIC | LAVFPFQGSS | KT      | <b>SGNVND YEYVNP</b> | <b>GLPK</b> | GAVEEK |
| 81 | HEPMKGNTLQ | KFPLCTTGPC | CRQCKLKPAG | TTCWKTSRTS | HYCTGKSCDC | PMYPGNG |                      |             |        |

Supporting Peptides:

| Peptide                   | Uniq -10lgP | Mass      | Length | ppm  | m/z       | z | RT    | Fraction | Scan     | Source File               | Area F1 | Area F2 | Area F3 |
|---------------------------|-------------|-----------|--------|------|-----------|---|-------|----------|----------|---------------------------|---------|---------|---------|
| K.SGNVNDYEVVNPGLTGLPK.G Y | 61.72       | 2059.0222 | 20     | -0.3 | 1030.5181 | 2 | 48.96 | 7        | F7:14386 | 17112021_RID_2349_DP7.raw |         |         |         |
| total 1 peptides          |             |           |        |      |           |   |       |          |          |                           |         |         |         |

JAS05406.1  
[back to list](#)

[Protein Coverage](#) | [Supporting Peptides](#) |  
Protein Coverage:

|     |            |            |            |            |            |             |             |            |
|-----|------------|------------|------------|------------|------------|-------------|-------------|------------|
| 1   | MIQVLLVTIC | LAVFPYQGSS | IILESGNVND | YEVVYPRKVT | AFPKGAVQPK | YEDAMQYEFK  | VNGESVVLHL  | EKNKGLFSKD |
| 81  | YSETHYSPDG | REITTYPPAE | DHCYYHGRIE | NDADSTASIS | ACNGLKGHFK | LQGKIYLIIEP | LKLSDESEAH  | VYKYENVEKE |
| 161 | DEAPKMGCVT | QNWKSYEPIK | KPSQLVVTAE | QQRIAKRYVE | FVIVVDHGMV | TKHNETLRTW  | VFQIVNTINE  | IYIPLNIRFA |
| 241 | LVGLEIWSNG | DKINVQSSAH | NTLHLFGNWR | RRVLLKRRRH | DNAQLLTSID | FDGQTVGLAH  | VSSMCNQKLS  | TGVIQDHSAI |
| 321 | NLLVAVTMAH | ELGHNLGMDH | DGNQCHCDAP | SCVMSARLRE | RPSYGFSNCS | QNEYQMFIIN  | YNPQCILNEP  | LPTDIVSPPV |
| 401 | CGNELLEVGE | ECDCGSPNNC | QDPCCDATTC | KQHSWVECES | GECCEQCRFK | GAGTECRAAS  | SECEDIAESCT | GQSADCPSTD |
| 481 | LHRNGQPCLN | NHGYCYNGMC | PIMDHQCIAL | YGADATVAED | ACFDSNLQGG | GNFYCRRENG  | RIFPCAPQDV  | KCGRLFCFKD |
| 561 | HYSCQYQYSG | DPDFGMVDHG | TK         | CADGKVCN   | NRRQVDVTTA | Y           |             |            |

Supporting Peptides:

| Peptide            | Uniq -10lgP | Mass      | Length | ppm | m/z      | z | RT    | Fraction | Scan    | Source File               | Area F1  | Area F2 | Area F3 | Area F4 | A |
|--------------------|-------------|-----------|--------|-----|----------|---|-------|----------|---------|---------------------------|----------|---------|---------|---------|---|
| G.DPDFGMVDHGTK.C Y | 60.18       | 1317.5659 | 12     | 1.0 | 659.7909 | 2 | 34.72 | 4        | F4:9473 | 17112021_RID_2349_DP4.raw | 2.6453E5 |         |         | 1.04E6  |   |
| total 1 peptides   |             |           |        |     |          |   |       |          |         |                           |          |         |         |         |   |

JAS05289.1  
[back to list](#)

[Protein Coverage](#) | [Supporting Peptides](#) |  
Protein Coverage:

|     |             |            |            |            |            |             |             |             |
|-----|-------------|------------|------------|------------|------------|-------------|-------------|-------------|
| 1   | MIEVLLVTIC  | LAVFPYQGSS | IILESGNVND | YEVVYPRKVT | ALPKGAVQPN | YEDAMQYEFK  | VNGESVVLHL  | EKNKELFSEN  |
| 81  | YSETHYSPDG  | REITTYPPAE | DHCYYHGRIE | NDADSTASIS | ACNGLKGHFK | LQGEMYLIIEP | LELPDSEAH   | VFKYENVEKE  |
| 161 | DEAPKMGCVT  | QTNWKSYPEI | KKPSHLVVTA | EQQLRTKRYV | ELVIVADHGM | FMKHNETLRT  | WVFQMVNTIN  | EIYIPLNIRF  |
| 241 | ALVGLEIWSN  | GDKITVQSSA | HNTLHLFGNW | RKRVLKRRKH | HDNAQLLTSI | DFDGRVTVGLA | HVSSMCNQKL  | STGVIQDHSA  |
| 321 | INLVMAVTMA  | HELGHNLGMD | HDIKYCTCGA | PACVMGNTLS | EQPSYGFSNC | SQNQYQTFII  | NYNPQCILNE  | PLPTDIVSPV  |
| 401 | VCGNELLEVGE | EECDGSPNPT | CRDPCCDATT | CKQHSWVECE | SGECCEQCKF | KGAGTECRAA  | RSECEDIAESC | TGQSADCPSTD |
| 481 | DLHRNGQPCL  | NNHGYCYNGM | CPIMDHQCIA | LYGADATVAP | DACFDNFKLG | QDNFYCRREK  | ARIFPCAPQD  | VKCGRLFCF   |
| 561 | GHYSCQYQYS  | G          | DPDFGMVDH  | GTK        | CADGKVC    | KNRQVDVTT   | AY          |             |

Supporting Peptides:

| Peptide            | Uniq -10lgP | Mass      | Length | ppm | m/z      | z | RT    | Fraction | Scan    | Source File               | Area F1  | Area F2 | Area F3 | Area F4 | A |
|--------------------|-------------|-----------|--------|-----|----------|---|-------|----------|---------|---------------------------|----------|---------|---------|---------|---|
| G.DPDFGMVDHGTK.C Y | 60.18       | 1317.5659 | 12     | 1.0 | 659.7909 | 2 | 34.72 | 4        | F4:9473 | 17112021_RID_2349_DP4.raw | 2.6453E5 |         |         | 1.04E6  |   |
| total 1 peptides   |             |           |        |     |          |   |       |          |         |                           |          |         |         |         |   |

JAS05287.1  
[back to list](#)

[Protein Coverage](#) | [Supporting Peptides](#) |  
Protein Coverage:

|     |             |            |            |            |            |             |             |             |
|-----|-------------|------------|------------|------------|------------|-------------|-------------|-------------|
| 1   | MIEVLLVTIC  | LAVFPYQGSS | IILESGNVND | YEVVYPRKVT | ALPKGAVQPN | YEDAMQYEFK  | VNGESVVLHL  | EKNKELFSEN  |
| 81  | YSETHYSPDG  | REITTYPPAE | DHCYYHGRIE | NDADSTASIS | ACNGLKGHFK | LQGEMYLIIEP | LELPDSEAH   | VFKYENVEKE  |
| 161 | DEAPKMGCVT  | QTNWKSYPEI | KKPSHLVVTA | EQQLRTKRYV | ELVIVADHGM | FMKHNETLRT  | WVFQMVNTIN  | EIYIPLNIRF  |
| 241 | ALVGLEIWSN  | GDKITVQSSA | HNTLHLFGNW | RKRVLKRRKH | HDNAQLLTSI | DFDGRVTVGLA | HVSSMCNQKL  | STGVIQDHSA  |
| 321 | INLVMAVTMA  | HELGHNLGMD | HDIKYCTCGA | PACVMGNTLS | EQPSYGFSNC | SQNQYQTFII  | NYNPQCILNE  | PLPTDIVSPV  |
| 401 | VCGNELLEVGE | EECDGSPNPT | CRDPCCDATT | CKQHSWVECE | SGECCEQCKF | KGAGTECRAA  | RSECEDIAESC | TGQSADCPSTD |
| 481 | DLHRNGQPCL  | NNHGYCYNGM | CPIMDHQCIA | LYGADATVAP | DACFDNFKLG | QDNFYCRREK  | ARIFPCAPQD  | VKCGRLFCF   |
| 561 | GHYSCQYQYS  | G          | DPDFGMVDH  | GTK        | CADGKVC    | KNRQVDVTT   | AY          |             |

Supporting Peptides:

| Peptide            | Uniq -10lgP | Mass      | Length | ppm | m/z      | z | RT    | Fraction | Scan    | Source File               | Area F1  | Area F2 | Area F3 | Area F4 | A |
|--------------------|-------------|-----------|--------|-----|----------|---|-------|----------|---------|---------------------------|----------|---------|---------|---------|---|
| G.DPDFGMVDHGTK.C Y | 60.18       | 1317.5659 | 12     | 1.0 | 659.7909 | 2 | 34.72 | 4        | F4:9473 | 17112021_RID_2349_DP4.raw | 2.6453E5 |         |         | 1.04E6  |   |
| total 1 peptides   |             |           |        |     |          |   |       |          |         |                           |          |         |         |         |   |

ABG26980.1  
[back to list](#)

[Protein Coverage](#) | [Supporting Peptides](#) |  
Protein Coverage:

|     |            |            |            |            |            |            |            |            |
|-----|------------|------------|------------|------------|------------|------------|------------|------------|
| 1   | MIEVLLVTIC | LAVFPYQGSS | IILESGNVND | YEVVYPRKVT | ALPKGAVQPN | YEDAMQYEFK | VNGESVVLHL | EKNKELFSEN |
| 81  | YSETHYSPDG | REITTYPPAE | DHCYYHGRIE | NDADSTASIS | ACNGLKGHFK | LQGEMYLIEP | LELPDSEAHA | VFKYENVEKE |
| 161 | DEAPKMGCVT | QTNWKSYPEI | KKPSHLVVTA | EQQRLTKRYV | ELVIVADHGM | FMKHNETLRT | WVFQMNTIN  | EIYIPLNIRF |
| 241 | ALVGLEIWSN | GDKITVQSSA | HNTLHLFGNW | RKRVLKRRK  | HDNAQLLTSI | DFDGRTVGLA | HVSSMCNQKL | STGVIQDHSA |
| 321 | INLVMAVTMA | HELGHNLGMD | HDIKYCTCGA | PACVMGNTLS | EQPSYGFSNC | SQNQYQTFII | NYNPQCILNE | PLPTDIVSPP |
| 401 | VCGNELLEVG | EECDCGSPNT | CRDPCCDATT | CKQHSWVECE | SCECCEQCKF | KGAGTECRAA | RSECDIAESC | TGQSADCPTD |
| 481 | DLHRNGQPCL | NNHGYCYNGM | CPIMDHQCIA | LYGADATVAP | DACFDNFLKG | QDNFYCRREK | ARIFPCAPQD | VKCGRLFCEF |
| 561 | GHYSCQYQYS | GDPDFGMVDH | GTK        | CADGKVC    | KNRQCVDVTT | AY         |            |            |

Supporting Peptides:

| Peptide            | Uniq  | -10lgP    | Mass | Length | ppm      | m/z | z     | RT | Fraction | Scan                      | Source File | Area F1  | Area F2 | Area F3 | Area F4 | A |
|--------------------|-------|-----------|------|--------|----------|-----|-------|----|----------|---------------------------|-------------|----------|---------|---------|---------|---|
| G.DPDFGMVDHGTK.C Y | 60.18 | 1317.5659 | 12   | 1.0    | 659.7909 | 2   | 34.72 | 4  | F4:9473  | 17112021_RID_2349_DP4.raw |             | 2.6453E5 |         |         | 1.04E6  |   |
| total 1 peptides   |       |           |      |        |          |     |       |    |          |                           |             |          |         |         |         |   |

JAS05286.1  
[back to list](#)

| [Protein Coverage](#) | [Supporting Peptides](#) |

Protein Coverage:

|     |            |            |            |            |            |            |            |            |
|-----|------------|------------|------------|------------|------------|------------|------------|------------|
| 1   | MIEVLLVTIC | LAVFPYQGSS | IILESGNVND | YEVVYPRKVT | ALPKGAVQPN | YEDAMQYEFK | VNGESVVLHL | EKNKELFSEN |
| 81  | YSETHYSPDG | REITTYPPAE | DHCYYHGRIE | NDADSTASIS | ACNGLKGHFK | LQGEMYLIEP | LELPDSEAHA | VFKYENVEKE |
| 161 | DEAPKMGCVT | QTNWKSYPEI | KKPSHLVVTA | EQQRLTKRYV | ELVIVADHGM | FMKHNETLRT | WVFQMNTIN  | EIYIPLNIRF |
| 241 | ALVGLEIWSN | GDKITVQSSA | HNTLHLFGNW | RKRVLKRRK  | HDNAQLLTSI | DFDGRTVGLA | HVSSMCNQKL | STGVIQDHSA |
| 321 | INLVMAVTMA | HELGHNLGMD | HDIKYCTCGA | PACVMGNTLS | EQPSYGFSNC | SQNQYQTFII | NYNPQCILNE | PLPTDIVSPP |
| 401 | VCGNELLEVG | EECDCGSPNT | CRDPCCDATT | CKQHSWVECE | SCECCEQCKF | KGAGTECRAA | RSECDIAESC | TGQSADCPTD |
| 481 | DLHRNGQPCL | NNHGYCYNGM | CPIMDHQCIA | LYGADATVAP | DACFDNFLKG | QDNFYCRREK | ARIFPCAPQD | VKCGRLFCEF |
| 561 | GHYSCQYQYS | GDPDFGMVDH | GTK        | CADGKVC    | KNRQCVDVTT | AY         |            |            |

Supporting Peptides:

| Peptide            | Uniq  | -10lgP    | Mass | Length | ppm      | m/z | z     | RT | Fraction | Scan                      | Source File | Area F1  | Area F2 | Area F3 | Area F4 | A |
|--------------------|-------|-----------|------|--------|----------|-----|-------|----|----------|---------------------------|-------------|----------|---------|---------|---------|---|
| G.DPDFGMVDHGTK.C Y | 60.18 | 1317.5659 | 12   | 1.0    | 659.7909 | 2   | 34.72 | 4  | F4:9473  | 17112021_RID_2349_DP4.raw |             | 2.6453E5 |         |         | 1.04E6  |   |
| total 1 peptides   |       |           |      |        |          |     |       |    |          |                           |             |          |         |         |         |   |

JAS05288.1  
[back to list](#)

| [Protein Coverage](#) | [Supporting Peptides](#) |

Protein Coverage:

|     |            |            |            |            |            |            |            |            |
|-----|------------|------------|------------|------------|------------|------------|------------|------------|
| 1   | MIEVLLLTIC | LAVFPYQGSS | IILESGNVND | YEVVYPRKVT | ALPKGAVQPN | YEDAMQYEFK | VNGESVVLHL | EKNKELFSEN |
| 81  | YSETHYSPDG | REITTYPPAE | DHCYYHGRIE | NDADSTASIS | ACNGLKGHFK | LQGEMYLIEP | LELPDSEAHA | VFKYENVEKE |
| 161 | DEAPKMGCVT | QTNWKSYPEI | KKPSHLVVTA | EQQRLTKRYV | ELVIVADHGM | FMKHNETLRT | WVFQMNTIN  | EIYIPLNIRF |
| 241 | ALVGLEIWSN | GDKITVQSSA | HNTLHLFGNW | RKRVLKRRK  | HDNAQLLTSI | DFDGRTVGLA | HVSSMCNQKL | STGVIQDHSA |
| 321 | INLVMAVTMA | HELGHNLGMD | HDIKYCTCGA | PACVMGNTLS | EQPSYGFSNC | SQNQYQTFII | NYNPQCILNE | PLPTDIVSPP |
| 401 | VCGNELLEVG | EECDCGSPNT | CRDPCCDATT | CKQHSWVECE | SCECCEQCKF | KGAGTECRAA | RSECDIAESC | TGQSADCPTD |
| 481 | DLHRNGQPCL | NNHGYCYNGM | CPIMDHQCIA | LYGADATVAP | DACFDNFLKG | QDNFYCRREK | ARIFPCAPQD | VKCGRLFCEF |
| 561 | GHYSCQYQYS | GDPDFGMVDH | GTK        | CADGKVC    | KNRQCVDVTT | AY         |            |            |

Supporting Peptides:

| Peptide            | Uniq  | -10lgP    | Mass | Length | ppm      | m/z | z     | RT | Fraction | Scan                      | Source File | Area F1  | Area F2 | Area F3 | Area F4 | A |
|--------------------|-------|-----------|------|--------|----------|-----|-------|----|----------|---------------------------|-------------|----------|---------|---------|---------|---|
| G.DPDFGMVDHGTK.C Y | 60.18 | 1317.5659 | 12   | 1.0    | 659.7909 | 2   | 34.72 | 4  | F4:9473  | 17112021_RID_2349_DP4.raw |             | 2.6453E5 |         |         | 1.04E6  |   |
| total 1 peptides   |       |           |      |        |          |     |       |    |          |                           |             |          |         |         |         |   |

JAS05285.1  
[back to list](#)

| [Protein Coverage](#) | [Supporting Peptides](#) |

Protein Coverage:

|     |            |            |            |            |            |            |            |            |
|-----|------------|------------|------------|------------|------------|------------|------------|------------|
| 1   | MIEVLLLTIC | LAVFPYQGSS | IILESGNVND | YEVVYPRKVT | ALPKGAVQPN | YEDAMQYEFK | VNGESVVLHL | EKNKELFSEN |
| 81  | YSETHYSPDG | REITTYPPAE | DHCYYHGRIE | NDADSTASIS | ACNGLKGHFK | LQGEMYLIEP | LELPDSEAHA | VFKYENVEKE |
| 161 | DEAPKMGCVT | QTNWKSYPEI | KKPSHLVVTA | EQQRLTKRYV | ELVIVADHGM | FMKHNETLRT | WVFQMNTIN  | EIYIPLNIRF |
| 241 | ALVGLEIWSN | GDKITVQSSA | HNTLHLFGNW | RKRVLKRRK  | HDNAQLLTSI | DFDGRTVGLA | HVSSMCNQKL | STGVIQDHSA |
| 321 | INLVMAVTMA | HELGHNLGMD | HDIKYCTCGA | PACVMGNTLS | EQPSYGFSNC | SQNQYQTFII | NYNPQCILNE | PLPTDIVSPP |
| 401 | VCGNELLEVG | EECDCGSPNT | CRDPCCDATT | CKQHSWVECE | SCECCEQCKF | KGAGTECRAA | RSECDIAESC | TGQSADCPTD |
| 481 | DLHRNGQPCL | NNHGYCYNGM | CPIMDHQCIA | LYGADATVAP | DACFDNFLKG | QDNFYCRREK | ARIFPCAPQD | VKCGRLFCEF |
| 561 | GHYSCQYQYS | GDPDFGMVDH | GTK        | CADGKVC    | KNRQCVDVTT | AY         |            |            |

Supporting Peptides:

| Peptide            | Uniq -10lgP | Mass      | Length | ppm | m/z      | z | RT    | Fraction | Scan    | Source File               | Area F1  | Area F2 | Area F3 | Area F4 | A |
|--------------------|-------------|-----------|--------|-----|----------|---|-------|----------|---------|---------------------------|----------|---------|---------|---------|---|
| G.DPDFGMVDHGTK.C Y | 60.18       | 1317.5659 | 12     | 1.0 | 659.7909 | 2 | 34.72 | 4        | F4:9473 | 17112021_RID_2349_DP4.raw | 2.6453E5 |         |         | 1.04E6  |   |
| total 1 peptides   |             |           |        |     |          |   |       |          |         |                           |          |         |         |         |   |

JAS05407.1

[back to list](#)

| [Protein Coverage](#) | [Supporting Peptides](#) |

Protein Coverage:

|     |            |                      |            |            |            |             |             |             |
|-----|------------|----------------------|------------|------------|------------|-------------|-------------|-------------|
| 1   | MIQVLLVTIC | LAVFPYQGSS           | IILESGNVND | YEVVYPRKVT | ALPKGAVQPK | YEDAMQYEFK  | VNGEPVVLHL  | EKNKELFSEN  |
| 81  | YSETHYSPDG | REITTYPPAE           | DHCYYHGRIE | NDADSTASIS | ACNGLKGHFK | LQGKIYLIIEP | LKLSNSEAHA  | VYKYENVEKE  |
| 161 | DEAPKMCQVT | QNWKSYEPIK           | KASQLVVTAE | QQRIAKRYVE | FVIVVDHGMV | TKHNETLRTW  | VFQIVNTINE  | IYIPLNIRFA  |
| 241 | LVGLEIWSNG | DKINVQSSAH           | NTLHLFGNWR | RRVLLKRKRH | DNAQLLTSID | FDGQTVGLAH  | VSSMCNQKLS  | TGVIQDHSIAI |
| 321 | NLLVAVTMAH | ELGHNLMGMDH          | DGNQCHCDAP | SCVMSARLRE | RPSYGFSNCS | QNEYQMFIIN  | YNPQCILNEP  | LPTDIVSPPV  |
| 401 | CGNELLEVGE | ECDCGSPNNC           | QDPCCDATTC | KQHSWVECES | GECCEQCRFK | GAGTECRAAS  | SECIDIAESCT | GQSADCPSTD  |
| 481 | LHRNGQPCLN | NHGYCYNGMC           | PIMDHQCIAL | YGADATVAED | ACFDSNLQGG | GNFYCRRENG  | RIFPCAPQDV  | KCGRFLCKFD  |
| 561 | HYSCQYQYSG | <b>DPDFGMVDHG TK</b> | CADGKVCN   | NRRCVDVTTA | Y          |             |             |             |

Supporting Peptides:

| Peptide            | Uniq -10lgP | Mass      | Length | ppm | m/z      | z | RT    | Fraction | Scan    | Source File               | Area F1  | Area F2 | Area F3 | Area F4 | A |
|--------------------|-------------|-----------|--------|-----|----------|---|-------|----------|---------|---------------------------|----------|---------|---------|---------|---|
| G.DPDFGMVDHGTK.C Y | 60.18       | 1317.5659 | 12     | 1.0 | 659.7909 | 2 | 34.72 | 4        | F4:9473 | 17112021_RID_2349_DP4.raw | 2.6453E5 |         |         | 1.04E6  |   |
| total 1 peptides   |             |           |        |     |          |   |       |          |         |                           |          |         |         |         |   |

JAS05408.1

[back to list](#)

| [Protein Coverage](#) | [Supporting Peptides](#) |

Protein Coverage:

|     |            |                      |            |            |            |             |             |             |
|-----|------------|----------------------|------------|------------|------------|-------------|-------------|-------------|
| 1   | MIEVLLVTIF | LAVFPYQGSS           | IILESGNVND | YEVVYPRKVT | ALPKGAVQPK | YEDAMQYEFK  | VNGEPVVLHL  | EKNKELFSEN  |
| 81  | YSETHYSPDG | REITTYPPAE           | DHCYYHGRIE | NDADSTASIS | ACNGLKGHFK | LQGKIYLIIEP | LKLSNSEAHA  | VYKYENVEKE  |
| 161 | DEAPKMCQVT | QNWKSYEPIK           | KPSQLVVTAE | QQRIAKRYVE | FVIVVDHGMV | TKHNETLRTW  | VFQIVNTINE  | IYIPLNIRFA  |
| 241 | LVGLEIWSNG | DKINVQSSAH           | NTLHLFGNWR | RRVLLKRKRH | DNAQLLTSID | FDGQTVGLAH  | VSSMCNQKLS  | TGVIQDHSIAI |
| 321 | NLLVAVTMAH | ELGHNLMGMDH          | DGNQCHCDAP | SCVMSARLRE | RPSYGFSNCS | QNEYQMFIIN  | YNPQCILNEP  | LPTDIVSPPV  |
| 401 | CGNELLEVGE | ECDCGSPNNC           | QDPCCDATTC | KQHSWVECES | GECCEQCRFK | GAGTECRAAS  | SECIDIAESCT | GQSADCPSTD  |
| 481 | LHRNGQPCLN | NHGYCYNGMC           | PIMDHQCIAL | YGADATVAED | ACFDSNLQGG | GNFYCRRENG  | RIFPCAPQDV  | KCGRFLCKFD  |
| 561 | HYSCQYQYSG | <b>DPDFGMVDHG TK</b> | CADGKVCN   | NRRCVDVTTA | Y          |             |             |             |

Supporting Peptides:

| Peptide            | Uniq -10lgP | Mass      | Length | ppm | m/z      | z | RT    | Fraction | Scan    | Source File               | Area F1  | Area F2 | Area F3 | Area F4 | Area F5 |
|--------------------|-------------|-----------|--------|-----|----------|---|-------|----------|---------|---------------------------|----------|---------|---------|---------|---------|
| G.DPDFGMVDHGTK.C Y | 60.18       | 1317.5659 | 12     | 1.0 | 659.7909 | 2 | 34.72 | 4        | F4:9473 | 17112021_RID_2349_DP4.raw | 2.6453E5 |         |         | 1.04E6  |         |
| total 1 peptides   |             |           |        |     |          |   |       |          |         |                           |          |         |         |         |         |

QIV64953.1

[back to list](#)

| [Protein Coverage](#) | [Supporting Peptides](#) |

Protein Coverage:

|     |            |            |            |            |                          |            |            |            |
|-----|------------|------------|------------|------------|--------------------------|------------|------------|------------|
| 1   | TIDFDGQTVG | LAHISSMCNS | KLSTGVIQDH | SPINLLMAVT | MAHELGHNLG               | MDHDTKYCTC | GAPACIISDT | LSHQPSKQFS |
| 81  | NCSKEDYRTY | LINRRPQCIL | NEPLPTDIIS | PPVCGNELLE | VGEECDGCGSP              | NTCQDPCCDA | TTCKQHSWVE | CESGECCEQC |
| 161 | KFKGAGTECQ | AAKDDCDMAE | SCTGRSAYCP | TDDLHRNGQP | CLNNHGYCYN               | GMCPIMDHQC | IALYGADATV | AEDACFDLNL |
| 241 | QGQGNFYCRR | EKARIVPCAP | QDVKCGRLFC | KFDHYSCYQY | YSG <b>DPDFGMV DHGTK</b> | CADGKVCN   | VCKNRQCVDV | TTAY       |

Supporting Peptides:

| Peptide            | Uniq -10lgP | Mass      | Length | ppm | m/z      | z | RT    | Fraction | Scan    | Source File               | Area F1  | Area F2 | Area F3 | Area F4 | A |
|--------------------|-------------|-----------|--------|-----|----------|---|-------|----------|---------|---------------------------|----------|---------|---------|---------|---|
| G.DPDFGMVDHGTK.C Y | 60.18       | 1317.5659 | 12     | 1.0 | 659.7909 | 2 | 34.72 | 4        | F4:9473 | 17112021_RID_2349_DP4.raw | 2.6453E5 |         |         | 1.04E6  |   |
| total 1 peptides   |             |           |        |     |          |   |       |          |         |                           |          |         |         |         |   |

ETE57622.1

[back to list](#)

| [Protein Coverage](#) | [Supporting Peptides](#) |

Protein Coverage:

|     |                   |       |        |       |        |       |        |       |        |        |        |        |        |       |       |              |
|-----|-------------------|-------|--------|-------|--------|-------|--------|-------|--------|--------|--------|--------|--------|-------|-------|--------------|
| 1   | MSHVS             | MWRTS | SSTLLE | KLSS  | LHNIKS | SNVVH | PNDGSG | GIFGG | SHGIT  | TGLHYI | FFSLPL | CKGI   | TSQPT  | LTQPV | SQSGS | PGGTV        |
| 81  | KLSCAI            | SSNP  | NNVRW  | VQKS  | GEAPR  | FVHCD | ACSSR  | GDGIP | DRFMAT | RSGN   | NGYLT  | TITNLQ | AEDEAD | YFCC  | MWYSS | GNMFH        |
| 161 | IISHSG            | PLRG  | TIKLS  | CAISS | DEMAIS | WLQQ  | RSGGAP | HVH   | CDGCN  | RGPPI  | PGRFT  | GTRSG  | NNGYLT | TITTL | QAEDK | ANYYC        |
| 241 | YMWYSS            | GGRF  | HRSFA  | QYVLT | QPASV  | SVPLR | QNARIT | CSAN  | NIASKN | VHWY   | QQKPG  | DPPVL  | IYNDN  | QRPT  | GISDQ | <b>FSGTN</b> |
| 321 | <b>SGNTATLSIS</b> | RAQAQ | DEAVY  | YCQVF | DSNQ   | TKAQF | SIMAW  | SLLLA | FFFLG  | CTRATA | QFTL   | TQPAA  | QSFPL  | GQPAK | ISCTM |              |
| 401 | SRDSQ             | VGSYD | ISWHQ  | QKAGE | SPKYLL | SNMG  | SNGRFK | GSKD  | ASANA  | AYLTI  | TNLQA  | EEED   | YCGG   | AYGSG | NNW   | FPQ          |

Supporting Peptides:

| Peptide                | Uniq  | -10lgP    | Mass | Length | ppm      | m/z | z     | RT | Fraction | Scan     | Source File               | Area F1 | Area F2 | Area F3 | Area F4 | Area F5 |
|------------------------|-------|-----------|------|--------|----------|-----|-------|----|----------|----------|---------------------------|---------|---------|---------|---------|---------|
| Q.FSGTNSGNTATLSISR.A Y | 55.32 | 1611.7853 | 16   | 0.3    | 806.9001 | 2   | 36.24 | 7  |          | F7:10113 | 17112021_RID_2349_DP7.raw |         |         |         |         |         |

total 1 peptides

XP\_015672332.1

[back to list](#)

| [Protein Coverage](#) | [Supporting Peptides](#) |

Protein Coverage:

|     |       |       |        |       |                    |             |        |       |       |        |       |       |       |       |        |       |
|-----|-------|-------|--------|-------|--------------------|-------------|--------|-------|-------|--------|-------|-------|-------|-------|--------|-------|
| 1   | MPKPV | NVRVT | TMDAE  | LEFAI | QPNTT              | GKQLF       | DQVVK  | TIGLR | EVWYF | GLQCT  | DNKGF | PWLK  | LEKKV | SAQEI | RKENP  | LQFKF |
| 81  | RAKFF | PEDVF | EELIQ  | DITQK | LFFLQ              | VKEGI       | LSDEI  | YCPPE | TAVLL | GSIYAV | QAKFG | DYNKE | LHKAG | YLSSE | RLVPQ  | RVMNQ |
| 161 | HKLSR | EQWEE | RIQVW  | HAEHG | GMLKEN             | AMLE        | YLKIA  | QDLEM | YGINY | FEIKN  | KKGTD | LWLG  | DALGL | NIYEK | EDKLT  | PKIGF |
| 241 | PWSEI | RNISF | NDKKF  | VIKPI | DKK <b>SPDFIFY</b> | <b>APRL</b> | RINKRI | LQLCM | GNHEL | YMRRR  | KPDTI | EVQQM | KAQAR | EEKNQ | KELER  |       |
| 321 | KMLEK | EKKKR | ETIEK  | EKEQM | MREKE              | EELMIR      | LQEYV  | EKTQK | AEKEL | SDQIE  | KARQL | EDERT | RAQEE | AERLE | NERLM  | ALQAK |
| 401 | EELEK | QAVDQ | MKSQE  | QLATE | LAEYT              | TAKISL      | LEEARK | HKET  | EVEEW | QHRAK  | EAQDD | LVKTK | EELHL | VMTAP | PPPPPP | PAYEP |
| 481 | VNYHV | HDPLQ | DEGIES | SGYS  | AEFSSE             | GILN        | DRNEE  | KRITE | TEKNE | RVQRQ  | LKTLT | DELAQ | ARDEK | KKTQN | DLIHT  | ENMRQ |
| 561 | GRDKY | KTLRQ | IRQGNT | KQRI  | DEFES              | M           |        |       |       |        |       |       |       |       |        |       |

Supporting Peptides:

| Peptide          | Uniq  | -10lgP    | Mass | Length | ppm      | m/z | z     | RT | Fraction | Scan     | Source File               | Area F1 | Area F2 | Area F3 | Area F4 | Area F5 | Area F6 |
|------------------|-------|-----------|------|--------|----------|-----|-------|----|----------|----------|---------------------------|---------|---------|---------|---------|---------|---------|
| K.SPDFIFYAPR.L Y | 52.38 | 1211.5974 | 10   | 0.5    | 606.8063 | 2   | 55.07 | 1  |          | F1:16773 | 12112021_RID_2349_DP1.raw | 7.951E4 |         |         |         |         |         |

total 1 peptides

TRINITY\_DN27458

[back to list](#)

| [Protein Coverage](#) | [Supporting Peptides](#) |

Protein Coverage:

|     |       |        |        |       |        |                         |       |        |       |       |       |       |       |        |       |        |
|-----|-------|--------|--------|-------|--------|-------------------------|-------|--------|-------|-------|-------|-------|-------|--------|-------|--------|
| 1   | MTQGS | VLLFI  | LYMSH  | HVFAQ | GQNSY  | LIQEC                   | LNNNY | TEKSC  | EKVFC | QPWQT | CIEGT | CHCKI | PYQC  | PRNGTS | VCSTM | RRSFQ  |
| 81  | TYCQL | KSYEC  | RQRLS  | KFLSR | GVCNRE | AHFN                    | VLFSE | HENASS | EGIIQ | VELSN | SEKSF | LCGKG | LTIEH | ANVIC  | RHLGF | AEAGAD |
| 161 | GKESV | EPDED  | QNSHE  | CLKAT | CRGTET | SRLAE                   | CGLKK | LRLTT  | CKLAK | VICHT | EQRDC | SPREF | RCVNG | KCISS  | AKTCD | GLNDC  |
| 241 | GDLS  | DELCK  | ACKRK  | HFHNC | SDVCIP | SSFV                    | CNNEL | DCLTG  | EDELN | CNKTG | GSKKV | ETEGR | RTSNK | EEASNQ | VIQSM | DEERK  |
| 321 | RTKSL | FPPVLS | CGITN  | HTVTR | RKRIIG | GFTA                    | KPHEF | PWQVA  | IRGEG | QIMNC | GGVYI | GGCWI | LTAAH | CVRRS  | RLHIY | KIWTG  |
| 401 | IVDSM | KYSTR  | VDTFSL | KDMI  | IHEHYN | AK <b>TY QNDIALLEMK</b> | TKNEG | TPCSP  | RHTVP | PVCI  | PW    | SQYMF | GSGHQ | CKVSG  | WGLDE |        |
| 481 | ESTRQ | YILKW  | GYVTL  | MDNCS | EIYKN  | RYFKG                   | MECAG | TDDGS  | VDACK | GDSGG | PLVCF | DHNNV | GYVWG | VVSWG  | ENCGE | KGHPG  |
| 561 | VYTKV | ALYFD  | WIAQHT | GISL  | ISKYN  | L                       |       |        |       |       |       |       |       |        |       |        |

Supporting Peptides:

| Peptide            | Uniq  | -10lgP    | Mass | Length | ppm      | m/z | z     | RT | Fraction | Scan     | Source File               | Area F1 | Area F2 | Area F3 | Area F4  | Area F5 | Area F6 |
|--------------------|-------|-----------|------|--------|----------|-----|-------|----|----------|----------|---------------------------|---------|---------|---------|----------|---------|---------|
| K.TYQNDIALLEMK.T Y | 51.48 | 1437.7173 | 12   | 1.1    | 719.8667 | 2   | 52.54 | 4  |          | F4:15401 | 17112021_RID_2349_DP4.raw |         |         |         | 1.3912E5 |         |         |

total 1 peptides

XP\_015683432.1

[back to list](#)

| [Protein Coverage](#) | [Supporting Peptides](#) |

Protein Coverage:

|     |        |        |        |                        |        |        |       |       |       |         |        |        |        |        |       |        |
|-----|--------|--------|--------|------------------------|--------|--------|-------|-------|-------|---------|--------|--------|--------|--------|-------|--------|
| 1   | MTQGS  | VLLFI  | LYLSH  | HVFAQ                  | GQNSY  | LIEEC  | LENNY | TEQSC | EKVFC | QPWQT   | CIEGT  | CHCKI  | PYQC   | PRNGTL | VCSTT | RRSFQ  |
| 81  | TYCQL  | KSYEC  | RQRSS  | KFLSR                  | GLCNRE | ARFN   | VLFSE | HNASS | EGIIQ | VELSN   | SEKSF  | LCEKG  | LTIEH  | ANVIC  | KHLGF | AEAGAD |
| 161 | GKESV  | EPDED  | QNSHE  | CLKAT                  | CRGTET | SRLAE  | CGLKK | MRLTI | GKLAK | VICHT   | EQRDC  | SPREF  | RCVNG  | KCISS  | TKTCD | GLNDC  |
| 241 | GDLS   | DELCK  | ACKRK  | TFHCN                  | SDVCIP | SSSV   | CNNEL | DCLTG | EDELN | CNKTG   | RSKKG  | DSNQV  | IESV   | DEERK  | TKTLL | PVISC  |
| 321 | GITNHT | TVTRR  | KRVIG  | GFTAK                  | PHDFP  | WQVAI  | RREGQ | TMNCG | GVYIG | GCWIL   | TAAHC  | VRRSR  | LHVY   | KIWTGV | VDSIK | FNRSV  |
| 401 | ETFSL  | KDMII  | HEHYNS | K <b>TYQ NDIALLEMK</b> | KNEG   | TPCSPP | DTVP  | PVCI  | PWS   | QYMF    | GGGHQC | KVSG   | WGLDEG | STRQY  | ILKWG |        |
| 481 | YVTL   | MDNCSE | IYKNRY | FKGM                   | ECAGT  | DDGSV  | DACKG | DSSGP | LVC   | FDHNNVG | YLW    | GVVSWG | NCGER  | GHPGV  | YTKV  | ANYFDW |
| 561 | IAQRT  | GIALI  | SKYNL  |                        |        |        |       |       |       |         |        |        |        |        |       |        |

Supporting Peptides:

| Peptide                                                                | Uniq        | -10lgP     | Mass       | Length     | ppm        | m/z         | z           | RT          | Fraction   | Scan                      | Source File | Area F1 | Area F2 | Area F3 | Area F4  | Area F5 | Area F6 |
|------------------------------------------------------------------------|-------------|------------|------------|------------|------------|-------------|-------------|-------------|------------|---------------------------|-------------|---------|---------|---------|----------|---------|---------|
| K.TYQNDIALLEMK.T Y                                                     | 51.48       | 1437.7173  | 12         | 1.1        | 719.8667   | 2           | 52.54       | 4           | F4:15401   | 17112021_RID_2349_DP4.raw |             |         |         |         | 1.3912E5 |         |         |
| total 1 peptides                                                       |             |            |            |            |            |             |             |             |            |                           |             |         |         |         |          |         |         |
| XP_007421015.1                                                         |             |            |            |            |            |             |             |             |            |                           |             |         |         |         |          |         |         |
| <a href="#">back to list</a>                                           |             |            |            |            |            |             |             |             |            |                           |             |         |         |         |          |         |         |
| <a href="#">Protein Coverage</a>   <a href="#">Supporting Peptides</a> |             |            |            |            |            |             |             |             |            |                           |             |         |         |         |          |         |         |
| Protein Coverage:                                                      |             |            |            |            |            |             |             |             |            |                           |             |         |         |         |          |         |         |
| 1                                                                      | MGFPVALVFF  | LGGAVLRGAA | VRCGYQSCP  | V          | TEP        | DMLNIHL     | IPHTHDDVGW  | LKTVDQYFFG  | VRNDIQHAGV | QYILDSVIPQ                |             |         |         |         |          |         |         |
| 81                                                                     | LLADPSKRFI  | YVEVAFFARW | WGLQTEAMRQ | AVRQLVAEGR | LEFVNGGWC  | MNDEASVHYN  | AVIDQMSLGLH | FLKETFGECG  |            |                           |             |         |         |         |          |         |         |
| 161                                                                    | RPRVAWHIDP  | FGHSREQASL | FAQMGYDGF  | LGRIDYQDKS | HRESLREMEQ | LWRASRNLD   | PVADLFTGIL  | PNVYNPPVSL  |            |                           |             |         |         |         |          |         |         |
| 241                                                                    | CWDQICSDNP  | IVDDSDENN  | VENIVAYFLG | TATAQAKHYR | TNHIVMTMGS | DFQYENALLW  | YKNMDKLIHH  | VNAQQLRGSR  |            |                           |             |         |         |         |          |         |         |
| 321                                                                    | INVFYSTPSC  | YLWELNKANM | SWSVKYDDFF | PYADGPHQFW | TGYFTSRPAL | KRYERLSNNF  | LQICNQLEVL  | VGPKANLGPY  |            |                           |             |         |         |         |          |         |         |
| 401                                                                    | GSANSSVLRQ  | AMGVAQHDDA | VSGTAKQHVT | NDYAKQLSVG | WDACQIVMSN | ALASLVGSKE  | NFIYCTYLN   | SVCPLTEAAP  |            |                           |             |         |         |         |          |         |         |
| 481                                                                    | TFTVVIYNPL  | ARSVDWNVRL | PVNGSHYSV  | APDQGNVLNE | IIPVSSFTRA | VRHNQGSAIN  | ELVFQASLPP  | LGYSTYSISR  |            |                           |             |         |         |         |          |         |         |
| 561                                                                    | LSARDPVRSR  | LLKRLRPQPA | AEYLMIAIEN | EHLQVLDFPR | TGLMKEIRNL | DKNISLPLLQ  | SFLWYNASVG  | NEEHSQPSGA  |            |                           |             |         |         |         |          |         |         |
| 641                                                                    | YIFRPDTSKP  | FPIAQEARIV | QMKTQVVQEL | YQNFSDWCSQ | VVRLYAGQPY | VELEWTVGPI  | PIWDHRGKEI  | ISRFETNLQT  |            |                           |             |         |         |         |          |         |         |
| 721                                                                    | EGLFYTDSNG  | REILERRRDY | RVTWNLSQTE | PVAGNYYPVN | SRIYIKDRKT | QLTVLTDRSQ  | GGSSLTGDSL  | ELMVHRRLLH  |            |                           |             |         |         |         |          |         |         |
| 801                                                                    | DDNRGVGEPL  | LEPGDYHNG  | VVRGRHLVFL | DTVESSAEQH | RLRAQQEYMA | PQLVLAPGGG  | PPYQPGQGIV  | KEFSALHHA   |            |                           |             |         |         |         |          |         |         |
| 881                                                                    | PSNIHLLTLA  | QWEPDAVLIR | LEHQFEHGEA | VNGSLPVVIN | LLNLFSSFNI | VTVQEMNLSA  | NQKREDVSRL  | LWQPAEGVAA  |            |                           |             |         |         |         |          |         |         |
| 961                                                                    | EQRSGTGLDP  | AHIELFPMEI | RTFLLQIRYQ | DKPRQEM    |            |             |             |             |            |                           |             |         |         |         |          |         |         |
| Supporting Peptides:                                                   |             |            |            |            |            |             |             |             |            |                           |             |         |         |         |          |         |         |
| Peptide                                                                | Uniq        | -10lgP     | Mass       | Length     | ppm        | m/z         | z           | RT          | Fraction   | Scan                      | Source File | Area F1 | Area F2 | Area F3 | Area F4  | Area F5 | Area F6 |
| T.VIYNPLAR.S Y                                                         | 50.81       | 1057.6284  | 9          | 0.8        | 529.8219   | 2           | 50.08       | 1           | F1:15258   | 12112021_RID_2349_DP1.raw | 1.4791E5    |         |         |         |          |         |         |
| total 1 peptides                                                       |             |            |            |            |            |             |             |             |            |                           |             |         |         |         |          |         |         |
| TRINITY_DN13676                                                        |             |            |            |            |            |             |             |             |            |                           |             |         |         |         |          |         |         |
| <a href="#">back to list</a>                                           |             |            |            |            |            |             |             |             |            |                           |             |         |         |         |          |         |         |
| <a href="#">Protein Coverage</a>   <a href="#">Supporting Peptides</a> |             |            |            |            |            |             |             |             |            |                           |             |         |         |         |          |         |         |
| Protein Coverage:                                                      |             |            |            |            |            |             |             |             |            |                           |             |         |         |         |          |         |         |
| 1                                                                      | MAVAQHDDAV  | SGTAKQHVTN | DYAKQLSIGW | DACQIVMNNA | FANLLGSTEN | FIYCTYLNIS  | ACPLTEATPT  | FRVVIYNPLA  |            |                           |             |         |         |         |          |         |         |
| 81                                                                     | RSVDWNVRLP  | VNGSHYSVVA | PDQGNILNEI | IPVSSFTRAV | RHNRGSAINE | LVFQASLPLP  | GYKTVSVSRL  | SLRDPAPHPKL |            |                           |             |         |         |         |          |         |         |
| 161                                                                    | LKRMRPQPA   | AHLTPSIENE | HLQVLDFPST | GLMKEIRNLD | KSISLPLLQS | FLWYNASDGN  | GEYSQASGAY  | IFHPDPSKAF  |            |                           |             |         |         |         |          |         |         |
| 241                                                                    | PIAHGAHVYQ  | IKTQVVQELY | QNFSDWCSQV | VRLYAGQPYV | ELEWTVGPI  | IGDQQKEII   | SRFETNLQTE  | GLFYTDSNGR  |            |                           |             |         |         |         |          |         |         |
| 321                                                                    | EILERRRDYR  | FTWNLSQTEP | VAGNYYPVNS | RIYIKDRKTQ | LTVLTDERSQ | GSSLTGDSLE  | LMVHRRLLHD  | DNRGVQEPLL  |            |                           |             |         |         |         |          |         |         |
| 401                                                                    | EPGEYHNGLV  | VRGRHLIFLD | TVESSAEQHR | LWAQQEYMAP | QVVLTPDSDH | VVKEFSALRY  | ALPLNVHLLT  | LAQWEPDAVL  |            |                           |             |         |         |         |          |         |         |
| 481                                                                    | IRLEHQFEYG  | EAVNGSLPVV | INLLDLFSSF | NIIAVQETNL | SANQKRENV  | SLIWQSTEGI  | AAERRSGTGL  | DPAHIELFPM  |            |                           |             |         |         |         |          |         |         |
| 561                                                                    | QIRTFLLQIR  | S          |            |            |            |             |             |             |            |                           |             |         |         |         |          |         |         |
| Supporting Peptides:                                                   |             |            |            |            |            |             |             |             |            |                           |             |         |         |         |          |         |         |
| Peptide                                                                | Uniq        | -10lgP     | Mass       | Length     | ppm        | m/z         | z           | RT          | Fraction   | Scan                      | Source File | Area F1 | Area F2 | Area F3 | Area F4  | Area F5 | Area F6 |
| R.VIYNPLAR.S Y                                                         | 50.81       | 1057.6284  | 9          | 0.8        | 529.8219   | 2           | 50.08       | 1           | F1:15258   | 12112021_RID_2349_DP1.raw | 1.4791E5    |         |         |         |          |         |         |
| total 1 peptides                                                       |             |            |            |            |            |             |             |             |            |                           |             |         |         |         |          |         |         |
| TRINITY_DN13676                                                        |             |            |            |            |            |             |             |             |            |                           |             |         |         |         |          |         |         |
| <a href="#">back to list</a>                                           |             |            |            |            |            |             |             |             |            |                           |             |         |         |         |          |         |         |
| <a href="#">Protein Coverage</a>   <a href="#">Supporting Peptides</a> |             |            |            |            |            |             |             |             |            |                           |             |         |         |         |          |         |         |
| Protein Coverage:                                                      |             |            |            |            |            |             |             |             |            |                           |             |         |         |         |          |         |         |
| 1                                                                      | MRFPVALVFF  | LGGAVLRGSA | VRCGYQSCP  | TKPDMLNVHL | IPHTHDDVGW | LKTVDQYFFG  | VRNDIQHAGV  | QYILDSVIPQ  |            |                           |             |         |         |         |          |         |         |
| 81                                                                     | LLADPSKRFI  | YVEVAFFARW | WGLQTEAMRQ | AVQQLVAEGR | LEFVNGGWC  | MNDEASVHYN  | AVIDQMSLGLH | FLKETFGECG  |            |                           |             |         |         |         |          |         |         |
| 161                                                                    | RPRVAWHIDP  | FGHSREQASL | FAQMGYDGF  | LGRIDYQDKF | HRESLREMEQ | LWRASRNLD   | PAADLFTGIL  | PNGYDPPMAL  |            |                           |             |         |         |         |          |         |         |
| 241                                                                    | CWDQICSDNP  | IVDDSDENN  | VEKIVAYFLG | IAAAQAKHYR | TNHIVMTMGS | DFQYENAMLW  | YKNLDKLIHH  | VNTQQLKGRS  |            |                           |             |         |         |         |          |         |         |
| 321                                                                    | VNVLYSTPSC  | YLWELNKANM | TWSLKYDDFF | PYANGPHQFW | TGYTTSRPA  | LKRYERLSNNF | LQICNQLEVI  | VGTKANFGPY  |            |                           |             |         |         |         |          |         |         |
| 401                                                                    | GNANSSVLRQ  | TMAVAQHDDA | VSGTAKQHVT | NDYAKQLSIG | WDACQIVMNN | AFANLLGSTE  | NFIYCTYLN   | SACPLTEATP  |            |                           |             |         |         |         |          |         |         |
| 481                                                                    | TFRVVIYNPL  | ARSVDWNVRL | PVNGSHYSV  | APDQGNILNE | IIPVSSFTRA | VRHNRGSAIN  | ELVFQASLPP  | LGKTVSVSR   |            |                           |             |         |         |         |          |         |         |
| 561                                                                    | LSLRDPAPHPK | LLKMRPQPA  | AAHLTPSIEN | EHLQVLDFPS | TGLMKEIRNL | DKSISLPLLQ  | SFLWYNASDG  | NGEYSQASGA  |            |                           |             |         |         |         |          |         |         |
| 641                                                                    | YIFHPDPSKA  | FPIAHGAHVY | QIKVGKAQRH | LLQIDLFAQ  |            |             |             |             |            |                           |             |         |         |         |          |         |         |
| Supporting Peptides:                                                   |             |            |            |            |            |             |             |             |            |                           |             |         |         |         |          |         |         |
| Peptide                                                                | Uniq        | -10lgP     | Mass       | Length     | ppm        | m/z         | z           | RT          | Fraction   | Scan                      | Source File | Area F1 | Area F2 | Area F3 | Area F4  | Area F5 | Area F6 |
| total 1 peptides                                                       |             |            |            |            |            |             |             |             |            |                           |             |         |         |         |          |         |         |

| Peptide         | Uniq  | -10lgP    | Mass | Length | ppm      | m/z | z     | RT | Fraction | Scan                               | Source File | Area F1 | Area F2 | Area F3 | Area F4 | Area F5 | Area F6 |
|-----------------|-------|-----------|------|--------|----------|-----|-------|----|----------|------------------------------------|-------------|---------|---------|---------|---------|---------|---------|
| R.VIIYNPLAR.S Y | 50.81 | 1057.6284 | 9    | 0.8    | 529.8219 | 2   | 50.08 | 1  |          | F1:15258 12112021_RID_2349_DP1.raw | 1.4791E5    |         |         |         |         |         |         |

total 1 peptides

TRINITY\_DN13676  
[back to list](#)

[| Protein Coverage](#) | [Supporting Peptides](#) |

Protein Coverage:

|     |                               |            |            |            |            |             |            |            |
|-----|-------------------------------|------------|------------|------------|------------|-------------|------------|------------|
| 1   | MRFPVALVFF                    | LGGAVLRGSA | VRCGYQSCP  | TKPDMLNVHL | IPHTHDDVGW | LKTVDQYFFG  | VRNDIQHAGV | QYILDSVIPQ |
| 81  | LLADPSKRFI                    | YVEVAFFARW | WGLQTEAMRQ | AVQQQVAEGR | LEFVNGGWC  | MNDEASVHYNA | VIDQMSLGLH | FLKETFGECG |
| 161 | RPRVAWHIDP                    | FGHSREQASL | FAQMGYDGFF | LGRIDYQDKF | HRESLREMEQ | LWRASRNLD   | PAADLFTGIL | PNGYDPPMAL |
| 241 | CWDQICSDNP                    | IVDDSDENN  | VEKIVAYFLG | IAAAQAKHYR | TNHIVMTMGS | DFQYENAMLW  | YKNLDKLIHH | VNTQQLKGSR |
| 321 | VNVLYSTPSC                    | YLWELNKANM | TWSLKYDDFF | PYANGPHQFW | TGYYTSRPA  | LKRYERLSNNF | LQICNQLEVI | VGTKANFGPY |
| 401 | GNANSSVLRQ                    | TMAVAQHDA  | VSGTAKQHVT | NDYAKQLSIG | WDACQIVMNN | AFANLLGSTE  | NFIYCTYLN  | IACPLTEATP |
| 481 | TFR <b>VIIYNPL</b> ARSVDWNVRL | PVNGSHYSV  | APDGQNILNE | IIPVSSFTRA | VRHNRGSAIN | ELVFQASLPP  | LGKTYTSVSR |            |
| 561 | LSLRDPAPHP                    | LLKMRPQPA  | AAHLTPSIEN | EHLQVLFDP  | TGLMKEIRNL | DKSISLPLLQ  | SFLWYNASDG | NGEYSQASGA |
| 641 | YIFHPDPSKA                    | FPIAHGAHVY | QIKVGKAQRH | LLQIDLFAQ  |            |             |            |            |

Supporting Peptides:

| Peptide         | Uniq  | -10lgP    | Mass | Length | ppm      | m/z | z     | RT | Fraction | Scan                               | Source File | Area F1 | Area F2 | Area F3 | Area F4 | Area F5 | Area F6 |
|-----------------|-------|-----------|------|--------|----------|-----|-------|----|----------|------------------------------------|-------------|---------|---------|---------|---------|---------|---------|
| R.VIIYNPLAR.S Y | 50.81 | 1057.6284 | 9    | 0.8    | 529.8219 | 2   | 50.08 | 1  |          | F1:15258 12112021_RID_2349_DP1.raw | 1.4791E5    |         |         |         |         |         |         |

total 1 peptides

TRINITY\_DN13676  
[back to list](#)

[| Protein Coverage](#) | [Supporting Peptides](#) |

Protein Coverage:

|     |                               |            |            |            |            |             |            |             |
|-----|-------------------------------|------------|------------|------------|------------|-------------|------------|-------------|
| 1   | MRFPVALVFF                    | LGGAVLRGSA | VRCGYQSCP  | TKPDMLNVHL | IPHTHDDVGW | LKTVDQYFFG  | VRNDIQHAGV | QYILDSVIPQ  |
| 81  | LLADPSKRFI                    | YVEVAFFARW | WGLQTEAMRQ | AVQQQVAEGR | LEFVNGGWC  | MNDEASVHYNA | VIDQMSLGLH | FLKETFGECG  |
| 161 | RPRVAWHIDP                    | FGHSREQASL | FAQMGYDGFF | LGRIDYQDKF | HRESLREMEQ | LWRASRNLD   | PAADLFTGIL | PNGYDPPMAL  |
| 241 | CWDQICSDNP                    | IVDDSDENN  | VEKIVAYFLG | IAAAQAKHYR | TNHIVMTMGS | DFQYENAMLW  | YKNLDKLIHH | VNTQQLKGSR  |
| 321 | VNVLYSTPSC                    | YLWELNKANM | TWSLKYDDFF | PYANGPHQFW | TGYYTSRPA  | LKRYERLSNNF | LQICNQLEVI | VGTKANFGPY  |
| 401 | GNANSSVLRQ                    | TMAVAQHDA  | VSGTAKQHVT | NDYAKQLSIG | WDACQIVMNN | AFANLLGSTE  | NFIYCTYLN  | IACPLTEATP  |
| 481 | TFR <b>VIIYNPL</b> ARSVDWNVRL | PVNGSHYSV  | APDGQNILNE | IIPVSSFTRA | VRHNRGSAIN | ELVFQASLPP  | LGKTYTSVSR |             |
| 561 | LSLRDPAPHP                    | LLKMRPQPA  | AAHLTPSIEN | EHLQVLFDP  | TGLMKEIRNL | DKSISLPLLQ  | SFLWYNASDG | NGEYSQASGA  |
| 641 | YIFHPDPSKA                    | FPIAHGAHVY | QIKTQVVQEL | YQNFSDWCSQ | VVRLYAGQPY | VELEWTVGPI  | PIGDQQGKEI | ISRFBETNLQT |
| 721 | EGLFYTDNSG                    | REILERRRDY | RFTWNLSQTE | PVAGNYYPVN | SRIYIKVTIS | HGSAQTWLFL  | VSRYTACPHK | A           |

Supporting Peptides:

| Peptide         | Uniq  | -10lgP    | Mass | Length | ppm      | m/z | z     | RT | Fraction | Scan                               | Source File | Area F1 | Area F2 | Area F3 | Area F4 | Area F5 | Area F6 |
|-----------------|-------|-----------|------|--------|----------|-----|-------|----|----------|------------------------------------|-------------|---------|---------|---------|---------|---------|---------|
| R.VIIYNPLAR.S Y | 50.81 | 1057.6284 | 9    | 0.8    | 529.8219 | 2   | 50.08 | 1  |          | F1:15258 12112021_RID_2349_DP1.raw | 1.4791E5    |         |         |         |         |         |         |

total 1 peptides

TRINITY\_DN13676  
[back to list](#)

[| Protein Coverage](#) | [Supporting Peptides](#) |

Protein Coverage:

|     |                               |            |            |            |            |             |            |             |
|-----|-------------------------------|------------|------------|------------|------------|-------------|------------|-------------|
| 1   | MRFPVALVFF                    | LGGAVLRGSA | VRCGYQSCP  | TKPDMLNVHL | IPHTHDDVGW | LKTVDQYFFG  | VRNDIQHAGV | QYILDSVIPQ  |
| 81  | LLADPSKRFI                    | YVEVAFFARW | WGLQTEAMRQ | AVQQQVAEGR | LEFVNGGWC  | MNDEASVHYNA | VIDQMSLGLH | FLKETFGECG  |
| 161 | RPRVAWHIDP                    | FGHSREQASL | FAQMGYDGFF | LGRIDYQDKF | HRESLREMEQ | LWRASRNLD   | PAADLFTGIL | PNGYDPPMAL  |
| 241 | CWDQICSDNP                    | IVDDSDENN  | VEKIVAYFLG | IAAAQAKHYR | TNHIVMTMGS | DFQYENAMLW  | YKNLDKLIHH | VNTQQLKGSR  |
| 321 | VNVLYSTPSC                    | YLWELNKANM | TWSLKYDDFF | PYANGPHQFW | TGYYTSRPA  | LKRYERLSNNF | LQICNQLEVI | VGTKANFGPY  |
| 401 | GNANSSVLRQ                    | TMAVAQHDA  | VSGTAKQHVT | NDYAKQLSIG | WDACQIVMNN | AFANLLGSTE  | NFIYCTYLN  | IACPLTEATP  |
| 481 | TFR <b>VIIYNPL</b> ARSVDWNVRL | PVNGSHYSV  | APDGQNILNE | IIPVSSFTRA | VRHNRGSAIN | ELVFQASLPP  | LGKTYTSVSR |             |
| 561 | LSLRDPAPHP                    | LLKMRPQPA  | AAHLTPSIEN | EHLQVLFDP  | TGLMKEIRNL | DKSISLPLLQ  | SFLWYNASDG | NGEYSQASGA  |
| 641 | YIFHPDPSKA                    | FPIAHGAHVY | QIKTQVVQEL | YQNFSDWCSQ | VVRLYAGQPY | VELEWTVGPI  | PIGDQQGKEI | ISRFBETNLQT |
| 721 | EGLFYTDNSG                    | REILERRRDY | RFTWNLSQTE | PVAGNYYPVN | SRIYIKDRKT | QLTVLTDRSQ  | GGSSLTGDSL | ELMVHRRLLH  |
| 801 | DDNRGVQEPL                    | LEPGEYHNGL | VVRGRHLIFL | DTVESSAEQH | RLWAQQEYMA | PQVVLTDPDSH | DVVKEFSALR | YALPLNVHLL  |
| 881 | TLAQWEPDAV                    | LIRLEHQFEY | GEAVNGSLPV | VINLLDLFSS | FNIIAVQETN | LSANQKRENV  | SRLIWQSTEG | IAAERRSGTG  |
| 961 | LDPAHIELFP                    | MQIRTEFLQI | RS         |            |            |             |            |             |

Supporting Peptides:

| Peptide         | Uniq -10lgP | Mass      | Length ppm | m/z | z        | RT | Fraction | Scan | Source File                        | Area F1  | Area F2 | Area F3 | Area F4 | Area F5 | Area F6 |
|-----------------|-------------|-----------|------------|-----|----------|----|----------|------|------------------------------------|----------|---------|---------|---------|---------|---------|
| R.VIIYNPLAR.S Y | 50.81       | 1057.6284 | 9          | 0.8 | 529.8219 | 2  | 50.08    | 1    | F1:15258 12112021_RID_2349_DP1.raw | 1.4791E5 |         |         |         |         |         |

total 1 peptides

JAV50100.1  
[back to list](#)

| [Protein Coverage](#) | [Supporting Peptides](#) |  
Protein Coverage:

|     |            |            |            |            |              |            |                |             |            |            |  |  |  |  |  |
|-----|------------|------------|------------|------------|--------------|------------|----------------|-------------|------------|------------|--|--|--|--|--|
| 1   | MRFPVALVFF | LGGAVLRGSA | VRCGYQSCP  | V          | TKP          | DMLNVHL    | IPHTHDDVGW     | LKTVDQYFFG  | VRNDIQHAGV | QYILDSVIPQ |  |  |  |  |  |
| 81  | LLADPSKRFI | YVEVAFFARW | WGLQTEAIRQ | AV         | QQLVAEGR     | LEFVNGGWC  | MDEASVHYS      | AVIDQMSLGLH | FLKETFGECG |            |  |  |  |  |  |
| 161 | RPRVAWHIDP | FGHSREQASL | FAQMGYDGFF | LGR        | IDYQDKF      | HRESLREMEQ | LWRASRNLD      | PAADLFTGIL  | PNVYNPPMSL |            |  |  |  |  |  |
| 241 | CWDQICSDNP | IVDDSDENN  | VENIVAYFLG | IAAF       | QAKHYR       | TNHIVMTMGS | DFQYENALLW     | YKNLDKLIHH  | VNAQQLKGSR |            |  |  |  |  |  |
| 321 | VNVLYSTPSC | YLWELNKANM | TWSLKYDDFF | PYAD       | GPHQFW       | TGYTSTRPAL | KRYERLSNNF     | LQICNQLEVI  | VGTKANFGPY |            |  |  |  |  |  |
| 401 | GNANSSVLRQ | AMAVAQHHA  | VSGTAKQHVT | NDYAKQLSIG | WDACQIVMNN   | AFANLLGSTE | NFVYCTYLN      | I           | SACLLTEADP |            |  |  |  |  |  |
| 481 | TFR        | VIIYNPL    | AR         | PVDWNVRL   | PVNGSHYSV    | APDGQNILNE | IIPVSSFTRA     | VRHNRGSAIN  | ELVFQASLPP | LGKTYSVSR  |  |  |  |  |  |
| 561 | LSLRDPAHPR | LLNMRMPQPA | AAHLTPSIKN | EHLQVLFDP  | SGTGLMKEIRNL | DKSISLPLLQ | SFLWKASDG      | NAEHSQASGA  |            |            |  |  |  |  |  |
| 641 | YIFRPDTFKA | FPIAYGADV  | QIKNRVVQEL | YQNFSDWCSQ | VVRLYAGQPY   | VELEWTVGPI | PIGDQOGKEI     | ISRFETNLQT  |            |            |  |  |  |  |  |
| 721 | EGLFYTDSNG | REILERRRDY | RFTWNLSQTE | PVAGNYYPVN | SRIYIKDRKT   | QLTVLTD    | RSQGGSSSLTDGSL | ELMVHRRLLH  |            |            |  |  |  |  |  |
| 801 | DDNRGVQEPL | LEPGEYHNG  | L          | VVRGRHLIFL | DTVESSAEQH   | RLWAQQEYMA | PQVVLTPDSH     | DIVKEFSALR  | HALPLNVHLL |            |  |  |  |  |  |
| 881 | TLAQWEPDAV | LIRLEHQFEY | GEAVNGSLPV | VINLLNLFSS | FNITVQEMN    | LSANQKRENV | SRLIWQSTEG     | IAAKRRSGTG  |            |            |  |  |  |  |  |
| 961 | LDPAHIELFP | MQIRTFVLQI | RY         |            |              |            |                |             |            |            |  |  |  |  |  |

Supporting Peptides:

| Peptide         | Uniq -10lgP | Mass      | Length ppm | m/z | z        | RT | Fraction | Scan | Source File                        | Area F1  | Area F2 | Area F3 | Area F4 | Area F5 | Area F6 |
|-----------------|-------------|-----------|------------|-----|----------|----|----------|------|------------------------------------|----------|---------|---------|---------|---------|---------|
| R.VIIYNPLAR.P Y | 50.81       | 1057.6284 | 9          | 0.8 | 529.8219 | 2  | 50.08    | 1    | F1:15258 12112021_RID_2349_DP1.raw | 1.4791E5 |         |         |         |         |         |

total 1 peptides

LAB58574.1  
[back to list](#)

| [Protein Coverage](#) | [Supporting Peptides](#) |  
Protein Coverage:

|    |           |            |            |            |            |           |   |            |     |         |  |  |  |  |  |
|----|-----------|------------|------------|------------|------------|-----------|---|------------|-----|---------|--|--|--|--|--|
| 1  | AMAVAQHHA | VSGTAKQHVT | NDYAKQLSIG | WDACQIVMNN | AFANLLGSTE | NFIYCTYLN | I | SACSLTEVAP | AFR | VIIYNPL |  |  |  |  |  |
| 81 | AR        | SVDWNIRL   | PVNGSHYSV  | APDG       |            |           |   |            |     |         |  |  |  |  |  |

Supporting Peptides:

| Peptide         | Uniq -10lgP | Mass      | Length ppm | m/z | z        | RT | Fraction | Scan | Source File                        | Area F1  | Area F2 | Area F3 | Area F4 | Area F5 | Area F6 |
|-----------------|-------------|-----------|------------|-----|----------|----|----------|------|------------------------------------|----------|---------|---------|---------|---------|---------|
| R.VIIYNPLAR.S Y | 50.81       | 1057.6284 | 9          | 0.8 | 529.8219 | 2  | 50.08    | 1    | F1:15258 12112021_RID_2349_DP1.raw | 1.4791E5 |         |         |         |         |         |

total 1 peptides

XP\_007421016.1  
[back to list](#)

| [Protein Coverage](#) | [Supporting Peptides](#) |  
Protein Coverage:

|     |            |            |                |            |                |                 |               |                 |            |            |  |  |  |  |  |
|-----|------------|------------|----------------|------------|----------------|-----------------|---------------|-----------------|------------|------------|--|--|--|--|--|
| 1   | MLNIHLIPHT | HDDVGWLKTV | DQYFFGVRND     | IQHAGVQYIL | DSVIPQLLAD     | PSKRFIYVEV      | AFFARWWGLQ    | TEAMRQAVRQ      |            |            |  |  |  |  |  |
| 81  | LVAEGRLEFV | NGGWCNMDEA | SVHYNAVIDQ     | MSLGLHFLKE | TFGECGRPRV     | AWHIDPFGHS      | REQASLFAQM    | GYDGGFFLGRI     |            |            |  |  |  |  |  |
| 161 | DYQDKSHRES | LREMEQLWRA | SRNLDPVPAD     | LFTGILPNVY | NPPVSLCWDQ     | ICSDNP          | IVDDSDENN     | VENI VAYFLGTATA |            |            |  |  |  |  |  |
| 241 | QAKHYRTNHI | VTMGSD     | FQYENALLWYKNM  | DKLIHHVNAQ | QLRGS          | RINVFYSTPSCYLWE | LNKANMSWSV    | KYDDFFPYAD      |            |            |  |  |  |  |  |
| 321 | GPHQFWTGYF | TSRPALKRYE | RLSNNFLQIC     | NQLEVLVGPK | ANLGPYGSAN     | SSVLRQAMGV      | AQHHD         | AVSGTAKQHV      | TNDYA      |            |  |  |  |  |  |
| 401 | KQLSVGWDAC | QIVMSNALAS | LVGSKENFIY     | CTYLNISVCP | LTEAAPTFT      | V               | IIYNPLAR      | SV              | DWNVRLPVNG | SHYSVVAPDG |  |  |  |  |  |
| 481 | QNVLNEIIPV | SSFTRAVRHN | QGSAINELVF     | QASLPPLGYS | TYSISRLSAR     | DPVRSRL         | LKR           | LRPQPAAEYL      | MLAIENEHLQ |            |  |  |  |  |  |
| 561 | VLFDPR     | TGLMKEIRNL | DKNISLPL       | LQSF       | FLWYNASVGNEEH  | SQPSGAYIFR      | PDTSKPFP      | IAQEARIYQMK     | TQVQEL     | YQNF       |  |  |  |  |  |
| 641 | SDWCSQV    | VRLYAGQPY  | VELEWTVGPI     | PIWDHRGKEI | ISRFETNLQTEGLF | YTD             | SNGREILERRRDY | RVTW            | NLSQTEPVAG |            |  |  |  |  |  |
| 721 | NYYPVNSRIY | IKDRKTQLTV | LTDRSQGGSS     | LT         | DGSLELMVHRRL   | LHDDNRGVGEPL    | LEPGDYHNG     | LVVRGRHLVFL     | DTVE       |            |  |  |  |  |  |
| 801 | SSAEQHRLRA | QQEYMAPQLV | LAPGGGPPYQ     | PGQGIVKEFS | ALH            | HALPSNHL        | LLTLAQWEP     | DAVLIRLEHQ      | FEHGEAVNGS |            |  |  |  |  |  |
| 881 | LPVVINLLNL | FSSFNI     | VTVQEMNLSANQKR | EDVSRL     | LWQPAEGVAAEQRS | GTGLDPAHIE      | LFPMEIR       | TFLQIRYQDKPR    |            |            |  |  |  |  |  |
| 961 | QEM        |            |                |            |                |                 |               |                 |            |            |  |  |  |  |  |

Supporting Peptides:

| Peptide         | Uniq -10lgP | Mass      | Length ppm | m/z | z        | RT | Fraction | Scan | Source File                        | Area F1  | Area F2 | Area F3 | Area F4 | Area F5 | Area F6 |
|-----------------|-------------|-----------|------------|-----|----------|----|----------|------|------------------------------------|----------|---------|---------|---------|---------|---------|
| T.VIIYNPLAR.S Y | 50.81       | 1057.6284 | 9          | 0.8 | 529.8219 | 2  | 50.08    | 1    | F1:15258 12112021_RID_2349_DP1.raw | 1.4791E5 |         |         |         |         |         |

total 1 peptides

XP\_026552070.1

[back to list](#)

[Protein Coverage](#) | [Supporting Peptides](#) |

Protein Coverage:

1MRFPVALVFFLGGAVLRGSAVKCGYQSCPVTKPDMLNVHLIPHTHDDVGWLKTVDQYFFGVRNDIQHAGVQYILDSVIPQ

81LLADPNKRFIYVEVVFARWELQTEAMRQAVRQLVAEGRLEFVNGGWCMNDEASVHYNAVIDQMSLGLHFLKETFGEC

161RPRVAWHIDPFGHSREQASLFAQMGYDGFELGRIDYQDKFHRESLREMEQLWRASRNLDPPSADLFTGILPNGYNPPMSL

241CWDQICSDNPVDDNSDENNVESIVAYFLGTAAQAQKHYRTNHIVMTMGSDFYENALLWYKNMDKLIYHVNAQQQLRGS

321VNVLYSTPSCYLWELNKANMTWSMKYDDFFPYADGPHQFWTGYFTSRPALKRYERLSNNFLQICNQLEVLVGTKANFGPY

401GNANSSVLRQAMAVAQHADA VSGTAKQHVTNDYAKQLSIGWDACQIVMNNAFANLLGSTE NFIYCTYLNISVCSLTEFAP

481TFRVVIYNPLARSVVDWNIRLPVNGSHYSVAPDGQNILNEIIPVSSFTRA VRHNQGSATNELVFQASLPP LGYRTYSVSR

561LSGKDSTHPRLLKRLRPRPA AARLTPSIEN EHLQVLFDPN TGLMKEIRNL DKNISLPLSQ SFLWYNASDG NAAFSQASGA

641YIFRPDTSKAFPIAQKVRVYQIKTQVVQEL YQNFSNWCSQ VVRLYAGQPY VELEWTVGPPIADHYGKEIISRFE

721GGLFYTDSNGREILERRRDYRVTWNLSQTEPVAGNYYPVNTRMVYIKDQKTQLTVLTDRSQGGSSLTGSL ELMVHRRLLH

801DDNRGVQEPLLEPGEYHNGLVVRGRHLIFLDTVESSAEQHLWAQQEYMA PQVVLTDPDSH DIVKEFSALR HALPSNVHLL

881TLAQWEPNAV LIRLEHQFEYGEAVNGSLPVAINLLNLFSSFNIITVQEMNLSANQKRENVSRLIWRSTQGIAAERQSGTR

961LDPAHIELSPMQIRTFLLQIRY

Supporting Peptides:

| Peptide        | Uniq  | -10lgP    | Mass | Length | ppm      | m/z | z     | RT | Fraction | Scan     | Source File               | Area F1  | Area F2 | Area F3 | Area F4 | Area F5 | Area F6 |
|----------------|-------|-----------|------|--------|----------|-----|-------|----|----------|----------|---------------------------|----------|---------|---------|---------|---------|---------|
| R.VIYNPLAR.S Y | 50.81 | 1057.6284 | 9    | 0.8    | 529.8219 | 2   | 50.08 | 1  |          | F1:15258 | 12112021_RID_2349_DP1.raw | 1.4791E5 |         |         |         |         |         |

total 1 peptides

JAA96625.1

[back to list](#)

[Protein Coverage](#) | [Supporting Peptides](#) |

Protein Coverage:

1MRFPVALVFFLGGAVLRGSAVRCGYQSCPVTKPDMLNVHLIPHTHDDVGWLKTVDQYFFGVRNDIQHAGVQYILDSVIPQ

81LLADPSKRFIYVEVAFFARWGLQTEAMRQAVQQVLVAEGRLEFVNGGWCMNDEASVHYNAVIDQMSLGLHFLKETFGEC

161RPRVAWHIDPFGHSREQASLFAQMGYDGFELGRIDYQDKFHRESLREMEQLWRASRNLDPPAADLFTGILPNVYNPPMSL

241CWDQICSDNPVDDDDSDENN VENIVAYFLGIAAFQAKHYRTNHIVMTMGSDFYENALLWYKNLDKLIHHVNAQQQLKGS

321VNVLYSTPSCYLWELNKANMTWSLKYDDFFPYADGPHQFWTGYTTSRPALKRYERLSNNFLQICNQLEVI VGRKANFGPY

401GNANSSVLRQAMAVAQHADA VSGTAKQHVTNDYAKQLSIGWDACQIVMSN AFANLLGSTE NFVYCTYLNISACPLTEADP

481TFRVVIYNPLARPVDWNVRLPVNGSHYSVAPDGQNILNEIIPVSSFTRA VRHNRGNAINELVFQASLPP LGYKTYSVSR

561LSLRDPAHPRLLNRMRPQPV AAPLTPSIEN EHLQVLFDPS TGLMKEIRNL DKSISLPLLQ SFLWYNASDG NAEHSQASGA

641YIFRPDTFKA FPIAYGADVQIKNQVVQEL YQNFSDWCSQ VVRLYAGQPY VELEWTVGPPIGDQOGKEISRFE

721EGLFYTDSNGREILERRRDYRFTWNLSQTEPVAGNYYPVNSRIYIKDRKTQLTVLTDRSQGGSSLTGSL ELMVHRRLLR

801DDNRGVQEPLLEPGEYHNGLVVRGRHLIFLDTVESSAEQHLWAQQEYMA PQVVLTDPDSH DIVKEFSALQ HALPLNVHLL

881TLAQWEPDAV LIRLEHQFEYGEAVNGSLPVVNLLNLFSSFNIITVQEMNLSANQKRENVSRLIWQSIEGIAAKRRSGTG

961LDPAHVELFPMQIRTFLLQIRY

Supporting Peptides:

| Peptide        | Uniq  | -10lgP    | Mass | Length | ppm      | m/z | z     | RT | Fraction | Scan     | Source File               | Area F1  | Area F2 | Area F3 | Area F4 | Area F5 | Area F6 |
|----------------|-------|-----------|------|--------|----------|-----|-------|----|----------|----------|---------------------------|----------|---------|---------|---------|---------|---------|
| R.VIYNPLAR.P Y | 50.81 | 1057.6284 | 9    | 0.8    | 529.8219 | 2   | 50.08 | 1  |          | F1:15258 | 12112021_RID_2349_DP1.raw | 1.4791E5 |         |         |         |         |         |

total 1 peptides

XP\_026537394.1

[back to list](#)

[Protein Coverage](#) | [Supporting Peptides](#) |

Protein Coverage:

### Supporting Peptides:

**total 1 peptides**

[back to list](#)

Protein Coverage:

### Supporting Peptides:

**total 1 peptides**

[back to list](#)

Protein Coverage:

### Supporting Peptides:

| Peptide         | Uniq  | -10lgP    | Mass | Length | ppm      | m/z | z     | RT | Fraction | Scan                               | Source File | Area F1 | Area F2 | Area F3 | Area F4 | Area F5 | Area F6 |
|-----------------|-------|-----------|------|--------|----------|-----|-------|----|----------|------------------------------------|-------------|---------|---------|---------|---------|---------|---------|
| R.VIIYNPLAR.S Y | 50.81 | 1057.6284 | 9    | 0.8    | 529.8219 | 2   | 50.08 | 1  |          | F1:15258 12112021_RID_2349_DP1.raw | 1.4791E5    |         |         |         |         |         |         |

total 1 peptides

LAB27223.1  
[back to list](#)

[Protein Coverage](#) | [Supporting Peptides](#) |  
Protein Coverage:

|     |         |        |        |        |        |         |        |          |        |        |         |         |         |         |         |         |            |
|-----|---------|--------|--------|--------|--------|---------|--------|----------|--------|--------|---------|---------|---------|---------|---------|---------|------------|
| 1   | STWGSLS | CRN    | RVGVMG | FPPVA  | LVFFLG | GAVL    | RGS    | AVKCGYQ  | SCPVT  | KPDM   | LN      | VHLIP   | HTD     | DVG     | WLKTVDQ | YFFG    | VNRNDIQ    |
| 81  | HAGVQY  | IILDS  | VIPQL  | LADPS  | KRFIY  | VEVVF   | FAR    | WWELQTE  | AMHQ   | AVRQLV | AEGR    | LEFVNG  | GWC     | MNDEASV | HYNA    | VIDQMS  |            |
| 161 | LGLHFL  | KETF   | GECSR  | PRVAW  | HIDPF  | GHSRE   | QAS    | LFAQMGY  | DGFF   | LGRIDY | QDK     | FHRESLR | EME     | QLWRASR | NLD     | PFSADLF |            |
| 241 | TGILP   | NGYNP  | PMSLC  | WDQIC  | SDNP   | IVDDDS  | DENN   | VENIVA   | YFLG   | TAAQA  | KHYR    | TNHIVM  | TMGS    | DFQYEN  | ALL     | WYKNMDK |            |
| 321 | LIYHV   | NAQQV  | RGS    | RVN    | VLYS   | TPSC    | YLWELN | KAN      | MTW    | SMKY   | DDFF    | PYADGP  | HQF     | WTGYFTS | RPAL    | KRYERL  | SNNFLQICNQ |
| 401 | LEVLV   | GTKAN  | FGPY   | GNANS  | VLR    | KAMAVAQ | HHDA   | VSGTAK   | QHVT   | NDYAKQ | LSIG    | WDACQI  | VMN     | NAFANLL | GST     | ENFIYCT |            |
| 481 | YLNIS   | ACSLT  | EVAPA  | FR     | VII    | YNPLAR  | SVDW   | NIRL     | PVNGSH | YSV    | VAPDGQN | IMNE    | IIPVSS  | FTRA    | VRHNRG  | SATNEL  | LVFQA      |
| 561 | SLPPL   | GYRTY  | SIAR   | LSDK   | KDS    | AHPRL   | LKRL   | PQPA     | AHLTP  | LIENE  | HLQVL   | FDP     | NTGLMKE | IRNL    | KKNISL  | PLSQ    | SFLWYN     |
| 641 | ASVGN   | AASFQ  | ASGAY  | IFRPD  | TSKA   | FPPIAQ  | VG     | VYQIKTQV | VQEL   | YQNFSN | WCSQ    | VVRLYA  | GQPY    | VELEWT  | VGPI    | PIADHY  |            |
| 721 | GKEII   | SRFET  | NLQT   | GGLFYT | DSNG   | REILER  | RRDY   | RVTWNL   | NQTE   | PVAGNY | YPVN    | TRMYIK  | DQKT    | QLTVLT  | DRSQ    | GGSSLT  |            |
| 801 | DGSLE   | LMVHR  | RLH    | DDNR   | GV     | QEPL    | LEPGDY | HNGL     | VVRGRH | LIF    | LDTVES  | AEQ     | HRLWAQ  | EYMA    | PQVVL   | PD      | SHDIVKEF   |
| 881 | SALRH   | ALPSN  | VHLL   | TLAQWE | PDAV   | LIRLEH  | QFEY   | GEAVNG   | SLPV   | TINLLN | LFSS    | FNITV   | QEMN    | LSANQK  | RENV    | SRLIWQ  |            |
| 961 | STQG    | IAAERQ | SGTRL  | DPAHI  | ELSP   | MQIRT   | LLQ    | IRY      |        |        |         |         |         |         |         |         |            |

Supporting Peptides:

| Peptide         | Uniq  | -10lgP    | Mass | Length | ppm      | m/z | z     | RT | Fraction | Scan                               | Source File | Area F1 | Area F2 | Area F3 | Area F4 | Area F5 | Area F6 |
|-----------------|-------|-----------|------|--------|----------|-----|-------|----|----------|------------------------------------|-------------|---------|---------|---------|---------|---------|---------|
| R.VIIYNPLAR.S Y | 50.81 | 1057.6284 | 9    | 0.8    | 529.8219 | 2   | 50.08 | 1  |          | F1:15258 12112021_RID_2349_DP1.raw | 1.4791E5    |         |         |         |         |         |         |

total 1 peptides

XP\_032065032.1  
[back to list](#)

[Protein Coverage](#) | [Supporting Peptides](#) |  
Protein Coverage:

|     |        |       |        |       |       |         |       |         |        |        |        |         |        |        |         |         |        |
|-----|--------|-------|--------|-------|-------|---------|-------|---------|--------|--------|--------|---------|--------|--------|---------|---------|--------|
| 1   | MIIAVR | MSCW  | KGVGT  | MGFHV | ALVFF | LGGAV   | LGG   | SAVRCGY | QSCP   | VTKPDM | LN     | VHLIP   | HTH    | DDV    | GWLKTVD | QYFF    | GVRNDI |
| 81  | QHAGV  | QYILD | SVIPQ  | LLADP | SKRFI | YVEV    | FFAR  | WWGLQT  | EAMR   | QAVRQL | VAEG   | RLEFVN  | GGW    | CNDEAS | VHYS    | AVIDQM  |        |
| 161 | SLGLQ  | FLKET | FGECAR | PRVA  | WHIDP | FGHSR   | EQAS  | LFAQMG  | YDGF   | FLGRID | YQDK   | SHRESL  | REME   | QLWRAS | RNLD    | PPAADL  |        |
| 241 | FTGIL  | PNGYN | PPMSLC | WDQI  | CSDNP | IVDD    | SDENN | VENIV   | AYFL   | GTA    | AAVQ   | AKHY    | RTNHIV | MTMG   | SDFQYE  | NALL    | WYKNMD |
| 321 | KLIYH  | VNAQQ | LKGSH  | VNVFY | STPSC | YLWEL   | NKAN  | MTWSIK  | YDDF   | FPYADG | PHQF   | WTGYFT  | SRPA   | FKRYER | LSNN    | FLQICN  |        |
| 401 | QLEVL  | VGTKA | NFGPY  | GNANS | SVLRQ | AMAVA   | QHHD  | AVSGTA  | KQHV   | TNDYAK | QLSIG  | WDTCQ   | IVMN   | NALANL | LGST    | ENFIYC  |        |
| 481 | TYLNIS | ACPL  | TEATPA | FR    | VI    | IYNPLAR | SVD   | WNVRL   | PVNGS  | HYSV   | VAPDGQ | NILNEL  | IPVS   | SFTRA  | VRHNR   | GSAINEL | LVFQ   |
| 561 | ASLPP  | LGVRT | YSISRL | SGRD  | SARPK | LLKRL   | RPQQ  | AGAHFT  | PLIENE | HLQV   | LFD    | PNTGLMK | EIRNL  | DKNIS  | LPLF    | QSFLWY  |        |
| 641 | NASVG  | DASYS | QASGAY | IFRP  | DTSKA | FPPIAQ  | KVG   | VYQIKTQ | VVQEL  | YQNFS  | NWCS   | QVRLY   | AGQP   | YVELEW | TVGP    | IPIDQ   |        |
| 721 | YGKEI  | ISRFE | TNLQT  | GGHFY | TDSNG | REILE   | RRRD  | YRATWN  | LSQT   | EPVAGN | YYPN   | TRIYI   | KDQK   | QLTVL  | TDRS    | QGGSSL  |        |
| 801 | ADGSLE | LMVH  | RLLH   | DDNRG | VQEPL | LEFGE   | YHNGL | VVRGR   | HLVFL  | DTVES  | SAEK   | HRLWAQ  | QEYMA  | PQVVL  | TPDS    | H       | DIVKE  |
| 881 | FSALRH | ALPL  | NVHLL  | TLAQW | EPDAV | LIRLE   | HQFEY | GEAVN   | GSLP   | VAINLL | NLFSS  | FNIIIS  | VQEV   | NLSANQ | KREN    | VSRLTW  |        |
| 961 | QSTQG  | MAAER | RS     | TVLDP | PAH   | IELFP   | MQIRT | FLV     | QIRY   |        |        |         |        |        |         |         |        |

Supporting Peptides:

| Peptide         | Uniq  | -10lgP    | Mass | Length | ppm      | m/z | z     | RT | Fraction | Scan                               | Source File | Area F1 | Area F2 | Area F3 | Area F4 | Area F5 | Area F6 |
|-----------------|-------|-----------|------|--------|----------|-----|-------|----|----------|------------------------------------|-------------|---------|---------|---------|---------|---------|---------|
| R.VIIYNPLAR.S Y | 50.81 | 1057.6284 | 9    | 0.8    | 529.8219 | 2   | 50.08 | 1  |          | F1:15258 12112021_RID_2349_DP1.raw | 1.4791E5    |         |         |         |         |         |         |

total 1 peptides

XP\_034262785.1  
[back to list](#)

[Protein Coverage](#) | [Supporting Peptides](#) |  
Protein Coverage:

Supporting Peptides:

**total 1 peptides**

[back to list](#)

Protein Coverage:

Supporting Peptides:

**total 1 peptides**

[back to list](#)

Protein Coverage:

Supporting Peptides:

**total 1 peptides**

[back to list](#)

209/224

Protein Coverage:

1MKVLRFFAPV LCLLWLQGVC LAVDIEEEEG VLVLSANFD QALEQYPNIL VEFYAPWCGH CKALAPEYVK AAKLLSENS

81EIRLAKVDAT EESELAQQFG VRGYPTIKFF KNGDKSSPKE YTAGREADDI LNWLKKRTGP AATTLADVAA AEELVESNEV

161AVIGFFKDAE SDVAKEFLLA AEAIDDIPFG ITSksDIFAK YQLKKDGVAL FKKFDEGRNN FDGEITKDNL LNFiksnQLP

241LVIEFTEQTA PKIFGGEIKT HILLFLPKSV EEYQGKLDNF KAAAEDFRgK ILFIYIDSDH SDNQRILEFF GLKKEECPAI

321RLITLEEEMT KYKPESDELT PENIRDFCHK FLEGKVKPHL MSQEISDDWD KQPVKVLVGK NFEEVAFDEN KNVFVEFYAP

401WCGHCKQLAP IWDKLGETYK DHENIIIAKM DSTVNEVEV VHSFPTLKY FPAGPDRTV DYNGERTLEG FKKFLESgGK

481DGGVDENDLE DLEDAEEEPD VEEEEEEETG AKKDEL

Supporting Peptides:

| Peptide          | Uniq  | -10lgP    | Mass | Length | ppm      | m/z | z     | RT | Fraction | Scan    | Source File               | Area F1 | Area F2 | Area F3 | Area F4 | Area F5 | Area F6 | Area |
|------------------|-------|-----------|------|--------|----------|-----|-------|----|----------|---------|---------------------------|---------|---------|---------|---------|---------|---------|------|
| K.LLSENSEIR.L Y  | 50.02 | 1059.5560 | 9    | 0.3    | 530.7855 | 2   | 30.07 | 7  |          | F7:7892 | 17112021_RID_2349_DP7.raw |         |         |         |         |         |         | 1.33 |
| total 1 peptides |       |           |      |        |          |     |       |    |          |         |                           |         |         |         |         |         |         |      |

TRINITY\_DN159  
[back to list](#)

[Protein Coverage](#) | [Supporting Peptides](#) |

Protein Coverage:

1MKLLRFFAPV LCLLWLQGVC LAVDIEEEEG VLVLKAANFD QALEQYPNIL VEFYAPWCGH CKALAPEYVK AAKLLSENS

81EIRLAKVDAT EESELAQQFG VRGYPTIKFF KNGDKSSPKE YTAGREADDI LNWLKKRTGP AATTLADVAA AEELVESNEV

161AVIGFFKDVE SDMAKEFLLA AEAIDDIPFG ITSksDIFAK YQLKKDGVAL FKKFDEGRNN FDGEITKDNL LNFiksnQLP

241LVIEFTEQTA PKIFGGEIKT HILLFLPKSV EEYQGKLDNF KAAAEDFKgK ILFIYIDGDH SDNQRILEFF GLKKEECPAI

321RLITLEEEMT KYKPESDELT PENIKDFCHK FLEGKVKVIV LFFPNGVFGA GSHVGKS

Supporting Peptides:

| Peptide          | Uniq  | -10lgP    | Mass | Length | ppm      | m/z | z     | RT | Fraction | Scan    | Source File               | Area F1 | Area F2 | Area F3 | Area F4 | Area F5 | Area F6 | Area |
|------------------|-------|-----------|------|--------|----------|-----|-------|----|----------|---------|---------------------------|---------|---------|---------|---------|---------|---------|------|
| K.LLSENSEIR.L Y  | 50.02 | 1059.5560 | 9    | 0.3    | 530.7855 | 2   | 30.07 | 7  |          | F7:7892 | 17112021_RID_2349_DP7.raw |         |         |         |         |         |         | 1.33 |
| total 1 peptides |       |           |      |        |          |     |       |    |          |         |                           |         |         |         |         |         |         |      |

TRINITY\_DN159  
[back to list](#)

[Protein Coverage](#) | [Supporting Peptides](#) |

Protein Coverage:

1MKLLRFFAPV LCLLWLQGVC LAVDIEEEEG VLVLKAANFD QALEQYPNIL VEFYAPWCGH CKALAPEYVK AAKLLSENS

81EIRLAKVDAT EESELAQQFG VRGYPTIKFF KNGDKSSPKE YTAGREADDI LNWLKKRTGP AATTLADVAA AEELVESNEV

161AVIGFFKDVE SDMAKEFLLA AEAIDDIPFG ITSksDIFAK YQLKKDGVAL FKKFDEGRNN FDGEITKDNL LNFiksnQLP

241LVIEFTEQTA PKIFGGEIKT HILLFLPKSV EEYQGKLDNF KAAAEDFKgK ILFIYIDGDH SDNQRILEFF GLKKEECPAI

321RLITLEEEMT KYKPESDELT PENIKDFCHK FLEGKVKPHL MSQEISDDWD KHPVKVLVGN NFEEVAFDEN KNVFVEFYAP

401WCGHCKQLAP IWDKLGETYK DHENIIIAKM DATVNEVEAV VHSFPTLKY FPAGPDRTVS QLYIET

Supporting Peptides:

| Peptide          | Uniq  | -10lgP    | Mass | Length | ppm      | m/z | z     | RT | Fraction | Scan    | Source File               | Area F1 | Area F2 | Area F3 | Area F4 | Area F5 | Area F6 | Area |
|------------------|-------|-----------|------|--------|----------|-----|-------|----|----------|---------|---------------------------|---------|---------|---------|---------|---------|---------|------|
| K.LLSENSEIR.L Y  | 50.02 | 1059.5560 | 9    | 0.3    | 530.7855 | 2   | 30.07 | 7  |          | F7:7892 | 17112021_RID_2349_DP7.raw |         |         |         |         |         |         | 1.33 |
| total 1 peptides |       |           |      |        |          |     |       |    |          |         |                           |         |         |         |         |         |         |      |

TRINITY\_DN159  
[back to list](#)

[Protein Coverage](#) | [Supporting Peptides](#) |

Protein Coverage:

1MEGIGRKYTI HLMLCLLDVQ FFPPTDAPWC GHCKALAPEY VKAAAKLLSE NSEIRLAKVD ATEESELAQQ FGVRGYPTIK

81FFKNGDKSSP KEYTAGREAD DILNWLKKRT GPAATTLADV AAAEELVESN EVAVIGFFKD VESDMAKEFL LAEAIDDIP

161FGITSksDIF AKYQLKKDG V ALFKKFDEGR NNFDEGITKD NLLNFiksnQ LPLVIEFTEQ TAPKIFGGEI KTHILLFLPK

241SVEEYQGKLD NFKKAAEDFK GKILFIYIDG DHSDNQRILE FFGLKKEEC P AIRLITLEEE MTKYKPESDE LTPENIKDFC

321HKFLEGKVKP HLMSQEISDD WDKHPVKVLV GNNFEEVAFD ENKNVFVEFY APWCGHCKQL APIWDKLGET YKDHENIIIA

401KMDATVNEVE AVKVHSFPTL KYFPAGPDRT VVDYNGDRTL EGFKKFLESg GKDGGVDEND LEDLEDAEAE PDVEEDEET

481GAKKDEL

Supporting Peptides:

| Peptide          | Uniq  | -10lgP    | Mass | Length | ppm      | m/z | z     | RT | Fraction | Scan    | Source File               | Area F1 | Area F2 | Area F3 | Area F4 | Area F5 | Area F6 | Area |
|------------------|-------|-----------|------|--------|----------|-----|-------|----|----------|---------|---------------------------|---------|---------|---------|---------|---------|---------|------|
| K.LLSENSEIR.L Y  | 50.02 | 1059.5560 | 9    | 0.3    | 530.7855 | 2   | 30.07 | 7  |          | F7:7892 | 17112021_RID_2349_DP7.raw |         |         |         |         |         |         | 1.33 |
| total 1 peptides |       |           |      |        |          |     |       |    |          |         |                           |         |         |         |         |         |         |      |

AFJ50884.1

[back to list](#)

[Protein Coverage](#) | [Supporting Peptides](#) |

Protein Coverage:

|     |                        |        |       |        |        |        |      |        |      |        |        |        |        |        |        |         |                      |      |
|-----|------------------------|--------|-------|--------|--------|--------|------|--------|------|--------|--------|--------|--------|--------|--------|---------|----------------------|------|
| 1   | MKVL                   | RFFAPV | LCLL  | WLGQVC | LAVD   | IEEEEG | VLVL | KSANFD | QALE | QYPN   | IL     | VEFY   | APWCGH | CKALA  | PEYVK  | AAAK    | <b><u>LLSENS</u></b> |      |
| 81  | <b><u>EIR</u></b> LAKV | DAT    | EESE  | LAQQFG | VRGY   | PTIKFF | KNGD | KSSPKE | YTAG | READDI | LNWL   | KKRTGP | AATL   | ADVAA  | AEEL   | VESNEV  |                      |      |
| 161 | AVIG                   | FFKDVE | SDVA  | KEFLLA | AEAID  | DIPFG  | ITSK | SDIFAK | YQLK | KD     | GVAL   | FKKF   | DEGRNN | FDGE   | ITKDNL | LNFI    | KS                   | NQLP |
| 241 | LVIE                   | FTEQTA | PKIF  | GGEIKT | HILL   | FLPKSV | EEYQ | GKLDNF | KTAA | EDFRGK | ILFI   | YIDSDH | SDNQ   | RILEFF | GLK    | KEECPAI |                      |      |
| 321 | RLIT                   | LEEEMT | KYP   | SEDELT | PENIR  | DFCHK  | FLEG | KV     | PHL  | MSQE   | ISDDWD | KQPV   | KVLVGK | NFEE   | VAFDEN | KNVF    | VEFYAP               |      |
| 401 | WCGH                   | CKQLAP | IWDK  | LGETYK | DHEN   | IIIAKM | DSTV | NEVEVV | KVHS | FPTLKY | FPAG   | PDRTVV | DYNG   | ERTLEG | FKKF   | FLESGGK |                      |      |
| 481 | DGGV                   | DENDLE | DLEDA | EEEPD  | VEEEEE | EEEEET | GAKK | DEL    |      |        |        |        |        |        |        |         |                      |      |

Supporting Peptides:

| Peptide          | Uniq  | -10lgP    | Mass | Length | ppm      | m/z | z     | RT | Fraction | Scan    | Source File               | Area F1 | Area F2 | Area F3 | Area F4 | Area F5 | Area F6 | Area F7 |
|------------------|-------|-----------|------|--------|----------|-----|-------|----|----------|---------|---------------------------|---------|---------|---------|---------|---------|---------|---------|
| K.LLSENSEIR.L Y  | 50.02 | 1059.5560 | 9    | 0.3    | 530.7855 | 2   | 30.07 | 7  |          | F7:7892 | 17112021_RID_2349_DP7.raw |         |         |         |         |         |         | 1.33    |
| total 1 peptides |       |           |      |        |          |     |       |    |          |         |                           |         |         |         |         |         |         |         |

JAI12151.1

[back to list](#)

[Protein Coverage](#) | [Supporting Peptides](#) |

Protein Coverage:

|     |                   |        |      |       |        |      |        |        |      |      |        |      |      |      |      |      |       |      |      |      |                      |      |      |      |    |  |  |  |
|-----|-------------------|--------|------|-------|--------|------|--------|--------|------|------|--------|------|------|------|------|------|-------|------|------|------|----------------------|------|------|------|----|--|--|--|
| 1   | MKVL              | RFFAPV | LCLL | WL    | LGQVC  | LAVD | IEEEEG | VLVL   | KSAN | FD   | QALE   | QYPN | IL   | VEFY | APWC | GH   | CKAL  | AP   | EYVK | AAAK | <b><u>LLSENS</u></b> |      |      |      |    |  |  |  |
| 81  | <b><u>EIR</u></b> | LAKV   | DAT  | EESE  | LAQQ   | FG   | VRGY   | PTIK   | FF   | KNGD | KSSPKE | YTAG | READ | DI   | LNWL | KKRT | GP    | AATL | ADVA | A    | AEEL                 | VES  | NEV  |      |    |  |  |  |
| 161 | AVIG              | FFKD   | VE   | SDVA  | KEFL   | LA   | AEAID  | DIPF   | G    | ITSK | SDIF   | AK   | YQLK | KD   | GVAL | FKKF | DEGR  | NN   | FDGE | ITKD | NL                   | LNFI | KS   | NQ   | LP |  |  |  |
| 241 | LVIE              | FTEQ   | TA   | PKIF  | GGEIK  | T    | HILL   | FLPK   | SV   | EEYQ | GKLD   | NF   | KTAA | EDFR | GR   | ILFI | YIDSD | H    | SDNQ | RILE | FF                   | GLK  | KEE  | CPAI |    |  |  |  |
| 321 | RLIT              | LEEEM  | T    | KYP   | SEDEL  | T    | PENIR  | DFCH   | K    | FLEG | KV     | PHL  | MSQE | ISDD | WD   | KQPV | KVLV  | GK   | NFEE | VAFD | EN                   | KNVF | VEFY | AP   |    |  |  |  |
| 401 | WCGH              | CKQL   | AP   | IWDK  | LGETYK | DHEN | IIIA   | KM     | DSTV | NEVE | EV     | KVHS | FPTL | KY   | FPAG | PDRT | TV    | DYNG | ERTL | EG   | FKKF                 | FLES | GGK  |      |    |  |  |  |
| 481 | DGGV              | DEND   | LE   | DLEDA | EEEP   | D    | VEEEE  | EEEEET |      | GAKK | DEL    |      |      |      |      |      |       |      |      |      |                      |      |      |      |    |  |  |  |

Supporting Peptides:

| Peptide          | Uniq  | -10lgP    | Mass | Length | ppm      | m/z | z     | RT | Fraction | Scan    | Source File               | Area F1 | Area F2 | Area F3 | Area F4 | Area F5 | Area F6 | Area F7 |
|------------------|-------|-----------|------|--------|----------|-----|-------|----|----------|---------|---------------------------|---------|---------|---------|---------|---------|---------|---------|
| K.LLSENSEIR.L Y  | 50.02 | 1059.5560 | 9    | 0.3    | 530.7855 | 2   | 30.07 | 7  |          | F7:7892 | 17112021_RID_2349_DP7.raw |         |         |         |         |         |         | 1.33    |
| total 1 peptides |       |           |      |        |          |     |       |    |          |         |                           |         |         |         |         |         |         |         |

JAG67907.1

[back to list](#)

[Protein Coverage](#) | [Supporting Peptides](#) |

Protein Coverage:

|     |      |           |          |          |          |          |          |          |      |      |     |      |      |      |      |      |      |      |      |     |      |     |      |      |      |      |    |      |    |    |    |
|-----|------|-----------|----------|----------|----------|----------|----------|----------|------|------|-----|------|------|------|------|------|------|------|------|-----|------|-----|------|------|------|------|----|------|----|----|----|
| 1   | MVK  | <b>VG</b> | <b>V</b> | <b>N</b> | <b>G</b> | <b>F</b> | <b>G</b> | <b>R</b> | IGRL | VT   | RAA | FVSG | KVEV | VA   | INDP | FIDL | NY   | MTYM | FKYD | ST  | HGRF | HG  | TV   | HA   | ENGK | LVIN | GH | AITV | FQ | ER | DP |
| 81  | ANIK | WGEA      | GA       | DYVV     | ESTG     | VF       | TTEK     | KAS      | AHL  | KGG  | AKR | VIIS | APS  | ADAP | MFV  | MGVN | HEKY | DK   | SLKV | VSN | ASC  | TTN | CLAP | LAK  |      |      |    |      |    |    |    |
| 161 | VIHD | NYG       | IVE      | GLMT     | TVH      | AIT      | ATQK     | TV       | DGPS | GKL  | WRD | GRGA | AQNI | PAST | G    | AAKA | VGV  | KVIP | ELNG | KLT | GMA  | FRV | PTPN | VSV  |      |      |    |      |    |    |    |
| 241 | VDLT | CRLE      | KP       | AKYD     | DIK      | KV       | KAASE    | GPM      | KG   | ILGY | TED | QVV  | SSDF | NGD  | THS  | SIFD | AA   | AGIA | LNDH | FVK | LIS  | WYD | NEY  | GYSN |      |      |    |      |    |    |    |
| 321 | RVVD | LMV       | HMA      | SKE      |          |          |          |          |      |      |     |      |      |      |      |      |      |      |      |     |      |     |      |      |      |      |    |      |    |    |    |

Supporting Peptides:

| Peptide          | Uniq  | -10lgP   | Mass | Length | ppm      | m/z | z     | RT | Fraction | Scan    | Source File               | Area F1 | Area F2 | Area F3 | Area F4 | Area F5 | Area F6 | Area F7 |
|------------------|-------|----------|------|--------|----------|-----|-------|----|----------|---------|---------------------------|---------|---------|---------|---------|---------|---------|---------|
| K.VGVNGFGR.I Y   | 49.83 | 804.4242 | 8    | 0.7    | 403.2197 | 2   | 30.24 | 4  |          | F4:7860 | 17112021_RID_2349_DP4.raw |         |         |         | 1.365E5 |         |         | 1.3546E |
| total 1 peptides |       |          |      |        |          |     |       |    |          |         |                           |         |         |         |         |         |         |         |

TRINITY\_DN3991

[back to list](#)

[Protein Coverage](#) | [Supporting Peptides](#) |

Protein Coverage:

|     |      |           |          |          |          |          |          |          |      |      |     |      |      |      |      |      |      |      |      |     |      |     |      |      |      |    |      |    |    |    |  |
|-----|------|-----------|----------|----------|----------|----------|----------|----------|------|------|-----|------|------|------|------|------|------|------|------|-----|------|-----|------|------|------|----|------|----|----|----|--|
| 1   | MVK  | <b>VG</b> | <b>V</b> | <b>N</b> | <b>G</b> | <b>F</b> | <b>G</b> | <b>R</b> | IGRL | VT   | RAA | ILRG | NVEV | VA   | INDP | FIDL | NY   | MVYM | FKYD | ST  | HGRW | KGD | VKA  | EGGK | LVID | GH | AITI | FQ | ER | DP |  |
| 81  | SNIK | WGEA      | GA       | TYVV     | ESTG     | VF       | TTEK     | AST      | HL   | KGG  | AKK | VIIS | APS  | ADAP | MFV  | GVGN | HQKY | DP   | AVNV | VSN | ASC  | TTN | CLAP | LAK  |      |    |      |    |    |    |  |
| 161 | VIND | NF        | VILE     | GLMT     | TVH      | AYT      | ATQK     | TV       | DGPS | GKL  | WRD | GRGA | HQNI | PAST | G    | AAKA | VGV  | KVIP | ELNG | KIT | GMA  | FRV | PTPN | VSV  |      |    |      |    |    |    |  |
| 241 | VDLT | VRLE      | KP       | ATYD     | AIK      | AKV      | KEA      | ANG      | PMKG | ILGY | TED | QVV  | STDF | NGD  | TRS  | SIFD | AG   | AGIA | LNDH | FVK | LVT  | WYD | NEF  | GYSN |      |    |      |    |    |    |  |
| 321 | RVVD | LV        | LYMV     | SKDK     |          |          |          |          |      |      |     |      |      |      |      |      |      |      |      |     |      |     |      |      |      |    |      |    |    |    |  |

Supporting Peptides:

| Peptide          | Uniq  | -10lgP   | Mass | Length | ppm      | m/z | z     | RT | Fraction | Scan    | Source File               | Area F1 | Area F2 | Area F3 | Area F4 | Area F5 | Area F6 | Area F7 |
|------------------|-------|----------|------|--------|----------|-----|-------|----|----------|---------|---------------------------|---------|---------|---------|---------|---------|---------|---------|
| K.VGVNGFGR.I Y   | 49.83 | 804.4242 | 8    | 0.7    | 403.2197 | 2   | 30.24 | 4  |          | F4:7860 | 17112021_RID_2349_DP4.raw |         |         |         | 1.365E5 |         |         | 1.3546E |
| total 1 peptides |       |          |      |        |          |     |       |    |          |         |                           |         |         |         |         |         |         |         |

CAJ01683.1

[back to list](#)

[Protein Coverage](#) | [Supporting Peptides](#)

Protein Coverage:

1 MMQVLLVTIC LAVFPYEGSS IILES GNVD YEIVYPQKVT AMPIEAILQP EQKYEDVMQY EFEVNGEPVV LHLEKNKDLF  
81 SEDYSETYYT PDGREITTNL PVEDHCYYHG RLQNDHSSA IISACNGLKG HFKLRGETYL IEPLKVPDSE AHAVYKYENI  
161 EKEDEAPKMC GVTQTNWESD EPIKEASQLF ATSEQKSYD RFRHIELVIV VDHRMVEKYN GNLRKIRRI YQIVNINLQI  
241 YIFMNI RVPV VGVEFWTNGD LINVTSEAEA TLNSFGWRA SYLLSRKNHD HAQLFTAIDL EGLTIGMAPM AGMCQSERSV  
321 GIFEDYSPVD HVVAVIIAHE MGHNLGIFHD VHQCNCGANS CIMYAKISNP PPMYFSDCSQ EQYQFFLDNY KPDCTLIRPP  
401 R**TDIVSPFVC** **GNDLLEK**GEE CDCGSPENCQ NPCCDAASCK LHSWIECEFG ECCEQCRFKP AGTECRGIRN ECDLPEYCTG  
481 QSAECPIDRS HRNGKPLNN YGYCYNGTCP IMYHQCYALF GPKAVVGQDV CFEENKRGES YFYCRKENDV KIPCAPEDIK  
561 CGRLFCRHI YECRYDSEN PNYGMVEEGT KCGDGKVCCK RHCVDVTAY

Supporting Peptides:

| Peptide                         | Uniq  | -10lgP    | Mass | Length | ppm      | m/z | z     | RT | Fraction | Scan                               | Source File | Area F1 | Area F2 | Area F3 |
|---------------------------------|-------|-----------|------|--------|----------|-----|-------|----|----------|------------------------------------|-------------|---------|---------|---------|
| R.TDIVSP PVC(+57.02)GNDLLEK.G Y | 48.76 | 1755.8712 | 16   | 0.4    | 878.9432 | 2   | 46.31 | 3  |          | F3:13400 17112021_RID_2349_DP3.raw |             |         |         | 2.178   |

ADW54336.1

[back to list](#)

[Protein Coverage](#) | [Supporting Peptides](#)

Protein Coverage:

1 MMQVLLVTIC LAVFPYEGSS IILES GNVD YEIVYPQKVT AMPIEAILQP EQKYEDVMQY EFEVNGEPVV LHLEKNKDLF  
81 SEDYSETYYT PDGREITTNL PVEDHCYYHG RLQND AHSSA IISAXHGLKG HFKL RGETYL IEPLKVPDSX XXXXXXXXXXXX  
161 XXXXXXXXXXXX XXXXXXXXXXXX XXXXXXXXXXXX XXXXXXXXXXXX XXXXXXXXXXXX XXXXXXXXXXXX XXXXXXXXXXXX XXXXXXXXXXXX  
241 XXXXXXXXXXXX XXXXXXXXIRR RIYQIVN ILN QIYIFMNI RV PLVGVFEFTN GD LINTSEA EATLNSFG EW RASYLLSRKN  
321 HDHAQLFTAI DLEGLTIGMA PMAGMCQSER SVGIFEDYSP VDHVVAV IIA HEMGHN LGIF HDVHQNCGA NSCIMYAKIS  
401 NPPPMYFSDC SQEQYQFFLD NYKPDCTLR PPR**TDIVSPP VCGNDLLEK** EECDCGSPEN CQNPCDAAS CKLHSWIECE  
481 FGECCEQCRF KPAGTECRGI RSECDLPEYC TGQSLDCPID HFHRNGKPCQ NNGGYCYNGI CPTMQNQCLA HFGPDVMAQ  
561 DGC FEWNKKG EGD FYCRKEN NVTIPCASED IKCGR LFC EI VPNICRRAYG DKGMVDPG TK CEDGKVCINR KCTNVNTAY

Supporting Peptides:

| Peptide                        | Uniq  | -10lgP    | Mass | Length | ppm      | m/z | z     | RT | Fraction | Scan     | Source File               | Area F1 | Area F2 | Area F3 |
|--------------------------------|-------|-----------|------|--------|----------|-----|-------|----|----------|----------|---------------------------|---------|---------|---------|
| R.TDIVSPPVC(+57.02)GNDLLEK.G Y | 48.76 | 1755.8712 | 16   | 0.4    | 878.9432 | 2   | 46.31 | 3  |          | F3:13400 | 17112021_RID_2349_DP3.raw |         |         | 2.178   |

ADW54337.1

[back to list](#)

[Protein Coverage](#) | [Supporting Peptides](#)

Protein Coverage:

1 QLFATSEQKS YYDRFRHIEL VIVVDHRMVE KYNGNLRKIR RRIYQIVNIL NQIYIFMNIR VPLVGVEFWT NGDLINVTSE  
81 AEATLNSFGE WRASYLLSRK NHDHAQLFTA IDLEGLTIGM APMAGMCQSE RSVGIFEDYS PVDHVVAVII AHEMGHNLGI  
161 FHDVHQCNCG ANSCIMYAKI SNPPPMYFSD CSQEQYQFFL DNYKPDCTLI RPPR **TDIVSP PVCGNLLEK** GEECDGCSPE  
241 NCQNPCDAA SKLHSHWIEC EFGECCPECR FKPAGTECRG IRSECDLPEY CTGQSLDCPI DHFHRNGKPC QNNNGYCYNG  
321 ICPTMQNQCL AHFGPDAVMA QDGCFEWNKK GEGDFYCRKE NNV TIPCASE DIKCGRLFCE IVPNICRRAY GDKGMVDPGT  
401 KCEDGKVCIN RKCTNVNTAY

### Supporting Peptides:

| Peptide                         | Uniq  | -10lgP  | Mass | Length | ppm    | m/z | z     | RT | Fraction | Scan | Source | File             | Area F1 | Area F2 | Area F3 |
|---------------------------------|-------|---------|------|--------|--------|-----|-------|----|----------|------|--------|------------------|---------|---------|---------|
| R.TDIVSPPPVC(+57.02)GNDLLEK.G Y | 48.76 | 1755.87 | 1216 | 0.4    | 878.94 | 32  | 46.31 | 3  | F3:13400 | 1711 | 2021   | RID 2349 DP3.raw |         |         | 2.178   |

ADW54335.1

[back to list](#)

[Protein Coverage](#) | [Supporting Peptides](#)

Protein Coverage:

1 MVEKYNGNLR KIRRRYQIV NILNQIYIFM NIRVPLVGVE FWTNGDLINV TSEAEATLNS FGEWRASYLL SRKNHDDHAQL  
81 FTAIDLEGLT IGMAPMAGMC QSERSVGIFE DYSPVDHVVA VIIAHMGNH LGIFHDVHQC NCGANSCIMY AKIREPPPMY  
161 FSDCSQEQYQ FFLDNYKPDC TLIRPPR**TDI VSPPVCGNDL LEK**GEECDG SPENCQNPCC DAASCKLHSW IECEFGECC  
241 QCRFKPAGTE CRGIRSECDL PEHCTGQSLD CPIDHFHRXG KPCQTNXGYX YNGICPTMXN QCLXHFGPXA VXAQXGXFEW  
321 XXKGXGDFXC RKENXVTLPX ASEDIKRGRL XCEIVPNICR

### Supporting Peptides:

| Peptide | Uniq -10lgP | Mass | Length | ppm | m/z | z | RT | Fraction | Scan | Source File | Area<br>F1 | Area<br>F2 | Area<br>F3 |
|---------|-------------|------|--------|-----|-----|---|----|----------|------|-------------|------------|------------|------------|
|---------|-------------|------|--------|-----|-----|---|----|----------|------|-------------|------------|------------|------------|

| Peptide                        | Uniq -10lgP | Mass      | Length | ppm | m/z      | z | RT    | Fraction | Scan     | Source File               | Area F1 | Area F2 | Area F3 |
|--------------------------------|-------------|-----------|--------|-----|----------|---|-------|----------|----------|---------------------------|---------|---------|---------|
| R.TDIVSPPVC(+57.02)GNDLLEK.G Y | 48.76       | 1755.8712 | 16     | 0.4 | 878.9432 | 2 | 46.31 | 3        | F3:13400 | 17112021_RID_2349_DP3.raw |         |         | 2.178   |

P86541.2  
[back to list](#)

| [Protein Coverage](#) | [Supporting Peptides](#) |  
Protein Coverage:

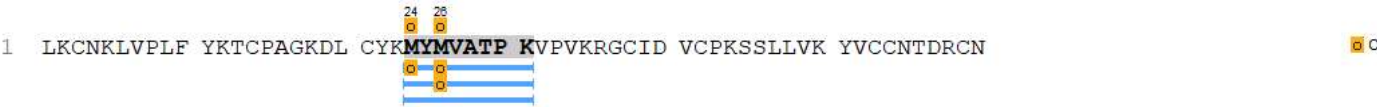

Supporting Peptides:

| Peptide                        | Uniq -10lgP | Mass     | Length   | ppm | m/z      | z        | RT    | Fraction | Scan    | Source File               | Area F1                   | Area F2  | Area F3  |
|--------------------------------|-------------|----------|----------|-----|----------|----------|-------|----------|---------|---------------------------|---------------------------|----------|----------|
| K.MYMVATPK.V                   | Y           | 47.76    | 939.4558 | 8   | 0.4      | 470.7354 | 2     | 34.94    | 7       | F7:9610                   | 17112021_RID_2349_DP7.raw |          |          |
| K.M(+15.99)YM(+15.99)VATPK.V Y | 46.26       | 971.4456 | 8        | 0.1 | 486.7301 | 2        | 25.61 | 6        | F6:6222 | 17112021_RID_2349_DP6.raw | 1.4689E5                  |          |          |
| K.MYM(+15.99)VATPK.V           | Y           | 45.65    | 955.4507 | 8   | 0.4      | 478.7328 | 2     | 30.13    | 2       | F2:7655                   | 12112021_RID_2349_DP2.raw | 4.4599E4 | 2.2353E4 |

P01440.1  
[back to list](#)

| [Protein Coverage](#) | [Supporting Peptides](#) |  
Protein Coverage:

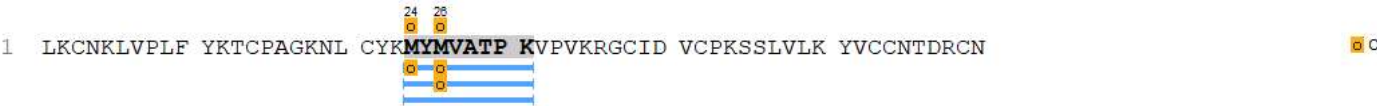

Supporting Peptides:

| Peptide                        | Uniq -10lgP | Mass     | Length   | ppm | m/z      | z        | RT    | Fraction | Scan    | Source File               | Area F1                   | Area F2  | Area F3  |
|--------------------------------|-------------|----------|----------|-----|----------|----------|-------|----------|---------|---------------------------|---------------------------|----------|----------|
| K.MYMVATPK.V                   | Y           | 47.76    | 939.4558 | 8   | 0.4      | 470.7354 | 2     | 34.94    | 7       | F7:9610                   | 17112021_RID_2349_DP7.raw |          |          |
| K.M(+15.99)YM(+15.99)VATPK.V Y | 46.26       | 971.4456 | 8        | 0.1 | 486.7301 | 2        | 25.61 | 6        | F6:6222 | 17112021_RID_2349_DP6.raw | 1.4689E5                  |          |          |
| K.MYM(+15.99)VATPK.V           | Y           | 45.65    | 955.4507 | 8   | 0.4      | 478.7328 | 2     | 30.13    | 2       | F2:7655                   | 12112021_RID_2349_DP2.raw | 4.4599E4 | 2.2353E4 |

AAC61315.1  
[back to list](#)

| [Protein Coverage](#) | [Supporting Peptides](#) |  
Protein Coverage:

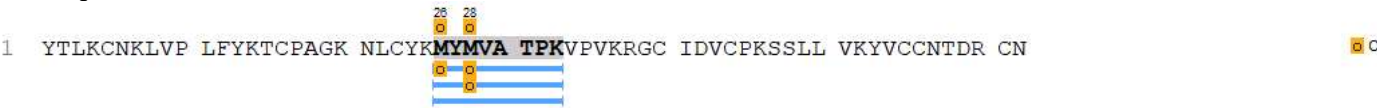

Supporting Peptides:

| Peptide                        | Uniq -10lgP | Mass     | Length   | ppm | m/z      | z        | RT    | Fraction | Scan    | Source File               | Area F1                   | Area F2  | Area F3  |
|--------------------------------|-------------|----------|----------|-----|----------|----------|-------|----------|---------|---------------------------|---------------------------|----------|----------|
| K.MYMVATPK.V                   | Y           | 47.76    | 939.4558 | 8   | 0.4      | 470.7354 | 2     | 34.94    | 7       | F7:9610                   | 17112021_RID_2349_DP7.raw |          |          |
| K.M(+15.99)YM(+15.99)VATPK.V Y | 46.26       | 971.4456 | 8        | 0.1 | 486.7301 | 2        | 25.61 | 6        | F6:6222 | 17112021_RID_2349_DP6.raw | 1.4689E5                  |          |          |
| K.MYM(+15.99)VATPK.V           | Y           | 45.65    | 955.4507 | 8   | 0.4      | 478.7328 | 2     | 30.13    | 2       | F2:7655                   | 12112021_RID_2349_DP2.raw | 4.4599E4 | 2.2353E4 |

BAU24665.1  
[back to list](#)

| [Protein Coverage](#) | [Supporting Peptides](#) |  
Protein Coverage:

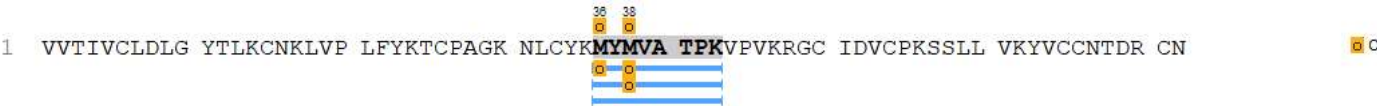

Supporting Peptides:

| Peptide | Uniq -10lgP | Mass | Length | ppm | m/z | z | RT | Fraction | Scan | Source File | Area F1 | Area F2 | Area F3 |
|---------|-------------|------|--------|-----|-----|---|----|----------|------|-------------|---------|---------|---------|
|---------|-------------|------|--------|-----|-----|---|----|----------|------|-------------|---------|---------|---------|

| Peptide                      | Uniq | -10lgP | Mass     | Length | ppm | m/z      | z | RT    | Fraction | Scan    | Source File               | Area F1  | Area F2  | A |
|------------------------------|------|--------|----------|--------|-----|----------|---|-------|----------|---------|---------------------------|----------|----------|---|
| K.MYMVATPK.V                 | Y    | 47.76  | 939.4558 | 8      | 0.4 | 470.7354 | 2 | 34.94 | 7        | F7:9610 | 17112021_RID_2349_DP7.raw |          |          | 1 |
| K.M(+15.99)YM(+15.99)VATPK.V | Y    | 46.26  | 971.4456 | 8      | 0.1 | 486.7301 | 2 | 25.61 | 6        | F6:6222 | 17112021_RID_2349_DP6.raw | 1.4689E5 |          |   |
| K.MYM(+15.99)VATPK.V         | Y    | 45.65  | 955.4507 | 8      | 0.4 | 478.7328 | 2 | 30.13 | 2        | F2:7655 | 12112021_RID_2349_DP2.raw | 4.4599E4 | 2.2353E4 |   |

O93472.1  
[back to list](#)

| [Protein Coverage](#) | [Supporting Peptides](#) |  
Protein Coverage:

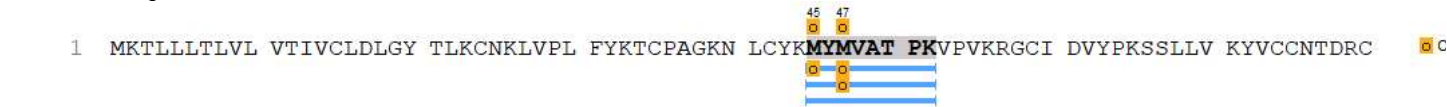

81 N  
Supporting Peptides:

| Peptide                      | Uniq | -10lgP | Mass     | Length | ppm | m/z      | z | RT    | Fraction | Scan    | Source File               | Area F1  | Area F2  | A |
|------------------------------|------|--------|----------|--------|-----|----------|---|-------|----------|---------|---------------------------|----------|----------|---|
| K.MYMVATPK.V                 | Y    | 47.76  | 939.4558 | 8      | 0.4 | 470.7354 | 2 | 34.94 | 7        | F7:9610 | 17112021_RID_2349_DP7.raw |          |          | 1 |
| K.M(+15.99)YM(+15.99)VATPK.V | Y    | 46.26  | 971.4456 | 8      | 0.1 | 486.7301 | 2 | 25.61 | 6        | F6:6222 | 17112021_RID_2349_DP6.raw | 1.4689E5 |          |   |
| K.MYM(+15.99)VATPK.V         | Y    | 45.65  | 955.4507 | 8      | 0.4 | 478.7328 | 2 | 30.13 | 2        | F2:7655 | 12112021_RID_2349_DP2.raw | 4.4599E4 | 2.2353E4 |   |

Q9PST3.1  
[back to list](#)

| [Protein Coverage](#) | [Supporting Peptides](#) |  
Protein Coverage:

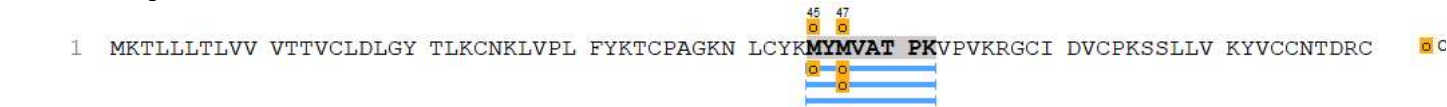

81 N  
Supporting Peptides:

| Peptide                      | Uniq | -10lgP | Mass     | Length | ppm | m/z      | z | RT    | Fraction | Scan    | Source File               | Area F1  | Area F2  | A |
|------------------------------|------|--------|----------|--------|-----|----------|---|-------|----------|---------|---------------------------|----------|----------|---|
| K.MYMVATPK.V                 | Y    | 47.76  | 939.4558 | 8      | 0.4 | 470.7354 | 2 | 34.94 | 7        | F7:9610 | 17112021_RID_2349_DP7.raw |          |          | 1 |
| K.M(+15.99)YM(+15.99)VATPK.V | Y    | 46.26  | 971.4456 | 8      | 0.1 | 486.7301 | 2 | 25.61 | 6        | F6:6222 | 17112021_RID_2349_DP6.raw | 1.4689E5 |          |   |
| K.MYM(+15.99)VATPK.V         | Y    | 45.65  | 955.4507 | 8      | 0.4 | 478.7328 | 2 | 30.13 | 2        | F2:7655 | 12112021_RID_2349_DP2.raw | 4.4599E4 | 2.2353E4 |   |

AAK49439.1  
[back to list](#)

| [Protein Coverage](#) | [Supporting Peptides](#) |  
Protein Coverage:

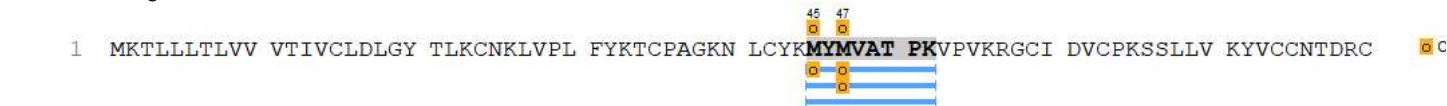

81 N  
Supporting Peptides:

| Peptide                      | Uniq | -10lgP | Mass     | Length | ppm | m/z      | z | RT    | Fraction | Scan    | Source File               | Area F1  | Area F2  | A |
|------------------------------|------|--------|----------|--------|-----|----------|---|-------|----------|---------|---------------------------|----------|----------|---|
| K.MYMVATPK.V                 | Y    | 47.76  | 939.4558 | 8      | 0.4 | 470.7354 | 2 | 34.94 | 7        | F7:9610 | 17112021_RID_2349_DP7.raw |          |          | 1 |
| K.M(+15.99)YM(+15.99)VATPK.V | Y    | 46.26  | 971.4456 | 8      | 0.1 | 486.7301 | 2 | 25.61 | 6        | F6:6222 | 17112021_RID_2349_DP6.raw | 1.4689E5 |          |   |
| K.MYM(+15.99)VATPK.V         | Y    | 45.65  | 955.4507 | 8      | 0.4 | 478.7328 | 2 | 30.13 | 2        | F2:7655 | 12112021_RID_2349_DP2.raw | 4.4599E4 | 2.2353E4 |   |

AAC27686.1  
[back to list](#)

| [Protein Coverage](#) | [Supporting Peptides](#) |  
Protein Coverage:

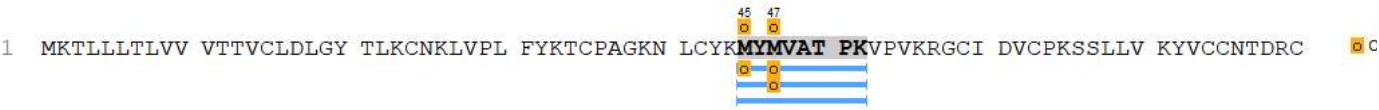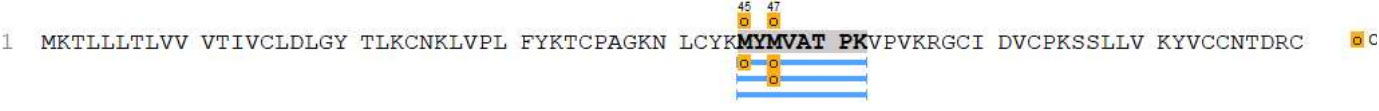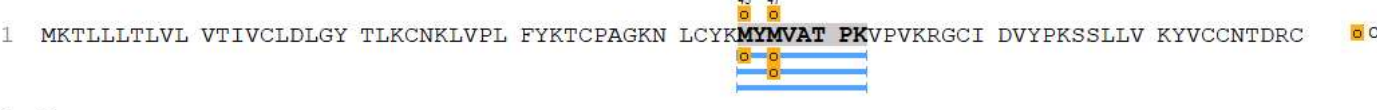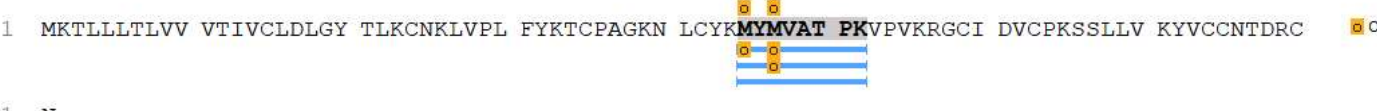

| Peptide              | Uniq | -10lgP | Mass     | Length | ppm | m/z      | z | RT    | Fraction | Scan    | Source File               | Area F1  | Area F2  | A |
|----------------------|------|--------|----------|--------|-----|----------|---|-------|----------|---------|---------------------------|----------|----------|---|
| K.MYM(+15.99)VATPK.V | Y    | 45.65  | 955.4507 | 8      | 0.4 | 478.7328 | 2 | 30.13 | 2        | F2:7655 | 12112021_RID_2349_DP2.raw | 4.4599E4 | 2.2353E4 |   |

ETE69494.1  
[back to list](#)

| [Protein Coverage](#) | [Supporting Peptides](#) |  
Protein Coverage:

|     |            |            |     |          |    |            |            |            |            |            |  |  |  |  |
|-----|------------|------------|-----|----------|----|------------|------------|------------|------------|------------|--|--|--|--|
| 1   | MAGGKAGKDS | GKTKTKTVSR | SQR | AGLQFPV  | GR | IIHRHLKSR  | TTSHGRVGAT | AAVYSAAILE | YLTAEVLELA | GNASKDLKVK |  |  |  |  |
| 81  | RITPRHLQLA | IRGDEELD   | SL  | IKATIAGG | VL | LEAIMKNGSA | AGSGTHCRKP | ASKNDKSKTN | SMKDSSASAA | GEIGKTYTKE |  |  |  |  |
| 161 | QIEGVQSIKK | CKNYEVL    | GV  | SKDAGEED | LK | KAYRKLALKF | HPDKNHAPGA | TEAFKKIGNA | YAVLSNPEKR | KQYDLTGSED |  |  |  |  |
| 241 | PCNQPGNGRF | NFHRGCE    | ADI | TPEDLFNM | FF | GGAFPTGSVH | SFSNGRSGFS | HHNQHRHSGH | EREEERGDGG | FSMFIQLMPI |  |  |  |  |
| 321 | IVLIFVSLLS | QLMVSNPP   | YS  | LYPRSSSG | QT | IQMOTENLGV | VYYVNKDFKN | EYKGPNLQKV | EKSVEEDYVS | NIRNNCWKER |  |  |  |  |
| 401 | QQKTDLLYAA | KVYRDDRL   | LRK | KAEAISMD | N  | KELERLTSIY | RG         |            |            |            |  |  |  |  |

Supporting Peptides:

| Peptide          | Uniq | -10lgP | Mass     | Length | ppm | m/z      | z | RT    | Fraction | Scan     | Source File               | Area F1 | Area F2 | Area F3 | Area F4 | Area F5  | Area F6 |
|------------------|------|--------|----------|--------|-----|----------|---|-------|----------|----------|---------------------------|---------|---------|---------|---------|----------|---------|
| R.AGLQFPVGR.I    | Y    | 47.54  | 943.5239 | 9      | 0.3 | 472.7694 | 2 | 42.70 | 5        | F5:12209 | 17112021_RID_2349_DP5.raw |         |         |         | 4.76E4  | 5.9883E4 | 9.1E4   |
| total 1 peptides |      |        |          |        |     |          |   |       |          |          |                           |         |         |         |         |          |         |

ETE65060.1  
[back to list](#)

| [Protein Coverage](#) | [Supporting Peptides](#) |  
Protein Coverage:

|    |            |            |   |            |  |            |   |            |     |          |            |            |  |  |  |  |  |
|----|------------|------------|---|------------|--|------------|---|------------|-----|----------|------------|------------|--|--|--|--|--|
| 1  | MSGRGKQGGK | ARAKAKSRSS | R | AGLQFPVGR  |  | VHRLLRKGN  | Y | AERVGAGAPV | YLA | AAVLEYLT | AEILELAGNA | ARDNKKTRII |  |  |  |  |  |
| 81 | PRHLQLAVRN | DEELNKLL   | G | VTIAQGGVLP |  | NIQAVLLPKK |   | TESHKAKGK  |     |          |            |            |  |  |  |  |  |

Supporting Peptides:

| Peptide          | Uniq | -10lgP | Mass     | Length | ppm | m/z      | z | RT    | Fraction | Scan     | Source File               | Area F1 | Area F2 | Area F3 | Area F4 | Area F5  | Area F6 |
|------------------|------|--------|----------|--------|-----|----------|---|-------|----------|----------|---------------------------|---------|---------|---------|---------|----------|---------|
| R.AGLQFPVGR.V    | Y    | 47.54  | 943.5239 | 9      | 0.3 | 472.7694 | 2 | 42.70 | 5        | F5:12209 | 17112021_RID_2349_DP5.raw |         |         |         | 4.76E4  | 5.9883E4 | 9.12E4  |
| total 1 peptides |      |        |          |        |     |          |   |       |          |          |                           |         |         |         |         |          |         |

XP\_013915314.1  
[back to list](#)

| [Protein Coverage](#) | [Supporting Peptides](#) |  
Protein Coverage:

|    |            |            |   |            |  |            |   |            |     |          |            |            |  |  |  |  |  |
|----|------------|------------|---|------------|--|------------|---|------------|-----|----------|------------|------------|--|--|--|--|--|
| 1  | MSGRGKQGGK | ARAKAKSRSS | R | AGLQFPVGR  |  | VHRLLRKGN  | Y | AERVGAGAPV | YLA | AAVLEYLT | AEILELAGNA | ARDNKKTRII |  |  |  |  |  |
| 81 | PRHLQLAVRN | DEELNKLL   | G | VTIAQGGVLP |  | NIQAVLLPKK |   | TESHKAKGK  |     |          |            |            |  |  |  |  |  |

Supporting Peptides:

| Peptide          | Uniq | -10lgP | Mass     | Length | ppm | m/z      | z | RT    | Fraction | Scan     | Source File               | Area F1 | Area F2 | Area F3 | Area F4 | Area F5  | Area F6 |
|------------------|------|--------|----------|--------|-----|----------|---|-------|----------|----------|---------------------------|---------|---------|---------|---------|----------|---------|
| R.AGLQFPVGR.V    | Y    | 47.54  | 943.5239 | 9      | 0.3 | 472.7694 | 2 | 42.70 | 5        | F5:12209 | 17112021_RID_2349_DP5.raw |         |         |         | 4.76E4  | 5.9883E4 | 9.12E4  |
| total 1 peptides |      |        |          |        |     |          |   |       |          |          |                           |         |         |         |         |          |         |

XP\_013919189.1  
[back to list](#)

| [Protein Coverage](#) | [Supporting Peptides](#) |  
Protein Coverage:

|    |            |            |   |            |  |            |   |            |     |          |            |            |  |  |  |  |  |
|----|------------|------------|---|------------|--|------------|---|------------|-----|----------|------------|------------|--|--|--|--|--|
| 1  | MSGRGKSGGK | ARAKAKSRSS | R | AGLQFPVGR  |  | VHRLLRKGN  | Y | AERVGAGAPV | YLA | AAVLEYLS | AEILELAGNA | ARDNKKTRII |  |  |  |  |  |
| 81 | PRHLQLAIRN | DEELNKLL   | G | VTIAQGGVLP |  | NIQAVLLPKK |   | TQSSKK     |     |          |            |            |  |  |  |  |  |

Supporting Peptides:

| Peptide          | Uniq | -10lgP | Mass     | Length | ppm | m/z      | z | RT    | Fraction | Scan     | Source File               | Area F1 | Area F2 | Area F3 | Area F4 | Area F5  | Area F6 |
|------------------|------|--------|----------|--------|-----|----------|---|-------|----------|----------|---------------------------|---------|---------|---------|---------|----------|---------|
| R.AGLQFPVGR.V    | Y    | 47.54  | 943.5239 | 9      | 0.3 | 472.7694 | 2 | 42.70 | 5        | F5:12209 | 17112021_RID_2349_DP5.raw |         |         |         | 4.76E4  | 5.9883E4 | 9.12E4  |
| total 1 peptides |      |        |          |        |     |          |   |       |          |          |                           |         |         |         |         |          |         |

XP\_013919188.1  
[back to list](#)

| [Protein Coverage](#) | [Supporting Peptides](#) |  
Protein Coverage:

|    |            |            |   |            |  |            |   |            |     |          |            |            |  |  |  |  |  |
|----|------------|------------|---|------------|--|------------|---|------------|-----|----------|------------|------------|--|--|--|--|--|
| 1  | MSGRGKSGGK | ARAKAKSRSS | R | AGLQFPVGR  |  | VHRLLRKGN  | Y | AERVGAGAPV | YLA | AAVLEYLS | AEILELAGNA | ARDNKKTRII |  |  |  |  |  |
| 81 | PRHLQLAIRN | DEELNKLL   | G | VTIAQGGVLP |  | NIQAVLLPKK |   | TQSSKK     |     |          |            |            |  |  |  |  |  |

Supporting Peptides:

| Peptide          | Uniq | -10lgP | Mass | Length | ppm | m/z | z | RT | Fraction | Scan | Source File | Area F1 | Area F2 | Area F3 | Area F4 | Area F5 | A |
|------------------|------|--------|------|--------|-----|-----|---|----|----------|------|-------------|---------|---------|---------|---------|---------|---|
| total 1 peptides |      |        |      |        |     |     |   |    |          |      |             |         |         |         |         |         |   |

| Peptide          | Uniq -10lgP | Mass     | Length | ppm | m/z      | z | RT    | Fraction | Scan     | Source File               | Area F1 | Area F2 | Area F3 | Area F4 | Area F5  | A  |
|------------------|-------------|----------|--------|-----|----------|---|-------|----------|----------|---------------------------|---------|---------|---------|---------|----------|----|
| R.AGLQFPVGR.V Y  | 47.54       | 943.5239 | 9      | 0.3 | 472.7694 | 2 | 42.70 | 5        | F5:12209 | 17112021_RID_2349_DP5.raw |         |         |         | 4.76E4  | 5.9883E4 | 9. |
| total 1 peptides |             |          |        |     |          |   |       |          |          |                           |         |         |         |         |          |    |

ETE65301.1  
[back to list](#)

[Protein Coverage](#) | [Supporting Peptides](#) |  
Protein Coverage:

|    |            |            |            |            |        |   |     |        |     |         |            |            |
|----|------------|------------|------------|------------|--------|---|-----|--------|-----|---------|------------|------------|
| 1  | MSGRGKSGGK | ARAKAKSRSS | RAGLQFPVGR | VHRLLRKGN  | Y      | A | ERV | GAGAPV | YLA | AVLEYLS | AEILELAGNA | ARDNKKTRII |
| 81 | PRHLQLAIRN | DEELNKLGG  | VTIAQGGVLP | NIQAVLLPKK | TQSSKK |   |     |        |     |         |            |            |

Supporting Peptides:

| Peptide          | Uniq -10lgP | Mass     | Length | ppm | m/z      | z | RT    | Fraction | Scan     | Source File               | Area F1 | Area F2 | Area F3 | Area F4 | Area F5  | A  |
|------------------|-------------|----------|--------|-----|----------|---|-------|----------|----------|---------------------------|---------|---------|---------|---------|----------|----|
| R.AGLQFPVGR.V Y  | 47.54       | 943.5239 | 9      | 0.3 | 472.7694 | 2 | 42.70 | 5        | F5:12209 | 17112021_RID_2349_DP5.raw |         |         |         | 4.76E4  | 5.9883E4 | 9. |
| total 1 peptides |             |          |        |     |          |   |       |          |          |                           |         |         |         |         |          |    |

JAG46644.1  
[back to list](#)

[Protein Coverage](#) | [Supporting Peptides](#) |  
Protein Coverage:

|    |            |            |              |           |     |          |          |            |      |        |            |
|----|------------|------------|--------------|-----------|-----|----------|----------|------------|------|--------|------------|
| 1  | MAGGKAGKDS | GKAKAKAVSR | SQRAGLQFPVGR | IIHRHLKTR | T   | T        | SHGRVGAT | AAVYSAAILE | YLTA | EVLELA | GNASKDLKVK |
| 81 | RITPRHLQLA | IRGDEELDSL | IKATIAGGGV   | IPHIHKS   | LIG | KKGQQKTA |          |            |      |        |            |

Supporting Peptides:

| Peptide          | Uniq -10lgP | Mass     | Length | ppm | m/z      | z | RT    | Fraction | Scan     | Source File               | Area F1 | Area F2 | Area F3 | Area F4 | Area F5  | A   |
|------------------|-------------|----------|--------|-----|----------|---|-------|----------|----------|---------------------------|---------|---------|---------|---------|----------|-----|
| R.AGLQFPVGR.I Y  | 47.54       | 943.5239 | 9      | 0.3 | 472.7694 | 2 | 42.70 | 5        | F5:12209 | 17112021_RID_2349_DP5.raw |         |         |         | 4.76E4  | 5.9883E4 | 9.1 |
| total 1 peptides |             |          |        |     |          |   |       |          |          |                           |         |         |         |         |          |     |

JAI09932.1  
[back to list](#)

[Protein Coverage](#) | [Supporting Peptides](#) |  
Protein Coverage:

|    |            |            |              |           |     |          |          |            |      |        |            |
|----|------------|------------|--------------|-----------|-----|----------|----------|------------|------|--------|------------|
| 1  | MAGGKAGKDS | GKTKTKTVSR | SQRAGLQFPVGR | IIHRHLKSR | T   | T        | SHGRVGAT | AAVYSAAILE | YLTA | EVLELA | GNASKDLKVK |
| 81 | RITPRHLQLA | IRGDEELDSL | IKATIAGGGV   | IPHIHKS   | LIG | KKGQQKTV |          |            |      |        |            |

Supporting Peptides:

| Peptide          | Uniq -10lgP | Mass     | Length | ppm | m/z      | z | RT    | Fraction | Scan     | Source File               | Area F1 | Area F2 | Area F3 | Area F4 | Area F5  | A   |
|------------------|-------------|----------|--------|-----|----------|---|-------|----------|----------|---------------------------|---------|---------|---------|---------|----------|-----|
| R.AGLQFPVGR.I Y  | 47.54       | 943.5239 | 9      | 0.3 | 472.7694 | 2 | 42.70 | 5        | F5:12209 | 17112021_RID_2349_DP5.raw |         |         |         | 4.76E4  | 5.9883E4 | 9.1 |
| total 1 peptides |             |          |        |     |          |   |       |          |          |                           |         |         |         |         |          |     |

XP\_007430054.1  
[back to list](#)

[Protein Coverage](#) | [Supporting Peptides](#) |  
Protein Coverage:

|    |            |            |              |           |     |          |          |            |      |        |            |
|----|------------|------------|--------------|-----------|-----|----------|----------|------------|------|--------|------------|
| 1  | MAGGKAGKDS | GKAKAKAVSR | SQRAGLQFPVGR | IIHRHLKTR | T   | T        | SHGRVGAT | AAVYSAAILE | YLTA | EVLELA | GNASKDLKVK |
| 81 | RITPRHLQLA | IRGDEELDSL | IKATIAGGGV   | IPHIHKS   | LIG | KKGQQKTA |          |            |      |        |            |

Supporting Peptides:

| Peptide          | Uniq -10lgP | Mass     | Length | ppm | m/z      | z | RT    | Fraction | Scan     | Source File               | Area F1 | Area F2 | Area F3 | Area F4 | Area F5  | A   |
|------------------|-------------|----------|--------|-----|----------|---|-------|----------|----------|---------------------------|---------|---------|---------|---------|----------|-----|
| R.AGLQFPVGR.I Y  | 47.54       | 943.5239 | 9      | 0.3 | 472.7694 | 2 | 42.70 | 5        | F5:12209 | 17112021_RID_2349_DP5.raw |         |         |         | 4.76E4  | 5.9883E4 | 9.1 |
| total 1 peptides |             |          |        |     |          |   |       |          |          |                           |         |         |         |         |          |     |

JAI13025.1  
[back to list](#)

[Protein Coverage](#) | [Supporting Peptides](#) |  
Protein Coverage:

|    |            |            |              |           |     |          |          |            |      |        |            |
|----|------------|------------|--------------|-----------|-----|----------|----------|------------|------|--------|------------|
| 1  | MAGGKAGKDS | GKTKTKTVSR | SQRAGLQFPVGR | IIHRHLKSR | T   | T        | SHGRVGAT | AAVYSAAILE | YLTA | EVLELA | GNASKDLKVK |
| 81 | RITPRHLQLA | IRGDEELDSL | IKATIAGGGV   | IPHIHKS   | LIG | KKGQQKTV |          |            |      |        |            |

Supporting Peptides:

| Peptide          | Uniq -10lgP | Mass     | Length | ppm | m/z      | z | RT    | Fraction | Scan     | Source File               | Area F1 | Area F2 | Area F3 | Area F4 | Area F5  | A   |
|------------------|-------------|----------|--------|-----|----------|---|-------|----------|----------|---------------------------|---------|---------|---------|---------|----------|-----|
| R.AGLQFPVGR.I Y  | 47.54       | 943.5239 | 9      | 0.3 | 472.7694 | 2 | 42.70 | 5        | F5:12209 | 17112021_RID_2349_DP5.raw |         |         |         | 4.76E4  | 5.9883E4 | 9.1 |
| total 1 peptides |             |          |        |     |          |   |       |          |          |                           |         |         |         |         |          |     |

AFJ50305.1  
[back to list](#)

[Protein Coverage](#) | [Supporting Peptides](#) |

Protein Coverage:

1 MAGGKAGKDS GKTTKTKTVSR SQRAGLQFPV GR~~I~~IHRHLKSR TTSHGRVGAT AAVYSAAILE YLTAEVLELA GNASKDLKVK

81 RITPRHLQLA IRGDEELDSL IKATIAGGGV IPHIHKSLIG KKGQQKTV

Supporting Peptides:

| Peptide          | Uniq -10lgP | Mass     | Length | ppm | m/z      | z | RT    | Fraction | Scan | Source File                        | Area F1 | Area F2 | Area F3 | Area F4 | Area F5  | A1  |
|------------------|-------------|----------|--------|-----|----------|---|-------|----------|------|------------------------------------|---------|---------|---------|---------|----------|-----|
| R.AGLQFPVGR.I Y  | 47.54       | 943.5239 | 9      | 0.3 | 472.7694 | 2 | 42.70 | 5        |      | F5:12209 17112021_RID_2349_DP5.raw |         |         |         | 4.76E4  | 5.9883E4 | 9.1 |
| total 1 peptides |             |          |        |     |          |   |       |          |      |                                    |         |         |         |         |          |     |

JAG44453.1

[back to list](#)

[Protein Coverage](#) | [Supporting Peptides](#) |

Protein Coverage:

1 MAGGKAGKDS GKAKAKAVSR SQRAGLQFPV GR~~I~~IHRHLKTR TTSHGRVGAT AAVYSAAILE YLTAEVLELA GNASKDLKVK

81 RITPRHLQLA IRGDEELDSL IKATIAGGGV IPHIHKSLIG KKGQQKTA

Supporting Peptides:

| Peptide          | Uniq -10lgP | Mass     | Length | ppm | m/z      | z | RT    | Fraction | Scan | Source File                        | Area F1 | Area F2 | Area F3 | Area F4 | Area F5  | A1  |
|------------------|-------------|----------|--------|-----|----------|---|-------|----------|------|------------------------------------|---------|---------|---------|---------|----------|-----|
| R.AGLQFPVGR.I Y  | 47.54       | 943.5239 | 9      | 0.3 | 472.7694 | 2 | 42.70 | 5        |      | F5:12209 17112021_RID_2349_DP5.raw |         |         |         | 4.76E4  | 5.9883E4 | 9.1 |
| total 1 peptides |             |          |        |     |          |   |       |          |      |                                    |         |         |         |         |          |     |

JAI09933.1

[back to list](#)

[Protein Coverage](#) | [Supporting Peptides](#) |

Protein Coverage:

1 MAGGKAGKDS GKAKAKAVSR SQRAGLQFPV GR~~I~~IHRHLKTR TTSHGRVGAT AAVYSAAILE YLTAEVLELA GNASKDLKVK

81 RITPRHLQLA IRGDEELDSL IKATIAGGGV IPHIHKSLIG KKGQQKTA

Supporting Peptides:

| Peptide          | Uniq -10lgP | Mass     | Length | ppm | m/z      | z | RT    | Fraction | Scan | Source File                        | Area F1 | Area F2 | Area F3 | Area F4 | Area F5  | A1  |
|------------------|-------------|----------|--------|-----|----------|---|-------|----------|------|------------------------------------|---------|---------|---------|---------|----------|-----|
| R.AGLQFPVGR.I Y  | 47.54       | 943.5239 | 9      | 0.3 | 472.7694 | 2 | 42.70 | 5        |      | F5:12209 17112021_RID_2349_DP5.raw |         |         |         | 4.76E4  | 5.9883E4 | 9.1 |
| total 1 peptides |             |          |        |     |          |   |       |          |      |                                    |         |         |         |         |          |     |

JAG46643.1

[back to list](#)

[Protein Coverage](#) | [Supporting Peptides](#) |

Protein Coverage:

1 MAGGKAGKDS GKTTKTKTVSR SQRAGLQFPV GR~~I~~IHRHLKSR TTSHGRVGAT AAVYSAAILE YLTAEVLELA GNASKDLKVK

81 RITPRHLQLA IRGDEELDSL IKATIAGGGV IPHIHKSLIG KKGQQKTV

Supporting Peptides:

| Peptide          | Uniq -10lgP | Mass     | Length | ppm | m/z      | z | RT    | Fraction | Scan | Source File                        | Area F1 | Area F2 | Area F3 | Area F4 | Area F5  | A1  |
|------------------|-------------|----------|--------|-----|----------|---|-------|----------|------|------------------------------------|---------|---------|---------|---------|----------|-----|
| R.AGLQFPVGR.I Y  | 47.54       | 943.5239 | 9      | 0.3 | 472.7694 | 2 | 42.70 | 5        |      | F5:12209 17112021_RID_2349_DP5.raw |         |         |         | 4.76E4  | 5.9883E4 | 9.1 |
| total 1 peptides |             |          |        |     |          |   |       |          |      |                                    |         |         |         |         |          |     |

AFJ50304.1

[back to list](#)

[Protein Coverage](#) | [Supporting Peptides](#) |

Protein Coverage:

1 MAGGKAGKDS GKAKAKAVSR SQRAGLQFPV GR~~I~~IHRHLKTR TTSHGRVGAT AAVYSAAILE YLTAEVLELA GNASKDLKVK

81 RITPRHLQLA IRGDEELDSL IKATIAGGGV IPHIHKSLIG KKGQQKTA

Supporting Peptides:

| Peptide          | Uniq -10lgP | Mass     | Length | ppm | m/z      | z | RT    | Fraction | Scan | Source File                        | Area F1 | Area F2 | Area F3 | Area F4 | Area F5  | A1  |
|------------------|-------------|----------|--------|-----|----------|---|-------|----------|------|------------------------------------|---------|---------|---------|---------|----------|-----|
| R.AGLQFPVGR.I Y  | 47.54       | 943.5239 | 9      | 0.3 | 472.7694 | 2 | 42.70 | 5        |      | F5:12209 17112021_RID_2349_DP5.raw |         |         |         | 4.76E4  | 5.9883E4 | 9.1 |
| total 1 peptides |             |          |        |     |          |   |       |          |      |                                    |         |         |         |         |          |     |

JAG67733.1

[back to list](#)

[Protein Coverage](#) | [Supporting Peptides](#) |

Protein Coverage:

1 MAGGKAGKDS GKAKAKAVSR SQRAGLQFPV GR~~I~~IHRHLKTR TTSHGRVGAT AAVYSAAILE YLTAEVLELA GNASKDLKVK

81 RITPRHLQLA IRGDEELDSL IKATIAGGGV IPHIHKSLIG KKGQQKTA

Supporting Peptides:

| Peptide | Uniq -10lgP | Mass | Length | ppm | m/z | z | RT | Fraction | Scan | Source File | Area F1 | Area F2 | Area F3 | Area F4 | Area F5 | A1 |
|---------|-------------|------|--------|-----|-----|---|----|----------|------|-------------|---------|---------|---------|---------|---------|----|
|---------|-------------|------|--------|-----|-----|---|----|----------|------|-------------|---------|---------|---------|---------|---------|----|

| Peptide          | Uniq -10lgP | Mass     | Length | ppm | m/z      | z | RT    | Fraction | Scan | Source File                        | Area F1 | Area F2 | Area F3 | Area F4 | Area F5  | Area F6 |
|------------------|-------------|----------|--------|-----|----------|---|-------|----------|------|------------------------------------|---------|---------|---------|---------|----------|---------|
| R.AGLQFPVGR.I Y  | 47.54       | 943.5239 | 9      | 0.3 | 472.7694 | 2 | 42.70 | 5        |      | F5:12209 17112021_RID_2349_DP5.raw |         |         |         | 4.76E4  | 5.9883E4 | 9.1     |
| total 1 peptides |             |          |        |     |          |   |       |          |      |                                    |         |         |         |         |          |         |

JAB54108.1  
[back to list](#)

[Protein Coverage](#) | [Supporting Peptides](#) |  
Protein Coverage:

|    |            |            |            |            |           |            |            |            |            |  |  |  |  |  |  |  |
|----|------------|------------|------------|------------|-----------|------------|------------|------------|------------|--|--|--|--|--|--|--|
| 1  | MAGGKAGKDS | GKAKAKAVSR | SQR        | AGLQFPV GR | IIHRHLKTR | TTSHGRVGAT | AAVYSAAILE | YLTAEVLELA | GNASKDLKVK |  |  |  |  |  |  |  |
| 81 | RITPRHLQLA | IRGDEELDSL | IKATIAGGGV | IPHIHKSLIG | KKGQQKTA  |            |            |            |            |  |  |  |  |  |  |  |

Supporting Peptides:

| Peptide          | Uniq -10lgP | Mass     | Length | ppm | m/z      | z | RT    | Fraction | Scan | Source File                        | Area F1 | Area F2 | Area F3 | Area F4 | Area F5  | Area F6 |
|------------------|-------------|----------|--------|-----|----------|---|-------|----------|------|------------------------------------|---------|---------|---------|---------|----------|---------|
| R.AGLQFPVGR.I Y  | 47.54       | 943.5239 | 9      | 0.3 | 472.7694 | 2 | 42.70 | 5        |      | F5:12209 17112021_RID_2349_DP5.raw |         |         |         | 4.76E4  | 5.9883E4 | 9.1     |
| total 1 peptides |             |          |        |     |          |   |       |          |      |                                    |         |         |         |         |          |         |

JAC95409.1  
[back to list](#)

[Protein Coverage](#) | [Supporting Peptides](#) |  
Protein Coverage:

|    |            |            |            |            |           |            |            |            |            |  |  |  |  |  |  |  |
|----|------------|------------|------------|------------|-----------|------------|------------|------------|------------|--|--|--|--|--|--|--|
| 1  | MAGGKAGKDS | GKAKAKAVSR | SQR        | AGLQFPV GR | IIHRHLKTR | TTSHGRVGAT | AAVYSAAILE | YLTAEVLELA | GNASKDLKVK |  |  |  |  |  |  |  |
| 81 | RITPRHLQLA | IRGDEELDSL | IKATIAGGGV | IPHIHKSLIG | KKGQQKTA  |            |            |            |            |  |  |  |  |  |  |  |

Supporting Peptides:

| Peptide          | Uniq -10lgP | Mass     | Length | ppm | m/z      | z | RT    | Fraction | Scan | Source File                        | Area F1 | Area F2 | Area F3 | Area F4 | Area F5  | Area F6 |
|------------------|-------------|----------|--------|-----|----------|---|-------|----------|------|------------------------------------|---------|---------|---------|---------|----------|---------|
| R.AGLQFPVGR.I Y  | 47.54       | 943.5239 | 9      | 0.3 | 472.7694 | 2 | 42.70 | 5        |      | F5:12209 17112021_RID_2349_DP5.raw |         |         |         | 4.76E4  | 5.9883E4 | 9.1     |
| total 1 peptides |             |          |        |     |          |   |       |          |      |                                    |         |         |         |         |          |         |

JAI13026.1  
[back to list](#)

[Protein Coverage](#) | [Supporting Peptides](#) |  
Protein Coverage:

|    |            |            |            |            |           |            |            |            |            |  |  |  |  |  |  |  |
|----|------------|------------|------------|------------|-----------|------------|------------|------------|------------|--|--|--|--|--|--|--|
| 1  | MAGGKAGKDS | GKAKAKAVSR | SQR        | AGLQFPV GR | IIHRHLKTR | TTSHGRVGAT | AAVYSAAILE | YLTAEVLELA | GNASKDLKVK |  |  |  |  |  |  |  |
| 81 | RITPRHLQLA | IRGDEELDSL | IKATIAGGGV | IPHIHKSLIG | KKGQQKTA  |            |            |            |            |  |  |  |  |  |  |  |

Supporting Peptides:

| Peptide          | Uniq -10lgP | Mass     | Length | ppm | m/z      | z | RT    | Fraction | Scan | Source File                        | Area F1 | Area F2 | Area F3 | Area F4 | Area F5  | Area F6 |
|------------------|-------------|----------|--------|-----|----------|---|-------|----------|------|------------------------------------|---------|---------|---------|---------|----------|---------|
| R.AGLQFPVGR.I Y  | 47.54       | 943.5239 | 9      | 0.3 | 472.7694 | 2 | 42.70 | 5        |      | F5:12209 17112021_RID_2349_DP5.raw |         |         |         | 4.76E4  | 5.9883E4 | 9.1     |
| total 1 peptides |             |          |        |     |          |   |       |          |      |                                    |         |         |         |         |          |         |

JAA96854.1  
[back to list](#)

[Protein Coverage](#) | [Supporting Peptides](#) |  
Protein Coverage:

|    |            |            |            |            |           |            |            |            |            |  |  |  |  |  |  |  |
|----|------------|------------|------------|------------|-----------|------------|------------|------------|------------|--|--|--|--|--|--|--|
| 1  | MAGGKAGKDS | GKTKTKTVSR | SQR        | AGLQFPV GR | IIHRHLKSR | TTSHGRVGAT | AAVYSAAILE | YLTAEVLELA | GNASKDLKVK |  |  |  |  |  |  |  |
| 81 | RITPRHLQLA | IRGDEELDSL | IKATIAGGGV | IPHIHKSLIG | KKGQQKTV  |            |            |            |            |  |  |  |  |  |  |  |

Supporting Peptides:

| Peptide          | Uniq -10lgP | Mass     | Length | ppm | m/z      | z | RT    | Fraction | Scan | Source File                        | Area F1 | Area F2 | Area F3 | Area F4 | Area F5  | Area F6 |
|------------------|-------------|----------|--------|-----|----------|---|-------|----------|------|------------------------------------|---------|---------|---------|---------|----------|---------|
| R.AGLQFPVGR.I Y  | 47.54       | 943.5239 | 9      | 0.3 | 472.7694 | 2 | 42.70 | 5        |      | F5:12209 17112021_RID_2349_DP5.raw |         |         |         | 4.76E4  | 5.9883E4 | 9.1     |
| total 1 peptides |             |          |        |     |          |   |       |          |      |                                    |         |         |         |         |          |         |

JAG44452.1  
[back to list](#)

[Protein Coverage](#) | [Supporting Peptides](#) |  
Protein Coverage:

|    |            |            |            |            |           |            |            |            |            |  |  |  |  |  |  |  |
|----|------------|------------|------------|------------|-----------|------------|------------|------------|------------|--|--|--|--|--|--|--|
| 1  | MAGGKAGKDS | GKTKTKTVSR | SQR        | AGLQFPV GR | IIHRHLKSR | TTSHGRVGAT | AAVYSAAILE | YLTAEVLELA | GNASKDLKVK |  |  |  |  |  |  |  |
| 81 | RITPRHLQLA | IRGDEELDSL | IKATIAGGGV | IPHIHKSLIG | KKGQQKTV  |            |            |            |            |  |  |  |  |  |  |  |

Supporting Peptides:

| Peptide          | Uniq -10lgP | Mass     | Length | ppm | m/z      | z | RT    | Fraction | Scan | Source File                        | Area F1 | Area F2 | Area F3 | Area F4 | Area F5  | Area F6 |
|------------------|-------------|----------|--------|-----|----------|---|-------|----------|------|------------------------------------|---------|---------|---------|---------|----------|---------|
| R.AGLQFPVGR.I Y  | 47.54       | 943.5239 | 9      | 0.3 | 472.7694 | 2 | 42.70 | 5        |      | F5:12209 17112021_RID_2349_DP5.raw |         |         |         | 4.76E4  | 5.9883E4 | 9.1     |
| total 1 peptides |             |          |        |     |          |   |       |          |      |                                    |         |         |         |         |          |         |

JAA96855.1  
[back to list](#)

[Protein Coverage](#) | [Supporting Peptides](#) |

Protein Coverage:

|    |            |            |            |                |      |          |            |            |            |            |
|----|------------|------------|------------|----------------|------|----------|------------|------------|------------|------------|
| 1  | MAGGKAGKDS | GKAKAKAVSR | SQR        | <b>AGLQFPV</b> | GR   | IHRHLKTR | TTSHGRVGAT | AAVYSAAILE | YLTAEVLELA | GNASKDLKVK |
| 81 | RITPRHLQLA | IRGDEELDSL | IKATIAGGGV | IPHIHKS        | SLIG | KKGQQKTA |            |            |            |            |

Supporting Peptides:

| Peptide          | Uniq  | -10lgP | Mass     | Length | ppm | m/z      | z | RT    | Fraction | Scan | Source File                        | Area F1 | Area F2 | Area F3 | Area F4 | Area F5  | A1  |
|------------------|-------|--------|----------|--------|-----|----------|---|-------|----------|------|------------------------------------|---------|---------|---------|---------|----------|-----|
| R.AGLQFPVGR.I Y  | 47.54 |        | 943.5239 | 9      | 0.3 | 472.7694 | 2 | 42.70 | 5        |      | F5:12209 17112021_RID_2349_DP5.raw |         |         |         | 4.76E4  | 5.9883E4 | 9.1 |
| total 1 peptides |       |        |          |        |     |          |   |       |          |      |                                    |         |         |         |         |          |     |

XP\_013930707.1

[back to list](#)

[Protein Coverage](#) | [Supporting Peptides](#) |

Protein Coverage:

|    |            |            |            |                |      |          |            |            |            |            |
|----|------------|------------|------------|----------------|------|----------|------------|------------|------------|------------|
| 1  | MAGGKAGKDS | GKTKTKTVSR | SQR        | <b>AGLQFPV</b> | GR   | IHRHLKSR | TTSHGRVGAT | AAVYSAAILE | YLTAEVLELA | GNASKDLKVK |
| 81 | RITPRHLQLA | IRGDEELDSL | IKATIAGGGV | IPHIHKS        | SLIG | KKGQQKTV |            |            |            |            |

Supporting Peptides:

| Peptide          | Uniq  | -10lgP | Mass     | Length | ppm | m/z      | z | RT    | Fraction | Scan | Source File                        | Area F1 | Area F2 | Area F3 | Area F4 | Area F5  | A1  |
|------------------|-------|--------|----------|--------|-----|----------|---|-------|----------|------|------------------------------------|---------|---------|---------|---------|----------|-----|
| R.AGLQFPVGR.I Y  | 47.54 |        | 943.5239 | 9      | 0.3 | 472.7694 | 2 | 42.70 | 5        |      | F5:12209 17112021_RID_2349_DP5.raw |         |         |         | 4.76E4  | 5.9883E4 | 9.1 |
| total 1 peptides |       |        |          |        |     |          |   |       |          |      |                                    |         |         |         |         |          |     |

XP\_013931116.1

[back to list](#)

[Protein Coverage](#) | [Supporting Peptides](#) |

Protein Coverage:

|    |            |            |            |                  |           |           |   |   |     |        |     |       |     |            |            |
|----|------------|------------|------------|------------------|-----------|-----------|---|---|-----|--------|-----|-------|-----|------------|------------|
| 1  | MSGRGKQGGK | ARAKAKSRSS | R          | <b>AGLQFPVGR</b> |           | VHRLLRKGN | Y | A | ERV | GAGAPV | YLA | AAVLE | YLT | AEILELAGNA | ARDNKKTRII |
| 81 | PRHLQLAIRN | DEELNKLLGK | VTIAQGGVLP | NIQAVLLPKK       | TESHKAKGK |           |   |   |     |        |     |       |     |            |            |

Supporting Peptides:

| Peptide          | Uniq  | -10lgP | Mass     | Length | ppm | m/z      | z | RT    | Fraction | Scan | Source File                        | Area F1 | Area F2 | Area F3 | Area F4 | Area F5  | A  |
|------------------|-------|--------|----------|--------|-----|----------|---|-------|----------|------|------------------------------------|---------|---------|---------|---------|----------|----|
| R.AGLQFPVGR.V Y  | 47.54 |        | 943.5239 | 9      | 0.3 | 472.7694 | 2 | 42.70 | 5        |      | F5:12209 17112021_RID_2349_DP5.raw |         |         |         | 4.76E4  | 5.9883E4 | 9. |
| total 1 peptides |       |        |          |        |     |          |   |       |          |      |                                    |         |         |         |         |          |    |

XP\_013908942.1

[back to list](#)

[Protein Coverage](#) | [Supporting Peptides](#) |

Protein Coverage:

|    |            |            |            |                  |           |           |   |   |     |        |     |       |     |            |            |
|----|------------|------------|------------|------------------|-----------|-----------|---|---|-----|--------|-----|-------|-----|------------|------------|
| 1  | MSGRGKQGGK | TRAKAKTRSS | R          | <b>AGLQFPVGR</b> |           | VHRLLRKGN | Y | A | ERV | GAGAPV | YLA | AAVLE | YLT | AEILELAGNA | ARDNKKTRII |
| 81 | PRHLQLAIRN | DEELNKLLGR | VTIAQGGVLP | NIQAVLLPKK       | TESHKAKAK |           |   |   |     |        |     |       |     |            |            |

Supporting Peptides:

| Peptide          | Uniq  | -10lgP | Mass     | Length | ppm | m/z      | z | RT    | Fraction | Scan | Source File                        | Area F1 | Area F2 | Area F3 | Area F4 | Area F5  | A  |
|------------------|-------|--------|----------|--------|-----|----------|---|-------|----------|------|------------------------------------|---------|---------|---------|---------|----------|----|
| R.AGLQFPVGR.V Y  | 47.54 |        | 943.5239 | 9      | 0.3 | 472.7694 | 2 | 42.70 | 5        |      | F5:12209 17112021_RID_2349_DP5.raw |         |         |         | 4.76E4  | 5.9883E4 | 9. |
| total 1 peptides |       |        |          |        |     |          |   |       |          |      |                                    |         |         |         |         |          |    |

XP\_013911300.1

[back to list](#)

[Protein Coverage](#) | [Supporting Peptides](#) |

Protein Coverage:

|    |            |            |            |                 |            |            |     |   |     |       |     |       |     |           |            |
|----|------------|------------|------------|-----------------|------------|------------|-----|---|-----|-------|-----|-------|-----|-----------|------------|
| 1  | MSGRGKVGGG | KTRSKAKSRS | S          | <b>AGLQFPVG</b> | R          | VHRLLRGR   | Y   | A | ERV | GAGAP | YLA | AAVLE | YLT | AEILELAGN | AARDNRKTRI |
| 81 | VPRHVQLAVR | NDEELSRLLG | RVTIAQGGVL | PNIPAALLPR      | KAAAQGGGAA | GRKKGALQAS | QEY |   |     |       |     |       |     |           |            |

Supporting Peptides:

| Peptide          | Uniq  | -10lgP | Mass     | Length | ppm | m/z      | z | RT    | Fraction | Scan | Source File                        | Area F1 | Area F2 | Area F3 | Area F4 | Area F5  | A  |
|------------------|-------|--------|----------|--------|-----|----------|---|-------|----------|------|------------------------------------|---------|---------|---------|---------|----------|----|
| R.AGLQFPVGR.V Y  | 47.54 |        | 943.5239 | 9      | 0.3 | 472.7694 | 2 | 42.70 | 5        |      | F5:12209 17112021_RID_2349_DP5.raw |         |         |         | 4.76E4  | 5.9883E4 | 9. |
| total 1 peptides |       |        |          |        |     |          |   |       |          |      |                                    |         |         |         |         |          |    |

ETE60792.1

[back to list](#)

[Protein Coverage](#) | [Supporting Peptides](#) |

Protein Coverage:

|    |            |            |                  |            |            |            |            |        |       |     |            |            |
|----|------------|------------|------------------|------------|------------|------------|------------|--------|-------|-----|------------|------------|
| 1  | MSGRGKTGGK | ARAKAKSRSS | <b>AGLQFPVGR</b> | VHRLLRKGN  | Y          | A          | ERIGGGAPV  | YLA    | AAVLE | YLS | AEILELAGNA | ARDNKKSRII |
| 81 | PRHLQLAVRN | DEELNKLLGG | VTIAQGGVLP       | NIHAVLLPKK | TEILHSASSS | KPTTSVSKST | KVPKVAVKPT | TAPVSV |       |     |            |            |

Supporting Peptides:

Supporting Peptides:

| Peptide | Uniq | -10lgP | Mass | Length | ppm | m/z | z | RT | Fraction | Scan | Source File | Area F1 | Area F2 | Area F3 | Area F4 | Area F5 | A |
|---------|------|--------|------|--------|-----|-----|---|----|----------|------|-------------|---------|---------|---------|---------|---------|---|
|---------|------|--------|------|--------|-----|-----|---|----|----------|------|-------------|---------|---------|---------|---------|---------|---|

| Peptide                                                                | Uniq -10lgP | Mass       | Length     | ppm        | m/z        | z          | RT               | Fraction   | Scan       | Source File               | Area F1 | Area F2 | Area F3 | Area F4 | Area F5  | A   |
|------------------------------------------------------------------------|-------------|------------|------------|------------|------------|------------|------------------|------------|------------|---------------------------|---------|---------|---------|---------|----------|-----|
| R.AGLQFPVGR.V Y                                                        | 47.54       | 943.5239   | 9          | 0.3        | 472.7694   | 2          | 42.70            | 5          | F5:12209   | 17112021_RID_2349_DP5.raw |         |         |         | 4.76E4  | 5.9883E4 | 9.  |
| total 1 peptides                                                       |             |            |            |            |            |            |                  |            |            |                           |         |         |         |         |          |     |
| XP_013924759.1                                                         |             |            |            |            |            |            |                  |            |            |                           |         |         |         |         |          |     |
| <a href="#">back to list</a>                                           |             |            |            |            |            |            |                  |            |            |                           |         |         |         |         |          |     |
| <a href="#">Protein Coverage</a>   <a href="#">Supporting Peptides</a> |             |            |            |            |            |            |                  |            |            |                           |         |         |         |         |          |     |
| Protein Coverage:                                                      |             |            |            |            |            |            |                  |            |            |                           |         |         |         |         |          |     |
| 1                                                                      | MSGRGKTGGK  | ARAKAKSRSS | RAGLQFPVGR | VHRLLRKGN  | Y          | AERIGGGAPV | YLA              | AVLEYLS    | AEILELAGNA | ARDNKKSRII                |         |         |         |         |          |     |
| 81                                                                     | PRHLQLAVRN  | DEELNKLLGG | VTIAQGGVLP | NIHAVLLPKK | TEILHSASSS | KPTTSVSKSA | KVPKVAVKPT       | TAPVAVQ    |            |                           |         |         |         |         |          |     |
| Supporting Peptides:                                                   |             |            |            |            |            |            |                  |            |            |                           |         |         |         |         |          |     |
| Peptide                                                                | Uniq -10lgP | Mass       | Length     | ppm        | m/z        | z          | RT               | Fraction   | Scan       | Source File               | Area F1 | Area F2 | Area F3 | Area F4 | Area F5  | A   |
| R.AGLQFPVGR.V Y                                                        | 47.54       | 943.5239   | 9          | 0.3        | 472.7694   | 2          | 42.70            | 5          | F5:12209   | 17112021_RID_2349_DP5.raw |         |         |         | 4.76E4  | 5.9883E4 | 9.  |
| total 1 peptides                                                       |             |            |            |            |            |            |                  |            |            |                           |         |         |         |         |          |     |
| XP_026542761.1                                                         |             |            |            |            |            |            |                  |            |            |                           |         |         |         |         |          |     |
| <a href="#">back to list</a>                                           |             |            |            |            |            |            |                  |            |            |                           |         |         |         |         |          |     |
| <a href="#">Protein Coverage</a>   <a href="#">Supporting Peptides</a> |             |            |            |            |            |            |                  |            |            |                           |         |         |         |         |          |     |
| Protein Coverage:                                                      |             |            |            |            |            |            |                  |            |            |                           |         |         |         |         |          |     |
| 1                                                                      | MSGRGKTGGK  | ARAKAKSRSS | RAGLQFPVGR | VHRLLRKGN  | Y          | AERIGGGAPV | YLA              | AVLEYLS    | AEILELAGNA | ARDNKKSRII                |         |         |         |         |          |     |
| 81                                                                     | PRHLQLAVRN  | DEELNKLLGG | VTIAQGGVLP | NIHAVLLPKK | TEILHSASSS | KPTTSVSKST | KVPKVAVKPT       | TAPVSVQ    |            |                           |         |         |         |         |          |     |
| Supporting Peptides:                                                   |             |            |            |            |            |            |                  |            |            |                           |         |         |         |         |          |     |
| Peptide                                                                | Uniq -10lgP | Mass       | Length     | ppm        | m/z        | z          | RT               | Fraction   | Scan       | Source File               | Area F1 | Area F2 | Area F3 | Area F4 | Area F5  | A   |
| R.AGLQFPVGR.V Y                                                        | 47.54       | 943.5239   | 9          | 0.3        | 472.7694   | 2          | 42.70            | 5          | F5:12209   | 17112021_RID_2349_DP5.raw |         |         |         | 4.76E4  | 5.9883E4 | 9.  |
| total 1 peptides                                                       |             |            |            |            |            |            |                  |            |            |                           |         |         |         |         |          |     |
| ETE59971.1                                                             |             |            |            |            |            |            |                  |            |            |                           |         |         |         |         |          |     |
| <a href="#">back to list</a>                                           |             |            |            |            |            |            |                  |            |            |                           |         |         |         |         |          |     |
| <a href="#">Protein Coverage</a>   <a href="#">Supporting Peptides</a> |             |            |            |            |            |            |                  |            |            |                           |         |         |         |         |          |     |
| Protein Coverage:                                                      |             |            |            |            |            |            |                  |            |            |                           |         |         |         |         |          |     |
| 1                                                                      | GRGRPGSLLA  | PRRVIVSRLS | QAALARNRDR | TSPRSDANMA | GKGAGKDSGK | AKAKAVSRSQ | RAGLQFPVGR       | IHRHLKTRTT |            |                           |         |         |         |         |          |     |
| 81                                                                     | SHGRVGATAA  | VYSAAILEYL | TAEVLELAGN | ASKDLKVKRI | TPRHLQLAIR | GDEELDSLIK | ATIAGGGVIP       | HIHKSLIGKK |            |                           |         |         |         |         |          |     |
| 161                                                                    | GQQKTA      |            |            |            |            |            |                  |            |            |                           |         |         |         |         |          |     |
| Supporting Peptides:                                                   |             |            |            |            |            |            |                  |            |            |                           |         |         |         |         |          |     |
| Peptide                                                                | Uniq -10lgP | Mass       | Length     | ppm        | m/z        | z          | RT               | Fraction   | Scan       | Source File               | Area F1 | Area F2 | Area F3 | Area F4 | Area F5  | A   |
| R.AGLQFPVGR.I Y                                                        | 47.54       | 943.5239   | 9          | 0.3        | 472.7694   | 2          | 42.70            | 5          | F5:12209   | 17112021_RID_2349_DP5.raw |         |         |         | 4.76E4  | 5.9883E4 | 9.1 |
| total 1 peptides                                                       |             |            |            |            |            |            |                  |            |            |                           |         |         |         |         |          |     |
| XP_013921022.1                                                         |             |            |            |            |            |            |                  |            |            |                           |         |         |         |         |          |     |
| <a href="#">back to list</a>                                           |             |            |            |            |            |            |                  |            |            |                           |         |         |         |         |          |     |
| <a href="#">Protein Coverage</a>   <a href="#">Supporting Peptides</a> |             |            |            |            |            |            |                  |            |            |                           |         |         |         |         |          |     |
| Protein Coverage:                                                      |             |            |            |            |            |            |                  |            |            |                           |         |         |         |         |          |     |
| 1                                                                      | MLFHLTILFK  | KFHISPYFFC | PNYSTMTGRN | RDRTSPRSDA | NMAGGKAGKD | SGKAKAKAVS | RSQRAGLQFPVGR    | IHRHLKT    |            |                           |         |         |         |         |          |     |
| 81                                                                     | RTTSHGRVGA  | TAAVYSAAIL | EYLTAEVLEL | AGNASKDLKV | KRITPRHLQL | AIRGDEELDS | LIKATIAGGG       | VIPHIKSLI  |            |                           |         |         |         |         |          |     |
| 161                                                                    | GKKGQQKTA   |            |            |            |            |            |                  |            |            |                           |         |         |         |         |          |     |
| Supporting Peptides:                                                   |             |            |            |            |            |            |                  |            |            |                           |         |         |         |         |          |     |
| Peptide                                                                | Uniq -10lgP | Mass       | Length     | ppm        | m/z        | z          | RT               | Fraction   | Scan       | Source File               | Area F1 | Area F2 | Area F3 | Area F4 | Area F5  | A   |
| R.AGLQFPVGR.I Y                                                        | 47.54       | 943.5239   | 9          | 0.3        | 472.7694   | 2          | 42.70            | 5          | F5:12209   | 17112021_RID_2349_DP5.raw |         |         |         | 4.76E4  | 5.9883E4 | 9.1 |
| total 1 peptides                                                       |             |            |            |            |            |            |                  |            |            |                           |         |         |         |         |          |     |
| LAB40587.1                                                             |             |            |            |            |            |            |                  |            |            |                           |         |         |         |         |          |     |
| <a href="#">back to list</a>                                           |             |            |            |            |            |            |                  |            |            |                           |         |         |         |         |          |     |
| <a href="#">Protein Coverage</a>   <a href="#">Supporting Peptides</a> |             |            |            |            |            |            |                  |            |            |                           |         |         |         |         |          |     |
| Protein Coverage:                                                      |             |            |            |            |            |            |                  |            |            |                           |         |         |         |         |          |     |
| 1                                                                      | MPDVSLEERL  | PSILSTHSGA | GGKYKSRSSW | QHGLQFQVVS | RWLRIRMSGR | GKQDSKARAK | AKTRSSRAGLQFPVGR | VHRL       |            |                           |         |         |         |         |          |     |
| 81                                                                     | LRRGHYAERV  | GAGAPVYLAA | VLEYLTAEIL | ELAGNAARDN | RKTRIVPRHV | QLAVRNDEEL | SRLGRVTIA        | QGGVLPNIPA |            |                           |         |         |         |         |          |     |
| 161                                                                    | ALLPRKAAAA  | GGGTAGRQKG | THQASQEN   |            |            |            |                  |            |            |                           |         |         |         |         |          |     |
| Supporting Peptides:                                                   |             |            |            |            |            |            |                  |            |            |                           |         |         |         |         |          |     |
| Peptide                                                                | Uniq -10lgP | Mass       | Length     | ppm        | m/z        | z          | RT               | Fraction   | Scan       | Source File               | Area F1 | Area F2 | Area F3 | Area F4 | Area F5  | A   |
| total 1 peptides                                                       |             |            |            |            |            |            |                  |            |            |                           |         |         |         |         |          |     |

| Peptide          | Uniq -10lgP | Mass     | Length | ppm | m/z      | z | RT    | Fraction | Scan     | Source File               | Area F1 | Area F2 | Area F3 | Area F4 | Area F5  | A  |
|------------------|-------------|----------|--------|-----|----------|---|-------|----------|----------|---------------------------|---------|---------|---------|---------|----------|----|
| R.AGLQFPVGR.V Y  | 47.54       | 943.5239 | 9      | 0.3 | 472.7694 | 2 | 42.70 | 5        | F5:12209 | 17112021_RID_2349_DP5.raw |         |         |         | 4.76E4  | 5.9883E4 | 9. |
| total 1 peptides |             |          |        |     |          |   |       |          |          |                           |         |         |         |         |          |    |

TRINITY\_DN1911  
[back to list](#)

| [Protein Coverage](#) | [Supporting Peptides](#) |  
Protein Coverage:

1 **VAQLASGFIQ K**PGIYVWIGL RDRRKEQVVL NFMTTTESRI SVAK

Supporting Peptides:

| Peptide          | Uniq -10lgP | Mass      | Length | ppm | m/z      | z | RT    | Fraction | Scan     | Source File               | Area F1 | Area F2 | Area F3 | Area F4 | Area F5  | Ar F |
|------------------|-------------|-----------|--------|-----|----------|---|-------|----------|----------|---------------------------|---------|---------|---------|---------|----------|------|
| VAQLASGFIQK.P Y  | 46.25       | 1160.6553 | 11     | 0.8 | 581.3354 | 2 | 40.26 | 5        | F5:11370 | 17112021_RID_2349_DP5.raw |         |         |         |         | 2.6109E5 |      |
| total 1 peptides |             |           |        |     |          |   |       |          |          |                           |         |         |         |         |          |      |

TRINITY\_DN1911  
[back to list](#)

| [Protein Coverage](#) | [Supporting Peptides](#) |  
Protein Coverage:

1 **VAQLASGFIQ K**PGIYVWIGL RDRRKEQVVL NFMTTTESRI SVAK

Supporting Peptides:

| Peptide          | Uniq -10lgP | Mass      | Length | ppm | m/z      | z | RT    | Fraction | Scan     | Source File               | Area F1 | Area F2 | Area F3 | Area F4 | Area F5  | Ar F |
|------------------|-------------|-----------|--------|-----|----------|---|-------|----------|----------|---------------------------|---------|---------|---------|---------|----------|------|
| VAQLASGFIQK.P Y  | 46.25       | 1160.6553 | 11     | 0.8 | 581.3354 | 2 | 40.26 | 5        | F5:11370 | 17112021_RID_2349_DP5.raw |         |         |         |         | 2.6109E5 |      |
| total 1 peptides |             |           |        |     |          |   |       |          |          |                           |         |         |         |         |          |      |

XP\_026548138.1  
[back to list](#)

| [Protein Coverage](#) | [Supporting Peptides](#) |  
Protein Coverage:

1 MAQLDQLSPY VKKVDRSAQA DPPQQASSTP VEKWPDIPI ERLQRSLSLN LGEGTSSATE PVAARTRAKT EQASLVAPLR  
81 QVDQLAINPK KPSESVTLSL FQHVPFTSSD LLNWKLHYGP FSEKPMEVAD LVKTIMDAHN PNWLDVQQLM GTLFSPPEERE  
161 KIKNAISEIL KPDVTLYHSL TDLMDEKYP S NPDPWDLYTD EGKTRLRDYQ SLVVRAIRLA GKPVINMSKP ALVLQEPTES  
241 PEAIFYTRLVE SYRMYTPIDP SAPENARMMT MAFISQSALD IRRKLQRLEG ALGKPMSELM EVARKVFANR DKEEDKKKDH  
321 KMQRKAELLA AAIAWPSRGR VNPLRGMGPG PQRGRGNSLQ RGVSWDLGPN QCAFCCKQQH WKGECPERNR RGRSGDRGDS  
401 PRNLTFAVEE EWDXGRPGSE SLPEPMVSLK VGGKPVTFVL DTGATRSVLT QPMAQASRQT INIQGATGNT LQRPFFLEPLE  
481 CTVKGQAITH QFVYMPDCPV PLLGRDLLCK LRAQISFAED GSMHLGYGKL GFSIPIEESW RLMVARTTGQ ETEETWRQFE  
561 VPYLWAEDNP PGFAAHHPPI LVEEVPTKPP VRIRQRAYPR HVMQAIQDII DIYLQHHILV PTESPWNTQI LPIPKGDGRF  
641 RVPQDLRPVN LATVTIHPVV PNPYVILGLI PQAAQWFSVI DLKDAFFTIA IHELSQLHFA FEWENPATGR KQQYTWTRLP  
721 QGFKNSPTLF GTALAKDLEN LHIPAPDLVL QYVDDLLVTG LTEDRCWENT KDLLSLLQTL GYKASRNAQ LVLQKVRYLG  
801 YDIERGKRTL GHERKEAICQ LPRPINKKDL RGFLGAAGFC RIWIPKFSLI AKPLYEATKG ANRDPLHWGP EEEASFALK  
881 QALLQAPSLG LPDLDKPFQL FVDTKKEVAV GVLTQTIGSW HRPVAYLSKQ LDNVAKGWA CLKAVAGTAL LTQEANKLTF  
961 GQQLDIFTPH ALKSVLDMKG HLWLTNPRML KYQGLLTHNP MITLTQSTLL NPATLLPEPD MGVVHDCIHT IEETYASRPD  
1041 MRDTPLPAPD YSLFTDGTSTF LQEGMRKAGY AVVTLDEVWE AKPLPPGTS QLAELHALTR ALELAKGLAV NIYTD SKYAF  
1121 LTVQVHGALY KERGLITAGG KDIK**YGP**HIL RLLDSVWSPS KVAVMHCRGH QKVVTDIHRG NERADKFARK AAMLEFIPEE  
1201 RNLAVWLPDD NPKPHYSSD RDRDLDALEAH PDGHWVLPD NRVAEIKSWI HWSRVKLAAP TSWKVETCPD SLKLVILKRA  
1281 KKDISPGGDT PEAVPLPTGD EEDLPSPSGD TPEAVPQPTG GVERQTPAGV TPDADAHRTG LPWRLRSSAK RQ

Supporting Peptides:

| Peptide          | Uniq -10lgP | Mass     | Length | ppm | m/z      | z | RT    | Fraction | Scan    | Source File               | Area F1 | Area F2 | Area F3 | Area F4 | Area F5 | Area F6 | Area F  |
|------------------|-------------|----------|--------|-----|----------|---|-------|----------|---------|---------------------------|---------|---------|---------|---------|---------|---------|---------|
| K.YGPILRL.Y      | 45.78       | 854.4763 | 7      | 1.0 | 428.2458 | 2 | 29.13 | 7        | F7:7565 | 17112021_RID_2349_DP7.raw |         |         |         |         |         |         | 1.3984E |
| total 1 peptides |             |          |        |     |          |   |       |          |         |                           |         |         |         |         |         |         |         |

XP\_032092456.1  
[back to list](#)

| [Protein Coverage](#) | [Supporting Peptides](#) |  
Protein Coverage:

1 MILWLNVLVS LVSLGGVRS VQLVESGGDV RRPGESLRSL CQASGFTFSS YYMNWVRQAP GKGLEWVASI SESSGTYTTY  
81 SDKVKGRFTI SRDNAKSQLY LQMNNLKEED TAVYYCARGT VRGSLSEEF LKLLFLGIQS **EVQLVESGGG VR**RPGESLRL  
161 SCQSGSGFTFS CYMNWVRQA PGKRPEWVVY ISISSSNIYY SDKVKGRFTI SRDDSNLLY LQMKNLKPED TAVYYCARDA  
241 Q

Supporting Peptides:

| Peptide | Uniq -10lgP | Mass | Length | ppm | m/z | z | RT | Fraction | Scan | Source File | Area F1 | Area F2 | Area F3 | Area F4 | Area F5 | Area F6 | Area F |
|---------|-------------|------|--------|-----|-----|---|----|----------|------|-------------|---------|---------|---------|---------|---------|---------|--------|
|---------|-------------|------|--------|-----|-----|---|----|----------|------|-------------|---------|---------|---------|---------|---------|---------|--------|

| Peptide           | Uniq -10lgP | Mass      | Length | ppm  | m/z      | z | RT    | Fraction | Scan    | Source File               | Area F1 | Area F2 | Area F3 | Area F4 | Area F5 | Area F6 |
|-------------------|-------------|-----------|--------|------|----------|---|-------|----------|---------|---------------------------|---------|---------|---------|---------|---------|---------|
| S.EVQLVESGGGV.R Y | 42.06       | 1228.6411 | 12     | -0.8 | 615.3273 | 2 | 33.46 | 7        | F7:9095 | 17112021_RID_2349_DP7.raw |         |         |         |         |         |         |

total 1 peptides

XP\_007437884.2  
[back to list](#)

[Protein Coverage](#) | [Supporting Peptides](#) |  
Protein Coverage:

|     |            |            |            |            |                |                 |            |            |            |  |  |  |  |  |  |  |
|-----|------------|------------|------------|------------|----------------|-----------------|------------|------------|------------|--|--|--|--|--|--|--|
| 1   | MFCGKLNMHV | NIQTGKWETD | PSGTKSCFGR | KEEILEYCQE | IYPDLRITNV     | VELNEPVCIK      | NWCKKGKKQC | KGHTHIVVPF |            |  |  |  |  |  |  |  |
| 81  | KCLVGEFVSD | VLLVPEKCRF | FHRERMVCK  | SHQYWHIVAK | EACLTGEMIL     | HSYGMLLPCG      | VDKFHGTEYV | CCPQTKIVDE |            |  |  |  |  |  |  |  |
| 161 | ALSKEKEDED | EEDEDEDEDD | GIKSELPTEA | DTDDFTVGVM | EMNEEDEEEQ     | EENEEEVVVD      | QDYYYDSYKD | YNEELPSEPS |            |  |  |  |  |  |  |  |
| 241 | NGRSFSQKEI | ISDVKAVCSQ | EAMTGPCRAM | MPRWYFDMYK | KKCIRFIYGG     | CGGNRNPFES      | EEYCMVCKK  | MIPPTPLPTD |            |  |  |  |  |  |  |  |
| 321 | DVDVYFETPA | DDNEHARFQK | AKEQLEIRHR | NRMDRVK    | <b>KEW EEA</b> | <b>EA</b> QAKNL | PKTERQALMQ | RFQTMASLE  | KEAASEKQQL |  |  |  |  |  |  |  |
| 401 | VETHLARVEA | MLDDRHRIAL | ENYLVALQTD | PPRPHRILQA | LKRYVRAENK     | DRLHTIHHYQ      | HVLAVDPEKA | AQMKSQVMTH |            |  |  |  |  |  |  |  |
| 481 | LHVIEERMNQ | SLSLLYKVPY | VAEEIQNEID | ELLQEQRDMD | DQFTSSISES     | QVDVHVSSEE      | SEESPLFDGK | PFRPFQVKTF |            |  |  |  |  |  |  |  |
| 561 | PASSKSEGS  | LADLDGLIGA | EEKVINSKN  | LDENVKYPVP | TMPR           |                 |            |            |            |  |  |  |  |  |  |  |

Supporting Peptides:

| Peptide        | Uniq -10lgP | Mass      | Length | ppm | m/z      | z | RT    | Fraction | Scan    | Source File               | Area F1 | Area F2 | Area F3 | Area F4 | Area F5 | Area F6  |
|----------------|-------------|-----------|--------|-----|----------|---|-------|----------|---------|---------------------------|---------|---------|---------|---------|---------|----------|
| K.KEWEEAEK.Q Y | 40.82       | 1047.4873 | 8      | 0.1 | 524.7510 | 2 | 26.98 | 6        | F6:6676 | 17112021_RID_2349_DP6.raw |         |         |         |         |         | 2.3088E5 |

total 1 peptides

XP\_007437883.2  
[back to list](#)

[Protein Coverage](#) | [Supporting Peptides](#) |  
Protein Coverage:

|     |            |            |            |            |                |                 |            |            |            |  |  |  |  |  |  |  |
|-----|------------|------------|------------|------------|----------------|-----------------|------------|------------|------------|--|--|--|--|--|--|--|
| 1   | MFCGKLNMHV | NIQTGKWETD | PSGTKSCFGR | KEEILEYCQE | IYPDLRITNV     | VELNEPVCIK      | NWCKKGKKQC | KGHTHIVVPF |            |  |  |  |  |  |  |  |
| 81  | KCLVGEFVSD | VLLVPEKCRF | FHRERMVCK  | SHQYWHIVAK | EACLTGEMIL     | HSYGMLLPCG      | VDKFHGTEYV | CCPQTKIVDE |            |  |  |  |  |  |  |  |
| 161 | ALSKEKEDED | EEDEDEDEDD | GIKSELPTEA | DTDDFTVGVM | EMNEEDEEEQ     | EENEEEVVVD      | QDYYYDSYKD | YNEELPSEPS |            |  |  |  |  |  |  |  |
| 241 | NGRSFSQKEI | ISDVKAVCSQ | EAMTGPCRAM | MPRWYFDMYK | KKCIRFIYGG     | CGGNRNPFES      | EEYCMVCKK  | MIPPTPLPTD |            |  |  |  |  |  |  |  |
| 321 | DVDVYFETPA | DDNEHARFQK | AKEQLEIRHR | NRMDRVK    | <b>KEW EEA</b> | <b>EA</b> QAKNL | PKTERQALMQ | RFQTMASLE  | KEAASEKQQL |  |  |  |  |  |  |  |
| 401 | VETHLARVEA | MLDDRHRIAL | ENYLVALQTD | PPRPHRILQA | LKRYVRAENK     | DRLHTIHHYQ      | HVLAVDPEKA | AQMKSQVMTH |            |  |  |  |  |  |  |  |
| 481 | LHVIEERMNQ | SLSLLYKVPY | VAEEIQNEID | ELLQEQRDMD | DQFTSSISES     | QVDVHVSSEE      | SEESPLFDGK | PFRPFQVKTF |            |  |  |  |  |  |  |  |
| 561 | PASSKSEDSQ | PDLYHPEKKG | SGLADLDGLI | GAEKVINSK  | NKLDENVKYP     | VPTMPR          |            |            |            |  |  |  |  |  |  |  |

Supporting Peptides:

| Peptide        | Uniq -10lgP | Mass      | Length | ppm | m/z      | z | RT    | Fraction | Scan    | Source File               | Area F1 | Area F2 | Area F3 | Area F4 | Area F5 | Area F6  |
|----------------|-------------|-----------|--------|-----|----------|---|-------|----------|---------|---------------------------|---------|---------|---------|---------|---------|----------|
| K.KEWEEAEK.Q Y | 40.82       | 1047.4873 | 8      | 0.1 | 524.7510 | 2 | 26.98 | 6        | F6:6676 | 17112021_RID_2349_DP6.raw |         |         |         |         |         | 2.3088E5 |

total 1 peptides

XP\_007437886.2  
[back to list](#)

[Protein Coverage](#) | [Supporting Peptides](#) |  
Protein Coverage:

|     |             |             |             |            |             |            |                  |            |  |  |  |  |  |  |  |  |
|-----|-------------|-------------|-------------|------------|-------------|------------|------------------|------------|--|--|--|--|--|--|--|--|
| 1   | MFCGKLNMHV  | NIQTGKWETD  | PSGTKSCFGR  | KEEILEYCQE | IYPDLRITNV  | VELNEPVCIK | NWCKKGKKQC       | KGHTHIVVPF |  |  |  |  |  |  |  |  |
| 81  | KCLVGEFVSD  | VLLVPEKCRF  | FHRERMVCK   | SHQYWHIVAK | EACLTGEMIL  | HSYGMLLPCG | VDKFHGTEYV       | CCPQTKIVDE |  |  |  |  |  |  |  |  |
| 161 | ALSKEKEDED  | EEDEDEDEDD  | GIKSELPTEA  | DTDDFTVGVM | EMNEEDEEEQ  | EENEEEVVVD | QDYYYDSYKD       | YNEELPSEPS |  |  |  |  |  |  |  |  |
| 241 | NGRSFSQKEI  | ISDVKVPPTP  | LPTDDVDVYF  | ETPADDNEHA | RFQKAKEQLE  | IRHRNRMDRV | <b>KKEWEEAEK</b> | AKNLPKTERQ |  |  |  |  |  |  |  |  |
| 321 | ALMQRFQDMA  | KSLEKEAASE  | KQQLVETHLA  | RVEAMLDDRH | RIALENYLVA  | LQTDPPRPHR | ILQALKRYVR       | AENKDRLHTI |  |  |  |  |  |  |  |  |
| 401 | HHYQHVLAVD  | PEKAAQMKSQ  | VMTHLVHVEE  | RMNQSLSLLY | KVPYVAEEIQ  | NEIDELLQEQ | RTDMDQFTSS       | ISESQVDVHV |  |  |  |  |  |  |  |  |
| 481 | SSEESSEESPL | FDGKPFPRPFQ | VKTFFPASSKS | EGSGLADLDG | LIGAEKVINSK | SKNKLDENVK | YPVPTMPR         |            |  |  |  |  |  |  |  |  |

Supporting Peptides:

| Peptide        | Uniq -10lgP | Mass      | Length | ppm | m/z      | z | RT    | Fraction | Scan    | Source File               | Area F1 | Area F2 | Area F3 | Area F4 | Area F5 | Area F6  |
|----------------|-------------|-----------|--------|-----|----------|---|-------|----------|---------|---------------------------|---------|---------|---------|---------|---------|----------|
| K.KEWEEAEK.Q Y | 40.82       | 1047.4873 | 8      | 0.1 | 524.7510 | 2 | 26.98 | 6        | F6:6676 | 17112021_RID_2349_DP6.raw |         |         |         |         |         | 2.3088E5 |

total 1 peptides

XP\_007437885.2  
[back to list](#)

[Protein Coverage](#) | [Supporting Peptides](#) |  
Protein Coverage:

|     |             |             |             |            |             |            |            |            |  |
|-----|-------------|-------------|-------------|------------|-------------|------------|------------|------------|--|
| 1   | MFCGKLNMHV  | NIQTGKWETD  | PSGTKSCFGR  | KEEILEYCQE | IYPDLRITNV  | VELNEPVCIK | NWCKKGKKQC | KGHTHIVVPF |  |
| 81  | KCLVGEFVSD  | VLLVPEKCRF  | FHRERMVVCK  | SHQYWHIVAK | EACLTEGMIL  | HSYGMLLPCG | VDKFGHTEYV | CCPQTKIVDE |  |
| 161 | ALSKEKEDED  | EEEEDEDEDD  | GIKSELPTEA  | DTDDFTVGVM | EMNEEDEEEQ  | EENEEEVVVD | QDYYYDSYKD | YNEELPSEPS |  |
| 241 | NGRSFSQKEI  | ISDVKVPPTP  | LPTDDVDVYF  | ETPADDNEHA | RFQKAKEQLE  | IRHRNRMDRV | KKEWEEAEKQ | AKNLPKTERQ |  |
| 321 | ALMQRFQTMA  | KSLEKEAASE  | KQQLVETHLA  | RVEAMLDDRH | RIALENYLVA  | LQTDPPRPHR | ILQALKRYVR | AENKDLRHTI |  |
| 401 | HHYQHVLAVD  | PEKAAQMKSQ  | VMTHLHVIEE  | RMNQSLSLLY | KVPYVAEEIQ  | NEIDELLQEQ | RTDMDQFTSS | ISESQVDVHV |  |
| 481 | SSEESSEESPL | FDGKPFPRPFQ | VKTFFPASSKS | EDSQPDLYHP | EKKGSGGLADL | DGLIGAEKVK | INSKNKLDEN | VKYPVPTMPR |  |

Supporting Peptides:

| Peptide          | Uniq  | -10lgP    | Mass | Length | ppm      | m/z | z     | RT | Fraction | Scan    | Source File               | Area F1 | Area F2 | Area F3 | Area F4 | Area F5 | Area F6  |
|------------------|-------|-----------|------|--------|----------|-----|-------|----|----------|---------|---------------------------|---------|---------|---------|---------|---------|----------|
| K.KEWEEAEK.Q Y   | 40.82 | 1047.4873 | 8    | 0.1    | 524.7510 | 2   | 26.98 | 6  |          | F6:6676 | 17112021_RID_2349_DP6.raw |         |         |         |         |         | 2.3088E4 |
| total 1 peptides |       |           |      |        |          |     |       |    |          |         |                           |         |         |         |         |         |          |

XP\_007421854.1  
[back to list](#)

[Protein Coverage](#) | [Supporting Peptides](#) |

Protein Coverage:

|     |            |            |            |            |            |            |            |            |                                                                                         |
|-----|------------|------------|------------|------------|------------|------------|------------|------------|-----------------------------------------------------------------------------------------|
| 1   | MQRLRDADSS | MFKPECIYTS | GGGWTEGGGS | ADSQSMFYFA | KLMLLIFCGV | LLGESRKHKR | GRWTEEADVQ | KTSHTYKKNY | 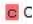     |
| 81  | DMTKAWSGNN | KQLLRVEDHD | FTMRPAFGGP | AIPVGVDVQV | ESLDSISEVN | MDFTMTLYLR | HYWKDERLSF | PSHANKSMTF |                                                                                         |
| 161 | DGRLVKKIWV | PDIFFVHSKR | SFIHDTTDDN | IMLRVFDPGH | VLYSMRITVT | AMCNMDFSRF | PLDSQTCSLE | LESYAYTDED |                                                                                         |
| 241 | LMLYWKNGSE | SLKTDEKISL | SQFLIQKFHT | TSRLAFYSST | GRYNRLYINF | ILRRHIFFFL | LQTYFPATLM | VMLSWVSFWI |                                                                                         |
| 321 | DRRAVPARVS | LGITTVLTMS | TIITGVNASM | PGVSYIKAVD | IYLWVSFVTV | FLSVIEYAAV | NYLTTVQERK | QRKQQEK    | FPC 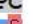 |
| 401 | VSGISSTKRM | TLDGIYNELD | ASSLEGDPRS | QMVAEEDKQE | KMVIHLTMSN | ESNSSKKKGL | KEHVSLRIIQ | NTHAIDKYSR |                                                                                         |
| 481 | LIFPGTYIFF | NIVYWSVFC  |            |            |            |            |            |            |                                                                                         |

Supporting Peptides:

| Peptide                   | Uniq  | -10lgP    | Mass | Length | ppm      | m/z | z     | RT | Fraction | Scan     | Source File               | Area F1 | Area F2 | Area F3 | Area F4  |
|---------------------------|-------|-----------|------|--------|----------|-----|-------|----|----------|----------|---------------------------|---------|---------|---------|----------|
| K.FPC(+57.02)VSGISSTK.R Y | 39.14 | 1181.5751 | 11   | -0.4   | 591.7946 | 2   | 42.28 | 5  |          | F5:12814 | 17112021_RID_2349_DP5.raw |         |         |         | 4.3217E4 |

[Peptide List](#)
