# Supplementary material for: The Middle Eastern Cousin: Comparative Venomics of Daboia palaestinae and Daboia russelii
Source: Toxins (Basel). 2022 Oct 23;14(11):725. doi: 10.3390/toxins14110725 (PMC9696752; doi:10.3390/toxins14110725)
Supplement: Supplementary file 1 [file toxins-14-00725-s001.zip › Supplementary Tables.pdf]

## Supplementary Table

Raw MS/MS spectra of each gel excised bands were searched against the National Center for Biotechnology Information's (NCBI) non-redundant (nr) database (Serpentes: 8570) using Peaks Studio X+ for the identification of toxin classes present in the venom. The key results of these searches, including the accession numbers, species, -10lgP values, coverage, number of high confidence peptides, unique peptides, percent abundance of each toxin hit, average molecular mass (kDa) and the toxin family of the matching NCBI entry was identified are listed here. The percentage indicated adjacent to the average mass column corresponds to its relative proportion in the venom of *D. palaestinae* (**Table S1**).

**Table S1.** The proteomic composition of *D. palaestinae* venom.

| Sr. No.                                            | Accession      | Species                             | -10lgP | Coverage (%) | #Peptides | #Unique | Relative abundance of toxin hit (%) | Avg. Mass (kda) | Toxin Type |
|----------------------------------------------------|----------------|-------------------------------------|--------|--------------|-----------|---------|-------------------------------------|-----------------|------------|
| <b>Snake venom serine protease (SVSP): 41.382%</b> |                |                                     |        |              |           |         |                                     |                 |            |
| 1                                                  | TRINITY_DN441  | <i>D. palaestinae</i> transcriptome | 270.06 | 71           | 24        | 15      | 10.1632                             | 13.35           | SVSP       |
| 2                                                  | TRINITY_DN240  | <i>D. palaestinae</i> transcriptome | 245.05 | 44           | 15        | 5       | 11.9091                             | 15.30           | SVSP       |
| 3                                                  | Q9PT40.1       | <i>Macrovipera lebetina</i>         | 215.17 | 26           | 11        | 5       | 1.5929                              | 28.89           | SVSP       |
| 4                                                  | ADN04916.1     | <i>Macrovipera lebetina</i>         | 186.74 | 21           | 10        | 6       | 0.9888                              | 28.70           | SVSP       |
| 5                                                  | P18964.1       | <i>Daboia siamensis</i>             | 181.11 | 18           | 8         | 7       | 0.0993                              | 26.18           | SVSP       |
| 6                                                  | TRINITY_DN441  | <i>D. palaestinae</i> transcriptome | 172.25 | 35           | 9         | 5       | 9.4037                              | 16.51           | SVSP       |
| 7                                                  | TRINITY_DN240  | <i>D. palaestinae</i> transcriptome | 153.29 | 22           | 4         | 2       | 0.1057                              | 13.90           | SVSP       |
| 8                                                  | TRINITY_DN0    | <i>D. palaestinae</i> transcriptome | 148.09 | 19           | 5         | 2       | 3.7123                              | 19.01           | SVSP       |
| 9                                                  | E5AJX2.1       | <i>Vipera berus nikolskii</i>       | 137.19 | 13           | 5         | 1       | 0.0070                              | 28.21           | SVSP       |
| 10                                                 | AUS82489.1     | <i>Crotalus atrox</i>               | 125.09 | 11           | 4         | 1       | 0.0001                              | 28.08           | SVSP       |
| 11                                                 | ADN04917.1     | <i>Macrovipera lebetina</i>         | 122.9  | 8            | 2         | 1       | 0.6202                              | 28.29           | SVSP       |
| 12                                                 | ADP88559.1     | <i>Daboia siamensis</i>             | 117.89 | 11           | 3         | 1       | 0.0005                              | 28.49           | SVSP       |
| 13                                                 | XP_015666085.1 | <i>Protobothrops mucrosquamatus</i> | 114.12 | 8            | 3         | 3       | 0.0038                              | 54.74           | SVSP       |
| 14                                                 | P86497.1       | <i>Bitis rhinoceros</i>             | 114.04 | 15           | 4         | 1       | 0.1342                              | 9.97            | SVSP       |
| 15                                                 | ADP88560.1     | <i>Daboia siamensis</i>             | 105.88 | 10           | 2         | 1       | 0.0060                              | 28.03           | SVSP       |
| 16                                                 | E0Y421.1       | <i>Macrovipera lebetina</i>         | 103.68 | 8            | 3         | 1       | 0.1653                              | 28.27           | SVSP       |

|                                                               |                 |                                     |        |    |    |    |         |        |        |
|---------------------------------------------------------------|-----------------|-------------------------------------|--------|----|----|----|---------|--------|--------|
| 17                                                            | TRINITY_DN13494 | <i>D. palaestinae</i> transcriptome | 92.73  | 7  | 2  | 2  | 0.0036  | 38.00  | SVSP   |
| 18                                                            | ART88739.1      | <i>Azemiops feae</i>                | 79.86  | 7  | 2  | 1  | 0.0006  | 27.74  | SVSP   |
| 19                                                            | ABB76279.1      | <i>Lachesis stenophrys</i>          | 73.14  | 9  | 1  | 1  | 0.0004  | 27.81  | SVSP   |
| 20                                                            | TRINITY_DN233   | <i>D. palaestinae</i> transcriptome | 359.11 | 51 | 37 | 24 | 1.6643  | 76.82  | SVSP   |
| 21                                                            | TRINITY_DN132   | <i>D. palaestinae</i> transcriptome | 293.5  | 30 | 29 | 29 | 0.7847  | 110.24 | SVSP   |
| 22                                                            | TRINITY_DN91    | <i>D. palaestinae</i> transcriptome | 192.1  | 8  | 7  | 4  | 0.0046  | 110.85 | SVSP   |
| 23                                                            | TRINITY_DN283   | <i>D. palaestinae</i> transcriptome | 165.03 | 10 | 8  | 8  | 0.0114  | 106.18 | SVSP   |
| 24                                                            | XP_034291429.1  | <i>Pantherophis guttatus</i>        | 148.76 | 5  | 4  | 1  | 0.0005  | 113.38 | SVSP   |
| <b>Lectins: 28.923%</b>                                       |                 |                                     |        |    |    |    |         |        |        |
| 25                                                            | TRINITY_DN59    | <i>D. palaestinae</i> transcriptome | 243.26 | 37 | 21 | 18 | 19.4976 | 17.72  | Lectin |
| 26                                                            | TRINITY_DN554   | <i>D. palaestinae</i> transcriptome | 226.4  | 16 | 8  | 8  | 3.6991  | 18.18  | Lectin |
| 27                                                            | ADK22823.1      | <i>Daboia siamensis</i>             | 197.97 | 31 | 12 | 4  | 0.0244  | 17.50  | Lectin |
| 28                                                            | TRINITY_DN64    | <i>D. palaestinae</i> transcriptome | 193.05 | 37 | 8  | 1  | 0.0287  | 14.8   | Lectin |
| 29                                                            | ADK22827.1      | <i>Daboia russelii</i>              | 188.3  | 28 | 8  | 1  | 0.0309  | 18.10  | Lectin |
| 30                                                            | ADK22824.1      | <i>Daboia siamensis</i>             | 186.62 | 35 | 10 | 6  | 3.3302  | 18.06  | Lectin |
| 31                                                            | TRINITY_DN59    | <i>D. palaestinae</i> transcriptome | 169.25 | 23 | 5  | 1  | 0.0204  | 17.59  | Lectin |
| 32                                                            | TRINITY_DN278   | <i>D. palaestinae</i> transcriptome | 169.22 | 33 | 6  | 1  | 0.0095  | 14.04  | Lectin |
| 33                                                            | TRINITY_DN59    | <i>D. palaestinae</i> transcriptome | 166.98 | 37 | 9  | 1  | 0.0098  | 15.35  | Lectin |
| 34                                                            | APB93444.1      | <i>Vipera ammodytes ammodytes</i>   | 156.68 | 34 | 8  | 1  | 0.0495  | 17.28  | Lectin |
| 35                                                            | TRINITY_DN743   | <i>D. palaestinae</i> transcriptome | 148.55 | 15 | 3  | 3  | 0.0390  | 21.19  | Lectin |
| 36                                                            | TRINITY_DN4675  | <i>D. palaestinae</i> transcriptome | 137.11 | 13 | 3  | 2  | 0.0957  | 21.08  | Lectin |
| 37                                                            | TRINITY_DN59    | <i>D. palaestinae</i> transcriptome | 137.06 | 22 | 3  | 1  | 0.3197  | 15.02  | Lectin |
| 38                                                            | TRINITY_DN12452 | <i>D. palaestinae</i> transcriptome | 126.04 | 19 | 2  | 2  | 1.5737  | 13.39  | Lectin |
| 39                                                            | P0DJL5.1        | <i>Daboia palaestinae</i>           | 116.25 | 22 | 3  | 3  | 0.0094  | 15.15  | Lectin |
| 40                                                            | TRINITY_DN554   | <i>D. palaestinae</i> transcriptome | 114.68 | 20 | 3  | 1  | 0.1770  | 15.33  | Lectin |
| 41                                                            | AAB36402.1      | <i>Echis carinatus</i>              | 85.29  | 13 | 3  | 1  | 0.0050  | 14.37  | Lectin |
| 42                                                            | TRINITY_DN1911  | <i>D. palaestinae</i> transcriptome | 46.25  | 25 | 1  | 1  | 0.0030  | 5.00   | Lectin |
| <b>Phospholipase A<sub>2</sub> (PLA<sub>2</sub>): 12.209%</b> |                 |                                     |        |    |    |    |         |        |        |
| 43                                                            | AAZ53176.1      | <i>Daboia siamensis</i>             | 195.25 | 40 | 13 | 9  | 10.9150 | 15.58  | PLA2   |

|                                                          |                |                                     |        |    |    |    |        |       |      |
|----------------------------------------------------------|----------------|-------------------------------------|--------|----|----|----|--------|-------|------|
| 44                                                       | CAR40186.1     | <i>Macrovipera lebetina</i>         | 169.6  | 28 | 6  | 2  | 1.2759 | 15.39 | PLA2 |
| 45                                                       | 1OQS           | <i>Daboia siamensis</i>             | 89.8   | 14 | 2  | 2  | 0.0136 | 13.81 | PLA2 |
| 46                                                       | CAE47141.1     | <i>Vipera aspis aspis</i>           | 75.31  | 12 | 2  | 1  | 0.0041 | 15.46 | PLA2 |
| <b>L-amino-acid oxidase (LAAO): 6.564%</b>               |                |                                     |        |    |    |    |        |       |      |
| 47                                                       | TRINITY_DN9    | <i>D. palaestinae</i> transcriptome | 397.42 | 65 | 68 | 13 | 6.5640 | 57.04 | LAAO |
| <b>Vascular endothelial growth factor (VEGF): 5.596%</b> |                |                                     |        |    |    |    |        |       |      |
| 48                                                       | P0DL42.1       | <i>Daboia siamensis</i>             | 206.88 | 39 | 13 | 11 | 5.2859 | 12.55 | VEGF |
| 49                                                       | TRINITY_DN588  | <i>D. palaestinae</i> transcriptome | 135.41 | 20 | 5  | 1  | 0.0010 | 17.10 | VEGF |
| 50                                                       | P82475.2       | <i>Macrovipera lebetina</i>         | 130.5  | 26 | 5  | 3  | 0.3094 | 12.57 | VEGF |
| <b>Snake venom metalloproteinases (SVMP): 3.384%</b>     |                |                                     |        |    |    |    |        |       |      |
| 51                                                       | TRINITY_DN30   | <i>D. palaestinae</i> transcriptome | 254.87 | 13 | 16 | 2  | 0.0211 | 69.49 | SVMP |
| 52                                                       | TRINITY_DN1385 | <i>D. palaestinae</i> transcriptome | 231.26 | 40 | 11 | 3  | 0.6196 | 15.27 | SVMP |
| 53                                                       | Q4VM07.1       | <i>Macrovipera lebetina</i>         | 205.78 | 12 | 12 | 3  | 0.0351 | 68.84 | SVMP |
| 54                                                       | TRINITY_DN459  | <i>D. palaestinae</i> transcriptome | 199.41 | 11 | 7  | 2  | 2.3161 | 15.03 | SVMP |
| 55                                                       | TRINITY_DN459  | <i>D. palaestinae</i> transcriptome | 183.64 | 13 | 6  | 1  | 0.0182 | 14.96 | SVMP |
| 56                                                       | B8K1W0.1       | <i>Daboia russelii</i>              | 178.02 | 10 | 10 | 7  | 0.1134 | 69.55 | SVMP |
| 57                                                       | AUF41660.1     | <i>Daboia siamensis</i>             | 170.03 | 10 | 7  | 1  | 0.0005 | 69.15 | SVMP |
| 58                                                       | QBF53416.1     | <i>Vipera ammodytes ammodytes</i>   | 167.52 | 9  | 4  | 1  | 0.0002 | 36.83 | SVMP |
| 59                                                       | TRINITY_DN714  | <i>D. palaestinae</i> transcriptome | 161.86 | 15 | 5  | 1  | 0.0044 | 38.79 | SVMP |
| 60                                                       | TRINITY_DN2452 | <i>D. palaestinae</i> transcriptome | 130.54 | 24 | 5  | 2  | 0.0236 | 24.82 | SVMP |
| 61                                                       | ADJ67475.1     | <i>Daboia russelii</i>              | 127.31 | 5  | 3  | 1  | 0.0001 | 69.52 | SVMP |
| 62                                                       | TRINITY_DN471  | <i>D. palaestinae</i> transcriptome | 123.14 | 19 | 2  | 1  | 0.0631 | 12.05 | SVMP |
| 63                                                       | ADI47590.1     | <i>Echis carinatus sochureki</i>    | 104.6  | 5  | 2  | 1  | 0.0173 | 69.52 | SVMP |
| 64                                                       | TRINITY_DN2736 | <i>D. palaestinae</i> transcriptome | 103.13 | 14 | 2  | 2  | 0.0105 | 10.84 | SVMP |
| 65                                                       | TRINITY_DN471  | <i>D. palaestinae</i> transcriptome | 102.97 | 11 | 1  | 1  | 0.0906 | 12.38 | SVMP |
| 66                                                       | TRINITY_DN2452 | <i>D. palaestinae</i> transcriptome | 77.88  | 9  | 2  | 2  | 0.0103 | 12.33 | SVMP |
| 67                                                       | ADI47595.1     | <i>Echis carinatus sochureki</i>    | 73.04  | 6  | 1  | 1  | 0.0381 | 29.96 | SVMP |
| 68                                                       | JAS05406.1     | <i>Sistrurus miliarius barbouri</i> | 60.18  | 2  | 1  | 1  | 0.0018 | 67.26 | SVMP |
| 69                                                       | CAJ01683.1     | <i>Echis ocellatus</i>              | 48.76  | 3  | 1  | 1  | 0.0003 | 69.59 | SVMP |

|                                                         |                |                                               |        |    |    |    |        |        |               |
|---------------------------------------------------------|----------------|-----------------------------------------------|--------|----|----|----|--------|--------|---------------|
| <b>5'-nucleotidase (5'-NT): 0.749%</b>                  |                |                                               |        |    |    |    |        |        |               |
| 70                                                      | AHJ80886.1     | <i>Macrovipera lebetina</i>                   | 337.24 | 49 | 30 | 12 | 0.6746 | 45.03  | 5'-NT         |
| 71                                                      | TRINITY_DN266  | <i>D. palaestinae</i> transcriptome           | 248.99 | 36 | 9  | 1  | 0.0657 | 31.95  | 5'-NT         |
| 72                                                      | QHR82712.1     | <i>Vipera anatolica senliki</i>               | 229.92 | 32 | 9  | 1  | 0.0089 | 32.55  | 5'-NT         |
| <b>Phospholipase B (PLB): 0.56%</b>                     |                |                                               |        |    |    |    |        |        |               |
| 73                                                      | TRINITY_DN0    | <i>D. palaestinae</i> transcriptome           | 307.8  | 38 | 25 | 12 | 0.5602 | 64.29  | PLB           |
| 74                                                      | BAN82155.1     | <i>Ovophis okinavensis</i>                    | 251.91 | 22 | 14 | 1  | 0.0002 | 64.13  | PLB           |
| <b>Phosphodiesterase (PDE): 0.252%</b>                  |                |                                               |        |    |    |    |        |        |               |
| 75                                                      | TRINITY_DN1507 | <i>D. palaestinae</i> transcriptome           | 257.03 | 24 | 16 | 9  | 0.2478 | 86.50  | PDE           |
| 76                                                      | XP_034278116.1 | <i>Pantherophis guttatus</i>                  | 126.21 | 5  | 5  | 5  | 0.0038 | 100.97 | PDE           |
| <b>Kunitz-type serine protease (Kunitz): 0.218%</b>     |                |                                               |        |    |    |    |        |        |               |
| 77                                                      | A8Y7P1.1       | <i>Daboia siamensis</i>                       | 92.2   | 12 | 2  | 2  | 0.0102 | 9.31   | Kunitz        |
| 78                                                      | AFD04723.1     | <i>Daboia russelii</i>                        | 87.78  | 11 | 2  | 2  | 0.0671 | 10.01  | Kunitz        |
| 79                                                      | ABD24041.1     | <i>Daboia russelii</i>                        | 86.71  | 26 | 3  | 3  | 0.0050 | 9.68   | Kunitz        |
| 80                                                      | P00990.1       | <i>Daboia russelii</i>                        | 76.97  | 17 | 2  | 2  | 0.0602 | 6.85   | Kunitz        |
| 81                                                      | CCH15044.1     | <i>Macrovipera lebetina transmediterranea</i> | 63.13  | 9  | 1  | 1  | 0.0756 | 10.56  | Kunitz        |
| <b>Disintegrin: 0.052%</b>                              |                |                                               |        |    |    |    |        |        |               |
| 82                                                      | TRINITY_DN459  | <i>D. palaestinae</i> transcriptome           | 94.14  | 11 | 1  | 1  | 0.0415 | 14.40  | Disintegrin   |
| 83                                                      | CAJ34939.1     | <i>Macrovipera lebetina</i>                   | 61.72  | 19 | 1  | 1  | 0.0103 | 11.49  | Disintegrin   |
| <b>Cysteine-rich secretory proteins (CRISP): 0.043%</b> |                |                                               |        |    |    |    |        |        |               |
| 84                                                      | ACE73567.1     | <i>Daboia russelii</i>                        | 175.01 | 15 | 4  | 2  | 0.0379 | 26.68  | CRISP         |
| 85                                                      | TRINITY_DN1793 | <i>D. palaestinae</i> transcriptome           | 155.08 | 21 | 4  | 1  | 0.0008 | 26.75  | CRISP         |
| 86                                                      | CAP74088.1     | <i>Vipera berus nikolskii</i>                 | 127.36 | 14 | 3  | 1  | 0.0041 | 24.61  | CRISP         |
| <b>Nerve growth factor (NGF): 0.039%</b>                |                |                                               |        |    |    |    |        |        |               |
| 87                                                      | JAS04521.1     | <i>Agkistrodon conanti</i>                    | 128.01 | 12 | 3  | 1  | 0.0375 | 27.10  | NGF           |
| 88                                                      | AEH59582.1     | <i>Vipera ursinii</i>                         | 120.92 | 12 | 3  | 1  | 0.0014 | 27.28  | NGF           |
| <b>Hyaluronidases: 0.024%</b>                           |                |                                               |        |    |    |    |        |        |               |
| 88                                                      | TRINITY_DN3925 | <i>D. palaestinae</i> transcriptome           | 157.17 | 14 | 6  | 6  | 0.0238 | 52.50  | Hyaluronidase |

|                         |               |                                     |        |    |   |   |        |       |          |
|-------------------------|---------------|-------------------------------------|--------|----|---|---|--------|-------|----------|
| <b>Cystatin: 0.005%</b> |               |                                     |        |    |   |   |        |       |          |
| 90                      | TRINITY_DN195 | <i>D. palaestinae</i> transcriptome | 156.4  | 23 | 5 | 5 | 0.0046 | 22.37 | Cystatin |
| <b>Serpin: 0.001%</b>   |               |                                     |        |    |   |   |        |       |          |
| 91                      | JAG46182.1    | <i>Crotalus horridus</i>            | 109.91 | 6  | 2 | 2 | 0.0006 | 44.17 | Serpin   |

**Supplementary Table S2: Venom gland transcriptome assembly statistics**

| Reads                 |            |            |            | Assembly  |             |      |
|-----------------------|------------|------------|------------|-----------|-------------|------|
| Tissue                | Raw        | Filtered   | Expressed  | Annotated | Transcripts | N50  |
| Venom gland 1 (left)  | 41,875,666 | 38,323,871 | 32,975,671 | 67,980    | 1,91,425    | 1812 |
| Venom gland 2 (right) | 43,278,432 | 39,637,721 | 34,484,363 |           |             |      |

**Supplementary Table S3: Comparative transcriptomics of the left and right venom glands of *D. palaestinae***

| Sr. no | Isoform                  | VG1 (left) | Abundance VG1 | VG2 (right) | Abundance VG2 | Family          |
|--------|--------------------------|------------|---------------|-------------|---------------|-----------------|
| 1      | TRINITY_DN266_c0_g1_i3   | 75918      | 0.5688%       | 56126       | 0.5114%       | 5'-nucleotidase |
| 2      | TRINITY_DN266_c0_g1_i8   | 75918      |               | 56126       |               | 5'-nucleotidase |
| 3      | TRINITY_DN266_c0_g1_i12  | 75918      |               | 56126       |               | 5'-nucleotidase |
| 4      | TRINITY_DN266_c0_g1_i11  | 75918      |               | 56126       |               | 5'-nucleotidase |
| 5      | TRINITY_DN1277_c0_g1_i6  | 1129       |               | 1172        |               | 5'-nucleotidase |
| 6      | TRINITY_DN1430_c0_g2_i3  | 253        |               | 205         |               | 5'-nucleotidase |
| 7      | TRINITY_DN1430_c0_g2_i2  | 253        |               | 205         |               | 5'-nucleotidase |
| 8      | TRINITY_DN3725_c0_g2_i4  | 163        |               | 157         |               | 5'-nucleotidase |
| 9      | TRINITY_DN3725_c0_g2_i11 | 163        |               | 157         |               | 5'-nucleotidase |
| 10     | TRINITY_DN1046_c0_g1_i1  | 127        |               | 144         |               | 5'-nucleotidase |
| 11     | TRINITY_DN1793_c0_g1_i7  | 445        | 0.0020%       | 501         | 0.0027%       | CRISP           |
| 12     | TRINITY_DN1793_c0_g1_i9  | 445        |               | 501         |               | CRISP           |
| 13     | TRINITY_DN11831_c0_g1_i1 | 186        |               | 190         |               | CRISP           |
| 14     | TRINITY_DN160_c1_g1_i8   | 785308     | 1.4632%       | 667403      | 1.5094%       | Disintegrin     |
| 15     | TRINITY_DN39_c1_g1_i1    | 800        |               | 723         |               | Disintegrin     |
| 16     | TRINITY_DN1910_c1_g1_i2  | 201        |               | 185         |               | Disintegrin     |
| 17     | TRINITY_DN10769_c0_g1_i2 | 127        |               | 144         |               | Disintegrin     |
| 18     | TRINITY_DN10769_c0_g1_i5 | 127        |               | 144         |               | Disintegrin     |
| 19     | TRINITY_DN3925_c0_g1_i6  | 9936       | 0.1109%       | 8753        | 0.1186%       | Hyaluronidase   |
| 20     | TRINITY_DN3925_c0_g1_i3  | 9936       |               | 8753        |               | Hyaluronidase   |
| 21     | TRINITY_DN3925_c0_g1_i1  | 9936       |               | 8753        |               | Hyaluronidase   |
| 22     | TRINITY_DN3925_c0_g1_i5  | 9936       |               | 8753        |               | Hyaluronidase   |
| 23     | TRINITY_DN3925_c0_g1_i2  | 9936       |               | 8753        |               | Hyaluronidase   |
| 24     | TRINITY_DN3925_c0_g1_i4  | 9936       |               | 8753        |               | Hyaluronidase   |

|    |                         |        |          |        |          |        |
|----|-------------------------|--------|----------|--------|----------|--------|
| 25 | TRINITY_DN2597_c0_g1_i2 | 1645   | 0.0122%  | 1595   | 0.0144%  | Kazal  |
| 26 | TRINITY_DN2597_c0_g1_i1 | 1645   |          | 1595   |          | Kazal  |
| 27 | TRINITY_DN2597_c0_g1_i4 | 1645   |          | 1595   |          | Kazal  |
| 28 | TRINITY_DN2597_c0_g1_i3 | 1645   |          | 1595   |          | Kazal  |
| 29 | TRINITY_DN151_c0_g1_i2  | 451774 | 6.7415%  | 347728 | 6.3030%  | Kunitz |
| 30 | TRINITY_DN151_c0_g1_i6  | 451774 |          | 347728 |          | Kunitz |
| 31 | TRINITY_DN151_c0_g1_i7  | 451774 |          | 347728 |          | Kunitz |
| 32 | TRINITY_DN151_c0_g1_i9  | 451774 |          | 347728 |          | Kunitz |
| 33 | TRINITY_DN151_c0_g1_i8  | 451774 |          | 347728 |          | Kunitz |
| 34 | TRINITY_DN151_c0_g1_i10 | 451774 |          | 347728 |          | Kunitz |
| 35 | TRINITY_DN151_c0_g1_i17 | 451774 |          | 347728 |          | Kunitz |
| 36 | TRINITY_DN151_c0_g1_i3  | 451774 |          | 347728 |          | Kunitz |
| 37 | TRINITY_DN395_c0_g1_i1  | 2640   |          | 2760   |          | Kunitz |
| 38 | TRINITY_DN395_c0_g1_i3  | 2640   |          | 2760   |          | Kunitz |
| 39 | TRINITY_DN395_c0_g1_i2  | 2640   |          | 2760   |          | Kunitz |
| 40 | TRINITY_DN503_c1_g5_i1  | 1965   |          | 1829   |          | Kunitz |
| 41 | TRINITY_DN9_c0_g2_i12   | 718296 | 5.3457%  | 577361 | 5.2150%  | LAO    |
| 42 | TRINITY_DN9_c0_g2_i14   | 718296 |          | 577361 |          | LAO    |
| 43 | TRINITY_DN9_c0_g2_i5    | 718296 |          | 577361 |          | LAO    |
| 44 | TRINITY_DN9_c0_g2_i10   | 718296 |          | 577361 |          | LAO    |
| 45 | TRINITY_DN9_c0_g1_i1    | 373    |          | 348    |          | LAO    |
| 46 | TRINITY_DN9257_c0_g1_i1 | 157    |          | 223    |          | LAO    |
| 47 | TRINITY_DN59_c0_g1_i8   | 962329 | 26.2005% | 736863 | 24.4659% | Lectin |
| 48 | TRINITY_DN59_c0_g1_i18  | 962329 |          | 736863 |          | Lectin |
| 49 | TRINITY_DN59_c0_g1_i6   | 962329 |          | 736863 |          | Lectin |
| 50 | TRINITY_DN59_c0_g1_i14  | 962329 |          | 736863 |          | Lectin |
| 51 | TRINITY_DN59_c0_g1_i7   | 962329 |          | 736863 |          | Lectin |

|    |                          |        |  |        |  |        |
|----|--------------------------|--------|--|--------|--|--------|
| 52 | TRINITY_DN59_c0_g1_i2    | 962329 |  | 736863 |  | Lectin |
| 53 | TRINITY_DN59_c0_g1_i5    | 962329 |  | 736863 |  | Lectin |
| 54 | TRINITY_DN59_c0_g1_i12   | 962329 |  | 736863 |  | Lectin |
| 55 | TRINITY_DN59_c0_g1_i4    | 962329 |  | 736863 |  | Lectin |
| 56 | TRINITY_DN59_c0_g1_i10   | 962329 |  | 736863 |  | Lectin |
| 57 | TRINITY_DN59_c0_g1_i9    | 962329 |  | 736863 |  | Lectin |
| 58 | TRINITY_DN59_c0_g1_i3    | 962329 |  | 736863 |  | Lectin |
| 59 | TRINITY_DN64_c2_g2_i1    | 153849 |  | 129673 |  | Lectin |
| 60 | TRINITY_DN64_c2_g1_i12   | 155868 |  | 124797 |  | Lectin |
| 61 | TRINITY_DN64_c2_g1_i2    | 155868 |  | 124797 |  | Lectin |
| 62 | TRINITY_DN278_c0_g1_i2   | 132315 |  | 111782 |  | Lectin |
| 63 | TRINITY_DN278_c0_g1_i1   | 132315 |  | 111782 |  | Lectin |
| 64 | TRINITY_DN278_c0_g1_i13  | 132315 |  | 111782 |  | Lectin |
| 65 | TRINITY_DN14197_c0_g1_i2 | 114301 |  | 93202  |  | Lectin |
| 66 | TRINITY_DN14197_c0_g1_i6 | 114301 |  | 93202  |  | Lectin |
| 67 | TRINITY_DN554_c0_g1_i9   | 108778 |  | 89229  |  | Lectin |
| 68 | TRINITY_DN554_c0_g1_i8   | 108778 |  | 89229  |  | Lectin |
| 69 | TRINITY_DN406_c1_g1_i9   | 55746  |  | 43058  |  | Lectin |
| 70 | TRINITY_DN406_c1_g1_i6   | 55746  |  | 43058  |  | Lectin |
| 71 | TRINITY_DN406_c1_g1_i4   | 55746  |  | 43058  |  | Lectin |
| 72 | TRINITY_DN406_c1_g1_i13  | 55746  |  | 43058  |  | Lectin |
| 73 | TRINITY_DN406_c1_g1_i12  | 55746  |  | 43058  |  | Lectin |
| 74 | TRINITY_DN406_c1_g1_i7   | 55746  |  | 43058  |  | Lectin |
| 75 | TRINITY_DN406_c1_g1_i11  | 55746  |  | 43058  |  | Lectin |
| 76 | TRINITY_DN406_c1_g1_i1   | 55746  |  | 43058  |  | Lectin |
| 77 | TRINITY_DN406_c1_g1_i8   | 55746  |  | 43058  |  | Lectin |
| 78 | TRINITY_DN743_c0_g2_i6   | 57984  |  | 37922  |  | Lectin |

|     |                          |       |  |       |  |        |
|-----|--------------------------|-------|--|-------|--|--------|
| 79  | TRINITY_DN743_c0_g2_i8   | 57984 |  | 37922 |  | Lectin |
| 80  | TRINITY_DN743_c0_g2_i4   | 57984 |  | 37922 |  | Lectin |
| 81  | TRINITY_DN743_c0_g2_i7   | 57984 |  | 37922 |  | Lectin |
| 82  | TRINITY_DN743_c0_g2_i5   | 57984 |  | 37922 |  | Lectin |
| 83  | TRINITY_DN64_c0_g2_i1    | 34600 |  | 26239 |  | Lectin |
| 84  | TRINITY_DN64_c0_g2_i7    | 34600 |  | 26239 |  | Lectin |
| 85  | TRINITY_DN64_c0_g2_i5    | 34600 |  | 26239 |  | Lectin |
| 86  | TRINITY_DN2895_c0_g2_i5  | 19892 |  | 14016 |  | Lectin |
| 87  | TRINITY_DN12452_c0_g1_i2 | 16379 |  | 14453 |  | Lectin |
| 88  | TRINITY_DN12452_c0_g1_i1 | 16379 |  | 14453 |  | Lectin |
| 89  | TRINITY_DN712_c0_g1_i1   | 14673 |  | 10557 |  | Lectin |
| 90  | TRINITY_DN712_c0_g1_i2   | 14673 |  | 10557 |  | Lectin |
| 91  | TRINITY_DN1142_c0_g1_i3  | 14999 |  | 9308  |  | Lectin |
| 92  | TRINITY_DN4209_c1_g1_i1  | 10672 |  | 8104  |  | Lectin |
| 93  | TRINITY_DN5166_c0_g2_i3  | 7721  |  | 5562  |  | Lectin |
| 94  | TRINITY_DN5166_c0_g2_i8  | 7721  |  | 5562  |  | Lectin |
| 95  | TRINITY_DN5166_c0_g2_i7  | 7721  |  | 5562  |  | Lectin |
| 96  | TRINITY_DN5166_c0_g2_i6  | 7721  |  | 5562  |  | Lectin |
| 97  | TRINITY_DN5166_c0_g2_i4  | 7721  |  | 5562  |  | Lectin |
| 98  | TRINITY_DN665_c0_g1_i2   | 6115  |  | 6340  |  | Lectin |
| 99  | TRINITY_DN5315_c0_g1_i1  | 2539  |  | 2574  |  | Lectin |
| 100 | TRINITY_DN292_c0_g1_i11  | 2066  |  | 1797  |  | Lectin |
| 101 | TRINITY_DN292_c0_g1_i12  | 2066  |  | 1797  |  | Lectin |
| 102 | TRINITY_DN292_c0_g1_i2   | 2066  |  | 1797  |  | Lectin |
| 103 | TRINITY_DN404_c2_g1_i7   | 2168  |  | 1510  |  | Lectin |
| 104 | TRINITY_DN404_c2_g1_i3   | 2168  |  | 1510  |  | Lectin |
| 105 | TRINITY_DN404_c2_g1_i14  | 2168  |  | 1510  |  | Lectin |

|     |                          |        |         |        |         |                     |
|-----|--------------------------|--------|---------|--------|---------|---------------------|
| 106 | TRINITY_DN2775_c0_g1_i3  | 1831   |         | 1433   |         | Lectin              |
| 107 | TRINITY_DN2775_c0_g1_i4  | 1831   |         | 1433   |         | Lectin              |
| 108 | TRINITY_DN8529_c0_g1_i2  | 1666   |         | 870    |         | Lectin              |
| 109 | TRINITY_DN9961_c0_g1_i3  | 819    |         | 690    |         | Lectin              |
| 110 | TRINITY_DN4429_c2_g1_i1  | 658    |         | 404    |         | Lectin              |
| 111 | TRINITY_DN4300_c0_g1_i2  | 416    |         | 344    |         | Lectin              |
| 112 | TRINITY_DN33170_c0_g1_i1 | 301    |         | 362    |         | Lectin              |
| 113 | TRINITY_DN823_c1_g1_i3   | 302    |         | 231    |         | Lectin              |
| 114 | TRINITY_DN1142_c0_g2_i1  | 296    |         | 181    |         | Lectin              |
| 115 | TRINITY_DN4039_c0_g1_i1  | 210    |         | 166    |         | Lectin              |
| 116 | TRINITY_DN3466_c0_g1_i7  | 162    |         | 142    |         | Lectin              |
| 117 | TRINITY_DN3466_c0_g1_i4  | 162    |         | 142    |         | Lectin              |
| 118 | TRINITY_DN3466_c0_g1_i9  | 162    |         | 142    |         | Lectin              |
| 119 | TRINITY_DN27565_c0_g1_i1 | 159    |         | 78     |         | Lectin              |
| 120 | TRINITY_DN27565_c0_g1_i2 | 159    |         | 78     |         | Lectin              |
| 121 | TRINITY_DN64_c2_g1_i9    | 155868 |         | 124797 |         | Lectin              |
| 122 | TRINITY_DN235_c0_g2_i2   | 737    | 0.0036% | 800    | 0.0045% | Natriuretic peptide |
| 123 | TRINITY_DN22914_c0_g1_i6 | 593    |         | 602    |         | Natriuretic peptide |
| 124 | TRINITY_DN22914_c0_g1_i8 | 593    |         | 602    |         | Natriuretic peptide |
| 125 | TRINITY_DN300_c0_g2_i2   | 21283  | 0.0792% | 19327  | 0.0873% | Neprilysin          |
| 126 | TRINITY_DN300_c0_g2_i1   | 21283  |         | 19327  |         | Neprilysin          |
| 127 | TRINITY_DN1356_c0_g1_i2  | 34629  | 0.4517% | 27064  | 0.4286% | NGF                 |
| 128 | TRINITY_DN1356_c0_g1_i4  | 34629  |         | 27064  |         | NGF                 |
| 129 | TRINITY_DN1356_c0_g1_i17 | 34629  |         | 27064  |         | NGF                 |
| 130 | TRINITY_DN1356_c0_g1_i10 | 34629  |         | 27064  |         | NGF                 |
| 131 | TRINITY_DN1356_c0_g1_i20 | 34629  |         | 27064  |         | NGF                 |
| 132 | TRINITY_DN1356_c0_g1_i13 | 34629  |         | 27064  |         | NGF                 |

|     |                          |         |          |        |          |      |
|-----|--------------------------|---------|----------|--------|----------|------|
| 133 | TRINITY_DN1356_c0_g1_i14 | 34629   |          | 27064  |          | NGF  |
| 134 | TRINITY_DN2461_c0_g1_i1  | 303     |          | 289    |          | NGF  |
| 135 | TRINITY_DN10993_c0_g2_i1 | 124     |          | 107    |          | NGF  |
| 136 | TRINITY_DN1507_c0_g1_i3  | 10438   | 0.3500%  | 8762   | 0.3567%  | PDE  |
| 137 | TRINITY_DN1507_c0_g1_i5  | 10438   |          | 8762   |          | PDE  |
| 138 | TRINITY_DN1507_c0_g1_i21 | 10438   |          | 8762   |          | PDE  |
| 139 | TRINITY_DN1507_c0_g1_i24 | 10438   |          | 8762   |          | PDE  |
| 140 | TRINITY_DN1507_c0_g1_i17 | 10438   |          | 8762   |          | PDE  |
| 141 | TRINITY_DN1507_c0_g1_i22 | 10438   |          | 8762   |          | PDE  |
| 142 | TRINITY_DN1507_c0_g1_i10 | 10438   |          | 8762   |          | PDE  |
| 143 | TRINITY_DN1507_c0_g1_i9  | 10438   |          | 8762   |          | PDE  |
| 144 | TRINITY_DN1507_c0_g1_i20 | 10438   |          | 8762   |          | PDE  |
| 145 | TRINITY_DN1507_c0_g1_i25 | 10438   |          | 8762   |          | PDE  |
| 146 | TRINITY_DN1507_c0_g1_i15 | 10438   |          | 8762   |          | PDE  |
| 147 | TRINITY_DN1507_c0_g1_i13 | 10438   |          | 8762   |          | PDE  |
| 148 | TRINITY_DN1507_c0_g1_i19 | 10438   |          | 8762   |          | PDE  |
| 149 | TRINITY_DN1507_c0_g1_i18 | 10438   |          | 8762   |          | PDE  |
| 150 | TRINITY_DN1507_c0_g1_i1  | 10438   |          | 8762   |          | PDE  |
| 151 | TRINITY_DN1507_c0_g1_i7  | 10438   |          | 8762   |          | PDE  |
| 152 | TRINITY_DN1507_c0_g1_i6  | 10438   |          | 8762   |          | PDE  |
| 153 | TRINITY_DN1507_c0_g1_i26 | 10438   |          | 8762   |          | PDE  |
| 154 | TRINITY_DN24352_c0_g1_i1 | 163     |          | 182    |          | PDE  |
| 155 | TRINITY_DN7710_c0_g1_i2  | 106     |          | 94     |          | PDE  |
| 156 | TRINITY_DN0_c3_g2_i4     | 1250341 | 11.6991% | 917455 | 10.4250% | PLA2 |
| 157 | TRINITY_DN0_c3_g2_i1     | 1250341 |          | 917455 |          | PLA2 |
| 158 | TRINITY_DN0_c3_g2_i3     | 1250341 |          | 917455 |          | PLA2 |
| 159 | TRINITY_DN0_c3_g2_i5     | 1250341 |          | 917455 |          | PLA2 |

|     |                          |         |         |        |         |      |
|-----|--------------------------|---------|---------|--------|---------|------|
| 160 | TRINITY_DN0_c3_g2_i6     | 1250341 |         | 917455 |         | PLA2 |
| 161 | TRINITY_DN191_c0_g2_i2   | 7999    |         | 6715   |         | PLA2 |
| 162 | TRINITY_DN191_c0_g2_i1   | 7999    |         | 6715   |         | PLA2 |
| 163 | TRINITY_DN191_c0_g2_i3   | 7999    |         | 6715   |         | PLA2 |
| 164 | TRINITY_DN595_c0_g1_i2   | 5954    |         | 4747   |         | PLA2 |
| 165 | TRINITY_DN423_c1_g3_i1   | 562     |         | 462    |         | PLA2 |
| 166 | TRINITY_DN2075_c0_g1_i3  | 639     |         | 349    |         | PLA2 |
| 167 | TRINITY_DN2075_c0_g1_i2  | 639     |         | 349    |         | PLA2 |
| 168 | TRINITY_DN2075_c0_g1_i5  | 639     |         | 349    |         | PLA2 |
| 169 | TRINITY_DN2075_c0_g1_i1  | 639     |         | 349    |         | PLA2 |
| 170 | TRINITY_DN423_c1_g1_i3   | 471     |         | 302    |         | PLA2 |
| 171 | TRINITY_DN423_c1_g1_i4   | 471     |         | 302    |         | PLA2 |
| 172 | TRINITY_DN423_c1_g1_i1   | 471     |         | 302    |         | PLA2 |
| 173 | TRINITY_DN979_c0_g1_i6   | 324     |         | 330    |         | PLA2 |
| 174 | TRINITY_DN979_c0_g1_i10  | 324     |         | 330    |         | PLA2 |
| 175 | TRINITY_DN2209_c0_g1_i11 | 290     |         | 308    |         | PLA2 |
| 176 | TRINITY_DN2209_c0_g1_i1  | 290     |         | 308    |         | PLA2 |
| 177 | TRINITY_DN2209_c0_g1_i7  | 290     |         | 308    |         | PLA2 |
| 178 | TRINITY_DN2209_c0_g1_i8  | 290     |         | 308    |         | PLA2 |
| 179 | TRINITY_DN2209_c0_g1_i10 | 290     |         | 308    |         | PLA2 |
| 180 | TRINITY_DN4463_c0_g1_i1  | 203     |         | 158    |         | PLA2 |
| 181 | TRINITY_DN4463_c0_g1_i4  | 203     |         | 158    |         | PLA2 |
| 182 | TRINITY_DN4463_c0_g1_i3  | 203     |         | 158    |         | PLA2 |
| 183 | TRINITY_DN4463_c0_g1_i2  | 203     |         | 158    |         | PLA2 |
| 184 | TRINITY_DN0_c36_g2_i2    | 49906   | 0.1859% | 40375  | 0.1827% | PLB  |
| 185 | TRINITY_DN0_c36_g2_i1    | 49906   |         | 40375  |         | PLB  |
| 186 | TRINITY_DN12219_c0_g2_i1 | 137     |         | 157    |         | PLB  |

|     |                          |        |          |        |          |      |
|-----|--------------------------|--------|----------|--------|----------|------|
| 187 | TRINITY_DN30_c0_g1_i3    | 681168 | 23.5318% | 577129 | 24.3709% | SVMP |
| 188 | TRINITY_DN30_c0_g1_i9    | 681168 |          | 577129 |          | SVMP |
| 189 | TRINITY_DN30_c0_g1_i8    | 681168 |          | 577129 |          | SVMP |
| 190 | TRINITY_DN30_c0_g1_i5    | 681168 |          | 577129 |          | SVMP |
| 191 | TRINITY_DN30_c0_g1_i11   | 681168 |          | 577129 |          | SVMP |
| 192 | TRINITY_DN30_c0_g1_i6    | 681168 |          | 577129 |          | SVMP |
| 193 | TRINITY_DN30_c0_g1_i15   | 681168 |          | 577129 |          | SVMP |
| 194 | TRINITY_DN30_c0_g1_i14   | 681168 |          | 577129 |          | SVMP |
| 195 | TRINITY_DN30_c0_g1_i12   | 681168 |          | 577129 |          | SVMP |
| 196 | TRINITY_DN30_c0_g1_i4    | 681168 |          | 577129 |          | SVMP |
| 197 | TRINITY_DN30_c0_g1_i10   | 681168 |          | 577129 |          | SVMP |
| 198 | TRINITY_DN30_c0_g1_i1    | 681168 |          | 577129 |          | SVMP |
| 199 | TRINITY_DN3546_c0_g1_i1  | 171971 |          | 156100 |          | SVMP |
| 200 | TRINITY_DN459_c0_g1_i5   | 155256 |          | 139360 |          | SVMP |
| 201 | TRINITY_DN459_c0_g1_i6   | 155256 |          | 139360 |          | SVMP |
| 202 | TRINITY_DN459_c0_g1_i20  | 155256 |          | 139360 |          | SVMP |
| 203 | TRINITY_DN459_c0_g1_i2   | 155256 |          | 139360 |          | SVMP |
| 204 | TRINITY_DN459_c0_g1_i17  | 155256 |          | 139360 |          | SVMP |
| 205 | TRINITY_DN459_c0_g1_i13  | 155256 |          | 139360 |          | SVMP |
| 206 | TRINITY_DN459_c0_g1_i10  | 155256 |          | 139360 |          | SVMP |
| 207 | TRINITY_DN459_c0_g1_i18  | 155256 |          | 139360 |          | SVMP |
| 208 | TRINITY_DN626_c0_g1_i7   | 120375 |          | 116184 |          | SVMP |
| 209 | TRINITY_DN2177_c0_g1_i6  | 96954  |          | 79769  |          | SVMP |
| 210 | TRINITY_DN2177_c0_g1_i10 | 96954  |          | 79769  |          | SVMP |
| 211 | TRINITY_DN2177_c0_g1_i4  | 96954  |          | 79769  |          | SVMP |
| 212 | TRINITY_DN2177_c0_g1_i8  | 96954  |          | 79769  |          | SVMP |
| 213 | TRINITY_DN2177_c0_g1_i7  | 96954  |          | 79769  |          | SVMP |

|     |                         |       |  |       |  |      |
|-----|-------------------------|-------|--|-------|--|------|
| 214 | TRINITY_DN2177_c0_g1_i2 | 96954 |  | 79769 |  | SVMP |
| 215 | TRINITY_DN2177_c0_g1_i9 | 96954 |  | 79769 |  | SVMP |
| 216 | TRINITY_DN2177_c0_g1_i3 | 96954 |  | 79769 |  | SVMP |
| 217 | TRINITY_DN2177_c0_g1_i5 | 96954 |  | 79769 |  | SVMP |
| 218 | TRINITY_DN2452_c0_g1_i4 | 71706 |  | 63531 |  | SVMP |
| 219 | TRINITY_DN2452_c0_g1_i8 | 71706 |  | 63531 |  | SVMP |
| 220 | TRINITY_DN2452_c0_g1_i7 | 71706 |  | 63531 |  | SVMP |
| 221 | TRINITY_DN2452_c0_g1_i5 | 71706 |  | 63531 |  | SVMP |
| 222 | TRINITY_DN2452_c0_g1_i2 | 71706 |  | 63531 |  | SVMP |
| 223 | TRINITY_DN2452_c0_g1_i1 | 71706 |  | 63531 |  | SVMP |
| 224 | TRINITY_DN2452_c0_g1_i3 | 71706 |  | 63531 |  | SVMP |
| 225 | TRINITY_DN459_c2_g1_i1  | 71927 |  | 62740 |  | SVMP |
| 226 | TRINITY_DN459_c2_g1_i2  | 71927 |  | 62740 |  | SVMP |
| 227 | TRINITY_DN1004_c0_g1_i4 | 65759 |  | 52769 |  | SVMP |
| 228 | TRINITY_DN1004_c0_g1_i3 | 65759 |  | 52769 |  | SVMP |
| 229 | TRINITY_DN1004_c0_g1_i1 | 65759 |  | 52769 |  | SVMP |
| 230 | TRINITY_DN1004_c0_g1_i5 | 65759 |  | 52769 |  | SVMP |
| 231 | TRINITY_DN1004_c0_g1_i2 | 65759 |  | 52769 |  | SVMP |
| 232 | TRINITY_DN1385_c0_g1_i4 | 58798 |  | 49893 |  | SVMP |
| 233 | TRINITY_DN1385_c0_g1_i3 | 58798 |  | 49893 |  | SVMP |
| 234 | TRINITY_DN1385_c0_g1_i5 | 58798 |  | 49893 |  | SVMP |
| 235 | TRINITY_DN1385_c0_g1_i6 | 58798 |  | 49893 |  | SVMP |
| 236 | TRINITY_DN1385_c0_g1_i2 | 58798 |  | 49893 |  | SVMP |
| 237 | TRINITY_DN1385_c0_g1_i7 | 58798 |  | 49893 |  | SVMP |
| 238 | TRINITY_DN30_c43_g1_i1  | 49185 |  | 42879 |  | SVMP |
| 239 | TRINITY_DN714_c0_g2_i1  | 44070 |  | 35862 |  | SVMP |
| 240 | TRINITY_DN714_c0_g2_i5  | 44070 |  | 35862 |  | SVMP |

|     |                         |       |  |       |  |      |
|-----|-------------------------|-------|--|-------|--|------|
| 241 | TRINITY_DN714_c0_g2_i3  | 44070 |  | 35862 |  | SVMP |
| 242 | TRINITY_DN714_c0_g2_i6  | 44070 |  | 35862 |  | SVMP |
| 243 | TRINITY_DN714_c0_g2_i4  | 44070 |  | 35862 |  | SVMP |
| 244 | TRINITY_DN714_c0_g2_i2  | 44070 |  | 35862 |  | SVMP |
| 245 | TRINITY_DN714_c0_g2_i7  | 44070 |  | 35862 |  | SVMP |
| 246 | TRINITY_DN3470_c0_g1_i1 | 31787 |  | 25009 |  | SVMP |
| 247 | TRINITY_DN3470_c0_g1_i2 | 31787 |  | 25009 |  | SVMP |
| 248 | TRINITY_DN714_c0_g3_i2  | 28623 |  | 24144 |  | SVMP |
| 249 | TRINITY_DN714_c0_g3_i1  | 28623 |  | 24144 |  | SVMP |
| 250 | TRINITY_DN217_c0_g1_i1  | 24424 |  | 21675 |  | SVMP |
| 251 | TRINITY_DN5928_c0_g1_i1 | 23706 |  | 21041 |  | SVMP |
| 252 | TRINITY_DN5928_c0_g1_i2 | 23706 |  | 21041 |  | SVMP |
| 253 | TRINITY_DN5928_c0_g1_i3 | 23706 |  | 21041 |  | SVMP |
| 254 | TRINITY_DN5928_c0_g1_i4 | 23706 |  | 21041 |  | SVMP |
| 255 | TRINITY_DN5928_c0_g1_i5 | 23706 |  | 21041 |  | SVMP |
| 256 | TRINITY_DN182_c0_g1_i1  | 17762 |  | 16883 |  | SVMP |
| 257 | TRINITY_DN3041_c0_g1_i1 | 12812 |  | 10806 |  | SVMP |
| 258 | TRINITY_DN30_c34_g1_i1  | 11503 |  | 9653  |  | SVMP |
| 259 | TRINITY_DN5926_c2_g1_i5 | 9372  |  | 9611  |  | SVMP |
| 260 | TRINITY_DN2736_c0_g1_i1 | 5906  |  | 4567  |  | SVMP |
| 261 | TRINITY_DN471_c0_g3_i1  | 4099  |  | 4329  |  | SVMP |
| 262 | TRINITY_DN2708_c0_g1_i1 | 4472  |  | 3907  |  | SVMP |
| 263 | TRINITY_DN925_c0_g1_i10 | 3787  |  | 3434  |  | SVMP |
| 264 | TRINITY_DN5016_c0_g1_i5 | 3606  |  | 3308  |  | SVMP |
| 265 | TRINITY_DN3294_c0_g1_i2 | 2695  |  | 2691  |  | SVMP |
| 266 | TRINITY_DN3294_c0_g1_i1 | 2695  |  | 2691  |  | SVMP |
| 267 | TRINITY_DN3294_c0_g1_i4 | 2695  |  | 2691  |  | SVMP |

|     |                          |      |  |      |  |      |
|-----|--------------------------|------|--|------|--|------|
| 268 | TRINITY_DN479_c1_g1_i7   | 2393 |  | 2266 |  | SVMP |
| 269 | TRINITY_DN479_c1_g1_i2   | 2393 |  | 2266 |  | SVMP |
| 270 | TRINITY_DN479_c1_g1_i15  | 2393 |  | 2266 |  | SVMP |
| 271 | TRINITY_DN479_c1_g1_i13  | 2393 |  | 2266 |  | SVMP |
| 272 | TRINITY_DN479_c1_g1_i12  | 2393 |  | 2266 |  | SVMP |
| 273 | TRINITY_DN479_c1_g1_i11  | 2393 |  | 2266 |  | SVMP |
| 274 | TRINITY_DN479_c1_g1_i16  | 2393 |  | 2266 |  | SVMP |
| 275 | TRINITY_DN145_c0_g1_i7   | 1239 |  | 1339 |  | SVMP |
| 276 | TRINITY_DN471_c0_g1_i1   | 1338 |  | 1053 |  | SVMP |
| 277 | TRINITY_DN1550_c0_g1_i1  | 1272 |  | 861  |  | SVMP |
| 278 | TRINITY_DN1550_c0_g1_i2  | 1272 |  | 861  |  | SVMP |
| 279 | TRINITY_DN2736_c0_g2_i1  | 1104 |  | 987  |  | SVMP |
| 280 | TRINITY_DN344_c0_g1_i1   | 923  |  | 974  |  | SVMP |
| 281 | TRINITY_DN344_c0_g1_i5   | 923  |  | 974  |  | SVMP |
| 282 | TRINITY_DN5025_c0_g1_i11 | 873  |  | 731  |  | SVMP |
| 283 | TRINITY_DN5025_c0_g1_i3  | 873  |  | 731  |  | SVMP |
| 284 | TRINITY_DN15772_c0_g3_i1 | 738  |  | 701  |  | SVMP |
| 285 | TRINITY_DN15772_c0_g3_i2 | 738  |  | 701  |  | SVMP |
| 286 | TRINITY_DN2280_c0_g1_i6  | 553  |  | 743  |  | SVMP |
| 287 | TRINITY_DN225_c1_g1_i11  | 648  |  | 629  |  | SVMP |
| 288 | TRINITY_DN225_c1_g1_i2   | 648  |  | 629  |  | SVMP |
| 289 | TRINITY_DN10090_c0_g1_i2 | 476  |  | 490  |  | SVMP |
| 290 | TRINITY_DN10090_c0_g1_i4 | 476  |  | 490  |  | SVMP |
| 291 | TRINITY_DN2230_c0_g1_i2  | 408  |  | 464  |  | SVMP |
| 292 | TRINITY_DN2230_c0_g1_i9  | 408  |  | 464  |  | SVMP |
| 293 | TRINITY_DN2230_c0_g1_i7  | 408  |  | 464  |  | SVMP |
| 294 | TRINITY_DN2230_c0_g1_i4  | 408  |  | 464  |  | SVMP |

|     |                          |     |  |     |  |      |
|-----|--------------------------|-----|--|-----|--|------|
| 295 | TRINITY_DN2230_c0_g1_i5  | 408 |  | 464 |  | SVMP |
| 296 | TRINITY_DN2230_c0_g1_i1  | 408 |  | 464 |  | SVMP |
| 297 | TRINITY_DN2230_c0_g1_i8  | 408 |  | 464 |  | SVMP |
| 298 | TRINITY_DN2230_c0_g1_i6  | 408 |  | 464 |  | SVMP |
| 299 | TRINITY_DN3781_c0_g1_i4  | 310 |  | 316 |  | SVMP |
| 300 | TRINITY_DN901_c1_g1_i1   | 274 |  | 346 |  | SVMP |
| 301 | TRINITY_DN5467_c0_g1_i6  | 249 |  | 261 |  | SVMP |
| 302 | TRINITY_DN5467_c0_g1_i5  | 249 |  | 261 |  | SVMP |
| 303 | TRINITY_DN5467_c0_g1_i4  | 249 |  | 261 |  | SVMP |
| 304 | TRINITY_DN5467_c0_g1_i7  | 249 |  | 261 |  | SVMP |
| 305 | TRINITY_DN5467_c0_g1_i1  | 249 |  | 261 |  | SVMP |
| 306 | TRINITY_DN471_c0_g2_i1   | 287 |  | 209 |  | SVMP |
| 307 | TRINITY_DN2177_c1_g1_i2  | 179 |  | 242 |  | SVMP |
| 308 | TRINITY_DN2177_c1_g1_i1  | 179 |  | 242 |  | SVMP |
| 309 | TRINITY_DN1910_c1_g1_i3  | 201 |  | 185 |  | SVMP |
| 310 | TRINITY_DN1910_c1_g1_i1  | 201 |  | 185 |  | SVMP |
| 311 | TRINITY_DN1571_c1_g1_i2  | 158 |  | 159 |  | SVMP |
| 312 | TRINITY_DN1571_c1_g1_i3  | 158 |  | 159 |  | SVMP |
| 313 | TRINITY_DN12142_c0_g1_i7 | 134 |  | 149 |  | SVMP |
| 314 | TRINITY_DN12142_c0_g1_i4 | 134 |  | 149 |  | SVMP |
| 315 | TRINITY_DN12142_c0_g1_i2 | 134 |  | 149 |  | SVMP |
| 316 | TRINITY_DN12142_c0_g1_i6 | 134 |  | 149 |  | SVMP |
| 317 | TRINITY_DN12142_c0_g1_i1 | 134 |  | 149 |  | SVMP |
| 318 | TRINITY_DN12142_c0_g1_i5 | 134 |  | 149 |  | SVMP |
| 319 | TRINITY_DN12142_c0_g1_i3 | 134 |  | 149 |  | SVMP |
| 320 | TRINITY_DN3629_c0_g1_i9  | 117 |  | 157 |  | SVMP |
| 321 | TRINITY_DN5311_c0_g1_i5  | 136 |  | 134 |  | SVMP |

|     |                         |         |          |        |          |      |
|-----|-------------------------|---------|----------|--------|----------|------|
| 322 | TRINITY_DN754_c2_g1_i1  | 117     |          | 110    |          | SVMP |
| 323 | TRINITY_DN4004_c0_g1_i4 | 123     |          | 94     |          | SVMP |
| 324 | TRINITY_DN3245_c0_g1_i7 | 85      |          | 125    |          | SVMP |
| 325 | TRINITY_DN0_c0_g1_i3    | 1028266 | 19.0835% | 985655 | 21.4228% | SVSP |
| 326 | TRINITY_DN0_c0_g1_i13   | 1028266 |          | 985655 |          | SVSP |
| 327 | TRINITY_DN0_c0_g1_i8    | 1028266 |          | 985655 |          | SVSP |
| 328 | TRINITY_DN0_c0_g1_i2    | 1028266 |          | 985655 |          | SVSP |
| 329 | TRINITY_DN240_c0_g1_i5  | 260469  |          | 228576 |          | SVSP |
| 330 | TRINITY_DN240_c0_g1_i6  | 260469  |          | 228576 |          | SVSP |
| 331 | TRINITY_DN240_c0_g1_i8  | 260469  |          | 228576 |          | SVSP |
| 332 | TRINITY_DN240_c0_g1_i7  | 260469  |          | 228576 |          | SVSP |
| 333 | TRINITY_DN240_c0_g1_i3  | 260469  |          | 228576 |          | SVSP |
| 334 | TRINITY_DN441_c0_g1_i15 | 244521  |          | 215565 |          | SVSP |
| 335 | TRINITY_DN441_c0_g1_i20 | 244521  |          | 215565 |          | SVSP |
| 336 | TRINITY_DN441_c0_g1_i1  | 244521  |          | 215565 |          | SVSP |
| 337 | TRINITY_DN441_c0_g1_i8  | 244521  |          | 215565 |          | SVSP |
| 338 | TRINITY_DN441_c0_g1_i9  | 244521  |          | 215565 |          | SVSP |
| 339 | TRINITY_DN441_c0_g1_i13 | 244521  |          | 215565 |          | SVSP |
| 340 | TRINITY_DN441_c0_g1_i11 | 244521  |          | 215565 |          | SVSP |
| 341 | TRINITY_DN441_c0_g1_i5  | 244521  |          | 215565 |          | SVSP |
| 342 | TRINITY_DN441_c0_g1_i16 | 244521  |          | 215565 |          | SVSP |
| 343 | TRINITY_DN441_c0_g1_i19 | 244521  |          | 215565 |          | SVSP |
| 344 | TRINITY_DN441_c0_g1_i6  | 244521  |          | 215565 |          | SVSP |
| 345 | TRINITY_DN441_c0_g1_i3  | 244521  |          | 215565 |          | SVSP |
| 346 | TRINITY_DN626_c0_g1_i4  | 120375  |          | 116184 |          | SVSP |
| 347 | TRINITY_DN626_c0_g1_i5  | 120375  |          | 116184 |          | SVSP |
| 348 | TRINITY_DN626_c0_g1_i3  | 120375  |          | 116184 |          | SVSP |

|     |                         |        |  |        |  |      |
|-----|-------------------------|--------|--|--------|--|------|
| 349 | TRINITY_DN626_c0_g1_i13 | 120375 |  | 116184 |  | SVSP |
| 350 | TRINITY_DN626_c0_g1_i9  | 120375 |  | 116184 |  | SVSP |
| 351 | TRINITY_DN343_c0_g1_i3  | 104694 |  | 95680  |  | SVSP |
| 352 | TRINITY_DN343_c0_g1_i8  | 104694 |  | 95680  |  | SVSP |
| 353 | TRINITY_DN343_c0_g1_i6  | 104694 |  | 95680  |  | SVSP |
| 354 | TRINITY_DN343_c0_g1_i1  | 104694 |  | 95680  |  | SVSP |
| 355 | TRINITY_DN1328_c0_g1_i8 | 67012  |  | 62802  |  | SVSP |
| 356 | TRINITY_DN1328_c0_g1_i4 | 67012  |  | 62802  |  | SVSP |
| 357 | TRINITY_DN1328_c0_g1_i1 | 67012  |  | 62802  |  | SVSP |
| 358 | TRINITY_DN1328_c0_g1_i7 | 67012  |  | 62802  |  | SVSP |
| 359 | TRINITY_DN1328_c0_g1_i5 | 67012  |  | 62802  |  | SVSP |
| 360 | TRINITY_DN1328_c0_g1_i6 | 67012  |  | 62802  |  | SVSP |
| 361 | TRINITY_DN424_c0_g2_i2  | 38961  |  | 40631  |  | SVSP |
| 362 | TRINITY_DN424_c0_g2_i3  | 38961  |  | 40631  |  | SVSP |
| 363 | TRINITY_DN424_c0_g2_i4  | 38961  |  | 40631  |  | SVSP |
| 364 | TRINITY_DN424_c0_g2_i1  | 38961  |  | 40631  |  | SVSP |
| 365 | TRINITY_DN0_c16_g1_i2   | 37666  |  | 39022  |  | SVSP |
| 366 | TRINITY_DN1959_c0_g1_i3 | 36961  |  | 35266  |  | SVSP |
| 367 | TRINITY_DN1959_c0_g1_i4 | 36961  |  | 35266  |  | SVSP |
| 368 | TRINITY_DN424_c0_g1_i5  | 28805  |  | 27219  |  | SVSP |
| 369 | TRINITY_DN424_c0_g1_i6  | 28805  |  | 27219  |  | SVSP |
| 370 | TRINITY_DN424_c0_g1_i2  | 28805  |  | 27219  |  | SVSP |
| 371 | TRINITY_DN424_c0_g1_i4  | 28805  |  | 27219  |  | SVSP |
| 372 | TRINITY_DN240_c1_g1_i4  | 14684  |  | 13638  |  | SVSP |
| 373 | TRINITY_DN240_c1_g1_i15 | 14684  |  | 13638  |  | SVSP |
| 374 | TRINITY_DN240_c1_g1_i3  | 14684  |  | 13638  |  | SVSP |
| 375 | TRINITY_DN240_c1_g1_i14 | 14684  |  | 13638  |  | SVSP |

|     |                          |        |         |        |         |      |
|-----|--------------------------|--------|---------|--------|---------|------|
| 376 | TRINITY_DN240_c1_g1_i1   | 14684  |         | 13638  |         | SVSP |
| 377 | TRINITY_DN240_c1_g1_i12  | 14684  |         | 13638  |         | SVSP |
| 378 | TRINITY_DN13494_c0_g1_i1 | 2364   |         | 2056   |         | SVSP |
| 379 | TRINITY_DN5609_c0_g1_i9  | 1670   |         | 1436   |         | SVSP |
| 380 | TRINITY_DN5609_c0_g1_i3  | 1670   |         | 1436   |         | SVSP |
| 381 | TRINITY_DN5609_c0_g1_i2  | 1670   |         | 1436   |         | SVSP |
| 382 | TRINITY_DN5609_c0_g1_i7  | 1670   |         | 1436   |         | SVSP |
| 383 | TRINITY_DN5609_c0_g1_i4  | 1670   |         | 1436   |         | SVSP |
| 384 | TRINITY_DN5609_c0_g1_i6  | 1670   |         | 1436   |         | SVSP |
| 385 | TRINITY_DN1660_c0_g1_i3  | 439    |         | 429    |         | SVSP |
| 386 | TRINITY_DN1660_c0_g1_i2  | 439    |         | 429    |         | SVSP |
| 387 | TRINITY_DN1959_c0_g2_i1  | 372    |         | 424    |         | SVSP |
| 388 | TRINITY_DN21404_c0_g1_i3 | 336    |         | 300    |         | SVSP |
| 389 | TRINITY_DN21404_c0_g1_i1 | 336    |         | 300    |         | SVSP |
| 390 | TRINITY_DN21404_c0_g1_i2 | 336    |         | 300    |         | SVSP |
| 391 | TRINITY_DN21404_c0_g1_i5 | 336    |         | 300    |         | SVSP |
| 392 | TRINITY_DN11879_c0_g1_i1 | 305    |         | 300    |         | SVSP |
| 393 | TRINITY_DN10537_c1_g2_i1 | 145    |         | 148    |         | SVSP |
| 394 | TRINITY_DN4899_c0_g1_i1  | 113    |         | 96     |         | SVSP |
| 395 | TRINITY_DN4899_c0_g1_i3  | 113    |         | 96     |         | SVSP |
| 396 | TRINITY_DN588_c0_g1_i5   | 633157 | 4.1692% | 559413 | 4.5800% | VEGF |
| 397 | TRINITY_DN588_c0_g1_i6   | 633157 |         | 559413 |         | VEGF |
| 398 | TRINITY_DN588_c0_g1_i3   | 633157 |         | 559413 |         | VEGF |
| 399 | TRINITY_DN19_c0_g1_i12   | 48630  |         | 49815  |         | VEGF |
| 400 | TRINITY_DN19_c0_g1_i11   | 48630  |         | 49815  |         | VEGF |
| 401 | TRINITY_DN19_c0_g1_i1    | 48630  |         | 49815  |         | VEGF |
| 402 | TRINITY_DN19_c0_g1_i3    | 48630  |         | 49815  |         | VEGF |

|                 |                           |         |          |         |          |                                 |
|-----------------|---------------------------|---------|----------|---------|----------|---------------------------------|
| 403             | TRINITY_DN19_c0_g1_i8     | 48630   |          | 49815   |          | VEGF                            |
| 404             | TRINITY_DN19_c0_g1_i2     | 48630   |          | 49815   |          | VEGF                            |
| 405             | TRINITY_DN19_c0_g1_i9     | 48630   |          | 49815   |          | VEGF                            |
| 406             | TRINITY_DN19_c0_g2_i1     | 1215    |          | 1598    |          | VEGF                            |
| 407             | TRINITY_DN10045_c2_g1_i1  | 173     |          | 168     |          | VEGF                            |
| 408             | TRINITY_DN101577_c0_g1_i1 | 249     | 0.0005%  | 112     | 0.0003%  | Venom factor                    |
| 409             | TRINITY_DN3484_c0_g1_i1   | 89      | 0.0002%  | 123     | 0.0003%  | Waprin                          |
| Total Abundance |                           |         | 100.00%  |         | 100.00%  |                                 |
|                 |                           |         |          |         |          |                                 |
| 410             | TRINITY_DN960_c0_g1_i1    | 7208426 | 12.5006% | 6245792 | 12.5007% | SVMPI                           |
| 411             | TRINITY_DN3982_c0_g2_i1   | 258     |          | 258     |          | SVMPI                           |
| 412             | TRINITY_DN89609_c0_g1_i1  | 134     |          | 141     |          | SVMPI                           |
| 413             | TRINITY_DN960_c0_g1_i2    | 7208426 | 62.4996% | 6245792 | 62.4995% | SVMPI, BPP                      |
| 414             | TRINITY_DN960_c0_g1_i9    | 7208426 |          | 6245792 |          | SVMPI, BPP                      |
| 415             | TRINITY_DN960_c0_g1_i8    | 7208426 |          | 6245792 |          | SVMPI, BPP                      |
| 416             | TRINITY_DN960_c0_g1_i5    | 7208426 |          | 6245792 |          | SVMPI, BPP                      |
| 417             | TRINITY_DN960_c0_g1_i6    | 7208426 |          | 6245792 |          | SVMPI, BPP                      |
| 418             | TRINITY_DN960_c0_g1_i3    | 7208426 | 24.9998% | 6245792 | 24.9998% | SVMPI, BPP, Natriuretic peptide |
| 419             | TRINITY_DN960_c0_g1_i10   | 7208426 |          | 6245792 |          | SVMPI, BPP, Natriuretic peptide |
| Total Abundance |                           |         | 100.00%  |         | 100.00%  |                                 |

Each toxin family and the corresponding relative abundance is uniquely color coded.

**Supplementary Table S4.** Toxicity profiles of *Daboia* venoms.

| Sample ID             | Venom Dose (µg) |     |   |     |      | Number of survivors |   |   |   |   | LD <sub>50</sub><br>(µg/mouse) | LD <sub>50</sub><br>(mg/Kg) |
|-----------------------|-----------------|-----|---|-----|------|---------------------|---|---|---|---|--------------------------------|-----------------------------|
| <i>D. palaestinae</i> | 3.84            | 4.8 | 6 | 7.5 | 9.37 | 5                   | 5 | 4 | 1 | 0 | 6.71<br>6.19- 7.26             | 0.34<br>0.31-0.36           |
| <i>D. russelii</i>    | 2.56            | 3.2 | 4 | 5   | 6.25 | 4                   | 4 | 3 | 1 | 0 | 3.98<br>3.41- 4.65             | 0.20<br>0.171- 0.24         |

This table shows the median lethal dose and survivorship data for *Daboia* venoms.
